# Supplementary material for: Transcriptome Remodeling in Trypanosoma cruzi and Human Cells during Intracellular Infection
Source: PubMed Central journal article supplement (PMC4821583; doi:10.1371/journal.ppat.1005511), 2016-04-05

A

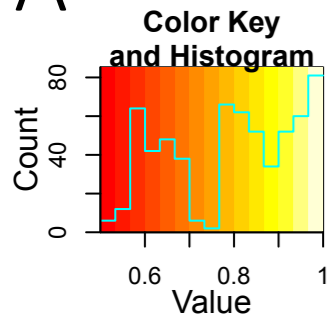*T. cruzi*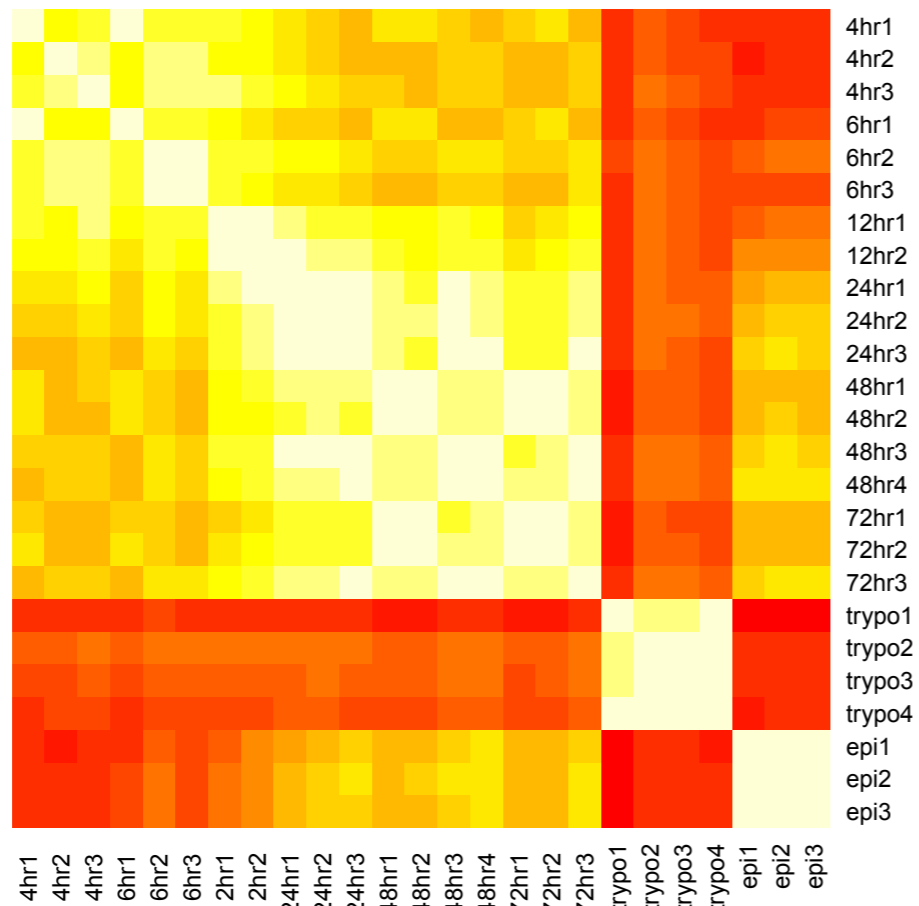

B

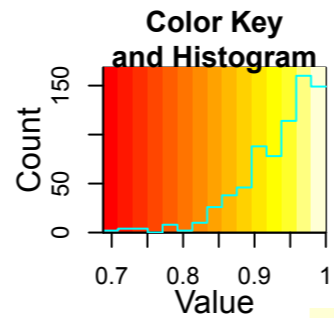

human

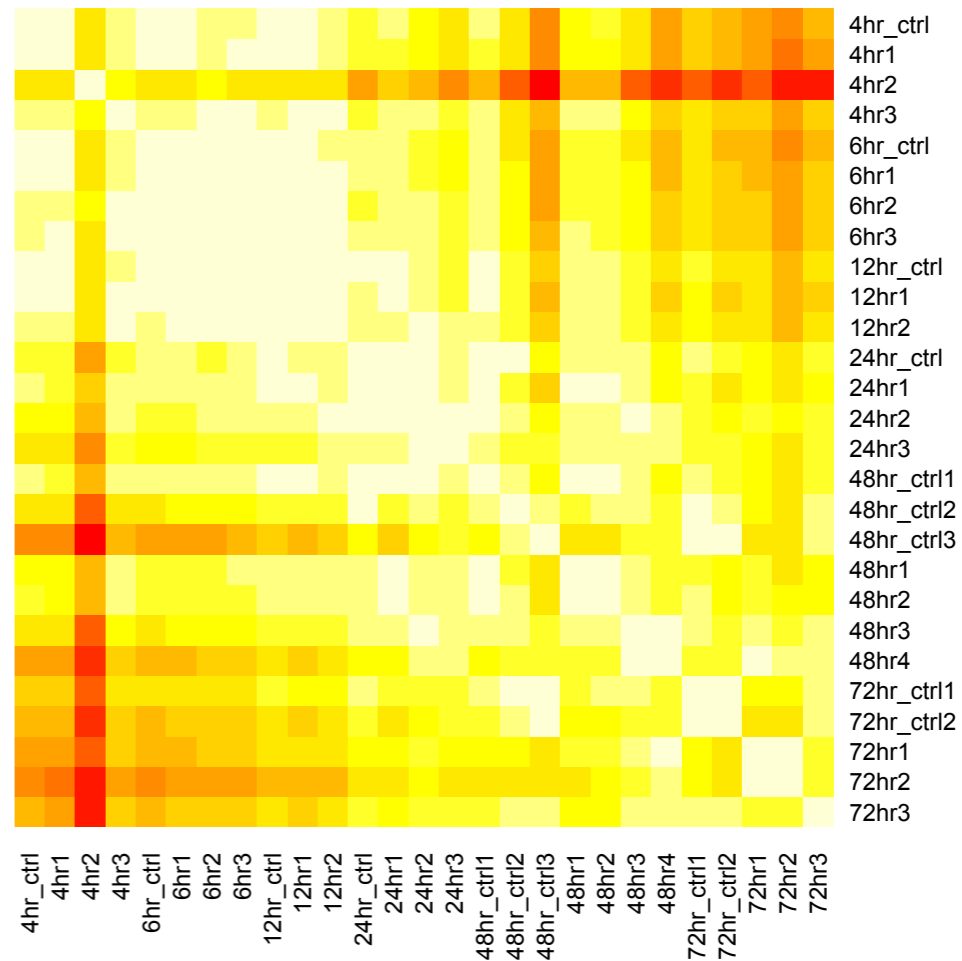

Supplement: ppat.1005511.s003.pdf [file ppat.1005511.s003.pdf]
