# Supplementary material for: Transcriptome Remodeling in Trypanosoma cruzi and Human Cells during Intracellular Infection
Source: PubMed Central journal article supplement (PMC4821583; doi:10.1371/journal.ppat.1005511), 2016-04-05

# A. *T. cruzi*

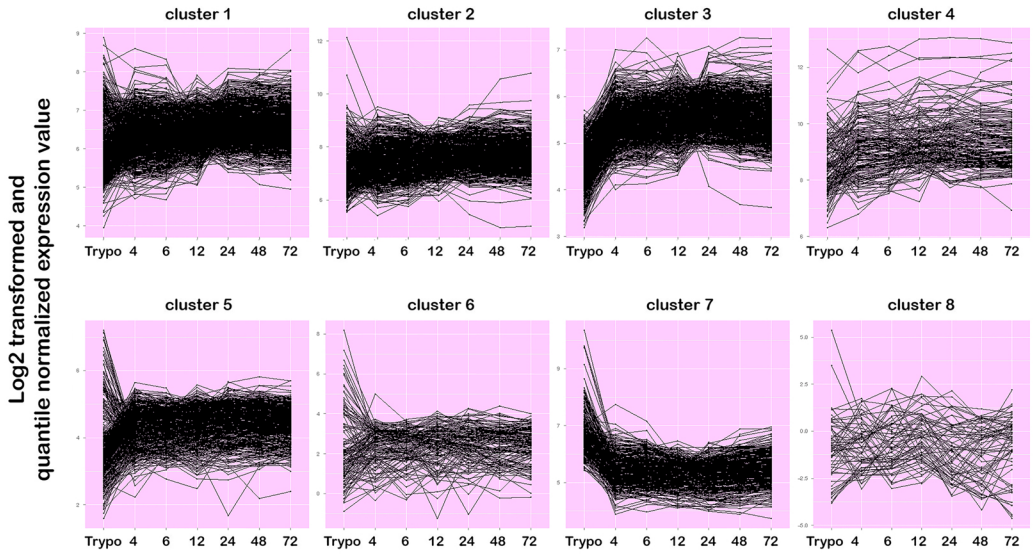

# B. Human

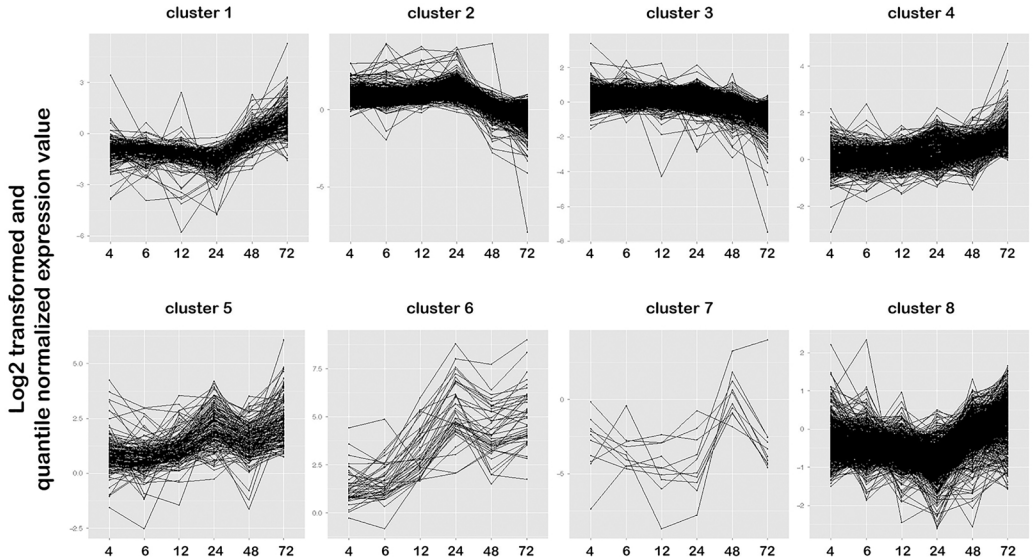

Supplement: ppat.1005511.s008.pdf [file ppat.1005511.s008.pdf]
