# Supplementary material for: Transcriptome Remodeling in Trypanosoma cruzi and Human Cells during Intracellular Infection
Source: PLoS Pathog. 2016 Apr 5;12(4):e1005511. doi: 10.1371/journal.ppat.1005511 (PMC4821583; doi:10.1371/journal.ppat.1005511)
Supplement: S6 Table — Differentially expressed genes from S5 Table were filtered to remove all but a single representative of each paralogous gene group. These filtered gene lists served as the starting point for k-means clustering and functional enrichment analyses. (XLSX) [file ppat.1005511.s016.xlsx]

## Sheet: Summary and Legend
Supplementary Table 5A. Differentially Expressed Genes in Trypanosoma cruzi life stages_Paralogues collapsed. Each list of differentially expressed T. cruzi genes generated from pairwise comparisons (Table S5) was filtered to remove all but a single representative gene for each paralogous group as described in the Methods.
Tab Labels	Definition
Epi	Epimastigote
Trypo	Trypomastigote
Ama(X)	Intracellular Amastigotes at (X) hours of intracellular development
Column identifiers	Definition
TriTrypDB Gene ID	TriTrypDB gene identifier (http://tritrypdb.org)
Annotation	Gene annotation from TriTrypDB
log2Fold-change	log2 transformed fold change of the gene expression values between the two time points
P-value	P value of the comparison , output from Limma package
Qval	Q value of the comparison , calculated from P value for the correction of Type I error.
Adj.P.Val	Adjusted P value of the comparison , output from Limma package
AveExpr	Quantile normalized and log transformed gene expression value, output from Limma package
Qvals.fc	Indicator of whether a comparison has Q value < 0.05 and a log2 fold change > 1 (Pass=1; Fail=0)
AdjPvals.fc	Indicator of whether a comparison has adjusted P value < 0.05 and a log2 fold change > 1 (Pass=1; Fail=0)
TriTrypDB Link	Weblink to TriTypDB website
Interpretation
eg. Pairwise comparison: A vs B
If log2Fold-change > 1.0, then gene of interest is more highly expressed in B
If log2Fold-change <-1.0 Gene of interest is more highly expressed in A

## Sheet: Epi vs Trypo
TriTrypDB Gene ID	Annotation	log2Fold-change	P-value	Qval	adj.P.Val	AveExpr	Qvals.fc	AdjPvals.fc	TriTrypDB Link
TcCLB.506047.20	retrotransposon_hot_spot_(RHS)_protein_putative	-11.4898	8.8e-14	3.55e-13	2.36e-12	-0.0956787	1	1	http://tritrypdb.org/gene/TcCLB.506047.20
TcCLB.508607.40	retrotransposon_hot_spot_protein_(RHS_pseudogene)_putative	-10.2258	1.1e-11	1.98e-11	1.32e-10	-0.401624	1	1	http://tritrypdb.org/gene/TcCLB.508607.40
TcCLB.508285.10	retrotransposon_hot_spot_(RHS)_protein_putative	-9.78656	2.61e-11	4.09e-11	2.71e-10	-0.0721605	1	1	http://tritrypdb.org/gene/TcCLB.508285.10
TcCLB.508039.10	retrotransposon_hot_spot_protein_(RHS_pseudogene)_putative	-8.73219	2.13e-11	3.46e-11	2.3e-10	-0.248136	1	1	http://tritrypdb.org/gene/TcCLB.508039.10
TcCLB.509993.5	hypothetical_protein_conserved_(pseudogene)	-8.62266	3.21e-12	7.03e-12	4.67e-11	-0.840092	1	1	http://tritrypdb.org/gene/TcCLB.509993.5
TcCLB.430737.10	proline_racemaseB-cell_mitogen_precursor_putative	-7.82929	2.07e-11	3.38e-11	2.24e-10	-1.00983	1	1	http://tritrypdb.org/gene/TcCLB.430737.10
TcCLB.507555.80	retrotransposon_hot_spot_(RHS)_protein_putative	-7.58974	2.15e-10	2.52e-10	1.67e-09	2.49279	1	1	http://tritrypdb.org/gene/TcCLB.507555.80
TcCLB.508037.10	retrotransposon_hot_spot_(RHS)_protein_putative	-7.44461	1.89e-11	3.12e-11	2.07e-10	2.08949	1	1	http://tritrypdb.org/gene/TcCLB.508037.10
TcCLB.508279.10	trans-sialidase_(pseudogene)_putative	-7.34211	5.18e-12	1.05e-11	6.99e-11	-1.08895	1	1	http://tritrypdb.org/gene/TcCLB.508279.10
TcCLB.508285.40	retrotransposon_hot_spot_protein_(RHS_pseudogene)_putativeretrotransposon_hot_spot_protein_1_(RHS1)_putative_interrupted	-7.03363	7.59e-11	1.03e-10	6.84e-10	-1.0305	1	1	http://tritrypdb.org/gene/TcCLB.508285.40
TcCLB.509973.10	mucin-associated_surface_protein_(MASP)_putative	-6.96772	5.48e-12	1.1e-11	7.32e-11	-0.544426	1	1	http://tritrypdb.org/gene/TcCLB.509973.10
TcCLB.508605.10	retrotransposon_hot_spot_protein_(RHS_pseudogene)_putative	-6.96271	1.66e-10	2.02e-10	1.34e-09	-1.1904	1	1	http://tritrypdb.org/gene/TcCLB.508605.10
TcCLB.506625.50	hypothetical_protein	-6.83829	1.4e-11	2.43e-11	1.61e-10	-1.20595	1	1	http://tritrypdb.org/gene/TcCLB.506625.50
TcCLB.506623.40	retrotransposon_hot_spot_protein_(RHS_pseudogene)_putative	-6.79736	2.61e-08	1.74e-08	1.16e-07	1.26242	1	1	http://tritrypdb.org/gene/TcCLB.506623.40
TcCLB.508039.30	retrotransposon_hot_spot_(RHS)_protein_putative	-6.72228	6.95e-15	5.1e-14	3.38e-13	2.12432	1	1	http://tritrypdb.org/gene/TcCLB.508039.30
TcCLB.508283.60	retrotransposon_hot_spot_protein_(RHS_pseudogene)_putative	-6.7174	2.34e-10	2.71e-10	1.8e-09	-1.14262	1	1	http://tritrypdb.org/gene/TcCLB.508283.60
TcCLB.459793.20	mucin-associated_surface_protein_(MASP_pseudogene)_putative	-6.66661	4.71e-09	3.82e-09	2.53e-08	0.049018	1	1	http://tritrypdb.org/gene/TcCLB.459793.20
TcCLB.508283.25	hypothetical_protein_conserved_(pseudogene)	-6.39734	9.96e-09	7.34e-09	4.87e-08	-0.62016	1	1	http://tritrypdb.org/gene/TcCLB.508283.25
TcCLB.509645.30	hypothetical_protein_conserved	-6.31464	2.59e-09	2.26e-09	1.5e-08	2.17353	1	1	http://tritrypdb.org/gene/TcCLB.509645.30
TcCLB.430737.20	hypothetical_protein_conserved	-6.30538	2.14e-09	1.9e-09	1.26e-08	1.69023	1	1	http://tritrypdb.org/gene/TcCLB.430737.20
TcCLB.506933.107	hypothetical_protein_conserved	-6.28228	5.8e-10	6.07e-10	4.03e-09	0.452861	1	1	http://tritrypdb.org/gene/TcCLB.506933.107
TcCLB.503447.60	beta_galactofuranosyl_glycosyltransferase_putative	-6.1179	1.82e-10	2.19e-10	1.45e-09	0.315723	1	1	http://tritrypdb.org/gene/TcCLB.503447.60
TcCLB.510449.20	hypothetical_protein_conserved_(pseudogene)	-6.07568	2.07e-10	2.45e-10	1.63e-09	-1.30127	1	1	http://tritrypdb.org/gene/TcCLB.510449.20
TcCLB.506125.20	hypothetical_protein_conserved	-6.00764	3.09e-10	3.45e-10	2.29e-09	1.07215	1	1	http://tritrypdb.org/gene/TcCLB.506125.20
TcCLB.509769.40	hypothetical_protein_conserved	-5.8913	3.48e-07	1.76e-07	1.17e-06	0.438401	1	1	http://tritrypdb.org/gene/TcCLB.509769.40
TcCLB.508285.5	trans-sialidase_(pseudogene)_putative	-5.72851	3.82e-09	3.18e-09	2.11e-08	1.14421	1	1	http://tritrypdb.org/gene/TcCLB.508285.5
TcCLB.442427.10	trans-sialidase_(pseudogene)_putative	-5.64318	8.48e-10	8.43e-10	5.6e-09	0.441104	1	1	http://tritrypdb.org/gene/TcCLB.442427.10
TcCLB.504099.40	retrotransposon_hot_spot_protein_(RHS_pseudogene)_putative	-5.61985	7.55e-10	7.62e-10	5.06e-09	0.93023	1	1	http://tritrypdb.org/gene/TcCLB.504099.40
TcCLB.507555.70	trans-sialidase_(pseudogene)_putative	-5.56184	6.86e-09	5.29e-09	3.51e-08	0.870326	1	1	http://tritrypdb.org/gene/TcCLB.507555.70
TcCLB.511075.9	fatty_acid_desaturase_putative	-5.53778	1.11e-18	8.84e-17	5.87e-16	6.35315	1	1	http://tritrypdb.org/gene/TcCLB.511075.9
TcCLB.506127.9	phosphoglycerate_kinase_putative	-5.4912	3.89e-06	1.59e-06	1.05e-05	0.353583	1	1	http://tritrypdb.org/gene/TcCLB.506127.9
TcCLB.505123.10	hypothetical_protein_conserved	-5.48898	8.34e-10	8.31e-10	5.52e-09	1.37702	1	1	http://tritrypdb.org/gene/TcCLB.505123.10
TcCLB.508607.60	beta_galactofuranosyl_glycosyltransferase_putative	-5.39677	8.19e-11	1.1e-10	7.32e-10	1.43583	1	1	http://tritrypdb.org/gene/TcCLB.508607.60
TcCLB.511613.10	mucin-associated_surface_protein_(MASP)_putative	-5.36492	4.29e-09	3.51e-09	2.33e-08	-1.23087	1	1	http://tritrypdb.org/gene/TcCLB.511613.10
TcCLB.511073.10	fatty_acid_desaturase_putative	-5.29424	8.29e-18	4.19e-16	2.78e-15	6.43418	1	1	http://tritrypdb.org/gene/TcCLB.511073.10
TcCLB.508607.70	trans-sialidase_(pseudogene)_putative	-5.26437	3.04e-11	4.64e-11	3.08e-10	1.99431	1	1	http://tritrypdb.org/gene/TcCLB.508607.70
TcCLB.510257.80	peptidase_M20/M25/M40_putative	-5.19691	4.02e-19	4.95e-17	3.28e-16	6.17978	1	1	http://tritrypdb.org/gene/TcCLB.510257.80
TcCLB.508605.40	retrotransposon_hot_spot_protein_(RHS_pseudogene)_putative	-5.00724	1.41e-09	1.32e-09	8.8e-09	1.00244	1	1	http://tritrypdb.org/gene/TcCLB.508605.40
TcCLB.478711.10	trans-sialidase_(pseudogene)_putative	-4.95999	1.24e-10	1.58e-10	1.05e-09	2.86895	1	1	http://tritrypdb.org/gene/TcCLB.478711.10
TcCLB.511467.4	hypothetical_protein_conserved	-4.95385	7.92e-11	1.07e-10	7.1e-10	2.64811	1	1	http://tritrypdb.org/gene/TcCLB.511467.4
TcCLB.511215.90	hypothetical_protein_conserved	-4.91587	3.65e-10	4.01e-10	2.66e-09	0.621431	1	1	http://tritrypdb.org/gene/TcCLB.511215.90
TcCLB.511441.20	calpain-like_cysteine_peptidase_putative	-4.8327	3.38e-06	1.4e-06	9.3e-06	-0.416399	1	1	http://tritrypdb.org/gene/TcCLB.511441.20
TcCLB.507739.120	amastin_putative	-4.71506	1.41e-15	1.44e-14	9.58e-14	5.39318	1	1	http://tritrypdb.org/gene/TcCLB.507739.120
TcCLB.506717.240	hypothetical_protein_conserved	-4.6707	1.45e-06	6.48e-07	4.3e-06	0.414319	1	1	http://tritrypdb.org/gene/TcCLB.506717.240
TcCLB.454787.20	elongation_factor_1-gamma_(EF-1-gamma_pseudogene)_putative	-4.66467	8.97e-08	5.23e-08	3.47e-07	-1.2058	1	1	http://tritrypdb.org/gene/TcCLB.454787.20
TcCLB.506467.50	serine/threonine_protein_kinase_putative	-4.58851	1.69e-11	2.85e-11	1.89e-10	3.68987	1	1	http://tritrypdb.org/gene/TcCLB.506467.50
TcCLB.510879.10	serine/threonine-protein_phosphatase_2A_catalytic_subunit_putative	-4.54643	3.57e-08	2.3e-08	1.53e-07	0.307006	1	1	http://tritrypdb.org/gene/TcCLB.510879.10
TcCLB.509965.394	amastin_putative	-4.54119	4.45e-13	1.35e-12	8.96e-12	3.47929	1	1	http://tritrypdb.org/gene/TcCLB.509965.394
TcCLB.508039.90	phosphoinositide-specific_phospholipase_C_(pseudogene)_putativephosphoinositide-specific_phospholipase_C_putative_frameshift	-4.51588	6.69e-09	5.19e-09	3.44e-08	1.63728	1	1	http://tritrypdb.org/gene/TcCLB.508039.90
TcCLB.506933.98	dual_specificity_protein_phosphatase_putative	-4.50189	1.91e-07	1.03e-07	6.85e-07	2.12021	1	1	http://tritrypdb.org/gene/TcCLB.506933.98
TcCLB.420293.31	hypothetical_protein	-4.50031	4.05e-06	1.65e-06	1.09e-05	0.539847	1	1	http://tritrypdb.org/gene/TcCLB.420293.31
TcCLB.508283.40	trans-sialidase_(pseudogene)_putative	-4.43451	4.48e-08	2.83e-08	1.88e-07	1.54609	1	1	http://tritrypdb.org/gene/TcCLB.508283.40
TcCLB.511369.5	elongation_factor_1-alpha_(ef-1-alpha)_putative	-4.43428	2.17e-19	3.79e-17	2.52e-16	5.99421	1	1	http://tritrypdb.org/gene/TcCLB.511369.5
TcCLB.510451.21	trans-sialidase_(pseudogene)_putative	-4.4305	1.57e-07	8.63e-08	5.73e-07	-0.312048	1	1	http://tritrypdb.org/gene/TcCLB.510451.21
TcCLB.504057.178	hypothetical_protein_conserved	-4.39261	6.28e-08	3.8e-08	2.52e-07	1.96892	1	1	http://tritrypdb.org/gene/TcCLB.504057.178
TcCLB.506239.10	hypothetical_protein_conserved	-4.36245	7.68e-17	1.78e-15	1.18e-14	5.48611	1	1	http://tritrypdb.org/gene/TcCLB.506239.10
TcCLB.510613.40	hypothetical_protein_conserved	-4.3298	9.05e-13	2.42e-12	1.6e-11	3.87456	1	1	http://tritrypdb.org/gene/TcCLB.510613.40
TcCLB.503991.39	24-dihydroxyhept-2-ene-17-dioic_acid_aldolase_putative	-4.32358	2.01e-16	3.42e-15	2.27e-14	5.51566	1	1	http://tritrypdb.org/gene/TcCLB.503991.39
TcCLB.508125.14	mucin-associated_surface_protein_(MASP)_putative	-4.2726	2.26e-06	9.65e-07	6.41e-06	0.562004	1	1	http://tritrypdb.org/gene/TcCLB.508125.14
TcCLB.507875.20	glutamate_dehydrogenase_putative	-4.26263	4.17e-19	4.95e-17	3.28e-16	8.60619	1	1	http://tritrypdb.org/gene/TcCLB.507875.20
TcCLB.506127.30	phenylalanyl-tRNA_synthetase_putative	-4.23022	4.95e-13	1.47e-12	9.73e-12	4.58531	1	1	http://tritrypdb.org/gene/TcCLB.506127.30
TcCLB.506357.50	alcohol_dehydrogenase_putative	-4.19331	1.17e-17	4.87e-16	3.24e-15	5.61704	1	1	http://tritrypdb.org/gene/TcCLB.506357.50
TcCLB.504047.5	urocanate_hydratase_putative	-4.18426	3.71e-11	5.49e-11	3.65e-10	3.31651	1	1	http://tritrypdb.org/gene/TcCLB.504047.5
TcCLB.509645.19	hypothetical_protein_conserved	-4.17016	6.16e-10	6.39e-10	4.25e-09	2.56634	1	1	http://tritrypdb.org/gene/TcCLB.509645.19
TcCLB.510911.58	retrotransposon_hot_spot_protein_(RHS_pseudogene)_putative	-4.13988	2.29e-05	8.05e-06	5.34e-05	-1.06682	1	1	http://tritrypdb.org/gene/TcCLB.510911.58
TcCLB.504099.15	hypothetical_protein	-4.10344	6.83e-07	3.27e-07	2.17e-06	0.205513	1	1	http://tritrypdb.org/gene/TcCLB.504099.15
TcCLB.506925.370	MP44_(pseudogene)_putative	-4.0841	1.61e-07	8.89e-08	5.9e-07	1.79999	1	1	http://tritrypdb.org/gene/TcCLB.506925.370
TcCLB.482097.20	hypothetical_protein_conserved	-4.06788	9.65e-10	9.41e-10	6.25e-09	2.5597	1	1	http://tritrypdb.org/gene/TcCLB.482097.20
TcCLB.503977.79	elongation_factor_1-gamma_(EF-1-gamma)_putative	-4.06606	3.76e-07	1.9e-07	1.26e-06	-1.55248	1	1	http://tritrypdb.org/gene/TcCLB.503977.79
TcCLB.503447.40	retrotransposon_hot_spot_(RHS)_protein_putative	-4.03477	2.6e-08	1.73e-08	1.15e-07	2.12696	1	1	http://tritrypdb.org/gene/TcCLB.503447.40
TcCLB.509965.390	amastin_putative	-4.03092	6.26e-17	1.59e-15	1.06e-14	4.7866	1	1	http://tritrypdb.org/gene/TcCLB.509965.390
TcCLB.503747.10	tyrosine_aminotransferase_putative	-4.02158	1.15e-14	7.32e-14	4.86e-13	4.78292	1	1	http://tritrypdb.org/gene/TcCLB.503747.10
TcCLB.511685.60	hypothetical_protein_conserved	-3.99182	2.96e-08	1.95e-08	1.3e-07	0.992556	1	1	http://tritrypdb.org/gene/TcCLB.511685.60
TcCLB.457109.9	dispersed_gene_family_protein_1_(DGF-1)_putative	-3.95326	2.6e-06	1.1e-06	7.31e-06	0.859191	1	1	http://tritrypdb.org/gene/TcCLB.457109.9
TcCLB.506237.19	hypothetical_protein_conserved	-3.91806	1.08e-06	4.95e-07	3.29e-06	0.789996	1	1	http://tritrypdb.org/gene/TcCLB.506237.19
TcCLB.507843.20	trans-sialidase_putative	-3.90864	1.54e-05	5.6e-06	3.72e-05	0.842266	1	1	http://tritrypdb.org/gene/TcCLB.507843.20
TcCLB.504225.20	hypothetical_protein_conserved_(pseudogene)	-3.89306	6e-10	6.25e-10	4.15e-09	4.17831	1	1	http://tritrypdb.org/gene/TcCLB.504225.20
TcCLB.506221.110	chromosomal_passenger_protein_putative	-3.87843	1.87e-16	3.39e-15	2.25e-14	6.40844	1	1	http://tritrypdb.org/gene/TcCLB.506221.110
TcCLB.477079.10	protein_kinase_putative	-3.84222	1.48e-05	5.4e-06	3.59e-05	-0.170698	1	1	http://tritrypdb.org/gene/TcCLB.477079.10
TcCLB.508227.51	surface_protease_GP63_(pseudogene)_putative	-3.83541	6.5e-07	3.13e-07	2.08e-06	-1.23502	1	1	http://tritrypdb.org/gene/TcCLB.508227.51
TcCLB.510815.9	dispersed_gene_family_protein_1_(DGF-1)_putative	-3.81141	2.49e-09	2.17e-09	1.44e-08	3.32023	1	1	http://tritrypdb.org/gene/TcCLB.510815.9
TcCLB.509805.190	hypothetical_protein_conserved	-3.80675	2.7e-16	4.17e-15	2.77e-14	5.27961	1	1	http://tritrypdb.org/gene/TcCLB.509805.190
TcCLB.510535.100	cysteine_peptidase_C_(CPC)_putativecathepsin_B-like_protease_putativeCPC_cysteine_peptidase_clan_CA_family_C1_putative	-3.80042	1.99e-17	6.94e-16	4.61e-15	6.368	1	1	http://tritrypdb.org/gene/TcCLB.510535.100
TcCLB.508215.3	protein_kinase_putative	-3.79113	8.48e-06	3.24e-06	2.15e-05	0.573287	1	1	http://tritrypdb.org/gene/TcCLB.508215.3
TcCLB.415331.10	trans-sialidase_(pseudogene)_putative	-3.76585	4.07e-06	1.65e-06	1.1e-05	1.53132	1	1	http://tritrypdb.org/gene/TcCLB.415331.10
TcCLB.511467.10	hypothetical_protein_conserved	-3.74927	1.97e-10	2.34e-10	1.56e-09	3.55086	1	1	http://tritrypdb.org/gene/TcCLB.511467.10
TcCLB.400945.10	trans-sialidase_(pseudogene)_putative	-3.68423	7.83e-08	4.62e-08	3.07e-07	-0.111069	1	1	http://tritrypdb.org/gene/TcCLB.400945.10
TcCLB.509157.220	hypothetical_protein_conserved	-3.68065	4.86e-15	3.91e-14	2.6e-13	5.59891	1	1	http://tritrypdb.org/gene/TcCLB.509157.220
TcCLB.480997.10	hypothetical_protein_conserved	-3.6763	5.08e-06	2.03e-06	1.35e-05	1.25809	1	1	http://tritrypdb.org/gene/TcCLB.480997.10
TcCLB.503419.30	thiol-dependent_reductase_1_putativethiol_transferase_putativeglutathione_s-transferase_putative	-3.66629	6.78e-21	5.11e-18	3.39e-17	8.13593	1	1	http://tritrypdb.org/gene/TcCLB.503419.30
TcCLB.503659.10	mucin-associated_surface_protein_(MASP)_putative	-3.63602	3.32e-05	1.14e-05	7.54e-05	-1.07609	1	1	http://tritrypdb.org/gene/TcCLB.503659.10
TcCLB.508607.10	retrotransposon_hot_spot_(RHS)_protein_putative	-3.63074	1.08e-05	4.05e-06	2.69e-05	1.12871	1	1	http://tritrypdb.org/gene/TcCLB.508607.10
TcCLB.503715.20	hypothetical_protein	-3.62171	4.19e-10	4.53e-10	3.01e-09	4.9494	1	1	http://tritrypdb.org/gene/TcCLB.503715.20
TcCLB.509197.50	hypothetical_protein_conserved	-3.62021	3.24e-17	1.02e-15	6.77e-15	5.05154	1	1	http://tritrypdb.org/gene/TcCLB.509197.50
TcCLB.506125.30	phosphoglycerate_kinase_putative	-3.60106	2.03e-09	1.82e-09	1.21e-08	2.73565	1	1	http://tritrypdb.org/gene/TcCLB.506125.30
TcCLB.506473.4	hypothetical_protein_conserved_(pseudogene)	-3.58677	1.44e-06	6.42e-07	4.26e-06	-1.61239	1	1	http://tritrypdb.org/gene/TcCLB.506473.4
TcCLB.510971.10	dispersed_gene_family_protein_1_(DGF-1)_putative	-3.57488	6.8e-09	5.26e-09	3.49e-08	2.68532	1	1	http://tritrypdb.org/gene/TcCLB.510971.10
TcCLB.508585.29	serine/threonine_protein_phosphatase_putative	-3.5611	1.16e-05	4.3e-06	2.86e-05	0.00701204	1	1	http://tritrypdb.org/gene/TcCLB.508585.29
TcCLB.510859.10	nucleolar_RNA-binding_protein_putative	-3.55566	1.19e-14	7.47e-14	4.96e-13	7.24089	1	1	http://tritrypdb.org/gene/TcCLB.510859.10
TcCLB.507603.220	hypothetical_protein	-3.55265	7.32e-13	2.03e-12	1.35e-11	4.2771	1	1	http://tritrypdb.org/gene/TcCLB.507603.220
TcCLB.508285.50	retrotransposon_hot_spot_protein_(RHS_pseudogene)_putativeretrotransposon_hot_spot_protein_1_(RHS1)_putative_degenerate_interrupted	-3.46617	6.27e-09	4.9e-09	3.25e-08	3.14419	1	1	http://tritrypdb.org/gene/TcCLB.508285.50
TcCLB.507105.50	hypothetical_protein	-3.46217	2.2e-14	1.22e-13	8.09e-13	8.28911	1	1	http://tritrypdb.org/gene/TcCLB.507105.50
TcCLB.505989.110	hypothetical_protein_conserved	-3.45105	3.57e-19	4.95e-17	3.28e-16	7.92562	1	1	http://tritrypdb.org/gene/TcCLB.505989.110
TcCLB.437545.10	3-oxo-5-alpha-steroid_4-dehydrogenase_putative3-oxo-5-alpha-steroid_4-dehydrogenase_(pseudogene)_putative	-3.44436	5.31e-16	6.91e-15	4.59e-14	8.1048	1	1	http://tritrypdb.org/gene/TcCLB.437545.10
TcCLB.510971.5	retrotransposon_hot_spot_protein_(RHS_pseudogene)_putative	-3.43235	4.96e-11	7.08e-11	4.7e-10	3.73081	1	1	http://tritrypdb.org/gene/TcCLB.510971.5
TcCLB.511069.4	transketolase_putative	-3.4081	3.6e-15	3.09e-14	2.05e-13	5.7056	1	1	http://tritrypdb.org/gene/TcCLB.511069.4
TcCLB.509591.60	phospholipid-transporting_ATPase_1-like_protein_putative	-3.39885	8.21e-09	6.2e-09	4.12e-08	2.11033	1	1	http://tritrypdb.org/gene/TcCLB.509591.60
TcCLB.508307.200	hypothetical_protein_conserved	-3.39696	4.47e-11	6.46e-11	4.29e-10	3.46904	1	1	http://tritrypdb.org/gene/TcCLB.508307.200
TcCLB.508307.190	hypothetical_protein_conserved	-3.39131	3.13e-06	1.3e-06	8.66e-06	1.77803	1	1	http://tritrypdb.org/gene/TcCLB.508307.190
TcCLB.507979.4	histone_H2A_putative	-3.38856	9.43e-14	3.78e-13	2.51e-12	4.9669	1	1	http://tritrypdb.org/gene/TcCLB.507979.4
TcCLB.503467.9	NADH-dependent_fumarate_reductase_putative	-3.3852	3.59e-12	7.73e-12	5.13e-11	4.40458	1	1	http://tritrypdb.org/gene/TcCLB.503467.9
TcCLB.509979.119	hypothetical_protein_conserved	-3.37958	1.32e-15	1.37e-14	9.11e-14	5.19033	1	1	http://tritrypdb.org/gene/TcCLB.509979.119
TcCLB.509205.120	hypothetical_protein_conserved	-3.36624	7.02e-17	1.73e-15	1.15e-14	6.5135	1	1	http://tritrypdb.org/gene/TcCLB.509205.120
TcCLB.404975.30	trans-sialidase_(pseudogene)_putative	-3.32044	1.96e-07	1.06e-07	7.01e-07	-0.0677624	1	1	http://tritrypdb.org/gene/TcCLB.404975.30
TcCLB.505843.49	2Fe-2S_iron-sulfur_cluster_binding_domain_containing_protein_putative	-3.3202	7.07e-08	4.22e-08	2.8e-07	3.46255	1	1	http://tritrypdb.org/gene/TcCLB.505843.49
TcCLB.510773.20	vacuolar-type_proton_translocating_pyrophosphatase_1	-3.3163	4.44e-17	1.28e-15	8.49e-15	9.36932	1	1	http://tritrypdb.org/gene/TcCLB.510773.20
TcCLB.506937.10	cytosolic_malate_dehydrogenase_putative	-3.28835	8.38e-16	9.78e-15	6.49e-14	6.00004	1	1	http://tritrypdb.org/gene/TcCLB.506937.10
TcCLB.506933.60	mitochondrial_RNA_binding_protein_putative	-3.28011	3.56e-15	3.06e-14	2.03e-13	6.66606	1	1	http://tritrypdb.org/gene/TcCLB.506933.60
TcCLB.505123.28	MCAK-like_kinesin_putative	-3.27805	2.2e-05	7.74e-06	5.14e-05	-1.30822	1	1	http://tritrypdb.org/gene/TcCLB.505123.28
TcCLB.510279.70	hypothetical_protein	-3.26011	2.69e-05	9.32e-06	6.19e-05	-1.49364	1	1	http://tritrypdb.org/gene/TcCLB.510279.70
TcCLB.507079.30	multidrug_resistance_protein_E_putative	-3.23343	2.86e-10	3.22e-10	2.14e-09	3.72676	1	1	http://tritrypdb.org/gene/TcCLB.507079.30
TcCLB.510773.120	hypothetical_protein	-3.22284	1.79e-06	7.84e-07	5.21e-06	1.41225	1	1	http://tritrypdb.org/gene/TcCLB.510773.120
TcCLB.509197.39	cation_transporter_putative	-3.22035	2.96e-14	1.48e-13	9.8e-13	9.30332	1	1	http://tritrypdb.org/gene/TcCLB.509197.39
TcCLB.503989.60	protein_phosphatase_2C_putative	-3.22035	1.69e-07	9.25e-08	6.14e-07	2.63634	1	1	http://tritrypdb.org/gene/TcCLB.503989.60
TcCLB.507669.60	hypothetical_protein_conserved	-3.19909	7.51e-16	9.18e-15	6.09e-14	5.97528	1	1	http://tritrypdb.org/gene/TcCLB.507669.60
TcCLB.506367.30	12-Dihydroxy-3-keto-5-methylthiopentene_dioxygenase_putative;with=GeneDB:LmjF20.0970	-3.19876	4.47e-18	2.61e-16	1.73e-15	6.71504	1	1	http://tritrypdb.org/gene/TcCLB.506367.30
TcCLB.506563.170	calpain-like_cysteine_peptidase_(pseudogene)_putative	-3.19445	7.27e-17	1.76e-15	1.17e-14	6.00801	1	1	http://tritrypdb.org/gene/TcCLB.506563.170
TcCLB.507047.150	L-galactonolactone_oxidase	-3.19429	8.7e-15	5.86e-14	3.89e-13	4.65836	1	1	http://tritrypdb.org/gene/TcCLB.507047.150
TcCLB.511431.60	hypothetical_protein_conserved	-3.18367	2.63e-06	1.11e-06	7.39e-06	1.83207	1	1	http://tritrypdb.org/gene/TcCLB.511431.60
TcCLB.510259.50	21_kDa_cyclophilin_putativePPIase_putativerotamase_putativepeptidyl-prolyl_cis-trans_isomerase_putative	-3.18362	3.96e-16	5.64e-15	3.75e-14	6.95601	1	1	http://tritrypdb.org/gene/TcCLB.510259.50
TcCLB.505843.20	60S_ribosomal_protein_L6_putative	-3.18134	5.91e-17	1.55e-15	1.03e-14	7.8156	1	1	http://tritrypdb.org/gene/TcCLB.505843.20
TcCLB.511303.34	hypothetical_protein_conserved	-3.17668	4.22e-14	1.94e-13	1.29e-12	5.26905	1	1	http://tritrypdb.org/gene/TcCLB.511303.34
TcCLB.506753.130	hypothetical_protein_conserved	-3.1712	3e-12	6.7e-12	4.45e-11	4.45683	1	1	http://tritrypdb.org/gene/TcCLB.506753.130
TcCLB.504241.80	trans-sialidase_(pseudogene)_putative	-3.15254	1.86e-11	3.07e-11	2.04e-10	4.90483	1	1	http://tritrypdb.org/gene/TcCLB.504241.80
TcCLB.509955.50	hypothetical_protein_conserved	-3.1489	4.47e-07	2.22e-07	1.48e-06	2.39366	1	1	http://tritrypdb.org/gene/TcCLB.509955.50
TcCLB.504147.120	60S_ribosomal_protein_L22_putative	-3.13776	2.86e-17	9.38e-16	6.23e-15	6.57313	1	1	http://tritrypdb.org/gene/TcCLB.504147.120
TcCLB.508647.110	hypothetical_protein_conserved	-3.10139	1.17e-14	7.39e-14	4.91e-13	6.03877	1	1	http://tritrypdb.org/gene/TcCLB.508647.110
TcCLB.510103.24	hypothetical_protein_conserved	-3.09977	1.44e-12	3.61e-12	2.4e-11	6.20424	1	1	http://tritrypdb.org/gene/TcCLB.510103.24
TcCLB.510595.4	hypothetical_protein_conserved	-3.08235	4.6e-10	4.93e-10	3.27e-09	3.9905	1	1	http://tritrypdb.org/gene/TcCLB.510595.4
TcCLB.508809.40	hypothetical_protein_conserved	-3.0809	3.02e-11	4.61e-11	3.06e-10	4.51796	1	1	http://tritrypdb.org/gene/TcCLB.508809.40
TcCLB.510073.30	pumilio/PUF_RNA_binding_protein_4_putative	-3.07241	1.78e-05	6.38e-06	4.24e-05	1.48978	1	1	http://tritrypdb.org/gene/TcCLB.510073.30
TcCLB.508039.50	dispersed_gene_family_protein_1_(DGF-1_pseudogene)_putative	-3.07083	4.53e-06	1.82e-06	1.21e-05	1.82496	1	1	http://tritrypdb.org/gene/TcCLB.508039.50
TcCLB.507689.30	glutamamyl_carboxypeptidase_putativemetallo-peptidase_clan_MH_family_M18_putative	-3.07	1.02e-10	1.34e-10	8.87e-10	8.37885	1	1	http://tritrypdb.org/gene/TcCLB.507689.30
TcCLB.510603.169	hypothetical_protein_conserved	-3.055	1.01e-07	5.83e-08	3.87e-07	3.2603	1	1	http://tritrypdb.org/gene/TcCLB.510603.169
TcCLB.506227.10	amino_acid_transporter_putative	-3.03995	3.1e-15	2.73e-14	1.81e-13	5.50619	1	1	http://tritrypdb.org/gene/TcCLB.506227.10
TcCLB.506513.200	histone_H2A_putative	-3.03263	3.41e-09	2.88e-09	1.91e-08	3.65513	1	1	http://tritrypdb.org/gene/TcCLB.506513.200
TcCLB.511135.20	hypothetical_protein_conserved	-3.03134	8.51e-18	4.19e-16	2.78e-15	7.68308	1	1	http://tritrypdb.org/gene/TcCLB.511135.20
TcCLB.506599.10	elongation_factor_1-gamma_(EF-1-gamma)_putative	-3.01837	6.3e-09	4.91e-09	3.26e-08	4.56122	1	1	http://tritrypdb.org/gene/TcCLB.506599.10
TcCLB.506401.140	hypothetical_protein_conserved	-3.01379	3.65e-10	4.01e-10	2.66e-09	2.81992	1	1	http://tritrypdb.org/gene/TcCLB.506401.140
TcCLB.510855.10	peptide_methionine_sulfoxide_reductase_putativepeptide_Met(O)_reductase_putativemethionine-S-sulfoxide_reductase_putative	-3.00601	3.89e-14	1.82e-13	1.21e-12	5.97843	1	1	http://tritrypdb.org/gene/TcCLB.510855.10
TcCLB.509767.170	hypothetical_protein_conserved	-3.00387	2.15e-19	3.79e-17	2.52e-16	8.20375	1	1	http://tritrypdb.org/gene/TcCLB.509767.170
TcCLB.462761.4	hypothetical_protein_conserved	-2.98817	4.36e-09	3.57e-09	2.37e-08	3.4162	1	1	http://tritrypdb.org/gene/TcCLB.462761.4
TcCLB.507867.100	hypothetical_protein	-2.97902	9.84e-13	2.61e-12	1.73e-11	6.23467	1	1	http://tritrypdb.org/gene/TcCLB.507867.100
TcCLB.506203.60	hypothetical_protein_conserved	-2.94878	2.5e-18	1.57e-16	1.04e-15	7.51521	1	1	http://tritrypdb.org/gene/TcCLB.506203.60
TcCLB.508647.180	hypothetical_protein_conserved	-2.94878	2.58e-14	1.34e-13	8.89e-13	5.11641	1	1	http://tritrypdb.org/gene/TcCLB.508647.180
TcCLB.507611.270	hypothetical_protein_conserved	-2.92892	6.2e-13	1.77e-12	1.18e-11	5.86495	1	1	http://tritrypdb.org/gene/TcCLB.507611.270
TcCLB.506223.40	hypothetical_protein_conserved	-2.92862	2.08e-13	7.14e-13	4.74e-12	5.19918	1	1	http://tritrypdb.org/gene/TcCLB.506223.40
TcCLB.506859.240	hypothetical_protein_conserved	-2.9175	1.57e-09	1.45e-09	9.61e-09	3.97791	1	1	http://tritrypdb.org/gene/TcCLB.506859.240
TcCLB.510739.19	cystathione_gamma_lyase_putative	-2.909	5.41e-14	2.39e-13	1.59e-12	5.00061	1	1	http://tritrypdb.org/gene/TcCLB.510739.19
TcCLB.506661.30	fatty_acid_elongase_putative	-2.8967	1.12e-18	8.84e-17	5.87e-16	8.93931	1	1	http://tritrypdb.org/gene/TcCLB.506661.30
TcCLB.509895.30	hypothetical_protein_conserved	-2.89393	9.9e-17	2.2e-15	1.46e-14	6.92751	1	1	http://tritrypdb.org/gene/TcCLB.509895.30
TcCLB.510609.70	protein_kinase_putativecdc2-related_kinase_putative	-2.87155	1.63e-15	1.63e-14	1.08e-13	6.45408	1	1	http://tritrypdb.org/gene/TcCLB.510609.70
TcCLB.511621.60	dolichyl-P-Man:GDP-Man7GlcNAc2-PP-dolichyl_alpha-16-mannosyltransferase_putative	-2.86666	2.16e-09	1.92e-09	1.28e-08	3.95292	1	1	http://tritrypdb.org/gene/TcCLB.511621.60
TcCLB.510565.11	tyrosine_aminotransferase_putative	-2.84596	1.07e-15	1.17e-14	7.8e-14	9.09831	1	1	http://tritrypdb.org/gene/TcCLB.510565.11
TcCLB.508321.11	histone_H2A_putative	-2.84356	3.89e-12	8.26e-12	5.49e-11	5.7319	1	1	http://tritrypdb.org/gene/TcCLB.508321.11
TcCLB.511395.70	hypothetical_protein_conserved	-2.84265	1.3e-12	3.3e-12	2.19e-11	5.01627	1	1	http://tritrypdb.org/gene/TcCLB.511395.70
TcCLB.505807.180	2-hydroxy-3-oxopropionate_reductase_putative	-2.84258	2.55e-15	2.28e-14	1.51e-13	6.31979	1	1	http://tritrypdb.org/gene/TcCLB.505807.180
TcCLB.510509.50	mitochondrial_RNA_binding_protein_putative	-2.8362	1.6e-13	5.84e-13	3.88e-12	5.94324	1	1	http://tritrypdb.org/gene/TcCLB.510509.50
TcCLB.506399.80	hypothetical_protein_conserved	-2.82628	2.63e-12	6.01e-12	3.99e-11	5.21174	1	1	http://tritrypdb.org/gene/TcCLB.506399.80
TcCLB.430539.10	hypothetical_protein_conserved	-2.81698	2.95e-09	2.54e-09	1.68e-08	2.82635	1	1	http://tritrypdb.org/gene/TcCLB.430539.10
TcCLB.510769.10	hypothetical_protein_conserved	-2.81251	1.58e-14	9.26e-14	6.15e-13	6.46062	1	1	http://tritrypdb.org/gene/TcCLB.510769.10
TcCLB.507669.160	hypothetical_protein_conserved	-2.80643	1.07e-17	4.87e-16	3.24e-15	7.75614	1	1	http://tritrypdb.org/gene/TcCLB.507669.160
TcCLB.506925.300	cyclophilin_aPPIaserotamasepeptidyl-prolyl_cis-trans_isomerase	-2.79716	2.3e-14	1.25e-13	8.33e-13	9.55275	1	1	http://tritrypdb.org/gene/TcCLB.506925.300
TcCLB.504077.60	hypothetical_protein_conserved_(pseudogene)	-2.79139	3.6e-10	3.96e-10	2.63e-09	3.053	1	1	http://tritrypdb.org/gene/TcCLB.504077.60
TcCLB.506047.10	hypothetical_protein_conserved_(pseudogene)	-2.7821	1.21e-12	3.1e-12	2.06e-11	4.35448	1	1	http://tritrypdb.org/gene/TcCLB.506047.10
TcCLB.506413.80	cyclophilin_putative	-2.76274	6.6e-15	4.88e-14	3.24e-13	5.452	1	1	http://tritrypdb.org/gene/TcCLB.506413.80
TcCLB.436521.9	mevalonate_kinase_putative	-2.75562	7.29e-15	5.18e-14	3.44e-13	6.61555	1	1	http://tritrypdb.org/gene/TcCLB.436521.9
TcCLB.506697.20	hypothetical_protein_conserved	-2.74872	1.33e-10	1.68e-10	1.12e-09	3.45526	1	1	http://tritrypdb.org/gene/TcCLB.506697.20
TcCLB.508387.20	methylthioadenosine_phosphorylase_putative	-2.74454	1.16e-13	4.46e-13	2.96e-12	6.61986	1	1	http://tritrypdb.org/gene/TcCLB.508387.20
TcCLB.506885.310	meiotic_recombination_protein_DMC1_putative	-2.74144	2.22e-14	1.22e-13	8.09e-13	5.16103	1	1	http://tritrypdb.org/gene/TcCLB.506885.310
TcCLB.506513.110	peptidase_t_putativeaminotripeptidase_putative	-2.73918	5.85e-14	2.54e-13	1.69e-12	5.41041	1	1	http://tritrypdb.org/gene/TcCLB.506513.110
TcCLB.509137.30	imidazolonepropionase_putative	-2.73613	2.05e-13	7.08e-13	4.7e-12	6.78416	1	1	http://tritrypdb.org/gene/TcCLB.509137.30
TcCLB.503759.30	trans-sialidase_putative	-2.72922	0.00053816	0.000150709	0.00100067	1.79076	1	1	http://tritrypdb.org/gene/TcCLB.503759.30
TcCLB.511071.50	hypothetical_protein_conserved_(pseudogene)	-2.71466	1.09e-16	2.29e-15	1.52e-14	8.29297	1	1	http://tritrypdb.org/gene/TcCLB.511071.50
TcCLB.511067.30	transketolase_putative	-2.7117	6.32e-18	3.56e-16	2.36e-15	8.7635	1	1	http://tritrypdb.org/gene/TcCLB.511067.30
TcCLB.510447.10	dispersed_gene_family_protein_1_(DGF-1)_putative	-2.70665	0.000616572	0.000170786	0.00113398	1.16961	1	1	http://tritrypdb.org/gene/TcCLB.510447.10
TcCLB.508537.5	tyrosine_aminotransferase_putative	-2.70056	7.35e-14	3.09e-13	2.05e-12	5.56505	1	1	http://tritrypdb.org/gene/TcCLB.508537.5
TcCLB.506773.44	cytochrome_b5_putative	-2.68423	4.91e-15	3.93e-14	2.61e-13	6.51451	1	1	http://tritrypdb.org/gene/TcCLB.506773.44
TcCLB.430605.40	2Fe-2S_iron-sulfur_cluster_binding_domain_containing_protein_putative	-2.68345	2.85e-13	9.43e-13	6.26e-12	5.00517	1	1	http://tritrypdb.org/gene/TcCLB.430605.40
TcCLB.508805.80	short_chain_dehydrogenase_putative	-2.68091	1.97e-13	6.9e-13	4.58e-12	5.17925	1	1	http://tritrypdb.org/gene/TcCLB.508805.80
TcCLB.511529.50	hypothetical_protein_conserved	-2.67824	4.3e-10	4.65e-10	3.09e-09	4.53021	1	1	http://tritrypdb.org/gene/TcCLB.511529.50
TcCLB.508719.30	hypothetical_protein_conserved	-2.67597	4.39e-14	2.01e-13	1.34e-12	9.34029	1	1	http://tritrypdb.org/gene/TcCLB.508719.30
TcCLB.503401.11	retrotransposon_hot_spot_(RHS)_protein_putative	-2.66252	6.79e-06	2.65e-06	1.76e-05	1.68076	1	1	http://tritrypdb.org/gene/TcCLB.503401.11
TcCLB.508471.19	hypothetical_protein_conserved	-2.65538	1.25e-15	1.32e-14	8.76e-14	7.55726	1	1	http://tritrypdb.org/gene/TcCLB.508471.19
TcCLB.503393.10	amino_acid_permease_putative	-2.65373	1.64e-08	1.15e-08	7.63e-08	4.09259	1	1	http://tritrypdb.org/gene/TcCLB.503393.10
TcCLB.510493.4	hypothetical_protein_conserved	-2.65197	7.03e-05	2.28e-05	0.000151239	2.67149	1	1	http://tritrypdb.org/gene/TcCLB.510493.4
TcCLB.503419.50	RNA-binding_protein_RGGm_putative	-2.64504	1.5e-14	8.83e-14	5.86e-13	6.64971	1	1	http://tritrypdb.org/gene/TcCLB.503419.50
TcCLB.511333.10	calpain-like_cysteine_peptidase_putativecysteine_peptidase_Clan_CA_family_C2_putative	-2.64374	9.72e-06	3.67e-06	2.44e-05	3.21671	1	1	http://tritrypdb.org/gene/TcCLB.511333.10
TcCLB.507929.20	co-chaperone_GrpE_putative	-2.64348	3.76e-14	1.77e-13	1.18e-12	7.78539	1	1	http://tritrypdb.org/gene/TcCLB.507929.20
TcCLB.510861.125	hypothetical_protein_conserved	-2.64177	2.86e-12	6.45e-12	4.28e-11	5.00157	1	1	http://tritrypdb.org/gene/TcCLB.510861.125
TcCLB.466007.9	dispersed_gene_family_protein_1_(DGF-1)_putative	-2.63907	0.000632833	0.000174829	0.00116082	1.33723	1	1	http://tritrypdb.org/gene/TcCLB.466007.9
TcCLB.510311.90	quinone_oxidoreductase_putative	-2.63646	3.84e-18	2.33e-16	1.55e-15	6.94921	1	1	http://tritrypdb.org/gene/TcCLB.510311.90
TcCLB.504425.60	NADP-dependent_alcohol_hydrogenase_putative	-2.6363	2.74e-13	9.12e-13	6.06e-12	6.65106	1	1	http://tritrypdb.org/gene/TcCLB.504425.60
TcCLB.507101.20	hypothetical_protein_(pseudogene)	-2.60931	2.66e-09	2.31e-09	1.53e-08	3.32747	1	1	http://tritrypdb.org/gene/TcCLB.507101.20
TcCLB.511139.40	RNA_helicase_putative	-2.60908	2.54e-13	8.51e-13	5.65e-12	5.63095	1	1	http://tritrypdb.org/gene/TcCLB.511139.40
TcCLB.510961.40	mucin_TcMUCII_putative	-2.60019	0.000433205	0.000123266	0.000818458	1.15743	1	1	http://tritrypdb.org/gene/TcCLB.510961.40
TcCLB.510879.160	tyrosine_phosphatase_putative	-2.59649	7.34e-15	5.19e-14	3.45e-13	5.33056	1	1	http://tritrypdb.org/gene/TcCLB.510879.160
TcCLB.508323.60	centrin_putativeCa2_-binding_EF-hand_protein_putative	-2.59612	1.24e-12	3.17e-12	2.1e-11	5.92623	1	1	http://tritrypdb.org/gene/TcCLB.508323.60
TcCLB.511179.100	thioredoxin-like_protein_putative	-2.58393	1.65e-10	2.02e-10	1.34e-09	5.30977	1	1	http://tritrypdb.org/gene/TcCLB.511179.100
TcCLB.503503.30	mucin_TcMUCII_putative	-2.58258	0.000109085	3.43e-05	0.000227861	0.291453	1	1	http://tritrypdb.org/gene/TcCLB.503503.30
TcCLB.504769.140	trans-sialidase_putative	-2.56882	6.36e-05	2.08e-05	0.000137901	0.973727	1	1	http://tritrypdb.org/gene/TcCLB.504769.140
TcCLB.503959.78	hypothetical_protein_conserved	-2.56839	1.64e-12	4.05e-12	2.69e-11	5.72948	1	1	http://tritrypdb.org/gene/TcCLB.503959.78
TcCLB.510741.10	cystathione_gamma_lyase_putative	-2.56485	3.06e-13	9.87e-13	6.55e-12	5.76206	1	1	http://tritrypdb.org/gene/TcCLB.510741.10
TcCLB.508093.39	GMP_synthetase_(pseudogene)_putative	-2.55249	3.39e-11	5.07e-11	3.37e-10	4.28107	1	1	http://tritrypdb.org/gene/TcCLB.508093.39
TcCLB.507739.130	tuzin	-2.55093	5.43e-10	5.73e-10	3.81e-09	5.82102	1	1	http://tritrypdb.org/gene/TcCLB.507739.130
TcCLB.503653.60	cytochrome_b-domain_protein_putative	-2.54949	1.6e-13	5.84e-13	3.88e-12	5.39327	1	1	http://tritrypdb.org/gene/TcCLB.503653.60
TcCLB.506127.40	hypothetical_protein_conserved	-2.54763	1.53e-08	1.08e-08	7.17e-08	3.65418	1	1	http://tritrypdb.org/gene/TcCLB.506127.40
TcCLB.506931.4	hypothetical_protein_conserved	-2.54719	1.43e-12	3.59e-12	2.38e-11	5.61196	1	1	http://tritrypdb.org/gene/TcCLB.506931.4
TcCLB.510721.31	surface_protease_GP63_putative	-2.53519	1.84e-08	1.27e-08	8.44e-08	2.96519	1	1	http://tritrypdb.org/gene/TcCLB.510721.31
TcCLB.506529.595	hypothetical_protein	-2.53287	1.04e-08	7.64e-09	5.07e-08	4.11199	1	1	http://tritrypdb.org/gene/TcCLB.506529.595
TcCLB.506773.90	amino_acid_permease/transporter_putative	-2.5289	2.5e-13	8.44e-13	5.61e-12	8.20211	1	1	http://tritrypdb.org/gene/TcCLB.506773.90
TcCLB.511355.24	hypothetical_protein_conserved	-2.52693	6.5e-13	1.85e-12	1.23e-11	5.03195	1	1	http://tritrypdb.org/gene/TcCLB.511355.24
TcCLB.506625.130	hypothetical_protein_conserved	-2.52307	9.07e-06	3.45e-06	2.29e-05	2.47072	1	1	http://tritrypdb.org/gene/TcCLB.506625.130
TcCLB.510345.50	hypothetical_protein_conserved	-2.51866	6.59e-11	9.07e-11	6.02e-10	4.69117	1	1	http://tritrypdb.org/gene/TcCLB.510345.50
TcCLB.507617.9	prostaglandin_F2alpha_synthase	-2.51849	2.02e-14	1.15e-13	7.63e-13	9.62189	1	1	http://tritrypdb.org/gene/TcCLB.507617.9
TcCLB.511555.80	ribonucleoside-diphosphate_reductase_small_chain_putative	-2.51342	1.09e-09	1.05e-09	6.99e-09	6.62409	1	1	http://tritrypdb.org/gene/TcCLB.511555.80
TcCLB.507881.10	retrotransposon_hot_spot_protein_(RHS_pseudogene)_putative	-2.50945	6.43e-09	5.01e-09	3.33e-08	3.76384	1	1	http://tritrypdb.org/gene/TcCLB.507881.10
TcCLB.506945.190	cytochrome_p450-like_protein_putative	-2.49968	3.24e-14	1.58e-13	1.05e-12	6.98608	1	1	http://tritrypdb.org/gene/TcCLB.506945.190
TcCLB.509007.99	P-glycoprotein_(pseudogene)ATP-binding_cassette_(ABC)_transportermultidrug_resistance_protein_E_putative	-2.48752	2.11e-10	2.48e-10	1.65e-09	5.52994	1	1	http://tritrypdb.org/gene/TcCLB.509007.99
TcCLB.506127.20	hypothetical_protein_conserved	-2.47864	3.5e-11	5.22e-11	3.46e-10	4.2925	1	1	http://tritrypdb.org/gene/TcCLB.506127.20
TcCLB.503831.40	mitochondrial_DNA_primase_putative	-2.47564	7.98e-16	9.6e-15	6.37e-14	6.22816	1	1	http://tritrypdb.org/gene/TcCLB.503831.40
TcCLB.510749.99	aminopeptidase_P_putative	-2.47536	3.1e-12	6.86e-12	4.55e-11	5.14891	1	1	http://tritrypdb.org/gene/TcCLB.510749.99
TcCLB.506467.29	hypothetical_protein_conserved	-2.47254	1.34e-13	5.09e-13	3.38e-12	6.06859	1	1	http://tritrypdb.org/gene/TcCLB.506467.29
TcCLB.504229.110	amino_acid_transporter_putative	-2.46492	5.55e-10	5.85e-10	3.88e-09	4.84528	1	1	http://tritrypdb.org/gene/TcCLB.504229.110
TcCLB.511867.140	acyl_carrier_protein_mitochondrial_precursor_putative	-2.46455	4.59e-14	2.07e-13	1.38e-12	6.47438	1	1	http://tritrypdb.org/gene/TcCLB.511867.140
TcCLB.461927.9	adenosine_monophosphate_deaminase_putative	-2.45579	1.17e-08	8.49e-09	5.63e-08	3.55446	1	1	http://tritrypdb.org/gene/TcCLB.461927.9
TcCLB.508781.10	structural_maintenance_of_chromosome_protein_4_(pseudogene)_putative	-2.45491	5.46e-11	7.68e-11	5.1e-10	4.43377	1	1	http://tritrypdb.org/gene/TcCLB.508781.10
TcCLB.508541.160	hypothetical_protein_conserved	-2.4459	9.08e-11	1.2e-10	7.99e-10	4.11776	1	1	http://tritrypdb.org/gene/TcCLB.508541.160
TcCLB.508083.10	hypothetical_protein_conserved	-2.44517	8.23e-14	3.37e-13	2.24e-12	6.44986	1	1	http://tritrypdb.org/gene/TcCLB.508083.10
TcCLB.510091.110	hypothetical_protein_conserved	-2.4416	4.44e-11	6.43e-11	4.27e-10	6.31469	1	1	http://tritrypdb.org/gene/TcCLB.510091.110
TcCLB.503717.15	hypothetical_protein	-2.43165	0.00387473	0.000938347	0.00623041	0.651307	1	1	http://tritrypdb.org/gene/TcCLB.503717.15
TcCLB.511039.10	kinetoplast_DNA-associated_protein_putative	-2.41744	1.05e-12	2.76e-12	1.83e-11	6.27888	1	1	http://tritrypdb.org/gene/TcCLB.511039.10
TcCLB.506773.50	nucleoside_transporter-like_putative	-2.41352	2.67e-12	6.09e-12	4.04e-11	6.59806	1	1	http://tritrypdb.org/gene/TcCLB.506773.50
TcCLB.506925.14	hypothetical_protein_conserved	-2.41346	2.91e-15	2.59e-14	1.72e-13	6.38413	1	1	http://tritrypdb.org/gene/TcCLB.506925.14
TcCLB.507603.70	hypothetical_protein_conserved	-2.41086	2.59e-10	2.95e-10	1.96e-09	4.57462	1	1	http://tritrypdb.org/gene/TcCLB.507603.70
TcCLB.506183.9	pyruvate_dehydrogenase_(lipoamide)_kinase_putative	-2.39834	8.59e-12	1.61e-11	1.07e-10	5.07951	1	1	http://tritrypdb.org/gene/TcCLB.506183.9
TcCLB.504203.40	hypothetical_protein_conserved	-2.39008	1.18e-14	7.42e-14	4.92e-13	7.75918	1	1	http://tritrypdb.org/gene/TcCLB.504203.40
TcCLB.506529.370	hypothetical_protein	-2.38912	9.31e-09	6.94e-09	4.61e-08	3.21949	1	1	http://tritrypdb.org/gene/TcCLB.506529.370
TcCLB.510013.50	trans-sialidase_putative	-2.38667	2.94e-05	1.01e-05	6.74e-05	2.20434	1	1	http://tritrypdb.org/gene/TcCLB.510013.50
TcCLB.506363.80	aminoacylase_putativeN-acyl-L-amino_acid_amidohydrolase_putative	-2.3828	1.63e-10	2e-10	1.32e-09	3.88227	1	1	http://tritrypdb.org/gene/TcCLB.506363.80
TcCLB.487507.10	tryparedoxin_peroxidase_putative	-2.37532	1.34e-08	9.55e-09	6.34e-08	7.82227	1	1	http://tritrypdb.org/gene/TcCLB.487507.10
TcCLB.511467.13	hypothetical_protein_conserved	-2.37291	4.94e-05	1.64e-05	0.000109009	2.4205	1	1	http://tritrypdb.org/gene/TcCLB.511467.13
TcCLB.506795.80	proline_racemaseB-cell_mitogen_precursor_putative	-2.37153	2.52e-10	2.9e-10	1.92e-09	6.35696	1	1	http://tritrypdb.org/gene/TcCLB.506795.80
TcCLB.506885.410	hypothetical_protein_conserved	-2.36864	2.08e-13	7.14e-13	4.74e-12	5.86587	1	1	http://tritrypdb.org/gene/TcCLB.506885.410
TcCLB.507143.80	hypothetical_protein_conserved	-2.36418	7.1e-11	9.71e-11	6.45e-10	4.42399	1	1	http://tritrypdb.org/gene/TcCLB.507143.80
TcCLB.506753.150	hypothetical_protein_conserved	-2.36275	3.9e-11	5.75e-11	3.82e-10	4.23612	1	1	http://tritrypdb.org/gene/TcCLB.506753.150
TcCLB.511335.9	calpain-like_cysteine_peptidase_putative	-2.35693	8.77e-08	5.13e-08	3.41e-07	3.64288	1	1	http://tritrypdb.org/gene/TcCLB.511335.9
TcCLB.508975.4	hypothetical_protein_conserved	-2.35541	4.04e-12	8.52e-12	5.66e-11	4.69864	1	1	http://tritrypdb.org/gene/TcCLB.508975.4
TcCLB.504147.160	ADP-ribosylation_factor-like_protein_putative	-2.34001	6.68e-13	1.89e-12	1.25e-11	5.42491	1	1	http://tritrypdb.org/gene/TcCLB.504147.160
TcCLB.506623.30	hypothetical_protein	-2.33545	6.66e-06	2.6e-06	1.73e-05	2.80235	1	1	http://tritrypdb.org/gene/TcCLB.506623.30
TcCLB.507737.40	hypothetical_protein_conserved	-2.33441	1.38e-07	7.73e-08	5.13e-07	2.79996	1	1	http://tritrypdb.org/gene/TcCLB.507737.40
TcCLB.506411.10	thimet_oligopeptidase_putativemetallo-peptidase_clan_MA(E)_family_M3_putative	-2.33382	1.87e-13	6.6e-13	4.38e-12	8.44657	1	1	http://tritrypdb.org/gene/TcCLB.506411.10
TcCLB.511111.50	ubiquitin-conjugating_enzyme_putative	-2.33299	4.03e-08	2.56e-08	1.7e-07	4.17441	1	1	http://tritrypdb.org/gene/TcCLB.511111.50
TcCLB.508647.174	hypothetical_protein_conserved	-2.33201	1.33e-09	1.26e-09	8.36e-09	4.86107	1	1	http://tritrypdb.org/gene/TcCLB.508647.174
TcCLB.506289.9	DNA_ligase_putative	-2.33127	9.84e-14	3.9e-13	2.59e-12	6.26693	1	1	http://tritrypdb.org/gene/TcCLB.506289.9
TcCLB.507993.230	hypothetical_protein_conserved_(pseudogene)	-2.33075	0.000863329	0.000233072	0.00154754	1.54947	1	1	http://tritrypdb.org/gene/TcCLB.507993.230
TcCLB.511529.80	kinetoplast-associated_protein_3	-2.3261	1.62e-11	2.75e-11	1.82e-10	5.95973	1	1	http://tritrypdb.org/gene/TcCLB.511529.80
TcCLB.438147.18	hypothetical_protein_conserved	-2.32337	8.65e-10	8.58e-10	5.7e-09	4.36586	1	1	http://tritrypdb.org/gene/TcCLB.438147.18
TcCLB.508387.170	double-strand-break_repair_protein_rad21_homolog_putative	-2.32299	5.64e-15	4.34e-14	2.88e-13	6.65237	1	1	http://tritrypdb.org/gene/TcCLB.508387.170
TcCLB.507009.40	galactokinase_putative	-2.32255	3.02e-13	9.78e-13	6.5e-12	5.30019	1	1	http://tritrypdb.org/gene/TcCLB.507009.40
TcCLB.507671.30	25_kDa_translation_elongation_factor_1-beta	-2.32097	7.04e-18	3.83e-16	2.54e-15	8.44729	1	1	http://tritrypdb.org/gene/TcCLB.507671.30
TcCLB.511733.130	chaperonin_HSP60_putative	-2.32049	2.72e-09	2.36e-09	1.57e-08	4.5944	1	1	http://tritrypdb.org/gene/TcCLB.511733.130
TcCLB.503449.14	hypothetical_protein_conserved	-2.31639	8.2e-15	5.6e-14	3.72e-13	6.14216	1	1	http://tritrypdb.org/gene/TcCLB.503449.14
TcCLB.511365.80	mitochondrial_carrier_protein_putative	-2.31077	1.97e-13	6.88e-13	4.57e-12	5.13901	1	1	http://tritrypdb.org/gene/TcCLB.511365.80
TcCLB.507689.50	glutamamyl_carboxypeptidase_putativemetallo-peptidase_clan_MH_family_M18_putative	-2.30321	9.96e-09	7.34e-09	4.87e-08	8.25089	1	1	http://tritrypdb.org/gene/TcCLB.507689.50
TcCLB.401661.10	trans-sialidase_(pseudogene)_putative	-2.30301	2e-13	6.98e-13	4.64e-12	5.00965	1	1	http://tritrypdb.org/gene/TcCLB.401661.10
TcCLB.506183.80	hypothetical_protein	-2.30199	2.86e-07	1.48e-07	9.84e-07	3.1462	1	1	http://tritrypdb.org/gene/TcCLB.506183.80
TcCLB.504769.80	hypothetical_protein_conserved	-2.29735	1.12e-14	7.16e-14	4.75e-13	6.81282	1	1	http://tritrypdb.org/gene/TcCLB.504769.80
TcCLB.506147.9	prostaglandin_F2alpha_synthasedehydrogenase_putativeNADH:flavin_oxidoreductase/NADH_oxidase_putative	-2.29698	5.21e-13	1.52e-12	1.01e-11	8.78012	1	1	http://tritrypdb.org/gene/TcCLB.506147.9
TcCLB.506399.89	succinate_dehydrogenase_flavoprotein_putative	-2.29514	8.51e-13	2.3e-12	1.53e-11	6.20099	1	1	http://tritrypdb.org/gene/TcCLB.506399.89
TcCLB.510143.24	Hsc70-interacting_protein_(Hip)_putative	-2.27901	7.65e-17	1.78e-15	1.18e-14	8.34718	1	1	http://tritrypdb.org/gene/TcCLB.510143.24
TcCLB.508811.40	hypothetical_protein	-2.27055	7.69e-09	5.85e-09	3.89e-08	4.93849	1	1	http://tritrypdb.org/gene/TcCLB.508811.40
TcCLB.504769.89	hypothetical_protein_conserved	-2.27019	7.9e-09	6e-09	3.99e-08	4.06327	1	1	http://tritrypdb.org/gene/TcCLB.504769.89
TcCLB.510863.30	hypothetical_protein_conserved	-2.26304	6.17e-10	6.4e-10	4.25e-09	4.69447	1	1	http://tritrypdb.org/gene/TcCLB.510863.30
TcCLB.482471.19	ATP-dependent_DEAD/H_RNA_helicase_putative	-2.25814	1.76e-13	6.29e-13	4.18e-12	6.67608	1	1	http://tritrypdb.org/gene/TcCLB.482471.19
TcCLB.510105.20	ribosomal_RNA_processing_protein_41A_putative3'_exoribonuclease_putativeexosome_complex_exonuclease_putative	-2.25733	7.86e-14	3.23e-13	2.15e-12	6.06754	1	1	http://tritrypdb.org/gene/TcCLB.510105.20
TcCLB.509157.279	chaperonin_HSP60_mitochondrial_precursor_putative	-2.25702	5.15e-11	7.29e-11	4.84e-10	4.73098	1	1	http://tritrypdb.org/gene/TcCLB.509157.279
TcCLB.503893.30	hypothetical_protein_conserved	-2.2546	2.04e-13	7.07e-13	4.69e-12	6.21525	1	1	http://tritrypdb.org/gene/TcCLB.503893.30
TcCLB.510565.30	cytochrome_c_oxidase_subunit_V_putative	-2.25367	1.72e-15	1.67e-14	1.11e-13	7.68904	1	1	http://tritrypdb.org/gene/TcCLB.510565.30
TcCLB.510517.40	hypothetical_protein	-2.24688	1.37e-13	5.15e-13	3.42e-12	5.11695	1	1	http://tritrypdb.org/gene/TcCLB.510517.40
TcCLB.511745.10	heat_shock_70_kDa_protein_mitochondrial_precursor_putative	-2.23356	1.96e-09	1.76e-09	1.17e-08	9.12181	1	1	http://tritrypdb.org/gene/TcCLB.511745.10
TcCLB.511559.10	hypothetical_protein_conserved	-2.22614	0.000214092	6.4e-05	0.000425056	2.5408	1	1	http://tritrypdb.org/gene/TcCLB.511559.10
TcCLB.509707.20	hypothetical_protein_conserved	-2.22534	1.22e-11	2.15e-11	1.43e-10	5.32605	1	1	http://tritrypdb.org/gene/TcCLB.509707.20
TcCLB.506203.120	hypothetical_protein_conserved	-2.22433	5.24e-14	2.33e-13	1.55e-12	7.61199	1	1	http://tritrypdb.org/gene/TcCLB.506203.120
TcCLB.503449.5	hypothetical_protein_conserved	-2.22269	5.3e-06	2.1e-06	1.4e-05	2.24115	1	1	http://tritrypdb.org/gene/TcCLB.503449.5
TcCLB.509977.61	surface_protease_GP63_(pseudogene)_putative	-2.21923	7.16e-07	3.41e-07	2.27e-06	2.80024	1	1	http://tritrypdb.org/gene/TcCLB.509977.61
TcCLB.503893.100	hypothetical_protein_conserved	-2.21682	1.01e-09	9.77e-10	6.49e-09	4.43095	1	1	http://tritrypdb.org/gene/TcCLB.503893.100
TcCLB.507641.300	chaperonin_HSP60_mitochondrial_precursorgroELproteinheat_shock_protein_60	-2.21615	0.000649233	0.00017892	0.00118799	5.71833	1	1	http://tritrypdb.org/gene/TcCLB.507641.300
TcCLB.510773.110	hypothetical_protein_conserved	-2.21581	1.98e-09	1.77e-09	1.18e-08	4.20928	1	1	http://tritrypdb.org/gene/TcCLB.510773.110
TcCLB.504035.84	succinate_dehydrogenase_subunit	-2.20746	5.12e-13	1.51e-12	1e-11	5.77139	1	1	http://tritrypdb.org/gene/TcCLB.504035.84
TcCLB.503683.11	RNA-binding_protein_putative	-2.20446	5.08e-06	2.03e-06	1.35e-05	2.61834	1	1	http://tritrypdb.org/gene/TcCLB.503683.11
TcCLB.511577.144	hypothetical_protein_conserved	-2.20247	7.49e-12	1.43e-11	9.52e-11	5.28013	1	1	http://tritrypdb.org/gene/TcCLB.511577.144
TcCLB.436535.19	Glucose-6-phosphate_dehydrogenase_putative	-2.19967	2.38e-07	1.25e-07	8.32e-07	4.1296	1	1	http://tritrypdb.org/gene/TcCLB.436535.19
TcCLB.508515.20	translation_factor_sui1_putative	-2.19933	9.66e-14	3.84e-13	2.55e-12	6.54376	1	1	http://tritrypdb.org/gene/TcCLB.508515.20
TcCLB.510205.80	mucin-associated_surface_protein_(MASP)_putative	-2.19835	0.00206145	0.000522764	0.00347103	-0.57581	1	1	http://tritrypdb.org/gene/TcCLB.510205.80
TcCLB.511695.10	hypothetical_protein	-2.19291	5.52e-05	1.82e-05	0.000120713	2.46353	1	1	http://tritrypdb.org/gene/TcCLB.511695.10
TcCLB.509589.20	squalene_monooxygenase_putative	-2.19277	2.39e-11	3.82e-11	2.54e-10	8.57276	1	1	http://tritrypdb.org/gene/TcCLB.509589.20
TcCLB.508373.29	orotidine-5-phosphate_decarboxylase/orotate_phosphoribosyltransferase_putative	-2.1926	3.52e-14	1.68e-13	1.12e-12	5.84224	1	1	http://tritrypdb.org/gene/TcCLB.508373.29
TcCLB.508549.20	hypothetical_protein_conserved	-2.19246	6.08e-14	2.62e-13	1.74e-12	6.55574	1	1	http://tritrypdb.org/gene/TcCLB.508549.20
TcCLB.509973.40	hypothetical_protein	-2.19216	9.17e-05	2.92e-05	0.000194105	1.59367	1	1	http://tritrypdb.org/gene/TcCLB.509973.40
TcCLB.479517.50	surface_protease_GP63_putative	-2.1885	4.91e-06	1.96e-06	1.3e-05	3.41984	1	1	http://tritrypdb.org/gene/TcCLB.479517.50
TcCLB.511595.10	trans-sialidase_(pseudogene)_putative	-2.18766	0.00188142	0.000479968	0.00318687	2.272	1	1	http://tritrypdb.org/gene/TcCLB.511595.10
TcCLB.506801.110	hypothetical_protein_conserved	-2.18681	6.38e-13	1.82e-12	1.21e-11	5.67015	1	1	http://tritrypdb.org/gene/TcCLB.506801.110
TcCLB.462761.16	hypothetical_protein_conserved	-2.1861	3.66e-15	3.1e-14	2.06e-13	5.76186	1	1	http://tritrypdb.org/gene/TcCLB.462761.16
TcCLB.505843.10	glutamate_dehydrogenase_putative	-2.18546	5.75e-12	1.15e-11	7.61e-11	6.56818	1	1	http://tritrypdb.org/gene/TcCLB.505843.10
TcCLB.504765.20	hypothetical_protein_conserved	-2.17954	0.000321253	9.34e-05	0.000620161	1.88944	1	1	http://tritrypdb.org/gene/TcCLB.504765.20
TcCLB.510879.170	hypothetical_protein_conserved	-2.17715	1.23e-08	8.87e-09	5.89e-08	3.74323	1	1	http://tritrypdb.org/gene/TcCLB.510879.170
TcCLB.506677.39	Mitochondrial_elongation_factor_G_putative	-2.17561	2.72e-11	4.23e-11	2.81e-10	5.77926	1	1	http://tritrypdb.org/gene/TcCLB.506677.39
TcCLB.510565.20	fatty_acid_desaturase_putativesphingolipid_delta_4_desaturase_putative	-2.17451	9.55e-12	1.76e-11	1.17e-10	6.8559	1	1	http://tritrypdb.org/gene/TcCLB.510565.20
TcCLB.507993.330	mevalonate-diphosphate_decarboxylase_putative	-2.17419	1.02e-15	1.13e-14	7.5e-14	6.88003	1	1	http://tritrypdb.org/gene/TcCLB.507993.330
TcCLB.511133.20	thymidine_kinase_putative	-2.1724	1.23e-09	1.17e-09	7.76e-09	4.99649	1	1	http://tritrypdb.org/gene/TcCLB.511133.20
TcCLB.506401.320	60S_ribosomal_protein_L7a_putative	-2.17089	1.67e-15	1.65e-14	1.1e-13	10.351	1	1	http://tritrypdb.org/gene/TcCLB.506401.320
TcCLB.504127.10	surface_protease_GP63_(pseudogene)_putative	-2.16511	1.57e-05	5.69e-06	3.78e-05	3.11921	1	1	http://tritrypdb.org/gene/TcCLB.504127.10
TcCLB.509965.429	hypothetical_protein_conserved	-2.16132	4.33e-08	2.74e-08	1.82e-07	4.31698	1	1	http://tritrypdb.org/gene/TcCLB.509965.429
TcCLB.510879.180	hypothetical_protein	-2.15882	1.7e-11	2.87e-11	1.9e-10	5.35903	1	1	http://tritrypdb.org/gene/TcCLB.510879.180
TcCLB.503577.9	delta-1-pyrroline-5-carboxylate_dehydrogenase_(pseudogene)_putative	-2.15755	8.32e-16	9.78e-15	6.49e-14	5.95479	1	1	http://tritrypdb.org/gene/TcCLB.503577.9
TcCLB.511589.200	S-adenosylhomocysteine_hydrolase_putative	-2.15649	2.07e-13	7.14e-13	4.74e-12	9.19182	1	1	http://tritrypdb.org/gene/TcCLB.511589.200
TcCLB.506857.20	pyrroline-5-carboxylate_reductase_putative	-2.15603	6.75e-14	2.86e-13	1.9e-12	6.87591	1	1	http://tritrypdb.org/gene/TcCLB.506857.20
TcCLB.511051.10	hypothetical_protein	-2.15592	8.81e-08	5.15e-08	3.42e-07	3.62112	1	1	http://tritrypdb.org/gene/TcCLB.511051.10
TcCLB.507669.200	hypothetical_protein_conserved	-2.14956	7.18e-12	1.39e-11	9.23e-11	5.90234	1	1	http://tritrypdb.org/gene/TcCLB.507669.200
TcCLB.511325.50	amino_acid_permease_putative	-2.14732	2.24e-08	1.52e-08	1.01e-07	4.22283	1	1	http://tritrypdb.org/gene/TcCLB.511325.50
TcCLB.505807.60	hypothetical_protein_conserved	-2.1471	5.53e-11	7.76e-11	5.15e-10	6.61196	1	1	http://tritrypdb.org/gene/TcCLB.505807.60
TcCLB.509279.10	hypothetical_protein_conserved	-2.14322	3.14e-07	1.61e-07	1.07e-06	4.2574	1	1	http://tritrypdb.org/gene/TcCLB.509279.10
TcCLB.503487.30	hypothetical_protein_conserved	-2.13571	8.42e-12	1.59e-11	1.05e-10	5.22562	1	1	http://tritrypdb.org/gene/TcCLB.503487.30
TcCLB.506743.110	protein_tyrosine_phosphatase_putative	-2.1312	5.04e-11	7.17e-11	4.76e-10	5.61443	1	1	http://tritrypdb.org/gene/TcCLB.506743.110
TcCLB.511589.60	hypothetical_protein_conserved	-2.13051	1.42e-07	7.9e-08	5.25e-07	4.41342	1	1	http://tritrypdb.org/gene/TcCLB.511589.60
TcCLB.506945.290	ribosomal_protein_L15_putative	-2.12618	1.1e-11	1.98e-11	1.32e-10	6.54677	1	1	http://tritrypdb.org/gene/TcCLB.506945.290
TcCLB.509895.110	hypothetical_protein_conserved	-2.12514	1.02e-05	3.82e-06	2.54e-05	2.38623	1	1	http://tritrypdb.org/gene/TcCLB.509895.110
TcCLB.506517.40	hypothetical_protein	-2.12496	4.87e-06	1.95e-06	1.29e-05	3.49712	1	1	http://tritrypdb.org/gene/TcCLB.506517.40
TcCLB.503905.50	hypothetical_protein_conserved	-2.12485	2.02e-09	1.81e-09	1.2e-08	4.13367	1	1	http://tritrypdb.org/gene/TcCLB.503905.50
TcCLB.511469.70	prohibitin_putative	-2.11683	3.73e-14	1.76e-13	1.17e-12	6.68706	1	1	http://tritrypdb.org/gene/TcCLB.511469.70
TcCLB.509965.330	hypothetical_protein_conserved	-2.11066	5.07e-16	6.65e-15	4.42e-14	7.76674	1	1	http://tritrypdb.org/gene/TcCLB.509965.330
TcCLB.510861.140	serine/threonine_protein_kinase_putativeprotein_kinase_putative	-2.10755	2.38e-12	5.56e-12	3.69e-11	6.28014	1	1	http://tritrypdb.org/gene/TcCLB.510861.140
TcCLB.508277.140	phosphomevalonate_kinase_protein_putative	-2.10742	6.96e-14	2.94e-13	1.95e-12	6.94557	1	1	http://tritrypdb.org/gene/TcCLB.508277.140
TcCLB.510515.60	cytosolic_leucyl_aminopeptidase_putativemetallo-peptidase_Clan_MF_Family_M17_putative	-2.10677	4.69e-14	2.11e-13	1.4e-12	6.9932	1	1	http://tritrypdb.org/gene/TcCLB.510515.60
TcCLB.508605.31	trans-sialidase_(pseudogene)_putative	-2.10604	4.05e-09	3.35e-09	2.22e-08	4.32844	1	1	http://tritrypdb.org/gene/TcCLB.508605.31
TcCLB.511325.25	amino_acid_transporter_putative	-2.10264	3.06e-09	2.62e-09	1.74e-08	3.90421	1	1	http://tritrypdb.org/gene/TcCLB.511325.25
TcCLB.506945.160	S-adenosylmethionine_synthetase_putative	-2.09595	1.45e-16	2.81e-15	1.87e-14	8.61651	1	1	http://tritrypdb.org/gene/TcCLB.506945.160
TcCLB.508781.110	2-oxoisovalerate_dehydrogenase_alpha_subunit_putative	-2.09589	2.03e-14	1.15e-13	7.63e-13	6.81122	1	1	http://tritrypdb.org/gene/TcCLB.508781.110
TcCLB.507737.10	hypothetical_protein_conserved	-2.09508	1.87e-05	6.67e-06	4.43e-05	2.93129	1	1	http://tritrypdb.org/gene/TcCLB.507737.10
TcCLB.508535.50	tyrosine_aminotransferase	-2.09281	1.51e-16	2.89e-15	1.92e-14	8.45058	1	1	http://tritrypdb.org/gene/TcCLB.508535.50
TcCLB.506717.200	hypothetical_protein_conserved	-2.09173	3.26e-10	3.62e-10	2.4e-09	5.47682	1	1	http://tritrypdb.org/gene/TcCLB.506717.200
TcCLB.508567.60	hypothetical_protein	-2.08466	5.48e-15	4.26e-14	2.83e-13	6.11146	1	1	http://tritrypdb.org/gene/TcCLB.508567.60
TcCLB.506543.50	hypothetical_protein_conserved	-2.08441	2.4e-10	2.77e-10	1.84e-09	4.85676	1	1	http://tritrypdb.org/gene/TcCLB.506543.50
TcCLB.506811.160	R27-2_protein_putative	-2.08226	1.1e-11	1.99e-11	1.32e-10	7.56492	1	1	http://tritrypdb.org/gene/TcCLB.506811.160
TcCLB.506579.129	hypothetical_protein_conserved	-2.07601	7.57e-08	4.49e-08	2.98e-07	4.15224	1	1	http://tritrypdb.org/gene/TcCLB.506579.129
TcCLB.511867.150	hypothetical_protein_conserved	-2.07354	5.15e-10	5.47e-10	3.63e-09	5.14178	1	1	http://tritrypdb.org/gene/TcCLB.511867.150
TcCLB.509169.30	hypothetical_protein_conserved	-2.07284	5.57e-12	1.12e-11	7.41e-11	4.87323	1	1	http://tritrypdb.org/gene/TcCLB.509169.30
TcCLB.506213.50	prostaglandin_F_synthase_(pseudogene)_putativealdo/keto_reductase_(pseudogene)_putative	-2.07036	3.1e-11	4.71e-11	3.13e-10	7.66051	1	1	http://tritrypdb.org/gene/TcCLB.506213.50
TcCLB.511395.14	hypothetical_protein_conserved	-2.06818	3.36e-11	5.04e-11	3.35e-10	4.69925	1	1	http://tritrypdb.org/gene/TcCLB.511395.14
TcCLB.508387.60	hypothetical_protein_conserved	-2.06714	1.26e-10	1.6e-10	1.07e-09	5.47467	1	1	http://tritrypdb.org/gene/TcCLB.508387.60
TcCLB.507709.90	sterol_C-24_reductase_putative	-2.0667	2.29e-09	2.01e-09	1.34e-08	5.9155	1	1	http://tritrypdb.org/gene/TcCLB.507709.90
TcCLB.507091.10	hypothetical_protein_conserved	-2.06489	4.25e-09	3.49e-09	2.32e-08	4.85902	1	1	http://tritrypdb.org/gene/TcCLB.507091.10
TcCLB.505807.209	hypothetical_protein_conserved	-2.06426	6.95e-09	5.35e-09	3.55e-08	4.73274	1	1	http://tritrypdb.org/gene/TcCLB.505807.209
TcCLB.506885.430	lipoic_acid_containing_carrier_protein_putative;with=GeneDB:LinJ35_V3.4790	-2.06338	2.69e-13	8.97e-13	5.95e-12	5.63777	1	1	http://tritrypdb.org/gene/TcCLB.506885.430
TcCLB.506755.230	hypothetical_protein_conserved	-2.06124	6.65e-14	2.84e-13	1.89e-12	5.60088	1	1	http://tritrypdb.org/gene/TcCLB.506755.230
TcCLB.511051.59	hypothetical_protein_conserved	-2.06087	1.67e-14	9.7e-14	6.44e-13	7.00592	1	1	http://tritrypdb.org/gene/TcCLB.511051.59
TcCLB.510879.50	regulatory_subunit_of_protein_kinase_a-like_protein_putative	-2.06007	2.41e-14	1.29e-13	8.55e-13	8.56343	1	1	http://tritrypdb.org/gene/TcCLB.510879.50
TcCLB.510747.10	hypothetical_protein_conserved	-2.05961	1.73e-13	6.24e-13	4.14e-12	5.09537	1	1	http://tritrypdb.org/gene/TcCLB.510747.10
TcCLB.506797.70	lysophospholipase_putative	-2.05895	1.02e-16	2.22e-15	1.48e-14	7.28074	1	1	http://tritrypdb.org/gene/TcCLB.506797.70
TcCLB.503579.70	ATPase_subunit_9_putative	-2.05636	2.29e-12	5.39e-12	3.58e-11	7.56201	1	1	http://tritrypdb.org/gene/TcCLB.503579.70
TcCLB.506925.400	hypothetical_protein_conserved	-2.04856	3e-12	6.7e-12	4.45e-11	5.86157	1	1	http://tritrypdb.org/gene/TcCLB.506925.400
TcCLB.506797.60	hypothetical_protein_conserved	-2.04835	9.7e-15	6.42e-14	4.26e-13	6.00538	1	1	http://tritrypdb.org/gene/TcCLB.506797.60
TcCLB.510521.10	NADH-cytochrome_b5_reductase_(pseudogene)_putative	-2.04251	2.64e-11	4.12e-11	2.74e-10	6.33337	1	1	http://tritrypdb.org/gene/TcCLB.510521.10
TcCLB.511729.40	60S_ribosomal_protein_L9_putative	-2.04097	6.92e-08	4.14e-08	2.75e-07	7.65982	1	1	http://tritrypdb.org/gene/TcCLB.511729.40
TcCLB.511211.30	hypothetical_protein	-2.0406	1.7e-10	2.07e-10	1.37e-09	4.70832	1	1	http://tritrypdb.org/gene/TcCLB.511211.30
TcCLB.509199.24	ribose_5-phosphate_isomerase_putative	-2.04051	1.07e-15	1.17e-14	7.8e-14	6.37125	1	1	http://tritrypdb.org/gene/TcCLB.509199.24
TcCLB.507091.50	aspartate_carbamoyltransferase_putative	-2.0392	5.07e-11	7.2e-11	4.78e-10	5.77892	1	1	http://tritrypdb.org/gene/TcCLB.507091.50
TcCLB.508955.20	hypothetical_protein_conserved	-2.03675	1.2e-13	4.61e-13	3.06e-12	7.8128	1	1	http://tritrypdb.org/gene/TcCLB.508955.20
TcCLB.510529.39	hypothetical_protein_conserved	-2.03589	8.68e-11	1.16e-10	7.68e-10	4.19178	1	1	http://tritrypdb.org/gene/TcCLB.510529.39
TcCLB.509231.10	cytochrome_P450_putative	-2.03317	8.23e-13	2.24e-12	1.49e-11	6.90837	1	1	http://tritrypdb.org/gene/TcCLB.509231.10
TcCLB.507099.80	ABC_transporter_putative	-2.03095	3.92e-11	5.76e-11	3.82e-10	5.77576	1	1	http://tritrypdb.org/gene/TcCLB.507099.80
TcCLB.506691.64	cytochrome_c_oxidase_copper_chaperone_putative	-2.03061	6.38e-10	6.58e-10	4.37e-09	4.74586	1	1	http://tritrypdb.org/gene/TcCLB.506691.64
TcCLB.505555.61	cytoplasmic_l-asparaginase_i-like_protein_putative	-2.02955	5.68e-11	7.92e-11	5.26e-10	5.06578	1	1	http://tritrypdb.org/gene/TcCLB.505555.61
TcCLB.507831.70	pyruvate_dehydrogenase_E1_component_alpha_subunit_putative	-2.02683	1.07e-11	1.93e-11	1.28e-10	8.01587	1	1	http://tritrypdb.org/gene/TcCLB.507831.70
TcCLB.509551.64	small_nuclear_ribonucleoprotein_Sm-F_putative	-2.02471	9.68e-09	7.17e-09	4.76e-08	4.68681	1	1	http://tritrypdb.org/gene/TcCLB.509551.64
TcCLB.510073.75	hypothetical_protein_conserved	-2.02442	0.00182347	0.000466239	0.00309572	1.5034	1	1	http://tritrypdb.org/gene/TcCLB.510073.75
TcCLB.509445.39	glutamate_dehydrogenase_putative	-2.02274	5.84e-12	1.15e-11	7.66e-11	7.3911	1	1	http://tritrypdb.org/gene/TcCLB.509445.39
TcCLB.507237.110	elongation_factor_1-gamma_(EF-1-gamma)_putative	-2.01752	0.00331841	0.000812741	0.00539641	0.127314	1	1	http://tritrypdb.org/gene/TcCLB.507237.110
TcCLB.505945.10	PIF1_helicase-like_protein_putativeDNA_repair_and_recombination_protein_mitochondrial_precursor_putative	-2.01718	2.54e-12	5.82e-12	3.86e-11	6.75924	1	1	http://tritrypdb.org/gene/TcCLB.505945.10
TcCLB.504103.90	hypothetical_protein_conserved	-2.01429	9.39e-10	9.2e-10	6.11e-09	5.05533	1	1	http://tritrypdb.org/gene/TcCLB.504103.90
TcCLB.504137.100	hypothetical_protein_conserved	-2.01348	4.94e-12	1.01e-11	6.72e-11	5.57417	1	1	http://tritrypdb.org/gene/TcCLB.504137.100
TcCLB.507485.80	hypothetical_protein_conserved	-2.01304	1.16e-09	1.11e-09	7.35e-09	4.91825	1	1	http://tritrypdb.org/gene/TcCLB.507485.80
TcCLB.506287.209	DNA_ligase_putative	-2.01242	1.11e-13	4.33e-13	2.87e-12	6.58774	1	1	http://tritrypdb.org/gene/TcCLB.506287.209
TcCLB.511127.80	hypothetical_protein_conserved	-2.01106	1.06e-14	6.83e-14	4.54e-13	5.66571	1	1	http://tritrypdb.org/gene/TcCLB.511127.80
TcCLB.506865.2	nucleoside_phosphorylase_putative	-2.00754	1.05e-13	4.12e-13	2.73e-12	6.54102	1	1	http://tritrypdb.org/gene/TcCLB.506865.2
TcCLB.507959.323	syntaxin_binding_protein_(pseudogene)_putative	-2.00692	1.05e-05	3.93e-06	2.61e-05	1.80471	1	1	http://tritrypdb.org/gene/TcCLB.507959.323
TcCLB.510759.120	reiske_iron-sulfur_protein_precursor_putative	-2.00401	3.74e-16	5.46e-15	3.63e-14	7.97819	1	1	http://tritrypdb.org/gene/TcCLB.510759.120
TcCLB.506465.14	hypothetical_protein_conserved	-2.00093	2.96e-10	3.32e-10	2.21e-09	5.6015	1	1	http://tritrypdb.org/gene/TcCLB.506465.14
TcCLB.509757.49	L-ribulokinase_putative	-2.00075	1.75e-05	6.29e-06	4.18e-05	3.5183	1	1	http://tritrypdb.org/gene/TcCLB.509757.49
TcCLB.506753.140	hypothetical_protein_conserved	-1.99843	9.31e-11	1.23e-10	8.17e-10	4.832	1	1	http://tritrypdb.org/gene/TcCLB.506753.140
TcCLB.506947.10	hypothetical_protein_conserved	-1.99789	6.68e-08	4.02e-08	2.67e-07	5.20475	1	1	http://tritrypdb.org/gene/TcCLB.506947.10
TcCLB.510911.40	hypothetical_protein_conserved	-1.99601	1.02e-05	3.83e-06	2.54e-05	3.93184	1	1	http://tritrypdb.org/gene/TcCLB.510911.40
TcCLB.506661.20	fatty_acid_elongase_putative	-1.98727	1.95e-14	1.12e-13	7.43e-13	7.54603	1	1	http://tritrypdb.org/gene/TcCLB.506661.20
TcCLB.433673.10	trans-sialidase_putative	-1.9826	4.86e-09	3.92e-09	2.6e-08	6.59068	1	1	http://tritrypdb.org/gene/TcCLB.433673.10
TcCLB.508551.39	hexose_transporter_putative	-1.98067	0.000654039	0.000180087	0.00119574	8.72369	1	1	http://tritrypdb.org/gene/TcCLB.508551.39
TcCLB.504111.40	hypothetical_protein_conserved	-1.97971	1.56e-10	1.92e-10	1.28e-09	4.82115	1	1	http://tritrypdb.org/gene/TcCLB.504111.40
TcCLB.410243.10	hypothetical_protein_conserved	-1.97798	8.61e-09	6.47e-09	4.3e-08	4.09305	1	1	http://tritrypdb.org/gene/TcCLB.410243.10
TcCLB.506925.310	hypothetical_protein_conserved	-1.97418	8.94e-13	2.39e-12	1.59e-11	8.65644	1	1	http://tritrypdb.org/gene/TcCLB.506925.310
TcCLB.504137.50	hypothetical_protein_conserved	-1.97363	9.96e-09	7.34e-09	4.87e-08	4.60687	1	1	http://tritrypdb.org/gene/TcCLB.504137.50
TcCLB.504057.97	hypothetical_protein_conserved	-1.97073	1.64e-11	2.77e-11	1.84e-10	5.89253	1	1	http://tritrypdb.org/gene/TcCLB.504057.97
TcCLB.504507.5	trypanothione_reductase_putative	-1.96909	3.52e-16	5.29e-15	3.51e-14	7.3131	1	1	http://tritrypdb.org/gene/TcCLB.504507.5
TcCLB.506357.120	ethanolamine_phosphotransferase_putative	-1.95959	2.49e-14	1.3e-13	8.65e-13	6.14038	1	1	http://tritrypdb.org/gene/TcCLB.506357.120
TcCLB.482471.10	hypothetical_protein_conserved	-1.95789	2.98e-12	6.66e-12	4.42e-11	6.46297	1	1	http://tritrypdb.org/gene/TcCLB.482471.10
TcCLB.506205.20	hypothetical_protein	-1.95464	1.72e-12	4.22e-12	2.8e-11	6.56174	1	1	http://tritrypdb.org/gene/TcCLB.506205.20
TcCLB.506401.360	hypothetical_protein_conserved	-1.95334	9.51e-10	9.29e-10	6.17e-09	4.47937	1	1	http://tritrypdb.org/gene/TcCLB.506401.360
TcCLB.509141.40	voltage-dependent_anion-selective_channel_putative	-1.95314	1.46e-09	1.36e-09	9.06e-09	7.37753	1	1	http://tritrypdb.org/gene/TcCLB.509141.40
TcCLB.504769.150	hypothetical_protein	-1.95262	0.0152019	0.00335983	0.0223085	-0.253874	1	1	http://tritrypdb.org/gene/TcCLB.504769.150
TcCLB.508277.220	hypothetical_protein	-1.95261	5.7e-15	4.36e-14	2.9e-13	6.51521	1	1	http://tritrypdb.org/gene/TcCLB.508277.220
TcCLB.511417.70	histone-lysine_N-methyltransferase_putative	-1.95233	3.41e-15	2.97e-14	1.97e-13	7.28999	1	1	http://tritrypdb.org/gene/TcCLB.511417.70
TcCLB.509165.34	ribosomal_P_protein_AGP2beta-1_putative	-1.94589	9.46e-10	9.25e-10	6.14e-09	4.37214	1	1	http://tritrypdb.org/gene/TcCLB.509165.34
TcCLB.424195.5	hypothetical_protein_conserved	-1.94262	2.78e-06	1.17e-06	7.78e-06	3.36068	1	1	http://tritrypdb.org/gene/TcCLB.424195.5
TcCLB.511067.20	60S_ribosomal_protein_L26_putative	-1.94118	4.91e-10	5.23e-10	3.47e-09	8.42876	1	1	http://tritrypdb.org/gene/TcCLB.511067.20
TcCLB.511911.94	hypothetical_protein_conserved	-1.94092	3.92e-13	1.21e-12	8.06e-12	6.74464	1	1	http://tritrypdb.org/gene/TcCLB.511911.94
TcCLB.511065.36	hypothetical_protein_conserved	-1.94065	1.27e-14	7.88e-14	5.23e-13	6.35382	1	1	http://tritrypdb.org/gene/TcCLB.511065.36
TcCLB.511735.10	chaperonin_HSP60/CNP60_putative	-1.93676	2.19e-11	3.55e-11	2.36e-10	5.29969	1	1	http://tritrypdb.org/gene/TcCLB.511735.10
TcCLB.509895.10	hypothetical_protein_conserved	-1.93496	4.42e-17	1.28e-15	8.49e-15	7.94117	1	1	http://tritrypdb.org/gene/TcCLB.509895.10
TcCLB.506941.280	heat_shock_70_kDa_protein_mitochondrial_precursor_putative	-1.93351	2.3e-11	3.7e-11	2.46e-10	7.2286	1	1	http://tritrypdb.org/gene/TcCLB.506941.280
TcCLB.503835.39	hypothetical_protein_conserved	-1.92998	6.41e-09	4.99e-09	3.31e-08	5.59718	1	1	http://tritrypdb.org/gene/TcCLB.503835.39
TcCLB.507963.20	arginase_putative	-1.92937	1.6e-12	3.95e-12	2.62e-11	5.81387	1	1	http://tritrypdb.org/gene/TcCLB.507963.20
TcCLB.511439.40	hypothetical_protein	-1.92539	2.02e-12	4.82e-12	3.2e-11	7.85161	1	1	http://tritrypdb.org/gene/TcCLB.511439.40
TcCLB.511705.5	trans-sialidase_(pseudogene)_putative	-1.91869	0.0122382	0.0027417	0.0182043	1.9316	1	1	http://tritrypdb.org/gene/TcCLB.511705.5
TcCLB.509543.50	DNAK_protein_putative	-1.91763	2.5e-13	8.44e-13	5.6e-12	8.19848	1	1	http://tritrypdb.org/gene/TcCLB.509543.50
TcCLB.508785.4	hypothetical_protein_conserved	-1.91618	9.74e-14	3.86e-13	2.57e-12	6.96233	1	1	http://tritrypdb.org/gene/TcCLB.508785.4
TcCLB.509351.10	delta-1-pyrroline-5-carboxylate_dehydrogenase_putative	-1.90825	5.29e-15	4.17e-14	2.77e-13	6.35482	1	1	http://tritrypdb.org/gene/TcCLB.509351.10
TcCLB.503955.20	mitochondrial_DNA_polymerase_beta_putative	-1.90387	5.49e-15	4.26e-14	2.83e-13	7.65966	1	1	http://tritrypdb.org/gene/TcCLB.503955.20
TcCLB.504137.10	isoleucyl-tRNA_synthetase_putative	-1.90139	1.08e-10	1.39e-10	9.25e-10	5.91682	1	1	http://tritrypdb.org/gene/TcCLB.504137.10
TcCLB.509979.281	elongation_factor_1-gamma_(EF-1-gamma_pseudogene)_putative	-1.89794	1.3e-06	5.85e-07	3.88e-06	3.28118	1	1	http://tritrypdb.org/gene/TcCLB.509979.281
TcCLB.509167.110	S-adenosylmethionine_decarboxylase_proenzyme_putative	-1.89612	1.3e-07	7.32e-08	4.86e-07	5.61673	1	1	http://tritrypdb.org/gene/TcCLB.509167.110
TcCLB.507711.200	hypothetical_protein_conserved	-1.89498	2.21e-14	1.22e-13	8.09e-13	8.53144	1	1	http://tritrypdb.org/gene/TcCLB.507711.200
TcCLB.432027.9	hypothetical_protein_conserved	-1.8948	2.72e-10	3.08e-10	2.05e-09	4.66256	1	1	http://tritrypdb.org/gene/TcCLB.432027.9
TcCLB.419703.10	hypothetical_protein	-1.89467	4.37e-10	4.71e-10	3.12e-09	4.88651	1	1	http://tritrypdb.org/gene/TcCLB.419703.10
TcCLB.507047.180	hypothetical_protein_conserved	-1.89446	5.34e-09	4.26e-09	2.83e-08	4.65442	1	1	http://tritrypdb.org/gene/TcCLB.507047.180
TcCLB.503487.70	hypothetical_protein_conserved	-1.89435	1e-14	6.57e-14	4.36e-13	6.72522	1	1	http://tritrypdb.org/gene/TcCLB.503487.70
TcCLB.510181.170	no_Fct	-1.89421	0.00137663	0.000359098	0.00238433	0.238637	1	1	http://tritrypdb.org/gene/TcCLB.510181.170
TcCLB.503833.69	ribosome_biogenesis_protein_putative	-1.89113	5.9e-10	6.16e-10	4.09e-09	5.99894	1	1	http://tritrypdb.org/gene/TcCLB.503833.69
TcCLB.466879.10	hypothetical_protein_conserved	-1.88799	0.000518677	0.000145667	0.000967193	2.64502	1	1	http://tritrypdb.org/gene/TcCLB.466879.10
TcCLB.503789.10	hypothetical_protein	-1.88434	1.66e-10	2.03e-10	1.35e-09	4.87987	1	1	http://tritrypdb.org/gene/TcCLB.503789.10
TcCLB.504087.20	hypothetical_protein	-1.88184	4.53e-12	9.42e-12	6.26e-11	8.85875	1	1	http://tritrypdb.org/gene/TcCLB.504087.20
TcCLB.508785.10	hypothetical_protein_conserved	-1.87937	3.53e-14	1.68e-13	1.12e-12	5.90583	1	1	http://tritrypdb.org/gene/TcCLB.508785.10
TcCLB.511303.64	hypothetical_protein_conserved	-1.87857	5.59e-11	7.82e-11	5.19e-10	6.18474	1	1	http://tritrypdb.org/gene/TcCLB.511303.64
TcCLB.508375.89	fucose_kinase_putative	-1.87791	1.62e-05	5.86e-06	3.89e-05	3.51071	1	1	http://tritrypdb.org/gene/TcCLB.508375.89
TcCLB.506289.30	hypothetical_protein_conserved	-1.8776	2.91e-13	9.51e-13	6.31e-12	6.03874	1	1	http://tritrypdb.org/gene/TcCLB.506289.30
TcCLB.503453.40	60S_ribosomal_protein_L30_putative	-1.87735	8.68e-06	3.31e-06	2.2e-05	6.82426	1	1	http://tritrypdb.org/gene/TcCLB.503453.40
TcCLB.510309.20	MFS_transporter_putative	-1.87651	1.25e-12	3.18e-12	2.11e-11	6.79701	1	1	http://tritrypdb.org/gene/TcCLB.510309.20
TcCLB.506205.30	hypothetical_protein_conserved	-1.87563	4.29e-13	1.31e-12	8.72e-12	5.57588	1	1	http://tritrypdb.org/gene/TcCLB.506205.30
TcCLB.510431.90	hypothetical_protein_conserved	-1.87228	1.33e-07	7.47e-08	4.96e-07	4.48274	1	1	http://tritrypdb.org/gene/TcCLB.510431.90
TcCLB.511469.20	hypothetical_protein_conserved	-1.87074	1.63e-14	9.54e-14	6.33e-13	6.90044	1	1	http://tritrypdb.org/gene/TcCLB.511469.20
TcCLB.450155.9	hypothetical_protein_conserved	-1.86539	1.28e-07	7.21e-08	4.79e-07	5.20293	1	1	http://tritrypdb.org/gene/TcCLB.450155.9
TcCLB.506775.90	PIF1_helicase-like_protein_putativeDNA_repair_and_recombination_protein_mitochondrial_precursor_putative	-1.86401	4.37e-14	2.01e-13	1.33e-12	7.04136	1	1	http://tritrypdb.org/gene/TcCLB.506775.90
TcCLB.508787.5	mitochondrial_structure_specific_endonuclease_I_(SSE-1)_putative	-1.86274	2.52e-05	8.78e-06	5.83e-05	2.95136	1	1	http://tritrypdb.org/gene/TcCLB.508787.5
TcCLB.506343.51	retrotransposon_hot_spot_protein_(RHS_pseudogene)_putative	-1.8591	0.00851948	0.00195558	0.0129846	1.12423	1	1	http://tritrypdb.org/gene/TcCLB.506343.51
TcCLB.506529.360	cytochrome_c_oxidase_subunit_IV_putative	-1.85845	1.42e-13	5.3e-13	3.52e-12	8.15771	1	1	http://tritrypdb.org/gene/TcCLB.506529.360
TcCLB.508551.30	hexose_transporter_putative	-1.858	8.92e-08	5.21e-08	3.46e-07	9.72583	1	1	http://tritrypdb.org/gene/TcCLB.508551.30
TcCLB.509965.30	small_nuclear_ribonucleoprotein_Sm-E_putative	-1.85752	4.81e-10	5.14e-10	3.41e-09	5.11723	1	1	http://tritrypdb.org/gene/TcCLB.509965.30
TcCLB.511467.70	hypothetical_protein_conserved	-1.85675	5.04e-09	4.05e-09	2.69e-08	4.84606	1	1	http://tritrypdb.org/gene/TcCLB.511467.70
TcCLB.511037.20	hypothetical_protein_conserved	-1.85661	1.37e-13	5.16e-13	3.42e-12	6.57258	1	1	http://tritrypdb.org/gene/TcCLB.511037.20
TcCLB.507809.39	hypothetical_protein_conserved	-1.85603	2.03e-10	2.4e-10	1.6e-09	4.57868	1	1	http://tritrypdb.org/gene/TcCLB.507809.39
TcCLB.508555.50	calpain-like_cysteine_peptidase_putativecysteine_peptidase_Clan_CA_family_C2_putative	-1.85601	1.37e-11	2.39e-11	1.58e-10	5.57492	1	1	http://tritrypdb.org/gene/TcCLB.508555.50
TcCLB.509769.80	hypothetical_protein_conserved	-1.85549	1.38e-14	8.38e-14	5.56e-13	7.03723	1	1	http://tritrypdb.org/gene/TcCLB.509769.80
TcCLB.506715.40	hypothetical_protein_conserved	-1.85431	2.48e-14	1.3e-13	8.65e-13	6.24956	1	1	http://tritrypdb.org/gene/TcCLB.506715.40
TcCLB.511545.80	amino_acid_transporter_putativeamino_acid_permease_putative	-1.85157	5.86e-09	4.61e-09	3.06e-08	5.64616	1	1	http://tritrypdb.org/gene/TcCLB.511545.80
TcCLB.511201.49	hypothetical_protein_conserved	-1.85148	8.5e-15	5.77e-14	3.83e-13	7.86011	1	1	http://tritrypdb.org/gene/TcCLB.511201.49
TcCLB.506743.69	hypothetical_protein_conserved	-1.85143	2.26e-08	1.53e-08	1.01e-07	3.9237	1	1	http://tritrypdb.org/gene/TcCLB.506743.69
TcCLB.510125.10	pumilio/PUF_RNA_binding_protein_6_putative	-1.8511	1.7e-07	9.31e-08	6.18e-07	4.33954	1	1	http://tritrypdb.org/gene/TcCLB.510125.10
TcCLB.510173.70	hypothetical_protein_conserved	-1.85086	1.22e-12	3.13e-12	2.08e-11	5.6881	1	1	http://tritrypdb.org/gene/TcCLB.510173.70
TcCLB.506797.90	short_chain_dehydrogenase/reductase_putative	-1.84886	2.13e-12	5.06e-12	3.36e-11	6.28223	1	1	http://tritrypdb.org/gene/TcCLB.506797.90
TcCLB.508567.49	hypothetical_protein_conserved	-1.84696	1.46e-09	1.36e-09	9.06e-09	4.32925	1	1	http://tritrypdb.org/gene/TcCLB.508567.49
TcCLB.511529.68	cyclin-dependent_kinases_regulatory_subunit_putative	-1.84402	9.76e-12	1.8e-11	1.19e-10	6.12506	1	1	http://tritrypdb.org/gene/TcCLB.511529.68
TcCLB.509707.10	hypothetical_protein_conserved	-1.84177	3.96e-09	3.28e-09	2.18e-08	4.49911	1	1	http://tritrypdb.org/gene/TcCLB.509707.10
TcCLB.510165.50	hypothetical_protein_conserved	-1.83694	5.7e-10	5.98e-10	3.97e-09	4.97782	1	1	http://tritrypdb.org/gene/TcCLB.510165.50
TcCLB.508647.200	triosephosphate_isomerase_putative	-1.8368	4.24e-12	8.89e-12	5.9e-11	7.49803	1	1	http://tritrypdb.org/gene/TcCLB.508647.200
TcCLB.511127.74	hypothetical_protein_conserved	-1.83626	9.23e-10	9.08e-10	6.03e-09	4.66076	1	1	http://tritrypdb.org/gene/TcCLB.511127.74
TcCLB.506907.40	hypothetical_protein	-1.83218	0.00547218	0.00129671	0.00860984	-0.657518	1	1	http://tritrypdb.org/gene/TcCLB.506907.40
TcCLB.509167.50	hypothetical_protein	-1.83164	5.44e-11	7.66e-11	5.09e-10	5.52848	1	1	http://tritrypdb.org/gene/TcCLB.509167.50
TcCLB.507927.90	hypothetical_protein_conserved	-1.83032	2.43e-11	3.86e-11	2.56e-10	4.84345	1	1	http://tritrypdb.org/gene/TcCLB.507927.90
TcCLB.507993.290	hypothetical_protein_conserved	-1.83029	4.29e-11	6.24e-11	4.14e-10	5.36218	1	1	http://tritrypdb.org/gene/TcCLB.507993.290
TcCLB.508277.370	mitochondrial_DNA_topoisomerase_II_putative	-1.8294	2.21e-14	1.22e-13	8.09e-13	8.21468	1	1	http://tritrypdb.org/gene/TcCLB.508277.370
TcCLB.508323.94	cyclophilin_putativePPIase_putativerotamase_putativepeptidyl-prolyl_cis-trans_isomerase_putative	-1.82414	5.8e-09	4.58e-09	3.04e-08	4.56528	1	1	http://tritrypdb.org/gene/TcCLB.508323.94
TcCLB.506529.516	ATP_synthase_subunit_putative	-1.82275	1.24e-07	7e-08	4.65e-07	4.67979	1	1	http://tritrypdb.org/gene/TcCLB.506529.516
TcCLB.506367.10	isovaleryl-coA_dehydrogenase_putative	-1.82274	2.88e-09	2.49e-09	1.65e-08	4.72635	1	1	http://tritrypdb.org/gene/TcCLB.506367.10
TcCLB.510839.11	hypothetical_protein	-1.82095	3.11e-08	2.03e-08	1.35e-07	3.88734	1	1	http://tritrypdb.org/gene/TcCLB.510839.11
TcCLB.509767.240	hypothetical_protein_conserved	-1.82025	7.03e-07	3.36e-07	2.23e-06	4.59769	1	1	http://tritrypdb.org/gene/TcCLB.509767.240
TcCLB.504867.129	hypothetical_protein_conserved	-1.81633	1.97e-07	1.06e-07	7.02e-07	5.09002	1	1	http://tritrypdb.org/gene/TcCLB.504867.129
TcCLB.504035.80	hypothetical_protein_conserved	-1.8106	3.04e-10	3.4e-10	2.26e-09	4.77129	1	1	http://tritrypdb.org/gene/TcCLB.504035.80
TcCLB.503981.90	DNA_helicase_putative	-1.80773	9.63e-08	5.58e-08	3.7e-07	4.0091	1	1	http://tritrypdb.org/gene/TcCLB.503981.90
TcCLB.503531.49	structural_maintenance_of_chromosome_3_putative	-1.8045	5.28e-08	3.26e-08	2.16e-07	4.89644	1	1	http://tritrypdb.org/gene/TcCLB.503531.49
TcCLB.506931.10	haloacid_dehalogenase-like_hydrolase_putative	-1.80237	3.31e-12	7.2e-12	4.78e-11	7.09639	1	1	http://tritrypdb.org/gene/TcCLB.506931.10
TcCLB.509591.20	phosphoprotein_phosphatase_putative	-1.80213	1.17e-07	6.67e-08	4.43e-07	4.36176	1	1	http://tritrypdb.org/gene/TcCLB.509591.20
TcCLB.503487.60	hypothetical_protein_conserved	-1.80032	1.36e-10	1.7e-10	1.13e-09	5.50184	1	1	http://tritrypdb.org/gene/TcCLB.503487.60
TcCLB.510507.20	3-ketoacyl-CoA_thiolase_putative	-1.80009	4.57e-14	2.07e-13	1.37e-12	8.06258	1	1	http://tritrypdb.org/gene/TcCLB.510507.20
TcCLB.508951.20	hexokinase_putative	-1.79973	2.24e-09	1.99e-09	1.32e-08	7.93976	1	1	http://tritrypdb.org/gene/TcCLB.508951.20
TcCLB.510343.5	hypothetical_protein_conserved	-1.79933	1.48e-07	8.2e-08	5.45e-07	4.27061	1	1	http://tritrypdb.org/gene/TcCLB.510343.5
TcCLB.506369.60	hypothetical_protein_conserved	-1.79865	1.84e-08	1.27e-08	8.45e-08	5.16889	1	1	http://tritrypdb.org/gene/TcCLB.506369.60
TcCLB.511361.4	hypothetical_protein_conserved	-1.79604	1.12e-07	6.42e-08	4.27e-07	4.00497	1	1	http://tritrypdb.org/gene/TcCLB.511361.4
TcCLB.508465.40	hypothetical_protein_conserved	-1.79498	1.48e-11	2.55e-11	1.69e-10	4.99083	1	1	http://tritrypdb.org/gene/TcCLB.508465.40
TcCLB.509979.150	nitrilase_putative	-1.79456	3.34e-11	5.01e-11	3.33e-10	5.91833	1	1	http://tritrypdb.org/gene/TcCLB.509979.150
TcCLB.510857.4	hypothetical_protein_conserved	-1.79266	1.56e-11	2.66e-11	1.77e-10	5.46402	1	1	http://tritrypdb.org/gene/TcCLB.510857.4
TcCLB.511145.60	ATP_synthase_F1_subunit_gamma_protein_putative	-1.79247	1.66e-13	6.02e-13	4e-12	7.06877	1	1	http://tritrypdb.org/gene/TcCLB.511145.60
TcCLB.510535.50	hypothetical_protein	-1.79045	3.97e-09	3.29e-09	2.18e-08	4.73587	1	1	http://tritrypdb.org/gene/TcCLB.510535.50
TcCLB.511047.40	NADH-cytochrome_b5_reductase_putative	-1.78972	4.33e-13	1.32e-12	8.77e-12	7.1439	1	1	http://tritrypdb.org/gene/TcCLB.511047.40
TcCLB.509885.80	hypothetical_protein_conserved	-1.78801	5.4e-07	2.64e-07	1.75e-06	4.01288	1	1	http://tritrypdb.org/gene/TcCLB.509885.80
TcCLB.504125.120	hypothetical_protein_conserved	-1.78697	1.13e-08	8.2e-09	5.44e-08	4.56497	1	1	http://tritrypdb.org/gene/TcCLB.504125.120
TcCLB.504025.10	hypothetical_protein_conserved	-1.78432	5.08e-10	5.41e-10	3.59e-09	4.46141	1	1	http://tritrypdb.org/gene/TcCLB.504025.10
TcCLB.510595.58	hypothetical_protein_conserved	-1.78337	6.01e-09	4.71e-09	3.13e-08	4.83203	1	1	http://tritrypdb.org/gene/TcCLB.510595.58
TcCLB.511575.90	hypothetical_protein	-1.78181	8.81e-09	6.6e-09	4.38e-08	4.6913	1	1	http://tritrypdb.org/gene/TcCLB.511575.90
TcCLB.509455.80	GTP-binding_nuclear_protein_rtb2_putative	-1.78038	3.28e-11	4.93e-11	3.28e-10	7.62178	1	1	http://tritrypdb.org/gene/TcCLB.509455.80
TcCLB.503967.19	hypothetical_protein	-1.77885	3.74e-06	1.53e-06	1.02e-05	3.52589	1	1	http://tritrypdb.org/gene/TcCLB.503967.19
TcCLB.510297.119	hypothetical_protein_conserved	-1.77789	0.0429188	0.00879248	0.05838	-0.930131	1	0	http://tritrypdb.org/gene/TcCLB.510297.119
TcCLB.511211.80	hypothetical_protein_conserved	-1.77582	7.36e-11	1e-10	6.67e-10	5.15433	1	1	http://tritrypdb.org/gene/TcCLB.511211.80
TcCLB.438147.9	hypothetical_protein_conserved	-1.77169	8.09e-10	8.07e-10	5.36e-09	5.57135	1	1	http://tritrypdb.org/gene/TcCLB.438147.9
TcCLB.511179.60	hypothetical_protein_conserved	-1.77069	1.87e-06	8.16e-07	5.42e-06	3.87547	1	1	http://tritrypdb.org/gene/TcCLB.511179.60
TcCLB.506517.30	hypothetical_protein	-1.76952	1.1e-12	2.84e-12	1.88e-11	6.7734	1	1	http://tritrypdb.org/gene/TcCLB.506517.30
TcCLB.508537.10	glyceraldehyde_3-phosphate_dehydrogenase_cytosolic_putative	-1.76913	1.57e-05	5.68e-06	3.77e-05	3.4466	1	1	http://tritrypdb.org/gene/TcCLB.508537.10
TcCLB.504011.70	hypothetical_protein_conserved	-1.76736	1.24e-09	1.18e-09	7.84e-09	4.86989	1	1	http://tritrypdb.org/gene/TcCLB.504011.70
TcCLB.511041.4	hypothetical_protein_conserved	-1.76594	2.99e-08	1.96e-08	1.3e-07	3.92914	1	1	http://tritrypdb.org/gene/TcCLB.511041.4
TcCLB.510181.180	no_Fct	-1.76591	8.33e-06	3.19e-06	2.12e-05	2.29956	1	1	http://tritrypdb.org/gene/TcCLB.510181.180
TcCLB.507099.30	Ran-binding_protein_1_putative	-1.76545	7.39e-14	3.09e-13	2.05e-12	6.96598	1	1	http://tritrypdb.org/gene/TcCLB.507099.30
TcCLB.509705.10	cellulosomal_scaffoldin_anchoring_protein_putative	-1.76542	1.47e-08	1.04e-08	6.93e-08	4.70994	1	1	http://tritrypdb.org/gene/TcCLB.509705.10
TcCLB.503599.30	hypothetical_protein_conserved	-1.76486	9.06e-11	1.2e-10	7.98e-10	4.9321	1	1	http://tritrypdb.org/gene/TcCLB.503599.30
TcCLB.506205.49	hypothetical_protein_conserved	-1.76445	5.98e-07	2.9e-07	1.92e-06	3.81594	1	1	http://tritrypdb.org/gene/TcCLB.506205.49
TcCLB.506135.9	heat_shock_70_kDa_protein_putative	-1.76436	1.82e-11	3.03e-11	2.01e-10	8.56471	1	1	http://tritrypdb.org/gene/TcCLB.506135.9
TcCLB.506591.30	hypothetical_protein_conserved	-1.75984	1.62e-13	5.88e-13	3.9e-12	6.46621	1	1	http://tritrypdb.org/gene/TcCLB.506591.30
TcCLB.506979.40	hypothetical_protein_conserved	-1.75867	6.06e-11	8.39e-11	5.57e-10	5.84879	1	1	http://tritrypdb.org/gene/TcCLB.506979.40
TcCLB.506863.30	hypothetical_protein_conserved	-1.75762	1.83e-06	8.03e-07	5.33e-06	3.49801	1	1	http://tritrypdb.org/gene/TcCLB.506863.30
TcCLB.504769.60	hypothetical_protein_conserved	-1.75711	1.75e-07	9.52e-08	6.32e-07	3.26958	1	1	http://tritrypdb.org/gene/TcCLB.504769.60
TcCLB.506487.60	endosomal_integral_membrane_protein_putative	-1.75692	1.28e-07	7.24e-08	4.81e-07	3.85196	1	1	http://tritrypdb.org/gene/TcCLB.506487.60
TcCLB.484299.4	ATP-dependent_DEAD/H_RNA_helicase_putative	-1.75648	1.33e-08	9.47e-09	6.28e-08	4.45151	1	1	http://tritrypdb.org/gene/TcCLB.484299.4
TcCLB.506401.160	hypothetical_protein_conserved	-1.75616	1.35e-10	1.7e-10	1.13e-09	5.95264	1	1	http://tritrypdb.org/gene/TcCLB.506401.160
TcCLB.506945.270	cyclin_putative	-1.75556	7.17e-09	5.5e-09	3.65e-08	5.33393	1	1	http://tritrypdb.org/gene/TcCLB.506945.270
TcCLB.506517.149	hypothetical_protein_conserved	-1.75368	1.56e-10	1.92e-10	1.28e-09	6.82585	1	1	http://tritrypdb.org/gene/TcCLB.506517.149
TcCLB.511421.185	hypothetical_protein_conserved	-1.75091	7.63e-08	4.52e-08	3e-07	3.87015	1	1	http://tritrypdb.org/gene/TcCLB.511421.185
TcCLB.508831.110	protein_kinase_putative	-1.74919	9.29e-10	9.11e-10	6.05e-09	4.97373	1	1	http://tritrypdb.org/gene/TcCLB.508831.110
TcCLB.510349.20	hypothetical_protein_conserved	-1.74774	9.75e-11	1.28e-10	8.5e-10	4.58955	1	1	http://tritrypdb.org/gene/TcCLB.510349.20
TcCLB.479721.10	hypothetical_protein_conserved_(pseudogene)	-1.74394	9.34e-07	4.34e-07	2.88e-06	2.94086	1	1	http://tritrypdb.org/gene/TcCLB.479721.10
TcCLB.510911.10	profilin_putative	-1.74207	9.08e-11	1.2e-10	7.99e-10	6.18012	1	1	http://tritrypdb.org/gene/TcCLB.510911.10
TcCLB.510749.40	ubiquitin_hydrolase_putativecysteine_peptidase_Clan_CA_family_C19_putative	-1.74135	2.41e-05	8.43e-06	5.6e-05	2.90419	1	1	http://tritrypdb.org/gene/TcCLB.510749.40
TcCLB.508647.40	replication_factor_C_subunit_1_putative	-1.74121	1.69e-15	1.66e-14	1.1e-13	6.89215	1	1	http://tritrypdb.org/gene/TcCLB.508647.40
TcCLB.503989.30	hypothetical_protein_conserved_(pseudogene)hypothetical_protein_conserved_frameshift	-1.74067	8.93e-14	3.6e-13	2.39e-12	6.75332	1	1	http://tritrypdb.org/gene/TcCLB.503989.30
TcCLB.506207.40	hypothetical_protein_conserved	-1.73944	1.17e-15	1.25e-14	8.31e-14	7.1552	1	1	http://tritrypdb.org/gene/TcCLB.506207.40
TcCLB.425311.9	hypothetical_protein_conserved	-1.73926	7.13e-10	7.25e-10	4.81e-09	5.2763	1	1	http://tritrypdb.org/gene/TcCLB.425311.9
TcCLB.508609.20	hypothetical_protein	-1.73847	1.73e-10	2.09e-10	1.39e-09	5.05121	1	1	http://tritrypdb.org/gene/TcCLB.508609.20
TcCLB.510347.5	protein_kinase_putative	-1.7372	0.00330419	0.000809636	0.0053758	0.330548	1	1	http://tritrypdb.org/gene/TcCLB.510347.5
TcCLB.506401.150	hypothetical_protein_conserved	-1.73651	3.02e-11	4.61e-11	3.06e-10	5.14483	1	1	http://tritrypdb.org/gene/TcCLB.506401.150
TcCLB.503955.80	hypothetical_protein	-1.73645	3.94e-07	1.98e-07	1.31e-06	3.74233	1	1	http://tritrypdb.org/gene/TcCLB.503955.80
TcCLB.507711.50	hypothetical_protein_conserved	-1.73493	1.23e-08	8.89e-09	5.9e-08	5.03935	1	1	http://tritrypdb.org/gene/TcCLB.507711.50
TcCLB.511075.50	hypothetical_protein	-1.73441	1.62e-08	1.14e-08	7.54e-08	5.22461	1	1	http://tritrypdb.org/gene/TcCLB.511075.50
TcCLB.508277.90	hypothetical_protein_conserved	-1.73179	5.06e-13	1.49e-12	9.9e-12	5.69442	1	1	http://tritrypdb.org/gene/TcCLB.508277.90
TcCLB.511627.80	hypothetical_protein_conserved	-1.73174	7.32e-10	7.41e-10	4.92e-09	4.74014	1	1	http://tritrypdb.org/gene/TcCLB.511627.80
TcCLB.506893.100	hypothetical_protein_conserved	-1.7317	2.01e-10	2.39e-10	1.58e-09	5.39326	1	1	http://tritrypdb.org/gene/TcCLB.506893.100
TcCLB.508371.10	glutamine-dependent_carbamoyl-phosphate_synthetase_(pseudogene)_putativeGATase-CPSase_(pseudogene)_putativecarbamoyl-phosphate_synthase_(ammonia)_(pseudogene)_putative	-1.72911	5.69e-10	5.98e-10	3.97e-09	6.91819	1	1	http://tritrypdb.org/gene/TcCLB.508371.10
TcCLB.510997.40	enoyl-CoA_hydratase/isomerase_family_protein_putative	-1.72876	1.22e-11	2.15e-11	1.43e-10	6.1201	1	1	http://tritrypdb.org/gene/TcCLB.510997.40
TcCLB.504625.99	protein_tyrosine_phosphatase_putative	-1.72875	1.71e-09	1.55e-09	1.03e-08	5.22301	1	1	http://tritrypdb.org/gene/TcCLB.504625.99
TcCLB.511713.9	hypothetical_protein_conserved	-1.72861	2.01e-08	1.38e-08	9.15e-08	4.10402	1	1	http://tritrypdb.org/gene/TcCLB.511713.9
TcCLB.506357.40	elongation_factor_Tu_putative	-1.72763	3.69e-14	1.75e-13	1.16e-12	7.96295	1	1	http://tritrypdb.org/gene/TcCLB.506357.40
TcCLB.511001.240	proteasome_activator_protein_pa26_putative	-1.72729	5.21e-07	2.56e-07	1.7e-06	4.82107	1	1	http://tritrypdb.org/gene/TcCLB.511001.240
TcCLB.506773.10	hypothetical_protein_conserved	-1.7269	0.000178861	5.43e-05	0.000360513	3.10809	1	1	http://tritrypdb.org/gene/TcCLB.506773.10
TcCLB.511625.50	GTP-binding_protein_putative	-1.72635	3.36e-12	7.28e-12	4.84e-11	6.88552	1	1	http://tritrypdb.org/gene/TcCLB.511625.50
TcCLB.510289.99	hypothetical_protein_conserved	-1.72521	3.24e-10	3.6e-10	2.39e-09	5.15403	1	1	http://tritrypdb.org/gene/TcCLB.510289.99
TcCLB.509233.150	cytochrome_c_oxidase_VII_putative	-1.72493	3.14e-13	1e-12	6.67e-12	7.74998	1	1	http://tritrypdb.org/gene/TcCLB.509233.150
TcCLB.511531.20	hypothetical_protein_conserved	-1.7235	5.53e-11	7.76e-11	5.15e-10	5.35299	1	1	http://tritrypdb.org/gene/TcCLB.511531.20
TcCLB.507757.30	hypothetical_protein_conserved	-1.72304	1.46e-09	1.36e-09	9.03e-09	4.8256	1	1	http://tritrypdb.org/gene/TcCLB.507757.30
TcCLB.511871.30	hypothetical_protein_conserved	-1.72253	6.07e-14	2.62e-13	1.74e-12	6.94732	1	1	http://tritrypdb.org/gene/TcCLB.511871.30
TcCLB.510863.20	hypothetical_protein	-1.72169	9.21e-12	1.71e-11	1.13e-10	5.70528	1	1	http://tritrypdb.org/gene/TcCLB.510863.20
TcCLB.506731.10	hypothetical_protein	-1.72018	4.98e-05	1.65e-05	0.000109629	3.61723	1	1	http://tritrypdb.org/gene/TcCLB.506731.10
TcCLB.504153.120	hypothetical_protein_conserved	-1.71766	4.21e-13	1.29e-12	8.59e-12	7.96686	1	1	http://tritrypdb.org/gene/TcCLB.504153.120
TcCLB.510345.20	hypothetical_protein	-1.71575	2.21e-06	9.5e-07	6.31e-06	3.81548	1	1	http://tritrypdb.org/gene/TcCLB.510345.20
TcCLB.511071.30	hypothetical_protein_conserved	-1.71463	4.99e-11	7.11e-11	4.72e-10	5.19869	1	1	http://tritrypdb.org/gene/TcCLB.511071.30
TcCLB.509441.10	hypothetical_protein_conserved	-1.71455	2.75e-12	6.24e-12	4.15e-11	6.36561	1	1	http://tritrypdb.org/gene/TcCLB.509441.10
TcCLB.509775.34	hypothetical_protein_conserved	-1.71293	2.37e-11	3.8e-11	2.52e-10	5.49575	1	1	http://tritrypdb.org/gene/TcCLB.509775.34
TcCLB.506933.46	hypothetical_protein_conserved	-1.71206	8.9e-07	4.16e-07	2.76e-06	3.89414	1	1	http://tritrypdb.org/gene/TcCLB.506933.46
TcCLB.506207.50	IgE-dependent_histamine-releasing_factor_putative	-1.7114	2.49e-12	5.75e-12	3.81e-11	9.37042	1	1	http://tritrypdb.org/gene/TcCLB.506207.50
TcCLB.503643.10	KU70_protein_putative	-1.70958	1.77e-11	2.95e-11	1.96e-10	5.60935	1	1	http://tritrypdb.org/gene/TcCLB.503643.10
TcCLB.509233.230	hypothetical_protein_conserved	-1.70718	1.34e-09	1.26e-09	8.38e-09	4.55256	1	1	http://tritrypdb.org/gene/TcCLB.509233.230
TcCLB.419469.14	kinesin_putative	-1.70489	1.96e-08	1.35e-08	8.97e-08	4.03753	1	1	http://tritrypdb.org/gene/TcCLB.419469.14
TcCLB.510743.70	lactoylglutathione_lyase-like_protein_putative	-1.70464	1.75e-10	2.12e-10	1.41e-09	6.34709	1	1	http://tritrypdb.org/gene/TcCLB.510743.70
TcCLB.511573.49	hypothetical_protein	-1.70445	6.55e-08	3.95e-08	2.62e-07	4.04107	1	1	http://tritrypdb.org/gene/TcCLB.511573.49
TcCLB.509831.36	mitochondrial_RNA_binding_protein_1_putative	-1.70382	3.09e-13	9.95e-13	6.6e-12	7.0087	1	1	http://tritrypdb.org/gene/TcCLB.509831.36
TcCLB.511803.80	hypothetical_protein_conserved	-1.70305	3.82e-06	1.57e-06	1.04e-05	3.89645	1	1	http://tritrypdb.org/gene/TcCLB.511803.80
TcCLB.505807.110	alkyl-dihydroxyacetone_phosphate_synthase_putative	-1.70117	3.01e-15	2.66e-14	1.77e-13	7.62312	1	1	http://tritrypdb.org/gene/TcCLB.505807.110
TcCLB.509069.30	tubulin_binding_cofactor_A-like_protein_putative	-1.69929	6.72e-09	5.21e-09	3.46e-08	5.33375	1	1	http://tritrypdb.org/gene/TcCLB.509069.30
TcCLB.504867.70	cytochrome_c_oxidase_assembly_protein_putative	-1.69832	2.43e-12	5.65e-12	3.75e-11	6.09235	1	1	http://tritrypdb.org/gene/TcCLB.504867.70
TcCLB.510091.80	pyruvate_dehydrogenase_E1_beta_subunit_putative	-1.69811	2.23e-11	3.59e-11	2.38e-10	7.42713	1	1	http://tritrypdb.org/gene/TcCLB.510091.80
TcCLB.508569.70	hypothetical_protein_conserved	-1.69757	7.67e-08	4.54e-08	3.01e-07	6.23029	1	1	http://tritrypdb.org/gene/TcCLB.508569.70
TcCLB.510963.70	ARP2/3_complex_subunit_putative	-1.69717	2.14e-07	1.14e-07	7.59e-07	4.51347	1	1	http://tritrypdb.org/gene/TcCLB.510963.70
TcCLB.507929.10	kinesin_putative	-1.69654	2.93e-13	9.52e-13	6.32e-12	6.53865	1	1	http://tritrypdb.org/gene/TcCLB.507929.10
TcCLB.507277.20	hypothetical_protein_conserved	-1.69652	3.27e-06	1.36e-06	9.02e-06	3.73679	1	1	http://tritrypdb.org/gene/TcCLB.507277.20
TcCLB.506945.150	hypothetical_protein	-1.69619	1.26e-09	1.19e-09	7.93e-09	4.32426	1	1	http://tritrypdb.org/gene/TcCLB.506945.150
TcCLB.507093.320	hypothetical_protein_conserved	-1.69586	6.79e-13	1.9e-12	1.26e-11	5.56182	1	1	http://tritrypdb.org/gene/TcCLB.507093.320
TcCLB.509167.150	homoserine_kinase_putative	-1.6947	2.16e-12	5.11e-12	3.39e-11	6.43537	1	1	http://tritrypdb.org/gene/TcCLB.509167.150
TcCLB.507669.220	hypothetical_protein_conserved	-1.69423	8.03e-11	1.08e-10	7.19e-10	6.70929	1	1	http://tritrypdb.org/gene/TcCLB.507669.220
TcCLB.511577.100	hypothetical_protein_conserved	-1.69334	1.79e-08	1.24e-08	8.26e-08	5.2795	1	1	http://tritrypdb.org/gene/TcCLB.511577.100
TcCLB.511589.150	hypothetical_protein_conserved	-1.69256	1.94e-07	1.04e-07	6.93e-07	5.51888	1	1	http://tritrypdb.org/gene/TcCLB.511589.150
TcCLB.508647.270	malic_enzyme_putative	-1.69034	4.8e-15	3.9e-14	2.59e-13	7.64856	1	1	http://tritrypdb.org/gene/TcCLB.508647.270
TcCLB.510173.130	hypothetical_protein_conserved	-1.69023	1.29e-10	1.63e-10	1.08e-09	5.7478	1	1	http://tritrypdb.org/gene/TcCLB.510173.130
TcCLB.509067.40	NADH_dehydrogenase_subunit_NI8M_putative	-1.69012	2.06e-12	4.91e-12	3.26e-11	5.72989	1	1	http://tritrypdb.org/gene/TcCLB.509067.40
TcCLB.505945.90	folate/pteridine_transporter_putative	-1.68877	8.61e-13	2.32e-12	1.54e-11	6.82272	1	1	http://tritrypdb.org/gene/TcCLB.505945.90
TcCLB.510089.210	hypothetical_protein_conserved	-1.68844	3.95e-12	8.35e-12	5.54e-11	6.50521	1	1	http://tritrypdb.org/gene/TcCLB.510089.210
TcCLB.506797.100	short_chain_dehydrogenase/reductase_putative	-1.68823	1.37e-14	8.31e-14	5.52e-13	6.54161	1	1	http://tritrypdb.org/gene/TcCLB.506797.100
TcCLB.505365.50	beta_galactofuranosyl_glycosyltransferase_(pseudogene)_putative	-1.6882	3.83e-06	1.57e-06	1.04e-05	4.26993	1	1	http://tritrypdb.org/gene/TcCLB.505365.50
TcCLB.509667.31	hypothetical_protein_conserved_(pseudogene)	-1.68783	0.0073456	0.00170651	0.0113308	3.65168	1	1	http://tritrypdb.org/gene/TcCLB.509667.31
TcCLB.510877.190	hypothetical_protein_conserved	-1.68419	7.03e-07	3.36e-07	2.23e-06	3.90868	1	1	http://tritrypdb.org/gene/TcCLB.510877.190
TcCLB.508813.15	heat_shock_protein_70_putative	-1.68356	2.14e-07	1.14e-07	7.59e-07	8.04241	1	1	http://tritrypdb.org/gene/TcCLB.508813.15
TcCLB.504153.310	heat_shock_protein_putative	-1.68326	3.53e-11	5.26e-11	3.49e-10	9.03476	1	1	http://tritrypdb.org/gene/TcCLB.504153.310
TcCLB.511729.60	hypothetical_protein_conserved	-1.68282	1.07e-12	2.79e-12	1.85e-11	7.32409	1	1	http://tritrypdb.org/gene/TcCLB.511729.60
TcCLB.511751.160	hypothetical_protein_conserved	-1.68274	4.63e-09	3.77e-09	2.5e-08	4.82562	1	1	http://tritrypdb.org/gene/TcCLB.511751.160
TcCLB.508277.65	hypothetical_protein_conserved	-1.68228	3.46e-12	7.5e-12	4.98e-11	7.02432	1	1	http://tritrypdb.org/gene/TcCLB.508277.65
TcCLB.509449.5	receptor-type_adenylate_cyclase_putative	-1.68122	0.00476867	0.00114133	0.00757816	2.02578	1	1	http://tritrypdb.org/gene/TcCLB.509449.5
TcCLB.507227.9	hypothetical_protein_conserved	-1.68111	6.08e-12	1.2e-11	7.94e-11	5.84906	1	1	http://tritrypdb.org/gene/TcCLB.507227.9
TcCLB.504125.50	mitochondrial_carrier_protein_putative	-1.6789	8.5e-13	2.3e-12	1.53e-11	6.4876	1	1	http://tritrypdb.org/gene/TcCLB.504125.50
TcCLB.506735.10	mitochondrial_processing_peptidase_alpha_subunit_putativemetallo-peptidase_Clan_ME_Family_M16_putative	-1.67832	1.76e-14	1.02e-13	6.77e-13	7.78644	1	1	http://tritrypdb.org/gene/TcCLB.506735.10
TcCLB.503873.10	cytochrome-b5_reductase_putative	-1.67674	6.33e-14	2.72e-13	1.81e-12	7.55795	1	1	http://tritrypdb.org/gene/TcCLB.503873.10
TcCLB.511439.60	hypothetical_protein_conserved	-1.67539	9.88e-10	9.61e-10	6.38e-09	5.43564	1	1	http://tritrypdb.org/gene/TcCLB.511439.60
TcCLB.506567.70	NAD(P)-dependent_oxidoreductase_putative	-1.67536	1.82e-12	4.41e-12	2.93e-11	6.41708	1	1	http://tritrypdb.org/gene/TcCLB.506567.70
TcCLB.503789.60	hypothetical_protein_conserved	-1.67473	8.72e-12	1.63e-11	1.08e-10	5.37418	1	1	http://tritrypdb.org/gene/TcCLB.503789.60
TcCLB.509951.10	nucleolar_protein_putative	-1.67248	1.15e-09	1.11e-09	7.34e-09	5.46189	1	1	http://tritrypdb.org/gene/TcCLB.509951.10
TcCLB.508647.170	DNA_polymerase_theta_(polymerase_domain_only)_putative	-1.67155	3.9e-13	1.21e-12	8.06e-12	6.30676	1	1	http://tritrypdb.org/gene/TcCLB.508647.170
TcCLB.506753.164	hypothetical_protein_conserved	-1.67049	1.75e-08	1.22e-08	8.09e-08	4.50943	1	1	http://tritrypdb.org/gene/TcCLB.506753.164
TcCLB.506413.70	hypothetical_protein_conserved	-1.66914	1.33e-11	2.31e-11	1.54e-10	6.88561	1	1	http://tritrypdb.org/gene/TcCLB.506413.70
TcCLB.508975.10	acyl-CoA_dehydrogenase_mitochondrial_precursor_putative	-1.66828	1.06e-12	2.78e-12	1.84e-11	6.75589	1	1	http://tritrypdb.org/gene/TcCLB.508975.10
TcCLB.511327.20	hypothetical_protein	-1.66747	5.13e-09	4.1e-09	2.72e-08	4.25945	1	1	http://tritrypdb.org/gene/TcCLB.511327.20
TcCLB.506543.90	hypothetical_protein_conserved	-1.66653	1.44e-13	5.37e-13	3.57e-12	5.77824	1	1	http://tritrypdb.org/gene/TcCLB.506543.90
TcCLB.407477.40	hypothetical_protein_conserved	-1.66643	8.8e-10	8.71e-10	5.79e-09	5.29063	1	1	http://tritrypdb.org/gene/TcCLB.407477.40
TcCLB.507107.40	32-trans-enoyl-CoA_isomerase_mitochondrial_precursor_putative	-1.66576	2.49e-14	1.3e-13	8.65e-13	7.97499	1	1	http://tritrypdb.org/gene/TcCLB.507107.40
TcCLB.511867.20	hypothetical_protein_conserved	-1.66551	1.8e-12	4.38e-12	2.91e-11	5.92651	1	1	http://tritrypdb.org/gene/TcCLB.511867.20
TcCLB.511351.9	inosine-5'-monophosphate_dehydrogenase_putative	-1.66536	1.48e-07	8.22e-08	5.46e-07	5.88715	1	1	http://tritrypdb.org/gene/TcCLB.511351.9
TcCLB.511577.60	DNA_excision/repair_protein_SNF2_putative	-1.6643	7.49e-15	5.24e-14	3.48e-13	6.68713	1	1	http://tritrypdb.org/gene/TcCLB.511577.60
TcCLB.509551.30	mitochondrial_phosphate_transporter_putative	-1.66325	1.78e-12	4.35e-12	2.89e-11	8.08552	1	1	http://tritrypdb.org/gene/TcCLB.509551.30
TcCLB.510961.50	hypothetical_protein	-1.66182	0.00191586	0.000487885	0.00323944	1.76197	1	1	http://tritrypdb.org/gene/TcCLB.510961.50
TcCLB.508085.10	GMP_synthase_putative	-1.66161	4.17e-09	3.44e-09	2.28e-08	5.35102	1	1	http://tritrypdb.org/gene/TcCLB.508085.10
TcCLB.507939.70	hypothetical_protein	-1.6612	0.000555058	0.000155165	0.00103026	2.19863	1	1	http://tritrypdb.org/gene/TcCLB.507939.70
TcCLB.509245.29	hypothetical_protein_conserved	-1.65966	8.84e-09	6.62e-09	4.4e-08	4.93285	1	1	http://tritrypdb.org/gene/TcCLB.509245.29
TcCLB.447705.9	hypothetical_protein_conserved	-1.65875	1.95e-05	6.94e-06	4.61e-05	5.09872	1	1	http://tritrypdb.org/gene/TcCLB.447705.9
TcCLB.506399.70	hypothetical_protein_conserved	-1.65847	1.49e-12	3.71e-12	2.46e-11	5.30972	1	1	http://tritrypdb.org/gene/TcCLB.506399.70
TcCLB.510517.10	chaperonin/T-complex_protein_1_gamma_subunit_putative	-1.6584	2.46e-14	1.3e-13	8.64e-13	7.06907	1	1	http://tritrypdb.org/gene/TcCLB.510517.10
TcCLB.506861.39	dephospho-CoA_kinase_putative	-1.65767	9.5e-06	3.59e-06	2.38e-05	2.86927	1	1	http://tritrypdb.org/gene/TcCLB.506861.39
TcCLB.508277.200	hypothetical_protein_conserved	-1.65655	4.69e-11	6.72e-11	4.46e-10	5.65593	1	1	http://tritrypdb.org/gene/TcCLB.508277.200
TcCLB.508357.90	T-complex_protein_1_beta_subunit_putative	-1.65649	7.56e-12	1.45e-11	9.6e-11	8.31595	1	1	http://tritrypdb.org/gene/TcCLB.508357.90
TcCLB.507881.60	protein_kinase_putative	-1.65615	7e-10	7.14e-10	4.74e-09	4.21391	1	1	http://tritrypdb.org/gene/TcCLB.507881.60
TcCLB.504009.70	succinate_dehydrogenase_cytochrome_B_subunit	-1.65559	4.87e-10	5.2e-10	3.45e-09	5.65631	1	1	http://tritrypdb.org/gene/TcCLB.504009.70
TcCLB.509759.10	L-ribulokinase_putative	-1.65427	2.07e-07	1.11e-07	7.35e-07	4.15478	1	1	http://tritrypdb.org/gene/TcCLB.509759.10
TcCLB.507669.10	fumarate_hydratase_putative	-1.65385	5.33e-12	1.08e-11	7.17e-11	6.53483	1	1	http://tritrypdb.org/gene/TcCLB.507669.10
TcCLB.508307.170	60S_acidic_ribosomal_protein_putative	-1.65379	9.52e-12	1.76e-11	1.17e-10	5.74106	1	1	http://tritrypdb.org/gene/TcCLB.508307.170
TcCLB.510529.10	hypothetical_protein_conserved	-1.64941	3.28e-11	4.93e-11	3.28e-10	6.22143	1	1	http://tritrypdb.org/gene/TcCLB.510529.10
TcCLB.504431.118	hypothetical_protein_conserved	-1.64728	7.89e-10	7.91e-10	5.25e-09	5.75752	1	1	http://tritrypdb.org/gene/TcCLB.504431.118
TcCLB.506529.50	arginine_N-methyltransferase_putative	-1.64712	7.04e-13	1.96e-12	1.3e-11	6.81476	1	1	http://tritrypdb.org/gene/TcCLB.506529.50
TcCLB.504507.20	DNA_replication_licensing_factor_(pseudogene)_putativeminichromosome_maintenance_protein-like_protein_putative	-1.64574	1.56e-09	1.44e-09	9.53e-09	4.45726	1	1	http://tritrypdb.org/gene/TcCLB.504507.20
TcCLB.510747.140	hypothetical_protein_conserved	-1.64442	4.5e-12	9.36e-12	6.21e-11	5.65115	1	1	http://tritrypdb.org/gene/TcCLB.510747.140
TcCLB.509667.20	tryptophanyl-tRNA_synthetase_(pseudogene)_putative	-1.64339	1.04e-08	7.63e-09	5.07e-08	6.10343	1	1	http://tritrypdb.org/gene/TcCLB.509667.20
TcCLB.506863.4	dephospho-CoA_kinase_putative	-1.64267	6.18e-08	3.75e-08	2.49e-07	3.92492	1	1	http://tritrypdb.org/gene/TcCLB.506863.4
TcCLB.506811.190	UDP-galactose_4-epimerase	-1.64257	2.95e-14	1.48e-13	9.8e-13	6.61072	1	1	http://tritrypdb.org/gene/TcCLB.506811.190
TcCLB.510603.60	protein_tyrosine_phosphatase-like_protein_putative	-1.64222	5.41e-09	4.31e-09	2.86e-08	4.85005	1	1	http://tritrypdb.org/gene/TcCLB.510603.60
TcCLB.506925.160	hypothetical_protein_conserved	-1.64052	1.03e-08	7.53e-09	5e-08	4.75814	1	1	http://tritrypdb.org/gene/TcCLB.506925.160
TcCLB.505807.220	ribosomal_RNA_adenine_dimethylase_family_protein_putative	-1.64012	4.57e-14	2.07e-13	1.37e-12	6.80358	1	1	http://tritrypdb.org/gene/TcCLB.505807.220
TcCLB.506165.16	protein_kinase_putative	-1.63942	5.76e-08	3.52e-08	2.34e-07	4.41224	1	1	http://tritrypdb.org/gene/TcCLB.506165.16
TcCLB.509835.10	hypothetical_protein_conserved	-1.63868	0.00429565	0.00103472	0.00687029	2.25461	1	1	http://tritrypdb.org/gene/TcCLB.509835.10
TcCLB.506933.89	calmodulin_putative	-1.63514	2.52e-08	1.69e-08	1.12e-07	4.01164	1	1	http://tritrypdb.org/gene/TcCLB.506933.89
TcCLB.507037.80	hypothetical_protein_conserved	-1.63445	1.07e-10	1.39e-10	9.22e-10	6.22721	1	1	http://tritrypdb.org/gene/TcCLB.507037.80
TcCLB.511805.10	mannosyl-oligosaccharide_glucosidase_putativeglucosidase_I_putativeprocessing_A-glucosidase_I_putative	-1.6338	2.88e-05	9.97e-06	6.62e-05	3.98911	1	1	http://tritrypdb.org/gene/TcCLB.511805.10
TcCLB.510879.200	hypothetical_protein_conserved	-1.63211	1.07e-09	1.04e-09	6.89e-09	4.93878	1	1	http://tritrypdb.org/gene/TcCLB.510879.200
TcCLB.511579.9	fatty_acyl_CoA_syntetase_1_putative	-1.62814	2.81e-08	1.86e-08	1.24e-07	4.50751	1	1	http://tritrypdb.org/gene/TcCLB.511579.9
TcCLB.503955.100	protein_kinase_putative	-1.62803	6.21e-08	3.77e-08	2.5e-07	5.2018	1	1	http://tritrypdb.org/gene/TcCLB.503955.100
TcCLB.473111.10	lathosterol_oxidase_putative	-1.627	1.02e-07	5.9e-08	3.92e-07	5.63222	1	1	http://tritrypdb.org/gene/TcCLB.473111.10
TcCLB.507837.20	protein_kinase_putative	-1.62515	3.21e-10	3.57e-10	2.37e-09	5.18693	1	1	http://tritrypdb.org/gene/TcCLB.507837.20
TcCLB.505555.20	hypothetical_protein_conserved	-1.62485	2.98e-07	1.54e-07	1.02e-06	4.92714	1	1	http://tritrypdb.org/gene/TcCLB.505555.20
TcCLB.507237.120	mucin-associated_surface_protein_(MASP)_putative	-1.62449	0.000795507	0.000215921	0.00143367	1.65138	1	1	http://tritrypdb.org/gene/TcCLB.507237.120
TcCLB.507735.10	hypothetical_protein_conserved	-1.62419	1.11e-07	6.35e-08	4.22e-07	4.35566	1	1	http://tritrypdb.org/gene/TcCLB.507735.10
TcCLB.509013.19	calpain-like_cysteine_peptidase_putative	-1.62177	1.94e-05	6.9e-06	4.58e-05	3.99456	1	1	http://tritrypdb.org/gene/TcCLB.509013.19
TcCLB.511217.80	hypothetical_protein_conserved	-1.62085	9.77e-09	7.22e-09	4.8e-08	4.56407	1	1	http://tritrypdb.org/gene/TcCLB.511217.80
TcCLB.505229.5	hypothetical_protein_conserved	-1.61982	8.32e-09	6.28e-09	4.17e-08	5.13465	1	1	http://tritrypdb.org/gene/TcCLB.505229.5
TcCLB.510721.10	hypothetical_protein_conserved	-1.61763	9.21e-15	6.13e-14	4.07e-13	7.46294	1	1	http://tritrypdb.org/gene/TcCLB.510721.10
TcCLB.506563.210	calpain-like_cysteine_peptidase_putativecysteine_peptidase_Clan_CA_family_C2_putative	-1.61683	2.37e-11	3.79e-11	2.52e-10	8.04698	1	1	http://tritrypdb.org/gene/TcCLB.506563.210
TcCLB.506963.70	hypothetical_protein_conserved	-1.61219	4.73e-08	2.95e-08	1.96e-07	4.33681	1	1	http://tritrypdb.org/gene/TcCLB.506963.70
TcCLB.511393.70	hypothetical_protein_conserved	-1.61204	5.77e-12	1.15e-11	7.61e-11	6.15094	1	1	http://tritrypdb.org/gene/TcCLB.511393.70
TcCLB.509979.290	trans-sialidase_(pseudogene)_putative	-1.61173	1.35e-07	7.6e-08	5.05e-07	3.38184	1	1	http://tritrypdb.org/gene/TcCLB.509979.290
TcCLB.503789.34	hypothetical_protein_conserved	-1.6086	2.91e-13	9.51e-13	6.31e-12	6.06477	1	1	http://tritrypdb.org/gene/TcCLB.503789.34
TcCLB.510105.170	dihydrolipoamide_acetyltransferase_precursor_putative	-1.60584	8.06e-14	3.31e-13	2.2e-12	7.7794	1	1	http://tritrypdb.org/gene/TcCLB.510105.170
TcCLB.511877.15	elongation_factor_1-gamma_(EF-1-gamma_pseudogene)_putative	-1.60584	1.29e-05	4.76e-06	3.16e-05	4.10231	1	1	http://tritrypdb.org/gene/TcCLB.511877.15
TcCLB.398751.10	hypothetical_protein_conserved	-1.60496	0.000795061	0.000215921	0.00143367	1.98456	1	1	http://tritrypdb.org/gene/TcCLB.398751.10
TcCLB.508539.30	hypothetical_protein_conserved	-1.60165	1.85e-07	9.99e-08	6.63e-07	6.10288	1	1	http://tritrypdb.org/gene/TcCLB.508539.30
TcCLB.503613.40	pterin-4-alpha-carbinolamine_dehydratase_putative	-1.59906	1.09e-11	1.96e-11	1.3e-10	5.93613	1	1	http://tritrypdb.org/gene/TcCLB.503613.40
TcCLB.506363.90	aminoacylase_putativeN-acyl-L-amino_acid_amidohydrolase_putative	-1.59896	1.76e-11	2.95e-11	1.96e-10	6.57886	1	1	http://tritrypdb.org/gene/TcCLB.506363.90
TcCLB.511075.20	notchless_homolog_putative	-1.59675	1.31e-12	3.33e-12	2.21e-11	6.63165	1	1	http://tritrypdb.org/gene/TcCLB.511075.20
TcCLB.506487.37	hypothetical_protein	-1.59618	1.88e-06	8.19e-07	5.44e-06	3.86803	1	1	http://tritrypdb.org/gene/TcCLB.506487.37
TcCLB.503527.4	hypothetical_protein_conserved_(pseudogene)	-1.59508	1.73e-10	2.09e-10	1.39e-09	6.42239	1	1	http://tritrypdb.org/gene/TcCLB.503527.4
TcCLB.510741.205	no_Fct	-1.59065	0.00229896	0.00057751	0.00383454	0.805768	1	1	http://tritrypdb.org/gene/TcCLB.510741.205
TcCLB.509769.10	hypothetical_protein_conserved	-1.58965	1.29e-07	7.28e-08	4.83e-07	4.43628	1	1	http://tritrypdb.org/gene/TcCLB.509769.10
TcCLB.503713.10	hypothetical_protein_conserved	-1.58955	2.54e-08	1.7e-08	1.13e-07	4.94563	1	1	http://tritrypdb.org/gene/TcCLB.503713.10
TcCLB.511217.200	tyrosyl_or_methionyl-tRNA_synthetase_putative	-1.58872	3.75e-13	1.17e-12	7.76e-12	5.97819	1	1	http://tritrypdb.org/gene/TcCLB.511217.200
TcCLB.509707.29	phosphatidylinositol-4-phosphate_5-kinase-like_protein	-1.58292	1.16e-08	8.4e-09	5.58e-08	3.97435	1	1	http://tritrypdb.org/gene/TcCLB.509707.29
TcCLB.506513.7	hypothetical_protein_conserved	-1.58279	1.14e-11	2.04e-11	1.35e-10	5.6548	1	1	http://tritrypdb.org/gene/TcCLB.506513.7
TcCLB.510515.139	T-complex_protein_1_gamma_subunit_putative	-1.58253	4.12e-13	1.27e-12	8.43e-12	6.95148	1	1	http://tritrypdb.org/gene/TcCLB.510515.139
TcCLB.505989.82	ruvB-like_DNA_helicase_putative	-1.58214	1.09e-12	2.82e-12	1.87e-11	7.20519	1	1	http://tritrypdb.org/gene/TcCLB.505989.82
TcCLB.506605.10	hypothetical_protein_conserved	-1.58184	4.18e-06	1.69e-06	1.12e-05	4.96405	1	1	http://tritrypdb.org/gene/TcCLB.506605.10
TcCLB.505009.20	divalent_cation_tolerance_protein_putative	-1.58156	1.26e-08	9.03e-09	6e-08	4.59699	1	1	http://tritrypdb.org/gene/TcCLB.505009.20
TcCLB.506743.80	hypothetical_protein_conserved	-1.58087	1.26e-07	7.14e-08	4.74e-07	3.95698	1	1	http://tritrypdb.org/gene/TcCLB.506743.80
TcCLB.506693.4	elongation_initiation_factor_2_alpha_subunit_putative	-1.57919	1.83e-11	3.04e-11	2.02e-10	6.92605	1	1	http://tritrypdb.org/gene/TcCLB.506693.4
TcCLB.504881.10	hypothetical_protein_conserved	-1.57882	7.03e-05	2.28e-05	0.000151238	4.8232	1	1	http://tritrypdb.org/gene/TcCLB.504881.10
TcCLB.506945.240	ATP_synthase_epsilon_chain_putative	-1.57746	1.94e-12	4.68e-12	3.11e-11	6.88466	1	1	http://tritrypdb.org/gene/TcCLB.506945.240
TcCLB.505983.20	nucleosome_assembly_protein-like_protein_putative	-1.57701	1.76e-09	1.6e-09	1.06e-08	8.15848	1	1	http://tritrypdb.org/gene/TcCLB.505983.20
TcCLB.508989.9	nucleoside_phosphorylase_putative	-1.57641	7.6e-13	2.09e-12	1.39e-11	8.2129	1	1	http://tritrypdb.org/gene/TcCLB.508989.9
TcCLB.509837.30	hypothetical_protein	-1.57555	9.83e-08	5.69e-08	3.78e-07	3.81178	1	1	http://tritrypdb.org/gene/TcCLB.509837.30
TcCLB.503795.10	hypothetical_protein_conserved	-1.57426	0.000183438	5.56e-05	0.000368885	2.66204	1	1	http://tritrypdb.org/gene/TcCLB.503795.10
TcCLB.507939.14	hypothetical_protein_conserved	-1.5739	1.51e-09	1.4e-09	9.3e-09	4.88494	1	1	http://tritrypdb.org/gene/TcCLB.507939.14
TcCLB.511623.20	hypothetical_protein_conserved	-1.5712	3.98e-10	4.33e-10	2.87e-09	5.95116	1	1	http://tritrypdb.org/gene/TcCLB.511623.20
TcCLB.507445.50	myosin_heavy_chain_putative	-1.57056	2.98e-10	3.34e-10	2.21e-09	5.86973	1	1	http://tritrypdb.org/gene/TcCLB.507445.50
TcCLB.511803.40	hypothetical_protein_conserved	-1.56675	7.25e-15	5.18e-14	3.44e-13	7.8813	1	1	http://tritrypdb.org/gene/TcCLB.511803.40
TcCLB.509979.14	peroxisomal_membrane_protein_4_putative	-1.56568	2.72e-09	2.35e-09	1.56e-08	4.9017	1	1	http://tritrypdb.org/gene/TcCLB.509979.14
TcCLB.511393.30	formin_homology_2_(FH2)_domain_protein_putative	-1.56564	1.04e-13	4.1e-13	2.72e-12	6.90091	1	1	http://tritrypdb.org/gene/TcCLB.511393.30
TcCLB.511733.10	aldehyde_dehydrogenase_putative	-1.56551	1.58e-14	9.26e-14	6.15e-13	6.89865	1	1	http://tritrypdb.org/gene/TcCLB.511733.10
TcCLB.507465.10	receptor-type_adenylate_cyclase_putative	-1.56484	5.86e-05	1.92e-05	0.000127727	2.8939	1	1	http://tritrypdb.org/gene/TcCLB.507465.10
TcCLB.511575.120	hypothetical_protein_conserved	-1.56443	1.98e-07	1.06e-07	7.07e-07	5.79117	1	1	http://tritrypdb.org/gene/TcCLB.511575.120
TcCLB.511145.10	cytochrome_c_oxidase_subunit_VI_putative	-1.56313	2e-12	4.79e-12	3.18e-11	7.69353	1	1	http://tritrypdb.org/gene/TcCLB.511145.10
TcCLB.506865.50	hypothetical_protein_conserved	-1.56304	1.74e-11	2.92e-11	1.94e-10	5.90278	1	1	http://tritrypdb.org/gene/TcCLB.506865.50
TcCLB.510839.20	hypothetical_protein	-1.56179	3.49e-11	5.21e-11	3.46e-10	6.56844	1	1	http://tritrypdb.org/gene/TcCLB.510839.20
TcCLB.504077.30	hypothetical_protein_conserved	-1.56103	2.47e-12	5.72e-12	3.79e-11	6.81453	1	1	http://tritrypdb.org/gene/TcCLB.504077.30
TcCLB.506405.120	V-type_ATPase_A_subunit_putative	-1.55913	3.53e-14	1.68e-13	1.12e-12	7.8126	1	1	http://tritrypdb.org/gene/TcCLB.506405.120
TcCLB.506859.80	hypothetical_protein_conserved	-1.55826	4.74e-12	9.79e-12	6.5e-11	6.53107	1	1	http://tritrypdb.org/gene/TcCLB.506859.80
TcCLB.506553.20	hypothetical_protein_conserved	-1.55737	9.96e-13	2.63e-12	1.75e-11	7.09936	1	1	http://tritrypdb.org/gene/TcCLB.506553.20
TcCLB.511527.9	hypothetical_protein_conserved	-1.557	2.08e-05	7.35e-06	4.88e-05	3.59423	1	1	http://tritrypdb.org/gene/TcCLB.511527.9
TcCLB.504033.80	hypothetical_protein_conserved	-1.55662	1.87e-13	6.61e-13	4.39e-12	8.06381	1	1	http://tritrypdb.org/gene/TcCLB.504033.80
TcCLB.511577.83	thioredoxin_putative	-1.55528	1.4e-09	1.32e-09	8.75e-09	4.95738	1	1	http://tritrypdb.org/gene/TcCLB.511577.83
TcCLB.506227.90	hypothetical_protein_conserved	-1.5525	3e-13	9.71e-13	6.45e-12	6.15476	1	1	http://tritrypdb.org/gene/TcCLB.506227.90
TcCLB.508769.10	hypothetical_protein_conserved_(pseudogene)	-1.55216	2.03e-11	3.33e-11	2.21e-10	6.56024	1	1	http://tritrypdb.org/gene/TcCLB.508769.10
TcCLB.504433.10	ADP-ribosylation_factor_3_putative	-1.55144	5.65e-13	1.65e-12	1.09e-11	6.36092	1	1	http://tritrypdb.org/gene/TcCLB.504433.10
TcCLB.503529.10	hypothetical_protein_conserved	-1.55041	1.42e-06	6.37e-07	4.23e-06	3.13758	1	1	http://tritrypdb.org/gene/TcCLB.503529.10
TcCLB.505807.29	hypothetical_protein_conserved	-1.54793	1.57e-06	6.97e-07	4.63e-06	3.72136	1	1	http://tritrypdb.org/gene/TcCLB.505807.29
TcCLB.507093.220	RNA-binding_protein_putative	-1.54666	3.9e-10	4.25e-10	2.82e-09	6.84143	1	1	http://tritrypdb.org/gene/TcCLB.507093.220
TcCLB.511361.50	hypothetical_protein_conserved	-1.54635	3.09e-08	2.02e-08	1.34e-07	4.80898	1	1	http://tritrypdb.org/gene/TcCLB.511361.50
TcCLB.508047.11	trans-sialidase_putative	-1.54603	0.0241672	0.00516659	0.034305	-0.977116	1	1	http://tritrypdb.org/gene/TcCLB.508047.11
TcCLB.508169.20	elongation_factor_2_putative	-1.54559	0.000967886	0.000259212	0.00172111	10.5445	1	1	http://tritrypdb.org/gene/TcCLB.508169.20
TcCLB.508277.130	hypothetical_protein_conserved	-1.54533	1.96e-07	1.06e-07	7.02e-07	4.39436	1	1	http://tritrypdb.org/gene/TcCLB.508277.130
TcCLB.508839.70	hypothetical_protein_conserved	-1.54404	1.63e-09	1.5e-09	9.93e-09	5.58434	1	1	http://tritrypdb.org/gene/TcCLB.508839.70
TcCLB.509885.70	transporter_putative	-1.54186	3.32e-11	4.99e-11	3.32e-10	6.15953	1	1	http://tritrypdb.org/gene/TcCLB.509885.70
TcCLB.505025.50	hypothetical_protein	-1.54078	0.00376906	0.000914302	0.00607076	1.06095	1	1	http://tritrypdb.org/gene/TcCLB.505025.50
TcCLB.510091.20	hypothetical_protein_conserved	-1.54032	3.34e-08	2.17e-08	1.44e-07	4.82177	1	1	http://tritrypdb.org/gene/TcCLB.510091.20
TcCLB.506695.7	hypothetical_protein_conserved	-1.53993	2.04e-08	1.39e-08	9.25e-08	5.14318	1	1	http://tritrypdb.org/gene/TcCLB.506695.7
TcCLB.510145.20	cofilin/actin_depolymerizing_factor_putative	-1.53904	3.54e-11	5.27e-11	3.5e-10	7.50758	1	1	http://tritrypdb.org/gene/TcCLB.510145.20
TcCLB.506543.30	hypothetical_protein_conserved	-1.53903	6.02e-08	3.66e-08	2.43e-07	6.33998	1	1	http://tritrypdb.org/gene/TcCLB.506543.30
TcCLB.507805.30	hypothetical_protein_conserved_(pseudogene)	-1.5389	2.15e-07	1.15e-07	7.6e-07	4.5033	1	1	http://tritrypdb.org/gene/TcCLB.507805.30
TcCLB.507009.30	ribulose-phosphate_3-epimerase_putative	-1.53623	2.39e-10	2.77e-10	1.84e-09	4.47351	1	1	http://tritrypdb.org/gene/TcCLB.507009.30
TcCLB.510603.30	hypothetical_protein_conserved	-1.53428	2.14e-06	9.21e-07	6.12e-06	3.56003	1	1	http://tritrypdb.org/gene/TcCLB.510603.30
TcCLB.430605.10	hypothetical_protein_conserved	-1.53382	2.34e-12	5.49e-12	3.65e-11	7.39522	1	1	http://tritrypdb.org/gene/TcCLB.430605.10
TcCLB.508555.34	hypothetical_protein_conserved	-1.53211	3.47e-09	2.93e-09	1.95e-08	4.37043	1	1	http://tritrypdb.org/gene/TcCLB.508555.34
TcCLB.511075.60	protein_kinase_putative	-1.53112	2.82e-11	4.34e-11	2.88e-10	5.22816	1	1	http://tritrypdb.org/gene/TcCLB.511075.60
TcCLB.507445.30	trans-sialidase_(pseudogene)_putative	-1.52973	3.07e-06	1.28e-06	8.52e-06	3.52957	1	1	http://tritrypdb.org/gene/TcCLB.507445.30
TcCLB.506953.49	glucose-6-phosphate_1-dehydrogenase_putative	-1.52672	3.04e-07	1.57e-07	1.04e-06	4.43469	1	1	http://tritrypdb.org/gene/TcCLB.506953.49
TcCLB.510105.100	UDP-glucose_dehydrogenase_putative	-1.52667	1.4e-13	5.24e-13	3.48e-12	6.97326	1	1	http://tritrypdb.org/gene/TcCLB.510105.100
TcCLB.507669.239	hypothetical_protein_conserved	-1.52592	2.56e-10	2.93e-10	1.95e-09	5.74857	1	1	http://tritrypdb.org/gene/TcCLB.507669.239
TcCLB.508539.20	hypothetical_protein_conserved	-1.52325	3.42e-09	2.89e-09	1.92e-08	4.87013	1	1	http://tritrypdb.org/gene/TcCLB.508539.20
TcCLB.509895.20	hypothetical_protein_conserved	-1.52317	7.1e-13	1.98e-12	1.31e-11	7.58079	1	1	http://tritrypdb.org/gene/TcCLB.509895.20
TcCLB.507669.80	protein_phosphotase_putative	-1.5223	2.21e-12	5.23e-12	3.47e-11	6.06025	1	1	http://tritrypdb.org/gene/TcCLB.507669.80
TcCLB.507711.300	hypothetical_protein_conserved	-1.5218	2.54e-10	2.91e-10	1.93e-09	6.10294	1	1	http://tritrypdb.org/gene/TcCLB.507711.300
TcCLB.509007.40	hypothetical_protein_conserved	-1.51881	0.0270942	0.00574866	0.0381698	0.98498	1	1	http://tritrypdb.org/gene/TcCLB.509007.40
TcCLB.508277.40	hypothetical_protein_conserved	-1.51854	2.86e-13	9.45e-13	6.27e-12	7.42576	1	1	http://tritrypdb.org/gene/TcCLB.508277.40
TcCLB.461165.4	hypothetical_protein_conserved	-1.51581	6.33e-08	3.82e-08	2.54e-07	4.24536	1	1	http://tritrypdb.org/gene/TcCLB.461165.4
TcCLB.511751.120	aldehyde_dehydrogenase_family_putative	-1.51371	2.78e-11	4.3e-11	2.86e-10	5.79462	1	1	http://tritrypdb.org/gene/TcCLB.511751.120
TcCLB.504147.260	hypothetical_protein_conserved	-1.51318	7.79e-10	7.84e-10	5.2e-09	5.50764	1	1	http://tritrypdb.org/gene/TcCLB.504147.260
TcCLB.509157.110	hypothetical_protein_conserved	-1.51304	2.38e-06	1.01e-06	6.73e-06	3.74847	1	1	http://tritrypdb.org/gene/TcCLB.509157.110
TcCLB.503881.50	hypothetical_protein_conserved	-1.51236	1.51e-07	8.34e-08	5.54e-07	3.83417	1	1	http://tritrypdb.org/gene/TcCLB.503881.50
TcCLB.503639.10	inositol-3-phosphate_synthase_putative	-1.51091	2.39e-09	2.09e-09	1.39e-08	6.56052	1	1	http://tritrypdb.org/gene/TcCLB.503639.10
TcCLB.509597.20	carbonic_anhydrase-like_protein_putative	-1.5109	7.33e-13	2.03e-12	1.35e-11	8.01811	1	1	http://tritrypdb.org/gene/TcCLB.509597.20
TcCLB.506933.20	ribonucleoside-diphosphate_reductase_large_chain_putative	-1.51088	1.06e-06	4.87e-07	3.23e-06	5.33602	1	1	http://tritrypdb.org/gene/TcCLB.506933.20
TcCLB.509599.150	serine/threonine_protein_kinase_putative	-1.51038	5.56e-11	7.8e-11	5.18e-10	6.20831	1	1	http://tritrypdb.org/gene/TcCLB.509599.150
TcCLB.510149.80	ABC_transporter_putative	-1.50994	1.54e-09	1.43e-09	9.47e-09	9.9498	1	1	http://tritrypdb.org/gene/TcCLB.510149.80
TcCLB.503859.60	hypothetical_protein_conserved_(pseudogene)	-1.50988	0.0450585	0.0092046	0.0611164	-0.417552	1	0	http://tritrypdb.org/gene/TcCLB.503859.60
TcCLB.510939.9	hypothetical_protein_conserved	-1.509	1.62e-08	1.13e-08	7.52e-08	4.80033	1	1	http://tritrypdb.org/gene/TcCLB.510939.9
TcCLB.484299.10	trypanothione_reductase_putative	-1.50856	4.57e-11	6.56e-11	4.36e-10	6.43465	1	1	http://tritrypdb.org/gene/TcCLB.484299.10
TcCLB.506401.180	hypothetical_protein_conserved	-1.50734	1.32e-15	1.37e-14	9.11e-14	7.6625	1	1	http://tritrypdb.org/gene/TcCLB.506401.180
TcCLB.509099.89	hypothetical_protein_conserved	-1.5067	2.92e-12	6.55e-12	4.35e-11	6.41521	1	1	http://tritrypdb.org/gene/TcCLB.509099.89
TcCLB.506147.60	3-demethylubiquinone-9_3-methyltransferase_putative	-1.5063	8.17e-12	1.55e-11	1.03e-10	6.23736	1	1	http://tritrypdb.org/gene/TcCLB.506147.60
TcCLB.506401.280	hypothetical_protein_conserved	-1.50433	2.4e-08	1.61e-08	1.07e-07	4.99579	1	1	http://tritrypdb.org/gene/TcCLB.506401.280
TcCLB.511529.210	hypothetical_protein_conserved	-1.50384	1.36e-11	2.36e-11	1.57e-10	6.97652	1	1	http://tritrypdb.org/gene/TcCLB.511529.210
TcCLB.510999.39	40S_ribosomal_protein_S3A_putative	-1.50371	0.00031476	9.16e-05	0.000608524	8.38434	1	1	http://tritrypdb.org/gene/TcCLB.510999.39
TcCLB.506699.3	hypothetical_protein_conserved	-1.50363	4.16e-09	3.43e-09	2.28e-08	5.22241	1	1	http://tritrypdb.org/gene/TcCLB.506699.3
TcCLB.506025.50	vacuolar_ATP_synthase_subunit_b_putative	-1.50327	1.95e-11	3.21e-11	2.13e-10	7.4918	1	1	http://tritrypdb.org/gene/TcCLB.506025.50
TcCLB.509633.60	serine/threonine-protein_phosphatase_PP1_putative	-1.5024	2e-07	1.08e-07	7.14e-07	4.04073	1	1	http://tritrypdb.org/gene/TcCLB.509633.60
TcCLB.507667.20	hypothetical_protein_conserved	-1.5018	3.21e-12	7.03e-12	4.67e-11	8.26835	1	1	http://tritrypdb.org/gene/TcCLB.507667.20
TcCLB.511467.16	hypothetical_protein_conserved	-1.50059	3.01e-07	1.55e-07	1.03e-06	4.5105	1	1	http://tritrypdb.org/gene/TcCLB.511467.16
TcCLB.504147.70	hypothetical_protein_conserved	-1.49905	1.88e-10	2.25e-10	1.49e-09	5.9477	1	1	http://tritrypdb.org/gene/TcCLB.504147.70
TcCLB.506961.97	N-acetyltransferase_complex_ARD1_subunit_(pseudogene)_putative	-1.49759	1.47e-05	5.34e-06	3.55e-05	3.06258	1	1	http://tritrypdb.org/gene/TcCLB.506961.97
TcCLB.506405.43	hypothetical_protein_conserved	-1.49734	2.4e-10	2.77e-10	1.84e-09	4.50393	1	1	http://tritrypdb.org/gene/TcCLB.506405.43
TcCLB.511071.90	hypothetical_protein	-1.49682	5.71e-09	4.52e-09	3e-08	4.14962	1	1	http://tritrypdb.org/gene/TcCLB.511071.90
TcCLB.506147.80	hypothetical_protein_conserved	-1.49594	2.77e-11	4.29e-11	2.85e-10	6.43628	1	1	http://tritrypdb.org/gene/TcCLB.506147.80
TcCLB.511537.8	ABC_transporter_putative	-1.49441	7.7e-10	7.76e-10	5.15e-09	5.08104	1	1	http://tritrypdb.org/gene/TcCLB.511537.8
TcCLB.504129.10	hypothetical_protein_conserved	-1.49338	1.9e-07	1.03e-07	6.82e-07	4.68654	1	1	http://tritrypdb.org/gene/TcCLB.504129.10
TcCLB.510531.70	hypothetical_protein_conserved	-1.49218	1.45e-10	1.8e-10	1.19e-09	5.22924	1	1	http://tritrypdb.org/gene/TcCLB.510531.70
TcCLB.511753.9	hypothetical_protein_conserved	-1.49161	7.77e-09	5.92e-09	3.93e-08	4.65776	1	1	http://tritrypdb.org/gene/TcCLB.511753.9
TcCLB.511801.34	hypothetical_protein_conserved	-1.49072	2.32e-11	3.72e-11	2.47e-10	5.65371	1	1	http://tritrypdb.org/gene/TcCLB.511801.34
TcCLB.503841.10	proteasome_activator_protein_pa26_putative	-1.49062	1.35e-10	1.7e-10	1.13e-09	6.15248	1	1	http://tritrypdb.org/gene/TcCLB.503841.10
TcCLB.510345.9	protein_kinase_putative	-1.49009	5.08e-05	1.68e-05	0.000111633	3.97989	1	1	http://tritrypdb.org/gene/TcCLB.510345.9
TcCLB.508609.10	surface_protease_GP63_putative	-1.4898	1.08e-11	1.95e-11	1.29e-10	5.41195	1	1	http://tritrypdb.org/gene/TcCLB.508609.10
TcCLB.507927.20	mitochondrial_oligo_U_binding_protein_TBRGG1_putative	-1.48964	8.22e-12	1.56e-11	1.03e-10	7.92848	1	1	http://tritrypdb.org/gene/TcCLB.507927.20
TcCLB.506591.90	hypothetical_protein_conserved	-1.48931	0.000524356	0.000147078	0.000976564	2.66454	1	1	http://tritrypdb.org/gene/TcCLB.506591.90
TcCLB.511715.90	hypothetical_protein_conserved	-1.48576	4.92e-09	3.96e-09	2.63e-08	4.96415	1	1	http://tritrypdb.org/gene/TcCLB.511715.90
TcCLB.510105.135	no_Fct	-1.48545	0.0283923	0.00600548	0.039875	0.410763	1	1	http://tritrypdb.org/gene/TcCLB.510105.135
TcCLB.504881.40	hypothetical_protein_conserved	-1.48407	8.79e-12	1.64e-11	1.09e-10	6.32198	1	1	http://tritrypdb.org/gene/TcCLB.504881.40
TcCLB.509551.60	hypothetical_protein_conserved	-1.48295	0.000178317	5.41e-05	0.000359485	4.15368	1	1	http://tritrypdb.org/gene/TcCLB.509551.60
TcCLB.510343.15	protein_kinase_putative	-1.47991	1.06e-05	3.97e-06	2.64e-05	3.26142	1	1	http://tritrypdb.org/gene/TcCLB.510343.15
TcCLB.511797.260	mucin-associated_surface_protein_(MASP_pseudogene)_putative	-1.47977	0.000515746	0.000144895	0.00096207	1.6741	1	1	http://tritrypdb.org/gene/TcCLB.511797.260
TcCLB.430895.16	hypothetical_protein_conserved	-1.47971	1.14e-07	6.54e-08	4.34e-07	4.61388	1	1	http://tritrypdb.org/gene/TcCLB.430895.16
TcCLB.507639.20	universal_minicircle_sequence_binding_protein_(UMSBP)_putative	-1.4789	2.21e-08	1.5e-08	9.96e-08	6.39352	1	1	http://tritrypdb.org/gene/TcCLB.507639.20
TcCLB.506925.120	eukaryotic_initiation_factor_5a_putative	-1.47806	3.42e-10	3.78e-10	2.51e-09	8.04612	1	1	http://tritrypdb.org/gene/TcCLB.506925.120
TcCLB.482971.9	dispersed_gene_family_protein_1_(DGF-1)_putative	-1.47751	0.000578852	0.000161244	0.00107062	2.39244	1	1	http://tritrypdb.org/gene/TcCLB.482971.9
TcCLB.503885.60	hypothetical_protein_conserved	-1.47724	4.17e-11	6.09e-11	4.04e-10	6.16349	1	1	http://tritrypdb.org/gene/TcCLB.503885.60
TcCLB.511691.39	hypothetical_protein_conserved	-1.477	1.96e-11	3.22e-11	2.14e-10	6.51222	1	1	http://tritrypdb.org/gene/TcCLB.511691.39
TcCLB.506979.30	hypothetical_protein	-1.47646	0.00729742	0.00169657	0.0112648	2.93971	1	1	http://tritrypdb.org/gene/TcCLB.506979.30
TcCLB.506715.59	Monooxygenase_putative	-1.47386	2.85e-06	1.2e-06	7.94e-06	3.29988	1	1	http://tritrypdb.org/gene/TcCLB.506715.59
TcCLB.511731.30	serine/threonine_protein_phosphatase_putative	-1.47338	4.95e-11	7.08e-11	4.7e-10	6.08469	1	1	http://tritrypdb.org/gene/TcCLB.511731.30
TcCLB.510841.30	hypothetical_protein	-1.47305	2.03e-05	7.18e-06	4.77e-05	3.62872	1	1	http://tritrypdb.org/gene/TcCLB.510841.30
TcCLB.506945.80	DNA_ligase_I_putative	-1.47253	2.22e-11	3.59e-11	2.38e-10	6.7206	1	1	http://tritrypdb.org/gene/TcCLB.506945.80
TcCLB.510719.260	hslvu_complex_proteolytic_subunit-like_putativethreonine_peptidase_clan_T(1)_family_T1B_putative	-1.47189	2.84e-11	4.36e-11	2.89e-10	6.65185	1	1	http://tritrypdb.org/gene/TcCLB.510719.260
TcCLB.506925.64	hypothetical_protein_conserved	-1.47057	1.35e-11	2.35e-11	1.56e-10	6.12925	1	1	http://tritrypdb.org/gene/TcCLB.506925.64
TcCLB.507641.50	hypothetical_protein_conserved	-1.47006	5.3e-12	1.08e-11	7.14e-11	6.51368	1	1	http://tritrypdb.org/gene/TcCLB.507641.50
TcCLB.509499.10	cyclophilin_putativePPIase_putativerotamase_putativepeptidyl-prolyl_cis-trans_isomerase_putative	-1.46909	5.47e-12	1.1e-11	7.31e-11	7.09622	1	1	http://tritrypdb.org/gene/TcCLB.509499.10
TcCLB.418069.10	heat_shock_protein_70_(hsp70)_putative	-1.46762	3.29e-12	7.17e-12	4.76e-11	9.30613	1	1	http://tritrypdb.org/gene/TcCLB.418069.10
TcCLB.510855.20	hypothetical_protein_conserved	-1.46583	4.56e-11	6.56e-11	4.36e-10	5.8466	1	1	http://tritrypdb.org/gene/TcCLB.510855.20
TcCLB.511531.40	chaperonin_alpha_subunit_putative	-1.46579	6.34e-12	1.24e-11	8.22e-11	8.39146	1	1	http://tritrypdb.org/gene/TcCLB.511531.40
TcCLB.507669.84	ATP-dependent_DEAD/H_RNA_helicase_putative	-1.46489	2.7e-12	6.15e-12	4.08e-11	7.40755	1	1	http://tritrypdb.org/gene/TcCLB.507669.84
TcCLB.508539.40	hypothetical_protein_conserved	-1.46447	1.84e-07	9.95e-08	6.61e-07	5.44466	1	1	http://tritrypdb.org/gene/TcCLB.508539.40
TcCLB.504035.130	hypothetical_protein_conserved	-1.46377	4.97e-12	1.01e-11	6.72e-11	5.75326	1	1	http://tritrypdb.org/gene/TcCLB.504035.130
TcCLB.508539.10	hypothetical_protein_conserved	-1.46228	9.85e-06	3.71e-06	2.46e-05	4.13608	1	1	http://tritrypdb.org/gene/TcCLB.508539.10
TcCLB.504181.50	T-complex_protein_1_delta_subunit_putative	-1.4622	5.59e-14	2.46e-13	1.63e-12	7.16056	1	1	http://tritrypdb.org/gene/TcCLB.504181.50
TcCLB.509967.189	kinesin_putative	-1.46208	6.31e-10	6.52e-10	4.33e-09	5.15117	1	1	http://tritrypdb.org/gene/TcCLB.509967.189
TcCLB.506947.70	hypothetical_protein_conserved	-1.46206	1.71e-09	1.55e-09	1.03e-08	5.29124	1	1	http://tritrypdb.org/gene/TcCLB.506947.70
TcCLB.506801.90	hypothetical_protein_conserved	-1.46127	5.46e-11	7.68e-11	5.1e-10	5.79661	1	1	http://tritrypdb.org/gene/TcCLB.506801.90
TcCLB.509167.20	3-hydroxy-3-methylglutaryl-CoA_reductase_putative	-1.46096	3.67e-14	1.74e-13	1.16e-12	7.46432	1	1	http://tritrypdb.org/gene/TcCLB.509167.20
TcCLB.506625.80	cAMP-specific_phosphodiesterase_putative	-1.46087	8.01e-10	8e-10	5.31e-09	7.14711	1	1	http://tritrypdb.org/gene/TcCLB.506625.80
TcCLB.511753.60	ESAG8-associated_protein_putative	-1.46031	4.18e-07	2.09e-07	1.39e-06	4.43248	1	1	http://tritrypdb.org/gene/TcCLB.511753.60
TcCLB.507011.150	hypothetical_protein_conserved	-1.45873	1.08e-09	1.04e-09	6.89e-09	5.81084	1	1	http://tritrypdb.org/gene/TcCLB.507011.150
TcCLB.503903.60	hypothetical_protein_conserved	-1.45855	3.07e-13	9.9e-13	6.58e-12	6.70051	1	1	http://tritrypdb.org/gene/TcCLB.503903.60
TcCLB.508169.90	eukaryotic_translation_initiation_factor_3_(eIF-3)_interacting_protein_putative	-1.4571	6.36e-13	1.81e-12	1.2e-11	7.79751	1	1	http://tritrypdb.org/gene/TcCLB.508169.90
TcCLB.509829.20	isovaleryl-coA_dehydrogenase_putative	-1.45704	1.8e-08	1.25e-08	8.28e-08	5.52948	1	1	http://tritrypdb.org/gene/TcCLB.509829.20
TcCLB.508317.30	hypothetical_protein	-1.45601	2.05e-10	2.42e-10	1.61e-09	6.89448	1	1	http://tritrypdb.org/gene/TcCLB.508317.30
TcCLB.510773.50	hypothetical_protein	-1.45491	9.17e-06	3.48e-06	2.31e-05	3.58537	1	1	http://tritrypdb.org/gene/TcCLB.510773.50
TcCLB.510593.49	kinetoplast_DNA-associated_protein_putative	-1.45455	9.82e-11	1.29e-10	8.55e-10	7.39715	1	1	http://tritrypdb.org/gene/TcCLB.510593.49
TcCLB.511337.4	hypothetical_protein_conserved	-1.45322	6.71e-06	2.62e-06	1.74e-05	3.84253	1	1	http://tritrypdb.org/gene/TcCLB.511337.4
TcCLB.511309.20	hydrolase-like_protein_putative	-1.45174	1.6e-07	8.8e-08	5.85e-07	4.66842	1	1	http://tritrypdb.org/gene/TcCLB.511309.20
TcCLB.505943.79	retrotransposon_hot_spot_protein_(RHS_pseudogene)_putative	-1.45018	0.00351395	0.000857566	0.00569404	1.83027	1	1	http://tritrypdb.org/gene/TcCLB.505943.79
TcCLB.503651.49	hypothetical_protein_conserved_(pseudogene)	-1.44842	1.09e-08	7.95e-09	5.28e-08	4.6699	1	1	http://tritrypdb.org/gene/TcCLB.503651.49
TcCLB.511715.100	pumilio/PUF_RNA_binding_protein_7_putative	-1.44807	8.87e-12	1.65e-11	1.1e-10	6.57207	1	1	http://tritrypdb.org/gene/TcCLB.511715.100
TcCLB.503975.60	hypothetical_protein	-1.44703	2.86e-09	2.47e-09	1.64e-08	5.84267	1	1	http://tritrypdb.org/gene/TcCLB.503975.60
TcCLB.506457.40	hypoxanthine-guanine_phosphoribosyltransferase_putative	-1.4458	5.74e-09	4.54e-09	3.01e-08	6.7114	1	1	http://tritrypdb.org/gene/TcCLB.506457.40
TcCLB.509267.30	hypothetical_protein_conserved	-1.44521	1.22e-08	8.77e-09	5.83e-08	4.62838	1	1	http://tritrypdb.org/gene/TcCLB.509267.30
TcCLB.508839.30	trafficking_protein_particle_complex_subunit_3_putative	-1.44479	8.81e-09	6.6e-09	4.38e-08	4.62893	1	1	http://tritrypdb.org/gene/TcCLB.508839.30
TcCLB.503671.10	aminopeptidase_putativemetallo-peptidase_clan_MA(E)_family_M1_putative	-1.44414	8.71e-13	2.34e-12	1.55e-11	6.9431	1	1	http://tritrypdb.org/gene/TcCLB.503671.10
TcCLB.507089.270	dihydrolipoyl_dehydrogenase_putative	-1.44355	9.33e-10	9.15e-10	6.07e-09	8.31342	1	1	http://tritrypdb.org/gene/TcCLB.507089.270
TcCLB.506227.110	hypothetical_protein_conserved	-1.44344	1.28e-05	4.74e-06	3.14e-05	5.63132	1	1	http://tritrypdb.org/gene/TcCLB.506227.110
TcCLB.504423.20	electon_transport_protein_SCO1/SCO2_putative	-1.43841	2.78e-11	4.3e-11	2.86e-10	6.30032	1	1	http://tritrypdb.org/gene/TcCLB.504423.20
TcCLB.510257.139	transcription_activator_putative	-1.43726	2.33e-09	2.05e-09	1.36e-08	5.87878	1	1	http://tritrypdb.org/gene/TcCLB.510257.139
TcCLB.504203.4	hypothetical_protein_conserved	-1.4372	2.61e-10	2.97e-10	1.97e-09	5.42759	1	1	http://tritrypdb.org/gene/TcCLB.504203.4
TcCLB.509625.20	hypothetical_protein_conserved	-1.43681	5.65e-07	2.75e-07	1.83e-06	4.65629	1	1	http://tritrypdb.org/gene/TcCLB.509625.20
TcCLB.510311.190	hypothetical_protein_conserved	-1.4365	2.55e-08	1.71e-08	1.13e-07	5.35169	1	1	http://tritrypdb.org/gene/TcCLB.510311.190
TcCLB.509767.120	hypothetical_protein_conserved	-1.43601	6e-13	1.73e-12	1.15e-11	6.37487	1	1	http://tritrypdb.org/gene/TcCLB.509767.120
TcCLB.510349.60	hypothetical_protein_conserved	-1.43594	1.26e-07	7.12e-08	4.73e-07	4.2827	1	1	http://tritrypdb.org/gene/TcCLB.510349.60
TcCLB.510759.10	hypothetical_protein_conserved	-1.43457	1.54e-09	1.43e-09	9.47e-09	5.30569	1	1	http://tritrypdb.org/gene/TcCLB.510759.10
TcCLB.503819.10	hypothetical_protein_conserved	-1.43297	1.4e-12	3.54e-12	2.35e-11	6.99185	1	1	http://tritrypdb.org/gene/TcCLB.503819.10
TcCLB.505965.30	prenyltransferase_putative	-1.43276	2.33e-12	5.47e-12	3.64e-11	6.25304	1	1	http://tritrypdb.org/gene/TcCLB.505965.30
TcCLB.509817.50	trans-sialidase_putative	-1.4305	2e-08	1.37e-08	9.11e-08	4.80734	1	1	http://tritrypdb.org/gene/TcCLB.509817.50
TcCLB.511215.60	hypothetical_protein_conserved	-1.4291	6.77e-06	2.64e-06	1.75e-05	3.84753	1	1	http://tritrypdb.org/gene/TcCLB.511215.60
TcCLB.509967.70	katanin_putative	-1.42754	0.00286217	0.000708488	0.0047042	2.92363	1	1	http://tritrypdb.org/gene/TcCLB.509967.70
TcCLB.510491.70	hypothetical_protein	-1.42588	2.02e-06	8.76e-07	5.82e-06	4.03362	1	1	http://tritrypdb.org/gene/TcCLB.510491.70
TcCLB.506753.240	hypothetical_protein_conserved	-1.4253	5.23e-09	4.18e-09	2.77e-08	5.15797	1	1	http://tritrypdb.org/gene/TcCLB.506753.240
TcCLB.504125.100	sugar_transporter_(pseudogene)_putativesugar_transporter_putative_frameshift	-1.42494	2e-06	8.65e-07	5.74e-06	6.70993	1	1	http://tritrypdb.org/gene/TcCLB.504125.100
TcCLB.510255.29	hypothetical_protein_conserved	-1.42478	8.8e-10	8.71e-10	5.79e-09	5.99071	1	1	http://tritrypdb.org/gene/TcCLB.510255.29
TcCLB.506683.19	GMP_synthase_(pseudogene)_putative	-1.42259	7.09e-08	4.23e-08	2.81e-07	5.94872	1	1	http://tritrypdb.org/gene/TcCLB.506683.19
TcCLB.510349.50	CDP-diacylglycerol--inositol_3-phosphatidyltransferase_putative	-1.42171	2.92e-08	1.93e-08	1.28e-07	5.33362	1	1	http://tritrypdb.org/gene/TcCLB.510349.50
TcCLB.506603.46	hypothetical_protein_conserved_(pseudogene)	-1.42118	2.17e-05	7.64e-06	5.07e-05	3.84512	1	1	http://tritrypdb.org/gene/TcCLB.506603.46
TcCLB.511395.10	hypothetical_protein_conserved	-1.42086	3.98e-10	4.33e-10	2.87e-09	5.76118	1	1	http://tritrypdb.org/gene/TcCLB.511395.10
TcCLB.510763.109	rRNA_processing_protein_putative	-1.41773	1.07e-11	1.93e-11	1.28e-10	6.09848	1	1	http://tritrypdb.org/gene/TcCLB.510763.109
TcCLB.507093.69	hypothetical_protein_conserved	-1.41737	7.23e-07	3.44e-07	2.29e-06	4.49202	1	1	http://tritrypdb.org/gene/TcCLB.507093.69
TcCLB.503425.5	mitochondrial_carrier_protein_putative	-1.4154	1.04e-05	3.92e-06	2.6e-05	3.39911	1	1	http://tritrypdb.org/gene/TcCLB.503425.5
TcCLB.506407.100	hypothetical_protein_conserved	-1.41503	9.87e-13	2.61e-12	1.74e-11	6.8691	1	1	http://tritrypdb.org/gene/TcCLB.506407.100
TcCLB.506503.80	kinesin_putative	-1.41464	5.75e-13	1.67e-12	1.11e-11	9.21131	1	1	http://tritrypdb.org/gene/TcCLB.506503.80
TcCLB.509951.40	hypothetical_protein	-1.41363	1.12e-07	6.42e-08	4.26e-07	5.57367	1	1	http://tritrypdb.org/gene/TcCLB.509951.40
TcCLB.507709.13	no_Fct	-1.41316	0.0279765	0.00592629	0.0393492	-0.930447	1	1	http://tritrypdb.org/gene/TcCLB.507709.13
TcCLB.510755.60	ADP-ribosylation_factor_1_putative	-1.41245	5.82e-08	3.55e-08	2.36e-07	6.79211	1	1	http://tritrypdb.org/gene/TcCLB.510755.60
TcCLB.506605.59	adenosine_5'-monophosphoramidase_putative	-1.41212	2.62e-12	5.99e-12	3.98e-11	6.24715	1	1	http://tritrypdb.org/gene/TcCLB.506605.59
TcCLB.511071.100	hypothetical_protein_conserved	-1.41135	1.47e-11	2.53e-11	1.68e-10	6.62605	1	1	http://tritrypdb.org/gene/TcCLB.511071.100
TcCLB.511211.70	cytochrome_oxidase_assembly_protein_putative	-1.4105	8.39e-11	1.12e-10	7.46e-10	6.68848	1	1	http://tritrypdb.org/gene/TcCLB.511211.70
TcCLB.509233.50	hypothetical_protein_conserved	-1.40919	1.38e-12	3.49e-12	2.32e-11	7.93013	1	1	http://tritrypdb.org/gene/TcCLB.509233.50
TcCLB.510255.4	hypothetical_protein_conserved	-1.4084	2.36e-07	1.25e-07	8.28e-07	4.03228	1	1	http://tritrypdb.org/gene/TcCLB.510255.4
TcCLB.510181.9	inositol-3-phosphate_synthase_putative	-1.40836	1.68e-08	1.17e-08	7.78e-08	6.48869	1	1	http://tritrypdb.org/gene/TcCLB.510181.9
TcCLB.506135.40	hypothetical_protein_conserved	-1.40721	6.05e-13	1.74e-12	1.15e-11	7.26874	1	1	http://tritrypdb.org/gene/TcCLB.506135.40
TcCLB.507669.20	hypothetical_protein_conserved	-1.40719	5.83e-09	4.59e-09	3.05e-08	6.61621	1	1	http://tritrypdb.org/gene/TcCLB.507669.20
TcCLB.503557.30	hypothetical_protein_conserved	-1.40684	4.35e-10	4.69e-10	3.12e-09	5.80319	1	1	http://tritrypdb.org/gene/TcCLB.503557.30
TcCLB.511181.150	hypothetical_protein_conserved	-1.40581	1.68e-08	1.17e-08	7.76e-08	5.75762	1	1	http://tritrypdb.org/gene/TcCLB.511181.150
TcCLB.508647.140	minichromosome_maintenance_(MCM)_complex_subunit_putative	-1.40547	2.99e-10	3.35e-10	2.23e-09	6.7144	1	1	http://tritrypdb.org/gene/TcCLB.508647.140
TcCLB.511589.70	ADP-ribosylation_factor_GTPase_activating_protein_putative	-1.40492	4.49e-12	9.36e-12	6.21e-11	6.13836	1	1	http://tritrypdb.org/gene/TcCLB.511589.70
TcCLB.503397.5	N-acetyltransferase_complex_ARD1_subunit_(pseudogene)_putative	-1.40406	0.0180096	0.00392924	0.0260893	0.781787	1	1	http://tritrypdb.org/gene/TcCLB.503397.5
TcCLB.508973.69	hypothetical_protein_conserved	-1.40402	2.58e-07	1.35e-07	8.95e-07	5.17232	1	1	http://tritrypdb.org/gene/TcCLB.508973.69
TcCLB.507485.60	hypothetical_protein_conserved	-1.40321	1.04e-08	7.61e-09	5.05e-08	6.7065	1	1	http://tritrypdb.org/gene/TcCLB.507485.60
TcCLB.511751.260	hypothetical_protein_conserved	-1.40221	1.28e-06	5.77e-07	3.83e-06	4.5167	1	1	http://tritrypdb.org/gene/TcCLB.511751.260
TcCLB.511805.15	ribosomal_protein_S29_putative	-1.40204	2.21e-10	2.58e-10	1.72e-09	6.25567	1	1	http://tritrypdb.org/gene/TcCLB.511805.15
TcCLB.511469.40	hypothetical_protein_conserved	-1.40059	1.79e-12	4.36e-12	2.9e-11	7.10483	1	1	http://tritrypdb.org/gene/TcCLB.511469.40
TcCLB.506797.120	hypothetical_protein_conserved	-1.40026	2.16e-07	1.15e-07	7.64e-07	6.64238	1	1	http://tritrypdb.org/gene/TcCLB.506797.120
TcCLB.510101.80	hypothetical_protein_conserved	-1.40015	4.62e-05	1.54e-05	0.0001024	4.27331	1	1	http://tritrypdb.org/gene/TcCLB.510101.80
TcCLB.507993.36	hypothetical_protein_conserved	-1.39939	1.22e-08	8.78e-09	5.83e-08	5.10015	1	1	http://tritrypdb.org/gene/TcCLB.507993.36
TcCLB.508357.100	hypothetical_protein_conserved	-1.39661	7.48e-11	1.02e-10	6.75e-10	6.95137	1	1	http://tritrypdb.org/gene/TcCLB.508357.100
TcCLB.509127.50	mitochondrial_carrier_protein_putative	-1.39645	8.38e-12	1.58e-11	1.05e-10	7.18011	1	1	http://tritrypdb.org/gene/TcCLB.509127.50
TcCLB.506943.4	aldehyde_dehydrogenase_putative	-1.39477	2.16e-14	1.21e-13	8.03e-13	7.36897	1	1	http://tritrypdb.org/gene/TcCLB.506943.4
TcCLB.508555.10	hypothetical_protein_conserved	-1.39433	0.000210299	6.29e-05	0.000417922	3.44413	1	1	http://tritrypdb.org/gene/TcCLB.508555.10
TcCLB.511871.10	hypothetical_protein_conserved	-1.39326	5.54e-07	2.7e-07	1.79e-06	4.96067	1	1	http://tritrypdb.org/gene/TcCLB.511871.10
TcCLB.506739.150	60S_ribosomal_protein_L13a_putative	-1.39253	1.76e-10	2.12e-10	1.41e-09	9.22511	1	1	http://tritrypdb.org/gene/TcCLB.506739.150
TcCLB.506363.110	RNA_editing_ligase_putativeRNA_editing_complex_protein_putative	-1.39101	1.04e-10	1.36e-10	9.03e-10	5.91822	1	1	http://tritrypdb.org/gene/TcCLB.506363.110
TcCLB.506579.30	myo-inositol-1_phosphatase_putative	-1.39052	8.37e-11	1.12e-10	7.45e-10	6.21866	1	1	http://tritrypdb.org/gene/TcCLB.506579.30
TcCLB.504041.4	RNA_polymerase_I	-1.38931	2.22e-06	9.53e-07	6.32e-06	4.35248	1	1	http://tritrypdb.org/gene/TcCLB.504041.4
TcCLB.470169.9	hypothetical_protein_conserved	-1.38901	3.93e-09	3.26e-09	2.17e-08	4.68424	1	1	http://tritrypdb.org/gene/TcCLB.470169.9
TcCLB.506797.30	hypothetical_protein	-1.38862	4.55e-14	2.07e-13	1.37e-12	7.55452	1	1	http://tritrypdb.org/gene/TcCLB.506797.30
TcCLB.509551.149	phosphatidylserine_decarboxylase_putative	-1.38619	1.8e-07	9.78e-08	6.49e-07	4.58094	1	1	http://tritrypdb.org/gene/TcCLB.509551.149
TcCLB.506865.4	hypothetical_protein_conserved	-1.38611	1.91e-08	1.32e-08	8.74e-08	4.57834	1	1	http://tritrypdb.org/gene/TcCLB.506865.4
TcCLB.506203.50	DnaJ_chaperone_protein_putative	-1.38561	7.44e-12	1.43e-11	9.48e-11	6.16398	1	1	http://tritrypdb.org/gene/TcCLB.506203.50
TcCLB.508647.260	hypothetical_protein_conserved	-1.38505	1.4e-08	9.97e-09	6.62e-08	5.76275	1	1	http://tritrypdb.org/gene/TcCLB.508647.260
TcCLB.507993.40	hypothetical_protein_conserved	-1.3848	1.23e-10	1.57e-10	1.04e-09	6.99276	1	1	http://tritrypdb.org/gene/TcCLB.507993.40
TcCLB.407477.44	hypothetical_protein_conserved	-1.38464	4.48e-07	2.22e-07	1.48e-06	4.365	1	1	http://tritrypdb.org/gene/TcCLB.407477.44
TcCLB.510313.10	hypothetical_protein_conserved	-1.38371	0.018714	0.00406867	0.027015	0.490137	1	1	http://tritrypdb.org/gene/TcCLB.510313.10
TcCLB.401041.10	retrotransposon_hot_spot_protein_(RHS_pseudogene)_putative	-1.38368	0.00142398	0.000370773	0.00246185	3.01943	1	1	http://tritrypdb.org/gene/TcCLB.401041.10
TcCLB.504129.50	hypothetical_protein_conserved_(pseudogene)	-1.38188	8.37e-06	3.21e-06	2.13e-05	4.78654	1	1	http://tritrypdb.org/gene/TcCLB.504129.50
TcCLB.510295.30	RNA_editing_complex_protein_MP18_putative	-1.38159	3.77e-12	8.07e-12	5.36e-11	6.10447	1	1	http://tritrypdb.org/gene/TcCLB.510295.30
TcCLB.504077.50	hypothetical_protein_conserved	-1.38107	1.3e-07	7.34e-08	4.87e-07	4.63691	1	1	http://tritrypdb.org/gene/TcCLB.504077.50
TcCLB.507091.4	fucose_kinase_putative	-1.37955	7.27e-09	5.56e-09	3.69e-08	4.77799	1	1	http://tritrypdb.org/gene/TcCLB.507091.4
TcCLB.510533.120	translation_initiation_factor_IF-2_putative	-1.37942	1.45e-12	3.64e-12	2.42e-11	6.72083	1	1	http://tritrypdb.org/gene/TcCLB.510533.120
TcCLB.507077.50	hypothetical_protein_conserved	-1.37644	8.6e-09	6.47e-09	4.3e-08	5.42646	1	1	http://tritrypdb.org/gene/TcCLB.507077.50
TcCLB.510721.16	no_Fct	-1.3763	0.0610923	0.0121614	0.080749	-0.940949	1	0	http://tritrypdb.org/gene/TcCLB.510721.16
TcCLB.507093.44	dynein_light_chain_putative	-1.37588	2.9e-08	1.92e-08	1.27e-07	5.16701	1	1	http://tritrypdb.org/gene/TcCLB.507093.44
TcCLB.508209.120	10_kDa_heat_shock_protein_putative	-1.37543	1.13e-08	8.2e-09	5.44e-08	8.18351	1	1	http://tritrypdb.org/gene/TcCLB.508209.120
TcCLB.503953.40	hypothetical_protein_conserved	-1.37398	5.72e-07	2.78e-07	1.85e-06	5.0879	1	1	http://tritrypdb.org/gene/TcCLB.503953.40
TcCLB.509965.370	adenosine_kinase_putative	-1.37393	5.93e-13	1.72e-12	1.14e-11	7.18366	1	1	http://tritrypdb.org/gene/TcCLB.509965.370
TcCLB.508277.150	proliferative_cell_nuclear_antigen_(PCNA)_putative	-1.37339	5e-11	7.12e-11	4.73e-10	7.26539	1	1	http://tritrypdb.org/gene/TcCLB.508277.150
TcCLB.439307.9	hypothetical_protein_conserved	-1.37193	0.0110315	0.0024919	0.0165456	2.25008	1	1	http://tritrypdb.org/gene/TcCLB.439307.9
TcCLB.504883.50	hypothetical_protein_conserved	-1.37173	8.68e-12	1.63e-11	1.08e-10	6.5497	1	1	http://tritrypdb.org/gene/TcCLB.504883.50
TcCLB.510773.60	hypothetical_protein	-1.37059	7.55e-06	2.92e-06	1.94e-05	3.59759	1	1	http://tritrypdb.org/gene/TcCLB.510773.60
TcCLB.506181.104	actyltransferase-like_protein	-1.37043	2.2e-10	2.57e-10	1.7e-09	5.28189	1	1	http://tritrypdb.org/gene/TcCLB.506181.104
TcCLB.508647.120	hypothetical_protein_conserved	-1.37013	8.87e-12	1.65e-11	1.1e-10	6.5946	1	1	http://tritrypdb.org/gene/TcCLB.508647.120
TcCLB.510751.4	aminopeptidase_P_putative	-1.36889	1.08e-10	1.39e-10	9.25e-10	7.41882	1	1	http://tritrypdb.org/gene/TcCLB.510751.4
TcCLB.509831.40	hypothetical_protein_conserved	-1.36718	5.79e-10	6.07e-10	4.03e-09	5.82777	1	1	http://tritrypdb.org/gene/TcCLB.509831.40
TcCLB.508831.80	hypothetical_protein_conserved	-1.367	6.79e-08	4.07e-08	2.7e-07	4.5859	1	1	http://tritrypdb.org/gene/TcCLB.508831.80
TcCLB.506567.77	hypothetical_protein_conserved_(pseudogene)	-1.36674	7.98e-06	3.07e-06	2.04e-05	3.4692	1	1	http://tritrypdb.org/gene/TcCLB.506567.77
TcCLB.506801.10	surface_protease_GP63_(pseudogene)_putative	-1.3664	0.00130279	0.00034119	0.00226542	2.29191	1	1	http://tritrypdb.org/gene/TcCLB.506801.10
TcCLB.509167.30	hypothetical_protein_conserved	-1.36618	8.08e-07	3.81e-07	2.53e-06	5.13531	1	1	http://tritrypdb.org/gene/TcCLB.509167.30
TcCLB.506925.420	hypothetical_protein_conserved	-1.36558	1.52e-08	1.07e-08	7.1e-08	4.77091	1	1	http://tritrypdb.org/gene/TcCLB.506925.420
TcCLB.506457.20	hypothetical_protein_conserved	-1.36502	1.17e-09	1.12e-09	7.45e-09	5.36134	1	1	http://tritrypdb.org/gene/TcCLB.506457.20
TcCLB.413977.10	hypothetical_protein_conserved	-1.3613	3.12e-11	4.74e-11	3.14e-10	7.07246	1	1	http://tritrypdb.org/gene/TcCLB.413977.10
TcCLB.511751.191	hypothetical_protein_(pseudogene)	-1.36102	8.09e-09	6.12e-09	4.06e-08	5.67777	1	1	http://tritrypdb.org/gene/TcCLB.511751.191
TcCLB.508345.9	CLC-type_chloride_channel_(pseudogene)_putative	-1.3604	0.00010979	3.45e-05	0.00022915	3.7726	1	1	http://tritrypdb.org/gene/TcCLB.508345.9
TcCLB.506147.130	hypothetical_protein_conserved	-1.3594	5.42e-08	3.33e-08	2.21e-07	5.1276	1	1	http://tritrypdb.org/gene/TcCLB.506147.130
TcCLB.503557.40	hypothetical_protein_conserved	-1.3589	1.09e-08	7.96e-09	5.28e-08	4.99157	1	1	http://tritrypdb.org/gene/TcCLB.503557.40
TcCLB.510777.10	hypothetical_protein_conserved	-1.35813	1.38e-10	1.73e-10	1.15e-09	5.47492	1	1	http://tritrypdb.org/gene/TcCLB.510777.10
TcCLB.509669.160	hypothetical_protein_conserved	-1.35742	5.42e-11	7.65e-11	5.08e-10	7.03011	1	1	http://tritrypdb.org/gene/TcCLB.509669.160
TcCLB.503425.10	hypothetical_protein_conserved	-1.35721	8.95e-10	8.85e-10	5.87e-09	5.30757	1	1	http://tritrypdb.org/gene/TcCLB.503425.10
TcCLB.509465.10	hypothetical_protein_conserved	-1.35707	2.2e-06	9.44e-07	6.27e-06	3.88007	1	1	http://tritrypdb.org/gene/TcCLB.509465.10
TcCLB.439653.10	NADH-dependent_fumarate_reductase_putative	-1.35633	0.00012972	4.04e-05	0.000267969	3.53484	1	1	http://tritrypdb.org/gene/TcCLB.439653.10
TcCLB.504229.37	hypothetical_protein	-1.35583	5.26e-05	1.74e-05	0.000115434	3.69169	1	1	http://tritrypdb.org/gene/TcCLB.504229.37
TcCLB.509455.140	cyclin_putative	-1.35564	5.12e-09	4.1e-09	2.72e-08	5.31657	1	1	http://tritrypdb.org/gene/TcCLB.509455.140
TcCLB.507867.70	prefoldin_subunit_putative	-1.35561	1.72e-08	1.2e-08	7.94e-08	4.92682	1	1	http://tritrypdb.org/gene/TcCLB.507867.70
TcCLB.510611.60	nitroreductase	-1.35471	4.45e-11	6.44e-11	4.27e-10	5.86083	1	1	http://tritrypdb.org/gene/TcCLB.510611.60
TcCLB.510325.69	aminopeptidase_putative	-1.35398	3.45e-13	1.08e-12	7.18e-12	7.34131	1	1	http://tritrypdb.org/gene/TcCLB.510325.69
TcCLB.507963.79	nucleosome_assembly_protein_putative	-1.35346	2.26e-12	5.34e-12	3.54e-11	7.57552	1	1	http://tritrypdb.org/gene/TcCLB.507963.79
TcCLB.420495.19	hypothetical_protein_conserved_(pseudogene)	-1.35136	6.47e-07	3.12e-07	2.07e-06	3.8923	1	1	http://tritrypdb.org/gene/TcCLB.420495.19
TcCLB.509103.30	hypothetical_protein_conserved	-1.35085	0.00105649	0.000280936	0.00186535	4.02481	1	1	http://tritrypdb.org/gene/TcCLB.509103.30
TcCLB.508569.80	phosphoacetylglucosamine_mutase_putativeacetylglucosaminephosphomutase_putativeN-acetylglucosamine-phosphate_mutase_putative	-1.35062	9.58e-14	3.83e-13	2.54e-12	6.64992	1	1	http://tritrypdb.org/gene/TcCLB.508569.80
TcCLB.503975.70	hypothetical_protein_conserved	-1.35059	3.25e-10	3.6e-10	2.39e-09	5.47404	1	1	http://tritrypdb.org/gene/TcCLB.503975.70
TcCLB.511589.180	hypothetical_protein_conserved	-1.35044	1.69e-09	1.54e-09	1.02e-08	6.4035	1	1	http://tritrypdb.org/gene/TcCLB.511589.180
TcCLB.506269.90	mucin_TcMUCII_putative	-1.35038	0.00257649	0.000641905	0.0042621	2.71541	1	1	http://tritrypdb.org/gene/TcCLB.506269.90
TcCLB.510285.60	ubiquinone_biosynthesis_methyltransferase_putative	-1.35027	6.07e-11	8.39e-11	5.57e-10	6.71804	1	1	http://tritrypdb.org/gene/TcCLB.510285.60
TcCLB.508307.150	hypothetical_protein_conserved	-1.34976	1.5e-09	1.39e-09	9.24e-09	5.94087	1	1	http://tritrypdb.org/gene/TcCLB.508307.150
TcCLB.511071.190	hypothetical_protein_conserved	-1.34919	1.22e-07	6.9e-08	4.58e-07	7.10394	1	1	http://tritrypdb.org/gene/TcCLB.511071.190
TcCLB.508373.10	glutamine_dependent_carbamoyl-phosphate_synthase_putativeGATase-CPSase_putative	-1.34888	4.9e-10	5.23e-10	3.47e-09	8.21241	1	1	http://tritrypdb.org/gene/TcCLB.508373.10
TcCLB.507091.30	succinate_dehydrogenase_subunit	-1.3486	3.58e-07	1.81e-07	1.2e-06	5.46782	1	1	http://tritrypdb.org/gene/TcCLB.507091.30
TcCLB.511577.4	CLC-type_chloride_channel_putative	-1.34811	2.34e-07	1.24e-07	8.22e-07	4.37076	1	1	http://tritrypdb.org/gene/TcCLB.511577.4
TcCLB.509231.30	hypothetical_protein	-1.34798	1.71e-06	7.54e-07	5.01e-06	4.72121	1	1	http://tritrypdb.org/gene/TcCLB.509231.30
TcCLB.509769.66	hypothetical_protein_conserved	-1.34735	1.42e-08	1e-08	6.67e-08	4.70452	1	1	http://tritrypdb.org/gene/TcCLB.509769.66
TcCLB.504153.180	UDP-N-acetylglucosamine_pyrophosphorylase_putative	-1.34615	1.48e-09	1.38e-09	9.16e-09	5.4156	1	1	http://tritrypdb.org/gene/TcCLB.504153.180
TcCLB.506227.190	hypothetical_protein	-1.34562	9.59e-05	3.05e-05	0.000202204	3.77292	1	1	http://tritrypdb.org/gene/TcCLB.506227.190
TcCLB.511393.88	hypothetical_protein_conserved	-1.34504	1.48e-08	1.04e-08	6.93e-08	6.0762	1	1	http://tritrypdb.org/gene/TcCLB.511393.88
TcCLB.510173.80	hypothetical_protein	-1.34444	0.000492481	0.000138804	0.000921629	5.02982	1	1	http://tritrypdb.org/gene/TcCLB.510173.80
TcCLB.506863.20	hypothetical_protein	-1.34422	4.69e-08	2.93e-08	1.95e-07	5.44921	1	1	http://tritrypdb.org/gene/TcCLB.506863.20
TcCLB.506661.10	fatty_acid_elongase_putative	-1.34399	2.47e-08	1.66e-08	1.1e-07	6.18991	1	1	http://tritrypdb.org/gene/TcCLB.506661.10
TcCLB.503477.10	hypothetical_protein_conserved	-1.34344	5.23e-07	2.56e-07	1.7e-06	4.86608	1	1	http://tritrypdb.org/gene/TcCLB.503477.10
TcCLB.510347.50	hypothetical_protein_conserved	-1.34331	5.64e-11	7.88e-11	5.24e-10	6.43169	1	1	http://tritrypdb.org/gene/TcCLB.510347.50
TcCLB.508277.230	nucleolar_RNA_binding_protein_putative	-1.34123	9.18e-12	1.7e-11	1.13e-10	8.08335	1	1	http://tritrypdb.org/gene/TcCLB.508277.230
TcCLB.509805.90	hypothetical_protein_conserved	-1.34114	4.26e-11	6.19e-11	4.11e-10	6.09403	1	1	http://tritrypdb.org/gene/TcCLB.509805.90
TcCLB.505025.144	hypothetical_protein_conserved	-1.34062	6.22e-06	2.44e-06	1.62e-05	3.34626	1	1	http://tritrypdb.org/gene/TcCLB.505025.144
TcCLB.511545.90	hypothetical_protein	-1.34029	8.45e-08	4.96e-08	3.29e-07	5.03704	1	1	http://tritrypdb.org/gene/TcCLB.511545.90
TcCLB.445869.10	hypothetical_protein_conserved	-1.33948	1.25e-08	8.99e-09	5.97e-08	5.9931	1	1	http://tritrypdb.org/gene/TcCLB.445869.10
TcCLB.447255.4	ubiquitin_putative	-1.33832	4.7e-09	3.81e-09	2.53e-08	5.49018	1	1	http://tritrypdb.org/gene/TcCLB.447255.4
TcCLB.508779.90	structural_maintenance_of_chromosome_protein_4_putative	-1.33739	4.17e-12	8.77e-12	5.82e-11	6.76531	1	1	http://tritrypdb.org/gene/TcCLB.508779.90
TcCLB.506949.50	cytochrome_c_putative	-1.3359	2.4e-10	2.77e-10	1.84e-09	7.0746	1	1	http://tritrypdb.org/gene/TcCLB.506949.50
TcCLB.507521.110	pumilio/PUF_RNA_binding_protein_5_putative	-1.3352	1.04e-10	1.36e-10	9.03e-10	7.28682	1	1	http://tritrypdb.org/gene/TcCLB.507521.110
TcCLB.510311.199	hypothetical_protein_conserved	-1.33496	0.0344435	0.00718225	0.0476885	1.73997	1	1	http://tritrypdb.org/gene/TcCLB.510311.199
TcCLB.504099.80	dispersed_gene_family_protein_1_(DGF-1_pseudogene)_putative	-1.33363	0.0450975	0.00921008	0.0611528	-0.412044	1	0	http://tritrypdb.org/gene/TcCLB.504099.80
TcCLB.506519.85	no_Fct	-1.33323	0.00444525	0.00106818	0.00709244	1.31328	1	1	http://tritrypdb.org/gene/TcCLB.506519.85
TcCLB.505123.4	ATP-dependent_RNA_helicase_putative	-1.33266	1.47e-09	1.37e-09	9.11e-09	6.37183	1	1	http://tritrypdb.org/gene/TcCLB.505123.4
TcCLB.506563.10	pumilio/PUF_RNA_binding_protein_9_putative	-1.33233	3.29e-12	7.17e-12	4.76e-11	7.01593	1	1	http://tritrypdb.org/gene/TcCLB.506563.10
TcCLB.439307.19	hypothetical_protein_conserved	-1.33222	0.0547706	0.0110143	0.0731323	1.37104	1	0	http://tritrypdb.org/gene/TcCLB.439307.19
TcCLB.510761.4	hypothetical_protein_conserved	-1.33109	1.84e-08	1.27e-08	8.44e-08	5.43751	1	1	http://tritrypdb.org/gene/TcCLB.510761.4
TcCLB.508387.40	hypothetical_protein_conserved	-1.33089	4.89e-08	3.04e-08	2.02e-07	4.95646	1	1	http://tritrypdb.org/gene/TcCLB.508387.40
TcCLB.509965.50	hypothetical_protein_conserved	-1.3307	1.37e-07	7.66e-08	5.09e-07	4.70788	1	1	http://tritrypdb.org/gene/TcCLB.509965.50
TcCLB.510283.43	no_Fct	-1.32974	0.0845507	0.0164043	0.108921	0.0733977	1	0	http://tritrypdb.org/gene/TcCLB.510283.43
TcCLB.506411.39	CDP-diacylglycerol_synthetase_putative	-1.32969	1.55e-06	6.9e-07	4.58e-06	4.28938	1	1	http://tritrypdb.org/gene/TcCLB.506411.39
TcCLB.506825.200	hypothetical_protein	-1.32966	3.24e-13	1.03e-12	6.82e-12	8.89583	1	1	http://tritrypdb.org/gene/TcCLB.506825.200
TcCLB.506797.80	hypothetical_protein_conserved	-1.32661	6.59e-11	9.07e-11	6.02e-10	5.72577	1	1	http://tritrypdb.org/gene/TcCLB.506797.80
TcCLB.509775.49	ribosomal_protein_L2_putative	-1.32601	1.93e-07	1.04e-07	6.92e-07	4.02428	1	1	http://tritrypdb.org/gene/TcCLB.509775.49
TcCLB.511619.5	FtsJ_cell_division_protein_putative	-1.32557	1.46e-09	1.36e-09	9.06e-09	5.93165	1	1	http://tritrypdb.org/gene/TcCLB.511619.5
TcCLB.456139.10	hypothetical_protein_conserved	-1.32455	5.72e-07	2.78e-07	1.85e-06	3.82724	1	1	http://tritrypdb.org/gene/TcCLB.456139.10
TcCLB.510105.240	short_chain_3-hydroxyacyl-CoA_dehydrogenase_putative	-1.3238	1.97e-12	4.73e-12	3.14e-11	7.55119	1	1	http://tritrypdb.org/gene/TcCLB.510105.240
TcCLB.447255.10	hypothetical_protein_conserved	-1.32337	2.64e-10	3.01e-10	2e-09	7.20419	1	1	http://tritrypdb.org/gene/TcCLB.447255.10
TcCLB.503885.50	hypothetical_protein_conserved	-1.3232	9.32e-11	1.23e-10	8.17e-10	5.96864	1	1	http://tritrypdb.org/gene/TcCLB.503885.50
TcCLB.510143.17	hypothetical_protein_conserved	-1.32238	7.7e-08	4.55e-08	3.02e-07	6.01695	1	1	http://tritrypdb.org/gene/TcCLB.510143.17
TcCLB.510105.33	RNA-binding_protein_putative	-1.32129	3.43e-05	1.17e-05	7.76e-05	4.04879	1	1	http://tritrypdb.org/gene/TcCLB.510105.33
TcCLB.505007.10	RNA-binding_protein_putative	-1.31885	8.88e-08	5.19e-08	3.44e-07	4.38915	1	1	http://tritrypdb.org/gene/TcCLB.505007.10
TcCLB.506529.680	retrotransposon_hot_spot_(RHS)_protein_putative	-1.31821	0.0550543	0.0110671	0.073483	3.0553	1	0	http://tritrypdb.org/gene/TcCLB.506529.680
TcCLB.445281.9	calpain-like_cysteine_peptidase_putative	-1.31792	6.87e-05	2.23e-05	0.000148073	3.75143	1	1	http://tritrypdb.org/gene/TcCLB.445281.9
TcCLB.510535.10	hypothetical_protein_conserved	-1.31746	6.38e-07	3.08e-07	2.04e-06	6.27473	1	1	http://tritrypdb.org/gene/TcCLB.510535.10
TcCLB.507011.269	6-phosphogluconate_dehydrogenase_decarboxylating	-1.31624	3.77e-08	2.41e-08	1.6e-07	5.31415	1	1	http://tritrypdb.org/gene/TcCLB.507011.269
TcCLB.419703.20	ubiquitin_carboxyl-terminal_hydrolase_putativecysteine_peptidase_Clan_CA_family_C12_putative	-1.3153	9.81e-11	1.29e-10	8.54e-10	5.91234	1	1	http://tritrypdb.org/gene/TcCLB.419703.20
TcCLB.511527.82	hypothetical_protein_conserved	-1.31518	7.48e-08	4.43e-08	2.94e-07	4.49214	1	1	http://tritrypdb.org/gene/TcCLB.511527.82
TcCLB.506243.135	hypothetical_protein_conserved_(pseudogene)	-1.3138	3.95e-06	1.61e-06	1.07e-05	4.30368	1	1	http://tritrypdb.org/gene/TcCLB.506243.135
TcCLB.510861.110	hypothetical_protein	-1.31325	4.35e-10	4.69e-10	3.12e-09	5.98652	1	1	http://tritrypdb.org/gene/TcCLB.510861.110
TcCLB.510609.34	hypothetical_protein_conserved	-1.31186	4.95e-09	3.98e-09	2.64e-08	5.96993	1	1	http://tritrypdb.org/gene/TcCLB.510609.34
TcCLB.511393.49	hypothetical_protein_conserved	-1.31084	3.16e-09	2.69e-09	1.79e-08	5.93803	1	1	http://tritrypdb.org/gene/TcCLB.511393.49
TcCLB.506401.200	hypothetical_protein_conserved	-1.31061	2.53e-08	1.69e-08	1.12e-07	5.61683	1	1	http://tritrypdb.org/gene/TcCLB.506401.200
TcCLB.509769.140	hypothetical_protein_conserved	-1.31012	1.19e-07	6.79e-08	4.51e-07	4.52701	1	1	http://tritrypdb.org/gene/TcCLB.509769.140
TcCLB.507883.109	mitochondrial_malate_dehydrogenase_putative	-1.30894	4.1e-11	5.99e-11	3.97e-10	8.49633	1	1	http://tritrypdb.org/gene/TcCLB.507883.109
TcCLB.511211.200	hypothetical_protein_conserved	-1.30838	4.17e-12	8.77e-12	5.82e-11	6.26264	1	1	http://tritrypdb.org/gene/TcCLB.511211.200
TcCLB.511211.120	activated_protein_kinase_C_receptor_putativeguanine_nucleotide-binding_protein_beta_subunit-like_protein_putative	-1.30786	2.41e-09	2.11e-09	1.4e-08	9.00266	1	1	http://tritrypdb.org/gene/TcCLB.511211.120
TcCLB.503881.4	hypothetical_protein_conserved	-1.30761	7.47e-06	2.89e-06	1.92e-05	3.66627	1	1	http://tritrypdb.org/gene/TcCLB.503881.4
TcCLB.511001.40	hypothetical_protein	-1.30761	1.01e-08	7.41e-09	4.92e-08	5.74862	1	1	http://tritrypdb.org/gene/TcCLB.511001.40
TcCLB.432787.10	hypothetical_protein_conserved_(pseudogene)	-1.30731	8.9e-09	6.65e-09	4.42e-08	5.67635	1	1	http://tritrypdb.org/gene/TcCLB.432787.10
TcCLB.506811.50	hypothetical_protein_conserved	-1.30723	0.000142688	4.4e-05	0.000292218	3.62495	1	1	http://tritrypdb.org/gene/TcCLB.506811.50
TcCLB.505843.24	succinate_dehydrogenase_putative	-1.30628	6.6e-12	1.28e-11	8.53e-11	6.54036	1	1	http://tritrypdb.org/gene/TcCLB.505843.24
TcCLB.506739.110	hypothetical_protein	-1.30626	3.04e-08	1.99e-08	1.32e-07	5.46183	1	1	http://tritrypdb.org/gene/TcCLB.506739.110
TcCLB.509965.290	p22_protein_precursor_putative	-1.30535	2.71e-11	4.22e-11	2.8e-10	7.73143	1	1	http://tritrypdb.org/gene/TcCLB.509965.290
TcCLB.507927.100	hypothetical_protein	-1.30435	8.33e-11	1.12e-10	7.43e-10	7.2871	1	1	http://tritrypdb.org/gene/TcCLB.507927.100
TcCLB.503749.5	pyrroline-5-carboxylate_synthetase-like_protein_putative	-1.30357	2.71e-08	1.8e-08	1.2e-07	5.73714	1	1	http://tritrypdb.org/gene/TcCLB.503749.5
TcCLB.506739.99	hypothetical_protein_conserved	-1.30315	1.46e-11	2.52e-11	1.67e-10	7.32614	1	1	http://tritrypdb.org/gene/TcCLB.506739.99
TcCLB.506163.40	vacuolar_type_h_ATPase_subunit_putative	-1.30269	7.95e-09	6.04e-09	4.01e-08	5.93338	1	1	http://tritrypdb.org/gene/TcCLB.506163.40
TcCLB.506885.340	hypothetical_protein_conserved	-1.30205	2.39e-14	1.28e-13	8.51e-13	7.47697	1	1	http://tritrypdb.org/gene/TcCLB.506885.340
TcCLB.510175.110	trans-sialidase_(pseudogene)_putative	-1.30202	1.84e-06	8.06e-07	5.35e-06	3.91657	1	1	http://tritrypdb.org/gene/TcCLB.510175.110
TcCLB.507709.14	no_Fct	-1.3008	0.0883414	0.0170956	0.113511	-0.505812	1	0	http://tritrypdb.org/gene/TcCLB.507709.14
TcCLB.503885.10	hypothetical_protein_conserved	-1.30003	5.2e-10	5.51e-10	3.66e-09	5.84713	1	1	http://tritrypdb.org/gene/TcCLB.503885.10
TcCLB.507395.10	dihydroceramide_synthase_putative	-1.29952	4.72e-08	2.95e-08	1.96e-07	6.26756	1	1	http://tritrypdb.org/gene/TcCLB.507395.10
TcCLB.507813.10	structural_maintenance_of_chromosome_3_protein_putative	-1.29936	6.34e-08	3.83e-08	2.54e-07	5.48328	1	1	http://tritrypdb.org/gene/TcCLB.507813.10
TcCLB.507529.58	hypothetical_protein_conserved	-1.29808	0.0157054	0.0034633	0.0229955	2.0542	1	1	http://tritrypdb.org/gene/TcCLB.507529.58
TcCLB.511357.9	hypothetical_protein_conserved	-1.29774	1.98e-10	2.36e-10	1.57e-09	5.43435	1	1	http://tritrypdb.org/gene/TcCLB.511357.9
TcCLB.509203.40	glycosomal_membrane_protein_putative	-1.29716	3.4e-10	3.76e-10	2.49e-09	8.56236	1	1	http://tritrypdb.org/gene/TcCLB.509203.40
TcCLB.506769.90	surface_protease_GP63_putative	-1.29655	0.0910585	0.0175674	0.116644	1.45336	1	0	http://tritrypdb.org/gene/TcCLB.506769.90
TcCLB.510595.49	hypothetical_protein_conserved	-1.29628	8.03e-09	6.08e-09	4.04e-08	6.29476	1	1	http://tritrypdb.org/gene/TcCLB.510595.49
TcCLB.510285.140	hypothetical_protein_conserved	-1.29549	9.16e-06	3.47e-06	2.31e-05	3.52548	1	1	http://tritrypdb.org/gene/TcCLB.510285.140
TcCLB.507641.64	hypothetical_protein_conserved	-1.29515	2.88e-10	3.25e-10	2.15e-09	6.84543	1	1	http://tritrypdb.org/gene/TcCLB.507641.64
TcCLB.508373.20	dihydroorotase_putative	-1.29452	1.15e-08	8.33e-09	5.53e-08	5.64748	1	1	http://tritrypdb.org/gene/TcCLB.508373.20
TcCLB.510761.44	cyclophilin-like_protein_putative	-1.29444	2.45e-11	3.88e-11	2.58e-10	6.35467	1	1	http://tritrypdb.org/gene/TcCLB.510761.44
TcCLB.504881.20	hypothetical_protein_conserved	-1.29397	8.3e-12	1.57e-11	1.04e-10	6.56608	1	1	http://tritrypdb.org/gene/TcCLB.504881.20
TcCLB.511127.330	protein_kinase_putative	-1.29385	2.56e-07	1.34e-07	8.87e-07	5.08249	1	1	http://tritrypdb.org/gene/TcCLB.511127.330
TcCLB.503467.20	hypothetical_protein_conserved	-1.29316	2.23e-09	1.97e-09	1.31e-08	5.59241	1	1	http://tritrypdb.org/gene/TcCLB.503467.20
TcCLB.505807.20	hypothetical_protein_conserved	-1.29301	1.84e-11	3.05e-11	2.02e-10	6.42926	1	1	http://tritrypdb.org/gene/TcCLB.505807.20
TcCLB.510855.4	hypothetical_protein_conserved	-1.29258	1.73e-09	1.58e-09	1.05e-08	5.33199	1	1	http://tritrypdb.org/gene/TcCLB.510855.4
TcCLB.510431.340	hypothetical_protein_conserved	-1.29231	1.32e-07	7.43e-08	4.93e-07	5.045	1	1	http://tritrypdb.org/gene/TcCLB.510431.340
TcCLB.509233.180	ATPase_beta_subunit_putative	-1.29199	3.9e-08	2.49e-08	1.65e-07	9.07043	1	1	http://tritrypdb.org/gene/TcCLB.509233.180
TcCLB.504431.20	hypothetical_protein	-1.29185	1.7e-07	9.31e-08	6.18e-07	4.95514	1	1	http://tritrypdb.org/gene/TcCLB.504431.20
TcCLB.509649.20	hypothetical_protein	-1.29185	3.16e-10	3.52e-10	2.34e-09	6.7918	1	1	http://tritrypdb.org/gene/TcCLB.509649.20
TcCLB.503799.4	protein_kinase_putative	-1.29103	2.9e-08	1.91e-08	1.27e-07	5.6515	1	1	http://tritrypdb.org/gene/TcCLB.503799.4
TcCLB.508647.190	hypothetical_protein_conserved	-1.29082	3.12e-09	2.66e-09	1.77e-08	5.87352	1	1	http://tritrypdb.org/gene/TcCLB.508647.190
TcCLB.506215.10	hypothetical_protein	-1.29056	7.09e-05	2.29e-05	0.000152256	3.60107	1	1	http://tritrypdb.org/gene/TcCLB.506215.10
TcCLB.397937.5	N-acetylglucosamine-6-phosphate_deacetylase-like_protein_putative	-1.29053	8.73e-11	1.16e-10	7.71e-10	5.87925	1	1	http://tritrypdb.org/gene/TcCLB.397937.5
TcCLB.511871.40	hypothetical_protein_conserved	-1.28996	3.44e-09	2.9e-09	1.93e-08	5.68378	1	1	http://tritrypdb.org/gene/TcCLB.511871.40
TcCLB.506773.140	DNA_ligase_putative	-1.28992	2.11e-11	3.43e-11	2.28e-10	6.44516	1	1	http://tritrypdb.org/gene/TcCLB.506773.140
TcCLB.504153.160	carboxypeptidase_putativemetallo-peptidase_clan_MA(E)_family_M32_putative	-1.28992	2.87e-13	9.48e-13	6.29e-12	7.87798	1	1	http://tritrypdb.org/gene/TcCLB.504153.160
TcCLB.509231.39	hypothetical_protein_conserved	-1.28869	1.75e-07	9.5e-08	6.31e-07	5.91707	1	1	http://tritrypdb.org/gene/TcCLB.509231.39
TcCLB.507641.240	hypothetical_protein	-1.28838	1.8e-05	6.43e-06	4.27e-05	4.10862	1	1	http://tritrypdb.org/gene/TcCLB.507641.240
TcCLB.504427.240	metallo-beta-lactamase-like_protein_putative	-1.28806	1.67e-09	1.52e-09	1.01e-08	5.2631	1	1	http://tritrypdb.org/gene/TcCLB.504427.240
TcCLB.503779.30	hypothetical_protein_conserved	-1.28804	1.85e-07	9.99e-08	6.63e-07	4.72469	1	1	http://tritrypdb.org/gene/TcCLB.503779.30
TcCLB.509233.239	hypothetical_protein_conserved	-1.2848	1.53e-06	6.79e-07	4.51e-06	3.66921	1	1	http://tritrypdb.org/gene/TcCLB.509233.239
TcCLB.510599.70	protamine_P1_putative	-1.28387	0.104481	0.0199881	0.132717	-0.808055	1	0	http://tritrypdb.org/gene/TcCLB.510599.70
TcCLB.510173.90	poly(ADP-ribose)_polymerase_putative	-1.28281	3.9e-12	8.26e-12	5.49e-11	6.57749	1	1	http://tritrypdb.org/gene/TcCLB.510173.90
TcCLB.510089.70	hypothetical_protein	-1.2821	9.75e-06	3.68e-06	2.44e-05	4.34753	1	1	http://tritrypdb.org/gene/TcCLB.510089.70
TcCLB.509583.10	chaperonin_TCP20_putative	-1.28167	3.82e-12	8.15e-12	5.41e-11	8.51943	1	1	http://tritrypdb.org/gene/TcCLB.509583.10
TcCLB.508647.130	hypothetical_protein_conserved	-1.28129	1.72e-10	2.09e-10	1.39e-09	5.87943	1	1	http://tritrypdb.org/gene/TcCLB.508647.130
TcCLB.506755.260	mitochondrial_RNA-binding_protein_2_putative	-1.28082	1.39e-07	7.74e-08	5.14e-07	7.08062	1	1	http://tritrypdb.org/gene/TcCLB.506755.260
TcCLB.506925.380	hypothetical_protein	-1.28065	1.92e-08	1.32e-08	8.78e-08	5.25682	1	1	http://tritrypdb.org/gene/TcCLB.506925.380
TcCLB.509443.20	Zn-finger_protein_putative	-1.27993	4.4e-11	6.38e-11	4.24e-10	7.19876	1	1	http://tritrypdb.org/gene/TcCLB.509443.20
TcCLB.504883.40	hypothetical_protein_conserved	-1.27953	6.19e-09	4.84e-09	3.22e-08	6.08761	1	1	http://tritrypdb.org/gene/TcCLB.504883.40
TcCLB.511731.70	hypothetical_protein_conserved	-1.27937	2.37e-07	1.25e-07	8.32e-07	4.44897	1	1	http://tritrypdb.org/gene/TcCLB.511731.70
TcCLB.511577.44	hypothetical_protein_conserved	-1.27936	1.43e-07	7.97e-08	5.29e-07	4.57651	1	1	http://tritrypdb.org/gene/TcCLB.511577.44
TcCLB.509769.63	Ran-binding_protein_putative	-1.27903	3.85e-09	3.2e-09	2.12e-08	5.03542	1	1	http://tritrypdb.org/gene/TcCLB.509769.63
TcCLB.503897.20	hypothetical_protein_conserved	-1.27888	1.58e-10	1.94e-10	1.29e-09	8.31779	1	1	http://tritrypdb.org/gene/TcCLB.503897.20
TcCLB.506495.20	helicase-like_protein_putative	-1.2787	2.96e-10	3.32e-10	2.21e-09	6.98059	1	1	http://tritrypdb.org/gene/TcCLB.506495.20
TcCLB.507467.104	hypothetical_protein_conserved	-1.27869	5.41e-09	4.31e-09	2.86e-08	4.68319	1	1	http://tritrypdb.org/gene/TcCLB.507467.104
TcCLB.506147.120	hypothetical_protein_conserved	-1.27748	5.24e-10	5.55e-10	3.68e-09	5.65261	1	1	http://tritrypdb.org/gene/TcCLB.506147.120
TcCLB.506729.9	heat_shock_70_kDa_protein_putative	-1.27613	5.78e-10	6.06e-10	4.02e-09	5.47998	1	1	http://tritrypdb.org/gene/TcCLB.506729.9
TcCLB.509765.60	retrotransposon_hot_spot_protein_(RHS_pseudogene)_putative	-1.27419	4.42e-07	2.2e-07	1.46e-06	4.12266	1	1	http://tritrypdb.org/gene/TcCLB.509765.60
TcCLB.511753.140	vacuolar_assembly_protein_vps41_putative	-1.27386	0.00268992	0.000669109	0.00444273	4.12118	1	1	http://tritrypdb.org/gene/TcCLB.511753.140
TcCLB.506945.110	casein_kinase_1_isoform_2_putative	-1.27251	6.6e-09	5.13e-09	3.4e-08	5.75283	1	1	http://tritrypdb.org/gene/TcCLB.506945.110
TcCLB.507553.20	no_Fct	-1.27212	0.126482	0.0237955	0.157997	-1.52132	1	0	http://tritrypdb.org/gene/TcCLB.507553.20
TcCLB.507101.10	amino_acid_permease_putative	-1.27062	1.1e-05	4.12e-06	2.74e-05	5.82096	1	1	http://tritrypdb.org/gene/TcCLB.507101.10
TcCLB.509825.14	40S_ribosomal_protein_SA_putative	-1.27059	3.28e-09	2.78e-09	1.84e-08	8.55231	1	1	http://tritrypdb.org/gene/TcCLB.509825.14
TcCLB.508271.30	hypothetical_protein_conserved	-1.26962	1.19e-07	6.77e-08	4.49e-07	6.30636	1	1	http://tritrypdb.org/gene/TcCLB.508271.30
TcCLB.510257.130	protein_kinase_putative	-1.26889	6.92e-10	7.07e-10	4.69e-09	6.52668	1	1	http://tritrypdb.org/gene/TcCLB.510257.130
TcCLB.507531.10	hypothetical_protein_conserved_(pseudogene)	-1.26868	4.5e-11	6.49e-11	4.31e-10	7.58424	1	1	http://tritrypdb.org/gene/TcCLB.507531.10
TcCLB.507585.20	hypothetical_protein_conserved	-1.26804	2.27e-09	2.01e-09	1.33e-08	5.86155	1	1	http://tritrypdb.org/gene/TcCLB.507585.20
TcCLB.509773.20	protein_kinase_putative	-1.26769	3.27e-05	1.12e-05	7.43e-05	3.15243	1	1	http://tritrypdb.org/gene/TcCLB.509773.20
TcCLB.504125.20	hypothetical_protein	-1.26721	1e-10	1.31e-10	8.72e-10	6.25859	1	1	http://tritrypdb.org/gene/TcCLB.504125.20
TcCLB.507831.30	hypothetical_protein_conserved	-1.26585	0.110433	0.02104	0.1397	-0.593006	1	0	http://tritrypdb.org/gene/TcCLB.507831.30
TcCLB.507079.20	dynein_heavy_chain_cytosolic_putative	-1.26553	0.000774012	0.000210655	0.0013987	4.7197	1	1	http://tritrypdb.org/gene/TcCLB.507079.20
TcCLB.511211.210	hypothetical_protein_conserved	-1.26513	3.32e-06	1.38e-06	9.15e-06	4.86481	1	1	http://tritrypdb.org/gene/TcCLB.511211.210
TcCLB.510055.140	hypothetical_protein_conserved	-1.26423	5.42e-08	3.33e-08	2.21e-07	5.51378	1	1	http://tritrypdb.org/gene/TcCLB.510055.140
TcCLB.510431.245	hypothetical_protein_conserved_(pseudogene)	-1.26361	1.42e-07	7.91e-08	5.25e-07	4.80538	1	1	http://tritrypdb.org/gene/TcCLB.510431.245
TcCLB.511625.60	hypothetical_protein_conserved	-1.26351	3.78e-07	1.91e-07	1.27e-06	4.98878	1	1	http://tritrypdb.org/gene/TcCLB.511625.60
TcCLB.506211.250	fibrillarin_putative	-1.26329	4e-11	5.86e-11	3.89e-10	7.12959	1	1	http://tritrypdb.org/gene/TcCLB.506211.250
TcCLB.508379.20	hypothetical_protein_conserved	-1.26322	3.84e-05	1.3e-05	8.61e-05	4.63505	1	1	http://tritrypdb.org/gene/TcCLB.508379.20
TcCLB.506221.120	hypothetical_protein_conserved	-1.26299	2.86e-07	1.48e-07	9.83e-07	5.2903	1	1	http://tritrypdb.org/gene/TcCLB.506221.120
TcCLB.507993.80	glycogen_synthase_kinase_3_putative;with=GeneDB:Linj18_V3.0270	-1.26203	2.27e-06	9.71e-07	6.45e-06	4.35836	1	1	http://tritrypdb.org/gene/TcCLB.507993.80
TcCLB.506811.120	hypothetical_protein_conserved	-1.26096	3.11e-10	3.47e-10	2.31e-09	6.56527	1	1	http://tritrypdb.org/gene/TcCLB.506811.120
TcCLB.407477.50	cytochrome_c_oxidase_VIII_(COX_VIII)_putative	-1.26006	1.8e-09	1.63e-09	1.08e-08	8.288	1	1	http://tritrypdb.org/gene/TcCLB.407477.50
TcCLB.504163.30	40S_ribosomal_protein_S9_putative	-1.25985	8.64e-09	6.5e-09	4.31e-08	8.02569	1	1	http://tritrypdb.org/gene/TcCLB.504163.30
TcCLB.511311.80	hypothetical_protein_conserved	-1.25927	2.1e-13	7.2e-13	4.78e-12	7.85851	1	1	http://tritrypdb.org/gene/TcCLB.511311.80
TcCLB.510877.40	hypothetical_protein_conserved	-1.2589	5.66e-08	3.47e-08	2.3e-07	7.40907	1	1	http://tritrypdb.org/gene/TcCLB.510877.40
TcCLB.503745.25	hypothetical_protein_conserved	-1.25858	2e-05	7.11e-06	4.72e-05	4.44395	1	1	http://tritrypdb.org/gene/TcCLB.503745.25
TcCLB.506753.220	hypothetical_protein_conserved	-1.25836	0.000128514	4e-05	0.00026574	3.83329	1	1	http://tritrypdb.org/gene/TcCLB.506753.220
TcCLB.510747.5	hypothetical_protein_conserved	-1.25818	4.17e-05	1.4e-05	9.29e-05	3.21692	1	1	http://tritrypdb.org/gene/TcCLB.510747.5
TcCLB.506239.20	hypothetical_protein_conserved	-1.25815	1.32e-09	1.25e-09	8.28e-09	6.66231	1	1	http://tritrypdb.org/gene/TcCLB.506239.20
TcCLB.510431.110	hypothetical_protein	-1.25726	1.19e-10	1.52e-10	1.01e-09	6.90294	1	1	http://tritrypdb.org/gene/TcCLB.510431.110
TcCLB.510105.50	fibrillarin_putative	-1.25666	9.01e-10	8.89e-10	5.9e-09	7.02142	1	1	http://tritrypdb.org/gene/TcCLB.510105.50
TcCLB.503527.40	GPI_alpha-mannosyltransferase_III	-1.25606	6.32e-12	1.24e-11	8.2e-11	6.22952	1	1	http://tritrypdb.org/gene/TcCLB.503527.40
TcCLB.510381.10	cystathionine_beta-synthase_putative	-1.25582	8.25e-06	3.17e-06	2.1e-05	6.61805	1	1	http://tritrypdb.org/gene/TcCLB.510381.10
TcCLB.506941.40	hypothetical_protein_conserved	-1.25577	7.04e-10	7.18e-10	4.77e-09	5.3908	1	1	http://tritrypdb.org/gene/TcCLB.506941.40
TcCLB.508727.50	hypothetical_protein_conserved	-1.25408	1.01e-08	7.42e-09	4.92e-08	6.02933	1	1	http://tritrypdb.org/gene/TcCLB.508727.50
TcCLB.507617.20	no_Fct	-1.25373	0.0868858	0.0168325	0.111764	0.450787	1	0	http://tritrypdb.org/gene/TcCLB.507617.20
TcCLB.509965.420	hypothetical_protein_conserved	-1.253	1.82e-09	1.65e-09	1.1e-08	6.26755	1	1	http://tritrypdb.org/gene/TcCLB.509965.420
TcCLB.511127.230	hypothetical_protein_conserved	-1.25208	1.11e-05	4.16e-06	2.76e-05	5.1394	1	1	http://tritrypdb.org/gene/TcCLB.511127.230
TcCLB.456097.30	glycerophosphoryl_diester_phosphodiesterase_putative	-1.25114	1.37e-07	7.66e-08	5.09e-07	5.20997	1	1	http://tritrypdb.org/gene/TcCLB.456097.30
TcCLB.506503.160	hypothetical_protein_conserved	-1.24935	2.51e-10	2.88e-10	1.91e-09	7.3252	1	1	http://tritrypdb.org/gene/TcCLB.506503.160
TcCLB.504147.80	mitochondrial_intermediate_peptidase_putativemetallo-peptidase_clan_MA(E)_family_M3_putative	-1.24737	1.87e-13	6.6e-13	4.38e-12	7.81766	1	1	http://tritrypdb.org/gene/TcCLB.504147.80
TcCLB.508813.60	hypothetical_protein_conserved	-1.24725	1.19e-11	2.1e-11	1.4e-10	7.48899	1	1	http://tritrypdb.org/gene/TcCLB.508813.60
TcCLB.510293.30	hypothetical_protein_conserved	-1.24684	1.75e-10	2.12e-10	1.41e-09	6.66112	1	1	http://tritrypdb.org/gene/TcCLB.510293.30
TcCLB.504881.50	ABC_transporter_putative	-1.24568	6.04e-05	1.98e-05	0.000131192	4.43552	1	1	http://tritrypdb.org/gene/TcCLB.504881.50
TcCLB.503453.100	serine_palmitoyltransferase_putative	-1.2449	6.19e-10	6.42e-10	4.26e-09	6.84854	1	1	http://tritrypdb.org/gene/TcCLB.503453.100
TcCLB.511541.30	hypothetical_protein_conserved	-1.24473	8.84e-10	8.74e-10	5.8e-09	5.08753	1	1	http://tritrypdb.org/gene/TcCLB.511541.30
TcCLB.511145.50	vacuolar_ATP_synthase_putative	-1.24264	2.81e-13	9.31e-13	6.18e-12	7.62002	1	1	http://tritrypdb.org/gene/TcCLB.511145.50
TcCLB.508647.220	hypothetical_protein_conserved	-1.24261	5.4e-13	1.58e-12	1.05e-11	7.25705	1	1	http://tritrypdb.org/gene/TcCLB.508647.220
TcCLB.506779.20	hypothetical_protein_conserved	-1.24144	7.04e-11	9.65e-11	6.4e-10	6.61497	1	1	http://tritrypdb.org/gene/TcCLB.506779.20
TcCLB.511867.50	proteasome_alpha_7_subunit_putative	-1.24093	2.52e-11	3.97e-11	2.63e-10	6.71835	1	1	http://tritrypdb.org/gene/TcCLB.511867.50
TcCLB.506163.70	hypothetical_protein_conserved	-1.24056	9.29e-10	9.11e-10	6.05e-09	7.1648	1	1	http://tritrypdb.org/gene/TcCLB.506163.70
TcCLB.509589.10	mitochondrial_DNA_polymerase_I_protein_D_putative	-1.23973	1.97e-08	1.36e-08	9e-08	5.58723	1	1	http://tritrypdb.org/gene/TcCLB.509589.10
TcCLB.504035.120	hypothetical_protein_conserved	-1.23728	1.24e-09	1.18e-09	7.85e-09	6.51716	1	1	http://tritrypdb.org/gene/TcCLB.504035.120
TcCLB.503457.4	hypothetical_protein_conserved	-1.23692	5.61e-06	2.22e-06	1.47e-05	4.38316	1	1	http://tritrypdb.org/gene/TcCLB.503457.4
TcCLB.508207.240	C-1-tetrahydrofolate_synthase_cytoplasmic_putative	-1.23668	6.15e-12	1.21e-11	8.02e-11	6.85263	1	1	http://tritrypdb.org/gene/TcCLB.508207.240
TcCLB.504035.70	cyclophilin_putative	-1.23662	8.37e-08	4.92e-08	3.27e-07	4.73284	1	1	http://tritrypdb.org/gene/TcCLB.504035.70
TcCLB.504835.10	hypothetical_protein_conserved	-1.23573	6.76e-10	6.94e-10	4.61e-09	5.35995	1	1	http://tritrypdb.org/gene/TcCLB.504835.10
TcCLB.511621.120	hypothetical_protein_conserved	-1.23519	7e-11	9.61e-11	6.38e-10	6.59918	1	1	http://tritrypdb.org/gene/TcCLB.511621.120
TcCLB.506885.360	hypothetical_protein_conserved	-1.23442	1.03e-09	9.97e-10	6.62e-09	5.82028	1	1	http://tritrypdb.org/gene/TcCLB.506885.360
TcCLB.504089.60	hypothetical_protein_conserved	-1.23437	3.81e-09	3.17e-09	2.11e-08	7.23703	1	1	http://tritrypdb.org/gene/TcCLB.504089.60
TcCLB.511145.70	centromere/microtubule_binding_protein_cbf5_putative	-1.23183	8.66e-11	1.15e-10	7.67e-10	7.43396	1	1	http://tritrypdb.org/gene/TcCLB.511145.70
TcCLB.506945.90	hypothetical_protein_conserved	-1.23067	4.88e-06	1.95e-06	1.29e-05	4.16219	1	1	http://tritrypdb.org/gene/TcCLB.506945.90
TcCLB.510309.10	hypothetical_protein_conserved	-1.23066	1.46e-06	6.54e-07	4.34e-06	5.38655	1	1	http://tritrypdb.org/gene/TcCLB.510309.10
TcCLB.507047.134	hypothetical_protein_conserved	-1.23015	1.44e-06	6.42e-07	4.26e-06	4.34029	1	1	http://tritrypdb.org/gene/TcCLB.507047.134
TcCLB.510963.80	hypothetical_protein_conserved	-1.22904	3.92e-06	1.6e-06	1.06e-05	4.16481	1	1	http://tritrypdb.org/gene/TcCLB.510963.80
TcCLB.506925.550	calpain-like_cysteine_peptidase_(pseudogene)_putativecysteine_peptidase_Clan_CA_family_C2_putative_frameshift	-1.22872	0.000191135	5.77e-05	0.000382965	5.01894	1	1	http://tritrypdb.org/gene/TcCLB.506925.550
TcCLB.507559.80	deoxyribose-phosphate_aldolase_putative	-1.2271	3.74e-12	8.02e-12	5.33e-11	7.36801	1	1	http://tritrypdb.org/gene/TcCLB.507559.80
TcCLB.504009.4	hypothetical_protein_conserved	-1.22644	1.3e-06	5.85e-07	3.88e-06	4.5782	1	1	http://tritrypdb.org/gene/TcCLB.504009.4
TcCLB.506811.180	protein_kinase_putative	-1.2264	1.02e-05	3.83e-06	2.54e-05	4.51085	1	1	http://tritrypdb.org/gene/TcCLB.506811.180
TcCLB.503579.90	hypothetical_protein_conserved	-1.22611	1.6e-08	1.12e-08	7.46e-08	5.99875	1	1	http://tritrypdb.org/gene/TcCLB.503579.90
TcCLB.511745.60	hypothetical_protein	-1.22548	7.02e-06	2.73e-06	1.81e-05	5.16737	1	1	http://tritrypdb.org/gene/TcCLB.511745.60
TcCLB.506603.43	hypothetical_protein	-1.22371	3.19e-06	1.33e-06	8.82e-06	3.93228	1	1	http://tritrypdb.org/gene/TcCLB.506603.43
TcCLB.507083.40	hypothetical_protein_conserved	-1.22369	9.96e-07	4.61e-07	3.06e-06	4.33255	1	1	http://tritrypdb.org/gene/TcCLB.507083.40
TcCLB.511575.70	hypothetical_protein_conserved_(pseudogene)	-1.22336	1.15e-09	1.1e-09	7.32e-09	5.89589	1	1	http://tritrypdb.org/gene/TcCLB.511575.70
TcCLB.511589.260	glycyl-tRNA_synthetase_putative	-1.223	0.00104638	0.00027853	0.00184937	4.74502	1	1	http://tritrypdb.org/gene/TcCLB.511589.260
TcCLB.407477.20	hypothetical_protein_conserved	-1.22295	3.74e-07	1.89e-07	1.25e-06	5.01206	1	1	http://tritrypdb.org/gene/TcCLB.407477.20
TcCLB.503527.20	hypothetical_protein_conserved	-1.22206	3.05e-10	3.41e-10	2.27e-09	6.33238	1	1	http://tritrypdb.org/gene/TcCLB.503527.20
TcCLB.506739.200	protein_phosphatase_2C_putative	-1.22179	2.46e-10	2.83e-10	1.88e-09	7.20838	1	1	http://tritrypdb.org/gene/TcCLB.506739.200
TcCLB.507011.230	hypothetical_protein_conserved_(pseudogene)	-1.2217	1.19e-08	8.61e-09	5.72e-08	6.54978	1	1	http://tritrypdb.org/gene/TcCLB.507011.230
TcCLB.509537.70	hypothetical_protein_conserved	-1.22101	2.86e-07	1.48e-07	9.85e-07	4.31576	1	1	http://tritrypdb.org/gene/TcCLB.509537.70
TcCLB.510761.18	hypothetical_protein_conserved	-1.22069	1.2e-07	6.84e-08	4.54e-07	5.66428	1	1	http://tritrypdb.org/gene/TcCLB.510761.18
TcCLB.506755.279	hypothetical_protein_conserved	-1.22058	1.14e-11	2.03e-11	1.35e-10	5.89233	1	1	http://tritrypdb.org/gene/TcCLB.506755.279
TcCLB.508277.290	hypothetical_protein_conserved	-1.21955	6.19e-13	1.77e-12	1.18e-11	7.04197	1	1	http://tritrypdb.org/gene/TcCLB.508277.290
TcCLB.506207.30	hypothetical_protein_conserved	-1.21818	2.26e-10	2.63e-10	1.75e-09	5.88819	1	1	http://tritrypdb.org/gene/TcCLB.506207.30
TcCLB.511211.100	hypothetical_protein_conserved	-1.21797	1.66e-07	9.11e-08	6.05e-07	5.25562	1	1	http://tritrypdb.org/gene/TcCLB.511211.100
TcCLB.508185.19	ubiquitin_hydrolase_putative	-1.21708	3.04e-06	1.27e-06	8.44e-06	3.99816	1	1	http://tritrypdb.org/gene/TcCLB.508185.19
TcCLB.506769.55	hypothetical_protein	-1.21666	0.0081553	0.00187996	0.0124825	1.38012	1	1	http://tritrypdb.org/gene/TcCLB.506769.55
TcCLB.510165.70	retrotransposon_hot_spot_protein_(RHS_pseudogene)_putative	-1.21648	9.79e-06	3.69e-06	2.45e-05	3.55026	1	1	http://tritrypdb.org/gene/TcCLB.510165.70
TcCLB.506885.14	ribosomal_protein_L37_putative	-1.21609	0.0105924	0.00240097	0.0159419	5.48162	1	1	http://tritrypdb.org/gene/TcCLB.506885.14
TcCLB.503885.80	hypothetical_protein_conserved	-1.2158	5.23e-10	5.54e-10	3.68e-09	6.14982	1	1	http://tritrypdb.org/gene/TcCLB.503885.80
TcCLB.503991.20	aminopeptidase_P1_putativemetallo-peptidase_Clan_MG_Family_M24_putative	-1.21464	5.61e-10	5.9e-10	3.92e-09	6.76304	1	1	http://tritrypdb.org/gene/TcCLB.503991.20
TcCLB.510173.30	hypothetical_protein_conserved	-1.21316	1.25e-06	5.67e-07	3.77e-06	5.2656	1	1	http://tritrypdb.org/gene/TcCLB.510173.30
TcCLB.408799.19	isopentenyl-diphosphate_delta-isomerase_putative	-1.2124	3.98e-07	1.99e-07	1.32e-06	5.06293	1	1	http://tritrypdb.org/gene/TcCLB.408799.19
TcCLB.506265.209	hypothetical_protein_conserved	-1.21153	1.87e-05	6.68e-06	4.43e-05	4.02534	1	1	http://tritrypdb.org/gene/TcCLB.506265.209
TcCLB.506743.100	hypothetical_protein_conserved	-1.21059	3.55e-05	1.21e-05	8.01e-05	4.66059	1	1	http://tritrypdb.org/gene/TcCLB.506743.100
TcCLB.511731.24	hypothetical_protein	-1.20972	1.11e-07	6.39e-08	4.25e-07	5.52224	1	1	http://tritrypdb.org/gene/TcCLB.511731.24
TcCLB.509767.59	protoheme_IX_farnesyltransferase_putative	-1.20951	1.71e-11	2.87e-11	1.91e-10	6.4906	1	1	http://tritrypdb.org/gene/TcCLB.509767.59
TcCLB.509445.30	solanesyl-diphosphate_synthase	-1.20933	6.33e-11	8.74e-11	5.8e-10	7.31767	1	1	http://tritrypdb.org/gene/TcCLB.509445.30
TcCLB.504033.90	mitochondrial_carrier_protein_putative	-1.20912	1.75e-10	2.12e-10	1.41e-09	7.39559	1	1	http://tritrypdb.org/gene/TcCLB.504033.90
TcCLB.506207.10	hypothetical_protein_conserved	-1.20886	4.9e-07	2.42e-07	1.61e-06	5.31127	1	1	http://tritrypdb.org/gene/TcCLB.506207.10
TcCLB.509649.50	hypothetical_protein_conserved	-1.20802	2.68e-10	3.04e-10	2.02e-09	7.36222	1	1	http://tritrypdb.org/gene/TcCLB.509649.50
TcCLB.510609.30	GTPase_putative	-1.20796	8e-08	4.71e-08	3.13e-07	5.92912	1	1	http://tritrypdb.org/gene/TcCLB.510609.30
TcCLB.510719.140	hypothetical_protein_conserved	-1.2072	7.76e-11	1.05e-10	6.98e-10	6.07312	1	1	http://tritrypdb.org/gene/TcCLB.510719.140
TcCLB.503885.90	hypothetical_protein_conserved	-1.20665	1.36e-10	1.71e-10	1.13e-09	7.46965	1	1	http://tritrypdb.org/gene/TcCLB.503885.90
TcCLB.510005.30	retrotransposon_hot_spot_protein_(RHS_pseudogene)_putative	-1.20623	2.72e-05	9.44e-06	6.27e-05	4.15599	1	1	http://tritrypdb.org/gene/TcCLB.510005.30
TcCLB.506635.60	pyroglutamyl-peptidase_I_(PGP)_putativecysteine_peptidase_Clan_CF_family_C15_putative	-1.20581	1.1e-09	1.06e-09	7.05e-09	5.74993	1	1	http://tritrypdb.org/gene/TcCLB.506635.60
TcCLB.504255.4	rhomboid-like_protein	-1.20557	3.3e-08	2.15e-08	1.42e-07	5.4503	1	1	http://tritrypdb.org/gene/TcCLB.504255.4
TcCLB.511431.90	hypothetical_protein_conserved	-1.20394	0.000591798	0.000164502	0.00109225	3.30652	1	1	http://tritrypdb.org/gene/TcCLB.511431.90
TcCLB.510349.70	hypothetical_protein_conserved	-1.20254	4.16e-07	2.08e-07	1.38e-06	4.25839	1	1	http://tritrypdb.org/gene/TcCLB.510349.70
TcCLB.503789.30	hypothetical_protein_conserved	-1.20254	1.23e-07	6.96e-08	4.62e-07	5.12184	1	1	http://tritrypdb.org/gene/TcCLB.503789.30
TcCLB.479253.9	hypothetical_protein_conserved	-1.20179	4.58e-09	3.74e-09	2.48e-08	5.57098	1	1	http://tritrypdb.org/gene/TcCLB.479253.9
TcCLB.506591.10	hypothetical_protein_conserved	-1.20108	1.37e-05	5.02e-06	3.33e-05	4.65149	1	1	http://tritrypdb.org/gene/TcCLB.506591.10
TcCLB.511329.10	calpain-like_cysteine_peptidase_putativecysteine_peptidase_Clan_CA_family_C2_putative	-1.19898	6.23e-09	4.86e-09	3.23e-08	6.13761	1	1	http://tritrypdb.org/gene/TcCLB.511329.10
TcCLB.506925.104	dynein_light_chain_putative	-1.19866	8.5e-10	8.45e-10	5.61e-09	7.00128	1	1	http://tritrypdb.org/gene/TcCLB.506925.104
TcCLB.508277.310	hypothetical_protein	-1.1981	6.8e-08	4.08e-08	2.71e-07	4.47256	1	1	http://tritrypdb.org/gene/TcCLB.508277.310
TcCLB.506737.90	trans-sialidase_putative	-1.19774	1.66e-05	5.98e-06	3.97e-05	4.10652	1	1	http://tritrypdb.org/gene/TcCLB.506737.90
TcCLB.506925.280	hypothetical_protein_conserved	-1.19761	1.38e-08	9.78e-09	6.49e-08	5.55928	1	1	http://tritrypdb.org/gene/TcCLB.506925.280
TcCLB.503821.10	DNA-directed_RNA_polymerase_subunit_putative	-1.19743	7.79e-08	4.6e-08	3.05e-07	5.26745	1	1	http://tritrypdb.org/gene/TcCLB.503821.10
TcCLB.511071.10	hypothetical_protein_conserved	-1.19705	3.94e-10	4.28e-10	2.84e-09	6.43822	1	1	http://tritrypdb.org/gene/TcCLB.511071.10
TcCLB.508307.50	hypothetical_protein_conserved	-1.19682	3.81e-08	2.44e-08	1.62e-07	5.47182	1	1	http://tritrypdb.org/gene/TcCLB.508307.50
TcCLB.506869.70	mitochondrial_structure_specific_endonuclease_I_(SSE-1)_putative	-1.1935	6.97e-10	7.12e-10	4.73e-09	5.61713	1	1	http://tritrypdb.org/gene/TcCLB.506869.70
TcCLB.507083.60	metallopeptidase_putativemetallo-peptidase_clan_MP_family_M67_putative	-1.19186	4.31e-09	3.53e-09	2.34e-08	5.97744	1	1	http://tritrypdb.org/gene/TcCLB.507083.60
TcCLB.510615.4	hypothetical_protein_conserved	-1.1916	6.46e-08	3.9e-08	2.59e-07	6.57121	1	1	http://tritrypdb.org/gene/TcCLB.510615.4
TcCLB.506351.9	5'-3'_exonuclease_XRNA_putative	-1.19108	6.86e-09	5.29e-09	3.51e-08	5.8291	1	1	http://tritrypdb.org/gene/TcCLB.506351.9
TcCLB.510963.60	hypothetical_protein_conserved	-1.19105	3.02e-07	1.56e-07	1.03e-06	5.36805	1	1	http://tritrypdb.org/gene/TcCLB.510963.60
TcCLB.506287.200	DNA_ligase_putativemitochondrial_DNA_ligase_homolog_putative	-1.19083	1.87e-11	3.09e-11	2.05e-10	6.96329	1	1	http://tritrypdb.org/gene/TcCLB.506287.200
TcCLB.503715.10	splicing_factor_TSR1_putative	-1.19044	1.17e-07	6.7e-08	4.45e-07	7.12527	1	1	http://tritrypdb.org/gene/TcCLB.503715.10
TcCLB.511309.7	hypothetical_protein	-1.18969	6.51e-06	2.55e-06	1.69e-05	4.7981	1	1	http://tritrypdb.org/gene/TcCLB.511309.7
TcCLB.503835.5	rac_serine_threonine_protein_kinase_putative	-1.18913	7.36e-05	2.38e-05	0.000157841	3.77968	1	1	http://tritrypdb.org/gene/TcCLB.503835.5
TcCLB.510325.40	acyltransferase_putative	-1.18803	1.46e-10	1.81e-10	1.2e-09	5.70876	1	1	http://tritrypdb.org/gene/TcCLB.510325.40
TcCLB.410961.10	phosphatidylinositol_kinase_related_protein_putative	-1.188	1.6e-05	5.79e-06	3.85e-05	3.81164	1	1	http://tritrypdb.org/gene/TcCLB.410961.10
TcCLB.506771.9	hypothetical_protein_conserved	-1.18782	3.8e-08	2.43e-08	1.62e-07	5.85236	1	1	http://tritrypdb.org/gene/TcCLB.506771.9
TcCLB.511071.20	hypothetical_protein_conserved	-1.18633	3.8e-07	1.91e-07	1.27e-06	5.30052	1	1	http://tritrypdb.org/gene/TcCLB.511071.20
TcCLB.507809.74	signal_peptidase_type_I_putative	-1.18617	8.7e-09	6.53e-09	4.34e-08	5.39086	1	1	http://tritrypdb.org/gene/TcCLB.507809.74
TcCLB.506739.90	ATP-dependent_RNA_helicase_putative	-1.18508	1.45e-10	1.8e-10	1.2e-09	7.39588	1	1	http://tritrypdb.org/gene/TcCLB.506739.90
TcCLB.507129.5	hypothetical_protein_conserved	-1.18452	1.32e-05	4.84e-06	3.22e-05	3.53436	1	1	http://tritrypdb.org/gene/TcCLB.507129.5
TcCLB.437121.9	hypothetical_protein_conserved	-1.18452	2.34e-10	2.71e-10	1.8e-09	7.08053	1	1	http://tritrypdb.org/gene/TcCLB.437121.9
TcCLB.511911.102	hypothetical_protein_conserved	-1.18451	2.35e-08	1.59e-08	1.05e-07	5.74577	1	1	http://tritrypdb.org/gene/TcCLB.511911.102
TcCLB.506495.24	hypothetical_protein_conserved	-1.18324	1.78e-06	7.79e-07	5.17e-06	5.13893	1	1	http://tritrypdb.org/gene/TcCLB.506495.24
TcCLB.511527.34	60S_ribosomal_protein_L2_putative	-1.18281	0.000195669	5.89e-05	0.0003913	8.34861	1	1	http://tritrypdb.org/gene/TcCLB.511527.34
TcCLB.507669.180	hypothetical_protein_conserved	-1.18247	2.48e-11	3.91e-11	2.6e-10	6.91575	1	1	http://tritrypdb.org/gene/TcCLB.507669.180
TcCLB.506763.30	mucin-associated_surface_protein_(MASP)_putative	-1.18153	0.00995403	0.00226344	0.0150287	0.0366772	1	1	http://tritrypdb.org/gene/TcCLB.506763.30
TcCLB.510535.30	hypothetical_protein	-1.18017	3.54e-10	3.89e-10	2.58e-09	5.98271	1	1	http://tritrypdb.org/gene/TcCLB.510535.30
TcCLB.504051.49	hypothetical_protein_conserved	-1.17911	6.09e-08	3.7e-08	2.46e-07	5.07041	1	1	http://tritrypdb.org/gene/TcCLB.504051.49
TcCLB.511135.40	hypothetical_protein_conserved	-1.17842	5.7e-09	4.52e-09	3e-08	5.3709	1	1	http://tritrypdb.org/gene/TcCLB.511135.40
TcCLB.507883.80	adenylate_kinase_putative	-1.17792	1.8e-06	7.9e-07	5.25e-06	4.60131	1	1	http://tritrypdb.org/gene/TcCLB.507883.80
TcCLB.504089.79	retrotransposon_hot_spot_protein_(RHS_pseudogene)_putative	-1.17791	7.23e-05	2.34e-05	0.000155153	3.2732	1	1	http://tritrypdb.org/gene/TcCLB.504089.79
TcCLB.510737.10	6-phosphogluconate_dehydrogenase_decarboxylating_putative	-1.17747	1.2e-09	1.15e-09	7.61e-09	6.11752	1	1	http://tritrypdb.org/gene/TcCLB.510737.10
TcCLB.511621.220	esterase_putative	-1.17711	5.16e-07	2.54e-07	1.68e-06	5.53314	1	1	http://tritrypdb.org/gene/TcCLB.511621.220
TcCLB.508927.20	hypothetical_protein_conserved	-1.17702	5.68e-11	7.92e-11	5.26e-10	6.13893	1	1	http://tritrypdb.org/gene/TcCLB.508927.20
TcCLB.511867.110	flap_endonuclease-1_(FEN-1)_putative	-1.1756	7.5e-09	5.72e-09	3.8e-08	6.35495	1	1	http://tritrypdb.org/gene/TcCLB.511867.110
TcCLB.507089.210	hypothetical_protein_conserved	-1.17526	1.37e-10	1.71e-10	1.14e-09	6.59399	1	1	http://tritrypdb.org/gene/TcCLB.507089.210
TcCLB.509893.29	hypothetical_protein_conserved	-1.17506	3.42e-07	1.74e-07	1.16e-06	4.96284	1	1	http://tritrypdb.org/gene/TcCLB.509893.29
TcCLB.508321.50	hypothetical_protein_conserved	-1.17496	2.12e-11	3.45e-11	2.29e-10	7.25787	1	1	http://tritrypdb.org/gene/TcCLB.508321.50
TcCLB.508949.20	hypothetical_protein_conserved	-1.17491	6.99e-06	2.72e-06	1.81e-05	4.70579	1	1	http://tritrypdb.org/gene/TcCLB.508949.20
TcCLB.506529.420	alanine_aminotransferase_putativeglutamic--alanine_transaminase_putativeglutamic--pyruvic_transaminase_putative	-1.17368	3.31e-05	1.13e-05	7.51e-05	7.12988	1	1	http://tritrypdb.org/gene/TcCLB.506529.420
TcCLB.510325.20	hypothetical_protein	-1.17338	7.77e-05	2.5e-05	0.000165877	4.61405	1	1	http://tritrypdb.org/gene/TcCLB.510325.20
TcCLB.511589.220	hypothetical_protein_conserved	-1.17307	3.11e-08	2.03e-08	1.35e-07	5.23767	1	1	http://tritrypdb.org/gene/TcCLB.511589.220
TcCLB.507521.44	hypothetical_protein_conserved	-1.17285	7.08e-06	2.75e-06	1.82e-05	4.43961	1	1	http://tritrypdb.org/gene/TcCLB.507521.44
TcCLB.509631.150	hypothetical_protein_conserved	-1.1717	4.86e-06	1.94e-06	1.29e-05	4.26244	1	1	http://tritrypdb.org/gene/TcCLB.509631.150
TcCLB.510029.70	40S_ribosomal_protein_S13_putative	-1.17125	2.87e-11	4.41e-11	2.92e-10	7.83452	1	1	http://tritrypdb.org/gene/TcCLB.510029.70
TcCLB.511071.140	2-amino-3-ketobutyrate_coenzyme_A_ligase_putative	-1.17123	5.14e-09	4.11e-09	2.73e-08	8.00285	1	1	http://tritrypdb.org/gene/TcCLB.511071.140
TcCLB.509599.100	hypothetical_protein	-1.17123	0.000135792	4.2e-05	0.000279188	4.29126	1	1	http://tritrypdb.org/gene/TcCLB.509599.100
TcCLB.509703.10	cellulosomal_scaffoldin_anchoring_protein_putative	-1.16972	2.41e-06	1.03e-06	6.81e-06	5.59887	1	1	http://tritrypdb.org/gene/TcCLB.509703.10
TcCLB.507841.34	exosome-associated_protein_4_putative	-1.16929	7.04e-08	4.21e-08	2.79e-07	5.35529	1	1	http://tritrypdb.org/gene/TcCLB.507841.34
TcCLB.508265.10	glutathione-S-transferase/glutaredoxin_putative	-1.16859	2.91e-10	3.27e-10	2.17e-09	7.02541	1	1	http://tritrypdb.org/gene/TcCLB.508265.10
TcCLB.504073.30	ribonucleoside-diphosphate_reductase_large_chain_putative	-1.16832	0.000107416	3.38e-05	0.000224509	3.94614	1	1	http://tritrypdb.org/gene/TcCLB.504073.30
TcCLB.509777.70	Calcium_ATPase_SERCA-like	-1.16585	1.07e-10	1.39e-10	9.2e-10	8.33415	1	1	http://tritrypdb.org/gene/TcCLB.509777.70
TcCLB.510879.60	hypothetical_protein_conserved	-1.16527	5.61e-08	3.44e-08	2.28e-07	4.97218	1	1	http://tritrypdb.org/gene/TcCLB.510879.60
TcCLB.506493.100	hypothetical_protein_conserved	-1.16512	2.83e-10	3.2e-10	2.13e-09	5.94105	1	1	http://tritrypdb.org/gene/TcCLB.506493.100
TcCLB.510315.14	hypothetical_protein_conserved	-1.1635	5.28e-08	3.26e-08	2.16e-07	5.08696	1	1	http://tritrypdb.org/gene/TcCLB.510315.14
TcCLB.509885.10	vacuolar_ATP_synthase_putative	-1.16246	4.57e-11	6.56e-11	4.36e-10	6.40727	1	1	http://tritrypdb.org/gene/TcCLB.509885.10
TcCLB.510123.10	hypothetical_protein_conserved	-1.1619	6.97e-09	5.36e-09	3.56e-08	6.45639	1	1	http://tritrypdb.org/gene/TcCLB.510123.10
TcCLB.503697.70	hypothetical_protein_conserved	-1.16177	3.32e-07	1.7e-07	1.13e-06	6.02329	1	1	http://tritrypdb.org/gene/TcCLB.503697.70
TcCLB.504159.80	histone_deacetylase_putative	-1.16132	1.27e-09	1.2e-09	7.98e-09	6.34536	1	1	http://tritrypdb.org/gene/TcCLB.504159.80
TcCLB.507507.49	hypothetical_protein_conserved	-1.16077	3.69e-05	1.25e-05	8.29e-05	3.9772	1	1	http://tritrypdb.org/gene/TcCLB.507507.49
TcCLB.507709.120	hypothetical_protein_conserved	-1.15978	9.01e-08	5.25e-08	3.48e-07	8.39151	1	1	http://tritrypdb.org/gene/TcCLB.507709.120
TcCLB.508099.40	hypothetical_protein	-1.15859	0.0771036	0.0150839	0.100153	-0.37663	1	0	http://tritrypdb.org/gene/TcCLB.508099.40
TcCLB.507093.190	hypothetical_protein_conserved	-1.15799	2.49e-07	1.31e-07	8.7e-07	4.70963	1	1	http://tritrypdb.org/gene/TcCLB.507093.190
TcCLB.506341.10	N-acetylglucosamine-6-phosphate_deacetylase-like_protein_putative	-1.15742	3.99e-11	5.85e-11	3.88e-10	7.08126	1	1	http://tritrypdb.org/gene/TcCLB.506341.10
TcCLB.506529.110	hypothetical_protein_conserved	-1.15734	9.94e-09	7.33e-09	4.87e-08	5.15604	1	1	http://tritrypdb.org/gene/TcCLB.506529.110
TcCLB.506737.140	syntaxin_binding_protein_1_putative	-1.1561	2.61e-09	2.28e-09	1.51e-08	6.74825	1	1	http://tritrypdb.org/gene/TcCLB.506737.140
TcCLB.507667.11	hypothetical_protein_conserved	-1.15432	1.55e-08	1.09e-08	7.25e-08	5.5522	1	1	http://tritrypdb.org/gene/TcCLB.507667.11
TcCLB.509767.70	vacuolar_proton_translocating_ATPase_subunit_A_putative	-1.15399	1.14e-11	2.04e-11	1.35e-10	7.8141	1	1	http://tritrypdb.org/gene/TcCLB.509767.70
TcCLB.503579.119	hypothetical_protein_conserved	-1.15397	6.26e-08	3.79e-08	2.52e-07	4.91398	1	1	http://tritrypdb.org/gene/TcCLB.503579.119
TcCLB.510565.147	no_Fct	-1.15362	0.0368916	0.00765224	0.0508091	-0.323663	1	0	http://tritrypdb.org/gene/TcCLB.510565.147
TcCLB.510609.65	U6_snRNA-associated_Sm-like_protein_LSm3p	-1.15346	1.74e-06	7.65e-07	5.08e-06	4.14857	1	1	http://tritrypdb.org/gene/TcCLB.510609.65
TcCLB.508277.280	hypothetical_protein	-1.15301	1.82e-07	9.88e-08	6.56e-07	5.13222	1	1	http://tritrypdb.org/gene/TcCLB.508277.280
TcCLB.511071.120	hypothetical_protein_conserved	-1.152	8.28e-12	1.57e-11	1.04e-10	6.89774	1	1	http://tritrypdb.org/gene/TcCLB.511071.120
TcCLB.506181.80	hypothetical_protein_conserved	-1.15199	3.24e-07	1.66e-07	1.1e-06	4.99986	1	1	http://tritrypdb.org/gene/TcCLB.506181.80
TcCLB.506771.18	hypothetical_protein_conserved	-1.15134	3.83e-10	4.19e-10	2.78e-09	6.16929	1	1	http://tritrypdb.org/gene/TcCLB.506771.18
TcCLB.506925.490	hypothetical_protein_conserved	-1.14903	1.38e-10	1.72e-10	1.14e-09	6.50129	1	1	http://tritrypdb.org/gene/TcCLB.506925.490
TcCLB.504449.40	hypothetical_protein	-1.14887	8.9e-09	6.65e-09	4.42e-08	5.01751	1	1	http://tritrypdb.org/gene/TcCLB.504449.40
TcCLB.509171.70	hypothetical_protein_conserved	-1.14831	1.01e-08	7.4e-09	4.92e-08	6.17457	1	1	http://tritrypdb.org/gene/TcCLB.509171.70
TcCLB.503981.40	DnaJ_chaperone_protein_putative	-1.14788	1.32e-12	3.33e-12	2.21e-11	7.99959	1	1	http://tritrypdb.org/gene/TcCLB.503981.40
TcCLB.503487.10	mitochondrial_DNA-directed_RNA_polymerase_putative	-1.14617	9.82e-09	7.25e-09	4.82e-08	5.91858	1	1	http://tritrypdb.org/gene/TcCLB.503487.10
TcCLB.506799.10	fatty_acid_transporter_protein-like_putative	-1.14613	1.44e-09	1.34e-09	8.91e-09	7.25505	1	1	http://tritrypdb.org/gene/TcCLB.506799.10
TcCLB.509267.6	trans-sialidase_(pseudogene)_putative	-1.1448	0.000176786	5.37e-05	0.000356468	4.39805	1	1	http://tritrypdb.org/gene/TcCLB.509267.6
TcCLB.511525.11	hypothetical_protein_conserved	-1.14435	7.13e-07	3.4e-07	2.26e-06	4.268	1	1	http://tritrypdb.org/gene/TcCLB.511525.11
TcCLB.510341.10	hypothetical_protein	-1.14322	3.57e-05	1.21e-05	8.05e-05	4.08244	1	1	http://tritrypdb.org/gene/TcCLB.510341.10
TcCLB.511129.60	hypothetical_protein_conserved	-1.14192	5.76e-07	2.8e-07	1.86e-06	5.75014	1	1	http://tritrypdb.org/gene/TcCLB.511129.60
TcCLB.507739.40	uracil_phosphoribosyltransferase_putative	-1.14144	8.6e-11	1.15e-10	7.63e-10	6.47511	1	1	http://tritrypdb.org/gene/TcCLB.507739.40
TcCLB.509979.95	60S_ribosomal_protein_L35_putative	-1.14105	4.26e-06	1.72e-06	1.14e-05	7.87471	1	1	http://tritrypdb.org/gene/TcCLB.509979.95
TcCLB.504147.20	60S_ribosomal_protein_L18_putative	-1.14101	2.14e-10	2.51e-10	1.67e-09	8.23485	1	1	http://tritrypdb.org/gene/TcCLB.504147.20
TcCLB.508557.29	hypothetical_protein_conserved	-1.13995	5.8e-11	8.07e-11	5.36e-10	6.33764	1	1	http://tritrypdb.org/gene/TcCLB.508557.29
TcCLB.508277.390	hypothetical_protein_conserved	-1.13974	1.74e-07	9.46e-08	6.28e-07	5.80088	1	1	http://tritrypdb.org/gene/TcCLB.508277.390
TcCLB.507389.60	chaperone_DNAJ_protein_putative	-1.13941	3.62e-09	3.03e-09	2.01e-08	5.42495	1	1	http://tritrypdb.org/gene/TcCLB.507389.60
TcCLB.507669.90	hypothetical_protein_conserved	-1.13843	6.28e-10	6.49e-10	4.31e-09	6.405	1	1	http://tritrypdb.org/gene/TcCLB.507669.90
TcCLB.506413.30	40S_ribosomal_protein_S33_putative	-1.13819	2.36e-06	1.01e-06	6.68e-06	7.65765	1	1	http://tritrypdb.org/gene/TcCLB.506413.30
TcCLB.504153.340	hypothetical_protein_conserved	-1.13785	3.9e-10	4.25e-10	2.82e-09	6.49377	1	1	http://tritrypdb.org/gene/TcCLB.504153.340
TcCLB.504119.29	deoxyhypusine_synthase_putative;with=GeneDB:Linj34_V3.0350	-1.13745	2.02e-10	2.4e-10	1.59e-09	7.04578	1	1	http://tritrypdb.org/gene/TcCLB.504119.29
TcCLB.503391.10	ATP-dependent_DEAD/H_DNA_helicase_recQ_putative	-1.13678	1.45e-05	5.27e-06	3.5e-05	5.2591	1	1	http://tritrypdb.org/gene/TcCLB.503391.10
TcCLB.508951.40	acyl-CoA_dehydrogenase_putative	-1.13537	1.02e-07	5.9e-08	3.92e-07	5.91392	1	1	http://tritrypdb.org/gene/TcCLB.508951.40
TcCLB.507603.250	hypothetical_protein_conserved	-1.1349	7.94e-10	7.95e-10	5.28e-09	6.55623	1	1	http://tritrypdb.org/gene/TcCLB.507603.250
TcCLB.507039.20	GDP-mannose_46_dehydratase_(pseudogene)_putative	-1.13479	9.14e-06	3.47e-06	2.3e-05	4.58613	1	1	http://tritrypdb.org/gene/TcCLB.507039.20
TcCLB.510341.4	Monooxygenase_putative	-1.13479	1.1e-05	4.09e-06	2.72e-05	4.48774	1	1	http://tritrypdb.org/gene/TcCLB.510341.4
TcCLB.507617.190	no_Fct	-1.13475	6.43e-07	3.1e-07	2.06e-06	5.02522	1	1	http://tritrypdb.org/gene/TcCLB.507617.190
TcCLB.506405.110	ribosomal_protein_L13_putative	-1.13399	1.66e-07	9.09e-08	6.04e-07	5.08612	1	1	http://tritrypdb.org/gene/TcCLB.506405.110
TcCLB.507711.190	hypothetical_protein_conserved	-1.1334	7.95e-12	1.51e-11	1e-10	7.33115	1	1	http://tritrypdb.org/gene/TcCLB.507711.190
TcCLB.509965.220	hypothetical_protein_conserved	-1.13228	7.55e-10	7.62e-10	5.06e-09	6.4945	1	1	http://tritrypdb.org/gene/TcCLB.509965.220
TcCLB.506979.20	hypothetical_protein_conserved	-1.13203	4e-06	1.63e-06	1.08e-05	5.16894	1	1	http://tritrypdb.org/gene/TcCLB.506979.20
TcCLB.506885.170	hypothetical_protein_conserved	-1.13149	1.96e-07	1.06e-07	7.01e-07	5.59681	1	1	http://tritrypdb.org/gene/TcCLB.506885.170
TcCLB.503967.10	hypothetical_protein_conserved	-1.1313	2.57e-11	4.04e-11	2.68e-10	6.41965	1	1	http://tritrypdb.org/gene/TcCLB.503967.10
TcCLB.506179.50	hypothetical_protein_conserved	-1.13067	1.93e-07	1.04e-07	6.92e-07	5.97252	1	1	http://tritrypdb.org/gene/TcCLB.506179.50
TcCLB.508181.140	inorganic_pyrophosphatase_putative	-1.13013	2.22e-09	1.97e-09	1.31e-08	5.85589	1	1	http://tritrypdb.org/gene/TcCLB.508181.140
TcCLB.504423.10	hypothetical_protein_conserved	-1.12978	0.00014216	4.39e-05	0.000291252	4.20822	1	1	http://tritrypdb.org/gene/TcCLB.504423.10
TcCLB.510101.140	pyruvate_phosphate_dikinase_putative	-1.12974	2.54e-07	1.33e-07	8.83e-07	10.3386	1	1	http://tritrypdb.org/gene/TcCLB.510101.140
TcCLB.510525.100	histone_H2A_putative	-1.12943	0.000325253	9.45e-05	0.000627534	6.36412	1	1	http://tritrypdb.org/gene/TcCLB.510525.100
TcCLB.509231.23	hypothetical_protein_conserved	-1.12877	7.61e-09	5.8e-09	3.85e-08	6.41408	1	1	http://tritrypdb.org/gene/TcCLB.509231.23
TcCLB.511685.50	hypothetical_protein_conserved	-1.12874	1.63e-07	8.98e-08	5.96e-07	4.97508	1	1	http://tritrypdb.org/gene/TcCLB.511685.50
TcCLB.511577.10	hypothetical_protein_conserved	-1.12864	0.000226477	6.75e-05	0.000448029	4.49665	1	1	http://tritrypdb.org/gene/TcCLB.511577.10
TcCLB.510173.100	hypothetical_protein_conserved	-1.12835	5.82e-08	3.55e-08	2.36e-07	5.93255	1	1	http://tritrypdb.org/gene/TcCLB.510173.100
TcCLB.506945.300	V-type_ATPase_C_subunit_putative	-1.12828	1.22e-07	6.93e-08	4.6e-07	6.07066	1	1	http://tritrypdb.org/gene/TcCLB.506945.300
TcCLB.505945.5	mitogen-activated_protein_kinase_3_putative	-1.12817	4.85e-05	1.61e-05	0.000107156	4.43225	1	1	http://tritrypdb.org/gene/TcCLB.505945.5
TcCLB.510609.40	ATPase_alpha_subunit_(pseudogene)_putative	-1.12768	6.83e-09	5.28e-09	3.5e-08	10.6421	1	1	http://tritrypdb.org/gene/TcCLB.510609.40
TcCLB.506401.210	hypothetical_protein_conserved	-1.12711	1.81e-08	1.26e-08	8.34e-08	6.22021	1	1	http://tritrypdb.org/gene/TcCLB.506401.210
TcCLB.509497.30	agmatinase_putative	-1.1251	1.16e-08	8.39e-09	5.57e-08	5.67101	1	1	http://tritrypdb.org/gene/TcCLB.509497.30
TcCLB.504143.30	kinesin_protein_(pseudogene)_putative	-1.12425	1.6e-09	1.47e-09	9.75e-09	5.61879	1	1	http://tritrypdb.org/gene/TcCLB.504143.30
TcCLB.511573.20	hypothetical_protein	-1.1241	7.31e-11	9.98e-11	6.63e-10	7.20831	1	1	http://tritrypdb.org/gene/TcCLB.511573.20
TcCLB.511529.259	hypothetical_protein_conserved	-1.12245	2.26e-06	9.66e-07	6.42e-06	4.26791	1	1	http://tritrypdb.org/gene/TcCLB.511529.259
TcCLB.509967.140	hypothetical_protein_conserved	-1.12235	1.79e-05	6.43e-06	4.27e-05	5.17833	1	1	http://tritrypdb.org/gene/TcCLB.509967.140
TcCLB.503821.5	hypothetical_protein_conserved	-1.12215	2.82e-05	9.76e-06	6.48e-05	4.47512	1	1	http://tritrypdb.org/gene/TcCLB.503821.5
TcCLB.508515.90	hypothetical_protein_conserved	-1.12209	1.52e-07	8.42e-08	5.59e-07	4.777	1	1	http://tritrypdb.org/gene/TcCLB.508515.90
TcCLB.508647.280	malic_enzyme_putative	-1.12119	5.54e-08	3.4e-08	2.26e-07	9.36512	1	1	http://tritrypdb.org/gene/TcCLB.508647.280
TcCLB.504101.10	hypothetical_protein	-1.12053	2.23e-05	7.85e-06	5.21e-05	3.82968	1	1	http://tritrypdb.org/gene/TcCLB.504101.10
TcCLB.509775.9	protein_kinase_putative	-1.12014	6.76e-05	2.2e-05	0.000145867	4.50754	1	1	http://tritrypdb.org/gene/TcCLB.509775.9
TcCLB.506213.120	ATP-dependent_RNA_helicase_putative	-1.11999	1.93e-06	8.41e-07	5.58e-06	5.92741	1	1	http://tritrypdb.org/gene/TcCLB.506213.120
TcCLB.510431.280	RNA_editing_complex_protein_MP46_putative	-1.11939	7.22e-08	4.3e-08	2.86e-07	6.13276	1	1	http://tritrypdb.org/gene/TcCLB.510431.280
TcCLB.511309.60	hypothetical_protein_conserved	-1.11913	7.89e-05	2.54e-05	0.000168487	3.87838	1	1	http://tritrypdb.org/gene/TcCLB.511309.60
TcCLB.504427.70	3-oxo-5-alpha-steroid_4-dehydrogenase_putative	-1.11872	7.87e-08	4.64e-08	3.08e-07	5.57795	1	1	http://tritrypdb.org/gene/TcCLB.504427.70
TcCLB.506567.60	ABC_transporter_putative	-1.11822	3.05e-09	2.62e-09	1.74e-08	5.88177	1	1	http://tritrypdb.org/gene/TcCLB.506567.60
TcCLB.511621.259	hypothetical_protein_conserved	-1.11714	0.00299443	0.000738442	0.00490308	5.20231	1	1	http://tritrypdb.org/gene/TcCLB.511621.259
TcCLB.511583.40	tricarboxylate_carrier_putative	-1.11667	4.89e-08	3.04e-08	2.02e-07	6.38694	1	1	http://tritrypdb.org/gene/TcCLB.511583.40
TcCLB.510053.79	FG-GAP_repeat_protein_putative	-1.11538	8.96e-08	5.23e-08	3.47e-07	5.19472	1	1	http://tritrypdb.org/gene/TcCLB.510053.79
TcCLB.511211.170	heat_shock_protein_70_(hsp70)_putative	-1.11535	1.14e-05	4.25e-06	2.83e-05	11.9739	1	1	http://tritrypdb.org/gene/TcCLB.511211.170
TcCLB.505009.4	hypothetical_protein_conserved	-1.11495	1.78e-05	6.39e-06	4.24e-05	4.32994	1	1	http://tritrypdb.org/gene/TcCLB.505009.4
TcCLB.510747.114	hypothetical_protein_conserved	-1.11438	1.86e-05	6.66e-06	4.42e-05	4.34721	1	1	http://tritrypdb.org/gene/TcCLB.510747.114
TcCLB.507979.40	hypothetical_protein_conserved	-1.11256	0.0572065	0.0114588	0.0760839	2.40387	1	0	http://tritrypdb.org/gene/TcCLB.507979.40
TcCLB.509895.70	hypothetical_protein_conserved	-1.11209	4.05e-05	1.36e-05	9.05e-05	4.1685	1	1	http://tritrypdb.org/gene/TcCLB.509895.70
TcCLB.510719.40	hypothetical_protein_conserved	-1.11155	4.48e-08	2.83e-08	1.88e-07	5.43172	1	1	http://tritrypdb.org/gene/TcCLB.510719.40
TcCLB.506249.40	hypothetical_protein_conserved	-1.11148	1.15e-08	8.31e-09	5.52e-08	6.22587	1	1	http://tritrypdb.org/gene/TcCLB.506249.40
TcCLB.506289.40	hypothetical_protein_conserved	-1.11116	1.1e-07	6.31e-08	4.19e-07	6.00514	1	1	http://tritrypdb.org/gene/TcCLB.506289.40
TcCLB.506405.50	serine-palmitoyl-CoA_transferase_putative	-1.10983	3.21e-10	3.57e-10	2.37e-09	6.89424	1	1	http://tritrypdb.org/gene/TcCLB.506405.50
TcCLB.506529.60	hypothetical_protein_conserved	-1.10971	1.54e-06	6.85e-07	4.55e-06	4.99027	1	1	http://tritrypdb.org/gene/TcCLB.506529.60
TcCLB.510719.74	hypothetical_protein_conserved	-1.10825	1.71e-09	1.55e-09	1.03e-08	5.74051	1	1	http://tritrypdb.org/gene/TcCLB.510719.74
TcCLB.511803.30	hypothetical_protein_conserved	-1.10806	4.53e-08	2.85e-08	1.89e-07	4.91151	1	1	http://tritrypdb.org/gene/TcCLB.511803.30
TcCLB.506147.100	hypothetical_protein_conserved	-1.10778	1.83e-09	1.65e-09	1.1e-08	6.36314	1	1	http://tritrypdb.org/gene/TcCLB.506147.100
TcCLB.510719.70	hypothetical_protein_conserved	-1.10774	2.56e-10	2.93e-10	1.95e-09	6.15006	1	1	http://tritrypdb.org/gene/TcCLB.510719.70
TcCLB.504137.140	hypothetical_protein_conserved	-1.10695	1.83e-08	1.26e-08	8.39e-08	6.22767	1	1	http://tritrypdb.org/gene/TcCLB.504137.140
TcCLB.507927.60	hypothetical_protein_conserved	-1.10678	9.5e-11	1.25e-10	8.31e-10	7.73382	1	1	http://tritrypdb.org/gene/TcCLB.507927.60
TcCLB.504835.20	3-methylcrotonyl-CoA_carboxylase_putative	-1.10529	1.19e-11	2.11e-11	1.4e-10	6.54966	1	1	http://tritrypdb.org/gene/TcCLB.504835.20
TcCLB.507129.30	C-14_sterol_reductase_putative	-1.10527	5.77e-12	1.15e-11	7.61e-11	7.71366	1	1	http://tritrypdb.org/gene/TcCLB.507129.30
TcCLB.505977.26	60S_acidic_ribosomal_protein_P2_putative	-1.10525	2.15e-07	1.15e-07	7.62e-07	7.56349	1	1	http://tritrypdb.org/gene/TcCLB.505977.26
TcCLB.509965.200	hypothetical_protein_conserved	-1.10503	6.83e-09	5.28e-09	3.5e-08	5.49324	1	1	http://tritrypdb.org/gene/TcCLB.509965.200
TcCLB.510565.125	hypothetical_protein_conserved	-1.10452	0.000140103	4.33e-05	0.000287599	4.69821	1	1	http://tritrypdb.org/gene/TcCLB.510565.125
TcCLB.510593.40	hypothetical_protein_conserved	-1.10423	1.13e-07	6.47e-08	4.3e-07	5.79336	1	1	http://tritrypdb.org/gene/TcCLB.510593.40
TcCLB.511621.50	RNA-binding_protein_putative	-1.1042	2.49e-07	1.31e-07	8.68e-07	8.33214	1	1	http://tritrypdb.org/gene/TcCLB.511621.50
TcCLB.508781.20	ATP_synthase_putative	-1.10399	3.13e-12	6.91e-12	4.59e-11	6.90443	1	1	http://tritrypdb.org/gene/TcCLB.508781.20
TcCLB.506363.150	soluble_N-ethylmaleimide_sensitive_factor_(NSF)_attachment_protein_putative	-1.10388	3.03e-07	1.56e-07	1.04e-06	5.61941	1	1	http://tritrypdb.org/gene/TcCLB.506363.150
TcCLB.504119.4	DNA-directed_RNA_polymerase_III_largest_subunit_putative	-1.10362	3.13e-07	1.61e-07	1.07e-06	4.78575	1	1	http://tritrypdb.org/gene/TcCLB.504119.4
TcCLB.507009.20	hypothetical_protein_conserved	-1.10289	2.54e-08	1.7e-08	1.13e-07	5.04763	1	1	http://tritrypdb.org/gene/TcCLB.507009.20
TcCLB.506147.140	hypothetical_protein_conserved	-1.10263	5.08e-09	4.07e-09	2.7e-08	6.46816	1	1	http://tritrypdb.org/gene/TcCLB.506147.140
TcCLB.510073.40	hypothetical_protein_conserved	-1.10146	0.000283012	8.3e-05	0.000551425	4.68113	1	1	http://tritrypdb.org/gene/TcCLB.510073.40
TcCLB.510565.170	hypothetical_protein_conserved	-1.10073	8.79e-06	3.35e-06	2.23e-05	4.014	1	1	http://tritrypdb.org/gene/TcCLB.510565.170
TcCLB.509081.10	elongation_factor_1-gamma_(EF-1-gamma)_putative	-1.10001	0.000176057	5.35e-05	0.000355134	5.00015	1	1	http://tritrypdb.org/gene/TcCLB.509081.10
TcCLB.506501.341	surface_protease_GP63_(pseudogene)_putative	-1.09813	0.00854234	0.00195997	0.0130138	1.05549	1	1	http://tritrypdb.org/gene/TcCLB.506501.341
TcCLB.503841.80	NADH-dependent_fumarate_reductase_putative	-1.09693	0.0002053	6.16e-05	0.000408997	4.19031	1	1	http://tritrypdb.org/gene/TcCLB.503841.80
TcCLB.504057.45	hypothetical_protein_conserved	-1.0966	7.29e-10	7.39e-10	4.91e-09	5.75343	1	1	http://tritrypdb.org/gene/TcCLB.504057.45
TcCLB.511067.10	tubulin_folding_cofactor_D_putative	-1.09533	9.92e-09	7.33e-09	4.86e-08	7.92292	1	1	http://tritrypdb.org/gene/TcCLB.511067.10
TcCLB.507143.90	hypothetical_protein	-1.09519	0.109572	0.020891	0.138712	0.102524	1	0	http://tritrypdb.org/gene/TcCLB.507143.90
TcCLB.506529.314	hypothetical_protein_conserved	-1.09512	9.14e-08	5.31e-08	3.53e-07	4.67981	1	1	http://tritrypdb.org/gene/TcCLB.506529.314
TcCLB.509829.9	retrotransposon_hot_spot_(RHS)_protein_putative	-1.09471	0.000360278	0.000103941	0.000690147	5.04916	1	1	http://tritrypdb.org/gene/TcCLB.509829.9
TcCLB.505009.40	hypothetical_protein_conserved	-1.09441	5.35e-11	7.56e-11	5.02e-10	6.0725	1	1	http://tritrypdb.org/gene/TcCLB.505009.40
TcCLB.503893.10	copper-transporting_ATPase-like_protein_putative	-1.09428	0.0180104	0.00392924	0.0260893	2.57293	1	1	http://tritrypdb.org/gene/TcCLB.503893.10
TcCLB.506211.130	hypothetical_protein_conserved	-1.09387	6.97e-09	5.36e-09	3.56e-08	7.16958	1	1	http://tritrypdb.org/gene/TcCLB.506211.130
TcCLB.511577.90	pseudouridylate_synthase-like_protein_putative	-1.09317	1.25e-08	8.99e-09	5.97e-08	5.77298	1	1	http://tritrypdb.org/gene/TcCLB.511577.90
TcCLB.503753.29	NADPH--cytochrome_p450_reductase_putative	-1.09302	6.12e-09	4.79e-09	3.18e-08	6.24726	1	1	http://tritrypdb.org/gene/TcCLB.503753.29
TcCLB.508185.10	enoyl-CoA_hydratase_mitochondrial_precursor_putative	-1.09228	3.59e-09	3.01e-09	2e-08	6.53982	1	1	http://tritrypdb.org/gene/TcCLB.508185.10
TcCLB.506893.25	U6_snRNA-associated_Sm-like_protein_LSm6p	-1.09173	1.2e-06	5.46e-07	3.63e-06	4.37715	1	1	http://tritrypdb.org/gene/TcCLB.506893.25
TcCLB.510345.30	hypothetical_protein	-1.09137	9.73e-05	3.09e-05	0.000205065	4.21592	1	1	http://tritrypdb.org/gene/TcCLB.510345.30
TcCLB.506179.5	ferric_reductase_putative	-1.09126	0.0064887	0.00152134	0.0101014	3.17994	1	1	http://tritrypdb.org/gene/TcCLB.506179.5
TcCLB.506949.10	DNA-directed_rna_polymerase_I_largest_subunit_putative	-1.09053	2.42e-05	8.47e-06	5.62e-05	4.39985	1	1	http://tritrypdb.org/gene/TcCLB.506949.10
TcCLB.507883.100	malate_dehydrogenase_putative	-1.09012	2.67e-08	1.78e-08	1.18e-07	5.72583	1	1	http://tritrypdb.org/gene/TcCLB.507883.100
TcCLB.506729.30	hypothetical_protein_conserved	-1.08959	3.86e-09	3.21e-09	2.13e-08	5.52171	1	1	http://tritrypdb.org/gene/TcCLB.506729.30
TcCLB.506529.669	hypothetical_protein_conserved	-1.08895	2.89e-05	1e-05	6.64e-05	4.68933	1	1	http://tritrypdb.org/gene/TcCLB.506529.669
TcCLB.510347.29	hypothetical_protein_conserved	-1.08863	6.22e-05	2.03e-05	0.000135098	4.97019	1	1	http://tritrypdb.org/gene/TcCLB.510347.29
TcCLB.503425.20	glutaredoxin-like_protein_putative	-1.08684	5.88e-06	2.32e-06	1.54e-05	5.56669	1	1	http://tritrypdb.org/gene/TcCLB.503425.20
TcCLB.507993.60	hypothetical_protein_conserved	-1.08675	1.55e-07	8.56e-08	5.68e-07	5.46942	1	1	http://tritrypdb.org/gene/TcCLB.507993.60
TcCLB.509537.40	hypothetical_protein_conserved	-1.08632	2.6e-08	1.73e-08	1.15e-07	6.49881	1	1	http://tritrypdb.org/gene/TcCLB.509537.40
TcCLB.426397.9	kinesin_putative	-1.08627	3.25e-09	2.75e-09	1.83e-08	6.29369	1	1	http://tritrypdb.org/gene/TcCLB.426397.9
TcCLB.504029.80	serine/threonine_protein_phosphatase_putative	-1.08491	9.68e-11	1.27e-10	8.46e-10	6.55	1	1	http://tritrypdb.org/gene/TcCLB.504029.80
TcCLB.506289.60	hypothetical_protein_conserved	-1.08404	6.75e-10	6.94e-10	4.61e-09	6.72651	1	1	http://tritrypdb.org/gene/TcCLB.506289.60
TcCLB.508227.40	mucin-associated_surface_protein_(MASP)_putative	-1.08383	0.0175992	0.00384913	0.0255573	2.28834	1	1	http://tritrypdb.org/gene/TcCLB.508227.40
TcCLB.506649.50	cytochrome_c_oxidase_assembly_factor_putative	-1.08351	8.88e-10	8.78e-10	5.83e-09	6.5559	1	1	http://tritrypdb.org/gene/TcCLB.506649.50
TcCLB.510769.60	hypothetical_protein_conserved_(pseudogene)	-1.08311	7.06e-10	7.19e-10	4.77e-09	6.68404	1	1	http://tritrypdb.org/gene/TcCLB.510769.60
TcCLB.510515.110	hypothetical_protein_conserved	-1.08287	1.6e-10	1.96e-10	1.3e-09	6.39964	1	1	http://tritrypdb.org/gene/TcCLB.510515.110
TcCLB.509625.30	hypothetical_protein_conserved	-1.08262	2.65e-06	1.12e-06	7.44e-06	5.84094	1	1	http://tritrypdb.org/gene/TcCLB.509625.30
TcCLB.511621.200	ribosomal_protein_L11_putative	-1.0826	0.000460316	0.000130411	0.000865898	4.66301	1	1	http://tritrypdb.org/gene/TcCLB.511621.200
TcCLB.511803.60	hypothetical_protein_conserved	-1.08235	1.6e-08	1.12e-08	7.47e-08	5.25942	1	1	http://tritrypdb.org/gene/TcCLB.511803.60
TcCLB.508569.100	hypothetical_protein_conserved	-1.0823	1.86e-07	1.01e-07	6.68e-07	5.17034	1	1	http://tritrypdb.org/gene/TcCLB.508569.100
TcCLB.509885.64	hypothetical_protein_conserved	-1.08208	3.67e-05	1.24e-05	8.25e-05	4.43667	1	1	http://tritrypdb.org/gene/TcCLB.509885.64
TcCLB.506743.30	50S_ribosomal_protein_L17_putative	-1.08079	2.72e-07	1.42e-07	9.41e-07	5.40488	1	1	http://tritrypdb.org/gene/TcCLB.506743.30
TcCLB.508839.40	hypothetical_protein_conserved	-1.08047	3.91e-08	2.5e-08	1.66e-07	6.30331	1	1	http://tritrypdb.org/gene/TcCLB.508839.40
TcCLB.506739.50	heat_shock_protein_HslVU_ATPase_subunit_HslU_putative	-1.08046	1.31e-10	1.65e-10	1.1e-09	7.23373	1	1	http://tritrypdb.org/gene/TcCLB.506739.50
TcCLB.510861.30	hypothetical_protein_conserved	-1.08041	3.88e-08	2.48e-08	1.65e-07	5.77442	1	1	http://tritrypdb.org/gene/TcCLB.510861.30
TcCLB.509455.114	hypothetical_protein_conserved	-1.08022	2.04e-07	1.09e-07	7.25e-07	5.6558	1	1	http://tritrypdb.org/gene/TcCLB.509455.114
TcCLB.507805.20	hypothetical_protein	-1.079	2.83e-06	1.19e-06	7.89e-06	5.32638	1	1	http://tritrypdb.org/gene/TcCLB.507805.20
TcCLB.506767.220	mucin_TcMUCII_putative	-1.07844	0.0804422	0.0156747	0.104077	-0.173804	1	0	http://tritrypdb.org/gene/TcCLB.506767.220
TcCLB.508241.10	glycerol-3-phosphate_dehydrogenase_putative	-1.07797	9.73e-08	5.64e-08	3.74e-07	5.92632	1	1	http://tritrypdb.org/gene/TcCLB.508241.10
TcCLB.506637.20	hypothetical_protein_conserved	-1.07793	1.28e-05	4.72e-06	3.14e-05	5.93908	1	1	http://tritrypdb.org/gene/TcCLB.506637.20
TcCLB.509955.10	ubiquitin_hydrolase_putativecysteine_peptidase_Clan_CA_family_C19_putative	-1.07782	5.2e-09	4.15e-09	2.76e-08	5.44682	1	1	http://tritrypdb.org/gene/TcCLB.509955.10
TcCLB.506779.200	glycerol-3-phosphate_dehydrogenase_(pseudogene)_putative	-1.07772	3.74e-08	2.4e-08	1.59e-07	6.28028	1	1	http://tritrypdb.org/gene/TcCLB.506779.200
TcCLB.511353.34	hypothetical_protein_conserved	-1.07759	2.76e-10	3.12e-10	2.07e-09	6.40702	1	1	http://tritrypdb.org/gene/TcCLB.511353.34
TcCLB.507467.20	hypothetical_protein_conserved	-1.07757	0.000107052	3.37e-05	0.000223793	5.95673	1	1	http://tritrypdb.org/gene/TcCLB.507467.20
TcCLB.510089.100	hypothetical_protein	-1.07662	7.74e-10	7.79e-10	5.17e-09	6.01578	1	1	http://tritrypdb.org/gene/TcCLB.510089.100
TcCLB.506631.50	hypothetical_protein_conserved	-1.0765	0.00086608	0.000233655	0.00155141	3.29763	1	1	http://tritrypdb.org/gene/TcCLB.506631.50
TcCLB.506515.29	trans-sialidase_putative	-1.07542	0.000104118	3.29e-05	0.000218182	3.6827	1	1	http://tritrypdb.org/gene/TcCLB.506515.29
TcCLB.508387.120	glutaminyl_cyclase_putative	-1.0746	2.17e-09	1.93e-09	1.28e-08	6.17577	1	1	http://tritrypdb.org/gene/TcCLB.508387.120
TcCLB.508211.70	hypothetical_protein_conserved	-1.07408	3.67e-10	4.02e-10	2.67e-09	6.65048	1	1	http://tritrypdb.org/gene/TcCLB.508211.70
TcCLB.507211.30	hypothetical_protein_conserved	-1.07365	2e-09	1.8e-09	1.19e-08	6.20041	1	1	http://tritrypdb.org/gene/TcCLB.507211.30
TcCLB.507677.90	hypothetical_protein_conserved	-1.07299	4.48e-08	2.83e-08	1.88e-07	6.28309	1	1	http://tritrypdb.org/gene/TcCLB.507677.90
TcCLB.508813.70	hypothetical_protein_conserved	-1.07299	1.07e-07	6.17e-08	4.1e-07	5.66323	1	1	http://tritrypdb.org/gene/TcCLB.508813.70
TcCLB.510857.54	hypothetical_protein_conserved	-1.07297	2.13e-08	1.45e-08	9.64e-08	5.75253	1	1	http://tritrypdb.org/gene/TcCLB.510857.54
TcCLB.511181.90	peroxisome_targeting_signal_1_receptor_putative	-1.07236	4.26e-12	8.93e-12	5.93e-11	7.8679	1	1	http://tritrypdb.org/gene/TcCLB.511181.90
TcCLB.447705.19	trafficking_protein_particle_complex_subunit_3_putative	-1.07152	0.266896	0.0470339	0.312294	0.464051	1	0	http://tritrypdb.org/gene/TcCLB.447705.19
TcCLB.511621.80	hypothetical_protein	-1.06995	0.0156722	0.00345645	0.02295	3.8705	1	1	http://tritrypdb.org/gene/TcCLB.511621.80
TcCLB.509543.10	hypothetical_protein	-1.06755	0.000144501	4.45e-05	0.000295642	4.05429	1	1	http://tritrypdb.org/gene/TcCLB.509543.10
TcCLB.507041.10	hypothetical_protein_conserved	-1.0669	1.16e-10	1.48e-10	9.83e-10	6.99358	1	1	http://tritrypdb.org/gene/TcCLB.507041.10
TcCLB.510287.50	hypothetical_protein_conserved	-1.06677	4.04e-09	3.34e-09	2.22e-08	5.4991	1	1	http://tritrypdb.org/gene/TcCLB.510287.50
TcCLB.506755.200	hypothetical_protein_conserved	-1.06668	1.71e-07	9.36e-08	6.21e-07	5.17862	1	1	http://tritrypdb.org/gene/TcCLB.506755.200
TcCLB.506211.210	protein_kinase_putativemitogen-activated_protein_kinase_putative	-1.06658	2.06e-11	3.36e-11	2.23e-10	6.91563	1	1	http://tritrypdb.org/gene/TcCLB.506211.210
TcCLB.506795.44	hypothetical_protein_conserved	-1.06651	2.48e-11	3.92e-11	2.6e-10	8.53608	1	1	http://tritrypdb.org/gene/TcCLB.506795.44
TcCLB.510717.40	hypothetical_protein_conserved	-1.06649	4.11e-10	4.46e-10	2.96e-09	6.5743	1	1	http://tritrypdb.org/gene/TcCLB.510717.40
TcCLB.506503.90	kinesin_putative	-1.06634	6.11e-06	2.4e-06	1.6e-05	5.34013	1	1	http://tritrypdb.org/gene/TcCLB.506503.90
TcCLB.510721.21	hypothetical_protein	-1.06632	0.000766693	0.000208807	0.00138643	4.26715	1	1	http://tritrypdb.org/gene/TcCLB.510721.21
TcCLB.511575.20	hypothetical_protein_conserved	-1.06522	2.34e-08	1.58e-08	1.05e-07	4.90001	1	1	http://tritrypdb.org/gene/TcCLB.511575.20
TcCLB.507611.310	eukaryotic_translation_initiation_factor_3_subunit_8_putative	-1.06422	1.63e-09	1.5e-09	9.93e-09	8.43296	1	1	http://tritrypdb.org/gene/TcCLB.507611.310
TcCLB.506211.160	ADPATP_carrier_protein_1_mitochondrial_precursor_putativeADP/ATP_translocase_1_putative	-1.06328	1.12e-08	8.16e-09	5.42e-08	8.97544	1	1	http://tritrypdb.org/gene/TcCLB.506211.160
TcCLB.507485.110	hypothetical_protein_conserved	-1.0621	3.57e-12	7.7e-12	5.12e-11	7.36861	1	1	http://tritrypdb.org/gene/TcCLB.507485.110
TcCLB.505987.41	hypothetical_protein_conserved	-1.06208	1.49e-06	6.62e-07	4.4e-06	4.78443	1	1	http://tritrypdb.org/gene/TcCLB.505987.41
TcCLB.503689.20	hypothetical_protein_conserved	-1.06187	0.000139391	4.31e-05	0.000286251	4.51775	1	1	http://tritrypdb.org/gene/TcCLB.503689.20
TcCLB.510347.40	hypothetical_protein_conserved	-1.05974	1.25e-09	1.19e-09	7.88e-09	6.32555	1	1	http://tritrypdb.org/gene/TcCLB.510347.40
TcCLB.506401.240	hypothetical_protein_conserved	-1.05964	9.08e-12	1.69e-11	1.12e-10	7.34576	1	1	http://tritrypdb.org/gene/TcCLB.506401.240
TcCLB.468941.9	ATP-dependent_DEAD/H_RNA_helicase_putative	-1.05928	2.97e-09	2.55e-09	1.7e-08	7.15904	1	1	http://tritrypdb.org/gene/TcCLB.468941.9
TcCLB.506755.240	hypothetical_protein_conserved	-1.05896	1.58e-05	5.72e-06	3.8e-05	4.08202	1	1	http://tritrypdb.org/gene/TcCLB.506755.240
TcCLB.511537.21	hypothetical_protein_conserved	-1.05872	3e-07	1.55e-07	1.03e-06	5.23393	1	1	http://tritrypdb.org/gene/TcCLB.511537.21
TcCLB.510857.40	RNA-editing_complex_protein_putative	-1.0583	6.89e-10	7.05e-10	4.68e-09	6.33435	1	1	http://tritrypdb.org/gene/TcCLB.510857.40
TcCLB.504935.20	hypothetical_protein_conserved	-1.05706	9.47e-09	7.03e-09	4.67e-08	5.98006	1	1	http://tritrypdb.org/gene/TcCLB.504935.20
TcCLB.503757.49	hypothetical_protein_conserved	-1.0548	0.00119831	0.000316299	0.00210015	4.05916	1	1	http://tritrypdb.org/gene/TcCLB.503757.49
TcCLB.510841.20	hypothetical_protein_conserved	-1.05453	0.000133789	4.15e-05	0.000275503	4.76019	1	1	http://tritrypdb.org/gene/TcCLB.510841.20
TcCLB.509537.60	meiosis_recombination_protein_SPO11_putative	-1.05269	1.32e-08	9.38e-09	6.23e-08	5.36646	1	1	http://tritrypdb.org/gene/TcCLB.509537.60
TcCLB.511145.40	peroxin_14_putative	-1.05225	3.36e-08	2.18e-08	1.45e-07	6.67015	1	1	http://tritrypdb.org/gene/TcCLB.511145.40
TcCLB.503899.130	glutathione_peroxidase-like_protein_putative	-1.0509	4.25e-11	6.18e-11	4.11e-10	6.29904	1	1	http://tritrypdb.org/gene/TcCLB.503899.130
TcCLB.504075.10	RNA_polymerase_I_putative	-1.05051	2.53e-07	1.33e-07	8.81e-07	5.89301	1	1	http://tritrypdb.org/gene/TcCLB.504075.10
TcCLB.508975.20	hypothetical_protein_conserved	-1.04983	2.62e-09	2.28e-09	1.52e-08	6.63455	1	1	http://tritrypdb.org/gene/TcCLB.508975.20
TcCLB.511445.10	calpain-like_cysteine_peptidase_putativecysteine_peptidase_Clan_CA_family_C2_putative	-1.04979	0.000989356	0.000264333	0.00175511	4.14658	1	1	http://tritrypdb.org/gene/TcCLB.511445.10
TcCLB.510759.150	hypothetical_protein_conserved	-1.04944	1.39e-10	1.73e-10	1.15e-09	6.80089	1	1	http://tritrypdb.org/gene/TcCLB.510759.150
TcCLB.509233.40	hypothetical_protein_conserved	-1.04826	2.86e-07	1.48e-07	9.83e-07	5.71185	1	1	http://tritrypdb.org/gene/TcCLB.509233.40
TcCLB.430895.4	hypothetical_protein_conserved	-1.04819	0.000380045	0.000109145	0.000724696	3.73071	1	1	http://tritrypdb.org/gene/TcCLB.430895.4
TcCLB.510101.90	hypothetical_protein_conserved	-1.04808	6.04e-10	6.28e-10	4.17e-09	7.7412	1	1	http://tritrypdb.org/gene/TcCLB.510101.90
TcCLB.506715.44	hypothetical_protein_conserved	-1.04808	2.03e-05	7.21e-06	4.79e-05	4.38658	1	1	http://tritrypdb.org/gene/TcCLB.506715.44
TcCLB.503909.68	hypothetical_protein_conserved	-1.0466	8.42e-06	3.22e-06	2.14e-05	5.29376	1	1	http://tritrypdb.org/gene/TcCLB.503909.68
TcCLB.503885.30	hypothetical_protein_conserved_(pseudogene)	-1.0466	5.24e-08	3.24e-08	2.15e-07	5.76976	1	1	http://tritrypdb.org/gene/TcCLB.503885.30
TcCLB.407477.30	diphthine_synthase_putative	-1.04556	2.73e-08	1.81e-08	1.21e-07	5.52317	1	1	http://tritrypdb.org/gene/TcCLB.407477.30
TcCLB.510507.40	transmembrane_amino_acid_transporter_putative	-1.04497	4.62e-08	2.9e-08	1.93e-07	5.81792	1	1	http://tritrypdb.org/gene/TcCLB.510507.40
TcCLB.506963.40	hypothetical_protein_conserved	-1.04495	1.29e-11	2.26e-11	1.5e-10	6.6039	1	1	http://tritrypdb.org/gene/TcCLB.506963.40
TcCLB.503449.10	60S_ribosomal_protein_L17_putative	-1.04473	6.8e-09	5.26e-09	3.49e-08	9.32754	1	1	http://tritrypdb.org/gene/TcCLB.503449.10
TcCLB.508973.30	hypothetical_protein_conserved	-1.04417	1.92e-06	8.35e-07	5.54e-06	5.75756	1	1	http://tritrypdb.org/gene/TcCLB.508973.30
TcCLB.510877.60	ruvB-like_DNA_helicase_putativeATP-dependent_DNA_helicase_putative	-1.0431	3.37e-11	5.05e-11	3.35e-10	7.69578	1	1	http://tritrypdb.org/gene/TcCLB.510877.60
TcCLB.511469.24	ADP-ribosylation_factor-like_2_arl2_putative	-1.04254	0.000114959	3.6e-05	0.000239033	4.51135	1	1	http://tritrypdb.org/gene/TcCLB.511469.24
TcCLB.508647.290	DNA_repair_and_recombination_protein_RAD54_putative	-1.0424	3.65e-11	5.41e-11	3.59e-10	8.68094	1	1	http://tritrypdb.org/gene/TcCLB.508647.290
TcCLB.511527.60	hypothetical_protein_conserved	-1.0414	1e-05	3.78e-06	2.51e-05	4.71185	1	1	http://tritrypdb.org/gene/TcCLB.511527.60
TcCLB.504203.10	hypothetical_protein_conserved	-1.03933	5.7e-07	2.77e-07	1.84e-06	6.43019	1	1	http://tritrypdb.org/gene/TcCLB.504203.10
TcCLB.503897.120	hypothetical_protein_conserved	-1.03895	3.84e-12	8.18e-12	5.43e-11	7.20538	1	1	http://tritrypdb.org/gene/TcCLB.503897.120
TcCLB.508831.60	sodium/sulphate_symporter_putative	-1.03877	9.26e-10	9.09e-10	6.04e-09	6.65177	1	1	http://tritrypdb.org/gene/TcCLB.508831.60
TcCLB.507603.50	hypothetical_protein_conserved	-1.03798	7.53e-10	7.62e-10	5.06e-09	6.23628	1	1	http://tritrypdb.org/gene/TcCLB.507603.50
TcCLB.510609.50	nuclear_receptor_binding_factor_putative	-1.03766	1.15e-06	5.26e-07	3.49e-06	5.50495	1	1	http://tritrypdb.org/gene/TcCLB.510609.50
TcCLB.506467.40	serine/threonine_protein_kinase_putative	-1.03731	9.4e-05	2.99e-05	0.000198638	6.25523	1	1	http://tritrypdb.org/gene/TcCLB.506467.40
TcCLB.508951.4	protein_kinase_putative	-1.03718	0.000112981	3.54e-05	0.000235248	4.06446	1	1	http://tritrypdb.org/gene/TcCLB.508951.4
TcCLB.506239.30	lectin_putative	-1.03696	2.02e-07	1.09e-07	7.21e-07	6.83487	1	1	http://tritrypdb.org/gene/TcCLB.506239.30
TcCLB.504179.100	hypothetical_protein_conserved	-1.03618	6.29e-06	2.47e-06	1.64e-05	5.15205	1	1	http://tritrypdb.org/gene/TcCLB.504179.100
TcCLB.511397.21	elongation_factor_1-gamma_(EF-1-gamma_pseudogene)_putative	-1.03582	0.0257146	0.00547584	0.0363583	2.08876	1	1	http://tritrypdb.org/gene/TcCLB.511397.21
TcCLB.506743.135	trans-sialidase_(pseudogene)_putative	-1.03575	0.000511659	0.000143875	0.000955297	3.22975	1	1	http://tritrypdb.org/gene/TcCLB.506743.135
TcCLB.508837.120	prohibitin_putative	-1.03396	3.71e-11	5.49e-11	3.65e-10	7.36891	1	1	http://tritrypdb.org/gene/TcCLB.508837.120
TcCLB.509499.20	beta_propeller_protein_putative	-1.03358	3.03e-08	1.98e-08	1.32e-07	6.43049	1	1	http://tritrypdb.org/gene/TcCLB.509499.20
TcCLB.510287.4	NUDIX_hydrolase_putative	-1.03332	0.000752486	0.000205258	0.00136286	3.27206	1	1	http://tritrypdb.org/gene/TcCLB.510287.4
TcCLB.506239.40	hypothetical_protein_conserved	-1.03317	6.13e-08	3.72e-08	2.47e-07	5.45141	1	1	http://tritrypdb.org/gene/TcCLB.506239.40
TcCLB.510167.4	hypothetical_protein_conserved	-1.03252	1.57e-06	6.97e-07	4.63e-06	5.21012	1	1	http://tritrypdb.org/gene/TcCLB.510167.4
TcCLB.507739.59	hypothetical_protein_conserved	-1.03233	3.54e-06	1.46e-06	9.71e-06	4.69835	1	1	http://tritrypdb.org/gene/TcCLB.507739.59
TcCLB.510149.130	hypothetical_protein_conserved	-1.03196	4.91e-07	2.42e-07	1.61e-06	5.66831	1	1	http://tritrypdb.org/gene/TcCLB.510149.130
TcCLB.506519.130	guanosine_monophosphate_reductase_putative	-1.03177	6.68e-10	6.87e-10	4.56e-09	8.06216	1	1	http://tritrypdb.org/gene/TcCLB.506519.130
TcCLB.506799.150	surface_protease_GP63_(pseudogene)_putative	-1.03146	1.65e-05	5.97e-06	3.96e-05	3.89858	1	1	http://tritrypdb.org/gene/TcCLB.506799.150
TcCLB.504181.30	40S_ribosomal_protein_S23_putative	-1.03136	1.09e-09	1.05e-09	6.98e-09	8.37677	1	1	http://tritrypdb.org/gene/TcCLB.504181.30
TcCLB.510859.50	hypothetical_protein_conserved	-1.03111	3.81e-05	1.29e-05	8.54e-05	5.03462	1	1	http://tritrypdb.org/gene/TcCLB.510859.50
TcCLB.510379.20	hypothetical_protein	-1.03076	0.00029086	8.52e-05	0.000565454	3.6426	1	1	http://tritrypdb.org/gene/TcCLB.510379.20
TcCLB.511075.40	cullin_putative	-1.03073	7.92e-08	4.67e-08	3.1e-07	6.24047	1	1	http://tritrypdb.org/gene/TcCLB.511075.40
TcCLB.441241.10	microtubule-associated_protein_Gb4_putative	-1.03039	0.00208171	0.000527561	0.00350288	4.88271	1	1	http://tritrypdb.org/gene/TcCLB.441241.10
TcCLB.503887.40	hypothetical_protein_conserved	-1.03016	3.37e-08	2.19e-08	1.45e-07	7.14372	1	1	http://tritrypdb.org/gene/TcCLB.503887.40
TcCLB.503713.30	6-phosphogluconolactonase_putative	-1.03003	4.59e-09	3.74e-09	2.48e-08	5.94563	1	1	http://tritrypdb.org/gene/TcCLB.503713.30
TcCLB.507603.30	hypothetical_protein_conserved	-1.02981	6.15e-06	2.42e-06	1.61e-05	5.42512	1	1	http://tritrypdb.org/gene/TcCLB.507603.30
TcCLB.479517.30	hypothetical_protein	-1.02981	0.00160662	0.000414425	0.00275169	3.18704	1	1	http://tritrypdb.org/gene/TcCLB.479517.30
TcCLB.511111.20	hypothetical_protein	-1.02972	4.37e-10	4.71e-10	3.13e-09	6.46513	1	1	http://tritrypdb.org/gene/TcCLB.511111.20
TcCLB.511053.10	hypothetical_protein_conserved	-1.02955	4.09e-08	2.6e-08	1.73e-07	5.8473	1	1	http://tritrypdb.org/gene/TcCLB.511053.10
TcCLB.511069.20	40S_ribosomal_protein_S8_putative	-1.02931	0.000603467	0.000167568	0.00111261	9.34734	1	1	http://tritrypdb.org/gene/TcCLB.511069.20
TcCLB.510311.110	hypothetical_protein_conserved	-1.02789	2.08e-07	1.11e-07	7.39e-07	5.91865	1	1	http://tritrypdb.org/gene/TcCLB.510311.110
TcCLB.503487.20	hypothetical_protein	-1.02775	2.69e-11	4.18e-11	2.78e-10	7.01208	1	1	http://tritrypdb.org/gene/TcCLB.503487.20
TcCLB.510295.50	protein_kinase_putativemitogen-activated_protein_kinase_putative	-1.02691	3.98e-07	2e-07	1.33e-06	5.54367	1	1	http://tritrypdb.org/gene/TcCLB.510295.50
TcCLB.509965.229	heat_shock_protein_(pseudogene)_putative	-1.02634	1.65e-07	9.04e-08	6e-07	5.32335	1	1	http://tritrypdb.org/gene/TcCLB.509965.229
TcCLB.506715.30	hypothetical_protein	-1.02573	1.56e-07	8.61e-08	5.72e-07	5.06183	1	1	http://tritrypdb.org/gene/TcCLB.506715.30
TcCLB.508145.40	hypothetical_protein_conserved	-1.02554	1.55e-07	8.56e-08	5.68e-07	5.82938	1	1	http://tritrypdb.org/gene/TcCLB.508145.40
TcCLB.507671.39	serine/threonine-protein_phosphatase_PP1	-1.0255	9.46e-07	4.4e-07	2.92e-06	4.85863	1	1	http://tritrypdb.org/gene/TcCLB.507671.39
TcCLB.508567.70	peptidyl-prolyl_cis-trans_isomerase	-1.02534	1.21e-07	6.9e-08	4.58e-07	5.55608	1	1	http://tritrypdb.org/gene/TcCLB.508567.70
TcCLB.507089.260	CYC2-like_cyclin_putativecyclin_6_putative	-1.02497	1.78e-08	1.23e-08	8.19e-08	5.98433	1	1	http://tritrypdb.org/gene/TcCLB.507089.260
TcCLB.506945.310	hypothetical_protein_conserved	-1.02486	7.42e-08	4.41e-08	2.93e-07	5.17156	1	1	http://tritrypdb.org/gene/TcCLB.506945.310
TcCLB.506745.4	hypothetical_protein_conserved	-1.02387	0.000404707	0.000115744	0.000768513	3.56506	1	1	http://tritrypdb.org/gene/TcCLB.506745.4
TcCLB.506529.80	hypothetical_protein_conserved	-1.02341	1.14e-07	6.54e-08	4.34e-07	8.0017	1	1	http://tritrypdb.org/gene/TcCLB.506529.80
TcCLB.510533.100	hypothetical_protein_conserved	-1.02313	7.41e-07	3.52e-07	2.34e-06	5.7926	1	1	http://tritrypdb.org/gene/TcCLB.510533.100
TcCLB.503899.30	40S_ribosomal_protein_S16_putative	-1.0229	1.67e-05	6.03e-06	4e-05	8.99882	1	1	http://tritrypdb.org/gene/TcCLB.503899.30
TcCLB.510165.54	hypothetical_protein_conserved	-1.02242	1.64e-07	8.99e-08	5.97e-07	5.0976	1	1	http://tritrypdb.org/gene/TcCLB.510165.54
TcCLB.509895.80	ATP-dependent_zinc_metallopeptidase_(pseudogene)_putativemetallo-peptidase_clan_MA(E)_family_M41_(pseudogene)_putative	-1.0223	3.84e-09	3.19e-09	2.12e-08	6.90543	1	1	http://tritrypdb.org/gene/TcCLB.509895.80
TcCLB.511589.90	hypothetical_protein_conserved	-1.0222	3.17e-08	2.07e-08	1.37e-07	6.45421	1	1	http://tritrypdb.org/gene/TcCLB.511589.90
TcCLB.510089.200	hypothetical_protein_conserved	-1.02202	3.77e-10	4.12e-10	2.74e-09	7.41056	1	1	http://tritrypdb.org/gene/TcCLB.510089.200
TcCLB.510749.90	hypothetical_protein_conserved	-1.02178	1.08e-06	4.95e-07	3.29e-06	5.00034	1	1	http://tritrypdb.org/gene/TcCLB.510749.90
TcCLB.506637.10	hypothetical_protein_conserved	-1.02169	1.46e-07	8.13e-08	5.4e-07	5.95466	1	1	http://tritrypdb.org/gene/TcCLB.506637.10
TcCLB.507047.70	hypothetical_protein_conserved	-1.02152	6.22e-06	2.44e-06	1.62e-05	4.61061	1	1	http://tritrypdb.org/gene/TcCLB.507047.70
TcCLB.510767.30	hypothetical_protein	-1.0214	5.34e-07	2.62e-07	1.74e-06	4.91024	1	1	http://tritrypdb.org/gene/TcCLB.510767.30
TcCLB.511337.30	UDP-Gal_or_UDP-GlcNAc-dependent_glycosyltransferase_putative	-1.02075	1.29e-06	5.84e-07	3.88e-06	4.29805	1	1	http://tritrypdb.org/gene/TcCLB.511337.30
TcCLB.506401.170	plasma_membrane_Ca2_ATPase	-1.0207	6.88e-07	3.29e-07	2.19e-06	7.0092	1	1	http://tritrypdb.org/gene/TcCLB.506401.170
TcCLB.507669.190	hypothetical_protein_conserved	-1.02053	5.15e-09	4.11e-09	2.73e-08	6.28676	1	1	http://tritrypdb.org/gene/TcCLB.507669.190
TcCLB.503981.9	hypothetical_protein_conserved_(pseudogene)	-1.01956	3.7e-07	1.87e-07	1.24e-06	4.87071	1	1	http://tritrypdb.org/gene/TcCLB.503981.9
TcCLB.507009.10	Gim5A_protein_putativeglycosomal_membrane_protein_putative	-1.01792	2.32e-08	1.56e-08	1.04e-07	8.38683	1	1	http://tritrypdb.org/gene/TcCLB.507009.10
TcCLB.508379.10	fucose_kinase_putative	-1.01721	5.72e-07	2.78e-07	1.85e-06	4.98766	1	1	http://tritrypdb.org/gene/TcCLB.508379.10
TcCLB.504431.30	hypothetical_protein_conserved	-1.01703	2.78e-07	1.44e-07	9.59e-07	6.70447	1	1	http://tritrypdb.org/gene/TcCLB.504431.30
TcCLB.508515.60	hypothetical_protein_conserved	-1.01655	8.58e-08	5.03e-08	3.34e-07	5.69291	1	1	http://tritrypdb.org/gene/TcCLB.508515.60
TcCLB.503529.20	hypothetical_protein_conserved	-1.0165	3.92e-10	4.26e-10	2.83e-09	6.94787	1	1	http://tritrypdb.org/gene/TcCLB.503529.20
TcCLB.509233.200	hypothetical_protein_conserved	-1.01647	6.22e-08	3.77e-08	2.5e-07	7.56748	1	1	http://tritrypdb.org/gene/TcCLB.509233.200
TcCLB.510313.20	hypothetical_protein_conserved	-1.01636	1.05e-09	1.02e-09	6.76e-09	6.80709	1	1	http://tritrypdb.org/gene/TcCLB.510313.20
TcCLB.506401.250	hypothetical_protein_conserved	-1.01618	9.14e-11	1.21e-10	8.02e-10	7.5778	1	1	http://tritrypdb.org/gene/TcCLB.506401.250
TcCLB.511693.10	hypothetical_protein	-1.01519	5.9e-09	4.63e-09	3.08e-08	7.08834	1	1	http://tritrypdb.org/gene/TcCLB.511693.10
TcCLB.511211.104	hypothetical_protein_conserved	-1.01507	6.14e-07	2.97e-07	1.97e-06	5.07065	1	1	http://tritrypdb.org/gene/TcCLB.511211.104
TcCLB.504431.64	high_mobility_group_protein_putative	-1.01499	2.32e-08	1.57e-08	1.04e-07	8.49657	1	1	http://tritrypdb.org/gene/TcCLB.504431.64
TcCLB.503887.10	hypothetical_protein_conserved	-1.01417	3.34e-08	2.17e-08	1.44e-07	5.42942	1	1	http://tritrypdb.org/gene/TcCLB.503887.10
TcCLB.503955.10	mitochondrial_DNA_polymerase_beta-PAK_putative	-1.01406	3.66e-09	3.06e-09	2.03e-08	5.25878	1	1	http://tritrypdb.org/gene/TcCLB.503955.10
TcCLB.507089.240	hypothetical_protein_conserved	-1.01348	1.52e-07	8.41e-08	5.58e-07	5.19362	1	1	http://tritrypdb.org/gene/TcCLB.507089.240
TcCLB.507143.60	hypothetical_protein	-1.01328	0.117789	0.0222984	0.148056	0.858339	1	0	http://tritrypdb.org/gene/TcCLB.507143.60
TcCLB.509599.120	hypothetical_protein_conserved	-1.01317	2.65e-07	1.38e-07	9.19e-07	5.54168	1	1	http://tritrypdb.org/gene/TcCLB.509599.120
TcCLB.504229.4	retrotransposon_hot_spot_(RHS)_protein_putative	-1.01304	4.64e-06	1.86e-06	1.24e-05	4.79666	1	1	http://tritrypdb.org/gene/TcCLB.504229.4
TcCLB.506025.30	hypothetical_protein_conserved	-1.01299	2.91e-07	1.51e-07	1e-06	5.24763	1	1	http://tritrypdb.org/gene/TcCLB.506025.30
TcCLB.511179.150	alanine_racemase_putative	-1.01276	3e-08	1.97e-08	1.31e-07	4.83759	1	1	http://tritrypdb.org/gene/TcCLB.511179.150
TcCLB.503697.40	hypothetical_protein	-1.01226	1.67e-05	6.03e-06	4e-05	4.33201	1	1	http://tritrypdb.org/gene/TcCLB.503697.40
TcCLB.511181.30	hypothetical_protein_conserved	-1.01166	3.11e-05	1.07e-05	7.08e-05	4.5435	1	1	http://tritrypdb.org/gene/TcCLB.511181.30
TcCLB.506753.110	cytochrome_b5-like_protein_putative	-1.00958	6.31e-06	2.48e-06	1.64e-05	5.97112	1	1	http://tritrypdb.org/gene/TcCLB.506753.110
TcCLB.503885.20	hypothetical_protein_conserved	-1.00888	9.71e-11	1.28e-10	8.47e-10	6.97811	1	1	http://tritrypdb.org/gene/TcCLB.503885.20
TcCLB.511575.60	isocitrate_dehydrogenase_[NADP]_mitochondrial_precursor_putative	-1.00886	6.86e-09	5.29e-09	3.51e-08	7.25495	1	1	http://tritrypdb.org/gene/TcCLB.511575.60
TcCLB.507867.50	hypothetical_protein_conserved	-1.00846	1.85e-05	6.6e-06	4.38e-05	5.02945	1	1	http://tritrypdb.org/gene/TcCLB.507867.50
TcCLB.511621.40	hypothetical_protein_conserved	-1.00807	7.61e-07	3.6e-07	2.39e-06	6.10451	1	1	http://tritrypdb.org/gene/TcCLB.511621.40
TcCLB.511801.4	hypothetical_protein_conserved	-1.00728	2.21e-09	1.96e-09	1.3e-08	5.59835	1	1	http://tritrypdb.org/gene/TcCLB.511801.4
TcCLB.506763.370	hypothetical_protein	-1.00681	0.0135212	0.00300859	0.0199763	1.71342	1	1	http://tritrypdb.org/gene/TcCLB.506763.370
TcCLB.506203.70	pre-mRNA_splicing_factor_putative	-1.00668	4.8e-08	2.99e-08	1.98e-07	7.11402	1	1	http://tritrypdb.org/gene/TcCLB.506203.70
TcCLB.511043.30	DnaJ_chaperone_protein_putativeheat_shock_protein_40_kDa_putative	-1.00667	1.16e-10	1.48e-10	9.83e-10	7.95602	1	1	http://tritrypdb.org/gene/TcCLB.511043.30
TcCLB.506945.359	damage-specific_DNA_binding_protein_putative	-1.00567	1.32e-06	5.95e-07	3.95e-06	5.55604	1	1	http://tritrypdb.org/gene/TcCLB.506945.359
TcCLB.503669.39	hypothetical_protein_conserved	-1.00564	7.26e-07	3.46e-07	2.3e-06	4.6722	1	1	http://tritrypdb.org/gene/TcCLB.503669.39
TcCLB.511313.30	formin_putative	-1.00513	0.00138325	0.000360764	0.00239539	3.50141	1	1	http://tritrypdb.org/gene/TcCLB.511313.30
TcCLB.506517.110	hypothetical_protein_conserved	-1.00498	8.52e-06	3.26e-06	2.16e-05	5.03175	1	1	http://tritrypdb.org/gene/TcCLB.506517.110
TcCLB.508569.140	hypothetical_protein_conserved	-1.00337	1.96e-06	8.53e-07	5.67e-06	5.13125	1	1	http://tritrypdb.org/gene/TcCLB.508569.140
TcCLB.508357.9	hypothetical_protein_conserved	-1.0032	2.18e-06	9.37e-07	6.22e-06	6.69301	1	1	http://tritrypdb.org/gene/TcCLB.508357.9
TcCLB.504103.6	hypothetical_protein_conserved	-1.00318	6.46e-05	2.11e-05	0.000139894	4.40194	1	1	http://tritrypdb.org/gene/TcCLB.504103.6
TcCLB.506739.60	hypothetical_protein_conserved	-1.00307	2.52e-08	1.69e-08	1.12e-07	6.09199	1	1	http://tritrypdb.org/gene/TcCLB.506739.60
TcCLB.508647.80	hypothetical_protein_conserved	-1.00236	8.07e-08	4.75e-08	3.16e-07	5.92936	1	1	http://tritrypdb.org/gene/TcCLB.508647.80
TcCLB.503749.20	hypothetical_protein	-1.002	2.3e-08	1.56e-08	1.03e-07	6.0203	1	1	http://tritrypdb.org/gene/TcCLB.503749.20
TcCLB.510213.110	NADH-dependent_fumarate_reductase_putative	-1.00184	4.67e-09	3.79e-09	2.52e-08	6.58849	1	1	http://tritrypdb.org/gene/TcCLB.510213.110
TcCLB.509669.140	hypothetical_protein_conserved	-1.00163	6.19e-08	3.75e-08	2.49e-07	5.32095	1	1	http://tritrypdb.org/gene/TcCLB.509669.140
TcCLB.506933.24	hypothetical_protein_conserved	-1.00141	2.7e-07	1.41e-07	9.35e-07	5.18012	1	1	http://tritrypdb.org/gene/TcCLB.506933.24
TcCLB.506943.110	hypothetical_protein	-1.00115	9.08e-05	2.9e-05	0.000192409	5.02585	1	1	http://tritrypdb.org/gene/TcCLB.506943.110
TcCLB.510811.10	hypothetical_protein_conserved	-1.00102	8.34e-09	6.29e-09	4.18e-08	6.43201	1	1	http://tritrypdb.org/gene/TcCLB.510811.10
TcCLB.508277.160	glutaminyl-tRNA_synthetase_putative	-1.00075	6.57e-13	1.86e-12	1.24e-11	7.9821	1	1	http://tritrypdb.org/gene/TcCLB.508277.160
TcCLB.509965.20	hypothetical_protein	-1.00029	8.83e-08	5.16e-08	3.43e-07	6.1306	1	1	http://tritrypdb.org/gene/TcCLB.509965.20
TcCLB.510091.14	hypothetical_protein_conserved	-1.00023	3.33e-07	1.7e-07	1.13e-06	4.96341	1	1	http://tritrypdb.org/gene/TcCLB.510091.14
TcCLB.509777.10	hypothetical_protein	-1.00011	0.000477195	0.000134882	0.000895585	3.59239	1	1	http://tritrypdb.org/gene/TcCLB.509777.10
TcCLB.510609.80	hypothetical_protein_conserved	1	3.25e-08	2.12e-08	1.41e-07	5.68957	1	1	http://tritrypdb.org/gene/TcCLB.510609.80
TcCLB.506457.50	serine/threonine_protein_kinase_putative	1.00122	1.67e-08	1.16e-08	7.73e-08	6.81913	1	1	http://tritrypdb.org/gene/TcCLB.506457.50
TcCLB.506777.30	hypothetical_protein_conserved	1.00222	3.24e-11	4.88e-11	3.24e-10	6.79298	1	1	http://tritrypdb.org/gene/TcCLB.506777.30
TcCLB.507037.70	hypothetical_protein_conserved	1.00365	9.69e-11	1.27e-10	8.46e-10	6.87535	1	1	http://tritrypdb.org/gene/TcCLB.507037.70
TcCLB.511471.10	hypothetical_protein_conserved_(pseudogene)	1.00369	4.89e-08	3.04e-08	2.02e-07	5.54352	1	1	http://tritrypdb.org/gene/TcCLB.511471.10
TcCLB.506777.40	hypothetical_protein_conserved	1.00417	2.1e-09	1.87e-09	1.24e-08	6.72754	1	1	http://tritrypdb.org/gene/TcCLB.506777.40
TcCLB.510077.30	protein_kinase_putativeNIMA/Nek_Serine/threonine-protein_kinase_family_putative	1.00622	1.65e-05	5.95e-06	3.95e-05	5.45953	1	1	http://tritrypdb.org/gene/TcCLB.510077.30
TcCLB.511407.70	hypothetical_protein_conserved	1.00629	2.54e-06	1.08e-06	7.15e-06	7.24569	1	1	http://tritrypdb.org/gene/TcCLB.511407.70
TcCLB.507035.70	hypothetical_protein	1.00636	9.92e-05	3.14e-05	0.000208558	4.32094	1	1	http://tritrypdb.org/gene/TcCLB.507035.70
TcCLB.507625.150	hypothetical_protein_conserved	1.00642	3.38e-08	2.19e-08	1.45e-07	5.63054	1	1	http://tritrypdb.org/gene/TcCLB.507625.150
TcCLB.511737.50	hypothetical_protein_conserved	1.00696	4.22e-09	3.47e-09	2.3e-08	5.60925	1	1	http://tritrypdb.org/gene/TcCLB.511737.50
TcCLB.510611.70	hypothetical_protein_conserved	1.00704	2.47e-10	2.84e-10	1.89e-09	6.8909	1	1	http://tritrypdb.org/gene/TcCLB.510611.70
TcCLB.504431.10	hypothetical_protein_conserved	1.00815	7.09e-11	9.71e-11	6.44e-10	6.75815	1	1	http://tritrypdb.org/gene/TcCLB.504431.10
TcCLB.506501.150	surface_protease_GP63_(pseudogene)_putative	1.00936	0.0398172	0.00820079	0.0544514	1.85271	1	0	http://tritrypdb.org/gene/TcCLB.506501.150
TcCLB.511737.90	hypothetical_protein_conserved	1.00947	5.64e-08	3.46e-08	2.3e-07	7.46169	1	1	http://tritrypdb.org/gene/TcCLB.511737.90
TcCLB.507625.10	retrotransposon_hot_spot_(RHS)_protein_putative	1.01015	1.27e-07	7.17e-08	4.76e-07	9.60798	1	1	http://tritrypdb.org/gene/TcCLB.507625.10
TcCLB.506661.50	hypothetical_protein_conserved	1.01255	1.17e-11	2.07e-11	1.38e-10	7.69604	1	1	http://tritrypdb.org/gene/TcCLB.506661.50
TcCLB.507993.310	transporter_putativemajor_facilitator_superfamily_protein_(MFS)_putative	1.01365	4.99e-09	4.01e-09	2.66e-08	7.06784	1	1	http://tritrypdb.org/gene/TcCLB.507993.310
TcCLB.506737.121	mucin-associated_surface_protein_(MASP_pseudogene)_putative	1.01376	9.79e-08	5.67e-08	3.76e-07	7.22739	1	1	http://tritrypdb.org/gene/TcCLB.506737.121
TcCLB.510101.160	hypothetical_protein_conserved	1.01489	2.81e-07	1.46e-07	9.69e-07	5.56635	1	1	http://tritrypdb.org/gene/TcCLB.510101.160
TcCLB.507035.110	cyclic_nucleotide-binding_protein_putative	1.01571	2.1e-08	1.43e-08	9.53e-08	6.21679	1	1	http://tritrypdb.org/gene/TcCLB.507035.110
TcCLB.509073.80	hypothetical_protein_conserved	1.01603	9.43e-09	7e-09	4.65e-08	5.91229	1	1	http://tritrypdb.org/gene/TcCLB.509073.80
TcCLB.507625.90	hypothetical_protein_conserved	1.0196	9.13e-07	4.26e-07	2.83e-06	5.86592	1	1	http://tritrypdb.org/gene/TcCLB.507625.90
TcCLB.506289.80	small_GTP-binding_protein_Rab32_putative	1.02078	4.66e-08	2.92e-08	1.94e-07	6.64264	1	1	http://tritrypdb.org/gene/TcCLB.506289.80
TcCLB.509153.110	hypothetical_protein	1.02195	3.84e-10	4.2e-10	2.79e-09	6.74773	1	1	http://tritrypdb.org/gene/TcCLB.509153.110
TcCLB.408437.20	hypothetical_protein_conserved	1.02297	1.41e-05	5.15e-06	3.42e-05	6.1514	1	1	http://tritrypdb.org/gene/TcCLB.408437.20
TcCLB.508239.30	neurobeachin/beige-like_protein_putative	1.02345	1.51e-10	1.87e-10	1.24e-09	8.76744	1	1	http://tritrypdb.org/gene/TcCLB.508239.30
TcCLB.507611.300	U1A_small_nuclear_ribonucleoprotein_putative	1.02361	5.39e-06	2.14e-06	1.42e-05	4.97542	1	1	http://tritrypdb.org/gene/TcCLB.507611.300
TcCLB.506799.50	mucin-associated_surface_protein_(MASP)_putative	1.02367	1.37e-07	7.66e-08	5.09e-07	5.02325	1	1	http://tritrypdb.org/gene/TcCLB.506799.50
TcCLB.511593.51	elongation_factor_1-gamma_(EF-1-gamma_pseudogene)_putative	1.02568	1.66e-06	7.31e-07	4.85e-06	5.14522	1	1	http://tritrypdb.org/gene/TcCLB.511593.51
TcCLB.506885.270	tubulin_tyrosine_ligase_putative	1.0271	9.27e-09	6.91e-09	4.59e-08	6.8999	1	1	http://tritrypdb.org/gene/TcCLB.506885.270
TcCLB.504247.40	RNA_editing_complex_protein_MP90_putativenuclease_putative	1.02773	2.45e-11	3.89e-11	2.58e-10	6.52213	1	1	http://tritrypdb.org/gene/TcCLB.504247.40
TcCLB.506763.270	hypothetical_protein_conserved_(pseudogene)	1.02825	3.38e-05	1.15e-05	7.67e-05	4.4613	1	1	http://tritrypdb.org/gene/TcCLB.506763.270
TcCLB.510879.100	hypothetical_protein	1.0283	1.35e-08	9.58e-09	6.36e-08	5.70325	1	1	http://tritrypdb.org/gene/TcCLB.510879.100
TcCLB.507859.120	dispersed_gene_family_protein_1_(DGF-1)_putative	1.02904	0.0181363	0.00395506	0.0262607	4.68852	1	1	http://tritrypdb.org/gene/TcCLB.507859.120
TcCLB.507953.50	hypothetical_protein	1.03023	0.0665274	0.013152	0.0873261	1.52781	1	0	http://tritrypdb.org/gene/TcCLB.507953.50
TcCLB.510861.50	hypothetical_protein_conserved	1.03094	3.83e-06	1.57e-06	1.04e-05	4.74833	1	1	http://tritrypdb.org/gene/TcCLB.510861.50
TcCLB.510241.124	hypothetical_protein_conserved	1.0318	2.14e-08	1.46e-08	9.68e-08	7.46531	1	1	http://tritrypdb.org/gene/TcCLB.510241.124
TcCLB.508987.30	protein_kinase_putative	1.03187	3.79e-11	5.6e-11	3.72e-10	7.06873	1	1	http://tritrypdb.org/gene/TcCLB.508987.30
TcCLB.509141.10	hypothetical_protein	1.03361	1.54e-11	2.63e-11	1.75e-10	7.33317	1	1	http://tritrypdb.org/gene/TcCLB.509141.10
TcCLB.507083.100	hypothetical_protein_conserved	1.03421	4.51e-11	6.51e-11	4.32e-10	7.58242	1	1	http://tritrypdb.org/gene/TcCLB.507083.100
TcCLB.507641.180	endochitinase_putative	1.03616	2.38e-09	2.09e-09	1.39e-08	5.311	1	1	http://tritrypdb.org/gene/TcCLB.507641.180
TcCLB.507959.224	surface_protease_GP63_(pseudogene)_putative	1.03624	0.00368606	0.000895271	0.00594439	2.64783	1	1	http://tritrypdb.org/gene/TcCLB.507959.224
TcCLB.511709.19	phosphatidylinositol_3-kinase_catalytic_subunit_putative	1.03715	5.73e-08	3.5e-08	2.33e-07	5.22725	1	1	http://tritrypdb.org/gene/TcCLB.511709.19
TcCLB.510323.110	hypothetical_protein_conserved	1.03741	5.46e-05	1.8e-05	0.000119528	4.60143	1	1	http://tritrypdb.org/gene/TcCLB.510323.110
TcCLB.510377.110	hypothetical_protein	1.03742	0.0704849	0.0138821	0.0921739	-0.0638223	1	0	http://tritrypdb.org/gene/TcCLB.510377.110
TcCLB.508125.140	mucin-associated_surface_protein_(MASP)_putative	1.03755	0.0217876	0.00468839	0.0311298	1.52235	1	1	http://tritrypdb.org/gene/TcCLB.508125.140
TcCLB.510261.21	hypothetical_protein	1.03856	0.0111056	0.00250793	0.016652	2.57139	1	1	http://tritrypdb.org/gene/TcCLB.510261.21
TcCLB.508265.70	hypothetical_protein_conserved	1.04015	9.94e-09	7.33e-09	4.87e-08	6.25851	1	1	http://tritrypdb.org/gene/TcCLB.508265.70
TcCLB.507881.110	trans-sialidase_(pseudogene)_putative	1.04086	1.36e-05	5e-06	3.32e-05	5.37515	1	1	http://tritrypdb.org/gene/TcCLB.507881.110
TcCLB.510375.30	hypothetical_protein_conserved_(pseudogene)	1.04152	0.127329	0.023932	0.158903	0.959535	1	0	http://tritrypdb.org/gene/TcCLB.510375.30
TcCLB.506929.54	hypothetical_protein	1.04241	3.2e-06	1.33e-06	8.84e-06	5.56431	1	1	http://tritrypdb.org/gene/TcCLB.506929.54
TcCLB.511747.20	hypothetical_protein_conserved	1.04314	4.49e-08	2.83e-08	1.88e-07	5.98157	1	1	http://tritrypdb.org/gene/TcCLB.511747.20
TcCLB.510307.220	retrotransposon_hot_spot_(RHS)_protein_putative	1.04487	9.64e-09	7.15e-09	4.75e-08	6.31609	1	1	http://tritrypdb.org/gene/TcCLB.510307.220
TcCLB.507941.130	hypothetical_protein_conserved	1.04679	3.23e-08	2.1e-08	1.4e-07	5.85189	1	1	http://tritrypdb.org/gene/TcCLB.507941.130
TcCLB.506529.200	hypothetical_protein_conserved	1.04894	3.93e-08	2.51e-08	1.66e-07	6.34792	1	1	http://tritrypdb.org/gene/TcCLB.506529.200
TcCLB.506891.10	hypothetical_protein_conserved	1.05058	3.93e-11	5.78e-11	3.83e-10	6.6602	1	1	http://tritrypdb.org/gene/TcCLB.506891.10
TcCLB.506605.139	hypothetical_protein_conserved	1.05071	2.62e-07	1.37e-07	9.07e-07	6.7269	1	1	http://tritrypdb.org/gene/TcCLB.506605.139
TcCLB.506779.160	hypothetical_protein_conserved	1.05085	1.66e-09	1.52e-09	1.01e-08	6.33826	1	1	http://tritrypdb.org/gene/TcCLB.506779.160
TcCLB.507941.50	hypothetical_protein_conserved	1.05096	5.1e-08	3.16e-08	2.1e-07	6.52892	1	1	http://tritrypdb.org/gene/TcCLB.507941.50
TcCLB.508385.20	hypothetical_protein_conserved	1.05181	4.53e-09	3.69e-09	2.45e-08	6.13503	1	1	http://tritrypdb.org/gene/TcCLB.508385.20
TcCLB.507237.200	hypothetical_protein	1.05191	0.132619	0.024867	0.165111	0.450383	1	0	http://tritrypdb.org/gene/TcCLB.507237.200
TcCLB.511415.11	retrotransposon_hot_spot_(RHS)_protein_putative	1.05351	3.47e-08	2.24e-08	1.49e-07	6.56917	1	1	http://tritrypdb.org/gene/TcCLB.511415.11
TcCLB.507941.110	hypothetical_protein_conserved	1.05358	7.01e-09	5.38e-09	3.57e-08	7.14949	1	1	http://tritrypdb.org/gene/TcCLB.507941.110
TcCLB.511555.110	hypothetical_protein_conserved	1.05402	7.2e-10	7.32e-10	4.86e-09	8.5704	1	1	http://tritrypdb.org/gene/TcCLB.511555.110
TcCLB.439245.10	mucin_TcMUCII_putative	1.05604	0.0101747	0.00231163	0.0153487	2.63335	1	1	http://tritrypdb.org/gene/TcCLB.439245.10
TcCLB.508539.130	trans-sialidase_(pseudogene)_putative	1.05718	1.56e-07	8.61e-08	5.72e-07	4.81572	1	1	http://tritrypdb.org/gene/TcCLB.508539.130
TcCLB.509847.10	retrotransposon_hot_spot_protein_(RHS_pseudogene)_putative	1.05809	1.3e-06	5.87e-07	3.9e-06	4.64169	1	1	http://tritrypdb.org/gene/TcCLB.509847.10
TcCLB.506775.70	hypothetical_protein_conserved	1.06017	3.79e-11	5.6e-11	3.72e-10	6.87717	1	1	http://tritrypdb.org/gene/TcCLB.506775.70
TcCLB.510373.70	mucin_TcMUCII_putative	1.06033	0.00783801	0.00181182	0.0120301	2.11019	1	1	http://tritrypdb.org/gene/TcCLB.510373.70
TcCLB.506961.20	dispersed_gene_family_protein_1_(DGF-1)_putative	1.06043	0.0015954	0.000412002	0.0027356	4.84844	1	1	http://tritrypdb.org/gene/TcCLB.506961.20
TcCLB.508215.9	protein_kinase_C_substrate_protein_heavy_chain_putative	1.06135	2e-07	1.07e-07	7.12e-07	8.11268	1	1	http://tritrypdb.org/gene/TcCLB.508215.9
TcCLB.506563.220	calpain-like_cysteine_peptidase_putativecysteine_peptidase_Clan_CA_family_C2_putative	1.06151	2.05e-07	1.1e-07	7.28e-07	7.31831	1	1	http://tritrypdb.org/gene/TcCLB.506563.220
TcCLB.509537.20	hypothetical_protein_conserved	1.06313	1.25e-10	1.59e-10	1.05e-09	6.66275	1	1	http://tritrypdb.org/gene/TcCLB.509537.20
TcCLB.510241.5	hypothetical_protein	1.06546	2.34e-09	2.06e-09	1.37e-08	6.40988	1	1	http://tritrypdb.org/gene/TcCLB.510241.5
TcCLB.506677.30	hypothetical_protein_conserved	1.06565	7.47e-07	3.54e-07	2.35e-06	5.90325	1	1	http://tritrypdb.org/gene/TcCLB.506677.30
TcCLB.511683.10	hypothetical_protein	1.06615	2.43e-05	8.5e-06	5.64e-05	5.35022	1	1	http://tritrypdb.org/gene/TcCLB.511683.10
TcCLB.503629.10	hypothetical_protein_conserved	1.06669	4.75e-08	2.97e-08	1.97e-07	6.85374	1	1	http://tritrypdb.org/gene/TcCLB.503629.10
TcCLB.507047.20	dispersed_gene_family_protein_1_(DGF-1_pseudogene)_putative	1.06712	3.68e-06	1.51e-06	1e-05	5.65886	1	1	http://tritrypdb.org/gene/TcCLB.507047.20
TcCLB.503697.30	hypothetical_protein_conserved	1.06768	1.49e-08	1.05e-08	6.99e-08	6.93057	1	1	http://tritrypdb.org/gene/TcCLB.503697.30
TcCLB.507625.110	chaperone_DNAJ_protein_putative	1.07075	3.52e-08	2.27e-08	1.51e-07	6.58912	1	1	http://tritrypdb.org/gene/TcCLB.507625.110
TcCLB.510243.54	hypothetical_protein_conserved	1.07081	8.6e-11	1.15e-10	7.63e-10	6.63167	1	1	http://tritrypdb.org/gene/TcCLB.510243.54
TcCLB.511553.140	mucin-associated_surface_protein_(MASP)_putative	1.07192	5.81e-07	2.82e-07	1.87e-06	4.17393	1	1	http://tritrypdb.org/gene/TcCLB.511553.140
TcCLB.507105.132	ATP-dependent_DEAD/H_RNA_helicase_(pseudogene)_putative	1.07278	6.55e-05	2.13e-05	0.00014168	5.2956	1	1	http://tritrypdb.org/gene/TcCLB.507105.132
TcCLB.508271.50	hypothetical_protein	1.07425	2.08e-10	2.45e-10	1.63e-09	6.65685	1	1	http://tritrypdb.org/gene/TcCLB.508271.50
TcCLB.509669.20	subtilisin-like_serine_peptidase_putativeserine_peptidase_clan_SB_family_S8-like_protein_putative	1.07448	2.01e-08	1.38e-08	9.15e-08	6.96365	1	1	http://tritrypdb.org/gene/TcCLB.509669.20
TcCLB.506887.40	hypothetical_protein_conserved	1.07492	5.68e-08	3.48e-08	2.31e-07	6.12582	1	1	http://tritrypdb.org/gene/TcCLB.506887.40
TcCLB.509151.110	hypothetical_protein_conserved	1.07582	3.46e-10	3.82e-10	2.53e-09	7.51406	1	1	http://tritrypdb.org/gene/TcCLB.509151.110
TcCLB.507641.130	hypothetical_protein_conserved	1.07724	1.13e-07	6.48e-08	4.3e-07	5.07998	1	1	http://tritrypdb.org/gene/TcCLB.507641.130
TcCLB.506609.93	trans-sialidase_(pseudogene)_putative	1.0787	0.0178288	0.00389492	0.0258613	1.49028	1	1	http://tritrypdb.org/gene/TcCLB.506609.93
TcCLB.482369.29	arginine_kinaseATP-guanidine_phosphotransferase	1.07911	9.31e-07	4.34e-07	2.88e-06	7.10449	1	1	http://tritrypdb.org/gene/TcCLB.482369.29
TcCLB.506605.160	histone_acetyltransferase_putative	1.0802	6.27e-10	6.49e-10	4.31e-09	7.11301	1	1	http://tritrypdb.org/gene/TcCLB.506605.160
TcCLB.506825.120	hypothetical_protein_conserved	1.08183	5.67e-12	1.13e-11	7.52e-11	9.19141	1	1	http://tritrypdb.org/gene/TcCLB.506825.120
TcCLB.509197.10	cation_transporter_putative	1.08196	1.83e-05	6.56e-06	4.35e-05	6.11631	1	1	http://tritrypdb.org/gene/TcCLB.509197.10
TcCLB.506113.50	ATP-dependent_DEAD/H_RNA_helicase_(pseudogene)_putative	1.08229	3.69e-06	1.51e-06	1.01e-05	5.71311	1	1	http://tritrypdb.org/gene/TcCLB.506113.50
TcCLB.507957.50	mucin_TcMUCII_putative	1.08594	1.57e-05	5.69e-06	3.78e-05	3.7869	1	1	http://tritrypdb.org/gene/TcCLB.507957.50
TcCLB.507211.20	protein_kinase_putative	1.08625	2.89e-06	1.21e-06	8.03e-06	6.21833	1	1	http://tritrypdb.org/gene/TcCLB.507211.20
TcCLB.507237.30	hypothetical_protein	1.09014	0.167518	0.0308151	0.204605	-0.514157	1	0	http://tritrypdb.org/gene/TcCLB.507237.30
TcCLB.509293.10	mucin_TcMUCII_putative	1.09129	1.17e-06	5.33e-07	3.54e-06	4.9226	1	1	http://tritrypdb.org/gene/TcCLB.509293.10
TcCLB.506795.20	hypothetical_protein_conserved	1.09221	3.09e-09	2.64e-09	1.75e-08	7.86227	1	1	http://tritrypdb.org/gene/TcCLB.506795.20
TcCLB.508265.110	hypothetical_protein_conserved	1.09505	5.96e-10	6.22e-10	4.13e-09	8.17188	1	1	http://tritrypdb.org/gene/TcCLB.508265.110
TcCLB.508347.140	hypothetical_protein_conserved	1.09564	7.9e-10	7.92e-10	5.26e-09	6.88176	1	1	http://tritrypdb.org/gene/TcCLB.508347.140
TcCLB.509669.170	hypothetical_protein_conserved	1.09753	8.74e-09	6.56e-09	4.35e-08	6.85039	1	1	http://tritrypdb.org/gene/TcCLB.509669.170
TcCLB.507677.20	hypothetical_protein_conserved	1.09758	7.15e-10	7.27e-10	4.83e-09	5.90604	1	1	http://tritrypdb.org/gene/TcCLB.507677.20
TcCLB.510287.20	dolicholphosphate-mannose_synthase_putative	1.09796	1.3e-09	1.23e-09	8.17e-09	6.34186	1	1	http://tritrypdb.org/gene/TcCLB.510287.20
TcCLB.511411.8	hypothetical_protein_conserved	1.09926	7.05e-10	7.18e-10	4.77e-09	7.07108	1	1	http://tritrypdb.org/gene/TcCLB.511411.8
TcCLB.510719.230	hypothetical_protein_conserved	1.09962	6.31e-11	8.72e-11	5.79e-10	6.92733	1	1	http://tritrypdb.org/gene/TcCLB.510719.230
TcCLB.510089.170	casein_kinase_I_putative	1.10151	2.85e-07	1.48e-07	9.82e-07	5.03628	1	1	http://tritrypdb.org/gene/TcCLB.510089.170
TcCLB.511683.20	hypothetical_protein_conserved	1.10359	5.82e-08	3.55e-08	2.36e-07	6.12398	1	1	http://tritrypdb.org/gene/TcCLB.511683.20
TcCLB.511409.70	hypothetical_protein_conserved	1.10669	7.83e-10	7.86e-10	5.22e-09	6.17618	1	1	http://tritrypdb.org/gene/TcCLB.511409.70
TcCLB.507899.10	retrotransposon_hot_spot_protein_(RHS_pseudogene)_putative	1.10759	7.23e-08	4.3e-08	2.86e-07	6.02839	1	1	http://tritrypdb.org/gene/TcCLB.507899.10
TcCLB.508041.10	S-phase_kinase-associated_protein_putativeSkp1_family_protein_putativecyclin_A/CDK2-associated_protein_putative	1.1081	8.1e-05	2.6e-05	0.000172575	4.23911	1	1	http://tritrypdb.org/gene/TcCLB.508041.10
TcCLB.506465.10	hypothetical_protein_conserved	1.10849	2.28e-09	2.01e-09	1.33e-08	6.17336	1	1	http://tritrypdb.org/gene/TcCLB.506465.10
TcCLB.506107.10	hypothetical_protein_conserved	1.11323	3.34e-07	1.7e-07	1.13e-06	6.64621	1	1	http://tritrypdb.org/gene/TcCLB.506107.10
TcCLB.511435.30	hypothetical_protein_conserved	1.11382	3.13e-11	4.75e-11	3.16e-10	7.5035	1	1	http://tritrypdb.org/gene/TcCLB.511435.30
TcCLB.511555.20	hypothetical_protein_conserved	1.11714	1.65e-10	2.02e-10	1.34e-09	6.02629	1	1	http://tritrypdb.org/gene/TcCLB.511555.20
TcCLB.510101.290	hypothetical_protein_conserved	1.11887	2.71e-11	4.21e-11	2.8e-10	8.35858	1	1	http://tritrypdb.org/gene/TcCLB.510101.290
TcCLB.506467.20	hypothetical_protein_conserved	1.11945	2.84e-11	4.36e-11	2.89e-10	6.43933	1	1	http://tritrypdb.org/gene/TcCLB.506467.20
TcCLB.511431.50	hypothetical_protein_conserved	1.12015	6.73e-12	1.31e-11	8.68e-11	7.0159	1	1	http://tritrypdb.org/gene/TcCLB.511431.50
TcCLB.511559.70	phospholipid_transporting_ATPase-like_protein_(pseudogene)_putative	1.12046	2.32e-08	1.57e-08	1.04e-07	6.6794	1	1	http://tritrypdb.org/gene/TcCLB.511559.70
TcCLB.508075.14	hypothetical_protein_conserved	1.12134	2.22e-07	1.18e-07	7.83e-07	6.43771	1	1	http://tritrypdb.org/gene/TcCLB.508075.14
TcCLB.507677.60	hypothetical_protein	1.12294	3.22e-11	4.87e-11	3.23e-10	6.69748	1	1	http://tritrypdb.org/gene/TcCLB.507677.60
TcCLB.508771.50	hypothetical_protein_conserved	1.12294	1.52e-09	1.41e-09	9.38e-09	6.48842	1	1	http://tritrypdb.org/gene/TcCLB.508771.50
TcCLB.506405.140	hypothetical_protein_conserved	1.12729	9.2e-08	5.35e-08	3.55e-07	7.33582	1	1	http://tritrypdb.org/gene/TcCLB.506405.140
TcCLB.510593.20	hypothetical_protein_conserved	1.12828	3.81e-10	4.16e-10	2.76e-09	6.48667	1	1	http://tritrypdb.org/gene/TcCLB.510593.20
TcCLB.511693.110	hypothetical_protein_conserved	1.12883	6.52e-08	3.93e-08	2.61e-07	6.32997	1	1	http://tritrypdb.org/gene/TcCLB.511693.110
TcCLB.510877.170	hypothetical_protein_conserved	1.12926	1.28e-08	9.19e-09	6.1e-08	6.82692	1	1	http://tritrypdb.org/gene/TcCLB.510877.170
TcCLB.508129.9	adenosine_monophosphate_deaminase_putative	1.12927	9.92e-10	9.65e-10	6.4e-09	6.9884	1	1	http://tritrypdb.org/gene/TcCLB.508129.9
TcCLB.511735.40	hypothetical_protein_conserved	1.12997	1.08e-07	6.19e-08	4.11e-07	6.09735	1	1	http://tritrypdb.org/gene/TcCLB.511735.40
TcCLB.422843.10	trans-sialidase_(pseudogene)_putative	1.13174	2.27e-07	1.2e-07	7.97e-07	5.7248	1	1	http://tritrypdb.org/gene/TcCLB.422843.10
TcCLB.506779.150	histone_H2B_variant_putative	1.1319	5.78e-08	3.53e-08	2.34e-07	7.90572	1	1	http://tritrypdb.org/gene/TcCLB.506779.150
TcCLB.503479.70	hypothetical_protein_conserved	1.13217	4.1e-07	2.05e-07	1.36e-06	7.88728	1	1	http://tritrypdb.org/gene/TcCLB.503479.70
TcCLB.404843.20	hypothetical_protein_conserved	1.1325	1.14e-09	1.1e-09	7.3e-09	7.86452	1	1	http://tritrypdb.org/gene/TcCLB.404843.20
TcCLB.508381.20	hypothetical_protein_conserved_(pseudogene)	1.13291	7.23e-07	3.44e-07	2.29e-06	7.06521	1	1	http://tritrypdb.org/gene/TcCLB.508381.20
TcCLB.507747.230	acid_phosphatase_type_5_putative	1.13493	2.14e-11	3.47e-11	2.31e-10	6.43146	1	1	http://tritrypdb.org/gene/TcCLB.507747.230
TcCLB.507257.60	fumarate_hydratase_putative	1.13573	1.34e-09	1.26e-09	8.39e-09	6.26396	1	1	http://tritrypdb.org/gene/TcCLB.507257.60
TcCLB.503841.70	aspartate_aminotransferase_putative	1.13796	0.000102964	3.25e-05	0.000215981	5.54017	1	1	http://tritrypdb.org/gene/TcCLB.503841.70
TcCLB.504213.70	hypothetical_protein_conserved	1.14161	3.32e-10	3.68e-10	2.44e-09	6.92876	1	1	http://tritrypdb.org/gene/TcCLB.504213.70
TcCLB.510407.100	hypothetical_protein_conserved	1.14439	4.56e-08	2.86e-08	1.9e-07	6.86704	1	1	http://tritrypdb.org/gene/TcCLB.510407.100
TcCLB.511689.19	hypothetical_protein_conserved	1.14662	8.54e-08	5.01e-08	3.33e-07	6.16062	1	1	http://tritrypdb.org/gene/TcCLB.511689.19
TcCLB.511753.50	hypothetical_protein_conserved	1.14669	1.1e-09	1.06e-09	7.04e-09	5.31869	1	1	http://tritrypdb.org/gene/TcCLB.511753.50
TcCLB.503865.20	hypothetical_protein_conserved	1.14714	9.36e-09	6.97e-09	4.63e-08	8.02209	1	1	http://tritrypdb.org/gene/TcCLB.503865.20
TcCLB.508671.10	serine_carboxypeptidase_(CBP1)_putative	1.14737	0.000161655	4.94e-05	0.000328299	7.80024	1	1	http://tritrypdb.org/gene/TcCLB.508671.10
TcCLB.510957.9	calpain-like_cysteine_peptidase_putative	1.14753	1.31e-08	9.37e-09	6.22e-08	8.05434	1	1	http://tritrypdb.org/gene/TcCLB.510957.9
TcCLB.506825.130	hypothetical_protein_conserved	1.14754	2e-11	3.29e-11	2.18e-10	7.06169	1	1	http://tritrypdb.org/gene/TcCLB.506825.130
TcCLB.511107.5	mucin_TcMUCII_putative	1.1517	7.57e-07	3.59e-07	2.38e-06	4.28776	1	1	http://tritrypdb.org/gene/TcCLB.511107.5
TcCLB.511537.30	hypothetical_protein_conserved	1.15202	1.92e-09	1.73e-09	1.15e-08	7.39911	1	1	http://tritrypdb.org/gene/TcCLB.511537.30
TcCLB.504033.140	hypothetical_protein_conserved_(pseudogene)	1.15224	4.76e-11	6.81e-11	4.52e-10	7.4489	1	1	http://tritrypdb.org/gene/TcCLB.504033.140
TcCLB.504427.190	hypothetical_protein_conserved	1.15304	1.91e-09	1.72e-09	1.14e-08	5.85896	1	1	http://tritrypdb.org/gene/TcCLB.504427.190
TcCLB.509595.20	hypothetical_protein_conserved	1.15342	0.123743	0.0233303	0.154908	-1.10418	1	0	http://tritrypdb.org/gene/TcCLB.509595.20
TcCLB.504557.50	dispersed_gene_family_protein_1_(DGF-1)_putative	1.15472	1.54e-07	8.53e-08	5.67e-07	6.13922	1	1	http://tritrypdb.org/gene/TcCLB.504557.50
TcCLB.510101.350	hypothetical_protein_conserved	1.15507	3.53e-10	3.89e-10	2.58e-09	9.17641	1	1	http://tritrypdb.org/gene/TcCLB.510101.350
TcCLB.510407.80	hypothetical_protein_conserved	1.15552	1.67e-10	2.03e-10	1.35e-09	7.72247	1	1	http://tritrypdb.org/gene/TcCLB.510407.80
TcCLB.507237.250	mucin-associated_surface_protein_(MASP_pseudogene)_putative	1.15652	1.02e-06	4.71e-07	3.13e-06	4.52134	1	1	http://tritrypdb.org/gene/TcCLB.507237.250
TcCLB.504427.100	hypothetical_protein_conserved	1.158	6.42e-08	3.87e-08	2.57e-07	5.72848	1	1	http://tritrypdb.org/gene/TcCLB.504427.100
TcCLB.450061.10	hypothetical_protein_conserved	1.16162	3.87e-08	2.47e-08	1.64e-07	7.33641	1	1	http://tritrypdb.org/gene/TcCLB.450061.10
TcCLB.511127.60	kinesin_putative	1.16197	2.73e-10	3.1e-10	2.06e-09	7.03228	1	1	http://tritrypdb.org/gene/TcCLB.511127.60
TcCLB.510409.20	hypothetical_protein_conserved_(pseudogene)hypothetical_protein_conserved_frameshift	1.16217	3.03e-09	2.6e-09	1.72e-08	5.66503	1	1	http://tritrypdb.org/gene/TcCLB.510409.20
TcCLB.511871.70	hypothetical_protein_conserved	1.16225	3.12e-08	2.04e-08	1.36e-07	5.82357	1	1	http://tritrypdb.org/gene/TcCLB.511871.70
TcCLB.511217.30	diacylglycerol_kinase_putative	1.16245	2.29e-10	2.67e-10	1.77e-09	6.19035	1	1	http://tritrypdb.org/gene/TcCLB.511217.30
TcCLB.511217.170	hypothetical_protein_conserved	1.16317	7.09e-08	4.23e-08	2.81e-07	5.83137	1	1	http://tritrypdb.org/gene/TcCLB.511217.170
TcCLB.506513.50	protein_kinase_putative	1.16647	2.17e-09	1.93e-09	1.28e-08	6.85586	1	1	http://tritrypdb.org/gene/TcCLB.506513.50
TcCLB.509871.10	retrotransposon_hot_spot_protein_(RHS_pseudogene)_putative	1.167	1.8e-10	2.17e-10	1.44e-09	7.13033	1	1	http://tritrypdb.org/gene/TcCLB.509871.10
TcCLB.510557.40	hypothetical_protein	1.17096	1.6e-09	1.47e-09	9.78e-09	5.01267	1	1	http://tritrypdb.org/gene/TcCLB.510557.40
TcCLB.510407.40	hypothetical_protein_conserved	1.17315	2.13e-11	3.46e-11	2.3e-10	6.92599	1	1	http://tritrypdb.org/gene/TcCLB.510407.40
TcCLB.506605.70	hypothetical_protein_conserved	1.17385	1.86e-10	2.23e-10	1.48e-09	7.55665	1	1	http://tritrypdb.org/gene/TcCLB.506605.70
TcCLB.509011.30	hypothetical_protein	1.17545	8.49e-10	8.44e-10	5.61e-09	6.30183	1	1	http://tritrypdb.org/gene/TcCLB.509011.30
TcCLB.509153.20	hypothetical_protein_conserved	1.17815	2.3e-05	8.09e-06	5.37e-05	4.84345	1	1	http://tritrypdb.org/gene/TcCLB.509153.20
TcCLB.505007.30	hypothetical_protein_conserved	1.17861	6.73e-08	4.04e-08	2.68e-07	5.77162	1	1	http://tritrypdb.org/gene/TcCLB.505007.30
TcCLB.511473.9	N-acetyltransferase_complex_ARD1_subunit_(pseudogene)_putative	1.17895	5.47e-07	2.67e-07	1.77e-06	5.45593	1	1	http://tritrypdb.org/gene/TcCLB.511473.9
TcCLB.508357.80	cation_transporter_protein_putative	1.17908	2.69e-09	2.34e-09	1.55e-08	6.682	1	1	http://tritrypdb.org/gene/TcCLB.508357.80
TcCLB.504127.30	trans-sialidase_(pseudogene)_putative	1.17984	3.69e-07	1.87e-07	1.24e-06	3.88976	1	1	http://tritrypdb.org/gene/TcCLB.504127.30
TcCLB.507875.159	60S_acidic_ribosomal_protein_P2_(pseudogene)_putative	1.17992	1.7e-07	9.31e-08	6.18e-07	8.66536	1	1	http://tritrypdb.org/gene/TcCLB.507875.159
TcCLB.506609.50	hypothetical_protein	1.18103	0.000105365	3.32e-05	0.00022053	3.49155	1	1	http://tritrypdb.org/gene/TcCLB.506609.50
TcCLB.510533.170	hypothetical_protein_conserved	1.18257	2.97e-10	3.33e-10	2.21e-09	5.46489	1	1	http://tritrypdb.org/gene/TcCLB.510533.170
TcCLB.503401.20	hypothetical_protein_conserved	1.18328	3.99e-08	2.54e-08	1.69e-07	5.4242	1	1	http://tritrypdb.org/gene/TcCLB.503401.20
TcCLB.506779.110	phopshatase_putative	1.18547	1.38e-10	1.73e-10	1.15e-09	6.94489	1	1	http://tritrypdb.org/gene/TcCLB.506779.110
TcCLB.504427.120	hypothetical_protein_conserved	1.19001	1.44e-07	8e-08	5.31e-07	5.77188	1	1	http://tritrypdb.org/gene/TcCLB.504427.120
TcCLB.503767.20	hypothetical_protein	1.1931	0.00330908	0.000810581	0.00538207	3.28974	1	1	http://tritrypdb.org/gene/TcCLB.503767.20
TcCLB.508723.50	hypothetical_protein_conserved	1.19384	4.98e-09	4e-09	2.66e-08	6.31675	1	1	http://tritrypdb.org/gene/TcCLB.508723.50
TcCLB.506251.100	hypothetical_protein_conserved	1.1942	5.39e-07	2.64e-07	1.75e-06	6.31458	1	1	http://tritrypdb.org/gene/TcCLB.506251.100
TcCLB.506825.70	serine-threonine_dehydratase_putative;with=GeneDB:LmjF06.0730	1.19514	1.03e-09	9.97e-10	6.62e-09	5.27183	1	1	http://tritrypdb.org/gene/TcCLB.506825.70
TcCLB.506825.100	hypothetical_protein_conserved	1.19898	1.62e-10	1.98e-10	1.32e-09	7.64168	1	1	http://tritrypdb.org/gene/TcCLB.506825.100
TcCLB.508265.60	hypothetical_protein_conserved_(pseudogene)	1.19937	6.23e-12	1.22e-11	8.11e-11	7.1768	1	1	http://tritrypdb.org/gene/TcCLB.508265.60
TcCLB.508209.94	hypothetical_protein	1.20151	1.19e-08	8.63e-09	5.73e-08	6.18068	1	1	http://tritrypdb.org/gene/TcCLB.508209.94
TcCLB.506729.40	hypothetical_protein_conserved	1.20171	2.82e-11	4.34e-11	2.88e-10	8.30603	1	1	http://tritrypdb.org/gene/TcCLB.506729.40
TcCLB.510297.40	hypothetical_protein	1.20288	3.72e-07	1.88e-07	1.25e-06	4.47007	1	1	http://tritrypdb.org/gene/TcCLB.510297.40
TcCLB.511435.40	hypothetical_protein_conserved	1.20671	9.87e-12	1.81e-11	1.2e-10	6.57947	1	1	http://tritrypdb.org/gene/TcCLB.511435.40
TcCLB.511171.60	surface_protease_GP63_(pseudogene)_putative	1.20836	0.00126593	0.000332421	0.0022072	2.88726	1	1	http://tritrypdb.org/gene/TcCLB.511171.60
TcCLB.503579.80	hypothetical_protein_conserved	1.20989	7.11e-12	1.38e-11	9.16e-11	6.79843	1	1	http://tritrypdb.org/gene/TcCLB.503579.80
TcCLB.511173.140	hypothetical_protein	1.21029	0.000264564	7.79e-05	0.000517505	3.25625	1	1	http://tritrypdb.org/gene/TcCLB.511173.140
TcCLB.511535.10	hypothetical_protein_conserved	1.21085	0.0778003	0.0152069	0.100971	-0.963995	1	0	http://tritrypdb.org/gene/TcCLB.511535.10
TcCLB.510753.30	hypothetical_protein_conserved	1.21287	6.7e-08	4.03e-08	2.68e-07	5.61193	1	1	http://tritrypdb.org/gene/TcCLB.510753.30
TcCLB.507875.40	trans-sialidase_(pseudogene)_putative	1.21912	7.95e-09	6.04e-09	4.01e-08	5.63161	1	1	http://tritrypdb.org/gene/TcCLB.507875.40
TcCLB.510719.130	hypothetical_protein_conserved	1.2192	5.06e-11	7.19e-11	4.78e-10	6.34051	1	1	http://tritrypdb.org/gene/TcCLB.510719.130
TcCLB.504151.30	hypothetical_protein_conserved	1.21987	3.46e-10	3.82e-10	2.53e-09	6.03171	1	1	http://tritrypdb.org/gene/TcCLB.504151.30
TcCLB.506859.180	hypothetical_protein_conserved	1.22056	2.16e-06	9.29e-07	6.17e-06	7.49449	1	1	http://tritrypdb.org/gene/TcCLB.506859.180
TcCLB.506649.40	rho-like_GTP_binding_protein_putative	1.2223	2.03e-11	3.32e-11	2.21e-10	6.78967	1	1	http://tritrypdb.org/gene/TcCLB.506649.40
TcCLB.506529.480	hypothetical_protein_conserved	1.22253	1.62e-09	1.49e-09	9.91e-09	6.71795	1	1	http://tritrypdb.org/gene/TcCLB.506529.480
TcCLB.504149.90	hypothetical_protein_conserved	1.223	1.52e-11	2.6e-11	1.73e-10	8.1212	1	1	http://tritrypdb.org/gene/TcCLB.504149.90
TcCLB.509011.70	adrenodoxin_precursor_putative	1.22497	1.34e-10	1.69e-10	1.12e-09	6.53645	1	1	http://tritrypdb.org/gene/TcCLB.509011.70
TcCLB.510297.10	hypothetical_protein_conserved	1.23007	0.117958	0.0223251	0.148234	0.3705	1	0	http://tritrypdb.org/gene/TcCLB.510297.10
TcCLB.506953.30	protein_kinase_putative	1.23323	3.11e-09	2.66e-09	1.76e-08	6.04447	1	1	http://tritrypdb.org/gene/TcCLB.506953.30
TcCLB.508515.170	retrotransposon_hot_spot_protein_(RHS_pseudogene)_putative	1.2336	1.61e-08	1.13e-08	7.51e-08	6.92424	1	1	http://tritrypdb.org/gene/TcCLB.508515.170
TcCLB.506773.100	protein_kinase_putative	1.23363	1.21e-10	1.55e-10	1.03e-09	6.48983	1	1	http://tritrypdb.org/gene/TcCLB.506773.100
TcCLB.507975.50	trans-sialidase_(pseudogene)_putative	1.23569	2.97e-13	9.66e-13	6.41e-12	8.4335	1	1	http://tritrypdb.org/gene/TcCLB.507975.50
TcCLB.510755.19	hypothetical_protein_conserved	1.2395	4.52e-09	3.69e-09	2.45e-08	5.92638	1	1	http://tritrypdb.org/gene/TcCLB.510755.19
TcCLB.510279.240	hypothetical_protein	1.24197	1.13e-06	5.14e-07	3.42e-06	4.50026	1	1	http://tritrypdb.org/gene/TcCLB.510279.240
TcCLB.504213.60	hypothetical_protein_conserved	1.24316	7.3e-12	1.41e-11	9.35e-11	7.133	1	1	http://tritrypdb.org/gene/TcCLB.504213.60
TcCLB.438923.10	hypothetical_protein	1.24322	4.31e-09	3.53e-09	2.34e-08	7.59523	1	1	http://tritrypdb.org/gene/TcCLB.438923.10
TcCLB.506649.4	hypothetical_protein_conserved	1.24353	1.14e-06	5.23e-07	3.47e-06	5.34684	1	1	http://tritrypdb.org/gene/TcCLB.506649.4
TcCLB.511001.50	hypothetical_protein_conserved	1.2439	7.21e-11	9.86e-11	6.55e-10	5.85531	1	1	http://tritrypdb.org/gene/TcCLB.511001.50
TcCLB.511693.130	hypothetical_protein	1.24639	6.89e-09	5.3e-09	3.52e-08	5.71312	1	1	http://tritrypdb.org/gene/TcCLB.511693.130
TcCLB.510611.10	hypothetical_protein_conserved	1.24962	2.18e-11	3.54e-11	2.35e-10	6.44196	1	1	http://tritrypdb.org/gene/TcCLB.510611.10
TcCLB.507395.40	hypothetical_protein	1.25016	0.0117713	0.00264537	0.0175646	2.05184	1	1	http://tritrypdb.org/gene/TcCLB.507395.40
TcCLB.511131.89	hypothetical_protein_conserved	1.25211	3.22e-11	4.87e-11	3.23e-10	6.21264	1	1	http://tritrypdb.org/gene/TcCLB.511131.89
TcCLB.504073.20	hypothetical_protein_conserved	1.25271	1.09e-08	7.96e-09	5.28e-08	6.20082	1	1	http://tritrypdb.org/gene/TcCLB.504073.20
TcCLB.509139.20	hypothetical_protein_conserved	1.25279	4.52e-07	2.24e-07	1.49e-06	5.34889	1	1	http://tritrypdb.org/gene/TcCLB.509139.20
TcCLB.511587.40	hypothetical_protein_conserved_(pseudogene)	1.25286	1.49e-09	1.39e-09	9.2e-09	7.94009	1	1	http://tritrypdb.org/gene/TcCLB.511587.40
TcCLB.511433.10	hypothetical_protein_conserved	1.25379	1.81e-09	1.64e-09	1.09e-08	5.54327	1	1	http://tritrypdb.org/gene/TcCLB.511433.10
TcCLB.503401.29	hypothetical_protein_conserved	1.2561	3.68e-09	3.08e-09	2.05e-08	5.33632	1	1	http://tritrypdb.org/gene/TcCLB.503401.29
TcCLB.510101.450	hypothetical_protein_conserved	1.25686	5.09e-11	7.23e-11	4.8e-10	7.07263	1	1	http://tritrypdb.org/gene/TcCLB.510101.450
TcCLB.506529.280	hypothetical_protein_conserved	1.25832	1.49e-09	1.39e-09	9.2e-09	6.39777	1	1	http://tritrypdb.org/gene/TcCLB.506529.280
TcCLB.507507.20	ADP-ribosylation_factor_GTPase_activating_protein_1_putative	1.25915	3.09e-12	6.84e-12	4.54e-11	7.14256	1	1	http://tritrypdb.org/gene/TcCLB.507507.20
TcCLB.506943.150	hypothetical_protein_conserved_(pseudogene)	1.26134	6e-10	6.25e-10	4.15e-09	6.33865	1	1	http://tritrypdb.org/gene/TcCLB.506943.150
TcCLB.506925.170	hypothetical_protein_conserved	1.26395	0.0130033	0.00289991	0.0192547	2.37821	1	1	http://tritrypdb.org/gene/TcCLB.506925.170
TcCLB.506563.160	hypothetical_protein_conserved	1.26456	2.51e-12	5.77e-12	3.83e-11	8.35532	1	1	http://tritrypdb.org/gene/TcCLB.506563.160
TcCLB.508927.10	hypothetical_protein_conserved	1.26562	6.88e-08	4.12e-08	2.74e-07	4.93002	1	1	http://tritrypdb.org/gene/TcCLB.508927.10
TcCLB.507875.10	hypothetical_protein_conserved	1.26754	3.05e-07	1.57e-07	1.04e-06	7.67654	1	1	http://tritrypdb.org/gene/TcCLB.507875.10
TcCLB.510053.30	hypothetical_protein_conserved	1.26819	1.24e-08	8.89e-09	5.91e-08	6.87159	1	1	http://tritrypdb.org/gene/TcCLB.510053.30
TcCLB.506351.90	surface_protease_GP63_putative	1.27432	3.2e-08	2.09e-08	1.39e-07	7.103	1	1	http://tritrypdb.org/gene/TcCLB.506351.90
TcCLB.509927.10	trans-sialidase_putative	1.27574	1.63e-09	1.49e-09	9.91e-09	7.17631	1	1	http://tritrypdb.org/gene/TcCLB.509927.10
TcCLB.504239.90	hypothetical_protein_conserved	1.27891	0.0125065	0.00279703	0.0185716	1.88948	1	1	http://tritrypdb.org/gene/TcCLB.504239.90
TcCLB.507511.60	hypothetical_protein	1.27892	0.0327429	0.0068658	0.0455873	1.50259	1	1	http://tritrypdb.org/gene/TcCLB.507511.60
TcCLB.506931.60	hypothetical_protein	1.27903	4.09e-09	3.37e-09	2.24e-08	5.36332	1	1	http://tritrypdb.org/gene/TcCLB.506931.60
TcCLB.504149.175	hypothetical_protein_conserved	1.27957	1.15e-10	1.48e-10	9.83e-10	7.6214	1	1	http://tritrypdb.org/gene/TcCLB.504149.175
TcCLB.508837.34	dispersed_gene_family_protein_1_(DGF-1)_putative	1.27982	2.34e-08	1.58e-08	1.05e-07	6.79142	1	1	http://tritrypdb.org/gene/TcCLB.508837.34
TcCLB.506825.180	protein_kinase_putative	1.27992	8.17e-13	2.23e-12	1.48e-11	8.59895	1	1	http://tritrypdb.org/gene/TcCLB.506825.180
TcCLB.504643.30	ubiquitin_carrier_protein_4_putative	1.28136	1.03e-07	5.95e-08	3.95e-07	7.03144	1	1	http://tritrypdb.org/gene/TcCLB.504643.30
TcCLB.504427.231	no_Fct	1.28139	0.119492	0.0225964	0.150035	-1.79541	1	0	http://tritrypdb.org/gene/TcCLB.504427.231
TcCLB.504153.50	no_Fct	1.28276	0.00392631	0.000950254	0.00630947	10.5018	1	1	http://tritrypdb.org/gene/TcCLB.504153.50
TcCLB.509959.10	retrotransposon_hot_spot_protein_(RHS_pseudogene)_putative	1.28399	9.66e-07	4.48e-07	2.98e-06	5.26377	1	1	http://tritrypdb.org/gene/TcCLB.509959.10
TcCLB.508107.20	trans-sialidase_(pseudogene)_putative	1.28899	0.0194267	0.00421256	0.0279704	1.70371	1	1	http://tritrypdb.org/gene/TcCLB.508107.20
TcCLB.508165.341	elongation_factor_1-gamma_(EF-1-gamma_pseudogene)_putative	1.29049	0.0492441	0.00998832	0.0663201	1.97933	1	0	http://tritrypdb.org/gene/TcCLB.508165.341
TcCLB.509775.20	protein_kinase_putative	1.29078	1.29e-08	9.25e-09	6.14e-08	7.87181	1	1	http://tritrypdb.org/gene/TcCLB.509775.20
TcCLB.507475.30	retrotransposon_hot_spot_protein_(RHS_pseudogene)_putative	1.29329	5.7e-12	1.14e-11	7.55e-11	7.23024	1	1	http://tritrypdb.org/gene/TcCLB.507475.30
TcCLB.503513.20	hypothetical_protein	1.29572	1.67e-12	4.11e-12	2.73e-11	7.66955	1	1	http://tritrypdb.org/gene/TcCLB.503513.20
TcCLB.506885.280	NIMA-related_kinase_putative	1.30068	1.69e-07	9.27e-08	6.16e-07	3.88751	1	1	http://tritrypdb.org/gene/TcCLB.506885.280
TcCLB.509267.110	hypothetical_protein_conserved	1.30089	5.12e-08	3.17e-08	2.1e-07	6.72374	1	1	http://tritrypdb.org/gene/TcCLB.509267.110
TcCLB.511603.343	hypothetical_protein_conserved_(pseudogene)	1.30099	0.0742196	0.0145558	0.0966472	1.10067	1	0	http://tritrypdb.org/gene/TcCLB.511603.343
TcCLB.511751.140	hypothetical_protein	1.30133	2.9e-10	3.26e-10	2.16e-09	5.6214	1	1	http://tritrypdb.org/gene/TcCLB.511751.140
TcCLB.510525.70	hypothetical_protein_conserved	1.30222	3.57e-10	3.93e-10	2.61e-09	6.47764	1	1	http://tritrypdb.org/gene/TcCLB.510525.70
TcCLB.507107.30	UDP-Gal_or_UDP-GlcNAc-dependent_glycosyltransferase_putative	1.30307	8.96e-10	8.85e-10	5.87e-09	5.02918	1	1	http://tritrypdb.org/gene/TcCLB.507107.30
TcCLB.510533.210	hypothetical_protein_conserved_(pseudogene)	1.30339	0.000110672	3.47e-05	0.000230716	6.68982	1	1	http://tritrypdb.org/gene/TcCLB.510533.210
TcCLB.511417.50	hypothetical_protein	1.30871	4.95e-09	3.98e-09	2.64e-08	5.44269	1	1	http://tritrypdb.org/gene/TcCLB.511417.50
TcCLB.503697.120	hypothetical_protein_conserved	1.3103	1.26e-09	1.19e-09	7.92e-09	6.97695	1	1	http://tritrypdb.org/gene/TcCLB.503697.120
TcCLB.508835.30	trans-sialidase_(pseudogene)_putative	1.31073	2.4e-12	5.6e-12	3.72e-11	6.19141	1	1	http://tritrypdb.org/gene/TcCLB.508835.30
TcCLB.510025.20	mucin_TcMUCII_putative	1.31755	0.00263313	0.000655498	0.00435235	2.30539	1	1	http://tritrypdb.org/gene/TcCLB.510025.20
TcCLB.506227.100	hypothetical_protein_conserved	1.31892	1.09e-06	5e-07	3.32e-06	4.66547	1	1	http://tritrypdb.org/gene/TcCLB.506227.100
TcCLB.510307.140	retrotransposon_hot_spot_protein_(RHS_pseudogene)_putative	1.3201	2.17e-09	1.93e-09	1.28e-08	6.21618	1	1	http://tritrypdb.org/gene/TcCLB.510307.140
TcCLB.506591.120	receptor-type_adenylate_cyclase_(pseudogene)_putativereceptor-type_adenylate_cyclase_putative_degenerate	1.32062	2.7e-09	2.34e-09	1.55e-08	6.66118	1	1	http://tritrypdb.org/gene/TcCLB.506591.120
TcCLB.506657.88	hypothetical_protein_conserved	1.32213	0.000873961	0.00023566	0.00156473	4.22353	1	1	http://tritrypdb.org/gene/TcCLB.506657.88
TcCLB.506635.10	hypothetical_protein_(pseudogene)	1.32434	1.27e-08	9.07e-09	6.02e-08	6.59192	1	1	http://tritrypdb.org/gene/TcCLB.506635.10
TcCLB.509245.20	hypothetical_protein_conserved	1.326	4.55e-06	1.83e-06	1.21e-05	4.12409	1	1	http://tritrypdb.org/gene/TcCLB.509245.20
TcCLB.506147.17	no_Fct	1.32729	0.000490167	0.000138251	0.000917956	2.59495	1	1	http://tritrypdb.org/gene/TcCLB.506147.17
TcCLB.504427.10	trypanothione_synthetase_putative	1.32802	3.57e-06	1.47e-06	9.79e-06	4.78107	1	1	http://tritrypdb.org/gene/TcCLB.504427.10
TcCLB.507639.90	hypothetical_protein_conserved	1.32873	2.24e-06	9.58e-07	6.36e-06	5.40902	1	1	http://tritrypdb.org/gene/TcCLB.507639.90
TcCLB.504117.50	hypothetical_protein_conserved_(pseudogene)	1.32903	0.0108113	0.00244708	0.0162481	3.44154	1	1	http://tritrypdb.org/gene/TcCLB.504117.50
TcCLB.510251.19	hypothetical_protein_conserved	1.32981	5.08e-10	5.41e-10	3.59e-09	6.46529	1	1	http://tritrypdb.org/gene/TcCLB.510251.19
TcCLB.503409.10	hypothetical_protein_conserved	1.33013	5.93e-09	4.65e-09	3.09e-08	5.63448	1	1	http://tritrypdb.org/gene/TcCLB.503409.10
TcCLB.510739.60	no_Fct	1.33092	0.0511213	0.0103371	0.0686363	0.98603	1	0	http://tritrypdb.org/gene/TcCLB.510739.60
TcCLB.506221.70	hypothetical_protein_conserved	1.33662	1.93e-10	2.3e-10	1.53e-09	5.83418	1	1	http://tritrypdb.org/gene/TcCLB.506221.70
TcCLB.504167.20	mucin_TcMUCI_putative	1.3372	2.3e-06	9.81e-07	6.51e-06	5.46975	1	1	http://tritrypdb.org/gene/TcCLB.504167.20
TcCLB.429257.20	fatty_acid_desaturase_putative	1.33879	3.31e-08	2.15e-08	1.43e-07	7.86234	1	1	http://tritrypdb.org/gene/TcCLB.429257.20
TcCLB.510017.30	mucin-associated_surface_protein_(MASP_pseudogene)_putative	1.33928	0.000198872	5.98e-05	0.000397146	2.96981	1	1	http://tritrypdb.org/gene/TcCLB.510017.30
TcCLB.509581.5	retrotransposon_hot_spot_(RHS)_protein_putative	1.33976	3.76e-08	2.41e-08	1.6e-07	5.93282	1	1	http://tritrypdb.org/gene/TcCLB.509581.5
TcCLB.506775.130	hypothetical_protein_conserved	1.3401	1.58e-12	3.91e-12	2.6e-11	7.75455	1	1	http://tritrypdb.org/gene/TcCLB.506775.130
TcCLB.504029.70	hypothetical_protein_conserved	1.34473	4.89e-13	1.45e-12	9.64e-12	7.07545	1	1	http://tritrypdb.org/gene/TcCLB.504029.70
TcCLB.506737.20	protein_kinase_putative	1.34679	2.77e-10	3.13e-10	2.08e-09	7.05041	1	1	http://tritrypdb.org/gene/TcCLB.506737.20
TcCLB.508687.11	trans-sialidase_(pseudogene)_putative	1.34869	0.00274476	0.000681887	0.00452757	2.2305	1	1	http://tritrypdb.org/gene/TcCLB.508687.11
TcCLB.511331.10	calpain_cysteine_peptidase_putative	1.34918	0.00490029	0.00117016	0.00776962	2.64996	1	1	http://tritrypdb.org/gene/TcCLB.511331.10
TcCLB.506375.25	no_Fct	1.34937	0.000230165	6.85e-05	0.000454723	3.81313	1	1	http://tritrypdb.org/gene/TcCLB.506375.25
TcCLB.509169.20	hypothetical_protein_conserved	1.35108	1.14e-11	2.04e-11	1.35e-10	6.5765	1	1	http://tritrypdb.org/gene/TcCLB.509169.20
TcCLB.507145.79	mucin_TcMUCII_putative	1.35288	0.000423214	0.000120646	0.00080106	3.36519	1	1	http://tritrypdb.org/gene/TcCLB.507145.79
TcCLB.430895.10	hypothetical_protein_conserved	1.35385	3.71e-09	3.1e-09	2.06e-08	5.43514	1	1	http://tritrypdb.org/gene/TcCLB.430895.10
TcCLB.509669.30	ABC_transporter_putative	1.36354	6.88e-10	7.04e-10	4.68e-09	5.7219	1	1	http://tritrypdb.org/gene/TcCLB.509669.30
TcCLB.508777.40	leucine-rich_repeat_protein_putative	1.36449	1.43e-10	1.78e-10	1.18e-09	7.41629	1	1	http://tritrypdb.org/gene/TcCLB.508777.40
TcCLB.509889.9	dispersed_gene_family_protein_1_(DGF-1)_putative	1.36498	1.11e-09	1.07e-09	7.1e-09	5.64845	1	1	http://tritrypdb.org/gene/TcCLB.509889.9
TcCLB.510275.405	hypothetical_protein	1.36774	3e-09	2.57e-09	1.71e-08	5.91782	1	1	http://tritrypdb.org/gene/TcCLB.510275.405
TcCLB.506635.110	kinesin-like_protein_putative	1.37054	6.82e-11	9.38e-11	6.23e-10	6.19609	1	1	http://tritrypdb.org/gene/TcCLB.506635.110
TcCLB.510525.139	protein_kinase_putative	1.37238	2.66e-10	3.03e-10	2.01e-09	4.72059	1	1	http://tritrypdb.org/gene/TcCLB.510525.139
TcCLB.503985.10	trans-sialidase_(pseudogene)_putative	1.37477	4.55e-07	2.26e-07	1.5e-06	4.72093	1	1	http://tritrypdb.org/gene/TcCLB.503985.10
TcCLB.506565.4	RNA-binding_protein_putative	1.37875	3.89e-05	1.31e-05	8.71e-05	4.62051	1	1	http://tritrypdb.org/gene/TcCLB.506565.4
TcCLB.510227.20	hypothetical_protein	1.379	1.98e-10	2.36e-10	1.57e-09	5.43544	1	1	http://tritrypdb.org/gene/TcCLB.510227.20
TcCLB.507559.60	hypothetical_protein_conserved	1.38236	1.81e-13	6.41e-13	4.25e-12	6.88926	1	1	http://tritrypdb.org/gene/TcCLB.507559.60
TcCLB.506501.90	hypothetical_protein	1.3842	0.0164571	0.0036169	0.0240154	0.993244	1	1	http://tritrypdb.org/gene/TcCLB.506501.90
TcCLB.510407.70	hypothetical_protein	1.38691	5.9e-12	1.16e-11	7.72e-11	6.08314	1	1	http://tritrypdb.org/gene/TcCLB.510407.70
TcCLB.506825.230	hypothetical_protein_conserved	1.39167	7.73e-14	3.2e-13	2.12e-12	7.74768	1	1	http://tritrypdb.org/gene/TcCLB.506825.230
TcCLB.456097.10	hypothetical_protein	1.39327	0.113698	0.0216071	0.143466	0.429449	1	0	http://tritrypdb.org/gene/TcCLB.456097.10
TcCLB.511683.30	hypothetical_protein_conserved	1.3939	2.78e-12	6.3e-12	4.18e-11	7.01429	1	1	http://tritrypdb.org/gene/TcCLB.511683.30
TcCLB.506165.4	hypothetical_protein_conserved	1.40152	6.5e-07	3.13e-07	2.08e-06	5.57256	1	1	http://tritrypdb.org/gene/TcCLB.506165.4
TcCLB.507229.25	trans-sialidase_(pseudogene)_putative	1.40212	1.63e-09	1.49e-09	9.91e-09	5.22016	1	1	http://tritrypdb.org/gene/TcCLB.507229.25
TcCLB.507941.70	hypothetical_protein_conserved	1.4086	4.03e-12	8.51e-12	5.65e-11	6.84854	1	1	http://tritrypdb.org/gene/TcCLB.507941.70
TcCLB.433033.10	retrotransposon_hot_spot_protein_(RHS_pseudogene)_putative	1.40994	3.34e-09	2.82e-09	1.87e-08	6.00409	1	1	http://tritrypdb.org/gene/TcCLB.433033.10
TcCLB.511401.95	hypothetical_protein_(pseudogene)	1.41173	6.18e-07	2.99e-07	1.98e-06	4.69972	1	1	http://tritrypdb.org/gene/TcCLB.511401.95
TcCLB.511121.11	retrotransposon_hot_spot_(RHS)_protein_putative	1.41332	4.21e-08	2.67e-08	1.77e-07	6.23051	1	1	http://tritrypdb.org/gene/TcCLB.511121.11
TcCLB.510077.40	small_GTP-binding_protein_RAB6_putative	1.41347	4.59e-08	2.88e-08	1.91e-07	5.93816	1	1	http://tritrypdb.org/gene/TcCLB.510077.40
TcCLB.506777.110	hypothetical_protein_conserved	1.41539	2.37e-12	5.56e-12	3.69e-11	7.95452	1	1	http://tritrypdb.org/gene/TcCLB.506777.110
TcCLB.508163.30	hypothetical_protein	1.41668	0.0301933	0.00636166	0.04224	1.07216	1	1	http://tritrypdb.org/gene/TcCLB.508163.30
TcCLB.483813.10	trans-sialidase_putative	1.41766	0.0202409	0.00437829	0.0290708	0.987275	1	1	http://tritrypdb.org/gene/TcCLB.483813.10
TcCLB.485845.9	dispersed_gene_family_protein_1_(DGF-1)_putative	1.41899	0.00515609	0.00122771	0.00815173	2.88529	1	1	http://tritrypdb.org/gene/TcCLB.485845.9
TcCLB.508807.5	glycosylphosphatidylinositol-specific_phospholipase_C	1.42271	1.37e-08	9.72e-09	6.45e-08	6.02187	1	1	http://tritrypdb.org/gene/TcCLB.508807.5
TcCLB.506525.70	hypothetical_protein_conserved	1.42369	1.3e-10	1.65e-10	1.09e-09	7.39539	1	1	http://tritrypdb.org/gene/TcCLB.506525.70
TcCLB.509151.90	hypothetical_protein_conserved	1.42495	3.36e-13	1.06e-12	7.04e-12	7.05753	1	1	http://tritrypdb.org/gene/TcCLB.509151.90
TcCLB.506649.60	hypothetical_protein_conserved	1.42595	6.75e-13	1.9e-12	1.26e-11	7.10979	1	1	http://tritrypdb.org/gene/TcCLB.506649.60
TcCLB.506667.20	hypothetical_protein	1.42602	0.00056148	0.000156793	0.00104107	2.72421	1	1	http://tritrypdb.org/gene/TcCLB.506667.20
TcCLB.506775.160	hypothetical_protein_conserved	1.42793	5.57e-12	1.12e-11	7.41e-11	6.31853	1	1	http://tritrypdb.org/gene/TcCLB.506775.160
TcCLB.506633.80	hypothetical_protein_conserved	1.42908	1.39e-05	5.09e-06	3.38e-05	7.89018	1	1	http://tritrypdb.org/gene/TcCLB.506633.80
TcCLB.506605.220	hypothetical_protein_conserved	1.42921	1.98e-11	3.25e-11	2.16e-10	6.46754	1	1	http://tritrypdb.org/gene/TcCLB.506605.220
TcCLB.509891.70	hypothetical_protein_conserved_(pseudogene)	1.4296	1.37e-07	7.66e-08	5.08e-07	8.32582	1	1	http://tritrypdb.org/gene/TcCLB.509891.70
TcCLB.507975.70	retrotransposon_hot_spot_protein_(RHS_pseudogene)_putative	1.43141	2.8e-13	9.31e-13	6.18e-12	6.82852	1	1	http://tritrypdb.org/gene/TcCLB.507975.70
TcCLB.503441.10	retrotransposon_hot_spot_protein_(RHS_pseudogene)_putative	1.4369	3.13e-09	2.67e-09	1.77e-08	6.47299	1	1	http://tritrypdb.org/gene/TcCLB.503441.10
TcCLB.506147.18	no_Fct	1.44001	1.42e-05	5.2e-06	3.46e-05	3.08506	1	1	http://tritrypdb.org/gene/TcCLB.506147.18
TcCLB.506795.10	RNA-binding_protein_putative	1.44098	0.0125266	0.00280112	0.0185988	0.124887	1	1	http://tritrypdb.org/gene/TcCLB.506795.10
TcCLB.510061.11	mucin-associated_surface_protein_(MASP)_putative	1.4472	3.6e-07	1.83e-07	1.21e-06	3.62469	1	1	http://tritrypdb.org/gene/TcCLB.510061.11
TcCLB.506375.35	hypothetical_protein	1.45758	2.93e-05	1.01e-05	6.71e-05	3.84782	1	1	http://tritrypdb.org/gene/TcCLB.506375.35
TcCLB.506761.11	mucin-associated_surface_protein_(MASP)_putative	1.46227	0.00538758	0.00127839	0.00848822	2.01979	1	1	http://tritrypdb.org/gene/TcCLB.506761.11
TcCLB.508385.30	CYC2-like_cyclin_putative	1.46392	3.23e-10	3.6e-10	2.39e-09	7.0873	1	1	http://tritrypdb.org/gene/TcCLB.508385.30
TcCLB.504149.220	retrotransposon_hot_spot_protein_(RHS_pseudogene)_putative	1.46398	5.11e-10	5.44e-10	3.61e-09	6.67084	1	1	http://tritrypdb.org/gene/TcCLB.504149.220
TcCLB.504427.140	hypothetical_protein_conserved	1.46622	1.04e-12	2.74e-12	1.82e-11	7.30255	1	1	http://tritrypdb.org/gene/TcCLB.504427.140
TcCLB.507993.110	hypothetical_protein_conserved	1.46704	7.89e-09	6e-09	3.98e-08	6.82168	1	1	http://tritrypdb.org/gene/TcCLB.507993.110
TcCLB.510029.90	hypothetical_protein_conserved	1.46782	2.12e-10	2.49e-10	1.65e-09	7.04286	1	1	http://tritrypdb.org/gene/TcCLB.510029.90
TcCLB.507711.100	procyclic_form_surface_glycoprotein_putative	1.46954	1.72e-10	2.09e-10	1.39e-09	7.82072	1	1	http://tritrypdb.org/gene/TcCLB.507711.100
TcCLB.503627.20	protein_kinase_putative	1.46964	3.14e-13	1.01e-12	6.67e-12	7.72022	1	1	http://tritrypdb.org/gene/TcCLB.503627.20
TcCLB.508559.20	trans-sialidase_(pseudogene)_putative	1.46966	2.28e-11	3.66e-11	2.43e-10	7.00225	1	1	http://tritrypdb.org/gene/TcCLB.508559.20
TcCLB.511189.70	hypothetical_protein_conserved	1.47203	3.05e-06	1.28e-06	8.47e-06	4.94031	1	1	http://tritrypdb.org/gene/TcCLB.511189.70
TcCLB.508489.10	hypothetical_protein_conserved	1.47514	1.92e-10	2.29e-10	1.52e-09	5.62584	1	1	http://tritrypdb.org/gene/TcCLB.508489.10
TcCLB.506925.250	hypothetical_protein_conserved_(pseudogene)	1.47516	7.95e-10	7.95e-10	5.28e-09	6.44332	1	1	http://tritrypdb.org/gene/TcCLB.506925.250
TcCLB.504149.124	hypothetical_protein_conserved	1.47628	1.45e-11	2.5e-11	1.66e-10	6.48904	1	1	http://tritrypdb.org/gene/TcCLB.504149.124
TcCLB.506567.50	hypothetical_protein_conserved	1.47658	3.24e-11	4.88e-11	3.24e-10	5.98745	1	1	http://tritrypdb.org/gene/TcCLB.506567.50
TcCLB.506949.30	hypothetical_protein_conserved	1.4793	0.00213372	0.000539614	0.00358291	4.21818	1	1	http://tritrypdb.org/gene/TcCLB.506949.30
TcCLB.504637.10	hypothetical_protein	1.48493	0.129806	0.0243657	0.161783	0.174333	1	0	http://tritrypdb.org/gene/TcCLB.504637.10
TcCLB.506513.150	hypothetical_protein_conserved	1.48726	1.17e-09	1.11e-09	7.4e-09	5.32679	1	1	http://tritrypdb.org/gene/TcCLB.506513.150
TcCLB.506779.120	hypothetical_protein_conserved	1.48783	4.86e-12	1e-11	6.64e-11	6.77972	1	1	http://tritrypdb.org/gene/TcCLB.506779.120
TcCLB.506931.30	hypothetical_protein_conserved	1.48793	3.78e-10	4.13e-10	2.74e-09	5.96764	1	1	http://tritrypdb.org/gene/TcCLB.506931.30
TcCLB.510381.20	ABC_transporter_putative	1.4894	1.12e-06	5.12e-07	3.4e-06	6.25987	1	1	http://tritrypdb.org/gene/TcCLB.510381.20
TcCLB.504033.200	hypothetical_protein	1.49007	6.12e-12	1.2e-11	7.98e-11	7.33195	1	1	http://tritrypdb.org/gene/TcCLB.504033.200
TcCLB.503755.60	surface_protease_GP63_(pseudogene)_putative	1.49266	3.18e-09	2.71e-09	1.8e-08	5.52561	1	1	http://tritrypdb.org/gene/TcCLB.503755.60
TcCLB.507559.90	hypothetical_protein	1.4957	6.98e-15	5.1e-14	3.38e-13	7.53155	1	1	http://tritrypdb.org/gene/TcCLB.507559.90
TcCLB.509871.80	dispersed_gene_family_protein_1_(DGF-1)_putative	1.49641	4.25e-08	2.69e-08	1.79e-07	8.425	1	1	http://tritrypdb.org/gene/TcCLB.509871.80
TcCLB.506753.15	dispersed_gene_family_protein_1_(DGF-1_pseudogene)_putative	1.49714	0.0236927	0.00506996	0.0336634	1.63163	1	1	http://tritrypdb.org/gene/TcCLB.506753.15
TcCLB.508831.230	no_Fct	1.499	0.0112365	0.00253527	0.0168336	1.43894	1	1	http://tritrypdb.org/gene/TcCLB.508831.230
TcCLB.504427.20	hypothetical_protein_conserved	1.49976	7.98e-10	7.98e-10	5.3e-09	5.21111	1	1	http://tritrypdb.org/gene/TcCLB.504427.20
TcCLB.503401.40	glycosyl_transferase_putative	1.50006	2.89e-12	6.5e-12	4.32e-11	7.85309	1	1	http://tritrypdb.org/gene/TcCLB.503401.40
TcCLB.506285.10	hypothetical_protein	1.50078	0.000191002	5.76e-05	0.000382772	2.7939	1	1	http://tritrypdb.org/gene/TcCLB.506285.10
TcCLB.511677.20	trans-sialidase_putative	1.5025	1.21e-06	5.47e-07	3.63e-06	4.16281	1	1	http://tritrypdb.org/gene/TcCLB.511677.20
TcCLB.511355.20	hypothetical_protein_conserved	1.5056	1.09e-10	1.4e-10	9.32e-10	6.95323	1	1	http://tritrypdb.org/gene/TcCLB.511355.20
TcCLB.509167.180	kinesin_putative	1.50578	1.54e-10	1.9e-10	1.26e-09	7.49497	1	1	http://tritrypdb.org/gene/TcCLB.509167.180
TcCLB.506357.10	hypothetical_protein_conserved	1.50686	1.09e-12	2.82e-12	1.87e-11	6.22172	1	1	http://tritrypdb.org/gene/TcCLB.506357.10
TcCLB.510101.280	kinesin_putative	1.50962	3.07e-12	6.82e-12	4.53e-11	9.08609	1	1	http://tritrypdb.org/gene/TcCLB.510101.280
TcCLB.503885.100	hypothetical_protein_conserved	1.51535	0.03844	0.00794414	0.0527472	0.966783	1	0	http://tritrypdb.org/gene/TcCLB.503885.100
TcCLB.506693.30	RNA-binding_protein_6_putative	1.51548	0.00428872	0.0010332	0.00686024	2.46298	1	1	http://tritrypdb.org/gene/TcCLB.506693.30
TcCLB.506625.180	hypothetical_protein_conserved	1.51663	3.53e-11	5.26e-11	3.49e-10	6.54267	1	1	http://tritrypdb.org/gene/TcCLB.506625.180
TcCLB.507699.90	mucin_TcMUCII_putative	1.52269	1.68e-06	7.39e-07	4.91e-06	3.4236	1	1	http://tritrypdb.org/gene/TcCLB.507699.90
TcCLB.506529.541	hypothetical_protein	1.52601	0.000988011	0.000264018	0.00175302	4.50634	1	1	http://tritrypdb.org/gene/TcCLB.506529.541
TcCLB.507871.9	dispersed_gene_family_protein_1_(DGF-1)_putative	1.53048	0.000565003	0.000157693	0.00104705	4.13554	1	1	http://tritrypdb.org/gene/TcCLB.507871.9
TcCLB.510751.30	hypothetical_protein	1.53142	8.26e-09	6.24e-09	4.14e-08	6.37693	1	1	http://tritrypdb.org/gene/TcCLB.510751.30
TcCLB.509125.10	mannosyltransferase-like_protein_putative	1.53147	4.84e-15	3.91e-14	2.6e-13	8.42172	1	1	http://tritrypdb.org/gene/TcCLB.509125.10
TcCLB.511805.20	Trichohyalin_putative	1.53336	3.59e-08	2.31e-08	1.53e-07	4.54638	1	1	http://tritrypdb.org/gene/TcCLB.511805.20
TcCLB.506267.60	mucin_TcMUCII_putative	1.53342	2.83e-05	9.79e-06	6.5e-05	3.02855	1	1	http://tritrypdb.org/gene/TcCLB.506267.60
TcCLB.509153.30	hypothetical_protein_conserved	1.53418	1.76e-13	6.29e-13	4.18e-12	7.92689	1	1	http://tritrypdb.org/gene/TcCLB.509153.30
TcCLB.411427.40	hypothetical_protein_conserved	1.54253	7.84e-07	3.7e-07	2.46e-06	5.37135	1	1	http://tritrypdb.org/gene/TcCLB.411427.40
TcCLB.511173.10	trans-sialidase_putative	1.54426	0.00971937	0.00221327	0.0146956	1.8413	1	1	http://tritrypdb.org/gene/TcCLB.511173.10
TcCLB.508771.10	D-alanyl-glycyl_endopeptidase-like_protein_putativecysteine_peptidase_Clan_CA_family_C51_putative	1.55148	2.99e-08	1.97e-08	1.31e-07	5.85121	1	1	http://tritrypdb.org/gene/TcCLB.508771.10
TcCLB.511141.10	hypothetical_protein_conserved	1.55215	6.65e-06	2.6e-06	1.73e-05	5.26847	1	1	http://tritrypdb.org/gene/TcCLB.511141.10
TcCLB.506519.140	hypothetical_protein_conserved_(pseudogene)	1.55706	1.72e-09	1.56e-09	1.04e-08	5.58043	1	1	http://tritrypdb.org/gene/TcCLB.506519.140
TcCLB.503855.60	hypothetical_protein_conserved	1.55724	1.52e-09	1.41e-09	9.36e-09	6.42948	1	1	http://tritrypdb.org/gene/TcCLB.503855.60
TcCLB.485889.10	hypothetical_protein_conserved	1.55952	3.93e-12	8.32e-12	5.52e-11	7.48263	1	1	http://tritrypdb.org/gene/TcCLB.485889.10
TcCLB.511587.30	retrotransposon_hot_spot_protein_(RHS_pseudogene)_putative	1.56013	1.66e-11	2.82e-11	1.87e-10	9.26949	1	1	http://tritrypdb.org/gene/TcCLB.511587.30
TcCLB.510243.20	hypothetical_protein_conserved	1.56182	7.48e-12	1.43e-11	9.52e-11	6.42668	1	1	http://tritrypdb.org/gene/TcCLB.510243.20
TcCLB.510741.140	hypothetical_protein_conserved	1.56321	4.92e-11	7.03e-11	4.67e-10	6.18219	1	1	http://tritrypdb.org/gene/TcCLB.510741.140
TcCLB.508241.40	hypothetical_protein	1.56322	2.37e-14	1.27e-13	8.45e-13	6.86439	1	1	http://tritrypdb.org/gene/TcCLB.508241.40
TcCLB.510021.190	hypothetical_protein	1.56541	0.00141412	0.000368389	0.00244602	2.03269	1	1	http://tritrypdb.org/gene/TcCLB.510021.190
TcCLB.506961.35	trans-sialidase_(pseudogene)_putative	1.56769	1.05e-11	1.91e-11	1.27e-10	5.46073	1	1	http://tritrypdb.org/gene/TcCLB.506961.35
TcCLB.506357.14	no_Fct	1.56916	0.0977558	0.0187722	0.124643	-0.587007	1	0	http://tritrypdb.org/gene/TcCLB.506357.14
TcCLB.510371.80	hypothetical_protein	1.57428	0.0131531	0.00293164	0.0194654	1.30605	1	1	http://tritrypdb.org/gene/TcCLB.510371.80
TcCLB.506567.80	hypothetical_protein	1.57726	1.56e-10	1.92e-10	1.28e-09	6.00832	1	1	http://tritrypdb.org/gene/TcCLB.506567.80
TcCLB.511603.60	mucin_TcMUCII_putative	1.57829	6.88e-07	3.29e-07	2.19e-06	3.53873	1	1	http://tritrypdb.org/gene/TcCLB.511603.60
TcCLB.510073.10	cysteine_peptidase_(N-terminal)_putativecysteine_peptidase_clan_CA_family_C1_cathepsin_L-like_putative	1.57877	3.63e-09	3.04e-09	2.02e-08	7.39821	1	1	http://tritrypdb.org/gene/TcCLB.510073.10
TcCLB.504425.80	hypothetical_protein_conserved	1.57925	6.05e-13	1.74e-12	1.15e-11	7.00942	1	1	http://tritrypdb.org/gene/TcCLB.504425.80
TcCLB.509973.25	mucin_TcMUC_(pseudogene)_putative	1.58123	3.84e-07	1.93e-07	1.28e-06	4.69319	1	1	http://tritrypdb.org/gene/TcCLB.509973.25
TcCLB.399033.10	hypothetical_protein	1.58268	2.08e-10	2.45e-10	1.63e-09	6.17005	1	1	http://tritrypdb.org/gene/TcCLB.399033.10
TcCLB.503509.10	hypothetical_protein_conserved	1.58483	5.23e-14	2.33e-13	1.55e-12	8.04703	1	1	http://tritrypdb.org/gene/TcCLB.503509.10
TcCLB.509815.5	trans-sialidase_putative	1.5853	0.0407525	0.00838137	0.0556504	1.41932	1	0	http://tritrypdb.org/gene/TcCLB.509815.5
TcCLB.503455.10	chaperone_DNAJ_protein_putative	1.58777	1.28e-12	3.26e-12	2.17e-11	6.1511	1	1	http://tritrypdb.org/gene/TcCLB.503455.10
TcCLB.507089.170	hypothetical_protein_conserved	1.5895	1.4e-10	1.74e-10	1.15e-09	9.49224	1	1	http://tritrypdb.org/gene/TcCLB.507089.170
TcCLB.511605.5	mucin-associated_surface_protein_(MASP_pseudogene)_putative	1.59228	3.81e-07	1.92e-07	1.27e-06	5.63043	1	1	http://tritrypdb.org/gene/TcCLB.511605.5
TcCLB.511213.81	retrotransposon_hot_spot_protein_(RHS_pseudogene)_putative	1.59231	3.9e-10	4.25e-10	2.82e-09	5.88257	1	1	http://tritrypdb.org/gene/TcCLB.511213.81
[truncated: 636 more rows]

## Sheet: Ama4 vs Trypo
TriTrypDB Gene ID	Annotation	log2Fold-change	P-value	Qval	adj.P.Val	AveExpr	Qvals.fc	AdjPvals.fc	TriTrypDB Link
TcCLB.508285.30	ATP-dependent_DEAD/H_RNA_helicase_(pseudogene)_putative	-4.43617	0.000191869	0.000138143	0.000633746	-0.701272	1	1	http://tritrypdb.org/gene/TcCLB.508285.30
TcCLB.507553.10	no_Fct	-4.26986	0.000789587	0.000457059	0.00209681	-1.23591	1	1	http://tritrypdb.org/gene/TcCLB.507553.10
TcCLB.510171.10	trans-sialidase_putative	-3.9937	6.38e-11	5.77e-10	2.65e-09	8.6064	1	1	http://tritrypdb.org/gene/TcCLB.510171.10
TcCLB.504047.5	urocanate_hydratase_putative	-3.9815	1.2e-08	4.2e-08	1.93e-07	3.31651	1	1	http://tritrypdb.org/gene/TcCLB.504047.5
TcCLB.507485.150	amastin_putative	-3.88894	3.79e-13	1.22e-11	5.58e-11	9.08825	1	1	http://tritrypdb.org/gene/TcCLB.507485.150
TcCLB.510535.109	trans-sialidase_putative	-3.84184	8.01e-10	4.43e-09	2.03e-08	6.29426	1	1	http://tritrypdb.org/gene/TcCLB.510535.109
TcCLB.510307.250	trans-sialidase_(pseudogene)_putative	-3.83003	3.87e-09	1.64e-08	7.52e-08	6.55148	1	1	http://tritrypdb.org/gene/TcCLB.510307.250
TcCLB.511071.40	amastin_putative	-3.72439	1.55e-13	7.5e-12	3.44e-11	8.9119	1	1	http://tritrypdb.org/gene/TcCLB.511071.40
TcCLB.508285.40	retrotransposon_hot_spot_protein_(RHS_pseudogene)_putativeretrotransposon_hot_spot_protein_1_(RHS1)_putative_interrupted	-3.48531	0.000640471	0.00038309	0.00175747	-1.0305	1	1	http://tritrypdb.org/gene/TcCLB.508285.40
TcCLB.506409.255	surface_protease_GP63_putative	-3.37416	9.54e-10	5.16e-09	2.37e-08	4.21625	1	1	http://tritrypdb.org/gene/TcCLB.506409.255
TcCLB.506683.240	trans-sialidase_putative	-3.33497	1.51e-11	1.92e-10	8.83e-10	8.03653	1	1	http://tritrypdb.org/gene/TcCLB.506683.240
TcCLB.507709.18	no_Fct	-3.29042	0.00363334	0.00171529	0.0078691	-1.08544	1	1	http://tritrypdb.org/gene/TcCLB.507709.18
TcCLB.510289.40	GPI_inositol_deacylase_precursor_putative	-3.26089	2.86e-13	9.74e-12	4.47e-11	7.01811	1	1	http://tritrypdb.org/gene/TcCLB.510289.40
TcCLB.508283.60	retrotransposon_hot_spot_protein_(RHS_pseudogene)_putative	-3.24504	0.00141632	0.000757197	0.00347373	-1.14262	1	1	http://tritrypdb.org/gene/TcCLB.508283.60
TcCLB.430737.10	proline_racemaseB-cell_mitogen_precursor_putative	-3.2248	0.00177338	0.000919423	0.00421797	-1.00983	1	1	http://tritrypdb.org/gene/TcCLB.430737.10
TcCLB.398343.9	surface_protease_GP63_putative	-3.21726	1.98e-09	9.14e-09	4.19e-08	4.15715	1	1	http://tritrypdb.org/gene/TcCLB.398343.9
TcCLB.510283.49	no_Fct	-3.20979	0.00174051	0.000904852	0.00415112	0.854422	1	1	http://tritrypdb.org/gene/TcCLB.510283.49
TcCLB.509993.5	hypothetical_protein_conserved_(pseudogene)	-3.16869	0.00193927	0.000994578	0.00456275	-0.840092	1	1	http://tritrypdb.org/gene/TcCLB.509993.5
TcCLB.504427.231	no_Fct	-3.13694	0.00795096	0.00340321	0.0156127	-1.79541	1	1	http://tritrypdb.org/gene/TcCLB.504427.231
TcCLB.510565.156	no_Fct	-3.13661	0.0097135	0.00404558	0.0185596	-0.889269	1	1	http://tritrypdb.org/gene/TcCLB.510565.156
TcCLB.506127.50	hypothetical_protein_conserved	-3.02957	2.09e-05	2.12e-05	9.75e-05	2.93657	1	1	http://tritrypdb.org/gene/TcCLB.506127.50
TcCLB.510959.15	elongation_factor_1-gamma_(EF-1-gamma_pseudogene)_putative	-2.99311	0.00085211	0.000488048	0.00223898	-1.31302	1	1	http://tritrypdb.org/gene/TcCLB.510959.15
TcCLB.503977.79	elongation_factor_1-gamma_(EF-1-gamma)_putative	-2.99311	0.00137551	0.000738842	0.00338953	-1.55248	1	1	http://tritrypdb.org/gene/TcCLB.503977.79
TcCLB.506625.50	hypothetical_protein	-2.99311	0.000818033	0.000471729	0.00216411	-1.20595	1	1	http://tritrypdb.org/gene/TcCLB.506625.50
TcCLB.510449.20	hypothetical_protein_conserved_(pseudogene)	-2.99311	0.00105221	0.000584458	0.00268127	-1.30127	1	1	http://tritrypdb.org/gene/TcCLB.510449.20
TcCLB.506473.4	hypothetical_protein_conserved_(pseudogene)	-2.99311	0.000927296	0.000524916	0.00240812	-1.61239	1	1	http://tritrypdb.org/gene/TcCLB.506473.4
TcCLB.506765.80	mucin_TcMUCII_putative	-2.99311	0.00182688	0.000943946	0.00433047	-1.45048	1	1	http://tritrypdb.org/gene/TcCLB.506765.80
TcCLB.508607.20	no_Fct	-2.99311	0.000897313	0.000509714	0.00233838	-1.43158	1	1	http://tritrypdb.org/gene/TcCLB.508607.20
TcCLB.508605.10	retrotransposon_hot_spot_protein_(RHS_pseudogene)_putative	-2.99311	0.00316735	0.00152079	0.00697683	-1.1904	1	1	http://tritrypdb.org/gene/TcCLB.508605.10
TcCLB.508143.65	elongation_factor_1-gamma_(EF-1-gamma_pseudogene)_putative	-2.98945	0.00134605	0.000725409	0.0033279	1.09698	1	1	http://tritrypdb.org/gene/TcCLB.508143.65
TcCLB.510879.50	regulatory_subunit_of_protein_kinase_a-like_protein_putative	-2.97336	4.6e-14	3.62e-12	1.66e-11	8.56343	1	1	http://tritrypdb.org/gene/TcCLB.510879.50
TcCLB.509011.90	lipase_putative	-2.90941	9.1e-13	2.09e-11	9.6e-11	6.21399	1	1	http://tritrypdb.org/gene/TcCLB.509011.90
TcCLB.479517.50	surface_protease_GP63_putative	-2.86919	3.89e-06	5.33e-06	2.45e-05	3.41984	1	1	http://tritrypdb.org/gene/TcCLB.479517.50
TcCLB.508375.89	fucose_kinase_putative	-2.81107	2.4e-06	3.58e-06	1.64e-05	3.51071	1	1	http://tritrypdb.org/gene/TcCLB.508375.89
TcCLB.503811.10	lipophosphoglycan_biosynthetic_protein_putativeheat_shock_protein_90_putativeglucose_regulated_protein_94_putative	-2.80438	1.88e-15	5.67e-13	2.6e-12	9.32466	1	1	http://tritrypdb.org/gene/TcCLB.503811.10
TcCLB.459793.20	mucin-associated_surface_protein_(MASP_pseudogene)_putative	-2.79444	0.0125887	0.00508431	0.0233249	0.049018	1	1	http://tritrypdb.org/gene/TcCLB.459793.20
TcCLB.508283.25	hypothetical_protein_conserved_(pseudogene)	-2.7933	0.0112077	0.00459394	0.0210753	-0.62016	1	1	http://tritrypdb.org/gene/TcCLB.508283.25
TcCLB.508279.10	trans-sialidase_(pseudogene)_putative	-2.78651	0.00178286	0.00092392	0.0042386	-1.08895	1	1	http://tritrypdb.org/gene/TcCLB.508279.10
TcCLB.506377.10	trans-sialidase_putative	-2.75781	0.00283389	0.00138104	0.00633568	-1.03667	1	1	http://tritrypdb.org/gene/TcCLB.506377.10
TcCLB.507747.10	surface_protease_GP63_putative	-2.75658	3.2e-10	2.1e-09	9.64e-09	6.04085	1	1	http://tritrypdb.org/gene/TcCLB.507747.10
TcCLB.508039.70	hypothetical_protein_conserved	-2.71838	0.0170252	0.00661833	0.0303624	-0.512174	1	1	http://tritrypdb.org/gene/TcCLB.508039.70
TcCLB.506767.74	mucin_TcMUCII_(pseudogene)_putative	-2.68813	0.0090821	0.00381817	0.0175163	-0.43957	1	1	http://tritrypdb.org/gene/TcCLB.506767.74
TcCLB.510073.10	cysteine_peptidase_(N-terminal)_putativecysteine_peptidase_clan_CA_family_C1_cathepsin_L-like_putative	-2.68554	8.22e-11	7.16e-10	3.28e-09	7.39821	1	1	http://tritrypdb.org/gene/TcCLB.510073.10
TcCLB.508607.10	retrotransposon_hot_spot_(RHS)_protein_putative	-2.66427	0.00476273	0.00216857	0.00994859	1.12871	1	1	http://tritrypdb.org/gene/TcCLB.508607.10
TcCLB.506591.4	lipophosphoglycan_biosynthetic_protein_putative	-2.65413	6.65e-14	4.46e-12	2.05e-11	8.61183	1	1	http://tritrypdb.org/gene/TcCLB.506591.4
TcCLB.506047.20	retrotransposon_hot_spot_(RHS)_protein_putative	-2.63613	0.0141255	0.0056243	0.0258022	-0.0956787	1	1	http://tritrypdb.org/gene/TcCLB.506047.20
TcCLB.511333.10	calpain-like_cysteine_peptidase_putativecysteine_peptidase_Clan_CA_family_C2_putative	-2.58396	0.000306505	0.000203922	0.000935519	3.21671	1	1	http://tritrypdb.org/gene/TcCLB.511333.10
TcCLB.506767.155	hypothetical_protein_conserved_(pseudogene)	-2.58127	0.00132409	0.000715605	0.00328292	1.7447	1	1	http://tritrypdb.org/gene/TcCLB.506767.155
TcCLB.509993.60	mucin_TcMUCI_putative	-2.5553	0.0157168	0.00617811	0.0283428	-0.875245	1	1	http://tritrypdb.org/gene/TcCLB.509993.60
TcCLB.508227.51	surface_protease_GP63_(pseudogene)_putative	-2.53997	0.00491535	0.0022265	0.0102144	-1.23502	1	1	http://tritrypdb.org/gene/TcCLB.508227.51
TcCLB.511179.60	hypothetical_protein_conserved	-2.53071	5.85e-07	1.1e-06	5.03e-06	3.87547	1	1	http://tritrypdb.org/gene/TcCLB.511179.60
TcCLB.510073.17	cysteine_peptidase_(C-terminal)_putative	-2.5292	4.49e-10	2.75e-09	1.26e-08	9.33231	1	1	http://tritrypdb.org/gene/TcCLB.510073.17
TcCLB.510517.110	hypothetical_protein	-2.52757	2.21e-08	7.04e-08	3.23e-07	5.19367	1	1	http://tritrypdb.org/gene/TcCLB.510517.110
TcCLB.507275.20	hypothetical_protein_conserved	-2.52437	3.85e-13	1.22e-11	5.58e-11	7.63346	1	1	http://tritrypdb.org/gene/TcCLB.507275.20
TcCLB.506933.10	hypothetical_protein_conserved	-2.50925	0.0030223	0.00146161	0.00670534	0.266865	1	1	http://tritrypdb.org/gene/TcCLB.506933.10
TcCLB.504427.244	no_Fct	-2.49762	0.0218327	0.00823993	0.0378017	-0.974842	1	1	http://tritrypdb.org/gene/TcCLB.504427.244
TcCLB.508607.40	retrotransposon_hot_spot_protein_(RHS_pseudogene)_putative	-2.49067	0.0420388	0.0146692	0.0672968	-0.401624	1	0	http://tritrypdb.org/gene/TcCLB.508607.40
TcCLB.503893.100	hypothetical_protein_conserved	-2.47654	2.14e-08	6.82e-08	3.13e-07	4.43095	1	1	http://tritrypdb.org/gene/TcCLB.503893.100
TcCLB.511335.9	calpain-like_cysteine_peptidase_putative	-2.45081	2.85e-06	4.12e-06	1.89e-05	3.64288	1	1	http://tritrypdb.org/gene/TcCLB.511335.9
TcCLB.511467.4	hypothetical_protein_conserved	-2.44919	0.000460674	0.000290478	0.0013326	2.64811	1	1	http://tritrypdb.org/gene/TcCLB.511467.4
TcCLB.504153.120	hypothetical_protein_conserved	-2.44124	1.01e-12	2.21e-11	1.01e-10	7.96686	1	1	http://tritrypdb.org/gene/TcCLB.504153.120
TcCLB.466879.10	hypothetical_protein_conserved	-2.43894	0.000599319	0.000362821	0.00166449	2.64502	1	1	http://tritrypdb.org/gene/TcCLB.466879.10
TcCLB.507709.90	sterol_C-24_reductase_putative	-2.42814	1.04e-08	3.72e-08	1.7e-07	5.9155	1	1	http://tritrypdb.org/gene/TcCLB.507709.90
TcCLB.418069.10	heat_shock_protein_70_(hsp70)_putative	-2.41435	5.61e-13	1.54e-11	7.05e-11	9.30613	1	1	http://tritrypdb.org/gene/TcCLB.418069.10
TcCLB.510313.10	hypothetical_protein_conserved	-2.41251	0.00475682	0.0021666	0.00993956	0.490137	1	1	http://tritrypdb.org/gene/TcCLB.510313.10
TcCLB.506661.30	fatty_acid_elongase_putative	-2.38789	2.2e-14	2.32e-12	1.07e-11	8.93931	1	1	http://tritrypdb.org/gene/TcCLB.506661.30
TcCLB.510105.100	UDP-glucose_dehydrogenase_putative	-2.38713	2.24e-14	2.32e-12	1.07e-11	6.97326	1	1	http://tritrypdb.org/gene/TcCLB.510105.100
TcCLB.506501.341	surface_protease_GP63_(pseudogene)_putative	-2.38464	9.82e-05	7.8e-05	0.000358015	1.05549	1	1	http://tritrypdb.org/gene/TcCLB.506501.341
TcCLB.508383.150	no_Fct	-2.37574	0.0173911	0.00674098	0.0309251	-1.30709	1	1	http://tritrypdb.org/gene/TcCLB.508383.150
TcCLB.507107.50	aminopeptidase_putative	-2.37233	0.000636455	0.000381141	0.00174853	1.99234	1	1	http://tritrypdb.org/gene/TcCLB.507107.50
TcCLB.509977.80	mucin-associated_surface_protein_(MASP)_putative	-2.37142	0.0131761	0.00528502	0.0242457	-1.07703	1	1	http://tritrypdb.org/gene/TcCLB.509977.80
TcCLB.506147.11	no_Fct	-2.37137	0.00205968	0.00104926	0.00481359	0.109935	1	1	http://tritrypdb.org/gene/TcCLB.506147.11
TcCLB.447705.9	hypothetical_protein_conserved	-2.36576	1.05e-05	1.2e-05	5.52e-05	5.09872	1	1	http://tritrypdb.org/gene/TcCLB.447705.9
TcCLB.510431.300	trans-sialidase_putative	-2.35736	6.63e-09	2.52e-08	1.16e-07	5.85553	1	1	http://tritrypdb.org/gene/TcCLB.510431.300
TcCLB.504055.83	no_Fct	-2.32306	0.0260477	0.009619	0.0441283	-1.37578	1	1	http://tritrypdb.org/gene/TcCLB.504055.83
TcCLB.508775.33	no_Fct	-2.31563	0.000466609	0.00029349	0.00134642	2.19576	1	1	http://tritrypdb.org/gene/TcCLB.508775.33
TcCLB.508095.10	hypothetical_protein_conserved	-2.30899	0.0020572	0.00104823	0.00480888	0.864908	1	1	http://tritrypdb.org/gene/TcCLB.508095.10
TcCLB.503639.40	no_Fct	-2.30251	0.0151494	0.00598185	0.0274425	0.474784	1	1	http://tritrypdb.org/gene/TcCLB.503639.40
TcCLB.503483.9	retrotransposon_hot_spot_(RHS)_protein_putative	-2.3002	0.0308286	0.0111516	0.0511593	0.54036	1	0	http://tritrypdb.org/gene/TcCLB.503483.9
TcCLB.505989.70	surface_protease_GP63_putativemetallopeptidase_putative	-2.29972	5.53e-09	2.15e-08	9.88e-08	5.71888	1	1	http://tritrypdb.org/gene/TcCLB.505989.70
TcCLB.484299.4	ATP-dependent_DEAD/H_RNA_helicase_putative	-2.28171	2.46e-08	7.72e-08	3.54e-07	4.45151	1	1	http://tritrypdb.org/gene/TcCLB.484299.4
TcCLB.508283.40	trans-sialidase_(pseudogene)_putative	-2.26306	0.00694236	0.00302454	0.0138754	1.54609	1	1	http://tritrypdb.org/gene/TcCLB.508283.40
TcCLB.506591.90	hypothetical_protein_conserved	-2.25974	0.000257497	0.000176518	0.000809797	2.66454	1	1	http://tritrypdb.org/gene/TcCLB.506591.90
TcCLB.511325.50	amino_acid_permease_putative	-2.25343	5.99e-07	1.12e-06	5.12e-06	4.22283	1	1	http://tritrypdb.org/gene/TcCLB.511325.50
TcCLB.454787.20	elongation_factor_1-gamma_(EF-1-gamma_pseudogene)_putative	-2.25182	0.0169805	0.00660751	0.0303128	-1.2058	1	1	http://tritrypdb.org/gene/TcCLB.454787.20
TcCLB.509007.50	hypothetical_protein	-2.23728	0.0491128	0.0167761	0.0769626	-1.19249	1	0	http://tritrypdb.org/gene/TcCLB.509007.50
TcCLB.503865.50	ankyrin_putative	-2.23699	5.56e-11	5.15e-10	2.36e-09	7.56777	1	1	http://tritrypdb.org/gene/TcCLB.503865.50
TcCLB.508147.45	hypothetical_protein_conserved_(pseudogene)	-2.23655	0.00793789	0.0033998	0.015597	2.42273	1	1	http://tritrypdb.org/gene/TcCLB.508147.45
TcCLB.505843.49	2Fe-2S_iron-sulfur_cluster_binding_domain_containing_protein_putative	-2.23322	0.000668123	0.00039682	0.00182046	3.46255	1	1	http://tritrypdb.org/gene/TcCLB.505843.49
TcCLB.504637.10	hypothetical_protein	-2.22727	0.0554826	0.0186526	0.0855712	0.174333	1	0	http://tritrypdb.org/gene/TcCLB.504637.10
TcCLB.507555.80	retrotransposon_hot_spot_(RHS)_protein_putative	-2.2233	0.0305178	0.0110514	0.0506998	2.49279	1	0	http://tritrypdb.org/gene/TcCLB.507555.80
TcCLB.504769.41	surface_protease_GP63_(pseudogene)_putative	-2.2208	0.028927	0.0105373	0.048341	-0.605912	1	1	http://tritrypdb.org/gene/TcCLB.504769.41
TcCLB.510279.70	hypothetical_protein	-2.21889	0.0193652	0.00741044	0.0339963	-1.49364	1	1	http://tritrypdb.org/gene/TcCLB.510279.70
TcCLB.507237.30	hypothetical_protein	-2.19868	0.0378337	0.0133634	0.0613062	-0.514157	1	0	http://tritrypdb.org/gene/TcCLB.507237.30
TcCLB.507867.100	hypothetical_protein	-2.19253	5.25e-08	1.44e-07	6.62e-07	6.23467	1	1	http://tritrypdb.org/gene/TcCLB.507867.100
TcCLB.430737.20	hypothetical_protein_conserved	-2.18491	0.025482	0.00944373	0.0433243	1.69023	1	1	http://tritrypdb.org/gene/TcCLB.430737.20
TcCLB.507669.160	hypothetical_protein_conserved	-2.18358	5.52e-13	1.53e-11	7.04e-11	7.75614	1	1	http://tritrypdb.org/gene/TcCLB.507669.160
TcCLB.507485.40	hypothetical_protein_conserved	-2.16977	2.09e-06	3.18e-06	1.46e-05	6.27135	1	1	http://tritrypdb.org/gene/TcCLB.507485.40
TcCLB.509965.330	hypothetical_protein_conserved	-2.1629	1.75e-13	7.5e-12	3.44e-11	7.76674	1	1	http://tritrypdb.org/gene/TcCLB.509965.330
TcCLB.510961.10	mucin-associated_surface_protein_(MASP)_putative	-2.16214	0.0243245	0.00906633	0.0415929	-0.782346	1	1	http://tritrypdb.org/gene/TcCLB.510961.10
TcCLB.510143.24	Hsc70-interacting_protein_(Hip)_putative	-2.15642	1.47e-13	7.41e-12	3.4e-11	8.34718	1	1	http://tritrypdb.org/gene/TcCLB.510143.24
TcCLB.506519.85	no_Fct	-2.15557	0.00171844	0.000894804	0.00410503	1.31328	1	1	http://tritrypdb.org/gene/TcCLB.506519.85
TcCLB.506211.150	polyprenyl_synthase_putative	-2.15025	4.13e-08	1.18e-07	5.43e-07	8.36605	1	1	http://tritrypdb.org/gene/TcCLB.506211.150
TcCLB.407477.44	hypothetical_protein_conserved	-2.14708	5.71e-08	1.54e-07	7.09e-07	4.365	1	1	http://tritrypdb.org/gene/TcCLB.407477.44
TcCLB.510721.13	no_Fct	-2.13807	0.00961017	0.00400913	0.0183924	0.481128	1	1	http://tritrypdb.org/gene/TcCLB.510721.13
TcCLB.503659.10	mucin-associated_surface_protein_(MASP)_putative	-2.13159	0.0505999	0.017209	0.0789482	-1.07609	1	0	http://tritrypdb.org/gene/TcCLB.503659.10
TcCLB.509707.10	hypothetical_protein_conserved	-2.12716	3e-08	9.08e-08	4.17e-07	4.49911	1	1	http://tritrypdb.org/gene/TcCLB.509707.10
TcCLB.506797.40	hypothetical_protein_conserved	-2.12663	4.39e-06	5.88e-06	2.7e-05	4.93566	1	1	http://tritrypdb.org/gene/TcCLB.506797.40
TcCLB.503759.30	trans-sialidase_putative	-2.12636	0.0392461	0.0138131	0.0633691	1.79076	1	0	http://tritrypdb.org/gene/TcCLB.503759.30
TcCLB.510205.30	hypothetical_protein	-2.12372	0.0220251	0.00830568	0.0381034	-0.807341	1	1	http://tritrypdb.org/gene/TcCLB.510205.30
TcCLB.511701.30	no_Fct	-2.10416	0.0424246	0.0147812	0.0678107	-1.3258	1	0	http://tritrypdb.org/gene/TcCLB.511701.30
TcCLB.511613.10	mucin-associated_surface_protein_(MASP)_putative	-2.09261	0.0188459	0.00723846	0.0332073	-1.23087	1	1	http://tritrypdb.org/gene/TcCLB.511613.10
TcCLB.511559.10	hypothetical_protein_conserved	-2.0838	0.00781436	0.00335036	0.0153702	2.5408	1	1	http://tritrypdb.org/gene/TcCLB.511559.10
TcCLB.507041.10	hypothetical_protein_conserved	-2.08008	3.19e-13	1.05e-11	4.83e-11	6.99358	1	1	http://tritrypdb.org/gene/TcCLB.507041.10
TcCLB.506747.10	orotidine-5-phosphate_decarboxylase/orotate_phosphoribosyltransferase_(pseudogene)_putativeOMPDCase-OPRTase_putative_point_mutation	-2.07232	2.83e-07	5.96e-07	2.73e-06	5.20546	1	1	http://tritrypdb.org/gene/TcCLB.506747.10
TcCLB.507511.60	hypothetical_protein	-2.06663	0.00419234	0.00194529	0.00892427	1.50259	1	1	http://tritrypdb.org/gene/TcCLB.507511.60
TcCLB.480785.10	protein_kinase_putative	-2.04901	0.0402	0.0141161	0.0647594	-1.37906	1	0	http://tritrypdb.org/gene/TcCLB.480785.10
TcCLB.508813.15	heat_shock_protein_70_putative	-2.04698	1.94e-06	2.98e-06	1.37e-05	8.04241	1	1	http://tritrypdb.org/gene/TcCLB.508813.15
TcCLB.508379.10	fucose_kinase_putative	-2.03033	7.13e-10	4.08e-09	1.87e-08	4.98766	1	1	http://tritrypdb.org/gene/TcCLB.508379.10
TcCLB.510841.20	hypothetical_protein_conserved	-2.02156	1.56e-06	2.48e-06	1.14e-05	4.76019	1	1	http://tritrypdb.org/gene/TcCLB.510841.20
TcCLB.511875.25	elongation_factor_1-gamma_(EF-1-gamma_pseudogene)_putative	-2.017	0.0276568	0.0101377	0.0465081	-0.96513	1	1	http://tritrypdb.org/gene/TcCLB.511875.25
TcCLB.424195.5	hypothetical_protein_conserved	-2.01673	0.000191849	0.000138143	0.000633746	3.36068	1	1	http://tritrypdb.org/gene/TcCLB.424195.5
TcCLB.508229.50	hypothetical_protein	-2.01442	0.0269105	0.0098912	0.0453771	1.15923	1	1	http://tritrypdb.org/gene/TcCLB.508229.50
TcCLB.506811.50	hypothetical_protein_conserved	-2.00514	1.95e-05	2.01e-05	9.22e-05	3.62495	1	1	http://tritrypdb.org/gene/TcCLB.506811.50
TcCLB.511701.20	no_Fct	-1.99562	0.0305648	0.0110632	0.0507538	-0.810555	1	0	http://tritrypdb.org/gene/TcCLB.511701.20
TcCLB.508099.40	hypothetical_protein	-1.99179	0.0256982	0.00950686	0.0436139	-0.37663	1	1	http://tritrypdb.org/gene/TcCLB.508099.40
TcCLB.509993.31	mucin-associated_surface_protein_(MASP_pseudogene)_putative	-1.97779	0.0536644	0.0181161	0.0831099	0.9432	1	0	http://tritrypdb.org/gene/TcCLB.509993.31
TcCLB.511215.90	hypothetical_protein_conserved	-1.96604	0.0064086	0.00282382	0.0129546	0.621431	1	1	http://tritrypdb.org/gene/TcCLB.511215.90
TcCLB.510565.143	no_Fct	-1.96333	0.0426156	0.014835	0.0680576	-0.161015	1	0	http://tritrypdb.org/gene/TcCLB.510565.143
TcCLB.507047.180	hypothetical_protein_conserved	-1.9574	7.31e-07	1.32e-06	6.08e-06	4.65442	1	1	http://tritrypdb.org/gene/TcCLB.507047.180
TcCLB.507641.240	hypothetical_protein	-1.95505	4.25e-06	5.72e-06	2.63e-05	4.10862	1	1	http://tritrypdb.org/gene/TcCLB.507641.240
TcCLB.509297.20	hypothetical_protein_conserved	-1.95165	1.21e-13	6.72e-12	3.08e-11	7.56829	1	1	http://tritrypdb.org/gene/TcCLB.509297.20
TcCLB.509157.279	chaperonin_HSP60_mitochondrial_precursor_putative	-1.94639	1.39e-07	3.29e-07	1.51e-06	4.73098	1	1	http://tritrypdb.org/gene/TcCLB.509157.279
TcCLB.503393.10	amino_acid_permease_putative	-1.94606	0.000102606	8.1e-05	0.000371604	4.09259	1	1	http://tritrypdb.org/gene/TcCLB.503393.10
TcCLB.511127.74	hypothetical_protein_conserved	-1.94317	9.91e-08	2.47e-07	1.13e-06	4.66076	1	1	http://tritrypdb.org/gene/TcCLB.511127.74
TcCLB.508307.200	hypothetical_protein_conserved	-1.93341	5.82e-05	5.03e-05	0.000230779	3.46904	1	1	http://tritrypdb.org/gene/TcCLB.508307.200
TcCLB.506357.100	DNA-directed_RNA_polymerase_II_putative	-1.93029	2.17e-11	2.58e-10	1.19e-09	6.27645	1	1	http://tritrypdb.org/gene/TcCLB.506357.100
TcCLB.506047.16	N-acetyltransferase_complex_ARD1_subunit_(pseudogene)_putative	-1.92929	0.0425861	0.0148284	0.0680272	-0.935476	1	0	http://tritrypdb.org/gene/TcCLB.506047.16
TcCLB.508379.20	hypothetical_protein_conserved	-1.92878	1.11e-05	1.27e-05	5.81e-05	4.63505	1	1	http://tritrypdb.org/gene/TcCLB.508379.20
TcCLB.509473.10	hypothetical_protein_(pseudogene)	-1.92749	1.43e-09	7.17e-09	3.29e-08	9.2531	1	1	http://tritrypdb.org/gene/TcCLB.509473.10
TcCLB.509581.35	hypothetical_protein_conserved_(pseudogene)	-1.92647	0.000259855	0.00017792	0.000816229	2.71507	1	1	http://tritrypdb.org/gene/TcCLB.509581.35
TcCLB.506487.37	hypothetical_protein	-1.92401	1.16e-05	1.31e-05	5.99e-05	3.86803	1	1	http://tritrypdb.org/gene/TcCLB.506487.37
TcCLB.511529.259	hypothetical_protein_conserved	-1.9221	9.12e-08	2.31e-07	1.06e-06	4.26791	1	1	http://tritrypdb.org/gene/TcCLB.511529.259
TcCLB.505807.20	hypothetical_protein_conserved	-1.91471	5.86e-12	9.07e-11	4.16e-10	6.42926	1	1	http://tritrypdb.org/gene/TcCLB.505807.20
TcCLB.507091.4	fucose_kinase_putative	-1.91004	3.18e-09	1.39e-08	6.39e-08	4.77799	1	1	http://tritrypdb.org/gene/TcCLB.507091.4
TcCLB.508807.5	glycosylphosphatidylinositol-specific_phospholipase_C	-1.90815	1.74e-09	8.37e-09	3.84e-08	6.02187	1	1	http://tritrypdb.org/gene/TcCLB.508807.5
TcCLB.506825.150	hypothetical_protein_conserved	-1.907	2.94e-13	9.86e-12	4.52e-11	7.89362	1	1	http://tritrypdb.org/gene/TcCLB.506825.150
TcCLB.511417.100	anti-silencing_protein_ASF_1_putative	-1.90462	5.51e-09	2.15e-08	9.88e-08	5.0189	1	1	http://tritrypdb.org/gene/TcCLB.511417.100
TcCLB.504129.50	hypothetical_protein_conserved_(pseudogene)	-1.90368	7.71e-06	9.3e-06	4.27e-05	4.78654	1	1	http://tritrypdb.org/gene/TcCLB.504129.50
TcCLB.508209.144	hypothetical_protein_conserved	-1.90274	5.79e-09	2.25e-08	1.03e-07	6.25311	1	1	http://tritrypdb.org/gene/TcCLB.508209.144
TcCLB.503531.40	hypothetical_protein_conserved	-1.90152	9.98e-08	2.48e-07	1.14e-06	5.25463	1	1	http://tritrypdb.org/gene/TcCLB.503531.40
TcCLB.507747.185	no_Fct	-1.90028	0.0566765	0.0190008	0.0871684	-1.37205	1	0	http://tritrypdb.org/gene/TcCLB.507747.185
TcCLB.511603.434	surface_protease_GP63_putative	-1.89738	0.00422687	0.0019578	0.00898167	0.834773	1	1	http://tritrypdb.org/gene/TcCLB.511603.434
TcCLB.506945.190	cytochrome_p450-like_protein_putative	-1.89731	1.26e-09	6.46e-09	2.96e-08	6.98608	1	1	http://tritrypdb.org/gene/TcCLB.506945.190
TcCLB.508093.39	GMP_synthetase_(pseudogene)_putative	-1.89696	7.51e-07	1.35e-06	6.2e-06	4.28107	1	1	http://tritrypdb.org/gene/TcCLB.508093.39
TcCLB.430605.40	2Fe-2S_iron-sulfur_cluster_binding_domain_containing_protein_putative	-1.8968	3.1e-08	9.35e-08	4.29e-07	5.00517	1	1	http://tritrypdb.org/gene/TcCLB.430605.40
TcCLB.508647.174	hypothetical_protein_conserved	-1.88367	5.38e-06	6.9e-06	3.17e-05	4.86107	1	1	http://tritrypdb.org/gene/TcCLB.508647.174
TcCLB.503819.20	DNA-directed_RNA_polymerase_III_subunit_putative	-1.87747	2.03e-07	4.53e-07	2.08e-06	4.75158	1	1	http://tritrypdb.org/gene/TcCLB.503819.20
TcCLB.508607.70	trans-sialidase_(pseudogene)_putative	-1.87654	0.00581791	0.00258905	0.0118776	1.99431	1	1	http://tritrypdb.org/gene/TcCLB.508607.70
TcCLB.511589.70	ADP-ribosylation_factor_GTPase_activating_protein_putative	-1.86584	6.58e-12	1e-10	4.59e-10	6.13836	1	1	http://tritrypdb.org/gene/TcCLB.511589.70
TcCLB.469785.40	RNA-binding_protein_putative	-1.86342	4.84e-08	1.36e-07	6.24e-07	4.84409	1	1	http://tritrypdb.org/gene/TcCLB.469785.40
TcCLB.506367.10	isovaleryl-coA_dehydrogenase_putative	-1.85916	5.27e-07	1.01e-06	4.63e-06	4.72635	1	1	http://tritrypdb.org/gene/TcCLB.506367.10
TcCLB.511071.202	hypothetical_protein_conserved	-1.85753	0.00529844	0.00237901	0.010914	2.04679	1	1	http://tritrypdb.org/gene/TcCLB.511071.202
TcCLB.506495.40	hypothetical_protein	-1.85716	1.09e-11	1.48e-10	6.81e-10	8.36103	1	1	http://tritrypdb.org/gene/TcCLB.506495.40
TcCLB.510595.58	hypothetical_protein_conserved	-1.85332	5.13e-07	9.85e-07	4.52e-06	4.83203	1	1	http://tritrypdb.org/gene/TcCLB.510595.58
TcCLB.507143.90	hypothetical_protein	-1.85207	0.0347136	0.0123996	0.0568847	0.102524	1	0	http://tritrypdb.org/gene/TcCLB.507143.90
TcCLB.506979.30	hypothetical_protein	-1.83603	0.0186827	0.00718544	0.0329641	2.93971	1	1	http://tritrypdb.org/gene/TcCLB.506979.30
TcCLB.506825.200	hypothetical_protein	-1.83098	9.17e-13	2.09e-11	9.6e-11	8.89583	1	1	http://tritrypdb.org/gene/TcCLB.506825.200
TcCLB.505807.220	ribosomal_RNA_adenine_dimethylase_family_protein_putative	-1.81657	3.03e-12	5.39e-11	2.47e-10	6.80358	1	1	http://tritrypdb.org/gene/TcCLB.505807.220
TcCLB.510149.70	hypothetical_protein_conserved	-1.81452	4.76e-13	1.39e-11	6.38e-11	9.07739	1	1	http://tritrypdb.org/gene/TcCLB.510149.70
TcCLB.511711.30	hypothetical_protein_conserved	-1.80989	7.65e-08	1.99e-07	9.11e-07	5.99596	1	1	http://tritrypdb.org/gene/TcCLB.511711.30
TcCLB.509951.10	nucleolar_protein_putative	-1.8096	6.86e-08	1.81e-07	8.29e-07	5.46189	1	1	http://tritrypdb.org/gene/TcCLB.509951.10
TcCLB.503447.60	beta_galactofuranosyl_glycosyltransferase_putative	-1.8087	0.0300685	0.0109165	0.0500807	0.315723	1	0	http://tritrypdb.org/gene/TcCLB.503447.60
TcCLB.506481.20	hypothetical_protein_conserved	-1.8026	1.03e-13	6e-12	2.75e-11	8.50814	1	1	http://tritrypdb.org/gene/TcCLB.506481.20
TcCLB.506931.4	hypothetical_protein_conserved	-1.80134	1.11e-07	2.71e-07	1.24e-06	5.61196	1	1	http://tritrypdb.org/gene/TcCLB.506931.4
TcCLB.508163.150	elongation_factor_1-gamma_(EF-1-gamma)_putative	-1.80085	0.000525987	0.000325188	0.00149184	2.76243	1	1	http://tritrypdb.org/gene/TcCLB.508163.150
TcCLB.505807.209	hypothetical_protein_conserved	-1.8002	1.25e-05	1.39e-05	6.38e-05	4.73274	1	1	http://tritrypdb.org/gene/TcCLB.505807.209
TcCLB.506529.80	hypothetical_protein_conserved	-1.79778	8.2e-09	3.03e-08	1.39e-07	8.0017	1	1	http://tritrypdb.org/gene/TcCLB.506529.80
TcCLB.504099.30	hypothetical_protein_conserved_(pseudogene)	-1.79584	0.0061284	0.00271452	0.0124532	2.52415	1	1	http://tritrypdb.org/gene/TcCLB.504099.30
TcCLB.507037.20	RNA-binding_protein_putative	-1.7949	2.26e-09	1.03e-08	4.75e-08	6.7903	1	1	http://tritrypdb.org/gene/TcCLB.507037.20
TcCLB.506795.80	proline_racemaseB-cell_mitogen_precursor_putative	-1.78827	2.29e-06	3.42e-06	1.57e-05	6.35696	1	1	http://tritrypdb.org/gene/TcCLB.506795.80
TcCLB.507711.100	procyclic_form_surface_glycoprotein_putative	-1.78307	7.15e-10	4.08e-09	1.87e-08	7.82072	1	1	http://tritrypdb.org/gene/TcCLB.507711.100
TcCLB.510073.75	hypothetical_protein_conserved	-1.78056	0.0388223	0.013685	0.0627817	1.5034	1	0	http://tritrypdb.org/gene/TcCLB.510073.75
TcCLB.503955.40	trans-sialidase_putative	-1.77992	2.15e-08	6.87e-08	3.15e-07	6.55979	1	1	http://tritrypdb.org/gene/TcCLB.503955.40
TcCLB.509831.40	hypothetical_protein_conserved	-1.77889	1.43e-09	7.18e-09	3.3e-08	5.82777	1	1	http://tritrypdb.org/gene/TcCLB.509831.40
TcCLB.507521.110	pumilio/PUF_RNA_binding_protein_5_putative	-1.77521	3.15e-10	2.08e-09	9.56e-09	7.28682	1	1	http://tritrypdb.org/gene/TcCLB.507521.110
TcCLB.504011.30	surface_protease_GP63_(pseudogene)_putative	-1.76931	2.56e-06	3.76e-06	1.73e-05	3.70131	1	1	http://tritrypdb.org/gene/TcCLB.504011.30
TcCLB.511421.170	hypothetical_protein_conserved	-1.76858	1.43e-07	3.36e-07	1.54e-06	6.02238	1	1	http://tritrypdb.org/gene/TcCLB.511421.170
TcCLB.507925.30	hypothetical_protein_conserved	-1.76719	2.42e-06	3.6e-06	1.65e-05	4.8171	1	1	http://tritrypdb.org/gene/TcCLB.507925.30
TcCLB.509965.390	amastin_putative	-1.76711	3.18e-08	9.55e-08	4.38e-07	4.7866	1	1	http://tritrypdb.org/gene/TcCLB.509965.390
TcCLB.509551.60	hypothetical_protein_conserved	-1.7648	0.000274498	0.000186435	0.000855293	4.15368	1	1	http://tritrypdb.org/gene/TcCLB.509551.60
TcCLB.506759.31	surface_protease_GP63_(pseudogene)_putative	-1.76318	0.120935	0.0368345	0.168983	-0.558981	1	0	http://tritrypdb.org/gene/TcCLB.506759.31
TcCLB.511439.60	hypothetical_protein_conserved	-1.75755	1.05e-07	2.57e-07	1.18e-06	5.43564	1	1	http://tritrypdb.org/gene/TcCLB.511439.60
TcCLB.510721.31	surface_protease_GP63_putative	-1.75748	0.000662169	0.000393907	0.0018071	2.96519	1	1	http://tritrypdb.org/gene/TcCLB.510721.31
TcCLB.510175.110	trans-sialidase_(pseudogene)_putative	-1.757	1.28e-06	2.12e-06	9.73e-06	3.91657	1	1	http://tritrypdb.org/gene/TcCLB.510175.110
TcCLB.506265.209	hypothetical_protein_conserved	-1.75535	7.87e-06	9.45e-06	4.34e-05	4.02534	1	1	http://tritrypdb.org/gene/TcCLB.506265.209
TcCLB.510345.30	hypothetical_protein	-1.75322	1.23e-05	1.37e-05	6.27e-05	4.21592	1	1	http://tritrypdb.org/gene/TcCLB.510345.30
TcCLB.511529.50	hypothetical_protein_conserved	-1.74848	7.41e-05	6.17e-05	0.000283099	4.53021	1	1	http://tritrypdb.org/gene/TcCLB.511529.50
TcCLB.510877.190	hypothetical_protein_conserved	-1.74808	2.26e-05	2.27e-05	0.000103997	3.90868	1	1	http://tritrypdb.org/gene/TcCLB.510877.190
TcCLB.511217.190	hypothetical_protein_conserved	-1.74577	1.06e-05	1.21e-05	5.56e-05	4.23714	1	1	http://tritrypdb.org/gene/TcCLB.511217.190
TcCLB.510377.439	mucin_TcMUCII_putative	-1.74552	0.0439112	0.0152201	0.0698242	-0.80855	1	0	http://tritrypdb.org/gene/TcCLB.510377.439
TcCLB.503767.5	potassium_voltage-gated_channel_putative	-1.74536	4.91e-05	4.35e-05	0.000199534	4.43662	1	1	http://tritrypdb.org/gene/TcCLB.503767.5
TcCLB.511053.10	hypothetical_protein_conserved	-1.74063	1.08e-09	5.69e-09	2.61e-08	5.8473	1	1	http://tritrypdb.org/gene/TcCLB.511053.10
TcCLB.511349.40	hypothetical_protein_conserved	-1.739	0.0145039	0.00575087	0.0263829	0.90435	1	1	http://tritrypdb.org/gene/TcCLB.511349.40
TcCLB.506767.110	mucin-associated_surface_protein_(MASP)_putative	-1.73818	0.0577685	0.0193044	0.0885614	-0.538005	1	0	http://tritrypdb.org/gene/TcCLB.506767.110
TcCLB.511437.40	expression_site-associated_gene_(ESAG-like)_protein_putative	-1.73772	0.0562298	0.0188704	0.0865704	1.36818	1	0	http://tritrypdb.org/gene/TcCLB.511437.40
TcCLB.510939.9	hypothetical_protein_conserved	-1.73635	4.73e-07	9.24e-07	4.24e-06	4.80033	1	1	http://tritrypdb.org/gene/TcCLB.510939.9
TcCLB.507689.10	dihydrouridine_synthase_(Dus_pseudogene)_putative	-1.73336	0.00129863	0.000703178	0.00322592	4.85982	1	1	http://tritrypdb.org/gene/TcCLB.507689.10
TcCLB.503579.60	hypothetical_protein	-1.73117	4.22e-11	4.15e-10	1.9e-09	8.1965	1	1	http://tritrypdb.org/gene/TcCLB.503579.60
TcCLB.420293.31	hypothetical_protein	-1.73035	0.140507	0.0419499	0.19245	0.539847	1	0	http://tritrypdb.org/gene/TcCLB.420293.31
TcCLB.508439.40	hypothetical_protein	-1.72854	0.126059	0.0381811	0.17516	-1.29246	1	0	http://tritrypdb.org/gene/TcCLB.508439.40
TcCLB.507275.54	no_Fct	-1.72771	0.0222338	0.00837329	0.0384135	0.89525	1	1	http://tritrypdb.org/gene/TcCLB.507275.54
TcCLB.504137.140	hypothetical_protein_conserved	-1.71971	1.96e-09	9.1e-09	4.17e-08	6.22767	1	1	http://tritrypdb.org/gene/TcCLB.504137.140
TcCLB.507537.20	cysteine_peptidase_putativecysteine_peptidase_clan_CA_family_C1_cathepsin_L-like_putative	-1.71799	0.000984806	0.000552126	0.00253295	9.67158	1	1	http://tritrypdb.org/gene/TcCLB.507537.20
TcCLB.511695.10	hypothetical_protein	-1.70969	0.0111012	0.00455285	0.0208868	2.46353	1	1	http://tritrypdb.org/gene/TcCLB.511695.10
TcCLB.507077.9	hypothetical_protein_conserved	-1.70872	1.48e-10	1.16e-09	5.3e-09	6.36517	1	1	http://tritrypdb.org/gene/TcCLB.507077.9
TcCLB.438147.18	hypothetical_protein_conserved	-1.70859	1.61e-05	1.71e-05	7.83e-05	4.36586	1	1	http://tritrypdb.org/gene/TcCLB.438147.18
TcCLB.510013.50	trans-sialidase_putative	-1.70795	0.0114693	0.00469035	0.0215176	2.20434	1	1	http://tritrypdb.org/gene/TcCLB.510013.50
TcCLB.511577.44	hypothetical_protein_conserved	-1.70459	2.96e-07	6.18e-07	2.83e-06	4.57651	1	1	http://tritrypdb.org/gene/TcCLB.511577.44
TcCLB.509233.239	hypothetical_protein_conserved	-1.69883	1.97e-06	3.02e-06	1.38e-05	3.66921	1	1	http://tritrypdb.org/gene/TcCLB.509233.239
TcCLB.507817.50	hypothetical_protein_conserved	-1.69866	3.04e-10	2.03e-09	9.31e-09	6.19786	1	1	http://tritrypdb.org/gene/TcCLB.507817.50
TcCLB.509165.34	ribosomal_P_protein_AGP2beta-1_putative	-1.69865	1.82e-06	2.81e-06	1.29e-05	4.37214	1	1	http://tritrypdb.org/gene/TcCLB.509165.34
TcCLB.510285.20	hypothetical_protein_conserved	-1.69707	2.05e-11	2.45e-10	1.12e-09	7.74553	1	1	http://tritrypdb.org/gene/TcCLB.510285.20
TcCLB.509499.10	cyclophilin_putativePPIase_putativerotamase_putativepeptidyl-prolyl_cis-trans_isomerase_putative	-1.69625	1.77e-10	1.33e-09	6.08e-09	7.09622	1	1	http://tritrypdb.org/gene/TcCLB.509499.10
TcCLB.503529.10	hypothetical_protein_conserved	-1.69563	5.17e-05	4.55e-05	0.000208937	3.13758	1	1	http://tritrypdb.org/gene/TcCLB.503529.10
TcCLB.506495.50	hypothetical_protein	-1.6928	8.44e-10	4.65e-09	2.13e-08	7.3083	1	1	http://tritrypdb.org/gene/TcCLB.506495.50
TcCLB.507735.10	hypothetical_protein_conserved	-1.69125	1.13e-05	1.28e-05	5.87e-05	4.35566	1	1	http://tritrypdb.org/gene/TcCLB.507735.10
TcCLB.508377.9	fucose_kinase_putative	-1.68977	5.45e-10	3.21e-09	1.47e-08	6.47211	1	1	http://tritrypdb.org/gene/TcCLB.508377.9
TcCLB.511737.6	hypothetical_protein_conserved	-1.68527	5.38e-08	1.47e-07	6.76e-07	5.48875	1	1	http://tritrypdb.org/gene/TcCLB.511737.6
TcCLB.506127.70	hypothetical_protein	-1.68066	0.0423946	0.014773	0.067773	1.70615	1	0	http://tritrypdb.org/gene/TcCLB.506127.70
TcCLB.503761.30	mucin_TcMUCII_putative	-1.67777	0.00704259	0.00306411	0.014057	2.41248	1	1	http://tritrypdb.org/gene/TcCLB.503761.30
TcCLB.507711.50	hypothetical_protein_conserved	-1.6743	3.54e-06	4.93e-06	2.26e-05	5.03935	1	1	http://tritrypdb.org/gene/TcCLB.507711.50
TcCLB.506937.20	hypothetical_protein_conserved	-1.67334	3.43e-06	4.82e-06	2.21e-05	4.50093	1	1	http://tritrypdb.org/gene/TcCLB.506937.20
TcCLB.506731.10	hypothetical_protein	-1.67144	0.00149046	0.000790416	0.00362613	3.61723	1	1	http://tritrypdb.org/gene/TcCLB.506731.10
TcCLB.510207.35	mucin_TcMUCII_(pseudogene)_putative	-1.66773	0.10444	0.0323856	0.148573	0.46738	1	0	http://tritrypdb.org/gene/TcCLB.510207.35
TcCLB.504077.60	hypothetical_protein_conserved_(pseudogene)	-1.66164	0.000336198	0.000221162	0.00101461	3.053	1	1	http://tritrypdb.org/gene/TcCLB.504077.60
TcCLB.508041.80	protein_transport_protein_Sec31_putative_(pseudogene)	-1.65575	1.11e-11	1.5e-10	6.89e-10	8.49056	1	1	http://tritrypdb.org/gene/TcCLB.508041.80
TcCLB.510149.130	hypothetical_protein_conserved	-1.65476	5.19e-08	1.43e-07	6.56e-07	5.66831	1	1	http://tritrypdb.org/gene/TcCLB.510149.130
TcCLB.506947.70	hypothetical_protein_conserved	-1.65446	4.85e-08	1.36e-07	6.25e-07	5.29124	1	1	http://tritrypdb.org/gene/TcCLB.506947.70
TcCLB.509977.15	surface_protease_GP63_(pseudogene)_putative	-1.65409	0.088825	0.0280548	0.128705	0.42629	1	0	http://tritrypdb.org/gene/TcCLB.509977.15
TcCLB.510249.30	hypothetical_protein_conserved	-1.65006	0.000138012	0.000104504	0.000479424	4.2494	1	1	http://tritrypdb.org/gene/TcCLB.510249.30
TcCLB.504075.3	calmodulin_putative	-1.64859	0.000765261	0.000445465	0.00204363	3.1782	1	1	http://tritrypdb.org/gene/TcCLB.504075.3
TcCLB.507997.80	hypothetical_protein_conserved	-1.64786	3.13e-06	4.46e-06	2.05e-05	4.50253	1	1	http://tritrypdb.org/gene/TcCLB.507997.80
TcCLB.479721.10	hypothetical_protein_conserved_(pseudogene)	-1.64739	0.000153899	0.00011493	0.000527258	2.94086	1	1	http://tritrypdb.org/gene/TcCLB.479721.10
TcCLB.506601.11	hypothetical_protein_conserved_(pseudogene)	-1.64701	0.0596649	0.019848	0.0910551	-0.230239	1	0	http://tritrypdb.org/gene/TcCLB.506601.11
TcCLB.506513.14	hypothetical_protein_conserved	-1.64398	2.29e-07	4.98e-07	2.29e-06	4.65657	1	1	http://tritrypdb.org/gene/TcCLB.506513.14
TcCLB.508323.94	cyclophilin_putativePPIase_putativerotamase_putativepeptidyl-prolyl_cis-trans_isomerase_putative	-1.64162	5.09e-06	6.63e-06	3.04e-05	4.56528	1	1	http://tritrypdb.org/gene/TcCLB.508323.94
TcCLB.508539.10	hypothetical_protein_conserved	-1.64083	8.83e-05	7.13e-05	0.000326949	4.13608	1	1	http://tritrypdb.org/gene/TcCLB.508539.10
TcCLB.503821.10	DNA-directed_RNA_polymerase_subunit_putative	-1.64001	8.65e-08	2.21e-07	1.01e-06	5.26745	1	1	http://tritrypdb.org/gene/TcCLB.503821.10
TcCLB.509649.20	hypothetical_protein	-1.63983	1.69e-09	8.17e-09	3.75e-08	6.7918	1	1	http://tritrypdb.org/gene/TcCLB.509649.20
TcCLB.510911.58	retrotransposon_hot_spot_protein_(RHS_pseudogene)_putative	-1.63625	0.161872	0.0474648	0.217751	-1.06682	1	0	http://tritrypdb.org/gene/TcCLB.510911.58
TcCLB.511577.4	CLC-type_chloride_channel_putative	-1.63463	1.79e-06	2.77e-06	1.27e-05	4.37076	1	1	http://tritrypdb.org/gene/TcCLB.511577.4
TcCLB.507709.13	no_Fct	-1.63265	0.0754736	0.024416	0.112011	-0.930447	1	0	http://tritrypdb.org/gene/TcCLB.507709.13
TcCLB.509633.10	hypothetical_protein_conserved	-1.63193	7.6e-10	4.28e-09	1.96e-08	5.9764	1	1	http://tritrypdb.org/gene/TcCLB.509633.10
TcCLB.506125.30	phosphoglycerate_kinase_putative	-1.62902	0.00560974	0.00250374	0.0114862	2.73565	1	1	http://tritrypdb.org/gene/TcCLB.506125.30
TcCLB.503745.25	hypothetical_protein_conserved	-1.62787	2.26e-05	2.27e-05	0.000103997	4.44395	1	1	http://tritrypdb.org/gene/TcCLB.503745.25
TcCLB.503613.40	pterin-4-alpha-carbinolamine_dehydratase_putative	-1.6272	5.31e-09	2.1e-08	9.62e-08	5.93613	1	1	http://tritrypdb.org/gene/TcCLB.503613.40
TcCLB.511621.259	hypothetical_protein_conserved	-1.62704	0.00207316	0.00105565	0.00484292	5.20231	1	1	http://tritrypdb.org/gene/TcCLB.511621.259
TcCLB.511575.90	hypothetical_protein	-1.62366	7.25e-06	8.85e-06	4.06e-05	4.6913	1	1	http://tritrypdb.org/gene/TcCLB.511575.90
TcCLB.503747.10	tyrosine_aminotransferase_putative	-1.62311	7.77e-06	9.36e-06	4.3e-05	4.78292	1	1	http://tritrypdb.org/gene/TcCLB.503747.10
TcCLB.506147.130	hypothetical_protein_conserved	-1.61669	8.16e-07	1.45e-06	6.66e-06	5.1276	1	1	http://tritrypdb.org/gene/TcCLB.506147.130
TcCLB.462761.4	hypothetical_protein_conserved	-1.61611	0.00123328	0.000671941	0.00308261	3.4162	1	1	http://tritrypdb.org/gene/TcCLB.462761.4
TcCLB.511303.90	hypothetical_protein_conserved	-1.61523	2.96e-10	1.98e-09	9.08e-09	6.76506	1	1	http://tritrypdb.org/gene/TcCLB.511303.90
TcCLB.508307.170	60S_acidic_ribosomal_protein_putative	-1.61249	4.63e-09	1.88e-08	8.62e-08	5.74106	1	1	http://tritrypdb.org/gene/TcCLB.508307.170
TcCLB.507669.84	ATP-dependent_DEAD/H_RNA_helicase_putative	-1.61175	2.42e-10	1.72e-09	7.9e-09	7.40755	1	1	http://tritrypdb.org/gene/TcCLB.507669.84
TcCLB.506127.40	hypothetical_protein_conserved	-1.61137	0.000534976	0.000329941	0.00151365	3.65418	1	1	http://tritrypdb.org/gene/TcCLB.506127.40
TcCLB.510255.4	hypothetical_protein_conserved	-1.60745	4.09e-06	5.55e-06	2.55e-05	4.03228	1	1	http://tritrypdb.org/gene/TcCLB.510255.4
TcCLB.506127.30	phenylalanyl-tRNA_synthetase_putative	-1.60317	0.000259507	0.000177788	0.000815626	4.58531	1	1	http://tritrypdb.org/gene/TcCLB.506127.30
TcCLB.509777.21	hypothetical_protein	-1.60104	4.61e-07	9.07e-07	4.16e-06	4.4563	1	1	http://tritrypdb.org/gene/TcCLB.509777.21
TcCLB.507611.142	hypothetical_protein_(pseudogene)	-1.59821	0.00349234	0.0016573	0.00760306	3.11574	1	1	http://tritrypdb.org/gene/TcCLB.507611.142
TcCLB.506205.49	hypothetical_protein_conserved	-1.59684	0.000228613	0.000159595	0.000732163	3.81594	1	1	http://tritrypdb.org/gene/TcCLB.506205.49
TcCLB.511107.41	ATP-dependent_Clp_protease_subunit_heat_shock_protein_100_(HSP100)_putative	-1.59441	1.35e-08	4.62e-08	2.12e-07	6.90381	1	1	http://tritrypdb.org/gene/TcCLB.511107.41
TcCLB.510747.140	hypothetical_protein_conserved	-1.59348	3.22e-09	1.41e-08	6.45e-08	5.65115	1	1	http://tritrypdb.org/gene/TcCLB.510747.140
TcCLB.506773.130	pumilio-repeat_RNA-binding_protein_putative	-1.59166	1.03e-10	8.65e-10	3.97e-09	7.82237	1	1	http://tritrypdb.org/gene/TcCLB.506773.130
TcCLB.509645.30	hypothetical_protein_conserved	-1.59025	0.0854926	0.0271413	0.124514	2.17353	1	0	http://tritrypdb.org/gene/TcCLB.509645.30
TcCLB.506755.230	hypothetical_protein_conserved	-1.58976	3.6e-09	1.53e-08	7.02e-08	5.60088	1	1	http://tritrypdb.org/gene/TcCLB.506755.230
TcCLB.507507.49	hypothetical_protein_conserved	-1.58554	3.07e-05	2.93e-05	0.000134533	3.9772	1	1	http://tritrypdb.org/gene/TcCLB.507507.49
TcCLB.403789.9	DNA-directed_rna_polymerase_I_largest_subunit_putative	-1.5846	2.9e-07	6.09e-07	2.79e-06	4.6011	1	1	http://tritrypdb.org/gene/TcCLB.403789.9
TcCLB.507529.58	hypothetical_protein_conserved	-1.58253	0.043341	0.0150453	0.0690223	2.0542	1	0	http://tritrypdb.org/gene/TcCLB.507529.58
TcCLB.503833.69	ribosome_biogenesis_protein_putative	-1.58149	2.4e-06	3.57e-06	1.64e-05	5.99894	1	1	http://tritrypdb.org/gene/TcCLB.503833.69
TcCLB.507485.80	hypothetical_protein_conserved	-1.58091	1.13e-05	1.28e-05	5.87e-05	4.91825	1	1	http://tritrypdb.org/gene/TcCLB.507485.80
TcCLB.511395.14	hypothetical_protein_conserved	-1.5805	7.83e-07	1.4e-06	6.44e-06	4.69925	1	1	http://tritrypdb.org/gene/TcCLB.511395.14
TcCLB.510763.109	rRNA_processing_protein_putative	-1.57998	4.5e-10	2.75e-09	1.26e-08	6.09848	1	1	http://tritrypdb.org/gene/TcCLB.510763.109
TcCLB.438059.10	serine/threonine-protein_phosphatase_PP1_alpha	-1.57938	0.0011909	0.000651964	0.00299096	3.58083	1	1	http://tritrypdb.org/gene/TcCLB.438059.10
TcCLB.503981.90	DNA_helicase_putative	-1.57384	4.71e-05	4.2e-05	0.000192726	4.0091	1	1	http://tritrypdb.org/gene/TcCLB.503981.90
TcCLB.510029.10	hypothetical_protein_conserved_(pseudogene)	-1.57294	1.02e-07	2.52e-07	1.15e-06	5.8616	1	1	http://tritrypdb.org/gene/TcCLB.510029.10
TcCLB.510741.208	no_Fct	-1.57189	0.157427	0.0463162	0.212482	-0.437925	1	0	http://tritrypdb.org/gene/TcCLB.510741.208
TcCLB.504431.90	U2_small_nuclear_ribonucleoprotein_B_putative	-1.56945	6.51e-07	1.2e-06	5.5e-06	5.02294	1	1	http://tritrypdb.org/gene/TcCLB.504431.90
TcCLB.510285.140	hypothetical_protein_conserved	-1.56852	4.65e-05	4.16e-05	0.000190795	3.52548	1	1	http://tritrypdb.org/gene/TcCLB.510285.140
TcCLB.508951.4	protein_kinase_putative	-1.56488	3.07e-05	2.93e-05	0.000134533	4.06446	1	1	http://tritrypdb.org/gene/TcCLB.508951.4
TcCLB.509137.10	hypothetical_protein	-1.56351	0.0815481	0.0260486	0.119501	0.523439	1	0	http://tritrypdb.org/gene/TcCLB.509137.10
TcCLB.506579.129	hypothetical_protein_conserved	-1.5634	0.000295982	0.000198135	0.00090897	4.15224	1	1	http://tritrypdb.org/gene/TcCLB.506579.129
TcCLB.509349.10	trans-sialidase_(pseudogene)_putative	-1.56135	4.09e-06	5.55e-06	2.55e-05	4.05293	1	1	http://tritrypdb.org/gene/TcCLB.509349.10
TcCLB.509231.5	hypothetical_protein_conserved	-1.56019	0.00118325	0.000648469	0.00297493	3.32008	1	1	http://tritrypdb.org/gene/TcCLB.509231.5
TcCLB.457109.9	dispersed_gene_family_protein_1_(DGF-1)_putative	-1.55884	0.100637	0.0313385	0.143769	0.859191	1	0	http://tritrypdb.org/gene/TcCLB.457109.9
TcCLB.503981.80	hypothetical_protein_conserved	-1.55816	3.41e-11	3.64e-10	1.67e-09	8.43179	1	1	http://tritrypdb.org/gene/TcCLB.503981.80
TcCLB.509465.10	hypothetical_protein_conserved	-1.5577	1.5e-05	1.61e-05	7.38e-05	3.88007	1	1	http://tritrypdb.org/gene/TcCLB.509465.10
TcCLB.511693.60	hypothetical_protein_conserved	-1.55636	7.12e-06	8.73e-06	4e-05	5.15396	1	1	http://tritrypdb.org/gene/TcCLB.511693.60
TcCLB.504215.59	hypothetical_protein_conserved	-1.55534	6.71e-10	3.85e-09	1.76e-08	7.1689	1	1	http://tritrypdb.org/gene/TcCLB.504215.59
TcCLB.504103.80	hypothetical_protein_conserved	-1.55447	6.44e-11	5.81e-10	2.66e-09	7.01289	1	1	http://tritrypdb.org/gene/TcCLB.504103.80
TcCLB.509341.10	hypothetical_protein_conserved	-1.55082	3.32e-12	5.69e-11	2.61e-10	7.41491	1	1	http://tritrypdb.org/gene/TcCLB.509341.10
TcCLB.506623.30	hypothetical_protein	-1.5495	0.0112223	0.00459841	0.0210958	2.80235	1	1	http://tritrypdb.org/gene/TcCLB.506623.30
TcCLB.507737.40	hypothetical_protein_conserved	-1.54849	0.00106261	0.00058937	0.00270381	2.79996	1	1	http://tritrypdb.org/gene/TcCLB.507737.40
TcCLB.509829.20	isovaleryl-coA_dehydrogenase_putative	-1.54684	1.68e-06	2.64e-06	1.21e-05	5.52948	1	1	http://tritrypdb.org/gene/TcCLB.509829.20
TcCLB.509767.170	hypothetical_protein_conserved	-1.54398	1.56e-11	1.97e-10	9.03e-10	8.20375	1	1	http://tritrypdb.org/gene/TcCLB.509767.170
TcCLB.510841.30	hypothetical_protein	-1.54367	0.00071428	0.000419274	0.00192347	3.62872	1	1	http://tritrypdb.org/gene/TcCLB.510841.30
TcCLB.509551.64	small_nuclear_ribonucleoprotein_Sm-F_putative	-1.53958	8.59e-05	6.97e-05	0.000319545	4.68681	1	1	http://tritrypdb.org/gene/TcCLB.509551.64
TcCLB.508307.190	hypothetical_protein_conserved	-1.53922	0.0782759	0.0251797	0.115515	1.77803	1	0	http://tritrypdb.org/gene/TcCLB.508307.190
TcCLB.508781.10	structural_maintenance_of_chromosome_protein_4_(pseudogene)_putative	-1.53763	2.59e-05	2.53e-05	0.000116133	4.43377	1	1	http://tritrypdb.org/gene/TcCLB.508781.10
TcCLB.508719.30	hypothetical_protein_conserved	-1.53703	1.4e-07	3.32e-07	1.52e-06	9.34029	1	1	http://tritrypdb.org/gene/TcCLB.508719.30
TcCLB.503953.50	hypothetical_protein_conserved	-1.53183	1.25e-11	1.65e-10	7.57e-10	7.60537	1	1	http://tritrypdb.org/gene/TcCLB.503953.50
TcCLB.510535.10	hypothetical_protein_conserved	-1.53112	8.81e-06	1.04e-05	4.75e-05	6.27473	1	1	http://tritrypdb.org/gene/TcCLB.510535.10
TcCLB.509965.429	hypothetical_protein_conserved	-1.52981	0.000432896	0.00027563	0.00126449	4.31698	1	1	http://tritrypdb.org/gene/TcCLB.509965.429
TcCLB.508039.90	phosphoinositide-specific_phospholipase_C_(pseudogene)_putativephosphoinositide-specific_phospholipase_C_putative_frameshift	-1.52888	0.0411882	0.0144099	0.066107	1.63728	1	0	http://tritrypdb.org/gene/TcCLB.508039.90
TcCLB.506181.120	hypothetical_protein_conserved	-1.52773	7.74e-05	6.4e-05	0.000293486	4.50097	1	1	http://tritrypdb.org/gene/TcCLB.506181.120
TcCLB.509815.5	trans-sialidase_putative	-1.52742	0.0703298	0.0229718	0.105386	1.41932	1	0	http://tritrypdb.org/gene/TcCLB.509815.5
TcCLB.511421.217	hypothetical_protein_conserved	-1.52724	0.000226032	0.000158327	0.000726345	4.8909	1	1	http://tritrypdb.org/gene/TcCLB.511421.217
TcCLB.506743.100	hypothetical_protein_conserved	-1.52669	0.000123024	9.46e-05	0.000433985	4.66059	1	1	http://tritrypdb.org/gene/TcCLB.506743.100
TcCLB.510517.80	hypothetical_protein_conserved	-1.52652	8.15e-05	6.67e-05	0.000305845	4.73559	1	1	http://tritrypdb.org/gene/TcCLB.510517.80
TcCLB.504425.60	NADP-dependent_alcohol_hydrogenase_putative	-1.52624	5.69e-07	1.07e-06	4.92e-06	6.65106	1	1	http://tritrypdb.org/gene/TcCLB.504425.60
TcCLB.506949.10	DNA-directed_rna_polymerase_I_largest_subunit_putative	-1.5251	1.26e-05	1.39e-05	6.4e-05	4.39985	1	1	http://tritrypdb.org/gene/TcCLB.506949.10
TcCLB.510565.170	hypothetical_protein_conserved	-1.52234	1.3e-05	1.43e-05	6.55e-05	4.014	1	1	http://tritrypdb.org/gene/TcCLB.510565.170
TcCLB.511527.82	hypothetical_protein_conserved	-1.52084	1.5e-06	2.41e-06	1.11e-05	4.49214	1	1	http://tritrypdb.org/gene/TcCLB.511527.82
TcCLB.438147.9	hypothetical_protein_conserved	-1.52073	1.27e-06	2.1e-06	9.64e-06	5.57135	1	1	http://tritrypdb.org/gene/TcCLB.438147.9
TcCLB.503689.20	hypothetical_protein_conserved	-1.51975	0.000117708	9.11e-05	0.000417911	4.51775	1	1	http://tritrypdb.org/gene/TcCLB.503689.20
TcCLB.510205.60	hypothetical_protein	-1.51844	0.099588	0.0310627	0.142504	0.524181	1	0	http://tritrypdb.org/gene/TcCLB.510205.60
TcCLB.466007.9	dispersed_gene_family_protein_1_(DGF-1)_putative	-1.51636	0.139337	0.041666	0.191148	1.33723	1	0	http://tritrypdb.org/gene/TcCLB.466007.9
TcCLB.506625.140	hypothetical_protein_conserved	-1.5144	1.89e-10	1.41e-09	6.45e-09	5.86577	1	1	http://tritrypdb.org/gene/TcCLB.506625.140
TcCLB.511417.129	hypothetical_protein_conserved	-1.51386	2.25e-06	3.38e-06	1.55e-05	4.37713	1	1	http://tritrypdb.org/gene/TcCLB.511417.129
TcCLB.510603.20	hypothetical_protein_conserved	-1.51306	3.93e-08	1.14e-07	5.25e-07	5.48604	1	1	http://tritrypdb.org/gene/TcCLB.510603.20
TcCLB.510535.30	hypothetical_protein	-1.51028	1.34e-09	6.81e-09	3.12e-08	5.98271	1	1	http://tritrypdb.org/gene/TcCLB.510535.30
TcCLB.507641.260	chaperonin_HSP60_mitochondrial_precursor_(pseudogene)groELprotein_frameshiftheat_shock_protein_60_frameshiftchaperonin_HSP60_mitochondrial_precursor_frameshift	-1.50837	0.000952105	0.000536297	0.00246033	10.8917	1	1	http://tritrypdb.org/gene/TcCLB.507641.260
TcCLB.507923.20	U3_small_nuclear_ribonucleoprotein_(snRNP)_putative	-1.50799	0.00035069	0.000229372	0.00105227	8.00073	1	1	http://tritrypdb.org/gene/TcCLB.507923.20
TcCLB.506625.80	cAMP-specific_phosphodiesterase_putative	-1.50733	1.21e-07	2.92e-07	1.34e-06	7.14711	1	1	http://tritrypdb.org/gene/TcCLB.506625.80
TcCLB.503419.10	hypothetical_protein	-1.50204	0.144058	0.0428082	0.196388	-0.150852	1	0	http://tritrypdb.org/gene/TcCLB.503419.10
TcCLB.506517.110	hypothetical_protein_conserved	-1.50161	3.51e-06	4.9e-06	2.25e-05	5.03175	1	1	http://tritrypdb.org/gene/TcCLB.506517.110
TcCLB.510283.110	hypothetical_protein_conserved	-1.49966	5.12e-08	1.42e-07	6.51e-07	5.06422	1	1	http://tritrypdb.org/gene/TcCLB.510283.110
TcCLB.511537.8	ABC_transporter_putative	-1.49918	1.84e-07	4.15e-07	1.9e-06	5.08104	1	1	http://tritrypdb.org/gene/TcCLB.511537.8
TcCLB.510241.110	hypothetical_protein_conserved	-1.49899	3.49e-11	3.7e-10	1.7e-09	8.73585	1	1	http://tritrypdb.org/gene/TcCLB.510241.110
TcCLB.510297.60	zinc_transporter_putative	-1.49858	1.27e-10	1.02e-09	4.68e-09	6.76267	1	1	http://tritrypdb.org/gene/TcCLB.510297.60
TcCLB.504035.80	hypothetical_protein_conserved	-1.49854	1.25e-06	2.08e-06	9.55e-06	4.77129	1	1	http://tritrypdb.org/gene/TcCLB.504035.80
TcCLB.504129.10	hypothetical_protein_conserved	-1.49849	3.79e-05	3.53e-05	0.000161852	4.68654	1	1	http://tritrypdb.org/gene/TcCLB.504129.10
TcCLB.503653.104	hypothetical_protein_conserved	-1.49551	8.1e-06	9.67e-06	4.43e-05	3.28132	1	1	http://tritrypdb.org/gene/TcCLB.503653.104
TcCLB.511711.40	hypothetical_protein_conserved	-1.49544	4.5e-08	1.27e-07	5.84e-07	5.31356	1	1	http://tritrypdb.org/gene/TcCLB.511711.40
TcCLB.509979.281	elongation_factor_1-gamma_(EF-1-gamma_pseudogene)_putative	-1.49475	0.00145139	0.000774132	0.00355143	3.28118	1	1	http://tritrypdb.org/gene/TcCLB.509979.281
TcCLB.509551.40	hypothetical_protein_conserved	-1.49176	1.09e-07	2.68e-07	1.23e-06	5.26566	1	1	http://tritrypdb.org/gene/TcCLB.509551.40
TcCLB.511353.10	peptidylprolyl_isomerase-like_putative	-1.49021	1.08e-05	1.23e-05	5.66e-05	8.37413	1	1	http://tritrypdb.org/gene/TcCLB.511353.10
TcCLB.511621.90	esterase_putative	-1.48955	3e-06	4.3e-06	1.97e-05	5.51128	1	1	http://tritrypdb.org/gene/TcCLB.511621.90
TcCLB.509827.20	hypothetical_protein_conserved	-1.48844	6.09e-08	1.63e-07	7.48e-07	5.35821	1	1	http://tritrypdb.org/gene/TcCLB.509827.20
TcCLB.504099.70	retrotransposon_hot_spot_protein_(RHS_pseudogene)_putative	-1.48832	0.102616	0.0318851	0.146277	1.17979	1	0	http://tritrypdb.org/gene/TcCLB.504099.70
TcCLB.511211.210	hypothetical_protein_conserved	-1.48714	3.76e-05	3.5e-05	0.000160619	4.86481	1	1	http://tritrypdb.org/gene/TcCLB.511211.210
TcCLB.507617.9	prostaglandin_F2alpha_synthase	-1.48571	4.32e-08	1.23e-07	5.64e-07	9.62189	1	1	http://tritrypdb.org/gene/TcCLB.507617.9
TcCLB.504507.20	DNA_replication_licensing_factor_(pseudogene)_putativeminichromosome_maintenance_protein-like_protein_putative	-1.48384	1.29e-06	2.13e-06	9.79e-06	4.45726	1	1	http://tritrypdb.org/gene/TcCLB.504507.20
TcCLB.503529.30	hypothetical_protein_conserved	-1.48236	5.42e-08	1.48e-07	6.79e-07	6.06905	1	1	http://tritrypdb.org/gene/TcCLB.503529.30
TcCLB.510311.110	hypothetical_protein_conserved	-1.48234	1.24e-07	3e-07	1.38e-06	5.91865	1	1	http://tritrypdb.org/gene/TcCLB.510311.110
TcCLB.508181.130	peter_pan_protein_putative	-1.48182	2.53e-10	1.77e-09	8.14e-09	6.57164	1	1	http://tritrypdb.org/gene/TcCLB.508181.130
TcCLB.510315.14	hypothetical_protein_conserved	-1.48155	2.44e-07	5.24e-07	2.4e-06	5.08696	1	1	http://tritrypdb.org/gene/TcCLB.510315.14
TcCLB.511575.20	hypothetical_protein_conserved	-1.48149	1.97e-08	6.38e-08	2.93e-07	4.90001	1	1	http://tritrypdb.org/gene/TcCLB.511575.20
TcCLB.506529.50	arginine_N-methyltransferase_putative	-1.47994	1.71e-09	8.28e-09	3.8e-08	6.81476	1	1	http://tritrypdb.org/gene/TcCLB.506529.50
TcCLB.506925.160	hypothetical_protein_conserved	-1.47895	7.39e-06	9e-06	4.13e-05	4.75814	1	1	http://tritrypdb.org/gene/TcCLB.506925.160
TcCLB.507963.90	hypothetical_protein_conserved	-1.47773	1.49e-09	7.38e-09	3.39e-08	6.16553	1	1	http://tritrypdb.org/gene/TcCLB.507963.90
TcCLB.507041.132	hypothetical_protein	-1.47763	0.00111323	0.000614161	0.00281754	4.42405	1	1	http://tritrypdb.org/gene/TcCLB.507041.132
TcCLB.503881.39	ribosomal_protein_L38_putative	-1.47637	1.25e-10	1.01e-09	4.62e-09	7.53074	1	1	http://tritrypdb.org/gene/TcCLB.503881.39
TcCLB.505009.4	hypothetical_protein_conserved	-1.47346	2.89e-05	2.79e-05	0.000127838	4.32994	1	1	http://tritrypdb.org/gene/TcCLB.505009.4
TcCLB.469785.5	hypothetical_protein_conserved	-1.47295	8.53e-06	1.01e-05	4.62e-05	4.58579	1	1	http://tritrypdb.org/gene/TcCLB.469785.5
TcCLB.511439.40	hypothetical_protein	-1.47038	4.62e-08	1.3e-07	5.98e-07	7.85161	1	1	http://tritrypdb.org/gene/TcCLB.511439.40
TcCLB.507091.10	hypothetical_protein_conserved	-1.469	5.4e-05	4.72e-05	0.000216759	4.85902	1	1	http://tritrypdb.org/gene/TcCLB.507091.10
TcCLB.506743.220	hypothetical_protein_conserved	-1.46793	5.31e-07	1.02e-06	4.66e-06	4.97635	1	1	http://tritrypdb.org/gene/TcCLB.506743.220
TcCLB.427355.10	oligosaccharyl_transferase_subunit_putative	-1.46759	1.9e-10	1.41e-09	6.47e-09	7.60589	1	1	http://tritrypdb.org/gene/TcCLB.427355.10
TcCLB.511687.19	voltage-dependent_anion-selective_channel_putative	-1.46707	0.0241158	0.00900472	0.0413103	4.22248	1	1	http://tritrypdb.org/gene/TcCLB.511687.19
TcCLB.511469.24	ADP-ribosylation_factor-like_2_arl2_putative	-1.46621	7.42e-05	6.18e-05	0.000283406	4.51135	1	1	http://tritrypdb.org/gene/TcCLB.511469.24
TcCLB.445553.10	hypothetical_protein_conserved	-1.46571	3.36e-06	4.74e-06	2.17e-05	6.25182	1	1	http://tritrypdb.org/gene/TcCLB.445553.10
TcCLB.510599.14	acetyl-CoA_carboxylase_(pseudogene)_putative	-1.46404	2.35e-10	1.68e-09	7.72e-09	7.53207	1	1	http://tritrypdb.org/gene/TcCLB.510599.14
TcCLB.510073.40	hypothetical_protein_conserved	-1.46368	0.000611482	0.000368165	0.001689	4.68113	1	1	http://tritrypdb.org/gene/TcCLB.510073.40
TcCLB.511217.80	hypothetical_protein_conserved	-1.46357	9.22e-06	1.08e-05	4.93e-05	4.56407	1	1	http://tritrypdb.org/gene/TcCLB.511217.80
TcCLB.510761.18	hypothetical_protein_conserved	-1.46243	1.19e-06	1.99e-06	9.14e-06	5.66428	1	1	http://tritrypdb.org/gene/TcCLB.510761.18
TcCLB.506797.30	hypothetical_protein	-1.4594	1.05e-11	1.47e-10	6.72e-10	7.55452	1	1	http://tritrypdb.org/gene/TcCLB.506797.30
TcCLB.511627.80	hypothetical_protein_conserved	-1.45797	1.63e-06	2.57e-06	1.18e-05	4.74014	1	1	http://tritrypdb.org/gene/TcCLB.511627.80
TcCLB.509599.100	hypothetical_protein	-1.45769	0.000412884	0.000264438	0.00121314	4.29126	1	1	http://tritrypdb.org/gene/TcCLB.509599.100
TcCLB.511745.10	heat_shock_70_kDa_protein_mitochondrial_precursor_putative	-1.45718	7.23e-05	6.04e-05	0.000276932	9.12181	1	1	http://tritrypdb.org/gene/TcCLB.511745.10
TcCLB.510963.70	ARP2/3_complex_subunit_putative	-1.45649	0.000118362	9.14e-05	0.000419518	4.51347	1	1	http://tritrypdb.org/gene/TcCLB.510963.70
TcCLB.510165.50	hypothetical_protein_conserved	-1.45348	5.06e-06	6.6e-06	3.03e-05	4.97782	1	1	http://tritrypdb.org/gene/TcCLB.510165.50
TcCLB.510603.30	hypothetical_protein_conserved	-1.45334	0.000356908	0.000232904	0.00106848	3.56003	1	1	http://tritrypdb.org/gene/TcCLB.510603.30
TcCLB.510755.65	hypothetical_protein	-1.45321	1.27e-08	4.39e-08	2.01e-07	5.62989	1	1	http://tritrypdb.org/gene/TcCLB.510755.65
TcCLB.505229.5	hypothetical_protein_conserved	-1.45016	6.33e-06	7.92e-06	3.63e-05	5.13465	1	1	http://tritrypdb.org/gene/TcCLB.505229.5
TcCLB.511589.100	hypothetical_protein_conserved	-1.44929	5.91e-06	7.45e-06	3.42e-05	4.92693	1	1	http://tritrypdb.org/gene/TcCLB.511589.100
TcCLB.506865.50	hypothetical_protein_conserved	-1.44877	2.58e-08	8.01e-08	3.68e-07	5.90278	1	1	http://tritrypdb.org/gene/TcCLB.506865.50
TcCLB.511211.160	heat_shock_protein_70_(hsp70)_putative	-1.44863	1.63e-07	3.77e-07	1.73e-06	12.0541	1	1	http://tritrypdb.org/gene/TcCLB.511211.160
TcCLB.509099.10	GTP-binding_protein_putative	-1.44831	2.4e-09	1.09e-08	4.98e-08	6.63524	1	1	http://tritrypdb.org/gene/TcCLB.509099.10
TcCLB.508093.29	hypothetical_protein_conserved_(pseudogene)	-1.44808	0.000582754	0.000354802	0.0016277	4.30968	1	1	http://tritrypdb.org/gene/TcCLB.508093.29
TcCLB.511553.180	hypothetical_protein	-1.44771	0.00154265	0.00081315	0.00373043	3.34388	1	1	http://tritrypdb.org/gene/TcCLB.511553.180
TcCLB.511621.60	dolichyl-P-Man:GDP-Man7GlcNAc2-PP-dolichyl_alpha-16-mannosyltransferase_putative	-1.44763	0.000663504	0.000394436	0.00180952	3.95292	1	1	http://tritrypdb.org/gene/TcCLB.511621.60
TcCLB.511041.4	hypothetical_protein_conserved	-1.44422	6.18e-05	5.3e-05	0.000243153	3.92914	1	1	http://tritrypdb.org/gene/TcCLB.511041.4
TcCLB.506885.70	polyadenylate-binding_protein_1_putative	-1.44368	3.93e-11	4.01e-10	1.84e-09	8.40306	1	1	http://tritrypdb.org/gene/TcCLB.506885.70
TcCLB.510493.20	hypothetical_protein_conserved	-1.4435	7.21e-07	1.31e-06	6e-06	4.9548	1	1	http://tritrypdb.org/gene/TcCLB.510493.20
TcCLB.461165.4	hypothetical_protein_conserved	-1.44221	1.24e-05	1.38e-05	6.34e-05	4.24536	1	1	http://tritrypdb.org/gene/TcCLB.461165.4
TcCLB.506811.20	hypothetical_protein_conserved	-1.44212	1.13e-08	4e-08	1.84e-07	6.34323	1	1	http://tritrypdb.org/gene/TcCLB.506811.20
TcCLB.506775.14	hypothetical_protein_conserved	-1.4418	4.47e-10	2.75e-09	1.26e-08	7.0805	1	1	http://tritrypdb.org/gene/TcCLB.506775.14
TcCLB.510287.4	NUDIX_hydrolase_putative	-1.43847	0.000845342	0.000485236	0.00222608	3.27206	1	1	http://tritrypdb.org/gene/TcCLB.510287.4
TcCLB.510167.4	hypothetical_protein_conserved	-1.43665	1.31e-06	2.16e-06	9.89e-06	5.21012	1	1	http://tritrypdb.org/gene/TcCLB.510167.4
TcCLB.508241.90	hypothetical_protein_conserved	-1.43665	9.86e-11	8.36e-10	3.84e-09	7.42697	1	1	http://tritrypdb.org/gene/TcCLB.508241.90
TcCLB.507047.80	zinc-finger_protein_ZPR1_putative	-1.43648	2.18e-09	9.99e-09	4.58e-08	6.54482	1	1	http://tritrypdb.org/gene/TcCLB.507047.80
TcCLB.507611.370	protein_disulfide_isomerase_putative	-1.43417	6.17e-08	1.64e-07	7.54e-07	9.26283	1	1	http://tritrypdb.org/gene/TcCLB.507611.370
TcCLB.510761.30	RNA_3'-terminal_phosphate_cyclase-like_protein_putative	-1.43302	1.03e-09	5.52e-09	2.53e-08	6.24193	1	1	http://tritrypdb.org/gene/TcCLB.510761.30
TcCLB.508285.60	trans-sialidase_putative	-1.43022	0.11156	0.0343044	0.157376	0.0500215	1	0	http://tritrypdb.org/gene/TcCLB.508285.60
TcCLB.510431.330	hypothetical_protein_conserved	-1.42997	1.05e-06	1.8e-06	8.24e-06	5.31109	1	1	http://tritrypdb.org/gene/TcCLB.510431.330
TcCLB.507805.30	hypothetical_protein_conserved_(pseudogene)	-1.4291	5.28e-05	4.63e-05	0.0002125	4.5033	1	1	http://tritrypdb.org/gene/TcCLB.507805.30
TcCLB.510609.10	trans-sialidase_(pseudogene)_putative	-1.42863	0.0322572	0.0116113	0.0532681	1.54406	1	0	http://tritrypdb.org/gene/TcCLB.510609.10
TcCLB.511133.10	hypothetical_protein_conserved	-1.4284	5.61e-06	7.13e-06	3.27e-05	5.0975	1	1	http://tritrypdb.org/gene/TcCLB.511133.10
TcCLB.503715.20	hypothetical_protein	-1.42715	0.00405413	0.00188892	0.00866565	4.9494	1	1	http://tritrypdb.org/gene/TcCLB.503715.20
TcCLB.504427.75	hypothetical_protein_conserved_(pseudogene)	-1.42626	1.87e-07	4.21e-07	1.93e-06	5.44928	1	1	http://tritrypdb.org/gene/TcCLB.504427.75
TcCLB.510507.50	RNA-binding_protein_putative	-1.42589	0.131804	0.039705	0.182152	-0.954001	1	0	http://tritrypdb.org/gene/TcCLB.510507.50
TcCLB.511567.11	trans-sialidase_putative	-1.42426	0.00149093	0.000790416	0.00362613	2.54153	1	1	http://tritrypdb.org/gene/TcCLB.511567.11
TcCLB.509551.95	anaphase_promoting_complex_subunit_protein_putative	-1.42421	3.83e-06	5.27e-06	2.42e-05	4.59871	1	1	http://tritrypdb.org/gene/TcCLB.509551.95
TcCLB.506289.60	hypothetical_protein_conserved	-1.42316	2.13e-09	9.82e-09	4.51e-08	6.72651	1	1	http://tritrypdb.org/gene/TcCLB.506289.60
TcCLB.506359.50	hypothetical_protein_conserved	-1.42302	1.14e-08	4.04e-08	1.85e-07	5.73454	1	1	http://tritrypdb.org/gene/TcCLB.506359.50
TcCLB.511037.20	hypothetical_protein_conserved	-1.42294	3.54e-09	1.51e-08	6.94e-08	6.57258	1	1	http://tritrypdb.org/gene/TcCLB.511037.20
TcCLB.419703.10	hypothetical_protein	-1.42226	6.93e-06	8.53e-06	3.91e-05	4.88651	1	1	http://tritrypdb.org/gene/TcCLB.419703.10
TcCLB.506933.107	hypothetical_protein_conserved	-1.42034	0.118373	0.0361605	0.165891	0.452861	1	0	http://tritrypdb.org/gene/TcCLB.506933.107
TcCLB.506693.20	hypothetical_protein_conserved	-1.42032	9.22e-08	2.33e-07	1.07e-06	5.2921	1	1	http://tritrypdb.org/gene/TcCLB.506693.20
TcCLB.432621.9	dispersed_gene_family_protein_1_(DGF-1)_putative	-1.4201	0.0851992	0.0270632	0.124156	0.740455	1	0	http://tritrypdb.org/gene/TcCLB.432621.9
TcCLB.504239.390	syntaxin_binding_protein_(pseudogene)_putative	-1.4196	0.0778865	0.0250757	0.115038	0.617384	1	0	http://tritrypdb.org/gene/TcCLB.504239.390
TcCLB.510747.114	hypothetical_protein_conserved	-1.41944	8.72e-05	7.06e-05	0.000323828	4.34721	1	1	http://tritrypdb.org/gene/TcCLB.510747.114
TcCLB.507529.10	RNA_binding_protein_putative	-1.41852	3.44e-09	1.48e-08	6.78e-08	7.09374	1	1	http://tritrypdb.org/gene/TcCLB.507529.10
TcCLB.508379.29	hypothetical_protein_conserved	-1.41752	0.000198774	0.000142114	0.000651966	3.84221	1	1	http://tritrypdb.org/gene/TcCLB.508379.29
TcCLB.485889.4	hypothetical_protein_conserved	-1.4174	6.13e-08	1.64e-07	7.52e-07	5.61621	1	1	http://tritrypdb.org/gene/TcCLB.485889.4
TcCLB.506859.4	N-acetyltransferase_putative	-1.41707	9.29e-06	1.08e-05	4.97e-05	4.27794	1	1	http://tritrypdb.org/gene/TcCLB.506859.4
TcCLB.506943.90	hypothetical_protein_conserved	-1.41707	2.18e-05	2.2e-05	0.000100882	5.11571	1	1	http://tritrypdb.org/gene/TcCLB.506943.90
TcCLB.511545.170	hypothetical_protein_conserved	-1.41615	6.65e-08	1.76e-07	8.07e-07	6.36215	1	1	http://tritrypdb.org/gene/TcCLB.511545.170
TcCLB.511067.17	no_Fct	-1.4157	0.00520541	0.00234439	0.0107552	3.56329	1	1	http://tritrypdb.org/gene/TcCLB.511067.17
TcCLB.506943.114	U6_snRNA-associated_Sm-like_protein_LSm5p	-1.41459	4.37e-07	8.66e-07	3.97e-06	5.33735	1	1	http://tritrypdb.org/gene/TcCLB.506943.114
TcCLB.477983.10	calpain_cysteine_peptidase_putative	-1.41456	0.0187114	0.00719283	0.032998	2.34177	1	1	http://tritrypdb.org/gene/TcCLB.477983.10
TcCLB.511621.120	hypothetical_protein_conserved	-1.41354	2.29e-09	1.05e-08	4.8e-08	6.59918	1	1	http://tritrypdb.org/gene/TcCLB.511621.120
TcCLB.509351.6	metacyclin_III	-1.41294	0.10575	0.0327361	0.150181	-1.29018	1	0	http://tritrypdb.org/gene/TcCLB.509351.6
TcCLB.504427.240	metallo-beta-lactamase-like_protein_putative	-1.40868	9.43e-08	2.37e-07	1.09e-06	5.2631	1	1	http://tritrypdb.org/gene/TcCLB.504427.240
TcCLB.506779.188	no_Fct	-1.40804	0.0284699	0.0104007	0.0477144	1.20234	1	1	http://tritrypdb.org/gene/TcCLB.506779.188
TcCLB.508685.9	dispersed_gene_family_protein_1_(DGF-1)_putative	-1.40794	0.133552	0.0401465	0.184177	2.17605	1	0	http://tritrypdb.org/gene/TcCLB.508685.9
TcCLB.508541.170	hypothetical_protein_conserved	-1.40477	2.94e-06	4.23e-06	1.94e-05	4.78828	1	1	http://tritrypdb.org/gene/TcCLB.508541.170
TcCLB.510773.110	hypothetical_protein_conserved	-1.4047	0.000154026	0.000114988	0.000527522	4.20928	1	1	http://tritrypdb.org/gene/TcCLB.510773.110
TcCLB.507011.50	hypothetical_protein_conserved	-1.40292	2.67e-10	1.82e-09	8.36e-09	6.84253	1	1	http://tritrypdb.org/gene/TcCLB.507011.50
TcCLB.506685.40	hypothetical_protein_conserved	-1.40276	2e-10	1.47e-09	6.74e-09	6.82736	1	1	http://tritrypdb.org/gene/TcCLB.506685.40
TcCLB.503405.10	glutamine_synthetase_putative	-1.40225	6.37e-07	1.18e-06	5.4e-06	7.07433	1	1	http://tritrypdb.org/gene/TcCLB.503405.10
TcCLB.507105.60	hypothetical_protein_conserved	-1.39996	2.07e-08	6.66e-08	3.06e-07	8.20627	1	1	http://tritrypdb.org/gene/TcCLB.507105.60
TcCLB.511361.4	hypothetical_protein_conserved	-1.39602	0.000524786	0.000324533	0.00148884	4.00497	1	1	http://tritrypdb.org/gene/TcCLB.511361.4
TcCLB.510013.100	hypothetical_protein	-1.3959	0.0402797	0.0141419	0.0648778	0.716209	1	0	http://tritrypdb.org/gene/TcCLB.510013.100
TcCLB.507165.20	hypothetical_protein_conserved	-1.39572	1.23e-05	1.37e-05	6.27e-05	4.7815	1	1	http://tritrypdb.org/gene/TcCLB.507165.20
TcCLB.438923.10	hypothetical_protein	-1.39509	1.69e-08	5.57e-08	2.56e-07	7.59523	1	1	http://tritrypdb.org/gene/TcCLB.438923.10
TcCLB.507603.70	hypothetical_protein_conserved	-1.39476	0.00025089	0.000172924	0.000793309	4.57462	1	1	http://tritrypdb.org/gene/TcCLB.507603.70
TcCLB.508209.120	10_kDa_heat_shock_protein_putative	-1.39376	1.47e-06	2.37e-06	1.09e-05	8.18351	1	1	http://tritrypdb.org/gene/TcCLB.508209.120
TcCLB.503401.11	retrotransposon_hot_spot_(RHS)_protein_putative	-1.39171	0.0442174	0.0153169	0.0702683	1.68076	1	0	http://tritrypdb.org/gene/TcCLB.503401.11
TcCLB.506737.60	hypothetical_protein_conserved	-1.39134	7.01e-06	8.62e-06	3.96e-05	4.60314	1	1	http://tritrypdb.org/gene/TcCLB.506737.60
TcCLB.506715.44	hypothetical_protein_conserved	-1.39109	4.26e-05	3.89e-05	0.000178255	4.38658	1	1	http://tritrypdb.org/gene/TcCLB.506715.44
TcCLB.511211.120	activated_protein_kinase_C_receptor_putativeguanine_nucleotide-binding_protein_beta_subunit-like_protein_putative	-1.39	2.37e-07	5.11e-07	2.35e-06	9.00266	1	1	http://tritrypdb.org/gene/TcCLB.511211.120
TcCLB.511211.220	heat_shock_protein_70_putative	-1.3877	5.24e-08	1.44e-07	6.62e-07	7.45502	1	1	http://tritrypdb.org/gene/TcCLB.511211.220
TcCLB.507959.240	syntaxin_binding_protein_(pseudogene)_putative	-1.38708	0.000283347	0.000191476	0.000878418	3.01544	1	1	http://tritrypdb.org/gene/TcCLB.507959.240
TcCLB.506857.110	hypothetical_protein_conserved	-1.38692	5.14e-06	6.68e-06	3.07e-05	6.32169	1	1	http://tritrypdb.org/gene/TcCLB.506857.110
TcCLB.507713.40	heat_shock_protein_85_putative	-1.38581	1.7e-05	1.79e-05	8.21e-05	9.58331	1	1	http://tritrypdb.org/gene/TcCLB.507713.40
TcCLB.506943.27	hypothetical_protein_conserved	-1.3857	1.22e-05	1.37e-05	6.26e-05	4.50611	1	1	http://tritrypdb.org/gene/TcCLB.506943.27
TcCLB.509625.20	hypothetical_protein_conserved	-1.38345	0.000100042	7.93e-05	0.000363579	4.65629	1	1	http://tritrypdb.org/gene/TcCLB.509625.20
TcCLB.450155.9	hypothetical_protein_conserved	-1.38257	0.000361244	0.00023533	0.0010796	5.20293	1	1	http://tritrypdb.org/gene/TcCLB.450155.9
TcCLB.504769.170	retrotransposon_hot_spot_protein_(RHS_pseudogene)_putative	-1.38077	0.0101021	0.00418525	0.0192003	2.81318	1	1	http://tritrypdb.org/gene/TcCLB.504769.170
TcCLB.505965.30	prenyltransferase_putative	-1.37976	1.61e-09	7.86e-09	3.61e-08	6.25304	1	1	http://tritrypdb.org/gene/TcCLB.505965.30
TcCLB.503865.40	hypothetical_protein_conserved	-1.37922	9.4e-09	3.39e-08	1.56e-07	5.97611	1	1	http://tritrypdb.org/gene/TcCLB.503865.40
TcCLB.503835.39	hypothetical_protein_conserved	-1.3785	9.96e-05	7.9e-05	0.000362313	5.59718	1	1	http://tritrypdb.org/gene/TcCLB.503835.39
TcCLB.506597.36	hypothetical_protein_conserved_(pseudogene)	-1.37736	0.00171237	0.000892256	0.00409334	2.67945	1	1	http://tritrypdb.org/gene/TcCLB.506597.36
TcCLB.511579.9	fatty_acyl_CoA_syntetase_1_putative	-1.37694	1.76e-05	1.84e-05	8.45e-05	4.50751	1	1	http://tritrypdb.org/gene/TcCLB.511579.9
TcCLB.509769.140	hypothetical_protein_conserved	-1.37629	9.17e-06	1.07e-05	4.92e-05	4.52701	1	1	http://tritrypdb.org/gene/TcCLB.509769.140
TcCLB.510747.5	hypothetical_protein_conserved	-1.37592	0.000779997	0.000452311	0.00207503	3.21692	1	1	http://tritrypdb.org/gene/TcCLB.510747.5
TcCLB.511135.40	hypothetical_protein_conserved	-1.37402	8.15e-08	2.1e-07	9.63e-07	5.3709	1	1	http://tritrypdb.org/gene/TcCLB.511135.40
TcCLB.508805.10	pre-mRNA_splicing_factor_ATP-dependent_RNA_helicase_(pseudogene)_putative	-1.36958	2.03e-06	3.09e-06	1.42e-05	7.55712	1	1	http://tritrypdb.org/gene/TcCLB.508805.10
TcCLB.506181.80	hypothetical_protein_conserved	-1.36949	4.54e-06	6.05e-06	2.78e-05	4.99986	1	1	http://tritrypdb.org/gene/TcCLB.506181.80
TcCLB.510763.90	hypothetical_protein_conserved	-1.3694	1.91e-07	4.3e-07	1.97e-06	5.70647	1	1	http://tritrypdb.org/gene/TcCLB.510763.90
TcCLB.508949.20	hypothetical_protein_conserved	-1.36887	0.000105166	8.29e-05	0.000380086	4.70579	1	1	http://tritrypdb.org/gene/TcCLB.508949.20
TcCLB.504427.70	3-oxo-5-alpha-steroid_4-dehydrogenase_putative	-1.36867	4.57e-07	9.01e-07	4.13e-06	5.57795	1	1	http://tritrypdb.org/gene/TcCLB.504427.70
TcCLB.511525.11	hypothetical_protein_conserved	-1.3675	4.46e-06	5.97e-06	2.74e-05	4.268	1	1	http://tritrypdb.org/gene/TcCLB.511525.11
TcCLB.504153.310	heat_shock_protein_putative	-1.36677	3.59e-07	7.31e-07	3.35e-06	9.03476	1	1	http://tritrypdb.org/gene/TcCLB.504153.310
TcCLB.509769.66	hypothetical_protein_conserved	-1.36603	3.48e-06	4.87e-06	2.24e-05	4.70452	1	1	http://tritrypdb.org/gene/TcCLB.509769.66
TcCLB.510857.50	lipoate-protein_ligase_putativelipoyl_ligase_putativelipoyltransferase_putativelipoate_biosynthesis_protein_putative	-1.36551	1.14e-06	1.93e-06	8.84e-06	6.14365	1	1	http://tritrypdb.org/gene/TcCLB.510857.50
TcCLB.503557.20	ankyrin_repeat_protein_putative	-1.36533	7.11e-06	8.73e-06	4e-05	5.23827	1	1	http://tritrypdb.org/gene/TcCLB.503557.20
TcCLB.507689.50	glutamamyl_carboxypeptidase_putativemetallo-peptidase_clan_MH_family_M18_putative	-1.3652	0.000590198	0.000358544	0.00164486	8.25089	1	1	http://tritrypdb.org/gene/TcCLB.507689.50
TcCLB.503779.70	hypothetical_protein_conserved	-1.36455	2.78e-06	4.05e-06	1.86e-05	4.96513	1	1	http://tritrypdb.org/gene/TcCLB.503779.70
TcCLB.510105.33	RNA-binding_protein_putative	-1.36447	0.000793001	0.000458686	0.00210428	4.04879	1	1	http://tritrypdb.org/gene/TcCLB.510105.33
TcCLB.507795.40	hypothetical_protein_conserved	-1.36438	4.33e-05	3.94e-05	0.000180589	4.33997	1	1	http://tritrypdb.org/gene/TcCLB.507795.40
TcCLB.510963.60	hypothetical_protein_conserved	-1.3637	6.18e-06	7.75e-06	3.56e-05	5.36805	1	1	http://tritrypdb.org/gene/TcCLB.510963.60
TcCLB.511335.19	hypothetical_protein_conserved_(pseudogene)	-1.36339	4.36e-06	5.85e-06	2.68e-05	4.47566	1	1	http://tritrypdb.org/gene/TcCLB.511335.19
TcCLB.506407.60	hypothetical_protein_conserved	-1.36172	1.67e-10	1.27e-09	5.83e-09	6.97332	1	1	http://tritrypdb.org/gene/TcCLB.506407.60
TcCLB.506529.516	ATP_synthase_subunit_putative	-1.36136	0.000455626	0.000287693	0.00131983	4.67979	1	1	http://tritrypdb.org/gene/TcCLB.506529.516
TcCLB.508647.270	malic_enzyme_putative	-1.36083	1.15e-10	9.31e-10	4.27e-09	7.64856	1	1	http://tritrypdb.org/gene/TcCLB.508647.270
TcCLB.507671.10	hypothetical_protein	-1.36058	1.09e-05	1.24e-05	5.67e-05	5.23666	1	1	http://tritrypdb.org/gene/TcCLB.507671.10
TcCLB.511747.30	hypothetical_protein_conserved	-1.35947	7.4e-07	1.34e-06	6.13e-06	5.74039	1	1	http://tritrypdb.org/gene/TcCLB.511747.30
TcCLB.503457.4	hypothetical_protein_conserved	-1.35483	0.000128625	9.83e-05	0.000451158	4.38316	1	1	http://tritrypdb.org/gene/TcCLB.503457.4
TcCLB.511585.100	hypothetical_protein_conserved	-1.35417	1.5e-07	3.52e-07	1.61e-06	4.81381	1	1	http://tritrypdb.org/gene/TcCLB.511585.100
TcCLB.507625.170	hypothetical_protein_conserved	-1.35395	1.1e-08	3.9e-08	1.79e-07	7.39968	1	1	http://tritrypdb.org/gene/TcCLB.507625.170
TcCLB.506825.10	RNA-binding_protein_putative	-1.35355	0.0969266	0.0303363	0.139171	1.10053	1	0	http://tritrypdb.org/gene/TcCLB.506825.10
TcCLB.503653.30	ribosomal_RNA_processing_protein_41B_putative3'_exoribonuclease_putative	-1.35159	1.18e-08	4.15e-08	1.9e-07	6.27902	1	1	http://tritrypdb.org/gene/TcCLB.503653.30
TcCLB.506753.220	hypothetical_protein_conserved	-1.34951	0.0021817	0.00110157	0.0050536	3.83329	1	1	http://tritrypdb.org/gene/TcCLB.506753.220
TcCLB.510101.10	protein_transport_protein_Sec31_putative_(pseudogene)	-1.34794	1.62e-09	7.92e-09	3.63e-08	6.50672	1	1	http://tritrypdb.org/gene/TcCLB.510101.10
TcCLB.504255.4	rhomboid-like_protein	-1.34749	1.51e-06	2.42e-06	1.11e-05	5.4503	1	1	http://tritrypdb.org/gene/TcCLB.504255.4
TcCLB.506401.250	hypothetical_protein_conserved	-1.34666	3.89e-10	2.46e-09	1.13e-08	7.5778	1	1	http://tritrypdb.org/gene/TcCLB.506401.250
TcCLB.509885.60	methyltransferase_putative	-1.3466	2.51e-05	2.47e-05	0.000113224	6.01937	1	1	http://tritrypdb.org/gene/TcCLB.509885.60
TcCLB.511309.7	hypothetical_protein	-1.34648	8.42e-05	6.86e-05	0.000314606	4.7981	1	1	http://tritrypdb.org/gene/TcCLB.511309.7
TcCLB.506399.80	hypothetical_protein_conserved	-1.34546	7.41e-05	6.17e-05	0.000283099	5.21174	1	1	http://tritrypdb.org/gene/TcCLB.506399.80
TcCLB.505009.20	divalent_cation_tolerance_protein_putative	-1.34286	4.08e-05	3.75e-05	0.000172015	4.59699	1	1	http://tritrypdb.org/gene/TcCLB.505009.20
TcCLB.506401.360	hypothetical_protein_conserved	-1.3428	5.34e-05	4.68e-05	0.000214754	4.47937	1	1	http://tritrypdb.org/gene/TcCLB.506401.360
TcCLB.507667.20	hypothetical_protein_conserved	-1.34175	8.85e-09	3.24e-08	1.49e-07	8.26835	1	1	http://tritrypdb.org/gene/TcCLB.507667.20
TcCLB.508085.10	GMP_synthase_putative	-1.34148	1.02e-05	1.17e-05	5.37e-05	5.35102	1	1	http://tritrypdb.org/gene/TcCLB.508085.10
TcCLB.482971.9	dispersed_gene_family_protein_1_(DGF-1)_putative	-1.34109	0.019829	0.00756635	0.0347116	2.39244	1	1	http://tritrypdb.org/gene/TcCLB.482971.9
TcCLB.510759.80	hypothetical_protein_conserved	-1.34085	5e-09	1.99e-08	9.14e-08	7.98693	1	1	http://tritrypdb.org/gene/TcCLB.510759.80
TcCLB.445869.10	hypothetical_protein_conserved	-1.34015	2.14e-06	3.23e-06	1.48e-05	5.9931	1	1	http://tritrypdb.org/gene/TcCLB.445869.10
TcCLB.511867.100	hypothetical_protein_conserved	-1.3395	7.94e-06	9.52e-06	4.37e-05	5.60513	1	1	http://tritrypdb.org/gene/TcCLB.511867.100
TcCLB.437121.9	hypothetical_protein_conserved	-1.33856	9.63e-09	3.47e-08	1.59e-07	7.08053	1	1	http://tritrypdb.org/gene/TcCLB.437121.9
TcCLB.510349.60	hypothetical_protein_conserved	-1.33747	8e-05	6.55e-05	0.000300546	4.2827	1	1	http://tritrypdb.org/gene/TcCLB.510349.60
TcCLB.510091.14	hypothetical_protein_conserved	-1.33729	4.35e-07	8.63e-07	3.96e-06	4.96341	1	1	http://tritrypdb.org/gene/TcCLB.510091.14
TcCLB.507047.70	hypothetical_protein_conserved	-1.33481	1.32e-05	1.44e-05	6.63e-05	4.61061	1	1	http://tritrypdb.org/gene/TcCLB.507047.70
TcCLB.506227.140	hypothetical_protein_conserved	-1.33389	0.000115136	8.93e-05	0.000409472	5.60108	1	1	http://tritrypdb.org/gene/TcCLB.506227.140
TcCLB.506265.150	hypothetical_protein_conserved	-1.33383	1.26e-06	2.09e-06	9.6e-06	4.90197	1	1	http://tritrypdb.org/gene/TcCLB.506265.150
TcCLB.510343.5	hypothetical_protein_conserved	-1.33263	0.000498065	0.000310535	0.00142462	4.27061	1	1	http://tritrypdb.org/gene/TcCLB.510343.5
TcCLB.509233.200	hypothetical_protein_conserved	-1.33237	2.38e-07	5.13e-07	2.36e-06	7.56748	1	1	http://tritrypdb.org/gene/TcCLB.509233.200
TcCLB.506953.10	hypothetical_protein_conserved_(pseudogene)	-1.33183	0.000125614	9.63e-05	0.000441781	3.68649	1	1	http://tritrypdb.org/gene/TcCLB.506953.10
TcCLB.507093.330	hypothetical_protein_conserved	-1.3302	9.82e-06	1.13e-05	5.2e-05	4.78179	1	1	http://tritrypdb.org/gene/TcCLB.507093.330
TcCLB.510029.40	RNA_polymerase_III_C11_subunit_putative	-1.32965	1.25e-05	1.39e-05	6.36e-05	5.56899	1	1	http://tritrypdb.org/gene/TcCLB.510029.40
TcCLB.511877.15	elongation_factor_1-gamma_(EF-1-gamma_pseudogene)_putative	-1.32903	0.00469157	0.00214002	0.00981759	4.10231	1	1	http://tritrypdb.org/gene/TcCLB.511877.15
TcCLB.508181.60	hypothetical_protein_conserved	-1.32845	9.04e-09	3.3e-08	1.51e-07	7.34806	1	1	http://tritrypdb.org/gene/TcCLB.508181.60
TcCLB.506211.190	hypothetical_protein_conserved	-1.32779	5.76e-11	5.27e-10	2.42e-09	7.4706	1	1	http://tritrypdb.org/gene/TcCLB.506211.190
TcCLB.511351.9	inosine-5'-monophosphate_dehydrogenase_putative	-1.32722	0.00018637	0.000134852	0.000618652	5.88715	1	1	http://tritrypdb.org/gene/TcCLB.511351.9
TcCLB.511745.60	hypothetical_protein	-1.3267	0.000164611	0.000121302	0.000556487	5.16737	1	1	http://tritrypdb.org/gene/TcCLB.511745.60
TcCLB.506907.40	hypothetical_protein	-1.32501	0.0997475	0.0310912	0.142635	-0.657518	1	0	http://tritrypdb.org/gene/TcCLB.506907.40
TcCLB.506699.40	katanin-like_protein_putativeserine_peptidase_Clan_SJ_family_S16_putative	-1.32362	3.58e-07	7.3e-07	3.35e-06	5.62693	1	1	http://tritrypdb.org/gene/TcCLB.506699.40
TcCLB.503651.40	hypothetical_protein	-1.32351	8.96e-07	1.57e-06	7.21e-06	5.76699	1	1	http://tritrypdb.org/gene/TcCLB.503651.40
TcCLB.503937.40	trans-sialidase_(pseudogene)_putative	-1.32342	3.56e-07	7.28e-07	3.34e-06	4.00273	1	1	http://tritrypdb.org/gene/TcCLB.503937.40
TcCLB.511733.80	hypothetical_protein	-1.32189	2.65e-10	1.82e-09	8.35e-09	7.94848	1	1	http://tritrypdb.org/gene/TcCLB.511733.80
TcCLB.511715.100	pumilio/PUF_RNA_binding_protein_7_putative	-1.32104	1.27e-08	4.39e-08	2.01e-07	6.57207	1	1	http://tritrypdb.org/gene/TcCLB.511715.100
TcCLB.506859.240	hypothetical_protein_conserved	-1.32081	0.00274195	0.00134082	0.00615117	3.97791	1	1	http://tritrypdb.org/gene/TcCLB.506859.240
TcCLB.511589.209	hypothetical_protein_conserved	-1.32043	8.6e-05	6.97e-05	0.000319752	4.82215	1	1	http://tritrypdb.org/gene/TcCLB.511589.209
TcCLB.506755.130	hypothetical_protein_conserved	-1.32039	1.78e-05	1.86e-05	8.53e-05	5.05485	1	1	http://tritrypdb.org/gene/TcCLB.506755.130
TcCLB.511713.9	hypothetical_protein_conserved	-1.32037	0.000205449	0.000146108	0.000670288	4.10402	1	1	http://tritrypdb.org/gene/TcCLB.511713.9
TcCLB.509441.10	hypothetical_protein_conserved	-1.31979	4.52e-08	1.28e-07	5.85e-07	6.36561	1	1	http://tritrypdb.org/gene/TcCLB.509441.10
TcCLB.510849.11	retrotransposon_hot_spot_protein_(RHS_pseudogene)_putative	-1.31899	0.0022408	0.00112625	0.0051668	3.74457	1	1	http://tritrypdb.org/gene/TcCLB.510849.11
TcCLB.506893.25	U6_snRNA-associated_Sm-like_protein_LSm6p	-1.31875	9.41e-06	1.1e-05	5.03e-05	4.37715	1	1	http://tritrypdb.org/gene/TcCLB.506893.25
TcCLB.506357.140	periodic_tryptophan_protein_2_putative	-1.31817	1.83e-09	8.62e-09	3.95e-08	7.2812	1	1	http://tritrypdb.org/gene/TcCLB.506357.140
TcCLB.508467.19	hypothetical_protein_conserved	-1.3173	0.000396667	0.000254911	0.00116944	4.28907	1	1	http://tritrypdb.org/gene/TcCLB.508467.19
TcCLB.510341.4	Monooxygenase_putative	-1.31724	0.000110721	8.63e-05	0.000395924	4.48774	1	1	http://tritrypdb.org/gene/TcCLB.510341.4
TcCLB.410943.10	hypothetical_protein_conserved	-1.31488	0.000771621	0.000448252	0.00205641	3.51667	1	1	http://tritrypdb.org/gene/TcCLB.410943.10
TcCLB.508185.19	ubiquitin_hydrolase_putative	-1.31298	6.16e-05	5.28e-05	0.000242316	3.99816	1	1	http://tritrypdb.org/gene/TcCLB.508185.19
TcCLB.511585.180	hypothetical_protein_conserved	-1.31188	6.4e-05	5.46e-05	0.000250488	5.14295	1	1	http://tritrypdb.org/gene/TcCLB.511585.180
TcCLB.507039.41	hypothetical_protein_conserved	-1.31089	2.52e-05	2.47e-05	0.00011345	4.94608	1	1	http://tritrypdb.org/gene/TcCLB.507039.41
TcCLB.510749.90	hypothetical_protein_conserved	-1.3082	4.09e-06	5.55e-06	2.55e-05	5.00034	1	1	http://tritrypdb.org/gene/TcCLB.510749.90
TcCLB.506147.9	prostaglandin_F2alpha_synthasedehydrogenase_putativeNADH:flavin_oxidoreductase/NADH_oxidase_putative	-1.30571	1.03e-06	1.77e-06	8.11e-06	8.78012	1	1	http://tritrypdb.org/gene/TcCLB.506147.9
TcCLB.506465.14	hypothetical_protein_conserved	-1.30499	1.9e-05	1.97e-05	9.02e-05	5.6015	1	1	http://tritrypdb.org/gene/TcCLB.506465.14
TcCLB.508539.20	hypothetical_protein_conserved	-1.30463	7.58e-06	9.19e-06	4.21e-05	4.87013	1	1	http://tritrypdb.org/gene/TcCLB.508539.20
TcCLB.508277.130	hypothetical_protein_conserved	-1.30367	0.000191886	0.000138143	0.000633746	4.39436	1	1	http://tritrypdb.org/gene/TcCLB.508277.130
TcCLB.510149.90	Golgi_vesicular_membrane_trafficking_protein_putative	-1.30331	1.75e-05	1.84e-05	8.42e-05	5.3305	1	1	http://tritrypdb.org/gene/TcCLB.510149.90
TcCLB.506857.120	hypothetical_protein_conserved	-1.30126	0.000657598	0.000391896	0.00179787	3.44917	1	1	http://tritrypdb.org/gene/TcCLB.506857.120
TcCLB.507867.70	prefoldin_subunit_putative	-1.30084	3.47e-06	4.86e-06	2.23e-05	4.92682	1	1	http://tritrypdb.org/gene/TcCLB.507867.70
TcCLB.510341.10	hypothetical_protein	-1.29833	0.000348579	0.000228187	0.00104684	4.08244	1	1	http://tritrypdb.org/gene/TcCLB.510341.10
TcCLB.510105.187	no_Fct	-1.29633	0.00457587	0.00209773	0.00962358	3.20545	1	1	http://tritrypdb.org/gene/TcCLB.510105.187
TcCLB.506599.91	surface_protease_GP63_(pseudogene)_putative	-1.29461	0.043238	0.0150165	0.06889	1.97128	1	0	http://tritrypdb.org/gene/TcCLB.506599.91
TcCLB.503779.50	hypothetical_protein_conserved	-1.29459	0.000872732	0.000498108	0.00228513	4.14944	1	1	http://tritrypdb.org/gene/TcCLB.503779.50
TcCLB.506407.100	hypothetical_protein_conserved	-1.29449	1.92e-09	9.01e-09	4.13e-08	6.8691	1	1	http://tritrypdb.org/gene/TcCLB.506407.100
TcCLB.507617.100	no_Fct	-1.29286	0.0013949	0.000748024	0.00343165	3.67247	1	1	http://tritrypdb.org/gene/TcCLB.507617.100
TcCLB.508787.5	mitochondrial_structure_specific_endonuclease_I_(SSE-1)_putative	-1.29246	0.0279367	0.0102321	0.046941	2.95136	1	1	http://tritrypdb.org/gene/TcCLB.508787.5
TcCLB.506215.10	hypothetical_protein	-1.29223	0.0017482	0.000908226	0.0041666	3.60107	1	1	http://tritrypdb.org/gene/TcCLB.506215.10
TcCLB.510529.39	hypothetical_protein_conserved	-1.29164	2.83e-05	2.73e-05	0.000125333	4.19178	1	1	http://tritrypdb.org/gene/TcCLB.510529.39
TcCLB.503779.80	hypothetical_protein_conserved_(pseudogene)	-1.29034	3.95e-10	2.47e-09	1.13e-08	6.68635	1	1	http://tritrypdb.org/gene/TcCLB.503779.80
TcCLB.503887.20	hypothetical_protein	-1.28814	1.4e-07	3.31e-07	1.52e-06	5.69614	1	1	http://tritrypdb.org/gene/TcCLB.503887.20
TcCLB.503589.19	hypothetical_protein_conserved	-1.28736	1.09e-06	1.85e-06	8.49e-06	5.08321	1	1	http://tritrypdb.org/gene/TcCLB.503589.19
TcCLB.419637.9	dispersed_gene_family_protein_1_(DGF-1)_putative	-1.28678	0.00165651	0.000866516	0.00397525	2.88647	1	1	http://tritrypdb.org/gene/TcCLB.419637.9
TcCLB.506567.130	hypothetical_protein_conserved	-1.28583	3.04e-06	4.34e-06	1.99e-05	5.14438	1	1	http://tritrypdb.org/gene/TcCLB.506567.130
TcCLB.504039.70	hypothetical_protein	-1.28529	0.0224436	0.00843696	0.0387056	2.62193	1	1	http://tritrypdb.org/gene/TcCLB.504039.70
TcCLB.510345.50	hypothetical_protein_conserved	-1.28489	0.000227907	0.000159218	0.000730432	4.69117	1	1	http://tritrypdb.org/gene/TcCLB.510345.50
TcCLB.509551.149	phosphatidylserine_decarboxylase_putative	-1.28418	8.93e-05	7.2e-05	0.000330263	4.58094	1	1	http://tritrypdb.org/gene/TcCLB.509551.149
TcCLB.504057.65	hypothetical_protein_conserved	-1.28379	2.43e-05	2.41e-05	0.000110373	4.73812	1	1	http://tritrypdb.org/gene/TcCLB.504057.65
TcCLB.503713.50	trans-sialidase_putative	-1.28272	2.71e-05	2.63e-05	0.000120651	3.69269	1	1	http://tritrypdb.org/gene/TcCLB.503713.50
TcCLB.507093.120	hypothetical_protein_conserved	-1.28105	5.5e-08	1.5e-07	6.86e-07	5.39239	1	1	http://tritrypdb.org/gene/TcCLB.507093.120
TcCLB.511181.130	hypothetical_protein	-1.28025	4.38e-09	1.8e-08	8.28e-08	6.03011	1	1	http://tritrypdb.org/gene/TcCLB.511181.130
TcCLB.508755.20	dispersed_gene_family_protein_1_(DGF-1_pseudogene)_putative	-1.27989	0.165925	0.0485021	0.222509	1.36635	1	0	http://tritrypdb.org/gene/TcCLB.508755.20
TcCLB.507521.115	hypothetical_protein_conserved	-1.27958	0.000221614	0.000155806	0.000714779	4.63993	1	1	http://tritrypdb.org/gene/TcCLB.507521.115
TcCLB.506777.100	hypothetical_protein_conserved	-1.27937	4.05e-05	3.73e-05	0.000171209	5.55139	1	1	http://tritrypdb.org/gene/TcCLB.506777.100
TcCLB.508091.10	trans-sialidase_(pseudogene)_putative	-1.27871	0.0327512	0.0117742	0.0540157	2.46948	1	0	http://tritrypdb.org/gene/TcCLB.508091.10
TcCLB.503875.40	hypothetical_protein	-1.27592	0.0496875	0.0169376	0.0777032	1.88834	1	0	http://tritrypdb.org/gene/TcCLB.503875.40
TcCLB.506457.70	hypothetical_protein_conserved	-1.27566	6.42e-06	8.01e-06	3.67e-05	5.0734	1	1	http://tritrypdb.org/gene/TcCLB.506457.70
TcCLB.506865.10	ARP2/3_complex_subunit_putative	-1.27485	9.74e-08	2.44e-07	1.12e-06	6.1544	1	1	http://tritrypdb.org/gene/TcCLB.506865.10
TcCLB.510255.29	hypothetical_protein_conserved	-1.27398	8.57e-07	1.51e-06	6.94e-06	5.99071	1	1	http://tritrypdb.org/gene/TcCLB.510255.29
TcCLB.510741.205	no_Fct	-1.27291	0.0725114	0.0236017	0.108276	0.805768	1	0	http://tritrypdb.org/gene/TcCLB.510741.205
TcCLB.511871.40	hypothetical_protein_conserved	-1.27221	1.26e-06	2.09e-06	9.6e-06	5.68378	1	1	http://tritrypdb.org/gene/TcCLB.511871.40
TcCLB.510603.100	hypothetical_protein_conserved	-1.27202	1.87e-05	1.94e-05	8.91e-05	5.6525	1	1	http://tritrypdb.org/gene/TcCLB.510603.100
TcCLB.510055.30	hypothetical_protein_conserved	-1.27194	0.0840182	0.0267402	0.122674	3.49132	1	0	http://tritrypdb.org/gene/TcCLB.510055.30
TcCLB.511587.10	hypothetical_protein	-1.27121	0.00135755	0.000730402	0.00335081	3.39312	1	1	http://tritrypdb.org/gene/TcCLB.511587.10
TcCLB.510963.5	hypothetical_protein_conserved	-1.27051	2.82e-06	4.09e-06	1.88e-05	4.55154	1	1	http://tritrypdb.org/gene/TcCLB.510963.5
TcCLB.507867.50	hypothetical_protein_conserved	-1.2693	4.83e-05	4.29e-05	0.000196782	5.02945	1	1	http://tritrypdb.org/gene/TcCLB.507867.50
TcCLB.506885.250	hypothetical_protein	-1.26881	4.22e-09	1.76e-08	8.08e-08	6.98506	1	1	http://tritrypdb.org/gene/TcCLB.506885.250
TcCLB.511799.9	hypothetical_protein_conserved	-1.26859	8.68e-07	1.53e-06	7.02e-06	6.99337	1	1	http://tritrypdb.org/gene/TcCLB.511799.9
TcCLB.509773.20	protein_kinase_putative	-1.2679	0.00134028	0.000723329	0.00331836	3.15243	1	1	http://tritrypdb.org/gene/TcCLB.509773.20
TcCLB.508369.50	acetyl-CoA_carboxylase_putative	-1.26761	7.91e-10	4.41e-09	2.02e-08	7.39579	1	1	http://tritrypdb.org/gene/TcCLB.508369.50
TcCLB.511211.104	hypothetical_protein_conserved	-1.26757	3.47e-06	4.86e-06	2.23e-05	5.07065	1	1	http://tritrypdb.org/gene/TcCLB.511211.104
TcCLB.509707.25	hypothetical_protein_conserved	-1.2674	5.11e-07	9.83e-07	4.51e-06	5.0639	1	1	http://tritrypdb.org/gene/TcCLB.509707.25
TcCLB.506683.19	GMP_synthase_(pseudogene)_putative	-1.26733	1.98e-05	2.03e-05	9.33e-05	5.94872	1	1	http://tritrypdb.org/gene/TcCLB.506683.19
TcCLB.506885.170	hypothetical_protein_conserved	-1.2673	5.43e-06	6.95e-06	3.19e-05	5.59681	1	1	http://tritrypdb.org/gene/TcCLB.506885.170
TcCLB.510205.70	surface_protease_GP63_putative	-1.26694	0.0316465	0.0114167	0.0523754	1.89288	1	0	http://tritrypdb.org/gene/TcCLB.510205.70
TcCLB.508995.20	hypothetical_protein_conserved	-1.26682	5.6e-10	3.28e-09	1.5e-08	7.32448	1	1	http://tritrypdb.org/gene/TcCLB.508995.20
TcCLB.506715.59	Monooxygenase_putative	-1.26667	0.000722488	0.000423703	0.00194379	3.29988	1	1	http://tritrypdb.org/gene/TcCLB.506715.59
TcCLB.509769.63	Ran-binding_protein_putative	-1.26663	1.51e-06	2.42e-06	1.11e-05	5.03542	1	1	http://tritrypdb.org/gene/TcCLB.509769.63
TcCLB.510607.51	retrotransposon_hot_spot_protein_(RHS_pseudogene)_putative	-1.26589	0.00375978	0.0017673	0.00810771	3.77386	1	1	http://tritrypdb.org/gene/TcCLB.510607.51
TcCLB.509125.10	mannosyltransferase-like_protein_putative	-1.26566	1.44e-10	1.13e-09	5.19e-09	8.42172	1	1	http://tritrypdb.org/gene/TcCLB.509125.10
TcCLB.510833.10	trans-sialidase_putative	-1.2651	0.00257793	0.00126932	0.00582316	2.99024	1	1	http://tritrypdb.org/gene/TcCLB.510833.10
TcCLB.510757.30	hypothetical_protein_conserved	-1.26292	4.84e-05	4.3e-05	0.000197178	5.08106	1	1	http://tritrypdb.org/gene/TcCLB.510757.30
TcCLB.511211.60	protein_phosphatase_4_catalytic_subunit_putative	-1.26185	1.28e-08	4.43e-08	2.03e-07	6.01508	1	1	http://tritrypdb.org/gene/TcCLB.511211.60
TcCLB.503757.49	hypothetical_protein_conserved	-1.2612	0.00520234	0.00234347	0.010751	4.05916	1	1	http://tritrypdb.org/gene/TcCLB.503757.49
TcCLB.507841.30	hypothetical_protein_conserved	-1.2609	5.15e-06	6.68e-06	3.07e-05	4.58269	1	1	http://tritrypdb.org/gene/TcCLB.507841.30
TcCLB.510289.3	hypothetical_protein_conserved	-1.2599	5.32e-05	4.67e-05	0.000214083	4.68195	1	1	http://tritrypdb.org/gene/TcCLB.510289.3
TcCLB.510861.125	hypothetical_protein_conserved	-1.25952	8.51e-05	6.92e-05	0.000317316	5.00157	1	1	http://tritrypdb.org/gene/TcCLB.510861.125
TcCLB.503833.50	hypothetical_protein_conserved	-1.25923	4.12e-10	2.55e-09	1.17e-08	8.47561	1	1	http://tritrypdb.org/gene/TcCLB.503833.50
TcCLB.511553.80	hypothetical_protein_conserved	-1.25913	0.00912345	0.00383484	0.0175928	2.037	1	1	http://tritrypdb.org/gene/TcCLB.511553.80
TcCLB.504057.178	hypothetical_protein_conserved	-1.25909	0.0996195	0.0310683	0.14253	1.96892	1	0	http://tritrypdb.org/gene/TcCLB.504057.178
TcCLB.511211.100	hypothetical_protein_conserved	-1.259	1.72e-05	1.81e-05	8.29e-05	5.25562	1	1	http://tritrypdb.org/gene/TcCLB.511211.100
TcCLB.506501.150	surface_protease_GP63_(pseudogene)_putative	-1.25749	0.0374253	0.0132417	0.0607478	1.85271	1	0	http://tritrypdb.org/gene/TcCLB.506501.150
TcCLB.503531.49	structural_maintenance_of_chromosome_3_putative	-1.25557	0.00032106	0.000212367	0.000974261	4.89644	1	1	http://tritrypdb.org/gene/TcCLB.503531.49
TcCLB.506529.530	hypothetical_protein_conserved	-1.25413	6.92e-06	8.53e-06	3.91e-05	4.7726	1	1	http://tritrypdb.org/gene/TcCLB.506529.530
TcCLB.510249.14	hypothetical_protein_conserved	-1.25379	0.0024901	0.00123219	0.00565283	3.22625	1	1	http://tritrypdb.org/gene/TcCLB.510249.14
TcCLB.505025.50	hypothetical_protein	-1.25358	0.0793051	0.0254497	0.116754	1.06095	1	0	http://tritrypdb.org/gene/TcCLB.505025.50
TcCLB.509965.210	hypothetical_protein_conserved	-1.2527	0.000147648	0.000110807	0.00050834	4.32019	1	1	http://tritrypdb.org/gene/TcCLB.509965.210
TcCLB.506179.50	hypothetical_protein_conserved	-1.25267	6.85e-06	8.46e-06	3.88e-05	5.97252	1	1	http://tritrypdb.org/gene/TcCLB.506179.50
TcCLB.507039.30	retrotransposon_hot_spot_protein_(RHS_pseudogene)_putative	-1.251	6.41e-09	2.46e-08	1.13e-07	9.01883	1	1	http://tritrypdb.org/gene/TcCLB.507039.30
TcCLB.410243.10	hypothetical_protein_conserved	-1.25088	0.000347117	0.000227336	0.00104293	4.09305	1	1	http://tritrypdb.org/gene/TcCLB.410243.10
TcCLB.506743.10	hypothetical_protein	-1.25028	4.4e-05	3.99e-05	0.000183105	4.89082	1	1	http://tritrypdb.org/gene/TcCLB.506743.10
TcCLB.506737.70	ubiquitin-like_protein_putative	-1.24984	9.98e-09	3.58e-08	1.64e-07	8.24801	1	1	http://tritrypdb.org/gene/TcCLB.506737.70
TcCLB.506221.120	hypothetical_protein_conserved	-1.24974	4.77e-05	4.24e-05	0.000194377	5.2903	1	1	http://tritrypdb.org/gene/TcCLB.506221.120
TcCLB.511803.80	hypothetical_protein_conserved	-1.24829	0.00386578	0.00181376	0.00832084	3.89645	1	1	http://tritrypdb.org/gene/TcCLB.511803.80
TcCLB.506591.30	hypothetical_protein_conserved	-1.24787	2.92e-08	8.87e-08	4.07e-07	6.46621	1	1	http://tritrypdb.org/gene/TcCLB.506591.30
TcCLB.509267.6	trans-sialidase_(pseudogene)_putative	-1.24702	0.00164228	0.000859862	0.00394472	4.39805	1	1	http://tritrypdb.org/gene/TcCLB.509267.6
TcCLB.508205.20	nucleolar_RNA_helicase_II_putative	-1.24696	6.6e-09	2.51e-08	1.15e-07	8.98737	1	1	http://tritrypdb.org/gene/TcCLB.508205.20
TcCLB.511131.70	hypothetical_protein_conserved	-1.24625	1.02e-06	1.75e-06	8.02e-06	5.53721	1	1	http://tritrypdb.org/gene/TcCLB.511131.70
TcCLB.506733.70	glycosyl_transferase-like_protein_putative	-1.24564	2.94e-07	6.15e-07	2.82e-06	5.6452	1	1	http://tritrypdb.org/gene/TcCLB.506733.70
TcCLB.506287.120	hypothetical_protein	-1.24554	4.83e-09	1.94e-08	8.92e-08	7.63462	1	1	http://tritrypdb.org/gene/TcCLB.506287.120
TcCLB.506925.510	RNA_processing_factor_1_putativeribosome_biogenesis_protein_putative	-1.24542	1.77e-07	4.03e-07	1.85e-06	6.88102	1	1	http://tritrypdb.org/gene/TcCLB.506925.510
TcCLB.507841.34	exosome-associated_protein_4_putative	-1.24523	5.44e-06	6.95e-06	3.19e-05	5.35529	1	1	http://tritrypdb.org/gene/TcCLB.507841.34
TcCLB.508345.9	CLC-type_chloride_channel_(pseudogene)_putative	-1.24499	0.00687059	0.00299785	0.013753	3.7726	1	1	http://tritrypdb.org/gene/TcCLB.508345.9
TcCLB.511421.185	hypothetical_protein_conserved	-1.24376	0.000486409	0.000304349	0.00139624	3.87015	1	1	http://tritrypdb.org/gene/TcCLB.511421.185
TcCLB.510769.30	hypothetical_protein_conserved	-1.24366	7.92e-08	2.04e-07	9.37e-07	7.15065	1	1	http://tritrypdb.org/gene/TcCLB.510769.30
TcCLB.504103.3	hypothetical_protein_conserved	-1.24333	7.06e-07	1.29e-06	5.91e-06	5.80878	1	1	http://tritrypdb.org/gene/TcCLB.504103.3
TcCLB.508955.20	hypothetical_protein_conserved	-1.24268	1.6e-07	3.71e-07	1.7e-06	7.8128	1	1	http://tritrypdb.org/gene/TcCLB.508955.20
TcCLB.510737.30	mitochondrial_carrier_protein_putative	-1.24242	4.53e-06	6.04e-06	2.77e-05	5.5314	1	1	http://tritrypdb.org/gene/TcCLB.510737.30
TcCLB.507927.90	hypothetical_protein_conserved	-1.24223	7.05e-06	8.66e-06	3.97e-05	4.84345	1	1	http://tritrypdb.org/gene/TcCLB.507927.90
TcCLB.430539.10	hypothetical_protein_conserved	-1.24209	0.00622307	0.00275057	0.0126186	2.82635	1	1	http://tritrypdb.org/gene/TcCLB.430539.10
TcCLB.507993.220	hypothetical_protein_conserved	-1.24124	5.11e-08	1.42e-07	6.51e-07	5.23154	1	1	http://tritrypdb.org/gene/TcCLB.507993.220
TcCLB.507047.134	hypothetical_protein_conserved	-1.24069	0.000120991	9.32e-05	0.000427678	4.34029	1	1	http://tritrypdb.org/gene/TcCLB.507047.134
TcCLB.503643.10	KU70_protein_putative	-1.24043	1.13e-06	1.92e-06	8.79e-06	5.60935	1	1	http://tritrypdb.org/gene/TcCLB.503643.10
TcCLB.503515.7	ribosomal_RNA_methyltransferase_putative	-1.23951	4.63e-07	9.1e-07	4.18e-06	5.51535	1	1	http://tritrypdb.org/gene/TcCLB.503515.7
TcCLB.509203.10	23-bisphosphoglycerate-independent_phosphoglycerate_mutase_putative	-1.23922	4.78e-06	6.31e-06	2.89e-05	4.73031	1	1	http://tritrypdb.org/gene/TcCLB.509203.10
TcCLB.506753.240	hypothetical_protein_conserved	-1.23894	8.47e-06	1e-05	4.6e-05	5.15797	1	1	http://tritrypdb.org/gene/TcCLB.506753.240
TcCLB.430539.20	amino_acid_transporter_putative	-1.23834	0.0797757	0.0255612	0.117265	1.4348	1	0	http://tritrypdb.org/gene/TcCLB.430539.20
TcCLB.506733.20	AMP_deaminase_putative	-1.23808	3.22e-09	1.41e-08	6.45e-08	7.95383	1	1	http://tritrypdb.org/gene/TcCLB.506733.20
TcCLB.506519.40	hypothetical_protein	-1.23804	0.0122504	0.00496519	0.0227784	2.85595	1	1	http://tritrypdb.org/gene/TcCLB.506519.40
TcCLB.508837.130	hypothetical_protein_conserved	-1.23752	6.47e-09	2.47e-08	1.13e-07	6.99139	1	1	http://tritrypdb.org/gene/TcCLB.508837.130
TcCLB.508839.30	trafficking_protein_particle_complex_subunit_3_putative	-1.23653	1.96e-05	2.01e-05	9.24e-05	4.62893	1	1	http://tritrypdb.org/gene/TcCLB.508839.30
TcCLB.511045.20	hypothetical_protein_conserved	-1.23644	5.02e-07	9.69e-07	4.44e-06	5.15421	1	1	http://tritrypdb.org/gene/TcCLB.511045.20
TcCLB.506925.370	MP44_(pseudogene)_putative	-1.23625	0.144097	0.0428086	0.19639	1.79999	1	0	http://tritrypdb.org/gene/TcCLB.506925.370
TcCLB.458015.4	hypothetical_protein_conserved	-1.23532	4.44e-09	1.82e-08	8.34e-08	6.93441	1	1	http://tritrypdb.org/gene/TcCLB.458015.4
TcCLB.504051.49	hypothetical_protein_conserved	-1.23451	5.04e-06	6.59e-06	3.02e-05	5.07041	1	1	http://tritrypdb.org/gene/TcCLB.504051.49
TcCLB.508771.34	hypothetical_protein_conserved	-1.23441	1.4e-05	1.52e-05	6.99e-05	4.65586	1	1	http://tritrypdb.org/gene/TcCLB.508771.34
TcCLB.510289.90	hypothetical_protein_conserved	-1.23435	0.000300525	0.000200529	0.000919952	4.23668	1	1	http://tritrypdb.org/gene/TcCLB.510289.90
TcCLB.506699.3	hypothetical_protein_conserved	-1.23294	1.14e-05	1.28e-05	5.89e-05	5.22241	1	1	http://tritrypdb.org/gene/TcCLB.506699.3
TcCLB.506925.280	hypothetical_protein_conserved	-1.23251	1.62e-06	2.55e-06	1.17e-05	5.55928	1	1	http://tritrypdb.org/gene/TcCLB.506925.280
TcCLB.511361.30	hypothetical_protein_conserved	-1.2323	5.76e-06	7.29e-06	3.34e-05	5.31185	1	1	http://tritrypdb.org/gene/TcCLB.511361.30
TcCLB.508647.260	hypothetical_protein_conserved	-1.23178	1.14e-05	1.29e-05	5.9e-05	5.76275	1	1	http://tritrypdb.org/gene/TcCLB.508647.260
TcCLB.510741.202	no_Fct	-1.2311	0.168743	0.0492202	0.225804	0.481379	1	0	http://tritrypdb.org/gene/TcCLB.510741.202
TcCLB.510431.310	hypothetical_protein_conserved	-1.23071	9.12e-06	1.07e-05	4.9e-05	4.09763	1	1	http://tritrypdb.org/gene/TcCLB.510431.310
TcCLB.503751.20	hypothetical_protein	-1.22939	0.00825015	0.00351506	0.0161258	2.20418	1	1	http://tritrypdb.org/gene/TcCLB.503751.20
TcCLB.506179.59	ATP-dependent_RNA_helicase_putative	-1.22889	1.6e-05	1.7e-05	7.78e-05	4.83474	1	1	http://tritrypdb.org/gene/TcCLB.506179.59
TcCLB.511873.41	hypothetical_protein_conserved_(pseudogene)	-1.22763	0.010711	0.00440948	0.0202291	2.73574	1	1	http://tritrypdb.org/gene/TcCLB.511873.41
TcCLB.511337.39	hypothetical_protein_conserved	-1.22684	1.49e-06	2.39e-06	1.1e-05	5.35511	1	1	http://tritrypdb.org/gene/TcCLB.511337.39
TcCLB.506925.40	RNA_polymerase_I_second_largest_subunit_putative	-1.22677	2.21e-10	1.61e-09	7.39e-09	8.17901	1	1	http://tritrypdb.org/gene/TcCLB.506925.40
TcCLB.507831.60	heat_shock_protein_putative	-1.22651	3.92e-05	3.62e-05	0.000166015	10.2571	1	1	http://tritrypdb.org/gene/TcCLB.507831.60
TcCLB.508183.4	aspartyl_aminopeptidase_putative	-1.2265	9.72e-06	1.13e-05	5.17e-05	5.78201	1	1	http://tritrypdb.org/gene/TcCLB.508183.4
TcCLB.507093.320	hypothetical_protein_conserved	-1.22609	8.6e-08	2.2e-07	1.01e-06	5.56182	1	1	http://tritrypdb.org/gene/TcCLB.507093.320
TcCLB.509823.10	hypothetical_protein_conserved	-1.22598	0.000157064	0.000116904	0.000536311	5.49104	1	1	http://tritrypdb.org/gene/TcCLB.509823.10
TcCLB.508169.80	hypothetical_protein_conserved	-1.22468	2.54e-06	3.74e-06	1.72e-05	5.12674	1	1	http://tritrypdb.org/gene/TcCLB.508169.80
TcCLB.510055.140	hypothetical_protein_conserved	-1.22451	1.52e-05	1.62e-05	7.45e-05	5.51378	1	1	http://tritrypdb.org/gene/TcCLB.510055.140
TcCLB.506249.60	40S_ribosomal_protein_S8_putative	-1.22435	3.72e-10	2.38e-09	1.09e-08	7.22288	1	1	http://tritrypdb.org/gene/TcCLB.506249.60
TcCLB.509631.160	hypothetical_protein_conserved	-1.22429	1.94e-07	4.35e-07	1.99e-06	5.54328	1	1	http://tritrypdb.org/gene/TcCLB.509631.160
TcCLB.511733.70	hypothetical_protein_conserved	-1.22329	5.15e-06	6.69e-06	3.07e-05	5.51065	1	1	http://tritrypdb.org/gene/TcCLB.511733.70
TcCLB.510297.10	hypothetical_protein_conserved	-1.22206	0.168402	0.0491459	0.225463	0.3705	1	0	http://tritrypdb.org/gene/TcCLB.510297.10
TcCLB.507611.389	hypothetical_protein_conserved	-1.22206	0.000512903	0.000318741	0.00146226	4.50775	1	1	http://tritrypdb.org/gene/TcCLB.507611.389
TcCLB.510515.70	hypothetical_protein_conserved	-1.22099	7.59e-06	9.19e-06	4.22e-05	5.08336	1	1	http://tritrypdb.org/gene/TcCLB.510515.70
TcCLB.506127.20	hypothetical_protein_conserved	-1.2203	0.000153741	0.00011485	0.00052689	4.2925	1	1	http://tritrypdb.org/gene/TcCLB.506127.20
TcCLB.510283.70	glycosyl_hydrolase-like_protein_putative	-1.21957	2.38e-08	7.51e-08	3.45e-07	7.11471	1	1	http://tritrypdb.org/gene/TcCLB.510283.70
TcCLB.506401.240	hypothetical_protein_conserved	-1.21946	3.61e-10	2.33e-09	1.07e-08	7.34576	1	1	http://tritrypdb.org/gene/TcCLB.506401.240
TcCLB.506885.360	hypothetical_protein_conserved	-1.21798	3.17e-07	6.56e-07	3.01e-06	5.82028	1	1	http://tritrypdb.org/gene/TcCLB.506885.360
TcCLB.509069.30	tubulin_binding_cofactor_A-like_protein_putative	-1.21635	7.14e-05	5.98e-05	0.000274269	5.33375	1	1	http://tritrypdb.org/gene/TcCLB.509069.30
TcCLB.510531.70	hypothetical_protein_conserved	-1.21608	1.4e-06	2.29e-06	1.05e-05	5.22924	1	1	http://tritrypdb.org/gene/TcCLB.510531.70
TcCLB.506943.110	hypothetical_protein	-1.21554	0.000480915	0.000301656	0.00138389	5.02585	1	1	http://tritrypdb.org/gene/TcCLB.506943.110
TcCLB.506863.20	hypothetical_protein	-1.21492	1.91e-05	1.97e-05	9.05e-05	5.44921	1	1	http://tritrypdb.org/gene/TcCLB.506863.20
TcCLB.504769.60	hypothetical_protein_conserved	-1.2147	0.00113853	0.000626451	0.00287392	3.26958	1	1	http://tritrypdb.org/gene/TcCLB.504769.60
TcCLB.507213.30	potassium_voltage-gated_channel_putative	-1.21466	5.12e-09	2.03e-08	9.33e-08	7.01055	1	1	http://tritrypdb.org/gene/TcCLB.507213.30
TcCLB.479517.40	hypothetical_protein_(pseudogene)	-1.21422	0.0643144	0.0212361	0.097423	1.67714	1	0	http://tritrypdb.org/gene/TcCLB.479517.40
TcCLB.511411.30	arginine_permease	-1.21412	8.67e-07	1.53e-06	7.01e-06	9.70722	1	1	http://tritrypdb.org/gene/TcCLB.511411.30
TcCLB.511529.59	hypothetical_protein	-1.2141	2.41e-08	7.58e-08	3.48e-07	5.89434	1	1	http://tritrypdb.org/gene/TcCLB.511529.59
TcCLB.509967.7	hypothetical_protein_conserved	-1.21379	0.00064889	0.000387212	0.00177638	4.69128	1	1	http://tritrypdb.org/gene/TcCLB.509967.7
TcCLB.503557.49	hypothetical_protein_conserved	-1.21349	2.51e-05	2.47e-05	0.000113301	4.46329	1	1	http://tritrypdb.org/gene/TcCLB.503557.49
TcCLB.508831.80	hypothetical_protein_conserved	-1.21347	4.33e-05	3.94e-05	0.000180882	4.5859	1	1	http://tritrypdb.org/gene/TcCLB.508831.80
TcCLB.510431.340	hypothetical_protein_conserved	-1.21303	3e-05	2.88e-05	0.000131982	5.045	1	1	http://tritrypdb.org/gene/TcCLB.510431.340
TcCLB.511045.10	hypothetical_protein_conserved	-1.21176	1.23e-08	4.28e-08	1.96e-07	6.52072	1	1	http://tritrypdb.org/gene/TcCLB.511045.10
TcCLB.504147.160	ADP-ribosylation_factor-like_protein_putative	-1.21129	1.2e-05	1.34e-05	6.15e-05	5.42491	1	1	http://tritrypdb.org/gene/TcCLB.504147.160
TcCLB.511545.60	hypothetical_protein	-1.20976	0.00415208	0.00192904	0.00884971	4.43318	1	1	http://tritrypdb.org/gene/TcCLB.511545.60
TcCLB.510123.60	hypothetical_protein_conserved	-1.20875	7.72e-08	2e-07	9.17e-07	6.60191	1	1	http://tritrypdb.org/gene/TcCLB.510123.60
TcCLB.509231.30	hypothetical_protein	-1.20853	0.000528258	0.000326415	0.00149747	4.72121	1	1	http://tritrypdb.org/gene/TcCLB.509231.30
TcCLB.511139.40	RNA_helicase_putative	-1.20739	3.25e-05	3.08e-05	0.000141274	5.63095	1	1	http://tritrypdb.org/gene/TcCLB.511139.40
TcCLB.508781.110	2-oxoisovalerate_dehydrogenase_alpha_subunit_putative	-1.20726	7.12e-08	1.87e-07	8.57e-07	6.81122	1	1	http://tritrypdb.org/gene/TcCLB.508781.110
TcCLB.509443.10	hypothetical_protein	-1.20673	4.41e-05	4e-05	0.000183484	4.74802	1	1	http://tritrypdb.org/gene/TcCLB.509443.10
TcCLB.511589.170	oxidoreductase_putative	-1.2065	0.00273098	0.00133631	0.00613051	5.46812	1	1	http://tritrypdb.org/gene/TcCLB.511589.170
TcCLB.507237.200	hypothetical_protein	-1.20624	0.155233	0.0457474	0.209872	0.450383	1	0	http://tritrypdb.org/gene/TcCLB.507237.200
TcCLB.511419.4	hypothetical_protein_conserved	-1.20445	4.69e-05	4.19e-05	0.000192161	5.01103	1	1	http://tritrypdb.org/gene/TcCLB.511419.4
TcCLB.482097.10	hypothetical_protein_conserved	-1.20442	0.00670213	0.00293558	0.0134673	4.04511	1	1	http://tritrypdb.org/gene/TcCLB.482097.10
TcCLB.509895.70	hypothetical_protein_conserved	-1.20437	0.000937706	0.000529625	0.00242972	4.1685	1	1	http://tritrypdb.org/gene/TcCLB.509895.70
TcCLB.411427.49	hypothetical_protein_conserved	-1.20328	2.47e-06	3.67e-06	1.68e-05	4.97565	1	1	http://tritrypdb.org/gene/TcCLB.411427.49
TcCLB.506493.30	hypothetical_protein_conserved	-1.20291	1.81e-09	8.57e-09	3.93e-08	7.28324	1	1	http://tritrypdb.org/gene/TcCLB.506493.30
TcCLB.511337.4	hypothetical_protein_conserved	-1.2015	0.00198167	0.00101359	0.00464998	3.84253	1	1	http://tritrypdb.org/gene/TcCLB.511337.4
TcCLB.506967.20	hypothetical_protein	-1.20045	0.0847741	0.0269425	0.123602	1.3441	1	0	http://tritrypdb.org/gene/TcCLB.506967.20
TcCLB.504769.89	hypothetical_protein_conserved	-1.20002	0.00372354	0.00175279	0.00804115	4.06327	1	1	http://tritrypdb.org/gene/TcCLB.504769.89
TcCLB.509967.3	hypothetical_protein_conserved_(pseudogene)	-1.19915	2.77e-05	2.68e-05	0.000122903	4.45161	1	1	http://tritrypdb.org/gene/TcCLB.509967.3
TcCLB.510749.60	hypothetical_protein_conserved	-1.19911	6.92e-06	8.53e-06	3.91e-05	5.67392	1	1	http://tritrypdb.org/gene/TcCLB.510749.60
TcCLB.507467.10	receptor-type_adenylate_cyclase_putative	-1.19817	0.00105514	0.000585657	0.00268677	4.25406	1	1	http://tritrypdb.org/gene/TcCLB.507467.10
TcCLB.506369.70	histone_H1_putative	-1.19761	3.91e-05	3.62e-05	0.000165938	12.1061	1	1	http://tritrypdb.org/gene/TcCLB.506369.70
TcCLB.508387.60	hypothetical_protein_conserved	-1.19741	0.000119608	9.22e-05	0.00042303	5.47467	1	1	http://tritrypdb.org/gene/TcCLB.508387.60
TcCLB.509443.48	hypothetical_protein_conserved	-1.19697	3.77e-05	3.5e-05	0.000160791	5.64372	1	1	http://tritrypdb.org/gene/TcCLB.509443.48
TcCLB.510287.60	ribonuclease_HII_putative	-1.19635	2.21e-07	4.83e-07	2.22e-06	6.31685	1	1	http://tritrypdb.org/gene/TcCLB.510287.60
TcCLB.510565.153	no_Fct	-1.194	0.169081	0.0493125	0.226227	0.183013	1	0	http://tritrypdb.org/gene/TcCLB.510565.153
TcCLB.509073.100	hypothetical_protein_conserved	-1.19373	0.000661724	0.00039384	0.00180679	5.23997	1	1	http://tritrypdb.org/gene/TcCLB.509073.100
TcCLB.508307.180	hypothetical_protein_conserved	-1.19354	2.66e-07	5.68e-07	2.6e-06	6.59703	1	1	http://tritrypdb.org/gene/TcCLB.508307.180
TcCLB.507083.40	hypothetical_protein_conserved	-1.19334	6.45e-05	5.49e-05	0.000251752	4.33255	1	1	http://tritrypdb.org/gene/TcCLB.507083.40
TcCLB.509137.30	imidazolonepropionase_putative	-1.19301	3.13e-05	2.98e-05	0.000136813	6.78416	1	1	http://tritrypdb.org/gene/TcCLB.509137.30
TcCLB.508277.280	hypothetical_protein	-1.1917	1.24e-05	1.38e-05	6.31e-05	5.13222	1	1	http://tritrypdb.org/gene/TcCLB.508277.280
TcCLB.511369.10	elongation_factor_1-alpha_(ef-1-alpha)_putative	-1.19115	0.00884101	0.00372926	0.0171084	11.5853	1	1	http://tritrypdb.org/gene/TcCLB.511369.10
TcCLB.506363.80	aminoacylase_putativeN-acyl-L-amino_acid_amidohydrolase_putative	-1.18913	0.000599495	0.000362821	0.00166449	3.88227	1	1	http://tritrypdb.org/gene/TcCLB.506363.80
TcCLB.503665.10	trans-sialidase_(pseudogene)_putative	-1.18911	0.000513709	0.000318981	0.00146336	3.93221	1	1	http://tritrypdb.org/gene/TcCLB.503665.10
TcCLB.508923.10	amino_acid_permease_putative	-1.18823	0.00170042	0.000886639	0.00406757	4.47558	1	1	http://tritrypdb.org/gene/TcCLB.508923.10
TcCLB.506457.40	hypoxanthine-guanine_phosphoribosyltransferase_putative	-1.18768	1.55e-05	1.65e-05	7.58e-05	6.7114	1	1	http://tritrypdb.org/gene/TcCLB.506457.40
TcCLB.504147.140	hypothetical_protein	-1.18699	2.3e-07	4.99e-07	2.29e-06	6.56342	1	1	http://tritrypdb.org/gene/TcCLB.504147.140
TcCLB.507047.140	hypothetical_protein_conserved	-1.18633	1.96e-09	9.1e-09	4.17e-08	7.22759	1	1	http://tritrypdb.org/gene/TcCLB.507047.140
TcCLB.506413.70	hypothetical_protein_conserved	-1.18562	8.38e-07	1.48e-06	6.81e-06	6.88561	1	1	http://tritrypdb.org/gene/TcCLB.506413.70
TcCLB.507105.20	hypothetical_protein_conserved	-1.18425	1.79e-06	2.77e-06	1.27e-05	5.73998	1	1	http://tritrypdb.org/gene/TcCLB.507105.20
TcCLB.511361.20	hypothetical_protein_conserved	-1.18404	0.000155869	0.000116135	0.000532784	5.10055	1	1	http://tritrypdb.org/gene/TcCLB.511361.20
TcCLB.506743.135	trans-sialidase_(pseudogene)_putative	-1.18398	0.00315163	0.00151452	0.00694807	3.22975	1	1	http://tritrypdb.org/gene/TcCLB.506743.135
TcCLB.506773.50	nucleoside_transporter-like_putative	-1.1837	4.62e-05	4.14e-05	0.000190116	6.59806	1	1	http://tritrypdb.org/gene/TcCLB.506773.50
TcCLB.510343.15	protein_kinase_putative	-1.18323	0.00521655	0.00234875	0.0107752	3.26142	1	1	http://tritrypdb.org/gene/TcCLB.510343.15
TcCLB.507625.160	hypothetical_protein_conserved	-1.18315	3.05e-05	2.92e-05	0.00013382	4.78859	1	1	http://tritrypdb.org/gene/TcCLB.507625.160
TcCLB.507467.30	hypothetical_protein_conserved	-1.18188	1.06e-05	1.21e-05	5.56e-05	5.04901	1	1	http://tritrypdb.org/gene/TcCLB.507467.30
TcCLB.508583.10	hypothetical_protein_conserved	-1.18174	2.6e-06	3.82e-06	1.75e-05	5.86343	1	1	http://tritrypdb.org/gene/TcCLB.508583.10
TcCLB.508047.30	trans-sialidase_(pseudogene)_putative	-1.18155	0.00460241	0.0021082	0.00967162	3.06372	1	1	http://tritrypdb.org/gene/TcCLB.508047.30
TcCLB.507105.50	hypothetical_protein	-1.18071	7.15e-05	5.99e-05	0.00027477	8.28911	1	1	http://tritrypdb.org/gene/TcCLB.507105.50
TcCLB.506865.79	hypothetical_protein_conserved	-1.18065	0.00213736	0.00108398	0.0049729	3.26093	1	1	http://tritrypdb.org/gene/TcCLB.506865.79
TcCLB.506753.130	hypothetical_protein_conserved	-1.18046	0.00115018	0.0006321	0.00289984	4.45683	1	1	http://tritrypdb.org/gene/TcCLB.506753.130
TcCLB.511211.80	hypothetical_protein_conserved	-1.18023	8.33e-06	9.87e-06	4.53e-05	5.15433	1	1	http://tritrypdb.org/gene/TcCLB.511211.80
TcCLB.503531.10	hypothetical_protein_conserved	-1.17956	0.000956506	0.00053851	0.00247048	3.92082	1	1	http://tritrypdb.org/gene/TcCLB.503531.10
TcCLB.510027.10	GDP-mannose_46_dehydratase_putative	-1.17942	2.76e-07	5.84e-07	2.68e-06	6.25598	1	1	http://tritrypdb.org/gene/TcCLB.510027.10
TcCLB.509123.20	hypothetical_protein	-1.17899	0.00736626	0.00318344	0.0146044	2.29628	1	1	http://tritrypdb.org/gene/TcCLB.509123.20
TcCLB.508541.100	surface_protease_GP63_putative	-1.17897	0.00516059	0.00232788	0.0106794	3.38789	1	1	http://tritrypdb.org/gene/TcCLB.508541.100
TcCLB.510253.29	hypothetical_protein_conserved	-1.17857	0.000506597	0.00031551	0.00144744	4.84373	1	1	http://tritrypdb.org/gene/TcCLB.510253.29
TcCLB.511127.40	hypothetical_protein	-1.17782	5.99e-06	7.55e-06	3.46e-05	5.36403	1	1	http://tritrypdb.org/gene/TcCLB.511127.40
TcCLB.510431.245	hypothetical_protein_conserved_(pseudogene)	-1.17771	6e-05	5.17e-05	0.000237192	4.80538	1	1	http://tritrypdb.org/gene/TcCLB.510431.245
TcCLB.510349.20	hypothetical_protein_conserved	-1.17758	2.16e-05	2.19e-05	0.00010025	4.58955	1	1	http://tritrypdb.org/gene/TcCLB.510349.20
TcCLB.505807.160	hypothetical_protein_conserved	-1.17739	1.3e-06	2.15e-06	9.85e-06	5.31835	1	1	http://tritrypdb.org/gene/TcCLB.505807.160
TcCLB.503651.49	hypothetical_protein_conserved_(pseudogene)	-1.17651	4.09e-05	3.76e-05	0.000172324	4.6699	1	1	http://tritrypdb.org/gene/TcCLB.503651.49
TcCLB.509543.10	hypothetical_protein	-1.17575	0.00218744	0.00110374	0.00506354	4.05429	1	1	http://tritrypdb.org/gene/TcCLB.509543.10
TcCLB.508125.65	elongation_factor_1-gamma_(EF-1-gamma_pseudogene)_putative	-1.17559	0.000894728	0.000508373	0.00233222	4.15986	1	1	http://tritrypdb.org/gene/TcCLB.508125.65
TcCLB.511751.260	hypothetical_protein_conserved	-1.17512	0.000698074	0.000411183	0.00188635	4.5167	1	1	http://tritrypdb.org/gene/TcCLB.511751.260
TcCLB.503893.181	hypothetical_protein_conserved	-1.17499	0.00199167	0.00101776	0.00466912	4.30401	1	1	http://tritrypdb.org/gene/TcCLB.503893.181
TcCLB.506211.200	aminopeptidase_putativemetallo-peptidase_Clan_MG_Family_M24_putative	-1.17429	1.26e-09	6.46e-09	2.96e-08	8.44845	1	1	http://tritrypdb.org/gene/TcCLB.506211.200
TcCLB.504247.20	ATP-dependent_RNA_helicase_putative	-1.17415	9.21e-10	5e-09	2.29e-08	8.03865	1	1	http://tritrypdb.org/gene/TcCLB.504247.20
TcCLB.510841.10	mitotic_centromere-associated_kinesin_(MCAK_pseudogene)_putative	-1.17379	0.00101134	0.000565194	0.0025929	3.83254	1	1	http://tritrypdb.org/gene/TcCLB.510841.10
TcCLB.482097.20	hypothetical_protein_conserved	-1.17343	0.0836802	0.0266438	0.122232	2.5597	1	0	http://tritrypdb.org/gene/TcCLB.482097.20
TcCLB.511423.104	RNA_polymerase_subunit_putative	-1.17337	1.32e-06	2.17e-06	9.96e-06	5.81325	1	1	http://tritrypdb.org/gene/TcCLB.511423.104
TcCLB.507757.30	hypothetical_protein_conserved	-1.17318	5.66e-05	4.91e-05	0.000225246	4.8256	1	1	http://tritrypdb.org/gene/TcCLB.507757.30
TcCLB.509011.20	RNA_polymerase_IIA_largest_subunit_putative	-1.17273	1.21e-09	6.27e-09	2.88e-08	9.73912	1	1	http://tritrypdb.org/gene/TcCLB.509011.20
[truncated: 1,225 more rows]

## Sheet: Ama6 vs Trypo
TriTrypDB Gene ID	Annotation	log2Fold-change	P-value	Qval	adj.P.Val	AveExpr	Qvals.fc	AdjPvals.fc	TriTrypDB Link
[truncated: 1,975 more rows]

## Sheet: Ama12 vs Trypo
TriTrypDB Gene ID	Annotation	log2Fold-change	P-value	Qval	adj.P.Val	AveExpr	Qvals.fc	AdjPvals.fc	TriTrypDB Link
[truncated: 2,295 more rows]

[truncated: 23 more sheets: Ama24 vs Trypo, Ama48 vs Trypo, Ama72 vs Trypo, Ama4 vs Ama6, Ama4 vs Ama12, Ama4 vs Ama24, Ama4 vs Ama48, Ama4 vs Ama72, Ama6 vs Ama12, Ama6 vs Ama24, Ama6 vs Ama48, Ama6 vs Ama72, Ama12 vs Ama24, Ama12 vs Ama48, Ama12 vs Ama72, Ama24 vs Ama48, Ama24 vs Ama72, Ama4 vs Epi, Ama6 vs Epi, Ama12 vs Epi …]
