# Supplementary material for: Transcriptome Remodeling in Trypanosoma cruzi and Human Cells during Intracellular Infection
Source: PLoS Pathog. 2016 Apr 5;12(4):e1005511. doi: 10.1371/journal.ppat.1005511 (PMC4821583; doi:10.1371/journal.ppat.1005511)
Supplement: S7 Table — Each sheet reports differential expression results for a specific comparison. The columns include gene id, gene function, log2 fold change, P value, q-value, adjusted P value, average expression value, qvals.fc, and adjPvals.fc. The latter two are Booleans set to 1 when abs(log2 FC) ≥ 1.0 and q-value or adjusted P value < 0.05 respectively. Genes are considered differentially expressed when the qvals.fc = 1. (XLSX) [file ppat.1005511.s017.xlsx]

## Sheet: SUMMARY and LEGEND
Supplementary Table 6. Differentially Expressed Genes in Trypanosoma cruzi-infected human fibroblasts. Datasheets contain the results of pairwise comparisons of two different infection conditions. Each infected human fibroblast sample was compared to matched uninfected controls at the same time point (eg. uninfected vs 4 hpi). Pairwise comparisons of differentially expressed genes are also made b…
Column identifiers	Explanation
ENSEMBL ID	Gene ID
log2Fold-change	log2 transformed fold change of the gene expression values between two samples
AveExpr	Quantile normalized and log transformed gene expression value, output from Limma package
P-value	P value of the comparison , output from Limma package
Qval	Q value of the comparison , calculated from P value for the correction of Type I error.
Adj.P.Val	Adjusted P value of the comparison , output from Limma package
Qvals.fc	Indicator of whether a comparison has Q value < 0.05 and a log2 fold change > 1 (Pass = 1; Fail = 0)
AdjPvals.fc	Indicator of whether a comparison has adjusted P value < 0.05 and a log2 fold change > 1 (Pass = 1; Fail = 0)
Annotation	Gene annotation from ENSEMBL
hpi	Hours post-infection
Interpretation
eg. Pairwise comparison: A vs B
If log2Fold-change > 1.0, then gene of interest is more highly expressed in B
If log2Fold-change <-1.0 Gene of interest is more highly expressed in A

## Sheet: Uninfected vs 4 hpi
ENSEMBL ID	log2Fold-change	AveExpr	P-value	Adj.P-value	Qval	Qvals.FC	Adjusted Pvals.FC	Annotation
ENSG00000079112	3.1694	3.32198	0.00866776	0.0877834	0.0452432	1	0	cadherin_17,_LI_cadherin_(liver-intestine)
ENSG00000142583	3.05555	1.2926	0.000284733	0.0235469	0.012136	1	1	solute_carrier_family_2_(facilitated_glucose/fructose_transporter),_member_5
ENSG00000169429	2.94912	0.78656	6.16184e-05	0.0139082	0.00716825	1	1	interleukin_8
ENSG00000228035	2.88102	0.889771	0.000327032	0.0243296	0.0125394	1	1	no_fct
ENSG00000104951	2.85864	2.12593	1.17662e-05	0.00865406	0.00446027	1	1	interleukin_4_induced_1
ENSG00000162433	2.78693	1.67879	7.31829e-05	0.0147469	0.00760046	1	1	adenylate_kinase_4
ENSG00000213648	2.74103	-0.528025	0.010646	0.096925	0.0499547	1	0	sulfotransferase_family,_cytosolic,_1A,_phenol-preferring,_member_4
ENSG00000142677	2.59473	1.29522	0.00739088	0.0819858	0.0422551	1	0	interleukin_22_receptor,_alpha_1
ENSG00000135114	2.43602	4.5412	2.16817e-05	0.011004	0.00567141	1	1	2'-5'-oligoadenylate_synthetase-like
ENSG00000180138	2.39227	1.90657	0.00957124	0.0920299	0.0474318	1	0	casein_kinase_1,_alpha_1-like
ENSG00000164330	2.3353	0.430298	1.06239e-05	0.00865406	0.00446027	1	1	early_B-cell_factor_1
ENSG00000234362	2.33324	1.43684	0.000136385	0.0200384	0.0103277	1	1	no_fct
ENSG00000113070	2.3239	0.889115	0.000166789	0.020792	0.0107161	1	1	heparin-binding_EGF-like_growth_factor
ENSG00000111341	2.22045	-1.24663	1.53313e-05	0.0100495	0.00517949	1	1	matrix_Gla_protein
ENSG00000148677	2.20568	0.883514	2.7469e-05	0.0111145	0.00572837	1	1	ankyrin_repeat_domain_1_(cardiac_muscle)
ENSG00000163739	2.19882	0.949818	0.000499078	0.027849	0.0143533	1	1	chemokine_(C-X-C_motif)_ligand_1_(melanoma_growth_stimulating_activity,_alpha)
ENSG00000213005	2.18771	1.24068	0.00853925	0.0870495	0.0448649	1	0	no_fct
ENSG00000130600	2.12062	0.202114	0.00694212	0.0801546	0.0413114	1	0	H19,_imprinted_maternally_expressed_transcript_(non-protein_coding)
ENSG00000072041	2.10162	1.07766	0.000769988	0.0324078	0.0167028	1	1	solute_carrier_family_6_(neutral_amino_acid_transporter),_member_15
ENSG00000214872	2.09886	1.6952	3.36435e-06	0.00706995	0.00364382	1	1	smoothelin-like_1
ENSG00000172572	2.09421	-0.605931	5.14206e-05	0.0134608	0.00693762	1	1	phosphodiesterase_3A,_cGMP-inhibited
ENSG00000123610	2.07041	1.2259	0.000387129	0.0258849	0.0133409	1	1	tumor_necrosis_factor,_alpha-induced_protein_6
ENSG00000102524	2.03794	2.0704	0.00278677	0.0542959	0.0279839	1	0	tumor_necrosis_factor_(ligand)_superfamily,_member_13b
ENSG00000136244	1.98297	0.956895	0.000791006	0.0327766	0.0168929	1	1	interleukin_6_(interferon,_beta_2)
ENSG00000130775	1.96293	2.70828	4.9432e-05	0.0134608	0.00693762	1	1	chromosome_1_open_reading_frame_38
ENSG00000108700	1.90247	0.98517	0.00203454	0.047824	0.0246483	1	1	chemokine_(C-C_motif)_ligand_8
ENSG00000232769	1.89633	0.512277	7.95417e-05	0.0151956	0.00783173	1	1	Uncharacterized_protein
ENSG00000171388	1.86851	0.842966	0.00779994	0.0837497	0.0431642	1	0	apelin
ENSG00000102802	1.86636	0.283239	0.000471218	0.0275747	0.0142119	1	1	chromosome_13_open_reading_frame_33
ENSG00000185862	1.84916	-0.0453114	2.96389e-05	0.0111792	0.0057617	1	1	ecotropic_viral_integration_site_2B
ENSG00000161570	1.83773	3.26654	0.00931244	0.0903006	0.0465405	1	0	chemokine_(C-C_motif)_ligand_5
ENSG00000175063	1.82171	0.794369	0.000343973	0.0245161	0.0126355	1	1	ubiquitin-conjugating_enzyme_E2C
ENSG00000114115	1.81211	0.951044	0.000279106	0.0235469	0.012136	1	1	retinol_binding_protein_1,_cellular
ENSG00000136492	1.80494	1.16596	0.000983006	0.0358809	0.0184929	1	1	BRCA1_interacting_protein_C-terminal_helicase_1
ENSG00000143228	1.73802	0.539212	0.00153043	0.0440062	0.0226806	1	1	NUF2,_NDC80_kinetochore_complex_component,_homolog_(S._cerevisiae)
ENSG00000143847	1.73693	0.804094	4.20544e-05	0.0124337	0.00640825	1	1	protein_tyrosine_phosphatase,_receptor_type,_f_polypeptide_(PTPRF),_interacting_protein_(liprin),_alpha_4
ENSG00000196684	1.71318	0.890584	0.000247484	0.0225538	0.0116241	1	1	hematopoietic_SH2_domain_containing
ENSG00000082074	1.6923	0.688339	0.00100125	0.0360988	0.0186052	1	1	FYN_binding_protein
ENSG00000118193	1.68899	0.410693	0.00210628	0.0480036	0.0247409	1	1	kinesin_family_member_14
ENSG00000072571	1.68544	0.294581	0.000875684	0.0341385	0.0175949	1	1	hyaluronan-mediated_motility_receptor_(RHAMM)
ENSG00000128342	1.67121	0.809382	7.94291e-06	0.00865406	0.00446027	1	1	leukemia_inhibitory_factor_(cholinergic_differentiation_factor)
ENSG00000254545	1.66616	0.258645	0.000865216	0.0341385	0.0175949	1	1	no_fct
ENSG00000162849	1.65252	0.0660265	1.25772e-05	0.00881005	0.00454066	1	1	kinesin_family_member_26B
ENSG00000152253	1.6508	0.448655	0.000894333	0.0343271	0.0176921	1	1	SPC25,_NDC80_kinetochore_complex_component,_homolog_(S._cerevisiae)
ENSG00000120217	1.64148	1.42082	0.00230896	0.0493512	0.0254354	1	1	CD274_molecule
ENSG00000023445	1.63888	0.902465	0.000295292	0.0235469	0.012136	1	1	baculoviral_IAP_repeat_containing_3
ENSG00000184661	1.62701	0.31181	0.000171024	0.0211408	0.0108959	1	1	cell_division_cycle_associated_2
ENSG00000144834	1.60978	0.614231	0.00325777	0.0582496	0.0300216	1	0	transgelin_3
ENSG00000112742	1.60689	0.583061	0.0036086	0.0607485	0.0313095	1	0	TTK_protein_kinase
ENSG00000197299	1.58718	0.524848	0.000982568	0.0358809	0.0184929	1	1	Bloom_syndrome,_RecQ_helicase-like
ENSG00000126860	1.58265	0.146084	0.00165244	0.0448948	0.0231386	1	1	ecotropic_viral_integration_site_2A
ENSG00000115163	1.5815	0.452865	0.00125911	0.0399549	0.0205926	1	1	centromere_protein_A
ENSG00000121621	1.58124	0.264627	0.000327482	0.0243296	0.0125394	1	1	kinesin_family_member_18A
ENSG00000171408	1.57288	-0.0248585	7.01182e-05	0.0147469	0.00760046	1	1	phosphodiesterase_7B
ENSG00000119508	1.56998	0.988575	0.00170786	0.0454298	0.0234143	1	1	nuclear_receptor_subfamily_4,_group_A,_member_3
ENSG00000116194	1.56987	1.99671	0.00164933	0.0448948	0.0231386	1	1	angiopoietin-like_1
ENSG00000168961	1.55656	2.33614	0.000114915	0.0196557	0.0101305	1	1	lectin,_galactoside-binding,_soluble,_9
ENSG00000165490	1.55533	0.502672	0.000274011	0.0235469	0.012136	1	1	chromosome_11_open_reading_frame_82
ENSG00000254838	1.5506	-0.0196117	0.001696	0.0454298	0.0234143	1	1	GTPase,_very_large_interferon_inducible_pseudogene_1
ENSG00000148773	1.5433	0.326687	0.000333123	0.0244139	0.0125828	1	1	antigen_identified_by_monoclonal_antibody_Ki-67
ENSG00000104043	1.53642	0.00561499	0.00472881	0.0684717	0.03529	1	0	ATPase,_class_I,_type_8B,_member_4
ENSG00000172738	1.52949	0.385742	2.06378e-06	0.00555162	0.00286128	1	1	transmembrane_protein_217
ENSG00000175084	1.52419	0.145828	0.00177767	0.0458935	0.0236533	1	1	desmin
ENSG00000227619	1.51932	-0.141256	0.00875383	0.0877834	0.0452432	1	0	no_fct
ENSG00000107968	1.5161	0.192638	9.62906e-06	0.00865406	0.00446027	1	1	mitogen-activated_protein_kinase_kinase_kinase_8
ENSG00000137959	1.5154	4.11513	0.00183917	0.0459563	0.0236857	1	1	interferon-induced_protein_44-like
ENSG00000163734	1.50424	0.397289	0.00261208	0.0518682	0.0267326	1	0	chemokine_(C-X-C_motif)_ligand_3
ENSG00000024526	1.49981	0.391645	0.00144193	0.0423368	0.0218202	1	1	DEP_domain_containing_1
ENSG00000171223	1.49945	0.25888	0.000434882	0.0264344	0.0136242	1	1	jun_B_proto-oncogene
ENSG00000117724	1.49921	0.306723	0.00245537	0.0503042	0.0259266	1	0	centromere_protein_F,_350/400kDa_(mitosin)
ENSG00000237649	1.49859	0.600656	0.000275189	0.0235469	0.012136	1	1	kinesin_family_member_C1
ENSG00000189057	1.49455	0.270745	0.000430898	0.0264344	0.0136242	1	1	family_with_sequence_similarity_111,_member_B
ENSG00000138778	1.48954	0.223148	0.000859977	0.0341385	0.0175949	1	1	centromere_protein_E,_312kDa
ENSG00000168389	1.48655	1.17519	5.93124e-06	0.00793168	0.00408796	1	1	major_facilitator_superfamily_domain_containing_2A
ENSG00000101447	1.4802	0.407708	7.90785e-05	0.0151956	0.00783173	1	1	family_with_sequence_similarity_83,_member_D
ENSG00000140285	1.47885	-0.115301	5.34656e-05	0.0134608	0.00693762	1	1	fibroblast_growth_factor_7
ENSG00000126787	1.47863	0.369928	0.00136992	0.0413166	0.0212944	1	1	discs,_large_(Drosophila)_homolog-associated_protein_5
ENSG00000168334	1.4783	0.579939	0.0032983	0.0583148	0.0300552	1	0	xin_actin-binding_repeat_containing_1
ENSG00000117228	1.47367	1.37334	0.00205892	0.0478289	0.0246508	1	1	guanylate_binding_protein_1,_interferon-inducible
ENSG00000158402	1.46742	0.492504	0.000815532	0.0334164	0.0172227	1	1	cell_division_cycle_25_homolog_C_(S._pombe)
ENSG00000121152	1.46394	0.554316	0.000582014	0.0298628	0.0153911	1	1	non-SMC_condensin_I_complex,_subunit_H
ENSG00000179388	1.46101	-0.0353673	0.00311938	0.0567896	0.0292691	1	0	early_growth_response_3
ENSG00000111247	1.46002	0.58187	0.00123784	0.0399549	0.0205926	1	1	RAD51_associated_protein_1
ENSG00000169684	1.45944	0.704683	0.000735369	0.0319094	0.0164459	1	1	cholinergic_receptor,_nicotinic,_alpha_5
ENSG00000164342	1.45594	1.39757	0.00502776	0.0701028	0.0361307	1	0	toll-like_receptor_3
ENSG00000151882	1.45373	0.0805948	3.98818e-05	0.0124337	0.00640825	1	1	chemokine_(C-C_motif)_ligand_28
ENSG00000180616	1.44881	1.08221	0.0018205	0.0459136	0.0236637	1	1	somatostatin_receptor_2
ENSG00000090889	1.44687	0.346816	0.00690758	0.080018	0.0412409	1	0	kinesin_family_member_4A
ENSG00000091651	1.44248	0.859218	0.000934675	0.0348078	0.0179398	1	1	origin_recognition_complex,_subunit_6
ENSG00000134690	1.44096	0.389076	0.000123421	0.0199114	0.0102623	1	1	cell_division_cycle_associated_8
ENSG00000131747	1.4407	0.396749	0.00142457	0.0419948	0.021644	1	1	topoisomerase_(DNA)_II_alpha_170kDa
ENSG00000171241	1.43767	0.571794	0.000775054	0.0324078	0.0167028	1	1	SHC_SH2-domain_binding_protein_1
ENSG00000157680	1.43614	0.00713916	2.35409e-05	0.011004	0.00567141	1	1	diacylglycerol_kinase,_iota
ENSG00000099998	1.43311	-0.196359	0.00233881	0.0493995	0.0254603	1	1	gamma-glutamyltransferase_5
ENSG00000144596	1.43226	2.15728	0.0018136	0.0458935	0.0236533	1	1	glutamate_receptor_interacting_protein_2
ENSG00000203721	1.43038	0.156395	0.000595609	0.0298674	0.0153935	1	1	chromosome_1_open_reading_frame_98
ENSG00000154839	1.42898	0.529979	0.000383631	0.0258849	0.0133409	1	1	spindle_and_kinetochore_associated_complex_subunit_1
ENSG00000230417	1.42805	0.54027	0.000191899	0.0213251	0.0109909	1	1	no_fct
ENSG00000151725	1.42553	0.462844	0.00209973	0.0480036	0.0247409	1	1	MLF1_interacting_protein
ENSG00000078081	1.42541	0.732664	0.00112403	0.0379232	0.0195455	1	1	lysosomal-associated_membrane_protein_3
ENSG00000138180	1.42186	0.382735	0.000838577	0.0338887	0.0174661	1	1	centrosomal_protein_55kDa
ENSG00000104313	1.41879	0.0577111	0.00443671	0.0669191	0.0344898	1	0	eyes_absent_homolog_1_(Drosophila)
ENSG00000112984	1.41773	0.270085	0.00180295	0.0458935	0.0236533	1	1	kinesin_family_member_20A
ENSG00000165480	1.41524	0.532967	0.00702298	0.0802964	0.0413844	1	0	spindle_and_kinetochore_associated_complex_subunit_3
ENSG00000156970	1.41446	0.499316	0.0010151	0.0365088	0.0188165	1	1	budding_uninhibited_by_benzimidazoles_1_homolog_beta_(yeast)
ENSG00000172201	1.41426	-0.0787078	0.0028064	0.0544314	0.0280537	1	0	inhibitor_of_DNA_binding_4,_dominant_negative_helix-loop-helix_protein
ENSG00000174371	1.414	0.331326	0.000163714	0.0205832	0.0106085	1	1	exonuclease_1
ENSG00000111331	1.41399	2.95188	0.00103249	0.0368637	0.0189994	1	1	2'-5'-oligoadenylate_synthetase_3,_100kDa
ENSG00000080986	1.41223	0.520926	0.000400073	0.0262726	0.0135408	1	1	NDC80_homolog,_kinetochore_complex_component_(S._cerevisiae)
ENSG00000119922	1.40815	3.5933	0.00874797	0.0877834	0.0452432	1	0	interferon-induced_protein_with_tetratricopeptide_repeats_2
ENSG00000142731	1.40799	0.653949	0.00285656	0.0546425	0.0281625	1	0	polo-like_kinase_4
ENSG00000162645	1.40712	0.674294	4.49218e-05	0.0127077	0.00654949	1	1	guanylate_binding_protein_2,_interferon-inducible
ENSG00000186409	1.40625	0.0148526	0.00146981	0.0428986	0.0221098	1	1	coiled-coil_domain_containing_30
ENSG00000134769	1.40066	0.381289	4.80634e-06	0.00712367	0.00367151	1	1	dystrobrevin,_alpha
ENSG00000104321	1.39955	0.365641	0.00647511	0.0778177	0.0401069	1	0	transient_receptor_potential_cation_channel,_subfamily_A,_member_1
ENSG00000163735	1.39906	0.376415	8.15022e-06	0.00865406	0.00446027	1	1	chemokine_(C-X-C_motif)_ligand_5
ENSG00000179300	1.39613	-0.0646238	0.00228281	0.0493512	0.0254354	1	1	zinc_finger,_CCHC_domain_containing_5
ENSG00000075218	1.39507	0.505607	0.000650998	0.0308955	0.0159234	1	1	G-2_and_S-phase_expressed_1
ENSG00000205413	1.3929	1.65421	0.00539428	0.0719954	0.0371061	1	0	sterile_alpha_motif_domain_containing_9
ENSG00000035499	1.38653	0.456123	0.00204723	0.0478289	0.0246508	1	1	DEP_domain_containing_1B
ENSG00000138347	1.38497	-0.20322	2.12768e-05	0.011004	0.00567141	1	1	myopalladin
ENSG00000163808	1.37223	0.254665	0.00249718	0.0508774	0.026222	1	0	kinesin_family_member_15
ENSG00000179750	1.37111	0.600629	0.000375418	0.0256101	0.0131993	1	1	apolipoprotein_B_mRNA_editing_enzyme,_catalytic_polypeptide-like_3B
ENSG00000168386	1.36511	0.00375933	0.00113032	0.038048	0.0196098	1	1	filamin_A_interacting_protein_1-like
ENSG00000106236	1.36154	0.15706	0.00768695	0.0834502	0.0430099	1	0	neuronal_pentraxin_II
ENSG00000138944	1.3585	0.887979	0.00174599	0.0456413	0.0235233	1	1	KIAA1644
ENSG00000109805	1.35805	0.43517	0.00158845	0.044286	0.0228248	1	1	non-SMC_condensin_I_complex,_subunit_G
ENSG00000070808	1.34952	0.0797239	0.00474161	0.0684717	0.03529	1	0	calcium/calmodulin-dependent_protein_kinase_II_alpha
ENSG00000117152	1.34841	0.54943	0.00114668	0.0383355	0.0197579	1	1	regulator_of_G-protein_signaling_4
ENSG00000105011	1.34767	0.402015	0.000299381	0.0236769	0.0122029	1	1	ASF1_anti-silencing_function_1_homolog_B_(S._cerevisiae)
ENSG00000231131	1.34634	-0.407244	2.79159e-05	0.0111145	0.00572837	1	1	no_fct
ENSG00000205336	1.34601	0.400027	0.00842266	0.0864963	0.0445798	1	0	G_protein-coupled_receptor_56
ENSG00000049540	1.34567	-0.135693	0.00631545	0.0770098	0.0396905	1	0	elastin
ENSG00000095752	1.34504	0.312903	0.000288348	0.0235469	0.012136	1	1	interleukin_11
ENSG00000234332	1.34338	1.095	0.00336496	0.0590674	0.0304431	1	0	no_fct
ENSG00000149968	1.34044	0.0397012	7.79084e-05	0.0151956	0.00783173	1	1	matrix_metallopeptidase_3_(stromelysin_1,_progelatinase)
ENSG00000051341	1.33844	0.627529	0.00109084	0.0378267	0.0194957	1	1	polymerase_(DNA_directed),_theta
ENSG00000076382	1.33743	0.549077	0.0010513	0.0373731	0.0192619	1	1	sperm_associated_antigen_5
ENSG00000170312	1.33619	0.573036	0.003025	0.0560425	0.0288841	1	0	cyclin-dependent_kinase_1
ENSG00000100739	1.33569	0.227482	0.000220666	0.0218085	0.01124	1	1	bradykinin_receptor_B1
ENSG00000074410	1.33312	0.117752	0.000658737	0.030975	0.0159644	1	1	carbonic_anhydrase_XII
ENSG00000118407	1.33306	0.116642	0.00430734	0.0657954	0.0339107	1	0	filamin_A_interacting_protein_1
ENSG00000137812	1.32578	0.207767	0.000548788	0.0288309	0.0148593	1	1	cancer_susceptibility_candidate_5
ENSG00000100167	1.32432	0.399003	0.00699944	0.0801748	0.0413217	1	0	septin_3
ENSG00000120539	1.32397	1.07429	0.00111072	0.0379224	0.019545	1	1	microtubule_associated_serine/threonine_kinase-like
ENSG00000249862	1.32105	0.222333	0.00804102	0.084971	0.0437937	1	0	no_fct
ENSG00000142945	1.31767	0.61307	0.00206043	0.0478289	0.0246508	1	1	kinesin_family_member_2C
ENSG00000108691	1.3169	0.657852	7.18252e-05	0.0147469	0.00760046	1	1	chemokine_(C-C_motif)_ligand_2
ENSG00000114268	1.31598	0.752078	4.22626e-05	0.0124337	0.00640825	1	1	6-phosphofructo-2-kinase/fructose-2,6-biphosphatase_4
ENSG00000104722	1.31581	0.34629	0.00363004	0.0607485	0.0313095	1	0	neurofilament,_medium_polypeptide
ENSG00000226935	1.31378	-0.0570209	0.00556515	0.0729429	0.0375944	1	0	no_fct
ENSG00000169607	1.31197	0.365419	0.00155592	0.04426	0.0228114	1	1	cytoskeleton_associated_protein_2-like
ENSG00000247095	1.31146	0.697593	0.00304328	0.0561689	0.0289492	1	0	no_fct
ENSG00000168078	1.31085	0.431144	0.00473243	0.0684717	0.03529	1	0	PDZ_binding_kinase
ENSG00000109674	1.29694	0.33515	0.000933056	0.0348078	0.0179398	1	1	nei_endonuclease_VIII-like_3_(E._coli)
ENSG00000137804	1.29517	0.333687	0.00178923	0.0458935	0.0236533	1	1	nucleolar_and_spindle_associated_protein_1
ENSG00000254510	1.29365	0.472653	0.000797898	0.032877	0.0169447	1	1	no_fct
ENSG00000153044	1.28875	0.468994	0.00330596	0.0583801	0.0300888	1	0	centromere_protein_H
ENSG00000169679	1.2877	0.594626	0.00157789	0.04426	0.0228114	1	1	budding_uninhibited_by_benzimidazoles_1_homolog_(yeast)
ENSG00000134326	1.28702	4.33596	0.00597011	0.0747246	0.0385127	1	0	cytidine_monophosphate_(UMP-CMP)_kinase_2,_mitochondrial
ENSG00000171320	1.28278	0.510208	0.00137909	0.0413166	0.0212944	1	1	establishment_of_cohesion_1_homolog_2_(S._cerevisiae)
ENSG00000154920	1.28194	0.38984	0.00215377	0.0483287	0.0249084	1	1	essential_meiotic_endonuclease_1_homolog_1_(S._pombe)
ENSG00000171848	1.28193	0.539378	0.0023621	0.0494261	0.025474	1	1	ribonucleotide_reductase_M2
ENSG00000186185	1.28126	0.392964	0.000672215	0.0310767	0.0160168	1	1	kinesin_family_member_18B
ENSG00000129810	1.28046	0.478032	0.00137894	0.0413166	0.0212944	1	1	shugoshin-like_1_(S._pombe)
ENSG00000093009	1.2732	0.466305	7.5697e-05	0.0150473	0.00775534	1	1	cell_division_cycle_45_homolog_(S._cerevisiae)
ENSG00000186354	1.27298	0.288613	0.000212293	0.0218085	0.01124	1	1	chromosome_9_open_reading_frame_47
ENSG00000135451	1.27262	0.460004	0.00115686	0.0385884	0.0198883	1	1	trophinin_associated_protein_(tastin)
ENSG00000145386	1.27207	0.370456	0.00512378	0.070638	0.0364065	1	0	cyclin_A2
ENSG00000148848	1.26918	0.12389	9.27102e-07	0.00555162	0.00286128	1	1	ADAM_metallopeptidase_domain_12
ENSG00000107262	1.26524	0.877364	0.000246884	0.0225538	0.0116241	1	1	BCL2-associated_athanogene
ENSG00000178999	1.26161	0.592458	0.000316382	0.0243296	0.0125394	1	1	aurora_kinase_B
ENSG00000164122	1.26082	0.439357	0.00235054	0.0493995	0.0254603	1	1	ankyrin_repeat_and_SOCS_box_containing_5
ENSG00000087586	1.26049	0.368204	0.000126815	0.0199114	0.0102623	1	1	aurora_kinase_A
ENSG00000065328	1.25994	0.434314	0.0012603	0.0399549	0.0205926	1	1	minichromosome_maintenance_complex_component_10
ENSG00000100342	1.25934	1.29598	0.000608976	0.0300966	0.0155116	1	1	apolipoprotein_L,_1
ENSG00000185774	1.25847	-0.171816	2.45124e-05	0.011004	0.00567141	1	1	Kv_channel_interacting_protein_4
ENSG00000131480	1.25543	0.0114482	0.00183415	0.0459563	0.0236857	1	1	amine_oxidase,_copper_containing_2_(retina-specific)
ENSG00000089685	1.25112	0.312464	0.000248383	0.0225538	0.0116241	1	1	baculoviral_IAP_repeat_containing_5
ENSG00000196550	1.24638	0.24217	0.000904708	0.0345242	0.0177936	1	1	family_with_sequence_similarity_72,_member_A
ENSG00000187193	1.24246	0.00742111	0.000154444	0.0203764	0.0105019	1	1	metallothionein_1X
ENSG00000100629	1.23698	0.126207	0.000156944	0.0203764	0.0105019	1	1	centrosomal_protein_128kDa
ENSG00000115267	1.2363	2.65687	0.00309572	0.0567098	0.029228	1	0	interferon_induced_with_helicase_C_domain_1
ENSG00000134057	1.2359	0.555799	0.00215755	0.0483287	0.0249084	1	1	cyclin_B1
ENSG00000124134	1.23456	0.452332	0.00200864	0.0477337	0.0246017	1	1	potassium_voltage-gated_channel,_delayed-rectifier,_subfamily_S,_member_1
ENSG00000150667	1.22956	0.162385	0.00134076	0.0411433	0.0212051	1	1	fibrous_sheath_interacting_protein_1
ENSG00000123485	1.22227	0.416959	0.00129838	0.0402936	0.0207672	1	1	Holliday_junction_recognition_protein
ENSG00000183856	1.21142	0.385358	0.00167495	0.0452084	0.0233002	1	1	IQ_motif_containing_GTPase_activating_protein_3
ENSG00000203797	1.20848	0.608922	0.0100815	0.0942821	0.0485926	1	0	D-aspartate_oxidase
ENSG00000166851	1.20675	0.448424	0.00127911	0.0399872	0.0206092	1	1	polo-like_kinase_1
ENSG00000092853	1.20221	0.492888	0.000138947	0.0200384	0.0103277	1	1	claspin
ENSG00000227036	1.202	0.107592	0.00227558	0.0493127	0.0254155	1	1	no_fct
ENSG00000163874	1.20104	0.321004	0.000150251	0.0203764	0.0105019	1	1	zinc_finger_CCCH-type_containing_12A
ENSG00000158246	1.19964	-0.183362	0.000239906	0.0225474	0.0116208	1	1	family_with_sequence_similarity_46,_member_B
ENSG00000163535	1.19453	0.413977	0.00215396	0.0483287	0.0249084	1	1	shugoshin-like_2_(S._pombe)
ENSG00000137496	1.19351	0.891526	0.000184942	0.0213251	0.0109909	1	1	interleukin_18_binding_protein
ENSG00000231290	1.19017	0.536105	0.000671642	0.0310767	0.0160168	1	1	no_fct
ENSG00000129195	1.18817	0.422286	0.00261261	0.0518682	0.0267326	1	0	family_with_sequence_similarity_64,_member_A
ENSG00000071539	1.18728	0.461205	0.000589594	0.0298674	0.0153935	1	1	thyroid_hormone_receptor_interactor_13
ENSG00000138166	1.17868	0.615625	0.00505604	0.0702307	0.0361966	1	0	dual_specificity_phosphatase_5
ENSG00000117525	1.17842	0.0961363	0.000399025	0.0262726	0.0135408	1	1	coagulation_factor_III_(thromboplastin,_tissue_factor)
ENSG00000196584	1.17357	0.258741	8.37019e-05	0.0157853	0.00813569	1	1	X-ray_repair_complementing_defective_repair_in_Chinese_hamster_cells_2
ENSG00000131153	1.17268	0.379402	0.000339216	0.0245161	0.0126355	1	1	GINS_complex_subunit_2_(Psf2_homolog)
ENSG00000139278	1.16887	0.430191	0.000309107	0.0241474	0.0124455	1	1	GLI_pathogenesis-related_1
ENSG00000239332	1.16796	-0.287501	7.10831e-05	0.0147469	0.00760046	1	1	no_fct
ENSG00000235878	1.1676	0.517577	0.00577248	0.0740306	0.0381551	1	0	Uncharacterized_protein
ENSG00000147166	1.1639	-0.247547	5.58188e-05	0.0134608	0.00693762	1	1	integrin_beta_1_binding_protein_(melusin)_2
ENSG00000101057	1.16151	0.446529	0.00111435	0.0379224	0.019545	1	1	v-myb_myeloblastosis_viral_oncogene_homolog_(avian)-like_2
ENSG00000184551	1.15905	0.0155788	0.000999604	0.0360988	0.0186052	1	1	no_fct
ENSG00000127564	1.15752	0.452575	0.00062723	0.0303075	0.0156204	1	1	protein_kinase,_membrane_associated_tyrosine/threonine_1
ENSG00000177409	1.15411	1.85005	0.00554275	0.072823	0.0375327	1	0	sterile_alpha_motif_domain_containing_9-like
ENSG00000120708	1.15357	0.482814	0.00365892	0.060917	0.0313963	1	0	transforming_growth_factor,_beta-induced,_68kDa
ENSG00000109819	1.15104	1.17726	0.00779914	0.0837497	0.0431642	1	0	peroxisome_proliferator-activated_receptor_gamma,_coactivator_1_alpha
ENSG00000164611	1.15095	0.403003	0.00162032	0.0444779	0.0229237	1	1	pituitary_tumor-transforming_1
ENSG00000146094	1.14717	0.41511	0.000231266	0.0222348	0.0114597	1	1	docking_protein_3
ENSG00000117650	1.14638	0.43004	0.00513314	0.0707009	0.0364389	1	0	NIMA_(never_in_mitosis_gene_a)-related_kinase_2
ENSG00000139618	1.14497	0.652668	0.00225815	0.0492432	0.0253797	1	1	breast_cancer_2,_early_onset
ENSG00000123219	1.14298	0.324556	0.0002076	0.0218085	0.01124	1	1	centromere_protein_K
ENSG00000132141	1.14192	-0.0569849	3.337e-05	0.0122718	0.00632484	1	1	chaperonin_containing_TCP1,_subunit_6B_(zeta_2)
ENSG00000154654	1.13822	-0.0166903	0.00158145	0.04426	0.0228114	1	1	neural_cell_adhesion_molecule_2
ENSG00000138182	1.13337	0.271295	0.000462036	0.0274054	0.0141246	1	1	kinesin_family_member_20B
ENSG00000158683	1.13089	-1.15185	0.00209779	0.0480036	0.0247409	1	1	polycystic_kidney_disease_1_like_1
ENSG00000124216	1.13077	0.155296	0.00608516	0.0755382	0.038932	1	0	snail_homolog_1_(Drosophila)
ENSG00000253864	1.1277	-0.436956	0.0030169	0.0560425	0.0288841	1	0	no_fct
ENSG00000235859	1.12645	-0.0174457	0.000396183	0.0262516	0.01353	1	1	no_fct
ENSG00000124875	1.12292	0.422151	0.00755305	0.0828245	0.0426874	1	0	chemokine_(C-X-C_motif)_ligand_6_(granulocyte_chemotactic_protein_2)
ENSG00000172244	1.11722	0.281583	0.00074623	0.0320966	0.0165425	1	1	chromosome_5_open_reading_frame_34
ENSG00000100479	1.11665	0.428571	0.00911869	0.0894836	0.0461195	1	0	polymerase_(DNA_directed),_epsilon_2_(p59_subunit)
ENSG00000137807	1.11525	0.363362	0.00107401	0.0376312	0.019395	1	1	kinesin_family_member_23
ENSG00000163507	1.11481	0.280543	8.65617e-05	0.0159165	0.00820332	1	1	KIAA1524
ENSG00000138160	1.11394	0.247865	0.00111191	0.0379224	0.019545	1	1	kinesin_family_member_11
ENSG00000146670	1.11321	0.552912	0.000720937	0.0314688	0.0162189	1	1	cell_division_cycle_associated_5
ENSG00000135476	1.11109	0.346201	0.00136098	0.0412784	0.0212747	1	1	extra_spindle_pole_bodies_homolog_1_(S._cerevisiae)
ENSG00000041982	1.1089	0.32045	0.000191229	0.0213251	0.0109909	1	1	tenascin_C
ENSG00000237399	1.1086	-0.0673201	0.00532941	0.0715289	0.0368657	1	0	no_fct
ENSG00000170961	1.10396	0.810385	0.00116526	0.0387805	0.0199873	1	1	hyaluronan_synthase_2
ENSG00000011426	1.10353	0.322442	0.00400039	0.0634113	0.0326819	1	0	anillin,_actin_binding_protein
ENSG00000161921	1.10237	0.964471	0.000362138	0.0252467	0.013012	1	1	chemokine_(C-X-C_motif)_ligand_16
ENSG00000141052	1.10206	-0.760219	0.00559996	0.0729429	0.0375944	1	0	myocardin
ENSG00000234964	1.10123	0.641012	0.00961043	0.0922175	0.0475285	1	0	fatty_acid_binding_protein_5_pseudogene_7
ENSG00000137331	1.1007	0.272634	0.000128592	0.0199114	0.0102623	1	1	immediate_early_response_3
ENSG00000196503	1.10061	0.831301	0.00989179	0.0934543	0.0481659	1	0	ADP-ribosylation_factor-like_9
ENSG00000197261	1.09938	0.576867	0.00240448	0.0498946	0.0257155	1	1	chromosome_6_open_reading_frame_141
ENSG00000066279	1.0914	-0.0346159	0.00522001	0.0709838	0.0365847	1	0	asp_(abnormal_spindle)_homolog,_microcephaly_associated_(Drosophila)
ENSG00000215386	1.08388	-0.0340073	0.00897534	0.0888831	0.04581	1	0	chromosome_21_open_reading_frame_34
ENSG00000203760	1.08251	0.260222	0.000292146	0.0235469	0.012136	1	1	no_fct
ENSG00000123975	1.08203	0.510077	0.00165723	0.0448948	0.0231386	1	1	CDC28_protein_kinase_regulatory_subunit_2
ENSG00000182836	1.08188	0.305955	0.00328904	0.058297	0.030046	1	0	phosphatidylinositol-specific_phospholipase_C,_X_domain_containing_3
ENSG00000068079	1.0803	1.64964	0.000847241	0.0341051	0.0175776	1	1	interferon-induced_protein_35
ENSG00000139354	1.07987	0.192775	5.09098e-05	0.0134608	0.00693762	1	1	growth_arrest-specific_2_like_3
ENSG00000198826	1.07534	0.260481	0.000595009	0.0298674	0.0153935	1	1	Rho_GTPase_activating_protein_11A
ENSG00000232110	1.07506	0.25534	0.00399987	0.0634113	0.0326819	1	0	no_fct
ENSG00000214575	1.07063	0.442444	0.00197987	0.0475174	0.0244902	1	1	cytoplasmic_polyadenylation_element_binding_protein_1
ENSG00000138035	1.06996	1.44883	0.0049219	0.0696688	0.035907	1	0	polyribonucleotide_nucleotidyltransferase_1
ENSG00000246203	1.06881	-0.0342691	0.00923367	0.0899519	0.0463608	1	0	no_fct
ENSG00000168811	1.06769	0.565074	5.7374e-05	0.0135761	0.00699705	1	1	interleukin_12A_(natural_killer_cell_stimulatory_factor_1,_cytotoxic_lymphocyte_maturation_factor_1,_p35)
ENSG00000136514	1.05754	1.78306	0.000686555	0.031267	0.0161149	1	1	receptor_(chemosensory)_transporter_protein_4
ENSG00000117266	1.05572	1.10214	0.00401183	0.0634899	0.0327224	1	0	cyclin-dependent_kinase_18
ENSG00000165304	1.05203	0.618528	0.00190807	0.0463928	0.0239107	1	1	maternal_embryonic_leucine_zipper_kinase
ENSG00000181544	1.05009	0.115709	0.00186895	0.0460179	0.0237174	1	1	Fanconi_anemia,_complementation_group_B
ENSG00000168685	1.04961	0.107037	0.0017937	0.0458935	0.0236533	1	1	interleukin_7_receptor
ENSG00000122641	1.04359	0.486319	0.000203753	0.0217189	0.0111938	1	1	inhibin,_beta_A
ENSG00000185480	1.04055	0.0907843	0.000930842	0.0348078	0.0179398	1	1	chromosome_12_open_reading_frame_48
ENSG00000216490	1.03871	1.38745	0.00125257	0.0399549	0.0205926	1	1	interferon,_gamma-inducible_protein_30
ENSG00000165997	1.0359	0.452395	0.00681407	0.0796509	0.0410517	1	0	ADP-ribosylation_factor-like_5B
ENSG00000162924	1.03344	0.0255875	0.00604886	0.0753002	0.0388094	1	0	v-rel_reticuloendotheliosis_viral_oncogene_homolog_(avian)
ENSG00000088325	1.03034	0.335566	0.000491642	0.0278156	0.014336	1	1	TPX2,_microtubule-associated,_homolog_(Xenopus_laevis)
ENSG00000138798	1.02766	0.62561	0.00522124	0.0709838	0.0365847	1	0	epidermal_growth_factor
ENSG00000041353	1.02622	0.363976	0.00726174	0.0815822	0.0420471	1	0	RAB27B,_member_RAS_oncogene_family
ENSG00000163545	1.0243	0.347401	0.000114653	0.0196557	0.0101305	1	1	NUAK_family,_SNF1-like_kinase,_2
ENSG00000104419	1.02372	0.328081	0.00174663	0.0456413	0.0235233	1	1	N-myc_downstream_regulated_1
ENSG00000105825	1.02291	0.504088	0.000410836	0.0264344	0.0136242	1	1	tissue_factor_pathway_inhibitor_2
ENSG00000117399	1.01847	0.336618	0.00819408	0.085358	0.0439931	1	0	cell_division_cycle_20_homolog_(S._cerevisiae)
ENSG00000123609	1.0171	0.990507	0.0022452	0.0490741	0.0252926	1	1	N-myc_(and_STAT)_interactor
ENSG00000181938	1.01707	0.378196	0.000135496	0.0200384	0.0103277	1	1	GINS_complex_subunit_3_(Psf3_homolog)
ENSG00000232926	1.01667	0.0608998	0.00028094	0.0235469	0.012136	1	1	no_fct
ENSG00000196083	1.01638	0.693476	0.000896099	0.0343271	0.0176921	1	1	interleukin_1_receptor_accessory_protein
ENSG00000198355	1.01575	0.0196247	0.000551659	0.0288787	0.0148839	1	1	pim-3_oncogene
ENSG00000125347	1.01406	0.752829	2.91978e-05	0.0111792	0.0057617	1	1	interferon_regulatory_factor_1
ENSG00000204642	1.01397	1.44498	0.00427968	0.0655771	0.0337982	1	0	major_histocompatibility_complex,_class_I,_F
ENSG00000204267	1.01123	1.08888	0.000708613	0.0314364	0.0162022	1	1	transporter_2,_ATP-binding_cassette,_sub-family_B_(MDR/TAP)
ENSG00000157456	1.01081	0.329523	0.00406212	0.0637034	0.0328325	1	0	cyclin_B2
ENSG00000125968	1.0096	-0.137935	0.00167016	0.0451619	0.0232763	1	1	inhibitor_of_DNA_binding_1,_dominant_negative_helix-loop-helix_protein
ENSG00000154146	1.00827	0.00885055	0.00660545	0.0786134	0.040517	1	0	neurogranin_(protein_kinase_C_substrate,_RC3)
ENSG00000149548	1.00761	0.193752	0.00137304	0.0413166	0.0212944	1	1	coiled-coil_domain_containing_15
ENSG00000198768	1.00733	0.440004	0.0018882	0.0460179	0.0237174	1	1	adenomatosis_polyposis_coli_down-regulated_1-like
ENSG00000111674	1.00377	0.55184	0.000531785	0.0283016	0.0145865	1	1	enolase_2_(gamma,_neuronal)
ENSG00000105559	1.00259	1.16693	0.00275871	0.0539386	0.0277997	1	0	pleckstrin_homology_domain_containing,_family_A_(phosphoinositide_binding_specific)_member_4
ENSG00000167617	-1.00186	-0.329237	0.0011333	0.0380614	0.0196167	1	1	CDC42_effector_protein_(Rho_GTPase_binding)_5
ENSG00000145287	-1.00396	-0.576905	0.0104714	0.0960352	0.0494962	1	0	placenta-specific_8
ENSG00000102760	-1.00485	-0.155788	0.000124537	0.0199114	0.0102623	1	1	chromosome_13_open_reading_frame_15
ENSG00000131634	-1.00557	-0.413728	0.00476378	0.0684717	0.03529	1	0	transmembrane_protein_204
ENSG00000203727	-1.00726	-0.47492	0.00452814	0.0673876	0.0347313	1	0	sterile_alpha_motif_domain_containing_5
ENSG00000133247	-1.01048	-0.506562	0.00461327	0.0675909	0.034836	1	0	suppressor_of_variegation_4-20_homolog_2_(Drosophila)
ENSG00000231351	-1.01405	-0.176804	0.00294809	0.0555815	0.0286465	1	0	no_fct
ENSG00000100307	-1.01458	-0.539833	0.00060445	0.0300387	0.0154818	1	1	chromobox_homolog_7
ENSG00000235865	-1.01642	-0.436817	2.4686e-05	0.011004	0.00567141	1	1	no_fct
ENSG00000187955	-1.01662	-0.0695169	0.000407534	0.0264344	0.0136242	1	1	collagen,_type_XIV,_alpha_1
ENSG00000232677	-1.01663	-0.191949	0.00156567	0.04426	0.0228114	1	1	no_fct
ENSG00000166816	-1.01942	-0.444746	0.000308621	0.0241474	0.0124455	1	1	lactate_dehydrogenase_D
ENSG00000129422	-1.01982	-0.170953	0.000501483	0.027849	0.0143533	1	1	microtubule_associated_tumor_suppressor_1
ENSG00000106948	-1.02329	-0.257244	0.00459366	0.0675728	0.0348267	1	0	AT-hook_transcription_factor
ENSG00000125378	-1.02482	-0.253294	0.00756194	0.0828245	0.0426874	1	0	bone_morphogenetic_protein_4
ENSG00000245849	-1.02545	-0.222041	2.38153e-05	0.011004	0.00567141	1	1	no_fct
ENSG00000164845	-1.0278	-0.328074	0.000863143	0.0341385	0.0175949	1	1	no_fct
ENSG00000103485	-1.02867	0.0900161	0.0034014	0.0592147	0.030519	1	0	quinolinate_phosphoribosyltransferase
ENSG00000161664	-1.03118	-0.376343	0.00120045	0.0393289	0.0202699	1	1	ankyrin_repeat_and_SOCS_box_containing_16
ENSG00000185585	-1.03216	-0.0175175	0.000227721	0.022038	0.0113583	1	1	olfactomedin-like_2A
ENSG00000120875	-1.03358	0.23593	0.000693096	0.0314364	0.0162022	1	1	dual_specificity_phosphatase_4
ENSG00000123243	-1.03415	-0.232251	0.000310256	0.0241474	0.0124455	1	1	inter-alpha_(globulin)_inhibitor_H5
ENSG00000147059	-1.03674	-0.0933894	0.00481075	0.0688843	0.0355027	1	0	spindlin_family,_member_2A
ENSG00000100100	-1.04619	-0.0475252	0.000235664	0.0223653	0.011527	1	1	phosphoinositide-3-kinase_interacting_protein_1
ENSG00000174669	-1.05119	-0.0981008	3.52676e-05	0.012313	0.00634608	1	1	solute_carrier_family_29_(nucleoside_transporters),_member_2
ENSG00000099251	-1.05154	0.165584	0.000197997	0.021551	0.0111073	1	1	hydroxysteroid_(17-beta)_dehydrogenase_7_pseudogene_2
ENSG00000111110	-1.0537	-0.551508	0.0100453	0.0941978	0.0485491	1	0	protein_phosphatase,_Mg2+/Mn2+_dependent,_1H
ENSG00000246549	-1.05677	-0.116173	0.000582639	0.0298628	0.0153911	1	1	no_fct
ENSG00000227775	-1.05712	-0.525724	0.00375144	0.0615794	0.0317377	1	0	no_fct
ENSG00000091972	-1.06537	-0.476506	0.00671704	0.0791313	0.0407839	1	0	CD200_molecule
ENSG00000207561	-1.06766	-0.242908	0.00915076	0.0896746	0.0462179	1	0	microRNA_635
ENSG00000121769	-1.06787	1.00561	0.000127912	0.0199114	0.0102623	1	1	fatty_acid_binding_protein_3,_muscle_and_heart_(mammary-derived_growth_inhibitor)
ENSG00000106511	-1.07141	0.0396794	1.17218e-05	0.00865406	0.00446027	1	1	mesenchyme_homeobox_2
ENSG00000205795	-1.07772	-0.503215	0.00205281	0.0478289	0.0246508	1	1	cystin_1
ENSG00000255620	-1.07803	-0.0422262	0.00588336	0.0743507	0.03832	1	0	no_fct
ENSG00000224546	-1.0897	-0.676622	0.00474564	0.0684717	0.03529	1	0	no_fct
ENSG00000053702	-1.09154	-0.33399	0.0041322	0.0643905	0.0331866	1	0	nuclear_receptor_interacting_protein_2
ENSG00000174428	-1.09164	-0.432131	0.00317636	0.0576132	0.0296936	1	0	GTF2I_repeat_domain_containing_2B
ENSG00000113319	-1.0995	0.402857	0.00898572	0.0888904	0.0458137	1	0	Ras_protein-specific_guanine_nucleotide-releasing_factor_2
ENSG00000232888	-1.10067	-0.359474	0.00782852	0.0837876	0.0431838	1	0	ribosomal_protein_S11_pseudogene_5
ENSG00000206262	-1.10631	-0.408739	0.000513939	0.028207	0.0145378	1	1	chromosome_3_open_reading_frame_72
ENSG00000152977	-1.1091	-0.339692	0.00046806	0.0275747	0.0142119	1	1	Zic_family_member_1
ENSG00000226287	-1.11369	0.0657752	0.000125068	0.0199114	0.0102623	1	1	transmembrane_protein_191A
ENSG00000137098	-1.11867	-0.269683	0.00689728	0.080018	0.0412409	1	0	sperm_associated_antigen_8
ENSG00000253716	-1.11969	-0.213971	0.00028614	0.0235469	0.012136	1	1	no_fct
ENSG00000198915	-1.12156	0.00591541	0.00507075	0.0703686	0.0362676	1	0	RasGEF_domain_family,_member_1A
ENSG00000152726	-1.13479	-0.289395	0.00467718	0.0681287	0.0351132	1	0	family_with_sequence_similarity_21,_member_B
ENSG00000102452	-1.14023	-0.93281	0.00516441	0.0709694	0.0365773	1	0	sodium_leak_channel,_non-selective
ENSG00000134508	-1.14144	-0.390952	3.52487e-07	0.00518509	0.00267237	1	1	Cdk5_and_Abl_enzyme_substrate_1
ENSG00000197497	-1.14793	-0.0641304	0.00221874	0.0486061	0.0250514	1	1	zinc_finger_protein_665
ENSG00000155962	-1.166	0.365669	0.00846049	0.0866951	0.0446823	1	0	chloride_intracellular_channel_2
ENSG00000244041	-1.16699	-0.634101	6.24027e-05	0.0139082	0.00716825	1	1	no_fct
ENSG00000213862	-1.16826	-0.696514	0.00941338	0.0910992	0.0469521	1	0	no_fct
ENSG00000180938	-1.17882	0.220238	0.000315083	0.0243296	0.0125394	1	1	zinc_finger_protein_572
ENSG00000162817	-1.18255	-0.401051	0.00367324	0.060917	0.0313963	1	0	chromosome_1_open_reading_frame_115
ENSG00000143786	-1.18628	0.00787542	0.00404642	0.0636608	0.0328105	1	0	cornichon_homolog_3_(Drosophila)
ENSG00000166448	-1.1864	-0.561159	0.00379135	0.0618216	0.0318626	1	0	transmembrane_protein_130
ENSG00000177570	-1.20782	-0.908602	0.00105809	0.0374996	0.0193272	1	1	sterile_alpha_motif_domain_containing_12
ENSG00000226194	-1.20971	-0.689814	0.00359434	0.060638	0.0312525	1	0	no_fct
ENSG00000171385	-1.21013	-0.767656	0.000422393	0.0264344	0.0136242	1	1	potassium_voltage-gated_channel,_Shal-related_subfamily,_member_3
ENSG00000248233	-1.21086	-0.517126	0.0004293	0.0264344	0.0136242	1	1	no_fct
ENSG00000164684	-1.22096	-0.412325	0.00109956	0.0378267	0.0194957	1	1	zinc_finger_protein_704
ENSG00000173275	-1.22915	-0.295181	2.04995e-06	0.00555162	0.00286128	1	1	zinc_finger_protein_449
ENSG00000196275	-1.23525	-0.404439	0.000524718	0.028207	0.0145378	1	1	GTF2I_repeat_domain_containing_2
ENSG00000215099	-1.23776	-0.399967	0.000487039	0.0277688	0.0143119	1	1	Uncharacterized_protein
ENSG00000204947	-1.23883	-0.532671	0.000117705	0.0199016	0.0102572	1	1	zinc_finger_protein_425
ENSG00000231767	-1.24419	-0.432685	0.000987663	0.0359298	0.018518	1	1	no_fct
ENSG00000101265	-1.24666	-0.298492	0.000342275	0.0245161	0.0126355	1	1	Ras_association_(RalGDS/AF-6)_domain_family_member_2
ENSG00000235776	-1.2477	-0.708107	0.00254171	0.051358	0.0264697	1	0	no_fct
ENSG00000104213	-1.25404	0.619181	1.86761e-05	0.010989	0.00566369	1	1	platelet-derived_growth_factor_receptor-like
ENSG00000229917	-1.25533	-0.822001	0.00704603	0.080409	0.0414424	1	0	no_fct
ENSG00000166897	-1.25688	-0.350058	3.5143e-05	0.012313	0.00634608	1	1	extracellular_leucine-rich_repeat_and_fibronectin_type_III_domain_containing_2
ENSG00000138769	-1.26615	-0.368655	8.40982e-06	0.00865406	0.00446027	1	1	cyclin-dependent_kinase-like_2_(CDC2-related_kinase)
ENSG00000143816	-1.26718	-0.346933	0.00230912	0.0493512	0.0254354	1	1	wingless-type_MMTV_integration_site_family,_member_9A
ENSG00000171345	-1.26881	-0.409884	0.000332651	0.0244139	0.0125828	1	1	keratin_19
ENSG00000177363	-1.26894	-0.511068	0.000121825	0.0199114	0.0102623	1	1	LRRN4_C-terminal_like
ENSG00000169184	-1.27847	-0.291104	0.000346568	0.0245161	0.0126355	1	1	meningioma_(disrupted_in_balanced_translocation)_1
ENSG00000188825	-1.27899	-0.650195	0.000457556	0.0272496	0.0140443	1	1	no_fct
ENSG00000149809	-1.28456	0.0908726	0.00010993	0.0192508	0.00992178	1	1	transmembrane_7_superfamily_member_2
ENSG00000248855	-1.28959	-0.338241	0.00281593	0.0544314	0.0280537	1	0	no_fct
ENSG00000188783	-1.28961	-0.460351	0.000254397	0.0227289	0.0117144	1	1	proline/arginine-rich_end_leucine-rich_repeat_protein
ENSG00000224781	-1.29241	-0.170057	0.0039298	0.0631578	0.0325513	1	0	no_fct
ENSG00000162913	-1.29529	-0.407558	0.00188495	0.0460179	0.0237174	1	1	no_fct
ENSG00000165879	-1.29817	-0.709152	0.00181564	0.0458935	0.0236533	1	1	frequently_rearranged_in_advanced_T-cell_lymphomas
ENSG00000101115	-1.29836	-0.596767	0.000185066	0.0213251	0.0109909	1	1	sal-like_4_(Drosophila)
ENSG00000102032	-1.30011	-0.0703898	0.00186472	0.0460179	0.0237174	1	1	renin_binding_protein
ENSG00000169174	-1.30242	0.720881	0.0011006	0.0378267	0.0194957	1	1	proprotein_convertase_subtilisin/kexin_type_9
ENSG00000176428	-1.30341	-0.199172	0.00196517	0.0473896	0.0244244	1	1	vacuolar_protein_sorting_37_homolog_D_(S._cerevisiae)
ENSG00000241556	-1.30748	-0.0857875	0.00849911	0.0868298	0.0447517	1	0	no_fct
ENSG00000148053	-1.30786	-0.512581	0.0069193	0.080018	0.0412409	1	0	neurotrophic_tyrosine_kinase,_receptor,_type_2
ENSG00000223803	-1.31044	-0.433013	0.00834573	0.0860306	0.0443398	1	0	no_fct
ENSG00000214376	-1.31386	-0.417893	0.00134787	0.0411433	0.0212051	1	1	V-set_and_transmembrane_domain_containing_5
ENSG00000174963	-1.33644	-0.683528	0.00484167	0.0689003	0.0355109	1	0	Zic_family_member_4
ENSG00000231884	-1.34535	-0.101797	0.00318828	0.0577581	0.0297683	1	0	no_fct
ENSG00000213757	-1.35368	-0.354749	0.00868772	0.0877834	0.0452432	1	0	no_fct
ENSG00000231259	-1.35624	-0.573288	0.00283595	0.0544749	0.0280761	1	0	no_fct
ENSG00000174059	-1.35698	-0.467351	0.00350114	0.0600255	0.0309369	1	0	CD34_molecule
ENSG00000255306	-1.37609	-0.476498	0.000340873	0.0245161	0.0126355	1	1	no_fct
ENSG00000185112	-1.37673	-0.366346	3.62911e-05	0.012313	0.00634608	1	1	family_with_sequence_similarity_43,_member_A
ENSG00000170577	-1.37865	-0.591091	1.03758e-05	0.00865406	0.00446027	1	1	SIX_homeobox_2
ENSG00000164056	-1.39076	-0.0944222	0.00145461	0.0425394	0.0219246	1	1	sprouty_homolog_1,_antagonist_of_FGF_signaling_(Drosophila)
ENSG00000203709	-1.39235	-0.616242	5.58196e-05	0.0134608	0.00693762	1	1	no_fct
ENSG00000254428	-1.39839	-0.294399	0.000489986	0.0278156	0.014336	1	1	no_fct
ENSG00000225783	-1.40815	-0.383037	0.000217696	0.0218085	0.01124	1	1	no_fct
ENSG00000130518	-1.41134	-0.633713	0.00079388	0.0328033	0.0169067	1	1	KIAA1683
ENSG00000226360	-1.42251	-0.910728	0.00407301	0.0638062	0.0328854	1	0	ribosomal_protein_L10a_pseudogene_6
ENSG00000103888	-1.42342	-0.748214	2.26443e-06	0.00555162	0.00286128	1	1	KIAA1199
ENSG00000224892	-1.43441	-0.6933	0.00399943	0.0634113	0.0326819	1	0	no_fct
ENSG00000143028	-1.43533	-0.706049	0.00118384	0.0389582	0.0200789	1	1	synaptophysin-like_2
ENSG00000256338	-1.44807	-0.937706	0.0104895	0.0960776	0.049518	1	0	no_fct
ENSG00000197971	-1.46013	-0.104141	2.22596e-05	0.011004	0.00567141	1	1	myelin_basic_protein
ENSG00000176532	-1.46268	-0.060291	0.000423667	0.0264344	0.0136242	1	1	proline_rich_15
ENSG00000235065	-1.46448	-0.831948	0.00945956	0.0914259	0.0471205	1	0	no_fct
ENSG00000159388	-1.48695	-0.4147	4.84274e-06	0.00712367	0.00367151	1	1	BTG_family,_member_2
ENSG00000162998	-1.48798	-0.00929881	0.00184749	0.0459839	0.0236999	1	1	frizzled-related_protein
ENSG00000215210	-1.49014	-0.767656	0.00697947	0.0801748	0.0413217	1	0	no_fct
ENSG00000229891	-1.49904	-0.284916	0.00133019	0.0411433	0.0212051	1	1	no_fct
ENSG00000152154	-1.50607	-0.0509946	0.000996912	0.0360988	0.0186052	1	1	transmembrane_protein_178
ENSG00000238120	-1.51318	-0.972974	0.00326775	0.0582496	0.0300216	1	0	no_fct
ENSG00000236650	-1.54834	-0.733561	0.00268013	0.052919	0.0272742	1	0	no_fct
ENSG00000158258	-1.55945	0.158741	0.00176944	0.0458935	0.0236533	1	1	calsyntenin_2
ENSG00000168918	-1.5832	-0.0746264	0.00226539	0.0492956	0.0254067	1	1	inositol_polyphosphate-5-phosphatase,_145kDa
ENSG00000152092	-1.58893	0.00435302	0.00450681	0.0672365	0.0346534	1	0	astrotactin_1
ENSG00000126950	-1.58924	-0.451196	0.000543101	0.0286345	0.0147581	1	1	transmembrane_protein_35
ENSG00000244009	-1.63007	-0.397902	0.00481274	0.0688843	0.0355027	1	0	no_fct
ENSG00000228218	-1.67409	-0.152131	0.0088474	0.0881146	0.0454139	1	0	no_fct
ENSG00000213574	-1.68468	1.99834	0.00923331	0.0899519	0.0463608	1	0	no_fct
ENSG00000159871	-1.69563	0.255427	9.39361e-05	0.0170593	0.00879227	1	1	LY6/PLAUR_domain_containing_5
ENSG00000105991	-1.73484	-0.0713024	2.17053e-05	0.011004	0.00567141	1	1	homeobox_A1
ENSG00000217130	-1.76588	-1.25207	0.00999037	0.0940232	0.0484592	1	0	no_fct
ENSG00000198348	-1.78449	-0.400075	0.00523309	0.0710136	0.0366001	1	0	no_fct
ENSG00000185008	-1.8239	-0.412712	0.000220568	0.0218085	0.01124	1	1	roundabout,_axon_guidance_receptor,_homolog_2_(Drosophila)
ENSG00000157404	-1.82897	-0.114663	3.76673e-05	0.012313	0.00634608	1	1	v-kit_Hardy-Zuckerman_4_feline_sarcoma_viral_oncogene_homolog
ENSG00000255495	-1.86532	-0.737034	0.00909313	0.089352	0.0460517	1	0	no_fct
ENSG00000087076	-1.87303	-0.510837	0.0008024	0.0329701	0.0169927	1	1	hydroxysteroid_(17-beta)_dehydrogenase_14
ENSG00000123700	-1.88888	-0.498967	0.000211303	0.0218085	0.01124	1	1	potassium_inwardly-rectifying_channel,_subfamily_J,_member_2
ENSG00000233899	-1.89837	-0.705935	0.000192811	0.0213251	0.0109909	1	1	no_fct
ENSG00000203827	-1.97417	-1.26202	0.00338514	0.0592147	0.030519	1	0	neuroblastoma_breakpoint_family,_member_16
ENSG00000186496	-1.98835	-0.620882	4.06584e-05	0.0124337	0.00640825	1	1	zinc_finger_protein_396
ENSG00000175886	-2.05131	-0.776607	0.000414141	0.0264344	0.0136242	1	1	no_fct
ENSG00000152042	-2.05441	-1.65223	0.000675556	0.0310767	0.0160168	1	1	no_fct
ENSG00000100078	-2.08858	0.85124	1.63962e-05	0.0100495	0.00517949	1	1	phospholipase_A2,_group_III
ENSG00000013293	-2.13662	-0.661342	4.40063e-05	0.0126928	0.00654181	1	1	solute_carrier_family_7_(orphan_transporter),_member_14
ENSG00000086696	-2.18308	-0.840343	0.00071	0.0314364	0.0162022	1	1	hydroxysteroid_(17-beta)_dehydrogenase_2
ENSG00000237991	-2.67502	-1.30791	0.00807676	0.0849881	0.0438025	1	0	no_fct
ENSG00000105997	-2.7342	-0.56755	0.000184193	0.0213251	0.0109909	1	1	homeobox_A3
ENSG00000143869	-2.74076	-0.740641	4.27813e-06	0.00712367	0.00367151	1	1	growth_differentiation_factor_7
ENSG00000250030	-2.84947	-1.73518	0.0102387	0.0951042	0.0490163	1	0	no_fct
ENSG00000213260	-2.92106	-1.10679	0.00379979	0.0618216	0.0318626	1	0	no_fct
ENSG00000158445	-2.98979	-0.612741	3.6857e-05	0.012313	0.00634608	1	1	potassium_voltage-gated_channel,_Shab-related_subfamily,_member_1
ENSG00000235449	-3.02874	-1.11172	0.00209844	0.0480036	0.0247409	1	1	no_fct
ENSG00000252318	-3.1941	-3.53987	0.000909582	0.0345689	0.0178167	1	1	no_fct
ENSG00000213599	-3.7325	-2.80849	1.70747e-06	0.00555162	0.00286128	1	1	sulfotransferase_family,_cytosolic,_1A,_phenol-preferring,_member_3
ENSG00000204775	-6.59966	-0.813582	3.99433e-05	0.0124337	0.00640825	1	1	KM-PA-2_proteinUncharacterized_protein
ENSG00000232561	3.21737	-2.45281	0.0245327	0.143943	0.0741877	0	0	general_transcription_factor_IIi,_pseudogene_1
ENSG00000182774	3.14349	-1.7895	0.225285	0.449919	0.231886	0	0	ribosomal_protein_S17-like
ENSG00000225338	2.94449	3.79056	0.0233881	0.141255	0.072802	0	0	no_fct
ENSG00000196604	2.72186	3.12851	0.0434241	0.191076	0.0984799	0	0	POTE_ankyrin_domain_family,_member_F
ENSG00000169508	2.49337	0.279214	0.0130206	0.106526	0.054903	0	0	G_protein-coupled_receptor_183
ENSG00000213087	2.41532	3.19408	0.0550458	0.216619	0.111645	0	0	no_fct
ENSG00000076716	2.29977	2.54564	0.0540686	0.214495	0.11055	0	0	glypican_4
ENSG00000216624	2.28378	2.40076	0.0214379	0.135112	0.0696363	0	0	no_fct
ENSG00000243802	2.15931	3.41763	0.0191183	0.127675	0.0658034	0	0	no_fct
ENSG00000104267	2.15206	3.60129	0.0300802	0.157796	0.0813273	0	0	carbonic_anhydrase_II
ENSG00000171855	2.12804	2.63966	0.0172064	0.121331	0.0625335	0	0	interferon,_beta_1,_fibroblast
ENSG00000157766	1.99936	-0.722308	0.0172462	0.121442	0.0625905	0	0	aggrecan
ENSG00000227184	1.91064	0.377439	0.0734491	0.251498	0.129621	0	0	no_fct
ENSG00000108753	1.84644	3.69636	0.0874844	0.275153	0.141813	0	0	HNF1_homeobox_B
ENSG00000162692	1.8297	-0.455332	0.0261341	0.149121	0.0768562	0	0	vascular_cell_adhesion_molecule_1
ENSG00000152936	1.82025	0.172461	0.0129968	0.10639	0.0548328	0	0	intermediate_filament_tail_domain_containing_1
ENSG00000231831	1.81185	1.67741	0.0132105	0.107297	0.0553003	0	0	no_fct
ENSG00000125384	1.76289	0.904936	0.0182751	0.124737	0.0642888	0	0	prostaglandin_E_receptor_2_(subtype_EP2),_53kDa
ENSG00000174808	1.6617	2.04996	0.0357679	0.173245	0.0892898	0	0	betacellulin
ENSG00000237749	1.60817	1.88312	0.0683659	0.241688	0.124565	0	0	no_fct
ENSG00000240950	1.60685	1.45533	0.0749266	0.254543	0.13119	0	0	no_fct
ENSG00000010030	1.51864	1.99735	0.0121233	0.102716	0.0529392	0	0	ets_variant_7
ENSG00000225101	1.50912	1.71858	0.0404418	0.184184	0.0949276	0	0	olfactory_receptor,_family_52,_subfamily_K,_member_3_pseudogene
ENSG00000137558	1.47158	-1.16567	0.0283377	0.154388	0.079571	0	0	peptidase_inhibitor_15
ENSG00000243403	1.44954	3.60412	0.205676	0.429919	0.221578	0	0	no_fct
ENSG00000136275	1.42149	-0.871632	0.0111278	0.0989065	0.050976	0	0	chromosome_7_open_reading_frame_69
ENSG00000154608	1.40798	-0.000226668	0.027671	0.152793	0.078749	0	0	centrosomal_protein_170kDa_pseudogene_1
ENSG00000006016	1.39324	0.493937	0.0259371	0.148369	0.0764686	0	0	cytokine_receptor-like_factor_1
ENSG00000244722	1.38509	3.82511	0.114563	0.317142	0.163454	0	0	no_fct
ENSG00000135333	1.35473	3.90153	0.266998	0.493533	0.254365	0	0	EPH_receptor_A7
ENSG00000186871	1.34699	0.544942	0.0198022	0.129631	0.0668112	0	0	excision_repair_cross-complementing_rodent_repair_deficiency,_complementation_group_6-like
ENSG00000183578	1.34577	0.972501	0.0179665	0.123672	0.0637402	0	0	tumor_necrosis_factor,_alpha-induced_protein_8-like_3
ENSG00000236090	1.34034	1.1484	0.168379	0.389688	0.200844	0	0	no_fct
ENSG00000169245	1.33354	2.43122	0.113138	0.314723	0.162207	0	0	chemokine_(C-X-C_motif)_ligand_10
ENSG00000133401	1.3243	1.65346	0.0226417	0.138975	0.0716272	0	0	PDZ_domain_containing_2
ENSG00000128564	1.31424	1.68379	0.177219	0.399964	0.20614	0	0	VGF_nerve_growth_factor_inducible
ENSG00000214018	1.29453	1.18072	0.111396	0.311588	0.160591	0	0	no_fct
ENSG00000236686	1.27749	1.66728	0.110684	0.310717	0.160142	0	0	no_fct
ENSG00000205426	1.27061	-0.0571186	0.0641156	0.233704	0.12045	0	0	keratin_81
ENSG00000183426	1.24673	-0.433741	0.0230716	0.140473	0.0723992	0	0	nuclear_pore_complex_interacting_protein
ENSG00000202198	1.23977	1.02002	0.134586	0.345572	0.178106	0	0	RNA,_7SK_small_nuclear
ENSG00000173762	1.23314	0.216674	0.0205848	0.13194	0.0680013	0	0	CD7_molecule
ENSG00000145428	1.23037	-0.0368572	0.0118035	0.101645	0.0523875	0	0	ring_finger_protein_175
ENSG00000105664	1.22645	0.39867	0.0640177	0.233615	0.120404	0	0	cartilage_oligomeric_matrix_protein
ENSG00000132854	1.21171	-0.375547	0.064563	0.234439	0.120829	0	0	KN_motif_and_ankyrin_repeat_domains_4
ENSG00000121858	1.20303	3.50618	0.071116	0.247075	0.127342	0	0	tumor_necrosis_factor_(ligand)_superfamily,_member_10
ENSG00000168280	1.19252	1.05767	0.0119732	0.102179	0.0526628	0	0	kinesin_family_member_5C
ENSG00000167207	1.19022	1.1415	0.0504294	0.206634	0.106498	0	0	nucleotide-binding_oligomerization_domain_containing_2
ENSG00000121075	1.18961	0.38478	0.0441535	0.192789	0.0993628	0	0	T-box_4
ENSG00000138646	1.18465	4.38633	0.0108312	0.0980157	0.0505169	0	0	hect_domain_and_RLD_5
ENSG00000234106	1.18444	0.774778	0.029132	0.155943	0.0803723	0	0	no_fct
ENSG00000172183	1.17104	1.92508	0.0133022	0.107751	0.0555342	0	0	interferon_stimulated_exonuclease_gene_20kDa
ENSG00000228318	1.1672	2.52684	0.0612314	0.228161	0.117593	0	0	no_fct
ENSG00000064205	1.14327	0.0622536	0.060741	0.227601	0.117304	0	0	WNT1_inducible_signaling_pathway_protein_2
ENSG00000228328	1.14046	1.5268	0.0587653	0.224122	0.115511	0	0	no_fct
ENSG00000177294	1.1295	0.68243	0.131778	0.341805	0.176165	0	0	F-box_protein_39
ENSG00000215007	1.1276	2.48781	0.0669378	0.23882	0.123087	0	0	no_fct
ENSG00000145423	1.12495	-0.0653636	0.0989437	0.29304	0.151032	0	0	secreted_frizzled-related_protein_2
ENSG00000130303	1.12401	3.50999	0.0497002	0.20473	0.105517	0	0	bone_marrow_stromal_cell_antigen_2
ENSG00000233380	1.12307	3.5881	0.146318	0.360645	0.185875	0	0	no_fct
ENSG00000131203	1.11289	3.54578	0.0346993	0.170199	0.0877197	0	0	indoleamine_2,3-dioxygenase_1
ENSG00000121211	1.11094	0.3911	0.0123196	0.103378	0.0532805	0	0	meiotic_nuclear_divisions_1_homolog_(S._cerevisiae)
ENSG00000149212	1.10281	0.177775	0.0661039	0.237516	0.122414	0	0	sestrin_3
ENSG00000236570	1.09979	0.417638	0.0447895	0.194123	0.10005	0	0	no_fct
ENSG00000175768	1.09398	0.145584	0.0242962	0.143467	0.0739423	0	0	translocase_of_outer_mitochondrial_membrane_5_homolog_(yeast)
ENSG00000215284	1.09113	1.69662	0.260127	0.486085	0.250526	0	0	no_fct
ENSG00000214402	1.08605	-0.387452	0.146538	0.36084	0.185975	0	0	lipocalin-like_1
ENSG00000159212	1.08118	0.661508	0.0137879	0.10981	0.0565958	0	0	chloride_intracellular_channel_6
ENSG00000248180	1.07901	1.36704	0.130317	0.340309	0.175394	0	0	no_fct
ENSG00000174640	1.07864	-0.172169	0.0221425	0.137491	0.0708624	0	0	solute_carrier_organic_anion_transporter_family,_member_2A1
ENSG00000256356	1.07148	1.33005	0.0447377	0.194053	0.100014	0	0	no_fct
ENSG00000150048	1.07143	0.184832	0.038992	0.180255	0.0929027	0	0	C-type_lectin_domain_family_1,_member_A
ENSG00000225486	1.0704	0.330198	0.048382	0.202162	0.104193	0	0	no_fct
ENSG00000240135	1.0652	1.53817	0.0637882	0.23324	0.120211	0	0	no_fct
ENSG00000250221	1.06205	2.08927	0.127255	0.33505	0.172684	0	0	no_fct
ENSG00000225963	1.06199	1.27682	0.0606195	0.227601	0.117304	0	0	no_fct
ENSG00000217289	1.06194	0.0268023	0.103728	0.300539	0.154897	0	0	no_fct
ENSG00000118526	1.061	0.218981	0.0149104	0.113938	0.0587234	0	0	transcription_factor_21
ENSG00000134198	1.05415	0.311261	0.0127973	0.105666	0.05446	0	0	tetraspanin_2
ENSG00000167077	1.0491	-0.290592	0.0712556	0.247443	0.127531	0	0	meiosis_inhibitor_1
ENSG00000111863	1.04506	0.0641891	0.0125564	0.104386	0.0538003	0	0	chromosome_6_open_reading_frame_105
ENSG00000186417	1.04456	-0.244312	0.010861	0.0980157	0.0505169	0	0	gliomedin
ENSG00000014257	1.03889	0.75467	0.0250687	0.14547	0.0749748	0	0	acid_phosphatase,_prostate
ENSG00000241634	1.031	0.0656639	0.021582	0.135582	0.0698782	0	0	no_fct
ENSG00000237176	1.02972	1.51108	0.266691	0.493152	0.254168	0	0	no_fct
ENSG00000138587	1.02085	-0.0195871	0.0215034	0.135292	0.0697287	0	0	meiosis-specific_nuclear_structural_1
ENSG00000134716	1.01337	1.17654	0.0924919	0.283331	0.146028	0	0	cytochrome_P450,_family_2,_subfamily_J,_polypeptide_2
ENSG00000111335	1.00411	4.31629	0.0569216	0.220695	0.113745	0	0	2'-5'-oligoadenylate_synthetase_2,_69/71kDa
ENSG00000183763	1.00052	0.450374	0.0107054	0.0972861	0.0501409	0	0	TRAF_interacting_protein
ENSG00000213199	0.996952	0.28095	0.00329332	0.058297	0.030046	0	0	amiloride-sensitive_cation_channel_3
ENSG00000140488	0.994558	-0.110876	0.134886	0.345817	0.178233	0	0	CUGBP,_Elav-like_family_member_6
ENSG00000119737	0.994355	0.137668	0.00156697	0.04426	0.0228114	0	0	G_protein-coupled_receptor_75
ENSG00000186638	0.992942	0.437587	0.00530886	0.0714486	0.0368243	0	0	kinesin_family_member_24
ENSG00000081059	0.990896	-0.112312	0.000592644	0.0298674	0.0153935	0	0	transcription_factor_7_(T-cell_specific,_HMG-box)
ENSG00000085840	0.990247	0.842758	0.00212117	0.0480036	0.0247409	0	0	origin_recognition_complex,_subunit_1
ENSG00000130176	0.989796	0.152915	0.000132623	0.0200384	0.0103277	0	0	calponin_1,_basic,_smooth_muscle
ENSG00000154451	0.988321	1.65123	0.140354	0.35277	0.181816	0	0	guanylate_binding_protein_5
ENSG00000186076	0.983835	-0.362332	0.599929	0.769194	0.396439	0	0	no_fct
ENSG00000214765	0.982124	-0.0612406	0.000450346	0.0271499	0.013993	0	0	septin_7_pseudogene_2
ENSG00000104147	0.98209	0.378777	0.0338536	0.168296	0.0867388	0	0	Opa_interacting_protein_5
ENSG00000135299	0.980834	-0.16413	0.0274602	0.152143	0.0784138	0	0	ankyrin_repeat_domain_6
ENSG00000109339	0.98067	-0.104596	0.000226392	0.022038	0.0113583	0	0	mitogen-activated_protein_kinase_10
ENSG00000160886	0.978407	0.190948	0.0057166	0.0736995	0.0379844	0	0	lymphocyte_antigen_6_complex,_locus_K
ENSG00000100526	0.977522	0.23552	0.00186003	0.0460179	0.0237174	0	0	cyclin-dependent_kinase_inhibitor_3
ENSG00000118507	0.976794	0.591164	0.000919258	0.0345838	0.0178244	0	0	A_kinase_(PRKA)_anchor_protein_7
ENSG00000123358	0.976659	0.221241	0.00786427	0.0840112	0.043299	0	0	nuclear_receptor_subfamily_4,_group_A,_member_1
ENSG00000161800	0.975662	0.343433	0.00161018	0.0444779	0.0229237	0	0	Rac_GTPase_activating_protein_1
ENSG00000102554	0.974295	0.137202	0.000381299	0.0258475	0.0133217	0	0	Kruppel-like_factor_5_(intestinal)
ENSG00000169252	0.973756	1.2422	0.000250673	0.0226221	0.0116593	0	0	adrenergic,_beta-2-,_receptor,_surface
ENSG00000085999	0.972677	0.533308	0.000157851	0.0203764	0.0105019	0	0	RAD54-like_(S._cerevisiae)
ENSG00000099822	0.972377	-0.285493	0.00454021	0.0674464	0.0347616	0	0	hyperpolarization_activated_cyclic_nucleotide-gated_potassium_channel_2
ENSG00000214783	0.970319	0.0448275	0.0584884	0.223529	0.115206	0	0	polymerase_(RNA)_II_(DNA_directed)_polypeptide_J4,_pseudogene
ENSG00000172167	0.970268	0.197484	0.00408649	0.0638812	0.0329241	0	0	Mdm2,_transformed_3T3_cell_double_minute_2,_p53_binding_protein_(mouse)_binding_protein,_104kDa
ENSG00000164109	0.968916	0.63882	0.00444735	0.0669191	0.0344898	0	0	MAD2_mitotic_arrest_deficient-like_1_(yeast)
ENSG00000164949	0.968778	0.394926	0.00321911	0.0580308	0.0299088	0	0	GTP_binding_protein_overexpressed_in_skeletal_muscle
ENSG00000164105	0.968653	0.367085	0.000557724	0.0290926	0.0149942	0	0	Sin3A-associated_protein,_30kDa
ENSG00000151692	0.968574	0.721798	0.0488189	0.202861	0.104553	0	0	ring_finger_protein_144A
ENSG00000059804	0.967276	0.292315	2.54744e-05	0.0110214	0.00568039	0	0	solute_carrier_family_2_(facilitated_glucose_transporter),_member_3
ENSG00000183876	0.964091	0.285113	0.000186871	0.0213251	0.0109909	0	0	arylsulfatase_family,_member_I
ENSG00000175911	0.96347	0.138501	0.0560334	0.218634	0.112683	0	0	Uncharacterized_protein
ENSG00000169248	0.962614	1.4193	0.349981	0.570336	0.293949	0	0	chemokine_(C-X-C_motif)_ligand_11
ENSG00000134986	0.961576	-0.152571	0.00297158	0.0556131	0.0286627	0	0	chromosome_5_open_reading_frame_13
ENSG00000138658	0.960137	0.160071	0.00134814	0.0411433	0.0212051	0	0	chromosome_4_open_reading_frame_21
ENSG00000237870	0.958404	-0.259487	0.0381076	0.178353	0.0919221	0	0	no_fct
ENSG00000166592	0.958393	0.486474	0.00779098	0.0837497	0.0431642	0	0	Ras-related_associated_with_diabetes
ENSG00000212232	0.957484	-0.0311165	0.00425788	0.0654476	0.0337314	0	0	small_nucleolar_RNA,_C/D_box_17
ENSG00000206530	0.955118	0.00410614	0.017898	0.123425	0.0636128	0	0	WD_repeat_domain_52
ENSG00000151014	0.954864	0.584211	0.00183861	0.0459563	0.0236857	0	0	CCR4_carbon_catabolite_repression_4-like_(S._cerevisiae)
ENSG00000100292	0.95423	-0.182922	0.0116849	0.101109	0.0521112	0	0	heme_oxygenase_(decycling)_1
ENSG00000255725	0.9539	0.23887	0.0115039	0.100369	0.0517299	0	0	no_fct
ENSG00000047936	0.953601	0.0601887	0.0164502	0.118654	0.0611536	0	0	c-ros_oncogene_1_,_receptor_tyrosine_kinase
ENSG00000027075	0.953075	-0.0584819	0.0204689	0.131729	0.0678926	0	0	protein_kinase_C,_eta
ENSG00000171860	0.95241	1.51685	0.0602683	0.226923	0.116955	0	0	complement_component_3a_receptor_1
ENSG00000184635	0.952047	0.609152	0.0191337	0.127675	0.0658034	0	0	zinc_finger_protein_93
ENSG00000115844	0.949249	-0.155284	0.218415	0.442302	0.227961	0	0	distal-less_homeobox_2
ENSG00000165259	0.948771	0.569104	0.00201696	0.047824	0.0246483	0	0	highly_divergent_homeobox
ENSG00000198901	0.947283	0.373927	0.00140448	0.0417371	0.0215111	0	0	protein_regulator_of_cytokinesis_1
ENSG00000134321	0.946284	5.3405	0.00494744	0.0696688	0.035907	0	0	radical_S-adenosyl_methionine_domain_containing_2
ENSG00000128578	0.945593	0.512689	0.000581291	0.0298628	0.0153911	0	0	family_with_sequence_similarity_40,_member_B
ENSG00000166278	0.945084	-0.083253	0.0963394	0.289329	0.149119	0	0	complement_component_2
ENSG00000177989	0.942962	1.29113	0.0215124	0.135292	0.0697287	0	0	outer_dense_fiber_of_sperm_tails_3B
ENSG00000144554	0.942301	0.339568	0.00313802	0.0570585	0.0294077	0	0	Fanconi_anemia,_complementation_group_D2
ENSG00000095637	0.94202	0.767797	0.168184	0.389403	0.200696	0	0	sorbin_and_SH3_domain_containing_1
ENSG00000118515	0.93943	0.241165	0.00203657	0.047824	0.0246483	0	0	serum/glucocorticoid_regulated_kinase_1
ENSG00000137877	0.938503	1.15329	0.001246	0.0399549	0.0205926	0	0	spectrin,_beta,_non-erythrocytic_5
ENSG00000186193	0.938042	0.37399	0.00156056	0.04426	0.0228114	0	0	chromosome_9_open_reading_frame_140
ENSG00000078401	0.937816	0.641872	0.00603791	0.0753002	0.0388094	0	0	endothelin_1
ENSG00000167604	0.93698	0.171545	0.000856373	0.0341385	0.0175949	0	0	nuclear_factor_of_kappa_light_polypeptide_gene_enhancer_in_B-cells_inhibitor,_delta
ENSG00000096060	0.936014	0.255881	0.00126603	0.0399642	0.0205974	0	0	FK506_binding_protein_5
ENSG00000120129	0.935462	0.144827	1.1378e-05	0.00865406	0.00446027	0	0	dual_specificity_phosphatase_1
ENSG00000079616	0.934263	0.33154	0.00170493	0.0454298	0.0234143	0	0	kinesin_family_member_22
ENSG00000135604	0.934178	0.473682	0.00918967	0.0898385	0.0463024	0	0	syntaxin_11
ENSG00000149201	0.933397	0.221271	0.00141844	0.0419824	0.0216376	0	0	coiled-coil_domain_containing_81
ENSG00000224596	0.932537	-0.0395572	0.0249811	0.145323	0.0748989	0	0	no_fct
ENSG00000068489	0.932121	0.300615	0.00444109	0.0669191	0.0344898	0	0	proline_rich_11
ENSG00000101003	0.931525	0.564098	0.00280471	0.0544314	0.0280537	0	0	GINS_complex_subunit_1_(Psf1_homolog)
ENSG00000254270	0.931127	1.3025	0.336859	0.557765	0.28747	0	0	no_fct
ENSG00000225355	0.930768	0.845457	0.03096	0.160247	0.0825906	0	0	no_fct
ENSG00000230750	0.92841	1.10343	0.18263	0.405203	0.20884	0	0	no_fct
ENSG00000168496	0.927652	0.456349	0.00211319	0.0480036	0.0247409	0	0	flap_structure-specific_endonuclease_1
ENSG00000185885	0.927504	1.81044	0.000611537	0.0300966	0.0155116	0	0	interferon_induced_transmembrane_protein_1_(9-27)
ENSG00000075702	0.924189	0.48919	0.00206508	0.0478383	0.0246556	0	0	WD_repeat_domain_62
ENSG00000118777	0.922929	0.832432	0.0508203	0.207427	0.106907	0	0	ATP-binding_cassette,_sub-family_G_(WHITE),_member_2
ENSG00000179841	0.921525	0.0907809	0.0122706	0.103326	0.0532536	0	0	A_kinase_(PRKA)_anchor_protein_5
ENSG00000161888	0.920737	0.257968	0.0136474	0.109439	0.0564041	0	0	SPC24,_NDC80_kinetochore_complex_component,_homolog_(S._cerevisiae)
ENSG00000122952	0.919856	0.427388	0.0012534	0.0399549	0.0205926	0	0	ZW10_interactor
ENSG00000177465	0.919275	-0.0195171	0.00493489	0.0696688	0.035907	0	0	acyl-CoA_thioesterase_4
ENSG00000144655	0.919261	0.499036	0.00258079	0.0515808	0.0265845	0	0	cysteine-serine-rich_nuclear_protein_1
ENSG00000236105	0.913027	1.48966	0.0538123	0.213651	0.110115	0	0	no_fct
ENSG00000129173	0.913019	0.551583	0.0518819	0.209324	0.107885	0	0	E2F_transcription_factor_8
ENSG00000147180	0.912031	0.19019	0.000651094	0.0308955	0.0159234	0	0	zinc_finger_protein_711
ENSG00000173567	0.911751	0.0549283	0.00642723	0.0774785	0.0399321	0	0	G_protein-coupled_receptor_113
ENSG00000172296	0.911013	0.273566	0.0289229	0.155596	0.0801936	0	0	serine_palmitoyltransferase,_long_chain_base_subunit_3
ENSG00000213689	0.909721	1.38571	2.79563e-05	0.0111145	0.00572837	0	0	three_prime_repair_exonuclease_1
ENSG00000233461	0.909576	0.347042	0.013185	0.107243	0.0552728	0	0	no_fct
ENSG00000214826	0.908024	0.110906	0.0015721	0.04426	0.0228114	0	0	DEAD/H_(Asp-Glu-Ala-Asp/His)_box_polypeptide_12
ENSG00000165949	0.907247	3.52225	0.0120093	0.102292	0.0527206	0	0	interferon,_alpha-inducible_protein_27
ENSG00000100162	0.906752	0.408149	0.00082749	0.0336254	0.0173304	0	0	centromere_protein_M
ENSG00000248546	0.906273	0.877548	0.0508506	0.207493	0.106941	0	0	acidic_(leucine-rich)_nuclear_phosphoprotein_32_family,_member_C
ENSG00000136108	0.904666	0.19467	0.00236053	0.0494261	0.025474	0	0	cytoskeleton_associated_protein_2
ENSG00000231878	0.90307	0.337005	0.159441	0.377472	0.194547	0	0	no_fct
ENSG00000175505	0.902976	-0.134463	0.0103862	0.0957876	0.0493685	0	0	cardiotrophin-like_cytokine_factor_1
ENSG00000250071	0.902945	1.10936	0.0173405	0.121698	0.0627227	0	0	no_fct
ENSG00000172345	0.901696	0.582839	7.06999e-05	0.0147469	0.00760046	0	0	StAR-related_lipid_transfer_(START)_domain_containing_5
ENSG00000187741	0.901541	0.347314	0.000939476	0.0348982	0.0179864	0	0	Fanconi_anemia,_complementation_group_A
ENSG00000180385	0.900162	0.11295	0.000470702	0.0275747	0.0142119	0	0	no_fct
ENSG00000152268	0.899375	-0.115066	0.000206536	0.0218085	0.01124	0	0	spondin_1,_extracellular_matrix_protein
ENSG00000012048	0.898345	0.365881	0.00327858	0.058297	0.030046	0	0	breast_cancer_1,_early_onset
ENSG00000210196	0.89814	0.152152	0.000292865	0.0235469	0.012136	0	0	no_fct
ENSG00000188610	0.896311	0.435556	0.00788547	0.0841155	0.0433528	0	0	family_with_sequence_similarity_72,_member_B
ENSG00000079215	0.896294	1.23289	0.00625794	0.0767119	0.039537	0	0	solute_carrier_family_1_(glial_high_affinity_glutamate_transporter),_member_3
ENSG00000184445	0.895176	0.231203	0.00214331	0.0483287	0.0249084	0	0	kinetochore_associated_1
ENSG00000248113	0.894153	0.544359	0.069033	0.243174	0.125331	0	0	no_fct
ENSG00000219699	0.89411	0.487418	0.202613	0.426166	0.219644	0	0	no_fct
ENSG00000255052	0.893665	-0.25063	0.0191252	0.127675	0.0658034	0	0	family_with_sequence_similarity_66,_member_D
ENSG00000237240	0.89353	0.168644	0.00531893	0.071463	0.0368317	0	0	no_fct
ENSG00000143452	0.892094	-0.319344	0.00928752	0.0901184	0.0464466	0	0	HORMA_domain_containing_1
ENSG00000100302	0.892001	-0.161458	0.156533	0.373921	0.192717	0	0	RASD_family,_member_2
ENSG00000204396	0.891548	-0.0207495	0.00289541	0.0550277	0.028361	0	0	chromosome_6_open_reading_frame_27
ENSG00000253173	0.890899	1.56978	0.259161	0.485329	0.250136	0	0	no_fct
ENSG00000132639	0.88972	0.687135	0.0231579	0.140629	0.0724797	0	0	synaptosomal-associated_protein,_25kDa
ENSG00000120647	0.889211	0.336649	0.00559381	0.0729429	0.0375944	0	0	coiled-coil_domain_containing_77
ENSG00000112029	0.8891	0.321614	0.00107987	0.0376312	0.019395	0	0	F-box_protein_5
ENSG00000100906	0.888442	0.238878	0.000632522	0.0303075	0.0156204	0	0	nuclear_factor_of_kappa_light_polypeptide_gene_enhancer_in_B-cells_inhibitor,_alpha
ENSG00000119969	0.887959	0.314556	0.00216102	0.0483287	0.0249084	0	0	helicase,_lymphoid-specific
ENSG00000079385	0.887709	1.57216	0.318872	0.543246	0.279987	0	0	carcinoembryonic_antigen-related_cell_adhesion_molecule_1_(biliary_glycoprotein)
ENSG00000013810	0.88767	0.282659	0.000445974	0.026997	0.0139142	0	0	transforming,_acidic_coiled-coil_containing_protein_3
ENSG00000240065	0.887651	1.34085	0.00699671	0.0801748	0.0413217	0	0	proteasome_(prosome,_macropain)_subunit,_beta_type,_9_(large_multifunctional_peptidase_2)
ENSG00000177602	0.887026	0.418354	0.00385363	0.0622943	0.0321062	0	0	germ_cell_associated_2_(haspin)
ENSG00000134627	0.886274	0.159943	0.0404631	0.184219	0.0949457	0	0	piwi-like_4_(Drosophila)
ENSG00000236683	0.88383	0.501509	0.00926968	0.0900641	0.0464187	0	0	high_mobility_group_AT-hook_1_pseudogene_1
ENSG00000115415	0.88303	1.53539	0.000320035	0.0243296	0.0125394	0	0	signal_transducer_and_activator_of_transcription_1,_91kDa
ENSG00000255031	0.882642	0.259044	5.26903e-05	0.0134608	0.00693762	0	0	no_fct
ENSG00000174576	0.87985	0.543135	0.0629195	0.231792	0.119465	0	0	neuronal_PAS_domain_protein_4
ENSG00000162063	0.879353	0.143098	0.00228781	0.0493512	0.0254354	0	0	cyclin_F
ENSG00000242013	0.87827	0.0512404	0.000105865	0.0187623	0.00966999	0	0	no_fct
ENSG00000183814	0.878174	0.448718	0.0178306	0.123198	0.0634956	0	0	lin-9_homolog_(C._elegans)
ENSG00000143476	0.876978	0.466884	0.00776787	0.0837497	0.0431642	0	0	denticleless_homolog_(Drosophila)
ENSG00000229729	0.875541	0.152858	0.00549295	0.072794	0.0375177	0	0	no_fct
ENSG00000107562	0.874599	-0.321873	0.0104347	0.0960352	0.0494962	0	0	chemokine_(C-X-C_motif)_ligand_12
ENSG00000170681	0.873505	-0.0333539	0.000513873	0.028207	0.0145378	0	0	muscle-related_coiled-coil_protein
ENSG00000236654	0.873075	0.25324	0.0361477	0.173696	0.0895224	0	0	no_fct
ENSG00000225886	0.872861	3.65994	0.0118212	0.101645	0.0523875	0	0	no_fct
ENSG00000213500	0.872842	2.484	0.0922687	0.283123	0.145921	0	0	no_fct
ENSG00000006283	0.872771	0.0479028	0.249329	0.475325	0.24498	0	0	calcium_channel,_voltage-dependent,_T_type,_alpha_1G_subunit
ENSG00000235531	0.872327	0.390395	0.000771652	0.0324078	0.0167028	0	0	no_fct
ENSG00000156804	0.871504	-0.0515944	0.000661192	0.030975	0.0159644	0	0	F-box_protein_32
ENSG00000213533	0.871472	0.648102	0.0173105	0.121545	0.0626438	0	0	transmembrane_protein_110
ENSG00000169436	0.871359	0.993298	0.17071	0.391958	0.202013	0	0	collagen,_type_XXII,_alpha_1
ENSG00000218226	0.871003	0.0324026	6.7744e-05	0.0147469	0.00760046	0	0	no_fct
ENSG00000111665	0.870833	0.188578	0.000895536	0.0343271	0.0176921	0	0	cell_division_cycle_associated_3
ENSG00000165272	0.870164	0.452325	0.040031	0.18333	0.0944875	0	0	aquaporin_3_(Gill_blood_group)
ENSG00000133119	0.869539	0.253112	0.00571269	0.0736995	0.0379844	0	0	replication_factor_C_(activator_1)_3,_38kDa
ENSG00000054356	0.869044	0.687233	0.037982	0.177991	0.0917359	0	0	protein_tyrosine_phosphatase,_receptor_type,_N
ENSG00000101096	0.867714	0.601794	0.0450304	0.19488	0.10044	0	0	nuclear_factor_of_activated_T-cells,_cytoplasmic,_calcineurin-dependent_2
ENSG00000149503	0.867086	0.273637	0.00182281	0.0459136	0.0236637	0	0	inner_centromere_protein_antigens_135/155kDa
ENSG00000122483	0.866634	0.00950668	0.001736	0.0456413	0.0235233	0	0	coiled-coil_domain_containing_18
ENSG00000172061	0.866061	0.213012	0.000348325	0.0245161	0.0126355	0	0	leucine_rich_repeat_containing_15
ENSG00000179583	0.864853	0.461973	0.199645	0.422862	0.217941	0	0	class_II,_major_histocompatibility_complex,_transactivator
ENSG00000254539	0.864311	-0.0258995	0.0305018	0.158713	0.0818	0	0	no_fct
ENSG00000187583	0.863917	0.491189	0.0322458	0.164244	0.0846506	0	0	pleckstrin_homology_domain_containing,_family_N_member_1
ENSG00000169715	0.863665	0.315005	0.000153896	0.0203764	0.0105019	0	0	metallothionein_1E
ENSG00000135312	0.862533	0.102314	0.00672705	0.0791313	0.0407839	0	0	5-hydroxytryptamine_(serotonin)_receptor_1B
ENSG00000256268	0.86251	0.226419	0.000391209	0.0260393	0.0134205	0	0	no_fct
ENSG00000188687	0.862392	-0.159655	0.038864	0.17989	0.0927144	0	0	solute_carrier_family_4,_sodium_bicarbonate_cotransporter,_member_5
ENSG00000164104	0.862011	0.0918089	0.000945885	0.0350478	0.0180635	0	0	high_mobility_group_box_2
ENSG00000203667	0.861613	0.127314	0.00376324	0.0616451	0.0317716	0	0	family_with_sequence_similarity_36,_member_A
ENSG00000176435	0.859558	0.106576	0.0262568	0.14935	0.0769745	0	0	C-type_lectin_domain_family_14,_member_A
ENSG00000163017	0.859185	0.175594	0.00436063	0.0661288	0.0340825	0	0	actin,_gamma_2,_smooth_muscle,_enteric
ENSG00000128714	0.85876	0.418194	0.00457938	0.0675728	0.0348267	0	0	homeobox_D13
ENSG00000131620	0.858507	0.493721	0.417821	0.631215	0.325326	0	0	anoctamin_1,_calcium_activated_chloride_channel
ENSG00000031691	0.858472	0.339425	0.00285639	0.0546425	0.0281625	0	0	centromere_protein_Q
ENSG00000137563	0.856937	0.445234	0.0199774	0.129976	0.0669892	0	0	gamma-glutamyl_hydrolase_(conjugase,_folylpolygammaglutamyl_hydrolase)
ENSG00000128944	0.856789	0.313735	0.00153499	0.044015	0.0226851	0	0	chromosome_15_open_reading_frame_23
ENSG00000121236	0.855402	0.256332	0.00297993	0.0556986	0.0287068	0	0	tripartite_motif_containing_6
ENSG00000182010	0.854499	0.0962016	0.00142133	0.0419835	0.0216381	0	0	rhotekin_2
ENSG00000125885	0.8544	0.28241	0.00263722	0.0522121	0.0269099	0	0	minichromosome_maintenance_complex_component_8
ENSG00000253669	0.854107	-0.134616	0.00875638	0.0877834	0.0452432	0	0	no_fct
ENSG00000225131	0.854034	1.13098	0.0282593	0.154189	0.0794684	0	0	proteasome_activator_subunit_2_pseudogene_2
ENSG00000249628	0.853765	-0.496468	0.00872256	0.0877834	0.0452432	0	0	no_fct
ENSG00000166803	0.853322	0.32198	0.00138667	0.0414591	0.0213679	0	0	KIAA0101
ENSG00000170852	0.851682	0.321439	0.00106049	0.0374996	0.0193272	0	0	kelch_repeat_and_BTB_(POZ)_domain_containing_2
ENSG00000169851	0.851146	0.173336	0.0200694	0.130111	0.0670586	0	0	protocadherin_7
ENSG00000094804	0.850503	0.444947	0.0046246	0.0676515	0.0348673	0	0	cell_division_cycle_6_homolog_(S._cerevisiae)
ENSG00000239653	0.850238	-0.0842053	0.0412789	0.186548	0.0961459	0	0	no_fct
ENSG00000197445	0.849794	1.19356	0.159037	0.377153	0.194383	0	0	chromosome_16_open_reading_frame_47
ENSG00000078725	0.849014	-0.23172	0.133928	0.344903	0.177761	0	0	deleted_in_bladder_cancer_1
ENSG00000232480	0.845877	-0.150249	0.0237625	0.142208	0.0732933	0	0	no_fct
ENSG00000114529	0.844457	0.667347	0.00475873	0.0684717	0.03529	0	0	chromosome_3_open_reading_frame_52
ENSG00000173641	0.844042	-0.199379	0.00110587	0.0379192	0.0195434	0	0	heat_shock_27kDa_protein_family,_member_7_(cardiovascular)
ENSG00000113356	0.843931	0.213258	0.00508544	0.0704396	0.0363043	0	0	polymerase_(RNA)_III_(DNA_directed)_polypeptide_G_(32kD)
ENSG00000184979	0.84355	2.9404	0.0266451	0.150403	0.0775171	0	0	ubiquitin_specific_peptidase_18
ENSG00000241478	0.843148	1.49318	0.149931	0.365508	0.188381	0	0	no_fct
ENSG00000231607	0.842986	0.107016	0.0156022	0.116054	0.0598136	0	0	deleted_in_lymphocytic_leukemia_2_(non-protein_coding)
ENSG00000133874	0.842804	0.57947	0.0381891	0.178563	0.0920308	0	0	ring_finger_protein_122
ENSG00000103226	0.841394	-0.43386	0.00088778	0.0343271	0.0176921	0	0	NODAL_modulator_3
ENSG00000127507	0.840992	-0.308375	0.0262433	0.14935	0.0769745	0	0	egf-like_module_containing,_mucin-like,_hormone_receptor-like_2
ENSG00000132109	0.838895	1.31919	0.000616962	0.0302517	0.0155916	0	0	tripartite_motif_containing_21
ENSG00000214222	0.838545	2.70724	0.315735	0.540305	0.278471	0	0	no_fct
ENSG00000137965	0.837703	2.75822	0.0163484	0.118253	0.0609472	0	0	interferon-induced_protein_44
ENSG00000140534	0.837692	0.246867	0.000323587	0.0243296	0.0125394	0	0	chromosome_15_open_reading_frame_42
ENSG00000197301	0.837456	0.104476	0.0842526	0.270307	0.139315	0	0	no_fct
ENSG00000151849	0.837303	0.252038	0.00174894	0.0456413	0.0235233	0	0	centromere_protein_J
ENSG00000113368	0.837272	0.321427	0.0200581	0.130111	0.0670586	0	0	lamin_B1
ENSG00000246763	0.837087	0.316259	0.00037341	0.0256101	0.0131993	0	0	no_fct
ENSG00000107317	0.835974	0.548663	0.0765954	0.256948	0.13243	0	0	prostaglandin_D2_synthase_21kDa_(brain)
ENSG00000223749	0.833525	-0.0229854	0.000697759	0.0314364	0.0162022	0	0	no_fct
ENSG00000239672	0.833447	0.422993	0.00367171	0.060917	0.0313963	0	0	non-metastatic_cells_1,_protein_(NM23A)_expressed_in
ENSG00000145040	0.833307	0.0600318	0.00321517	0.0580308	0.0299088	0	0	urocortin_2
ENSG00000159251	0.833161	-0.619718	0.132615	0.343023	0.176793	0	0	actin,_alpha,_cardiac_muscle_1
ENSG00000183091	0.832684	0.418141	0.00209756	0.0480036	0.0247409	0	0	nebulin
ENSG00000105088	0.832471	0.523555	0.0105174	0.096213	0.0495878	0	0	olfactomedin_2
ENSG00000156587	0.831449	1.18134	0.00311845	0.0567896	0.0292691	0	0	ubiquitin-conjugating_enzyme_E2L_6
ENSG00000175592	0.830733	0.493134	0.000733194	0.0319091	0.0164458	0	0	FOS-like_antigen_1
ENSG00000243680	0.829911	1.65013	0.327274	0.549754	0.283341	0	0	no_fct
ENSG00000123689	0.82908	0.141607	0.0360513	0.173594	0.0894694	0	0	G0/G1switch_2
ENSG00000231609	0.82891	-0.359293	0.0450186	0.19488	0.10044	0	0	no_fct
ENSG00000151466	0.828213	0.457125	0.0110111	0.0985235	0.0507786	0	0	sodium_channel_and_clathrin_linker_1
ENSG00000236824	0.827551	0.117771	0.148992	0.364207	0.187711	0	0	no_fct
ENSG00000134070	0.82754	0.212598	0.00244032	0.0502761	0.0259121	0	0	interleukin-1_receptor-associated_kinase_2
ENSG00000204261	0.826092	0.872144	0.0133241	0.10781	0.0555646	0	0	no_fct
ENSG00000230606	0.824403	-0.273844	0.016122	0.117636	0.0606293	0	0	no_fct
ENSG00000106483	0.823774	-0.567636	0.110413	0.310233	0.159893	0	0	secreted_frizzled-related_protein_4
ENSG00000133107	0.822848	0.114286	0.00151047	0.0436746	0.0225097	0	0	transient_receptor_potential_cation_channel,_subfamily_C,_member_4
ENSG00000205403	0.822524	-0.378051	0.0825875	0.267414	0.137824	0	0	complement_factor_I
ENSG00000131459	0.822462	-0.0920025	5.53245e-05	0.0134608	0.00693762	0	0	glutamine-fructose-6-phosphate_transaminase_2
ENSG00000115919	0.822399	1.81453	0.347254	0.567889	0.292687	0	0	kynureninase
ENSG00000112312	0.820816	0.496666	0.00469082	0.0682512	0.0351764	0	0	geminin,_DNA_replication_inhibitor
ENSG00000226855	0.819729	2.66206	0.392532	0.608958	0.313854	0	0	no_fct
ENSG00000157445	0.819697	-0.245359	0.00390654	0.0628914	0.0324139	0	0	calcium_channel,_voltage-dependent,_alpha_2/delta_subunit_3
ENSG00000247217	0.819321	0.325982	0.000172633	0.0211577	0.0109046	0	0	no_fct
ENSG00000044524	0.818562	-0.267693	0.0173571	0.121732	0.0627403	0	0	EPH_receptor_A3
ENSG00000235275	0.816532	0.0660569	0.0597765	0.225638	0.116293	0	0	no_fct
ENSG00000138642	0.815943	2.63482	0.0246553	0.144437	0.074442	0	0	hect_domain_and_RLD_6
ENSG00000177692	0.815522	-0.141268	0.0580591	0.222821	0.114841	0	0	DnaJ_(Hsp40)_homolog,_subfamily_C,_member_28
ENSG00000008517	0.814153	0.0318102	0.0051216	0.070638	0.0364065	0	0	interleukin_32
ENSG00000165195	0.813965	0.315303	0.0152536	0.115077	0.0593102	0	0	phosphatidylinositol_glycan_anchor_biosynthesis,_class_A
ENSG00000132016	0.813323	-0.177996	0.158582	0.376614	0.194105	0	0	chromosome_19_open_reading_frame_57
ENSG00000205659	0.812602	0.149788	0.00640267	0.0774785	0.0399321	0	0	lin-52_homolog_(C._elegans)
ENSG00000240747	0.812002	0.31678	0.00521953	0.0709838	0.0365847	0	0	KRAB_box_domain_containing_1
ENSG00000153233	0.810982	0.502948	0.00278396	0.0542959	0.0279839	0	0	protein_tyrosine_phosphatase,_receptor_type,_R
ENSG00000231006	0.810175	3.0947	0.332433	0.554221	0.285643	0	0	no_fct
ENSG00000122257	0.809606	0.168595	0.00963734	0.0922351	0.0475375	0	0	retinoblastoma_binding_protein_6
ENSG00000214357	0.809295	0.115664	0.001408	0.0417575	0.0215216	0	0	neuralized_homolog_1B_(Drosophila)
ENSG00000183486	0.809269	3.7581	0.0152706	0.115077	0.0593102	0	0	myxovirus_(influenza_virus)_resistance_2_(mouse)
ENSG00000131795	0.805206	0.233124	0.000588553	0.0298674	0.0153935	0	0	RNA_binding_motif_protein_8A
ENSG00000178053	0.804636	0.0477323	0.00234314	0.0493995	0.0254603	0	0	myeloid_leukemia_factor_1
ENSG00000113810	0.804358	0.0622083	0.00101781	0.036517	0.0188207	0	0	structural_maintenance_of_chromosomes_4
ENSG00000124882	0.804267	0.392452	0.00137359	0.0413166	0.0212944	0	0	epiregulin
ENSG00000123416	0.80372	0.272069	0.00069825	0.0314364	0.0162022	0	0	tubulin,_alpha_1b
ENSG00000107201	0.803621	2.65111	0.028748	0.1553	0.0800411	0	0	DEAD_(Asp-Glu-Ala-Asp)_box_polypeptide_58
ENSG00000128510	0.803602	-0.794412	0.000196247	0.0215433	0.0111033	0	0	carboxypeptidase_A4
ENSG00000157423	0.802812	-0.011468	0.00291645	0.0551672	0.028433	0	0	hydrocephalus_inducing_homolog_(mouse)
ENSG00000121316	0.802702	0.258815	0.0256564	0.147525	0.0760338	0	0	phospholipase_B_domain_containing_1
ENSG00000003987	0.802498	-0.232927	0.00364844	0.0609101	0.0313928	0	0	myotubularin_related_protein_7
ENSG00000151952	0.802267	0.192187	0.150454	0.36619	0.188733	0	0	transmembrane_protein_132D
ENSG00000216657	0.801971	0.689158	0.0679534	0.240973	0.124197	0	0	no_fct
ENSG00000100285	0.801187	0.089005	0.0151125	0.114531	0.0590289	0	0	neurofilament,_heavy_polypeptide
ENSG00000153975	0.800745	0.245504	0.00782772	0.0837876	0.0431838	0	0	zinc_finger_with_UFM1-specific_peptidase_domain
ENSG00000135424	0.800574	0.240172	0.00691333	0.080018	0.0412409	0	0	integrin,_alpha_7
ENSG00000118785	0.799621	1.83711	0.238668	0.464349	0.239324	0	0	secreted_phosphoprotein_1
ENSG00000105409	0.799067	-0.243736	0.031981	0.163294	0.0841611	0	0	ATPase,_Na+/K+_transporting,_alpha_3_polypeptide
ENSG00000108961	0.798513	0.16095	0.125133	0.331958	0.17109	0	0	RAN_guanine_nucleotide_release_factor
ENSG00000122644	0.796698	0.196224	0.0086975	0.0877834	0.0452432	0	0	ADP-ribosylation_factor-like_4A
ENSG00000180353	0.795212	-0.125588	0.0045916	0.0675728	0.0348267	0	0	hematopoietic_cell-specific_Lyn_substrate_1
ENSG00000158050	0.794582	0.306545	0.00968642	0.0924642	0.0476556	0	0	dual_specificity_phosphatase_2
ENSG00000089472	0.794438	0.351524	0.0114275	0.100178	0.0516311	0	0	hephaestin
ENSG00000115604	0.794331	2.09954	0.246714	0.473041	0.243803	0	0	interleukin_18_receptor_1
ENSG00000167553	0.794304	0.209001	0.000481635	0.0276752	0.0142637	0	0	tubulin,_alpha_1c
ENSG00000213569	0.794119	0.375803	0.0357165	0.173167	0.0892497	0	0	no_fct
ENSG00000165731	0.793997	1.36594	0.0754276	0.255326	0.131594	0	0	ret_proto-oncogene
ENSG00000111206	0.79375	0.273187	0.00124187	0.0399549	0.0205926	0	0	forkhead_box_M1
ENSG00000128482	0.793072	-0.378278	0.00245318	0.0503042	0.0259266	0	0	ring_finger_protein_112
ENSG00000167900	0.792611	0.230041	0.00351377	0.0601018	0.0309762	0	0	thymidine_kinase_1,_soluble
ENSG00000163491	0.791851	-0.273801	0.0225703	0.138827	0.071551	0	0	NIMA_(never_in_mitosis_gene_a)-_related_kinase_10
ENSG00000223477	0.791664	-0.632785	0.0422282	0.188716	0.0972633	0	0	no_fct
ENSG00000110944	0.788548	0.626433	0.000879572	0.0341385	0.0175949	0	0	interleukin_23,_alpha_subunit_p19
ENSG00000148459	0.788205	0.23829	0.0283341	0.154388	0.079571	0	0	prenyl_(decaprenyl)_diphosphate_synthase,_subunit_1
ENSG00000164161	0.787816	0.663789	0.0710076	0.246815	0.127207	0	0	hedgehog_interacting_protein
ENSG00000134107	0.787244	0.485264	0.00757868	0.0828245	0.0426874	0	0	basic_helix-loop-helix_family,_member_e40
ENSG00000213942	0.78691	1.26525	0.132505	0.342883	0.17672	0	0	no_fct
ENSG00000164327	0.786762	0.335631	0.00476648	0.0684717	0.03529	0	0	RPTOR_independent_companion_of_MTOR,_complex_2
ENSG00000127824	0.786318	0.166379	0.0615943	0.228907	0.117978	0	0	tubulin,_alpha_4a
ENSG00000118503	0.786114	0.560796	0.00128262	0.0399872	0.0206092	0	0	tumor_necrosis_factor,_alpha-induced_protein_3
ENSG00000237510	0.785826	-0.300074	0.0655059	0.236353	0.121815	0	0	no_fct
ENSG00000135318	0.784513	0.780874	0.000123301	0.0199114	0.0102623	0	0	5'-nucleotidase,_ecto_(CD73)
ENSG00000014138	0.78402	0.502648	0.000432671	0.0264344	0.0136242	0	0	polymerase_(DNA_directed),_alpha_2_(70kD_subunit)
ENSG00000235927	0.783068	0.17484	0.0039811	0.0634113	0.0326819	0	0	no_fct
ENSG00000254461	0.782603	-0.0591563	0.0326404	0.165395	0.0852436	0	0	no_fct
ENSG00000134668	0.782281	0.144251	0.000135271	0.0200384	0.0103277	0	0	SPOC_domain_containing_1
ENSG00000148841	0.781608	0.466593	0.000872956	0.0341385	0.0175949	0	0	inositol_1,4,5-trisphosphate_receptor_interacting_protein
ENSG00000176170	0.780396	0.500594	0.0149258	0.113997	0.0587535	0	0	sphingosine_kinase_1
ENSG00000189320	0.780156	0.456691	0.0278343	0.153132	0.0789234	0	0	family_with_sequence_similarity_180,_member_A
ENSG00000224437	0.779724	0.487555	0.0890827	0.277789	0.143171	0	0	no_fct
ENSG00000109881	0.779691	0.147344	0.00144964	0.0424785	0.0218932	0	0	coiled-coil_domain_containing_34
ENSG00000150995	0.779549	0.483916	0.00383867	0.0621881	0.0320515	0	0	inositol_1,4,5-trisphosphate_receptor,_type_1
ENSG00000123473	0.779494	0.48263	0.00943147	0.0912143	0.0470114	0	0	SCL/TAL1_interrupting_locus
ENSG00000143401	0.778912	0.15901	0.00446824	0.0670008	0.0345319	0	0	acidic_(leucine-rich)_nuclear_phosphoprotein_32_family,_member_E
ENSG00000158023	0.777882	-0.0801841	0.0051036	0.0705582	0.0363654	0	0	WD_repeat_domain_66
ENSG00000224080	0.777636	0.239635	0.0167177	0.119907	0.0617996	0	0	no_fct
ENSG00000104889	0.776861	0.338154	0.000750177	0.0321723	0.0165815	0	0	ribonuclease_H2,_subunit_A
ENSG00000163131	0.776445	1.09882	0.0151375	0.114603	0.0590657	0	0	cathepsin_S
ENSG00000171621	0.776368	0.426469	0.00170372	0.0454298	0.0234143	0	0	splA/ryanodine_receptor_domain_and_SOCS_box_containing_1
ENSG00000197140	0.776042	-0.248456	0.0492983	0.203874	0.105076	0	0	ADAM_metallopeptidase_domain_32
ENSG00000163376	0.775705	0.917588	0.00435449	0.0661288	0.0340825	0	0	kelch_repeat_and_BTB_(POZ)_domain_containing_8
ENSG00000077152	0.775373	0.438688	0.0185061	0.125344	0.0646018	0	0	ubiquitin-conjugating_enzyme_E2T_(putative)
ENSG00000204138	0.774153	0.558432	0.00282438	0.0544517	0.0280642	0	0	phosphatase_and_actin_regulator_4
ENSG00000224126	0.773285	0.526811	0.0438753	0.192093	0.0990037	0	0	no_fct
ENSG00000162595	0.772903	0.470241	0.0382566	0.178674	0.0920877	0	0	DIRAS_family,_GTP-binding_RAS-like_3
ENSG00000204103	0.772619	-0.267997	0.116548	0.320212	0.165036	0	0	v-maf_musculoaponeurotic_fibrosarcoma_oncogene_homolog_B_(avian)
ENSG00000179833	0.769854	0.0656871	0.000386567	0.0258849	0.0133409	0	0	SERTA_domain_containing_2
ENSG00000181773	0.769594	0.731646	0.0278261	0.153132	0.0789234	0	0	G_protein-coupled_receptor_3
ENSG00000170381	0.76957	0.786226	0.174557	0.39693	0.204576	0	0	sema_domain,_immunoglobulin_domain_(Ig),_short_basic_domain,_secreted,_(semaphorin)_3E
ENSG00000233929	0.769003	0.177386	0.104563	0.301673	0.155481	0	0	no_fct
ENSG00000229644	0.768501	0.45333	0.0037805	0.0617902	0.0318464	0	0	nicotinamide_phosphoribosyltransferase-like
ENSG00000123095	0.768471	0.082362	0.0189024	0.126966	0.0654375	0	0	basic_helix-loop-helix_family,_member_e41
ENSG00000136630	0.767302	0.210404	0.00164183	0.044891	0.0231366	0	0	H2.0-like_homeobox
ENSG00000112877	0.767026	0.46318	0.00127421	0.0399652	0.0205979	0	0	centrosomal_protein_72kDa
ENSG00000105889	0.766597	0.350078	0.00177849	0.0458935	0.0236533	0	0	STEAP_family_member_1B
ENSG00000137310	0.766394	0.291037	0.000433586	0.0264344	0.0136242	0	0	transcription_factor_19
ENSG00000151470	0.765951	0.547796	0.00352613	0.0601035	0.0309771	0	0	chromosome_4_open_reading_frame_33
ENSG00000198133	0.765761	0.868426	0.0457915	0.195989	0.101012	0	0	transmembrane_protein_229B
ENSG00000128394	0.765282	0.471583	0.00803142	0.084971	0.0437937	0	0	apolipoprotein_B_mRNA_editing_enzyme,_catalytic_polypeptide-like_3F
ENSG00000163689	0.764639	0.119502	0.00015102	0.0203764	0.0105019	0	0	chromosome_3_open_reading_frame_67
ENSG00000100297	0.763421	0.234968	0.00633268	0.0770849	0.0397292	0	0	minichromosome_maintenance_complex_component_5
ENSG00000080839	0.762863	0.150656	0.00447793	0.0670095	0.0345364	0	0	retinoblastoma-like_1_(p107)
ENSG00000133136	0.762073	1.33585	0.138112	0.350174	0.180478	0	0	no_fct
ENSG00000170667	0.761821	0.1128	0.0311826	0.160833	0.0828928	0	0	RAS_p21_protein_activator_4B
ENSG00000196196	0.761768	-0.055543	0.0116986	0.101167	0.0521413	0	0	histidine_rich_carboxyl_terminus_1
ENSG00000144395	0.761331	0.239998	0.00361278	0.0607485	0.0313095	0	0	coiled-coil_domain_containing_150
ENSG00000170458	0.761057	-0.292768	0.189474	0.412302	0.212499	0	0	CD14_molecule
ENSG00000121988	0.760506	0.0243814	0.00353768	0.060161	0.0310067	0	0	zinc_finger,_RAN-binding_domain_containing_3
ENSG00000179965	0.760442	-0.108759	0.020294	0.130932	0.0674818	0	0	zinc_finger_protein_771
ENSG00000166451	0.759973	0.392361	0.00940869	0.0910992	0.0469521	0	0	centromere_protein_N
ENSG00000133106	0.75896	2.08094	0.0488019	0.202847	0.104546	0	0	epithelial_stromal_interaction_1_(breast)
ENSG00000157601	0.757969	4.20583	0.0597511	0.2256	0.116273	0	0	myxovirus_(influenza_virus)_resistance_1,_interferon-inducible_protein_p78_(mouse)
ENSG00000025708	0.756812	1.40859	0.00617149	0.0760961	0.0392196	0	0	thymidine_phosphorylase
ENSG00000002549	0.756806	1.36721	0.0113961	0.100157	0.0516206	0	0	leucine_aminopeptidase_3
ENSG00000196878	0.756745	-0.164167	0.00676893	0.0793394	0.0408912	0	0	laminin,_beta_3
ENSG00000123636	0.755958	-0.103692	0.0185795	0.125542	0.0647037	0	0	bromodomain_adjacent_to_zinc_finger_domain,_2B
ENSG00000224345	0.755554	0.31994	0.000521888	0.028207	0.0145378	0	0	no_fct
ENSG00000069482	0.755	0.473988	0.00188404	0.0460179	0.0237174	0	0	galanin_prepropeptide
ENSG00000133048	0.754711	-0.0623642	0.058198	0.222993	0.11493	0	0	chitinase_3-like_1_(cartilage_glycoprotein-39)
ENSG00000146410	0.752895	0.836524	0.00590753	0.0745281	0.0384114	0	0	family_with_sequence_similarity_54,_member_A
ENSG00000171877	0.752312	0.62681	0.0155747	0.116002	0.0597868	0	0	FERM_domain_containing_5
ENSG00000185745	0.751205	2.7823	0.0597461	0.2256	0.116273	0	0	interferon-induced_protein_with_tetratricopeptide_repeats_1
ENSG00000139973	0.750756	-0.611832	0.0357522	0.173245	0.0892898	0	0	synaptotagmin_XVI
ENSG00000198691	0.750584	-0.195345	0.143921	0.357313	0.184158	0	0	ATP-binding_cassette,_sub-family_A_(ABC1),_member_4
ENSG00000084628	0.750008	1.39884	0.0842455	0.270307	0.139315	0	0	Na+/K+_transporting_ATPase_interacting_1
ENSG00000182185	0.749463	0.519925	0.0124246	0.103797	0.0534964	0	0	RAD51_homolog_B_(S._cerevisiae)
ENSG00000172548	0.748189	-0.320933	0.150143	0.365831	0.188548	0	0	NIPA-like_domain_containing_4
ENSG00000146374	0.747773	3.00974	0.342334	0.563281	0.290313	0	0	R-spondin_3
ENSG00000115380	0.747693	-0.153484	0.00275244	0.0539127	0.0277863	0	0	EGF_containing_fibulin-like_extracellular_matrix_protein_1
ENSG00000248905	0.746862	0.16291	0.00340231	0.0592147	0.030519	0	0	formin_1
ENSG00000008513	0.745535	0.143406	0.000273611	0.0235469	0.012136	0	0	ST3_beta-galactoside_alpha-2,3-sialyltransferase_1
ENSG00000232977	0.744944	-0.0645421	0.00112143	0.0379224	0.019545	0	0	no_fct
ENSG00000135127	0.742693	1.85591	0.313714	0.538413	0.277496	0	0	coiled-coil_domain_containing_64
ENSG00000017427	0.741663	-0.930331	0.160707	0.379073	0.195372	0	0	insulin-like_growth_factor_1_(somatomedin_C)
ENSG00000116514	0.74032	0.897027	0.000657448	0.030975	0.0159644	0	0	ring_finger_protein_19B
ENSG00000156500	0.740039	0.486483	0.0183222	0.124828	0.064336	0	0	family_with_sequence_similarity_122C
ENSG00000139597	0.739768	-0.0946874	0.00153169	0.0440062	0.0226806	0	0	NEDD4_binding_protein_2-like_1
ENSG00000114270	0.739584	-0.0138547	0.00735201	0.0819858	0.0422551	0	0	collagen,_type_VII,_alpha_1
ENSG00000187790	0.73955	0.113873	0.00302349	0.0560425	0.0288841	0	0	Fanconi_anemia,_complementation_group_M
ENSG00000224155	0.739339	0.386561	0.00158265	0.04426	0.0228114	0	0	no_fct
ENSG00000085563	0.738396	2.32617	0.364423	0.584268	0.301129	0	0	ATP-binding_cassette,_sub-family_B_(MDR/TAP),_member_1
ENSG00000226688	0.737649	0.117458	0.0049815	0.0697221	0.0359345	0	0	no_fct
ENSG00000119139	0.736782	0.444239	0.00344286	0.0595818	0.0307082	0	0	tight_junction_protein_2_(zona_occludens_2)
ENSG00000197275	0.736678	0.151454	0.013172	0.107243	0.0552728	0	0	RAD54_homolog_B_(S._cerevisiae)
ENSG00000174130	0.736642	0.0811837	0.00970991	0.0925029	0.0476756	0	0	toll-like_receptor_6
ENSG00000242221	0.735845	-0.535265	0.092161	0.283084	0.1459	0	0	pregnancy_specific_beta-1-glycoprotein_2
ENSG00000197465	0.735764	-0.19034	0.00107449	0.0376312	0.019395	0	0	glycophorin_E_(MNS_blood_group)
ENSG00000188290	0.735318	1.31963	0.0365675	0.174281	0.0898235	0	0	hairy_and_enhancer_of_split_4_(Drosophila)
ENSG00000103196	0.734394	-0.395853	0.0024263	0.0502176	0.0258819	0	0	cysteine-rich_secretory_protein_LCCL_domain_containing_2
ENSG00000185842	0.732912	0.0459507	0.0183337	0.124828	0.064336	0	0	dynein,_axonemal,_heavy_chain_14
ENSG00000103995	0.732103	0.325063	0.00179475	0.0458935	0.0236533	0	0	centrosomal_protein_152kDa
ENSG00000182481	0.731429	0.211289	0.00333777	0.0588006	0.0303056	0	0	karyopherin_alpha_2_(RAG_cohort_1,_importin_alpha_1)
ENSG00000186230	0.731291	0.043093	0.000200713	0.021551	0.0111073	0	0	zinc_finger_protein_749
ENSG00000135439	0.730153	0.171914	0.184261	0.406742	0.209633	0	0	ArfGAP_with_GTPase_domain,_ankyrin_repeat_and_PH_domain_2
ENSG00000064655	0.729955	-0.183092	0.11445	0.317101	0.163433	0	0	eyes_absent_homolog_2_(Drosophila)
ENSG00000198157	0.729084	0.164115	0.022244	0.138005	0.0711271	0	0	high_mobility_group_nucleosome_binding_domain_5
ENSG00000207464	0.728843	-0.0354515	0.0114274	0.100178	0.0516311	0	0	small_nucleolar_RNA,_C/D_box_116-4
ENSG00000138795	0.728356	-0.247114	0.00913802	0.0896135	0.0461864	0	0	lymphoid_enhancer-binding_factor_1
ENSG00000187951	0.728342	0.409845	0.0288245	0.155564	0.0801769	0	0	Rho_GTPase_activating_protein_11B
ENSG00000113460	0.727447	0.169015	0.0194319	0.128769	0.0663672	0	0	BRX1,_biogenesis_of_ribosomes,_homolog_(S._cerevisiae)
ENSG00000125148	0.727086	0.320583	0.00111889	0.0379224	0.019545	0	0	metallothionein_2A
ENSG00000178860	0.726768	0.637946	0.0294426	0.157091	0.080964	0	0	musculin
ENSG00000235750	0.726714	0.441416	0.0273435	0.152113	0.0783982	0	0	KIAA0040
ENSG00000175471	0.72632	0.642331	0.0537428	0.213605	0.110091	0	0	multiple_C2_domains,_transmembrane_1
ENSG00000189056	0.725897	0.0679517	0.0122823	0.103326	0.0532536	0	0	reelin
ENSG00000112343	0.725701	0.739375	0.0142228	0.111228	0.0573265	0	0	tripartite_motif_containing_38
ENSG00000145681	0.725208	0.354995	0.00492604	0.0696688	0.035907	0	0	hyaluronan_and_proteoglycan_link_protein_1
ENSG00000145375	0.722709	0.197176	0.0106479	0.096925	0.0499547	0	0	spermatogenesis_associated_5
ENSG00000161912	0.722431	-0.0645622	0.0274042	0.152113	0.0783982	0	0	no_fct
ENSG00000188820	0.722419	0.7111	0.116996	0.320636	0.165254	0	0	family_with_sequence_similarity_26,_member_F
ENSG00000136383	0.721591	0.131499	0.0853888	0.271854	0.140112	0	0	alpha-kinase_3
ENSG00000228847	0.721516	1.11276	0.180693	0.403414	0.207918	0	0	no_fct
ENSG00000146918	0.72074	0.314394	0.00148003	0.0430261	0.0221755	0	0	non-SMC_condensin_II_complex,_subunit_G2
ENSG00000163006	0.719969	0.206602	0.00605064	0.0753002	0.0388094	0	0	coiled-coil_domain_containing_138
ENSG00000164591	0.718916	0.0462431	0.0210463	0.133617	0.0688658	0	0	myozenin_3
ENSG00000242349	0.718646	0.363896	0.0244459	0.14376	0.0740932	0	0	no_fct
ENSG00000188396	0.718458	-0.0189584	0.00680826	0.0796509	0.0410517	0	0	no_fct
ENSG00000164176	0.718401	0.270209	0.0528377	0.211673	0.109095	0	0	EGF-like_repeats_and_discoidin_I-like_domains_3
ENSG00000188229	0.718297	0.211513	0.00210305	0.0480036	0.0247409	0	0	tubulin,_beta_2C
ENSG00000104290	0.717988	0.11177	0.211842	0.435832	0.224626	0	0	frizzled_family_receptor_3
ENSG00000108852	0.71746	-0.0919682	0.00926425	0.0900641	0.0464187	0	0	membrane_protein,_palmitoylated_2_(MAGUK_p55_subfamily_member_2)
ENSG00000227934	0.717447	0.00450864	0.029984	0.157796	0.0813273	0	0	no_fct
ENSG00000117877	0.717179	0.411095	0.00117735	0.0389186	0.0200585	0	0	CD3e_molecule,_epsilon_associated_protein
ENSG00000109220	0.716203	0.220658	0.000235278	0.0223653	0.011527	0	0	cysteine-rich_hydrophobic_domain_2
ENSG00000235036	0.715991	-0.0154282	0.0254451	0.147072	0.0758002	0	0	no_fct
ENSG00000206337	0.715978	0.378541	0.00424281	0.0653132	0.0336621	0	0	HLA_complex_P5_(non-protein_coding)
ENSG00000183644	0.71543	-0.271655	0.0800122	0.263247	0.135677	0	0	chromosome_11_open_reading_frame_88
ENSG00000214110	0.715427	0.658526	0.0314272	0.161585	0.0832801	0	0	no_fct
ENSG00000225964	0.715058	1.78647	0.315295	0.53974	0.27818	0	0	no_fct
ENSG00000231242	0.713403	-0.401125	0.418086	0.631351	0.325396	0	0	no_fct
ENSG00000131351	0.71273	0.24067	0.00362932	0.0607485	0.0313095	0	0	HAUS_augmin-like_complex,_subunit_8
ENSG00000187642	0.712575	0.172575	0.0337484	0.167981	0.0865766	0	0	chromosome_1_open_reading_frame_170
ENSG00000165685	0.712414	-0.429041	0.0286902	0.1552	0.0799896	0	0	chromosome_12_open_reading_frame_59
ENSG00000090530	0.711474	0.237036	0.00125794	0.0399549	0.0205926	0	0	leprecan-like_1
ENSG00000096696	0.710794	0.506562	0.00440819	0.0667125	0.0343833	0	0	desmoplakin
ENSG00000111602	0.708729	0.411466	0.00221742	0.0486061	0.0250514	0	0	timeless_homolog_(Drosophila)
ENSG00000127124	0.707588	0.118029	0.0012646	0.0399642	0.0205974	0	0	human_immunodeficiency_virus_type_I_enhancer_binding_protein_3
ENSG00000059378	0.707448	1.55013	0.00562983	0.0730934	0.037672	0	0	poly_(ADP-ribose)_polymerase_family,_member_12
ENSG00000132003	0.707259	0.034695	0.00128307	0.0399872	0.0206092	0	0	zinc_finger,_SWIM-type_containing_4
ENSG00000122862	0.706211	-0.102984	0.0411378	0.186196	0.0959647	0	0	serglycin
ENSG00000101425	0.706163	0.0170764	0.140413	0.35277	0.181816	0	0	bactericidal/permeability-increasing_protein
ENSG00000124171	0.70513	0.292435	0.241631	0.467744	0.241073	0	0	par-6_partitioning_defective_6_homolog_beta_(C._elegans)
ENSG00000183668	0.704807	-0.457968	0.000626031	0.0303075	0.0156204	0	0	pregnancy_specific_beta-1-glycoprotein_9
ENSG00000115541	0.703932	0.614622	0.0163539	0.118253	0.0609472	0	0	heat_shock_10kDa_protein_1_(chaperonin_10)
ENSG00000174194	0.703812	-0.182025	0.106699	0.304471	0.156923	0	0	ArfGAP_with_GTPase_domain,_ankyrin_repeat_and_PH_domain_8
ENSG00000138675	0.702804	0.0880223	0.000161623	0.0205445	0.0105886	0	0	fibroblast_growth_factor_5
ENSG00000138346	0.702144	0.186521	0.00888597	0.0882597	0.0454887	0	0	DNA_replication_helicase_2_homolog_(yeast)
ENSG00000137135	0.702086	0.206248	0.0261113	0.149048	0.0768187	0	0	chromosome_9_open_reading_frame_100
ENSG00000197019	0.701423	0.300535	0.000917608	0.0345838	0.0178244	0	0	SERTA_domain_containing_1
ENSG00000115520	0.70123	0.357318	0.00316414	0.0574623	0.0296158	0	0	coenzyme_Q10_homolog_B_(S._cerevisiae)
ENSG00000144362	0.70094	-0.0527538	0.08967	0.2787	0.143641	0	0	phosphatase,_orphan_2
ENSG00000117475	0.700887	0.754422	0.028054	0.153577	0.0791527	0	0	basic_leucine_zipper_nuclear_factor_1
ENSG00000163918	0.70079	0.136028	0.00255305	0.0513754	0.0264787	0	0	replication_factor_C_(activator_1)_4,_37kDa
ENSG00000106415	0.700764	0.102105	0.00756704	0.0828245	0.0426874	0	0	glucocorticoid_induced_transcript_1
ENSG00000215784	0.70061	0.122267	0.21462	0.438486	0.225994	0	0	family_with_sequence_similarity_72,_member_D
ENSG00000255875	0.700565	0.768218	0.328585	0.550923	0.283943	0	0	no_fct
ENSG00000099864	0.70023	0.48135	0.188993	0.412015	0.212351	0	0	paralemmin
ENSG00000185697	0.699414	0.366078	0.0353801	0.172065	0.0886815	0	0	v-myb_myeloblastosis_viral_oncogene_homolog_(avian)-like_1
ENSG00000113361	0.69923	0.357312	0.205626	0.429919	0.221578	0	0	cadherin_6,_type_2,_K-cadherin_(fetal_kidney)
ENSG00000187605	0.699135	-0.0740129	0.00388883	0.0627245	0.0323279	0	0	tet_oncogene_family_member_3
ENSG00000255766	0.698568	-0.0298424	0.0158948	0.116878	0.0602385	0	0	no_fct
ENSG00000166035	0.698349	-0.00629524	0.12883	0.337917	0.174161	0	0	lipase,_hepatic
ENSG00000112297	0.698338	0.455053	0.00202053	0.047824	0.0246483	0	0	absent_in_melanoma_1
ENSG00000254860	0.698231	-0.506438	0.105637	0.302989	0.156159	0	0	no_fct
ENSG00000112183	0.697967	-0.0283203	0.00205578	0.0478289	0.0246508	0	0	RNA_binding_motif_protein_24
ENSG00000233251	0.697816	-0.293547	0.0107439	0.0974531	0.0502269	0	0	no_fct
ENSG00000010818	0.69751	0.127347	0.000152177	0.0203764	0.0105019	0	0	human_immunodeficiency_virus_type_I_enhancer_binding_protein_2
ENSG00000108423	0.697231	0.107447	0.0133509	0.107908	0.0556152	0	0	tubulin,_delta_1
ENSG00000101888	0.697206	0.345542	0.0100233	0.0941522	0.0485256	0	0	nuclear_transport_factor_2-like_export_factor_2
ENSG00000162702	0.697048	-0.0107042	0.00552612	0.072823	0.0375327	0	0	zinc_finger_protein_281
ENSG00000172936	0.696405	1.13827	0.00331913	0.0585424	0.0301725	0	0	myeloid_differentiation_primary_response_gene_(88)
ENSG00000133739	0.696336	-0.0329182	0.0259389	0.148369	0.0764686	0	0	leucine_rich_repeat_and_coiled-coil_domain_containing_1
ENSG00000134222	0.696139	0.229359	0.00596344	0.0747208	0.0385108	0	0	proline/serine-rich_coiled-coil_1
ENSG00000242265	0.694985	0.267594	0.0234004	0.141255	0.072802	0	0	no_fct
ENSG00000250469	0.694809	-1.10096	0.212541	0.436294	0.224864	0	0	no_fct
ENSG00000104856	0.694499	0.272314	0.0347134	0.170211	0.0877263	0	0	v-rel_reticuloendotheliosis_viral_oncogene_homolog_B
ENSG00000198604	0.69416	0.438231	0.0129395	0.106099	0.0546832	0	0	bromodomain_adjacent_to_zinc_finger_domain,_1A
ENSG00000049541	0.694101	0.243955	0.00186945	0.0460179	0.0237174	0	0	replication_factor_C_(activator_1)_2,_40kDa
ENSG00000206344	0.692433	0.0970091	0.0208674	0.13307	0.0685834	0	0	no_fct
ENSG00000185947	0.692251	0.312132	0.0420045	0.188479	0.0971413	0	0	zinc_finger_protein_267
ENSG00000221955	0.691531	-0.222209	0.000174037	0.0211577	0.0109046	0	0	solute_carrier_family_12_(potassium/chloride_transporters),_member_8
ENSG00000134802	0.69073	0.370034	0.00124748	0.0399549	0.0205926	0	0	solute_carrier_family_43,_member_3
ENSG00000081803	0.690614	0.382571	0.0112119	0.0993535	0.0512064	0	0	Ca++-dependent_secretion_activator_2
ENSG00000183171	0.690267	0.512697	0.0578048	0.222588	0.114721	0	0	no_fct
ENSG00000213452	0.689771	1.54803	0.317393	0.541756	0.279219	0	0	no_fct
ENSG00000169908	0.689607	0.562707	0.0219979	0.13706	0.07064	0	0	transmembrane_4_L_six_family_member_1
ENSG00000233452	0.689198	-0.107171	0.0229936	0.140318	0.0723194	0	0	no_fct
ENSG00000175899	0.688475	-0.578711	0.005262	0.0710928	0.0366409	0	0	alpha-2-macroglobulin
ENSG00000177822	0.687346	0.229341	0.00962085	0.0922351	0.0475375	0	0	no_fct
ENSG00000249264	0.687279	1.47989	0.328713	0.550978	0.283972	0	0	no_fct
ENSG00000133808	0.686923	-0.0401158	0.288596	0.514223	0.265028	0	0	MICAL_C-terminal_like
ENSG00000187134	0.68643	0.23691	0.0899811	0.279186	0.143891	0	0	aldo-keto_reductase_family_1,_member_C1_(dihydrodiol_dehydrogenase_1;_20-alpha_(3-alpha)-hydroxysteroid_dehydrogenase)
ENSG00000143322	0.686404	0.234582	0.00418657	0.064894	0.0334461	0	0	v-abl_Abelson_murine_leukemia_viral_oncogene_homolog_2
ENSG00000179294	0.684582	0.889671	0.0518751	0.209324	0.107885	0	0	chromosome_17_open_reading_frame_96
ENSG00000171174	0.684517	-0.105482	0.0771843	0.258041	0.132993	0	0	ribokinase
ENSG00000102384	0.684342	0.369319	0.0110304	0.0986181	0.0508273	0	0	centromere_protein_I
ENSG00000198211	0.683784	0.0359722	0.0187874	0.126424	0.0651585	0	0	no_fct
ENSG00000155090	0.683272	-0.0589786	0.00783696	0.0837876	0.0431838	0	0	Kruppel-like_factor_10
ENSG00000224138	0.683097	-0.474916	0.0239669	0.142743	0.0735691	0	0	no_fct
ENSG00000176171	0.681711	0.346288	0.0202547	0.130932	0.0674818	0	0	BCL2/adenovirus_E1B_19kDa_interacting_protein_3
ENSG00000140853	0.680619	0.704992	0.00133285	0.0411433	0.0212051	0	0	NLR_family,_CARD_domain_containing_5
ENSG00000133169	0.67963	0.283473	0.103487	0.300137	0.154689	0	0	brain_expressed,_X-linked_1
ENSG00000234176	0.678728	1.42197	0.371192	0.590104	0.304137	0	0	no_fct
ENSG00000255397	0.678084	0.470201	0.192051	0.414836	0.213805	0	0	no_fct
ENSG00000089048	0.677902	0.0880387	0.00435458	0.0661288	0.0340825	0	0	ESF1,_nucleolar_pre-rRNA_processing_protein,_homolog_(S._cerevisiae)
ENSG00000115548	0.677237	0.0929254	0.0124228	0.103797	0.0534964	0	0	lysine_(K)-specific_demethylase_3A
ENSG00000161914	0.676393	0.197122	0.000975404	0.0358705	0.0184875	0	0	zinc_finger_protein_653
ENSG00000177770	0.673809	0.201605	0.289214	0.514866	0.26536	0	0	CDKN2A_interacting_protein_N-terminal_like_pseudogene_1
ENSG00000149231	0.673617	0.178504	0.00265811	0.0525549	0.0270866	0	0	coiled-coil_domain_containing_82
ENSG00000119917	0.672974	2.80145	0.0205239	0.131837	0.0679482	0	0	interferon-induced_protein_with_tetratricopeptide_repeats_3
ENSG00000116183	0.672772	0.237652	0.098588	0.292435	0.15072	0	0	pappalysin_2
ENSG00000211455	0.67256	0.211069	0.0320838	0.163645	0.0843419	0	0	serine/threonine_kinase_38_like
ENSG00000143333	0.671829	-0.186963	0.102478	0.298388	0.153788	0	0	regulator_of_G-protein_signaling_16
ENSG00000256383	0.670882	0.0165124	0.0465105	0.198166	0.102134	0	0	no_fct
ENSG00000188313	0.670463	1.76554	0.00551929	0.072823	0.0375327	0	0	phospholipid_scramblase_1
ENSG00000114346	0.670368	0.369901	0.0168316	0.120307	0.0620059	0	0	epithelial_cell_transforming_sequence_2_oncogene
ENSG00000167034	0.669536	0.496345	0.0186945	0.126145	0.0650144	0	0	NK3_homeobox_1
ENSG00000152404	0.669526	0.0535891	0.0032685	0.0582496	0.0300216	0	0	CWF19-like_2,_cell_cycle_control_(S._pombe)
ENSG00000163565	0.669173	0.790151	0.00385369	0.0622943	0.0321062	0	0	interferon,_gamma-inducible_protein_16
ENSG00000151304	0.669094	0.324376	0.0058473	0.0742459	0.038266	0	0	serum_response_factor_binding_protein_1
ENSG00000132329	0.668663	0.350407	0.118249	0.322538	0.166235	0	0	receptor_(G_protein-coupled)_activity_modifying_protein_1
ENSG00000249669	0.668515	-0.16887	0.00221994	0.0486061	0.0250514	0	0	no_fct
ENSG00000228106	0.668346	-0.143978	0.0774297	0.258158	0.133053	0	0	no_fct
ENSG00000137842	0.667969	0.814289	0.00681716	0.0796509	0.0410517	0	0	transmembrane_protein_62
ENSG00000197329	0.66751	0.318583	0.00273009	0.0536699	0.0276612	0	0	pellino_homolog_1_(Drosophila)
ENSG00000164674	0.667493	0.355528	0.00021602	0.0218085	0.01124	0	0	synaptotagmin-like_3
ENSG00000135744	0.666936	-0.154935	0.18098	0.403554	0.20799	0	0	angiotensinogen_(serpin_peptidase_inhibitor,_clade_A,_member_8)
ENSG00000090339	0.665632	0.1096	0.00814201	0.0851277	0.0438745	0	0	intercellular_adhesion_molecule_1
ENSG00000169902	0.665522	0.112722	0.00159963	0.0443973	0.0228822	0	0	tyrosylprotein_sulfotransferase_1
ENSG00000144034	0.663877	0.228117	0.0064273	0.0774785	0.0399321	0	0	TP53RK_binding_protein
ENSG00000159259	0.663816	0.254216	0.00554465	0.072823	0.0375327	0	0	chromatin_assembly_factor_1,_subunit_B_(p60)
ENSG00000156802	0.663083	0.274057	0.00766108	0.0832713	0.0429177	0	0	ATPase_family,_AAA_domain_containing_2
ENSG00000174871	0.662737	-0.155145	0.187666	0.411102	0.21188	0	0	cornichon_homolog_2_(Drosophila)
ENSG00000115963	0.662411	0.073942	0.00174547	0.0456413	0.0235233	0	0	Rho_family_GTPase_3
ENSG00000248873	0.662106	0.086283	0.0707135	0.246451	0.12702	0	0	no_fct
ENSG00000253250	0.661222	0.384555	0.0300461	0.157796	0.0813273	0	0	no_fct
ENSG00000243444	0.661078	-0.0948193	0.00511937	0.070638	0.0364065	0	0	paralemmin_2
ENSG00000154928	0.659843	0.48955	0.0104733	0.0960352	0.0494962	0	0	EPH_receptor_B1
ENSG00000255893	0.659419	0.279357	0.0174045	0.121785	0.0627675	0	0	no_fct
ENSG00000232630	0.658744	-0.116432	0.121325	0.326628	0.168343	0	0	no_fct
ENSG00000138092	0.65868	0.277087	0.00329038	0.058297	0.030046	0	0	centromere_protein_O
ENSG00000132429	0.658533	0.101883	0.00159381	0.0443195	0.0228421	0	0	popeye_domain_containing_3
ENSG00000075131	0.65843	0.376293	0.010974	0.0983114	0.0506693	0	0	TIMELESS_interacting_protein
ENSG00000168404	0.658345	1.06012	0.0103567	0.0956954	0.049321	0	0	mixed_lineage_kinase_domain-like
ENSG00000227344	0.658327	0.368018	0.0402539	0.183893	0.0947775	0	0	no_fct
ENSG00000214424	0.658296	-0.0369027	0.205926	0.430096	0.22167	0	0	no_fct
ENSG00000139734	0.658248	0.269202	0.00928177	0.0901184	0.0464466	0	0	diaphanous_homolog_3_(Drosophila)
ENSG00000164211	0.658076	0.65913	0.00359458	0.060638	0.0312525	0	0	StAR-related_lipid_transfer_(START)_domain_containing_4
ENSG00000213683	0.656836	0.256927	0.0018032	0.0458935	0.0236533	0	0	no_fct
ENSG00000162894	0.656335	0.129611	0.117467	0.321418	0.165657	0	0	Fas_apoptotic_inhibitory_molecule_3
ENSG00000186806	0.656104	1.06433	0.0060438	0.0753002	0.0388094	0	0	V-set_and_immunoglobulin_domain_containing_10_like
ENSG00000100385	0.655571	-0.512261	0.106005	0.303491	0.156418	0	0	interleukin_2_receptor,_beta
ENSG00000173207	0.655112	0.58971	0.0263059	0.149405	0.0770027	0	0	CDC28_protein_kinase_regulatory_subunit_1B
ENSG00000110693	0.655085	-0.00709525	0.176654	0.399326	0.205811	0	0	SRY_(sex_determining_region_Y)-box_6
ENSG00000174799	0.65491	0.0593565	0.00310177	0.05675	0.0292487	0	0	centrosomal_protein_135kDa
ENSG00000119705	0.653941	0.0703003	0.00217759	0.0483872	0.0249385	0	0	SRA_stem-loop_interacting_RNA_binding_protein
ENSG00000156299	0.65338	0.281507	0.0824415	0.267226	0.137727	0	0	T-cell_lymphoma_invasion_and_metastasis_1
ENSG00000147536	0.652864	0.0862149	0.0167519	0.119992	0.0618435	0	0	GINS_complex_subunit_4_(Sld5_homolog)
ENSG00000106785	0.652778	1.36241	0.0131958	0.107243	0.0552728	0	0	tripartite_motif_containing_14
ENSG00000127586	0.652609	0.200644	0.0246918	0.144535	0.0744928	0	0	CTF18,_chromosome_transmission_fidelity_factor_18_homolog_(S._cerevisiae)
ENSG00000205364	0.652179	0.712954	0.0891153	0.277789	0.143171	0	0	metallothionein_1M
ENSG00000229933	0.652132	-0.785389	0.0359076	0.173408	0.0893737	0	0	no_fct
ENSG00000141664	0.65156	0.756926	0.010093	0.0942821	0.0485926	0	0	zinc_finger,_CCHC_domain_containing_2
ENSG00000159256	0.651514	0.141345	0.00495778	0.0696688	0.035907	0	0	MORC_family_CW-type_zinc_finger_3
ENSG00000237794	0.651403	0.221546	0.00640858	0.0774785	0.0399321	0	0	no_fct
ENSG00000206190	0.651013	0.826855	0.00406112	0.0637034	0.0328325	0	0	ATPase,_class_V,_type_10A
ENSG00000234883	0.649509	0.339129	0.0311302	0.160732	0.0828406	0	0	no_fct
ENSG00000036448	0.649351	0.174371	0.241546	0.467641	0.24102	0	0	myomesin_(M-protein)_2,_165kDa
ENSG00000231389	0.647915	0.183168	0.0237803	0.142257	0.0733184	0	0	major_histocompatibility_complex,_class_II,_DP_alpha_1
ENSG00000155158	0.647807	0.448037	0.011997	0.102292	0.0527206	0	0	tetratricopeptide_repeat_domain_39B
ENSG00000142867	0.647556	0.207921	0.0234616	0.141327	0.0728393	0	0	B-cell_CLL/lymphoma_10
ENSG00000166900	0.64754	0.240921	0.00127151	0.0399652	0.0205979	0	0	syntaxin_3
ENSG00000133302	0.646904	0.383927	0.00593187	0.0745793	0.0384379	0	0	ankyrin_repeat_domain_32
ENSG00000198865	0.646278	-0.036683	0.00237936	0.049646	0.0255873	0	0	coiled-coil_domain_containing_152
ENSG00000159055	0.646266	0.0401723	0.000952244	0.0351947	0.0181392	0	0	MIS18_kinetochore_protein_homolog_A_(S._pombe)
ENSG00000213684	0.64568	1.76261	0.410143	0.624296	0.32176	0	0	no_fct
ENSG00000228348	0.645381	0.28241	0.249175	0.4753	0.244968	0	0	no_fct
ENSG00000165244	0.644763	0.437644	0.0505986	0.20687	0.10662	0	0	zinc_finger_protein_367
ENSG00000247349	0.644221	0.016536	0.126953	0.334613	0.172458	0	0	no_fct
ENSG00000146232	0.643029	0.179745	0.00371188	0.0613503	0.0316197	0	0	nuclear_factor_of_kappa_light_polypeptide_gene_enhancer_in_B-cells_inhibitor,_epsilon
ENSG00000231409	0.64223	2.04559	0.49055	0.689068	0.355143	0	0	no_fct
ENSG00000140525	0.641946	0.384431	0.00283669	0.0544749	0.0280761	0	0	Fanconi_anemia,_complementation_group_I
ENSG00000231187	0.64194	-0.213926	0.118751	0.323366	0.166662	0	0	no_fct
ENSG00000152952	0.64119	0.233177	0.0168827	0.120382	0.0620444	0	0	procollagen-lysine,_2-oxoglutarate_5-dioxygenase_2
ENSG00000114315	0.64095	0.159217	0.0839759	0.26989	0.1391	0	0	hairy_and_enhancer_of_split_1,_(Drosophila)
ENSG00000104432	0.640943	0.330472	0.0139224	0.110122	0.0567566	0	0	interleukin_7
ENSG00000117632	0.640866	0.178905	0.00760248	0.0829618	0.0427582	0	0	stathmin_1
ENSG00000198959	0.640658	0.0394913	0.000848571	0.0341051	0.0175776	0	0	transglutaminase_2_(C_polypeptide,_protein-glutamine-gamma-glutamyltransferase)
ENSG00000004864	0.640226	0.470248	0.0058365	0.0742459	0.038266	0	0	solute_carrier_family_25,_member_13_(citrin)
ENSG00000240764	0.639334	0.0613929	0.0785125	0.260176	0.134093	0	0	protocadherin_gamma_subfamily_C,_5
ENSG00000183474	0.63928	-0.467171	0.00221909	0.0486061	0.0250514	0	0	general_transcription_factor_IIH,_polypeptide_2C
ENSG00000139372	0.639139	0.0794999	0.00783132	0.0837876	0.0431838	0	0	thymine-DNA_glycosylase
ENSG00000084710	0.638707	0.516366	0.114922	0.317988	0.163889	0	0	EFR3_homolog_B_(S._cerevisiae)
ENSG00000230453	0.638479	-0.315606	0.124044	0.3302	0.170183	0	0	ankyrin_repeat_domain_18B
ENSG00000110203	0.637757	0.287489	0.0610751	0.228009	0.117515	0	0	folate_receptor_3_(gamma)
ENSG00000138495	0.637516	0.0104642	0.0118596	0.101666	0.0523984	0	0	COX17_cytochrome_c_oxidase_assembly_homolog_(S._cerevisiae)
ENSG00000144158	0.63714	0.10833	0.00569138	0.0736325	0.0379499	0	0	no_fct
ENSG00000109472	0.636843	1.36738	0.315717	0.540305	0.278471	0	0	carboxypeptidase_E
ENSG00000170801	0.636706	0.0403952	0.0758928	0.255699	0.131786	0	0	HtrA_serine_peptidase_3
ENSG00000215158	0.636548	-0.083679	0.0042659	0.0655025	0.0337597	0	0	no_fct
ENSG00000228253	0.635844	0.102023	0.0847397	0.271101	0.139724	0	0	no_fct
ENSG00000105499	0.635608	-0.0930593	0.00706486	0.080517	0.0414981	0	0	phospholipase_A2,_group_IVC_(cytosolic,_calcium-independent)
ENSG00000164743	0.635518	0.00967352	0.0103429	0.0956281	0.0492863	0	0	chromosome_8_open_reading_frame_48
ENSG00000162062	0.635312	0.247917	0.0340336	0.168746	0.0869711	0	0	chromosome_16_open_reading_frame_59
ENSG00000101347	0.634949	1.71287	0.00896865	0.0888831	0.04581	0	0	SAM_domain_and_HD_domain_1
ENSG00000165105	0.63402	0.294209	0.0212696	0.134451	0.0692955	0	0	RAS_and_EF-hand_domain_containing
ENSG00000106484	0.633189	-0.370707	0.0254404	0.147072	0.0758002	0	0	mesoderm_specific_transcript_homolog_(mouse)
ENSG00000144597	0.632894	0.137513	0.000719136	0.0314688	0.0162189	0	0	ELL_associated_factor_1
ENSG00000214367	0.632538	0.093092	0.0108352	0.0980157	0.0505169	0	0	HAUS_augmin-like_complex,_subunit_3
ENSG00000117597	0.631906	0.161978	0.00161472	0.0444779	0.0229237	0	0	digestive_organ_expansion_factor_homolog_(zebrafish)
ENSG00000229358	0.631221	-0.183871	0.00696381	0.0801546	0.0413114	0	0	no_fct
ENSG00000006747	0.631213	0.132246	0.245557	0.47193	0.24323	0	0	scinderin
ENSG00000078018	0.631173	0.578292	0.0307478	0.159429	0.0821689	0	0	microtubule-associated_protein_2
ENSG00000161638	0.631047	0.263796	0.000294552	0.0235469	0.012136	0	0	integrin,_alpha_5_(fibronectin_receptor,_alpha_polypeptide)
ENSG00000067992	0.630457	0.255408	0.0988134	0.292935	0.150978	0	0	pyruvate_dehydrogenase_kinase,_isozyme_3
ENSG00000237161	0.630378	0.386547	0.148932	0.364207	0.187711	0	0	no_fct
ENSG00000000460	0.63006	0.151609	0.0216046	0.135582	0.0698782	0	0	chromosome_1_open_reading_frame_112
ENSG00000164087	0.629973	0.27409	0.00127189	0.0399652	0.0205979	0	0	POC1_centriolar_protein_homolog_A_(Chlamydomonas)
ENSG00000120526	0.629611	0.827414	0.0550758	0.216679	0.111676	0	0	NudC_domain_containing_1
ENSG00000091831	0.629513	-0.135903	0.0570899	0.221056	0.113931	0	0	estrogen_receptor_1
ENSG00000167670	0.628795	0.189493	0.00402064	0.0634899	0.0327224	0	0	chromatin_assembly_factor_1,_subunit_A_(p150)
ENSG00000198056	0.628511	-0.00151732	0.0335525	0.167689	0.0864263	0	0	primase,_DNA,_polypeptide_1_(49kDa)
ENSG00000167703	0.627732	0.314265	0.00524505	0.0710449	0.0366162	0	0	solute_carrier_family_43,_member_2
ENSG00000187608	0.62649	2.83189	0.129326	0.338833	0.174633	0	0	ISG15_ubiquitin-like_modifier
ENSG00000250067	0.626038	-0.224468	0.0335606	0.167689	0.0864263	0	0	YjeF_N-terminal_domain_containing_3
ENSG00000198331	0.625961	0.295138	0.0048481	0.0689039	0.0355128	0	0	hydrolethalus_syndrome_1
ENSG00000138376	0.625644	0.553359	0.0238915	0.142536	0.0734626	0	0	BRCA1_associated_RING_domain_1
ENSG00000229268	0.624187	0.808215	0.336351	0.557306	0.287233	0	0	no_fct
ENSG00000248590	0.624121	2.51983	0.430477	0.6415	0.330626	0	0	no_fct
ENSG00000134954	0.623832	0.109827	0.00291775	0.0551672	0.028433	0	0	v-ets_erythroblastosis_virus_E26_oncogene_homolog_1_(avian)
ENSG00000202335	0.623143	0.114467	0.0630865	0.23196	0.119551	0	0	no_fct
ENSG00000196839	0.623139	-0.0322893	0.000334582	0.0244139	0.0125828	0	0	adenosine_deaminase
ENSG00000174173	0.622573	0.165374	0.00973454	0.0925029	0.0476756	0	0	RNA_(guanine-9-)_methyltransferase_domain_containing_1
ENSG00000198805	0.622565	0.702973	0.000660389	0.030975	0.0159644	0	0	purine_nucleoside_phosphorylase
ENSG00000207650	0.622493	0.0265586	0.00173055	0.0456413	0.0235233	0	0	microRNA_570
ENSG00000169271	0.621677	0.0920705	0.0255815	0.147339	0.0759379	0	0	heat_shock_27kDa_protein_3
ENSG00000142856	0.620994	0.150889	0.00874011	0.0877834	0.0452432	0	0	integrin_beta_3_binding_protein_(beta3-endonexin)
ENSG00000127329	0.620791	0.266476	0.103357	0.299998	0.154617	0	0	protein_tyrosine_phosphatase,_receptor_type,_B
ENSG00000180035	0.620788	0.00386678	0.0191953	0.127808	0.0658716	0	0	zinc_finger_protein_48
ENSG00000198087	0.619798	0.194701	0.0104451	0.0960352	0.0494962	0	0	CD2-associated_protein
ENSG00000106462	0.619525	0.130475	0.0184407	0.125153	0.0645034	0	0	enhancer_of_zeste_homolog_2_(Drosophila)
ENSG00000141540	0.619235	-0.26701	0.0332559	0.167132	0.0861389	0	0	tweety_homolog_2_(Drosophila)
ENSG00000166922	0.61901	-0.203495	0.0125031	0.104146	0.0536763	0	0	secretogranin_V_(7B2_protein)
ENSG00000219553	0.618787	0.151856	0.212495	0.436294	0.224864	0	0	no_fct
ENSG00000166598	0.618699	0.161634	0.00672966	0.0791313	0.0407839	0	0	heat_shock_protein_90kDa_beta_(Grp94),_member_1
ENSG00000228196	0.618644	0.450073	0.0321561	0.163957	0.0845028	0	0	no_fct
ENSG00000239455	0.617976	0.596019	0.101297	0.296213	0.152667	0	0	no_fct
ENSG00000155858	0.617851	0.0443124	0.0112395	0.0993587	0.051209	0	0	LSM11,_U7_small_nuclear_RNA_associated
ENSG00000092529	0.617718	0.150829	0.0156519	0.116165	0.059871	0	0	calpain_3,_(p94)
ENSG00000156414	0.616773	0.333691	0.00230654	0.0493512	0.0254354	0	0	tudor_domain_containing_9
ENSG00000040275	0.615588	0.0825594	0.00134479	0.0411433	0.0212051	0	0	coiled-coil_domain_containing_99
ENSG00000139180	0.615318	0.513014	0.0010815	0.0376312	0.019395	0	0	NADH_dehydrogenase_(ubiquinone)_1_alpha_subcomplex,_9,_39kDa
ENSG00000102230	0.615102	0.414205	0.150831	0.366694	0.188993	0	0	phosphate_cytidylyltransferase_1,_choline,_beta
ENSG00000130589	0.61489	2.10613	0.0700258	0.244733	0.126134	0	0	Peroxisomal_proliferator-activated_receptor_A-interacting_complex_285_kDa_protein
ENSG00000214182	0.614636	0.160693	0.0060683	0.0754024	0.0388621	0	0	no_fct
ENSG00000142046	0.613818	-0.145442	0.0511534	0.20818	0.107295	0	0	transmembrane_protein_91
ENSG00000028839	0.613712	0.070615	0.00198901	0.0475579	0.0245111	0	0	TBP-like_1
ENSG00000139438	0.613412	0.349519	0.158166	0.376057	0.193818	0	0	chromosome_12_open_reading_frame_34
ENSG00000146859	0.613223	0.688767	0.0107457	0.0974531	0.0502269	0	0	transmembrane_protein_140
ENSG00000247240	0.612862	-0.146555	0.109061	0.308278	0.158885	0	0	no_fct
ENSG00000184220	0.612812	0.242055	0.00637612	0.0774507	0.0399177	0	0	chromosome_3_open_reading_frame_26
ENSG00000170540	0.612667	0.225349	0.0101589	0.0945803	0.0487463	0	0	ADP-ribosylation_factor-like_6_interacting_protein_1
ENSG00000185133	0.612397	-0.496301	0.0527074	0.211318	0.108912	0	0	inositol_polyphosphate-5-phosphatase_J
ENSG00000118263	0.610443	-0.0813992	0.0114024	0.100157	0.0516206	0	0	Kruppel-like_factor_7_(ubiquitous)
ENSG00000185621	0.60916	0.128885	0.00459165	0.0675728	0.0348267	0	0	leishmanolysin-like_(metallopeptidase_M8_family)
ENSG00000213694	0.609058	0.119911	0.00592897	0.0745793	0.0384379	0	0	sphingosine-1-phosphate_receptor_3
ENSG00000117069	0.608227	-0.143932	0.00484316	0.0689003	0.0355109	0	0	ST6_(alpha-N-acetyl-neuraminyl-2,3-beta-galactosyl-1,3)-N-acetylgalactosaminide_alpha-2,6-sialyltransferase_5
ENSG00000143033	0.607612	0.300657	0.0197784	0.129631	0.0668112	0	0	metal_response_element_binding_transcription_factor_2
ENSG00000174442	0.607136	0.285633	0.0115219	0.100369	0.0517299	0	0	Zwilch,_kinetochore_associated,_homolog_(Drosophila)
ENSG00000118655	0.60547	0.0775044	0.00516242	0.0709694	0.0365773	0	0	DNA_cross-link_repair_1B
ENSG00000185864	0.605309	-0.480304	0.13344	0.343947	0.177269	0	0	no_fct
ENSG00000171310	0.604736	0.520738	0.00633553	0.0770849	0.0397292	0	0	carbohydrate_(chondroitin_4)_sulfotransferase_11
ENSG00000124789	0.604443	0.14186	0.00457257	0.0675728	0.0348267	0	0	nucleoporin_153kDa
ENSG00000253251	0.604324	0.428014	0.085361	0.271854	0.140112	0	0	no_fct
ENSG00000153064	0.604116	0.205638	0.129389	0.338849	0.174641	0	0	B-cell_scaffold_protein_with_ankyrin_repeats_1
ENSG00000124688	0.6041	0.339533	0.00170655	0.0454298	0.0234143	0	0	MAD2L1_binding_protein
ENSG00000136960	0.602857	0.073098	0.0128361	0.10584	0.0545497	0	0	ectonucleotide_pyrophosphatase/phosphodiesterase_2
ENSG00000116701	0.602752	1.66005	0.255638	0.481923	0.248381	0	0	neutrophil_cytosolic_factor_2
ENSG00000167641	0.602512	-0.0264022	0.111993	0.312781	0.161206	0	0	protein_phosphatase_1,_regulatory_(inhibitor)_subunit_14A
ENSG00000170989	0.602309	-0.131285	0.00370516	0.0613427	0.0316158	0	0	sphingosine-1-phosphate_receptor_1
ENSG00000164647	0.602011	0.119186	0.0114505	0.100307	0.0516979	0	0	six_transmembrane_epithelial_antigen_of_the_prostate_1
ENSG00000104738	0.60151	0.157582	0.0159714	0.11706	0.0603322	0	0	minichromosome_maintenance_complex_component_4
ENSG00000143502	0.601106	0.721988	0.215416	0.439497	0.226515	0	0	sushi_domain_containing_4
ENSG00000177640	0.60095	0.216555	0.074419	0.25358	0.130694	0	0	cancer_susceptibility_candidate_2
ENSG00000136167	0.600722	0.228111	0.166213	0.38656	0.199232	0	0	lymphocyte_cytosolic_protein_1_(L-plastin)
ENSG00000130449	0.600603	-0.0400483	0.0063853	0.0774785	0.0399321	0	0	zinc_finger,_SWIM-type_containing_6
ENSG00000101868	0.599545	0.0359637	0.00816482	0.0851805	0.0439016	0	0	polymerase_(DNA_directed),_alpha_1,_catalytic_subunit
ENSG00000133328	0.599068	1.23017	0.430931	0.641599	0.330677	0	0	HRAS-like_suppressor_2
ENSG00000102098	0.598676	0.0622212	0.026785	0.150845	0.0777448	0	0	sex_comb_on_midleg-like_2_(Drosophila)
ENSG00000172840	0.598582	0.190093	0.000188821	0.0213251	0.0109909	0	0	pyruvate_dehyrogenase_phosphatase_catalytic_subunit_2
ENSG00000135541	0.598444	-0.0583804	0.0025013	0.0508909	0.026229	0	0	Abelson_helper_integration_site_1
ENSG00000166349	0.598366	-0.497951	0.118018	0.322319	0.166122	0	0	recombination_activating_gene_1
ENSG00000189001	0.598279	-0.191332	0.199542	0.422837	0.217928	0	0	suprabasin
ENSG00000128408	0.597878	-0.0703397	0.0753792	0.255326	0.131594	0	0	RIB43A_domain_with_coiled-coils_2
ENSG00000249548	0.59715	-0.352544	0.135858	0.347147	0.178918	0	0	no_fct
ENSG00000143473	0.596045	0.0920061	0.0441524	0.192789	0.0993628	0	0	potassium_voltage-gated_channel,_subfamily_H_(eag-related),_member_1
ENSG00000197358	0.595807	0.371433	0.0128676	0.106013	0.0546387	0	0	BCL2/adenovirus_E1B_19kDa_interacting_protein_3_pseudogene_1
ENSG00000256652	0.5954	-0.388249	0.0182187	0.12465	0.0642441	0	0	no_fct
ENSG00000117479	0.594451	0.215051	0.0364729	0.173968	0.0896623	0	0	solute_carrier_family_19_(thiamine_transporter),_member_2
ENSG00000101311	0.594391	0.163608	0.00625358	0.0767119	0.039537	0	0	fermitin_family_member_1
ENSG00000103966	0.59392	0.862674	0.0177042	0.12267	0.0632237	0	0	EH-domain_containing_4
ENSG00000170873	0.593593	0.378703	0.00462661	0.0676515	0.0348673	0	0	metastasis_suppressor_1
ENSG00000165895	0.593389	0.147277	0.00758427	0.0828245	0.0426874	0	0	Rho_GTPase_activating_protein_42
ENSG00000196247	0.593276	0.626361	0.0824923	0.267261	0.137745	0	0	zinc_finger_protein_107
ENSG00000166562	0.59307	0.0315909	0.0059739	0.0747246	0.0385127	0	0	SEC11_homolog_C_(S._cerevisiae)
ENSG00000008086	0.59294	0.429353	0.00789997	0.0842091	0.043401	0	0	cyclin-dependent_kinase-like_5
ENSG00000118939	0.592197	0.237455	0.000768217	0.0324078	0.0167028	0	0	ubiquitin_carboxyl-terminal_esterase_L3_(ubiquitin_thiolesterase)
ENSG00000135838	0.590086	-0.119121	0.0128908	0.106053	0.0546595	0	0	N-acetylneuraminate_pyruvate_lyase_(dihydrodipicolinate_synthase)
ENSG00000240529	0.589982	-0.181909	0.00523966	0.0710372	0.0366123	0	0	no_fct
ENSG00000229417	0.589961	1.86537	0.46396	0.668776	0.344684	0	0	no_fct
ENSG00000162174	0.58972	-0.00575761	0.270532	0.497378	0.256346	0	0	asparaginase_like_1
ENSG00000131018	0.589343	0.0771835	0.000561791	0.0290984	0.0149972	0	0	spectrin_repeat_containing,_nuclear_envelope_1
ENSG00000125871	0.589124	0.231125	0.00459254	0.0675728	0.0348267	0	0	chromosome_20_open_reading_frame_72
ENSG00000173432	0.588684	-0.425301	0.451056	0.657846	0.339051	0	0	serum_amyloid_A1
ENSG00000253223	0.588673	0.303973	0.274163	0.500924	0.258174	0	0	no_fct
ENSG00000215251	0.588595	0.168899	0.00521075	0.0709838	0.0365847	0	0	FAST_kinase_domains_5
ENSG00000166710	0.587944	0.715733	0.0861795	0.27293	0.140667	0	0	beta-2-microglobulin
ENSG00000171522	0.586208	0.869157	0.0133354	0.107842	0.0555811	0	0	prostaglandin_E_receptor_4_(subtype_EP4)
ENSG00000105835	0.586105	0.502619	0.0181007	0.124131	0.0639765	0	0	nicotinamide_phosphoribosyltransferase
ENSG00000135048	0.586025	0.0208405	0.000713115	0.0314364	0.0162022	0	0	transmembrane_protein_2
ENSG00000168556	0.585639	0.244538	0.00603661	0.0753002	0.0388094	0	0	inhibitor_of_growth_family,_member_2
ENSG00000124212	0.585567	-0.240391	0.0162914	0.118253	0.0609472	0	0	prostaglandin_I2_(prostacyclin)_synthase
ENSG00000154642	0.585458	0.548502	0.0963974	0.28933	0.149119	0	0	chromosome_21_open_reading_frame_91
ENSG00000152422	0.585456	0.400277	0.00887072	0.0881678	0.0454413	0	0	X-ray_repair_complementing_defective_repair_in_Chinese_hamster_cells_4
ENSG00000198554	0.585256	0.106342	0.0143182	0.111499	0.0574659	0	0	WD_repeat_and_HMG-box_DNA_binding_protein_1
ENSG00000141524	0.585229	0.727446	0.121305	0.326628	0.168343	0	0	transmembrane_channel-like_6
ENSG00000090975	0.58477	0.0910494	0.00232318	0.0493995	0.0254603	0	0	phosphatidylinositol_transfer_protein,_membrane-associated_2
ENSG00000164849	0.583905	0.653967	0.281729	0.50832	0.261986	0	0	G_protein-coupled_receptor_146
ENSG00000234764	0.583818	0.00178808	0.223712	0.4484	0.231103	0	0	no_fct
ENSG00000142871	0.583385	0.15131	0.0135017	0.108801	0.0560755	0	0	cysteine-rich,_angiogenic_inducer,_61
ENSG00000166889	0.583358	0.556236	0.000200437	0.021551	0.0111073	0	0	protein_associated_with_topoisomerase_II_homolog_1_(yeast)
ENSG00000248603	0.583289	-0.0372653	0.021492	0.135279	0.0697222	0	0	no_fct
ENSG00000152256	0.582802	0.501098	0.0259418	0.148369	0.0764686	0	0	pyruvate_dehydrogenase_kinase,_isozyme_1
ENSG00000100911	0.582187	0.462736	0.0134132	0.108233	0.0557827	0	0	proteasome_(prosome,_macropain)_activator_subunit_2_(PA28_beta)
ENSG00000086061	0.581953	0.478407	0.00233733	0.0493995	0.0254603	0	0	DnaJ_(Hsp40)_homolog,_subfamily_A,_member_1
ENSG00000169994	0.58179	-0.11926	0.0199787	0.129976	0.0669892	0	0	myosin_VIIB
ENSG00000145934	0.581346	-0.32052	0.0155151	0.115759	0.0596619	0	0	odz,_odd_Oz/ten-m_homolog_2_(Drosophila)
ENSG00000253161	0.581214	-0.0438908	0.20607	0.430154	0.221699	0	0	no_fct
ENSG00000100749	0.581164	0.250373	0.0245418	0.143943	0.0741877	0	0	vaccinia_related_kinase_1
ENSG00000102981	0.580049	-0.0570811	0.0235835	0.141739	0.0730518	0	0	par-6_partitioning_defective_6_homolog_alpha_(C._elegans)
ENSG00000023902	0.579487	0.115608	0.0145561	0.112528	0.0579963	0	0	pleckstrin_homology_domain_containing,_family_O_member_1
ENSG00000196233	0.579342	0.0401602	0.0113227	0.0998541	0.0514644	0	0	ligand_dependent_nuclear_receptor_corepressor
ENSG00000101412	0.579267	0.544012	0.0185517	0.125469	0.0646663	0	0	E2F_transcription_factor_1
ENSG00000173821	0.579193	0.932742	0.0106467	0.096925	0.0499547	0	0	ring_finger_protein_213
ENSG00000256238	0.578862	0.56223	0.0926628	0.283559	0.146145	0	0	no_fct
ENSG00000127337	0.578497	0.154764	0.030466	0.15871	0.0817985	0	0	YEATS_domain_containing_4
ENSG00000251495	0.578495	1.37304	0.554715	0.737981	0.380352	0	0	no_fct
ENSG00000225471	0.576729	0.342568	0.250013	0.476138	0.2454	0	0	no_fct
ENSG00000166130	0.576714	0.144762	0.00574954	0.0739298	0.0381031	0	0	IKBKB_interacting_protein
ENSG00000177803	0.576626	0.171473	0.489857	0.688627	0.354915	0	0	no_fct
ENSG00000188312	0.576482	0.0703991	0.0353437	0.172004	0.0886499	0	0	centromere_protein_P
ENSG00000216775	0.576352	-0.190193	0.041271	0.186548	0.0961459	0	0	no_fct
ENSG00000109911	0.576057	-0.00334786	0.00124397	0.0399549	0.0205926	0	0	elongation_protein_4_homolog_(S._cerevisiae)
ENSG00000256735	0.575406	0.0142041	0.0148973	0.113938	0.0587234	0	0	no_fct
ENSG00000160298	0.575217	-0.13022	0.0122276	0.103253	0.0532163	0	0	chromosome_21_open_reading_frame_58
ENSG00000143469	0.575007	0.151966	0.0365608	0.174281	0.0898235	0	0	synaptotagmin_XIV
ENSG00000222032	0.574543	0.40702	0.0106633	0.0970054	0.0499962	0	0	no_fct
ENSG00000236841	0.574109	-0.0966128	0.152314	0.36851	0.189928	0	0	no_fct
ENSG00000185052	0.574074	-0.0454695	0.00195401	0.0472754	0.0243655	0	0	solute_carrier_family_24_(sodium/potassium/calcium_exchanger),_member_3
ENSG00000162642	0.574029	0.104621	0.00825551	0.0854633	0.0440474	0	0	chromosome_1_open_reading_frame_52
ENSG00000103642	0.573757	0.0882539	0.00825583	0.0854633	0.0440474	0	0	lactamase,_beta
ENSG00000228221	0.573015	-0.382615	0.0907154	0.280594	0.144617	0	0	no_fct
ENSG00000171823	0.572892	0.273276	0.0027426	0.0537915	0.0277239	0	0	F-box_and_leucine-rich_repeat_protein_14
ENSG00000224713	0.57286	-0.0285508	0.0536944	0.213587	0.110082	0	0	no_fct
ENSG00000165501	0.572463	0.204881	0.0650305	0.235326	0.121286	0	0	leucine_rich_repeat_protein_1
ENSG00000097046	0.571782	0.270671	0.0312079	0.160851	0.0829017	0	0	cell_division_cycle_7_homolog_(S._cerevisiae)
ENSG00000175984	0.571612	-0.0481782	0.0594546	0.225174	0.116054	0	0	DENN/MADD_domain_containing_2C
ENSG00000099901	0.571588	0.139387	0.0140334	0.110273	0.0568341	0	0	RAN_binding_protein_1
ENSG00000154429	0.571406	0.447406	0.058251	0.222993	0.11493	0	0	chromosome_1_open_reading_frame_96
ENSG00000188522	0.571263	0.121645	0.00421372	0.0651775	0.0335922	0	0	family_with_sequence_similarity_83,_member_G
ENSG00000165923	0.571184	0.24597	0.0478747	0.201441	0.103822	0	0	ATP/GTP_binding_protein-like_2
ENSG00000167550	0.570324	1.13113	0.099935	0.29448	0.151774	0	0	Ras_homolog_enriched_in_brain_like_1
ENSG00000173083	0.569873	0.485559	0.0144126	0.112055	0.0577529	0	0	heparanase
ENSG00000137507	0.569681	0.151622	0.0130907	0.106979	0.0551367	0	0	leucine_rich_repeat_containing_32
ENSG00000119686	0.56968	0.0164335	0.0893866	0.278329	0.14345	0	0	Feline_leukemia_virus_subgroup_C_receptor-related_protein_2
ENSG00000205940	0.569395	2.38138	0.554198	0.737599	0.380156	0	0	heat_shock_protein_90kDa_alpha_(cytosolic),_class_B_member_2,_pseudogene
ENSG00000169379	0.569154	0.00832948	0.0054834	0.0727329	0.0374862	0	0	ADP-ribosylation_factor-like_13B
ENSG00000198300	0.568925	0.551275	0.15964	0.377724	0.194677	0	0	zinc_finger,_imprinted_2
ENSG00000162511	0.568634	0.205253	0.19283	0.415548	0.214172	0	0	lysosomal_protein_transmembrane_5
ENSG00000142178	0.568379	0.172414	0.135282	0.346245	0.178453	0	0	salt-inducible_kinase_1
ENSG00000111788	0.568062	-0.169647	0.246301	0.472749	0.243653	0	0	no_fct
ENSG00000101680	0.567788	0.608453	0.00429158	0.0656911	0.0338569	0	0	laminin,_alpha_1
ENSG00000133216	0.567565	0.183367	0.0121085	0.102716	0.0529392	0	0	EPH_receptor_B2
ENSG00000137198	0.567331	1.61765	0.0958952	0.288936	0.148916	0	0	guanosine_monophosphate_reductase
ENSG00000244165	0.567204	0.207058	0.0142994	0.11147	0.0574512	0	0	purinergic_receptor_P2Y,_G-protein_coupled,_11
ENSG00000234036	0.56688	1.89168	0.439543	0.648031	0.333992	0	0	no_fct
ENSG00000112658	0.566401	0.0919101	0.000433057	0.0264344	0.0136242	0	0	serum_response_factor_(c-fos_serum_response_element-binding_transcription_factor)
ENSG00000072133	0.566118	-0.00318038	0.00617787	0.0761109	0.0392272	0	0	ribosomal_protein_S6_kinase,_90kDa,_polypeptide_6
ENSG00000179029	0.565904	-0.0234411	0.0260323	0.148712	0.0766458	0	0	transmembrane_protein_107
ENSG00000140743	0.565692	0.246101	0.00399637	0.0634113	0.0326819	0	0	cerebellar_degeneration-related_protein_2,_62kDa
ENSG00000171208	0.565329	0.309688	0.0184361	0.125153	0.0645034	0	0	neuropilin_(NRP)_and_tolloid_(TLL)-like_2
ENSG00000241293	0.565285	0.40434	0.221227	0.444874	0.229286	0	0	no_fct
ENSG00000125319	0.564804	0.46602	0.00412881	0.0643905	0.0331866	0	0	chromosome_17_open_reading_frame_53
ENSG00000207870	0.562782	0.0626206	0.119553	0.324697	0.167348	0	0	microRNA_221
ENSG00000111669	0.562446	0.180188	0.00958462	0.0920299	0.0474318	0	0	triosephosphate_isomerase_1
ENSG00000131470	0.562211	0.350574	0.0524554	0.210537	0.10851	0	0	PSMC3_interacting_protein
ENSG00000131873	0.561868	0.25078	0.00831937	0.085819	0.0442308	0	0	chondroitin_sulfate_synthase_1
ENSG00000247137	0.561686	-0.0634284	0.0269541	0.151141	0.0778976	0	0	no_fct
ENSG00000023839	0.561626	0.0901382	0.0782178	0.259665	0.13383	0	0	ATP-binding_cassette,_sub-family_C_(CFTR/MRP),_member_2
ENSG00000225536	0.561586	0.763158	0.247728	0.474024	0.24431	0	0	no_fct
ENSG00000178127	0.561498	0.149154	0.0158423	0.116812	0.0602044	0	0	NADH_dehydrogenase_(ubiquinone)_flavoprotein_2,_24kDa
ENSG00000006634	0.561487	0.28477	0.00654252	0.0781808	0.040294	0	0	DBF4_homolog_(S._cerevisiae)
ENSG00000196966	0.561371	-0.160898	0.0341815	0.168913	0.087057	0	0	histone_cluster_1,_H3e
ENSG00000112379	0.561308	0.551644	0.0451095	0.194993	0.100499	0	0	KIAA1244
ENSG00000104064	0.561278	0.161614	0.00216815	0.0483287	0.0249084	0	0	GA_binding_protein_transcription_factor,_beta_subunit_1
ENSG00000176208	0.560914	0.285884	0.036658	0.174511	0.0899422	0	0	ATPase_family,_AAA_domain_containing_5
ENSG00000169258	0.560841	0.492473	0.0170298	0.120727	0.0622222	0	0	G_protein_regulated_inducer_of_neurite_outgrowth_1
ENSG00000170561	0.560761	0.107682	0.00255847	0.0514141	0.0264986	0	0	iroquois_homeobox_2
ENSG00000137267	0.560674	0.342642	0.00537022	0.0718381	0.037025	0	0	no_fct
ENSG00000102878	0.56054	0.0199343	0.0386643	0.179621	0.092576	0	0	heat_shock_transcription_factor_4
ENSG00000196696	0.559705	-0.0851125	0.101329	0.296213	0.152667	0	0	no_fct
ENSG00000088538	0.559321	0.413891	0.0221105	0.137367	0.0707985	0	0	dedicator_of_cytokinesis_3
ENSG00000135899	0.558878	1.42384	0.0544415	0.215331	0.110981	0	0	SP110_nuclear_body_protein
ENSG00000136824	0.5588	0.0796442	0.00955134	0.0920106	0.0474219	0	0	structural_maintenance_of_chromosomes_2
ENSG00000100567	0.557996	0.365266	0.0111378	0.098935	0.0509907	0	0	proteasome_(prosome,_macropain)_subunit,_alpha_type,_3
ENSG00000251667	0.557935	0.202843	0.178226	0.401001	0.206674	0	0	no_fct
ENSG00000231924	0.557314	-0.869012	0.00286512	0.054735	0.0282102	0	0	pregnancy_specific_beta-1-glycoprotein_1
ENSG00000169018	0.557139	-0.00185438	0.00995551	0.0938068	0.0483476	0	0	fem-1_homolog_b_(C._elegans)
ENSG00000170779	0.55595	0.288263	0.0110551	0.0986325	0.0508348	0	0	cell_division_cycle_associated_4
ENSG00000196312	0.555786	0.10923	0.188577	0.411928	0.212306	0	0	hippocampus_abundant_transcript-like_2
ENSG00000172331	0.555498	0.0381837	0.000917808	0.0345838	0.0178244	0	0	2,3-bisphosphoglycerate_mutase
ENSG00000161692	0.55474	0.487599	0.00296204	0.0556131	0.0286627	0	0	DBF4_homolog_B_(S._cerevisiae)
ENSG00000232615	0.554709	0.194137	0.177225	0.399964	0.20614	0	0	no_fct
ENSG00000119782	0.55436	0.406322	0.0223075	0.138224	0.07124	0	0	FK506_binding_protein_1B,_12.6_kDa
ENSG00000241343	0.553756	-0.0341185	0.0333415	0.167219	0.0861839	0	0	ribosomal_protein_L36a
ENSG00000232995	0.553685	-0.106818	0.022816	0.139727	0.0720146	0	0	no_fct
ENSG00000164542	0.55351	-0.363325	0.0142992	0.11147	0.0574512	0	0	KIAA0895
ENSG00000166923	0.551991	-0.0203965	0.00402266	0.0634899	0.0327224	0	0	gremlin_1
ENSG00000156876	0.551853	0.036273	0.0632542	0.232192	0.119671	0	0	spindle_assembly_6_homolog_(C._elegans)
ENSG00000213443	0.551263	0.787151	0.0504118	0.20662	0.106491	0	0	no_fct
ENSG00000143751	0.551233	0.216357	0.0016115	0.0444779	0.0229237	0	0	chromosome_1_open_reading_frame_55
ENSG00000005175	0.551004	0.123293	0.0326122	0.16539	0.0852415	0	0	RNA_polymerase_II_associated_protein_3
ENSG00000131944	0.550997	0.325242	0.00571189	0.0736995	0.0379844	0	0	chromosome_19_open_reading_frame_40
ENSG00000233155	0.549986	1.04118	0.386025	0.603032	0.3108	0	0	no_fct
ENSG00000224997	0.549558	-0.00401592	0.0802127	0.263311	0.135709	0	0	Uncharacterized_proteincDNA_FLJ53535
ENSG00000236792	0.549312	0.186748	0.122417	0.32791	0.169003	0	0	no_fct
ENSG00000104356	0.549199	0.0203554	0.00432428	0.0659857	0.0340087	0	0	processing_of_precursor_1,_ribonuclease_P/MRP_subunit_(S._cerevisiae)
ENSG00000255898	0.548734	0.412429	0.223252	0.447721	0.230754	0	0	no_fct
ENSG00000108679	0.548053	0.764418	0.0146583	0.11307	0.0582755	0	0	lectin,_galactoside-binding,_soluble,_3_binding_protein
ENSG00000153165	0.547541	-0.853622	0.24852	0.47477	0.244695	0	0	no_fct
ENSG00000102393	0.54741	0.471761	0.000667065	0.0310767	0.0160168	0	0	galactosidase,_alpha
ENSG00000144285	0.547399	-0.883506	0.326807	0.549654	0.283289	0	0	sodium_channel,_voltage-gated,_type_I,_alpha_subunit
ENSG00000048405	0.546715	0.0639066	0.0229789	0.140315	0.072318	0	0	zinc_finger_protein_800
ENSG00000164251	0.546711	0.140637	0.141821	0.354495	0.182705	0	0	coagulation_factor_II_(thrombin)_receptor-like_1
ENSG00000128708	0.546634	0.224628	0.0125131	0.104169	0.0536885	0	0	histone_acetyltransferase_1
ENSG00000100644	0.546266	-0.0189785	0.0047535	0.0684717	0.03529	0	0	hypoxia_inducible_factor_1,_alpha_subunit_(basic_helix-loop-helix_transcription_factor)
ENSG00000196074	0.545253	-0.178797	0.266584	0.493017	0.254099	0	0	synaptonemal_complex_protein_2
ENSG00000167325	0.545051	0.0786242	0.021967	0.137042	0.070631	0	0	ribonucleotide_reductase_M1
ENSG00000183831	0.544649	1.10803	0.486432	0.686103	0.353614	0	0	ankyrin_repeat_domain_45
ENSG00000119699	0.544613	0.364815	0.0184209	0.125153	0.0645034	0	0	transforming_growth_factor,_beta_3
ENSG00000117676	0.544432	0.14899	0.0522332	0.210107	0.108288	0	0	ribosomal_protein_S6_kinase,_90kDa,_polypeptide_1
ENSG00000135338	0.543964	-0.286854	0.0103246	0.0955785	0.0492607	0	0	Leber_congenital_amaurosis_5
ENSG00000042062	0.542785	0.305347	0.0394756	0.181578	0.0935845	0	0	family_with_sequence_similarity_65,_member_C
ENSG00000159231	0.542726	0.536152	0.0274549	0.152143	0.0784138	0	0	carbonyl_reductase_3
ENSG00000242457	0.542723	0.289452	0.139708	0.352282	0.181565	0	0	no_fct
ENSG00000197646	0.542391	0.585141	0.0374993	0.17663	0.0910343	0	0	programmed_cell_death_1_ligand_2
ENSG00000066697	0.541988	0.181449	0.00707909	0.080517	0.0414981	0	0	chromosome_9_open_reading_frame_30
ENSG00000174501	0.541887	-0.0374563	0.082451	0.267226	0.137727	0	0	Ankyrin_repeat_domain-containing_protein_36C
ENSG00000213416	0.540994	-0.318362	0.380598	0.598086	0.308251	0	0	keratin_associated_protein_4-12
ENSG00000073111	0.539938	0.189542	0.0255656	0.147305	0.0759205	0	0	minichromosome_maintenance_complex_component_2
ENSG00000103489	0.539785	0.174006	0.00119	0.0390735	0.0201383	0	0	xylosyltransferase_I
ENSG00000137573	0.539674	-0.32099	0.00365212	0.0609101	0.0313928	0	0	sulfatase_1
ENSG00000237828	0.539383	0.347	0.164956	0.384854	0.198352	0	0	no_fct
ENSG00000144959	0.53896	0.28592	0.0158293	0.116812	0.0602044	0	0	neutral_cholesterol_ester_hydrolase_1
ENSG00000180211	0.53895	1.01024	0.306378	0.531904	0.274141	0	0	no_fct
ENSG00000132510	0.538934	-0.162461	0.0273025	0.152102	0.0783928	0	0	lysine_(K)-specific_demethylase_6B
ENSG00000136122	0.537906	0.367977	0.0120718	0.102645	0.0529029	0	0	bora,_aurora_kinase_A_activator
ENSG00000120694	0.537471	0.336276	0.00350115	0.0600255	0.0309369	0	0	heat_shock_105kDa/110kDa_protein_1
ENSG00000174136	0.537066	0.254834	0.00016201	0.0205445	0.0105886	0	0	RGM_domain_family,_member_B
ENSG00000173334	0.536997	0.256848	0.0243381	0.143467	0.0739423	0	0	tribbles_homolog_1_(Drosophila)
ENSG00000106346	0.536997	0.37316	0.00454381	0.0674464	0.0347616	0	0	ubiquitin_specific_peptidase_42
ENSG00000213430	0.536836	0.465158	0.0522345	0.210107	0.108288	0	0	heat_shock_60kDa_protein_1_(chaperonin)_pseudogene_1
ENSG00000118513	0.536534	0.121997	0.359528	0.579706	0.298778	0	0	v-myb_myeloblastosis_viral_oncogene_homolog_(avian)
ENSG00000038427	0.536361	0.310384	0.0902786	0.279696	0.144154	0	0	versican
ENSG00000196381	0.535517	0.0460024	0.268034	0.494554	0.254891	0	0	zinc_finger_protein_781
ENSG00000137947	0.535275	0.347778	0.0194446	0.128784	0.0663749	0	0	general_transcription_factor_IIB
ENSG00000137628	0.535191	1.42176	0.0701997	0.245282	0.126417	0	0	DEAD_(Asp-Glu-Ala-Asp)_box_polypeptide_60
ENSG00000077514	0.535138	0.208778	0.00766481	0.0832713	0.0429177	0	0	polymerase_(DNA-directed),_delta_3,_accessory_subunit
ENSG00000119787	0.534966	0.142891	0.0203801	0.131372	0.0677086	0	0	atlastin_GTPase_2
ENSG00000164604	0.534449	0.274737	0.0450751	0.194961	0.100482	0	0	G_protein-coupled_receptor_85
ENSG00000168743	0.534365	2.87257	0.631703	0.791242	0.407803	0	0	nephronectin
ENSG00000184831	0.533861	0.457223	0.0282129	0.153993	0.0793675	0	0	apolipoprotein_O
ENSG00000205002	0.533729	-0.435307	0.111039	0.310956	0.160265	0	0	chromosome_8_open_reading_frame_85
ENSG00000174599	0.53362	0.0722431	0.193924	0.41644	0.214631	0	0	translocation_associated_membrane_protein_1-like_1
ENSG00000101040	0.533184	0.0507864	0.000593235	0.0298674	0.0153935	0	0	zinc_finger,_MYND-type_containing_8
ENSG00000176678	0.533037	0.148726	0.0232713	0.140931	0.0726352	0	0	forkhead_box_L1
ENSG00000235916	0.533008	0.483536	0.196738	0.419726	0.216325	0	0	no_fct
ENSG00000169155	0.5328	0.191786	0.00213528	0.0482487	0.0248672	0	0	zinc_finger_and_BTB_domain_containing_43
ENSG00000162772	0.532242	0.985097	0.171698	0.393041	0.202571	0	0	activating_transcription_factor_3
ENSG00000176102	0.531971	0.170395	0.0303359	0.15841	0.0816438	0	0	cleavage_stimulation_factor,_3'_pre-RNA,_subunit_3,_77kDa
ENSG00000124802	0.53155	0.149264	0.0169242	0.120525	0.0621181	0	0	eukaryotic_translation_elongation_factor_1_epsilon_1
ENSG00000149054	0.531419	0.00160132	0.0240677	0.142943	0.073672	0	0	zinc_finger_protein_215
ENSG00000176890	0.531379	0.31886	0.0272652	0.152102	0.0783928	0	0	thymidylate_synthetase
ENSG00000107443	0.531158	0.420411	0.0442802	0.192865	0.0994017	0	0	cyclin_J
ENSG00000143013	0.531032	0.115479	0.00364719	0.0609101	0.0313928	0	0	LIM_domain_only_4
ENSG00000011201	0.529957	0.348211	0.00496137	0.0696688	0.035907	0	0	Kallmann_syndrome_1_sequence
ENSG00000146757	0.529162	0.215134	0.0902148	0.279586	0.144097	0	0	zinc_finger_protein_92
ENSG00000120688	0.528677	0.100224	0.0110568	0.0986325	0.0508348	0	0	WW_domain_binding_protein_4_(formin_binding_protein_21)
ENSG00000105821	0.528609	0.00574697	0.00184078	0.0459563	0.0236857	0	0	DnaJ_(Hsp40)_homolog,_subfamily_C,_member_2
ENSG00000124207	0.527337	0.151982	0.0230176	0.140318	0.0723194	0	0	CSE1_chromosome_segregation_1-like_(yeast)
ENSG00000067066	0.526372	0.834458	0.00754175	0.0828245	0.0426874	0	0	SP100_nuclear_antigen
ENSG00000215154	0.526229	0.298679	0.0113871	0.100157	0.0516206	0	0	no_fct
ENSG00000138050	0.526198	0.0811672	0.0165054	0.118785	0.0612214	0	0	THUMP_domain_containing_2
ENSG00000249348	0.525963	-0.247971	0.0398523	0.182682	0.0941537	0	0	no_fct
ENSG00000124383	0.525831	0.0743785	0.00726531	0.0815822	0.0420471	0	0	M-phase_phosphoprotein_10_(U3_small_nucleolar_ribonucleoprotein)
ENSG00000169330	0.52554	0.184134	0.0154359	0.115612	0.059586	0	0	KIAA1024
ENSG00000234745	0.525502	0.750112	0.0259187	0.148369	0.0764686	0	0	major_histocompatibility_complex,_class_I,_B
ENSG00000142611	0.525213	0.628015	0.245838	0.47216	0.243349	0	0	PR_domain_containing_16
ENSG00000235354	0.525083	1.00146	0.485426	0.685389	0.353246	0	0	no_fct
ENSG00000183570	0.524302	-0.0536536	0.137275	0.349005	0.179876	0	0	poly(rC)_binding_protein_3
ENSG00000151967	0.524106	0.226671	0.0652232	0.235675	0.121466	0	0	schwannomin_interacting_protein_1
ENSG00000017483	0.523964	0.634166	0.0137612	0.109801	0.0565908	0	0	solute_carrier_family_38,_member_5
ENSG00000076706	0.523578	0.0833767	0.00581644	0.0740879	0.0381846	0	0	melanoma_cell_adhesion_molecule
ENSG00000204248	0.523542	-0.403904	0.17633	0.399146	0.205718	0	0	collagen,_type_XI,_alpha_2
ENSG00000104381	0.523469	-0.0957917	0.00974748	0.0925067	0.0476776	0	0	ganglioside-induced_differentiation-associated_protein_1
ENSG00000066557	0.523335	0.0746778	0.0251424	0.145723	0.0751049	0	0	leucine_rich_repeat_containing_40
ENSG00000007933	0.522992	-0.643519	0.0978155	0.291797	0.150391	0	0	flavin_containing_monooxygenase_3
ENSG00000152749	0.52243	0.732795	0.0617412	0.229169	0.118113	0	0	G_protein-coupled_receptor_180
ENSG00000111052	0.522424	-0.248364	0.0163146	0.118253	0.0609472	0	0	lin-7_homolog_A_(C._elegans)
ENSG00000202532	0.52226	-0.325859	0.0679173	0.240973	0.124197	0	0	no_fct
ENSG00000213402	0.52186	-0.104173	0.177795	0.400687	0.206512	0	0	protein_tyrosine_phosphatase,_receptor_type,_C-associated_protein
ENSG00000123136	0.52161	0.416059	0.0172791	0.121471	0.0626057	0	0	DEAD_(Asp-Glu-Ala-Asp)_box_polypeptide_39A
ENSG00000101670	0.520576	1.41739	0.328844	0.551007	0.283987	0	0	lipase,_endothelial
ENSG00000127080	0.52057	0.1514	0.00125728	0.0399549	0.0205926	0	0	inositol_1,3,4,5,6-pentakisphosphate_2-kinase
ENSG00000170542	0.519658	0.108027	0.00324653	0.0582496	0.0300216	0	0	serpin_peptidase_inhibitor,_clade_B_(ovalbumin),_member_9
ENSG00000185839	0.519499	0.331479	0.00732455	0.0818103	0.0421647	0	0	no_fct
ENSG00000122417	0.519399	0.0587253	0.0161843	0.11789	0.0607599	0	0	outer_dense_fiber_of_sperm_tails_2-like
ENSG00000144802	0.519276	0.24729	0.211239	0.43523	0.224315	0	0	nuclear_factor_of_kappa_light_polypeptide_gene_enhancer_in_B-cells_inhibitor,_zeta
ENSG00000198814	0.519086	0.0121528	0.0291885	0.156075	0.0804404	0	0	glycerol_kinase
ENSG00000123999	0.519075	-0.300225	0.00352039	0.0601035	0.0309771	0	0	inhibin,_alpha
ENSG00000109534	0.519044	0.256573	0.0128875	0.106053	0.0546595	0	0	GAR1_ribonucleoprotein_homolog_(yeast)
ENSG00000189134	0.518409	-0.139738	0.0638733	0.233377	0.120282	0	0	NFKB_activating_protein-like
ENSG00000135905	0.517893	0.049406	0.00741435	0.0819858	0.0422551	0	0	dedicator_of_cytokinesis_10
ENSG00000129534	0.517449	0.212319	0.0168566	0.120369	0.0620377	0	0	MIS18_binding_protein_1
ENSG00000137808	0.517328	-0.0265603	0.0242349	0.143459	0.0739381	0	0	no_fct
ENSG00000228519	0.51728	0.141352	0.0674547	0.240082	0.123737	0	0	no_fct
ENSG00000126804	0.51717	-0.0717943	0.0234085	0.141255	0.072802	0	0	zinc_finger_and_BTB_domain_containing_1
ENSG00000242902	0.517054	-0.106009	0.189006	0.412015	0.212351	0	0	no_fct
ENSG00000132357	0.517008	0.267523	0.00291404	0.0551672	0.028433	0	0	caspase_recruitment_domain_family,_member_6
ENSG00000111231	0.516891	0.204842	0.00820971	0.085358	0.0439931	0	0	GPN-loop_GTPase_3
ENSG00000224543	0.516527	0.487613	0.0767256	0.257209	0.132565	0	0	small_nuclear_ribonucleoprotein_G-like_protein_
ENSG00000131174	0.516066	0.13594	0.00972897	0.0925029	0.0476756	0	0	cytochrome_c_oxidase_subunit_VIIb
ENSG00000251136	0.515804	0.120621	0.0258862	0.148281	0.0764235	0	0	no_fct
ENSG00000226784	0.515639	0.251485	0.113245	0.314857	0.162276	0	0	phosphoglycerate_mutase_family_member_4
ENSG00000242215	0.514789	0.058827	0.0211224	0.133975	0.0690499	0	0	no_fct
ENSG00000115271	0.514752	1.02498	0.0980318	0.291912	0.15045	0	0	grancalcin,_EF-hand_calcium_binding_protein
ENSG00000163002	0.514213	0.488886	0.00711046	0.0805174	0.0414983	0	0	nucleoporin_35kDa
ENSG00000134058	0.51403	0.199414	0.0193625	0.128455	0.066205	0	0	cyclin-dependent_kinase_7
ENSG00000116815	0.513639	0.22797	0.0463521	0.197679	0.101883	0	0	CD58_molecule
ENSG00000161381	0.513529	-0.283159	0.0618941	0.229335	0.118199	0	0	plexin_domain_containing_1
ENSG00000185022	0.513528	0.753641	0.0137683	0.109801	0.0565908	0	0	v-maf_musculoaponeurotic_fibrosarcoma_oncogene_homolog_F_(avian)
ENSG00000081189	0.513112	0.559993	0.0601408	0.226606	0.116792	0	0	myocyte_enhancer_factor_2C
ENSG00000230084	0.51301	-0.268318	0.158394	0.376349	0.193968	0	0	no_fct
ENSG00000196436	0.512585	0.0187111	0.106504	0.304289	0.156829	0	0	no_fct
ENSG00000136802	0.512378	0.196479	0.0273902	0.152113	0.0783982	0	0	leucine_rich_repeat_containing_8_family,_member_A
ENSG00000110723	0.511336	-0.40021	0.144455	0.358272	0.184652	0	0	exophilin_5
ENSG00000129226	0.511236	0.521226	0.0136616	0.109456	0.0564133	0	0	CD68_molecule
ENSG00000211448	0.510832	-0.912698	0.116613	0.320212	0.165036	0	0	deiodinase,_iodothyronine,_type_II
ENSG00000142961	0.510491	0.528552	0.000561628	0.0290984	0.0149972	0	0	MOB1,_Mps_One_Binder_kinase_activator-like_2C_(yeast)
ENSG00000158164	0.510366	0.220303	0.108419	0.307167	0.158313	0	0	thymosin_beta_15a
ENSG00000115556	0.509049	-0.159331	0.0264651	0.149887	0.0772512	0	0	phospholipase_C,_delta_4
ENSG00000125538	0.508947	-0.357466	0.184784	0.407522	0.210035	0	0	interleukin_1,_beta
ENSG00000135269	0.508728	0.359424	0.0285725	0.155093	0.0799343	0	0	testis_derived_transcript_(3_LIM_domains)
ENSG00000119950	0.508709	0.289789	0.00891317	0.0884701	0.0455971	0	0	MAX_interactor_1
ENSG00000116977	0.508688	0.31587	0.00884038	0.0881043	0.0454086	0	0	lectin,_galactoside-binding,_soluble,_8
ENSG00000130940	0.508085	0.52824	0.0124401	0.103797	0.0534964	0	0	castor_zinc_finger_1
ENSG00000131013	0.507551	-0.0132041	0.00565211	0.0732533	0.0377545	0	0	peptidylprolyl_isomerase_(cyclophilin)-like_4
ENSG00000106588	0.506819	0.309781	0.140803	0.353207	0.182042	0	0	proteasome_(prosome,_macropain)_subunit,_alpha_type,_2
ENSG00000170379	0.506762	0.247494	0.00306207	0.0563662	0.0290509	0	0	family_with_sequence_similarity_115,_member_C
ENSG00000146350	0.506723	-0.207463	0.0717723	0.248417	0.128033	0	0	chromosome_6_open_reading_frame_170
ENSG00000149380	0.506484	0.21536	0.0160607	0.117305	0.0604586	0	0	prolyl_4-hydroxylase,_alpha_polypeptide_III
ENSG00000203805	0.506231	-0.274382	0.0110417	0.0986181	0.0508273	0	0	phosphatidic_acid_phosphatase_type_2_domain_containing_1A
ENSG00000101342	0.506158	0.85428	0.0978543	0.291797	0.150391	0	0	chromosome_20_open_reading_frame_118
ENSG00000241680	0.505927	2.58507	0.640952	0.796432	0.410477	0	0	no_fct
ENSG00000189143	0.505839	-0.0885587	0.19614	0.419241	0.216075	0	0	claudin_4
ENSG00000120690	0.505074	0.269606	0.0122725	0.103326	0.0532536	0	0	E74-like_factor_1_(ets_domain_transcription_factor)
ENSG00000196954	0.504944	0.320822	0.000629383	0.0303075	0.0156204	0	0	caspase_4,_apoptosis-related_cysteine_peptidase
ENSG00000254109	0.504693	0.118153	0.025674	0.147525	0.0760338	0	0	no_fct
ENSG00000247400	0.504288	-0.169603	0.0862206	0.27293	0.140667	0	0	no_fct
ENSG00000256849	0.504159	0.640556	0.274694	0.501396	0.258417	0	0	no_fct
ENSG00000197312	0.503969	0.0564314	0.00525021	0.0710492	0.0366185	0	0	DNA-damage_inducible_1_homolog_2_(S._cerevisiae)
ENSG00000164182	0.502494	0.196571	0.00496543	0.0696688	0.035907	0	0	NADH_dehydrogenase_(ubiquinone)_1_alpha_subcomplex,_assembly_factor_2
ENSG00000164136	0.502034	0.288397	0.0507197	0.207189	0.106784	0	0	interleukin_15
ENSG00000105486	0.501952	0.281511	0.0295615	0.157321	0.0810827	0	0	ligase_I,_DNA,_ATP-dependent
ENSG00000234664	0.501797	-0.00817779	0.0124362	0.103797	0.0534964	0	0	high_mobility_group_nucleosomal_binding_domain_2_pseudogene_5
ENSG00000004660	0.501647	0.238961	0.120862	0.32616	0.168101	0	0	calcium/calmodulin-dependent_protein_kinase_kinase_1,_alpha
ENSG00000095951	0.501356	0.118917	0.0327929	0.165996	0.0855535	0	0	human_immunodeficiency_virus_type_I_enhancer_binding_protein_1
ENSG00000110925	0.50133	0.34325	0.000670043	0.0310767	0.0160168	0	0	cysteine-serine-rich_nuclear_protein_2
ENSG00000109814	0.50111	0.0782924	0.00319805	0.0578638	0.0298227	0	0	UDP-glucose_6-dehydrogenase
ENSG00000254851	0.500941	0.0277931	0.151355	0.367216	0.189262	0	0	no_fct
ENSG00000253919	0.500826	0.000709844	0.0664484	0.237988	0.122658	0	0	no_fct
ENSG00000028116	0.500295	0.205351	0.0212789	0.134451	0.0692955	0	0	vaccinia_related_kinase_2
ENSG00000254254	0.500166	-0.153657	0.00628727	0.0768186	0.039592	0	0	no_fct
ENSG00000197147	0.499848	0.415095	0.35754	0.577576	0.29768	0	0	leucine_rich_repeat_containing_8_family,_member_B
ENSG00000155744	0.499709	-0.0767429	0.0163593	0.118253	0.0609472	0	0	family_with_sequence_similarity_126,_member_B
ENSG00000175105	0.499325	0.0981919	0.0713622	0.247697	0.127662	0	0	zinc_finger_protein_654
ENSG00000152413	0.499218	0.347561	0.108244	0.307092	0.158274	0	0	homer_homolog_1_(Drosophila)
ENSG00000139946	0.499185	-0.353886	0.0629676	0.231806	0.119472	0	0	pellino_homolog_2_(Drosophila)
ENSG00000131778	0.498718	0.0997462	0.00841848	0.0864963	0.0445798	0	0	chromodomain_helicase_DNA_binding_protein_1-like
ENSG00000153922	0.498697	0.0399208	0.00811582	0.0851277	0.0438745	0	0	chromodomain_helicase_DNA_binding_protein_1
ENSG00000135211	0.498291	0.353521	0.0106086	0.0968635	0.049923	0	0	transmembrane_protein_60
ENSG00000058804	0.498258	0.239426	0.0123102	0.103378	0.0532805	0	0	transmembrane_protein_48
ENSG00000101574	0.498206	0.171662	0.00622315	0.0764766	0.0394157	0	0	methyltransferase_like_4
ENSG00000155561	0.498066	0.362002	0.00848441	0.0868298	0.0447517	0	0	nucleoporin_205kDa
ENSG00000051180	0.497079	0.609237	0.032819	0.165996	0.0855535	0	0	RAD51_homolog_(S._cerevisiae)
ENSG00000249992	0.497062	0.376592	0.0125032	0.104146	0.0536763	0	0	no_fct
ENSG00000169991	0.497033	-0.0527593	0.0047963	0.0688328	0.0354761	0	0	intermediate_filament_family_orphan_2
ENSG00000141527	0.496912	-0.176185	0.203953	0.427799	0.220486	0	0	caspase_recruitment_domain_family,_member_14
ENSG00000172123	0.496787	0.566692	0.101329	0.296213	0.152667	0	0	schlafen_family_member_12
ENSG00000173451	0.496247	0.044527	0.0997925	0.294355	0.151709	0	0	THAP_domain_containing,_apoptosis_associated_protein_2
ENSG00000110328	0.496225	0.294991	0.040564	0.184483	0.0950817	0	0	UDP-N-acetyl-alpha-D-galactosamine:polypeptide_N-acetylgalactosaminyltransferase-like_4
ENSG00000138792	0.496096	1.01667	0.177639	0.400409	0.206369	0	0	glutamyl_aminopeptidase_(aminopeptidase_A)
ENSG00000171793	0.496017	0.252001	0.0042247	0.0652632	0.0336364	0	0	CTP_synthase
ENSG00000255121	0.495967	-0.26352	0.0456945	0.19575	0.100889	0	0	no_fct
ENSG00000115687	0.495899	0.166607	0.0122703	0.103326	0.0532536	0	0	PAS_domain_containing_serine/threonine_kinase
ENSG00000135148	0.495826	0.467226	0.00669754	0.0791179	0.040777	0	0	TRAF-type_zinc_finger_domain_containing_1
ENSG00000096746	0.49574	0.123094	0.00150086	0.0435457	0.0224433	0	0	heterogeneous_nuclear_ribonucleoprotein_H3_(2H9)
ENSG00000114520	0.495445	0.037763	0.00821116	0.085358	0.0439931	0	0	sorting_nexin_4
ENSG00000117000	0.495006	0.0561752	0.0358762	0.173408	0.0893737	0	0	rearranged_L-myc_fusion
ENSG00000254206	0.494947	0.0536062	0.261386	0.487696	0.251356	0	0	no_fct
ENSG00000142627	0.49494	0.290912	0.00578308	0.0740879	0.0381846	0	0	EPH_receptor_A2
ENSG00000064309	0.494917	-0.0827972	0.106863	0.3047	0.157041	0	0	Cdon_homolog_(mouse)
ENSG00000152137	0.494715	0.0403263	0.00216324	0.0483287	0.0249084	0	0	heat_shock_22kDa_protein_8
ENSG00000253200	0.494667	-0.111328	0.0155251	0.115759	0.0596619	0	0	no_fct
ENSG00000112118	0.494613	0.182049	0.0100473	0.0941978	0.0485491	0	0	minichromosome_maintenance_complex_component_3
ENSG00000236682	0.494512	-0.321568	0.152729	0.368968	0.190165	0	0	no_fct
ENSG00000106366	0.494404	0.0607087	0.0015896	0.044286	0.0228248	0	0	serpin_peptidase_inhibitor,_clade_E_(nexin,_plasminogen_activator_inhibitor_type_1),_member_1
ENSG00000096872	0.494084	-0.174701	0.0470766	0.19928	0.102708	0	0	intraflagellar_transport_74_homolog_(Chlamydomonas)
ENSG00000183793	0.494083	-0.0196555	0.00402782	0.0634899	0.0327224	0	0	no_fct
ENSG00000241990	0.493687	0.228356	0.0118616	0.101666	0.0523984	0	0	no_fct
ENSG00000256204	0.493526	0.232607	0.20453	0.428519	0.220857	0	0	no_fct
ENSG00000171811	0.493433	-0.137683	0.0356089	0.172874	0.0890983	0	0	chromosome_10_open_reading_frame_93
ENSG00000176728	0.493362	-0.138885	0.0626233	0.231106	0.119111	0	0	testis-specific_transcript,_Y-linked_14_(non-protein_coding)
ENSG00000158457	0.493278	1.66776	0.190001	0.412762	0.212736	0	0	tetraspanin_33
ENSG00000110446	0.493183	1.48973	0.0839687	0.26989	0.1391	0	0	solute_carrier_family_15,_member_3
ENSG00000086544	0.492571	-0.0415221	0.0288601	0.155564	0.0801769	0	0	inositol-trisphosphate_3-kinase_C
ENSG00000168476	0.492483	0.163768	0.011171	0.0991103	0.051081	0	0	receptor_accessory_protein_4
ENSG00000005059	0.492421	0.364724	0.0102756	0.0953655	0.049151	0	0	coiled-coil_domain_containing_109B
ENSG00000164694	0.492285	0.0492803	0.0896728	0.2787	0.143641	0	0	fibronectin_type_III_domain_containing_1
ENSG00000073712	0.492229	0.00615574	0.00864641	0.0877768	0.0452398	0	0	fermitin_family_member_2
ENSG00000187498	0.491518	0.0776142	0.0274228	0.152113	0.0783982	0	0	collagen,_type_IV,_alpha_1
ENSG00000041357	0.491102	0.341755	0.0236502	0.141824	0.0730954	0	0	proteasome_(prosome,_macropain)_subunit,_alpha_type,_4
ENSG00000236735	0.490821	0.718036	0.221163	0.444805	0.22925	0	0	no_fct
ENSG00000107371	0.490634	0.141895	0.00423158	0.0652632	0.0336364	0	0	exosome_component_3
ENSG00000091428	0.490221	0.514727	0.0470392	0.19928	0.102708	0	0	Rap_guanine_nucleotide_exchange_factor_(GEF)_4
ENSG00000239713	0.490112	0.984198	0.045078	0.194961	0.100482	0	0	apolipoprotein_B_mRNA_editing_enzyme,_catalytic_polypeptide-like_3G
ENSG00000180672	0.490037	-0.121777	0.0229223	0.140086	0.0721998	0	0	no_fct
ENSG00000143398	0.48979	0.12269	0.00311654	0.0567896	0.0292691	0	0	phosphatidylinositol-4-phosphate_5-kinase,_type_I,_alpha
ENSG00000168394	0.489613	1.34578	0.0488373	0.20288	0.104563	0	0	transporter_1,_ATP-binding_cassette,_sub-family_B_(MDR/TAP)
ENSG00000119397	0.489552	-0.0842898	0.00452904	0.0673876	0.0347313	0	0	centriolin
ENSG00000113389	0.489482	0.17103	0.0187673	0.126404	0.0651483	0	0	natriuretic_peptide_receptor_C/guanylate_cyclase_C_(atrionatriuretic_peptide_receptor_C)
ENSG00000196230	0.489251	0.0943274	0.00424469	0.0653132	0.0336621	0	0	tubulin,_beta
ENSG00000158201	0.488847	0.345805	0.00165644	0.0448948	0.0231386	0	0	abhydrolase_domain_containing_3
ENSG00000198142	0.488298	-0.0319437	0.0013462	0.0411433	0.0212051	0	0	ankyrin_repeat_domain_57
ENSG00000101945	0.488087	0.325143	0.0143378	0.111533	0.0574837	0	0	suppressor_of_variegation_3-9_homolog_1_(Drosophila)
ENSG00000197355	0.488047	0.332249	0.0660138	0.237366	0.122337	0	0	UDP-N-acteylglucosamine_pyrophosphorylase_1-like_1
ENSG00000161326	0.487884	0.22718	0.00217167	0.0483287	0.0249084	0	0	dual_specificity_phosphatase_14
ENSG00000106392	0.487683	0.198113	0.0346279	0.170017	0.0876261	0	0	core_1_synthase,_glycoprotein-N-acetylgalactosamine_3-beta-galactosyltransferase,_1
ENSG00000168826	0.487038	0.127405	0.00803971	0.084971	0.0437937	0	0	zinc_finger_and_BTB_domain_containing_49
ENSG00000101935	0.486821	-0.00651678	0.0109553	0.0982725	0.0506492	0	0	Alport_syndrome,_mental_retardation,_midface_hypoplasia_and_elliptocytosis_chromosomal_region_gene_1
ENSG00000171246	0.486407	0.783567	0.203053	0.426641	0.219889	0	0	neuronal_pentraxin_I
ENSG00000246981	0.486331	0.38671	0.0140729	0.110465	0.0569334	0	0	no_fct
ENSG00000198863	0.485863	0.118783	0.000270301	0.0235469	0.012136	0	0	RUN_domain_containing_1
ENSG00000117133	0.485422	0.225233	0.0355798	0.172789	0.0890548	0	0	ribosome_production_factor_1_homolog_(S._cerevisiae)
ENSG00000173193	0.484869	1.36392	0.0975741	0.291534	0.150256	0	0	poly_(ADP-ribose)_polymerase_family,_member_14
ENSG00000197579	0.484824	0.0832433	0.0187167	0.126179	0.0650323	0	0	topoisomerase_I_binding,_arginine/serine-rich,_E3_ubiquitin_protein_ligase
ENSG00000134333	0.484467	0.130488	0.0490488	0.203392	0.104828	0	0	lactate_dehydrogenase_A
ENSG00000240429	0.48437	0.247693	0.0314954	0.161655	0.0833165	0	0	no_fct
ENSG00000136052	0.483603	0.240593	0.00387671	0.0625976	0.0322625	0	0	solute_carrier_family_41,_member_2
ENSG00000245556	0.48326	0.730002	0.0772867	0.25809	0.133019	0	0	no_fct
ENSG00000254615	0.482955	0.256984	0.0191383	0.127675	0.0658034	0	0	no_fct
ENSG00000152242	0.482236	0.0226099	0.0138663	0.110101	0.0567456	0	0	chromosome_18_open_reading_frame_25
ENSG00000151883	0.481796	0.495241	0.0503602	0.20662	0.106491	0	0	poly_(ADP-ribose)_polymerase_family,_member_8
ENSG00000164465	0.481548	0.0884694	0.00886529	0.0881678	0.0454413	0	0	discoidin,_CUB_and_LCCL_domain_containing_1
ENSG00000166145	0.481502	0.244346	0.109575	0.309138	0.159329	0	0	serine_peptidase_inhibitor,_Kunitz_type_1
ENSG00000171488	0.481344	0.171343	0.00504506	0.0701952	0.0361783	0	0	leucine_rich_repeat_containing_8_family,_member_C
ENSG00000254244	0.481343	0.697355	0.163728	0.383082	0.197439	0	0	no_fct
ENSG00000032219	0.480707	-0.175117	0.0431566	0.190412	0.0981376	0	0	AT_rich_interactive_domain_4A_(RBP1-like)
ENSG00000196081	0.480656	0.157703	0.322645	0.546661	0.281746	0	0	zinc_finger_protein_724,_pseudogene
ENSG00000153898	0.480453	0.24406	0.0407064	0.184869	0.0952807	0	0	mucolipin_2
ENSG00000163170	0.480035	0.22337	0.00666731	0.07903	0.0407317	0	0	bolA_homolog_3_(E._coli)
ENSG00000213397	0.479984	0.0204425	0.151232	0.367183	0.189245	0	0	HAUS_augmin-like_complex,_subunit_7
ENSG00000131979	0.479687	1.1419	0.0609449	0.227865	0.117441	0	0	GTP_cyclohydrolase_1
ENSG00000134245	0.479037	-0.164682	0.00152237	0.0439099	0.022631	0	0	wingless-type_MMTV_integration_site_family,_member_2B
ENSG00000108515	0.478947	0.746966	0.386407	0.603211	0.310892	0	0	enolase_3_(beta,_muscle)
ENSG00000135655	0.478796	0.30098	0.0424712	0.189261	0.0975445	0	0	ubiquitin_specific_peptidase_15
ENSG00000178295	0.478678	0.124382	0.00801592	0.084971	0.0437937	0	0	Gen_homolog_1,_endonuclease_(Drosophila)
ENSG00000204397	0.478517	0.914018	0.140701	0.353073	0.181972	0	0	caspase_recruitment_domain_family,_member_16
ENSG00000147874	0.478427	0.00540518	0.00778692	0.0837497	0.0431642	0	0	HAUS_augmin-like_complex,_subunit_6
ENSG00000150477	0.478068	-0.0174716	0.0663797	0.237988	0.122658	0	0	KIAA1328
ENSG00000113838	0.478054	-0.0524361	0.00954283	0.0920106	0.0474219	0	0	TBCC_domain_containing_1
ENSG00000101745	0.477935	-0.00689493	0.0250623	0.14547	0.0749748	0	0	ankyrin_repeat_domain_12
ENSG00000214595	0.477891	0.516706	0.0314483	0.161637	0.083307	0	0	echinoderm_microtubule_associated_protein_like_6
ENSG00000141562	0.477632	0.165666	0.00221431	0.0486061	0.0250514	0	0	nuclear_prelamin_A_recognition_factor
ENSG00000070182	0.477514	-0.328557	0.0699864	0.244653	0.126093	0	0	spectrin,_beta,_erythrocytic
ENSG00000158163	0.477397	0.277344	0.0231083	0.14061	0.0724699	0	0	DAZ_interacting_protein_1-like
ENSG00000039139	0.47737	-0.118666	0.0835877	0.269289	0.138791	0	0	dynein,_axonemal,_heavy_chain_5
ENSG00000143156	0.477192	0.308177	0.024944	0.145317	0.074896	0	0	non-metastatic_cells_7,_protein_expressed_in_(nucleoside-diphosphate_kinase)
ENSG00000173276	0.476722	0.191496	0.0171119	0.120959	0.0623417	0	0	zinc_finger_protein_295
ENSG00000129646	0.476603	-0.0991445	0.0104784	0.0960352	0.0494962	0	0	glutamine_rich_2
ENSG00000123737	0.476565	0.326996	0.0561262	0.21888	0.11281	0	0	exosome_component_9
ENSG00000255773	0.47655	0.0880737	0.0959323	0.288936	0.148916	0	0	no_fct
ENSG00000184363	0.476447	-0.27901	0.0447602	0.194053	0.100014	0	0	plakophilin_3
ENSG00000146674	0.475488	-0.300398	0.0528777	0.211673	0.109095	0	0	insulin-like_growth_factor_binding_protein_3
ENSG00000135605	0.475207	0.345859	0.178747	0.401369	0.206864	0	0	tec_protein_tyrosine_kinase
ENSG00000231549	0.475096	0.747081	0.203013	0.426618	0.219877	0	0	no_fct
ENSG00000136040	0.475046	0.0440323	0.0182706	0.124737	0.0642888	0	0	plexin_C1
ENSG00000108559	0.474968	0.230705	0.00449032	0.0670929	0.0345794	0	0	nucleoporin_88kDa
ENSG00000102837	0.47469	-0.104817	0.049616	0.204562	0.105431	0	0	olfactomedin_4
ENSG00000237276	0.4746	0.98331	0.202612	0.426166	0.219644	0	0	no_fct
ENSG00000175322	0.474535	-0.0214155	0.0817455	0.266034	0.137113	0	0	zinc_finger_protein_519
ENSG00000123353	0.474303	0.24362	0.00485605	0.0689502	0.0355366	0	0	ORM1-like_2_(S._cerevisiae)
ENSG00000138760	0.474184	0.467615	0.0110761	0.0987449	0.0508927	0	0	scavenger_receptor_class_B,_member_2
ENSG00000117643	0.473503	-0.319703	0.288428	0.514223	0.265028	0	0	mannosidase,_alpha,_class_1C,_member_1
ENSG00000155330	0.473365	0.208327	0.0244257	0.14376	0.0740932	0	0	chromosome_16_open_reading_frame_87
ENSG00000075624	0.473284	-0.060488	0.00483647	0.0689003	0.0355109	0	0	actin,_beta
ENSG00000185499	0.472908	0.163337	0.0052692	0.07111	0.0366498	0	0	mucin_1,_cell_surface_associated
ENSG00000148339	0.47246	0.282985	0.00273275	0.0536699	0.0276612	0	0	solute_carrier_family_25_(mitochondrial_carrier;_phosphate_carrier),_member_25
ENSG00000094841	0.472166	0.112721	0.00139104	0.0415055	0.0213917	0	0	uracil_phosphoribosyltransferase_(FUR1)_homolog_(S._cerevisiae)
ENSG00000155287	0.472009	1.04149	0.00306546	0.0563662	0.0290509	0	0	solute_carrier_family_25,_member_28
ENSG00000198576	0.471862	-0.0491507	0.281042	0.507544	0.261586	0	0	activity-regulated_cytoskeleton-associated_protein
ENSG00000176225	0.471764	0.164975	0.00915644	0.0896746	0.0462179	0	0	rotatin
ENSG00000255909	0.471704	-0.615877	0.186646	0.409786	0.211202	0	0	no_fct
ENSG00000131386	0.471632	-0.351852	0.186153	0.409131	0.210864	0	0	UDP-N-acetyl-alpha-D-galactosamine:polypeptide_N-acetylgalactosaminyltransferase-like_2
ENSG00000163644	0.471344	1.23858	0.210251	0.434095	0.223731	0	0	protein_phosphatase,_Mg2+/Mn2+_dependent,_1K
ENSG00000119514	0.47114	0.507676	0.0100699	0.0942821	0.0485926	0	0	UDP-N-acetyl-alpha-D-galactosamine:polypeptide_N-acetylgalactosaminyltransferase_12_(GalNAc-T12)
ENSG00000136715	0.471131	0.427091	0.00326509	0.0582496	0.0300216	0	0	Sin3A-associated_protein,_130kDa
ENSG00000131725	0.470367	0.163803	0.00622069	0.0764766	0.0394157	0	0	WD_repeat_domain_44
ENSG00000160781	0.47027	0.232199	0.0815156	0.265521	0.136849	0	0	progestin_and_adipoQ_receptor_family_member_VI
ENSG00000179021	0.470139	0.374656	0.0140013	0.11024	0.0568174	0	0	chromosome_3_open_reading_frame_38
ENSG00000112941	0.470067	0.341528	0.00459987	0.0675909	0.034836	0	0	PAP_associated_domain_containing_7
ENSG00000110218	0.469963	0.367056	0.0387872	0.17989	0.0927144	0	0	pannexin_1
ENSG00000156313	0.469913	0.109578	0.0267207	0.150656	0.0776474	0	0	retinitis_pigmentosa_GTPase_regulator
ENSG00000243649	0.469505	0.920727	0.196012	0.419102	0.216003	0	0	complement_factor_B
ENSG00000215319	0.469395	0.029454	0.113507	0.315326	0.162518	0	0	no_fct
ENSG00000102144	0.469334	0.304538	0.0291548	0.156008	0.0804061	0	0	phosphoglycerate_kinase_1
ENSG00000229811	0.468785	-0.00842458	0.109054	0.308278	0.158885	0	0	no_fct
ENSG00000242086	0.46837	-0.0963504	0.0337308	0.167981	0.0865766	0	0	no_fct
ENSG00000105989	0.468015	-0.298231	0.087166	0.274755	0.141608	0	0	wingless-type_MMTV_integration_site_family_member_2
ENSG00000122482	0.467972	-0.0140102	0.0427051	0.189844	0.0978445	0	0	zinc_finger_protein_644
ENSG00000089280	0.467604	0.124428	0.00326061	0.0582496	0.0300216	0	0	fused_in_sarcoma
ENSG00000204745	0.467566	-0.694541	0.310533	0.535706	0.276101	0	0	no_fct
ENSG00000113296	0.467344	-0.186522	0.0632648	0.232192	0.119671	0	0	thrombospondin_4
ENSG00000213988	0.467323	0.114905	0.144967	0.358881	0.184966	0	0	zinc_finger_protein_90
ENSG00000101624	0.467233	0.0882518	0.0659614	0.237235	0.12227	0	0	centrosomal_protein_76kDa
ENSG00000124635	0.467213	0.336098	0.244779	0.471239	0.242874	0	0	histone_cluster_1,_H2bj
ENSG00000162654	0.466868	1.71015	0.203427	0.427123	0.220137	0	0	guanylate_binding_protein_4
ENSG00000179008	0.4668	0.225297	0.0115637	0.100533	0.0518144	0	0	chromosome_14_open_reading_frame_39
ENSG00000006625	0.466519	0.124238	0.0126965	0.105102	0.0541689	0	0	gamma-glutamylcyclotransferase
ENSG00000238018	0.466445	0.0289341	0.132744	0.343114	0.17684	0	0	no_fct
ENSG00000187837	0.466167	-0.0145494	0.0273184	0.152102	0.0783928	0	0	histone_cluster_1,_H1c
ENSG00000105402	0.465985	0.584859	0.00519707	0.0709838	0.0365847	0	0	N-ethylmaleimide-sensitive_factor_attachment_protein,_alpha
ENSG00000169203	0.465981	-0.182811	0.59869	0.768409	0.396034	0	0	no_fct
ENSG00000221914	0.465699	0.279129	0.0248647	0.145085	0.0747764	0	0	protein_phosphatase_2,_regulatory_subunit_B,_alpha
ENSG00000136982	0.465259	0.25206	0.0359065	0.173408	0.0893737	0	0	defective_in_sister_chromatid_cohesion_1_homolog_(S._cerevisiae)
ENSG00000154380	0.465243	-0.0583813	0.00560336	0.0729429	0.0375944	0	0	enabled_homolog_(Drosophila)
ENSG00000105329	0.464984	-0.0263915	0.0351374	0.171319	0.0882973	0	0	transforming_growth_factor,_beta_1
ENSG00000100027	0.464823	-0.258706	0.180504	0.403283	0.20785	0	0	yippee-like_1_(Drosophila)
ENSG00000149089	0.464489	0.0488831	0.0176738	0.12265	0.0632133	0	0	APAF1_interacting_protein
ENSG00000163694	0.464397	0.193188	0.22004	0.4437	0.228681	0	0	RNA_binding_motif_protein_47
ENSG00000185972	0.464001	0.451422	0.219147	0.442776	0.228205	0	0	calicin
ENSG00000132185	0.463974	0.295769	0.150888	0.366748	0.18902	0	0	Fc_receptor-like_A
ENSG00000124201	0.463834	1.01306	0.0129383	0.106099	0.0546832	0	0	zinc_finger,_NFX1-type_containing_1
ENSG00000183346	0.463406	-0.221455	0.235503	0.461101	0.237649	0	0	chromosome_10_open_reading_frame_107
ENSG00000118257	0.463317	0.0444972	0.00304319	0.0561689	0.0289492	0	0	neuropilin_2
ENSG00000130720	0.462875	0.200459	0.189789	0.412743	0.212726	0	0	fibrinogen_C_domain_containing_1
ENSG00000231672	0.46233	-0.421295	0.214289	0.438227	0.225861	0	0	no_fct
ENSG00000104312	0.462223	0.290101	0.0028848	0.0550277	0.028361	0	0	receptor-interacting_serine-threonine_kinase_2
ENSG00000137185	0.461995	0.0440337	0.00381725	0.0619093	0.0319078	0	0	zinc_finger_protein_193
ENSG00000160352	0.46198	0.213767	0.0828733	0.267985	0.138119	0	0	zinc_finger_protein_714
ENSG00000132256	0.461768	0.875036	0.0341218	0.168913	0.087057	0	0	tripartite_motif_containing_5
ENSG00000223960	0.461707	0.814225	0.170728	0.391958	0.202013	0	0	no_fct
ENSG00000151338	0.461464	0.0875137	0.0339999	0.168723	0.0869593	0	0	mirror-image_polydactyly_1
ENSG00000100003	0.461185	-0.176614	0.015022	0.114348	0.0589345	0	0	SEC14-like_2_(S._cerevisiae)
ENSG00000229431	0.460928	-0.00524147	0.0922701	0.283123	0.145921	0	0	no_fct
ENSG00000175691	0.460884	0.0472811	0.0373613	0.176375	0.090903	0	0	zinc_finger_protein_77
ENSG00000162639	0.460833	-0.102765	0.0151756	0.114817	0.059176	0	0	HEN1_methyltransferase_homolog_1_(Arabidopsis)
ENSG00000130813	0.460551	1.11465	0.0499859	0.205676	0.106005	0	0	chromosome_19_open_reading_frame_66
ENSG00000163635	0.460516	0.235201	0.0247802	0.144707	0.0745812	0	0	ataxin_7
ENSG00000175643	0.460374	0.273132	0.0428385	0.190067	0.0979596	0	0	RMI2,_RecQ_mediated_genome_instability_2,_homolog_(S._cerevisiae)
ENSG00000143384	0.46036	0.262858	0.00455357	0.0675232	0.0348011	0	0	myeloid_cell_leukemia_sequence_1_(BCL2-related)
ENSG00000042429	0.460257	0.116269	0.00820498	0.085358	0.0439931	0	0	mediator_complex_subunit_17
ENSG00000180233	0.459557	0.314996	0.0995589	0.294041	0.151548	0	0	zinc_and_ring_finger_2
ENSG00000172172	0.459145	0.137519	0.0202768	0.130932	0.0674818	0	0	mitochondrial_ribosomal_protein_L13
ENSG00000100578	0.459081	0.0459519	0.0287175	0.15525	0.080015	0	0	KIAA0586
ENSG00000233488	0.458963	0.0920193	0.11813	0.322392	0.166159	0	0	Uncharacterized_protein
ENSG00000181381	0.458874	1.3036	0.21492	0.438785	0.226148	0	0	DEAD_(Asp-Glu-Ala-Asp)_box_polypeptide_60-like
ENSG00000077348	0.458648	0.14047	0.0231382	0.140629	0.0724797	0	0	exosome_component_5
ENSG00000067057	0.458407	0.403071	0.0263278	0.149414	0.0770074	0	0	phosphofructokinase,_platelet
ENSG00000146592	0.45812	0.309705	0.0372978	0.176211	0.0908184	0	0	cAMP_responsive_element_binding_protein_5
ENSG00000196597	0.458081	-0.143044	0.0208765	0.13307	0.0685834	0	0	zinc_finger_protein_782
ENSG00000162105	0.457963	-0.122389	0.0841305	0.270151	0.139235	0	0	SH3_and_multiple_ankyrin_repeat_domains_2
ENSG00000246859	0.457951	-0.317596	0.0225517	0.138827	0.071551	0	0	no_fct
ENSG00000230568	0.457932	0.440067	0.250802	0.476962	0.245824	0	0	no_fct
ENSG00000134516	0.457871	0.361384	0.248967	0.47518	0.244906	0	0	dedicator_of_cytokinesis_2
ENSG00000054967	0.457178	0.353086	0.029777	0.157618	0.0812354	0	0	RELT_tumor_necrosis_factor_receptor
ENSG00000136522	0.456883	0.154852	0.0264267	0.14986	0.0772371	0	0	mitochondrial_ribosomal_protein_L47
ENSG00000242687	0.45684	-0.108216	0.0136381	0.109439	0.0564041	0	0	no_fct
ENSG00000213085	0.456657	0.158235	0.140369	0.35277	0.181816	0	0	coiled-coil_domain_containing_19
ENSG00000140987	0.456385	-0.0810377	0.0609478	0.227865	0.117441	0	0	zinc_finger_protein_434
ENSG00000238000	0.45634	1.21189	0.343	0.563935	0.29065	0	0	no_fct
ENSG00000132646	0.455949	0.278325	0.0802072	0.263311	0.135709	0	0	proliferating_cell_nuclear_antigen
ENSG00000118849	0.455319	0.111665	0.0743332	0.253405	0.130604	0	0	retinoic_acid_receptor_responder_(tazarotene_induced)_1
ENSG00000138660	0.455049	0.195886	0.0156013	0.116054	0.0598136	0	0	adaptor-related_protein_complex_1_associated_regulatory_protein
ENSG00000213020	0.454212	0.105355	0.0330561	0.16664	0.0858856	0	0	zinc_finger_protein_611
ENSG00000154721	0.45403	0.205902	0.216849	0.440891	0.227233	0	0	junctional_adhesion_molecule_2
ENSG00000240449	0.453806	0.155171	0.0310348	0.16049	0.0827161	0	0	no_fct
ENSG00000143514	0.453098	0.080823	0.00499685	0.0698704	0.0360109	0	0	tumor_protein_p53_binding_protein,_2
ENSG00000230154	0.453052	0.228819	0.113159	0.314724	0.162207	0	0	no_fct
ENSG00000138378	0.452997	0.3108	0.10024	0.294905	0.151993	0	0	signal_transducer_and_activator_of_transcription_4
ENSG00000138030	0.452918	-0.166346	0.142727	0.355228	0.183083	0	0	ketohexokinase_(fructokinase)
ENSG00000165060	0.452651	-0.0862216	0.00497132	0.0696688	0.035907	0	0	frataxin
ENSG00000117318	0.452479	-0.152832	0.0125634	0.104386	0.0538003	0	0	inhibitor_of_DNA_binding_3,_dominant_negative_helix-loop-helix_protein
ENSG00000234771	0.452344	0.0164766	0.0882638	0.276273	0.14239	0	0	no_fct
ENSG00000256435	0.452103	-0.151826	0.106599	0.304302	0.156836	0	0	no_fct
ENSG00000162616	0.451662	0.0335621	0.0709771	0.246815	0.127207	0	0	DnaJ_(Hsp40)_homolog,_subfamily_B,_member_4
ENSG00000023608	0.451627	-0.0463887	0.00483317	0.0689003	0.0355109	0	0	small_nuclear_RNA_activating_complex,_polypeptide_1,_43kDa
ENSG00000099290	0.451473	-0.0548004	0.0478123	0.201351	0.103775	0	0	family_with_sequence_similarity_21,_member_A
ENSG00000183671	0.451322	0.176744	0.0757505	0.255661	0.131766	0	0	G_protein-coupled_receptor_1
ENSG00000167552	0.450925	0.143939	0.0346391	0.170017	0.0876261	0	0	tubulin,_alpha_1a
ENSG00000138297	0.450848	0.0736304	0.00849551	0.0868298	0.0447517	0	0	translocase_of_inner_mitochondrial_membrane_23_homolog_(yeast)
ENSG00000213194	0.450476	-0.120323	0.109634	0.309246	0.159384	0	0	no_fct
ENSG00000137404	0.45044	0.212865	0.0302343	0.15816	0.0815151	0	0	nurim_(nuclear_envelope_membrane_protein)
ENSG00000126653	0.450216	-0.0627866	0.0226001	0.138925	0.0716012	0	0	nuclear_speckle_splicing_regulatory_protein_1
ENSG00000103540	0.450024	0.0723774	0.0382612	0.178674	0.0920877	0	0	centriolar_coiled_coil_protein_110kDa
ENSG00000232486	0.449265	0.548114	0.377982	0.595759	0.307052	0	0	no_fct
ENSG00000254726	0.449227	0.174528	0.168768	0.389978	0.200993	0	0	mex-3_homolog_A_(C._elegans)
ENSG00000148688	0.449186	0.0441798	0.0169706	0.120539	0.0621254	0	0	ribonuclease_P/MRP_30kDa_subunit
ENSG00000130943	0.449154	-0.602098	0.146748	0.361073	0.186095	0	0	polycystic_kidney_disease_(polycystin)_and_REJ_homolog_(sperm_receptor_for_egg_jelly_homolog,_sea_urchin)
ENSG00000143341	0.448266	-0.16049	0.0574085	0.221787	0.114308	0	0	hemicentin_1
ENSG00000183444	0.448196	0.0839544	0.0200678	0.130111	0.0670586	0	0	no_fct
ENSG00000173588	0.447624	0.021548	0.0163506	0.118253	0.0609472	0	0	coiled-coil_domain_containing_41
ENSG00000101367	0.447312	0.170669	0.00541716	0.0721145	0.0371675	0	0	microtubule-associated_protein,_RP/EB_family,_member_1
ENSG00000135537	0.447219	0.0821421	0.0342027	0.168913	0.087057	0	0	lactation_elevated_1
ENSG00000164610	0.447122	-0.000657653	0.00444914	0.0669191	0.0344898	0	0	retinitis_pigmentosa_9_(autosomal_dominant)
ENSG00000204516	0.447049	0.51334	0.00253357	0.0512639	0.0264212	0	0	MHC_class_I_polypeptide-related_sequence_B
ENSG00000158825	0.446233	-0.109514	0.078617	0.26032	0.134168	0	0	cytidine_deaminase
ENSG00000127666	0.446094	0.236914	0.0368159	0.174902	0.0901438	0	0	toll-like_receptor_adaptor_molecule_1
ENSG00000162290	0.44569	0.338771	0.00922418	0.0899519	0.0463608	0	0	DCP1_decapping_enzyme_homolog_A_(S._cerevisiae)
ENSG00000167565	0.444986	0.23443	0.00154924	0.04426	0.0228114	0	0	SERTA_domain_containing_3
ENSG00000103121	0.444817	0.26388	0.0147281	0.11343	0.0584611	0	0	chromosome_16_open_reading_frame_61
ENSG00000163110	0.444655	0.1416	0.032267	0.164295	0.0846769	0	0	PDZ_and_LIM_domain_5
ENSG00000186603	0.444578	0.0325181	0.235418	0.460995	0.237595	0	0	4-hydroxyphenylpyruvate_dioxygenase-like
ENSG00000111348	0.444531	-0.196276	0.027748	0.15306	0.0788863	0	0	Rho_GDP_dissociation_inhibitor_(GDI)_beta
ENSG00000127863	0.444267	0.122398	0.0138693	0.110101	0.0567456	0	0	tumor_necrosis_factor_receptor_superfamily,_member_19
ENSG00000118997	0.444095	-0.315474	0.38875	0.605646	0.312148	0	0	dynein,_axonemal,_heavy_chain_7
ENSG00000233966	0.443286	0.230883	0.00984111	0.0931549	0.0480116	0	0	no_fct
ENSG00000235989	0.443244	0.0731287	0.00377147	0.0617111	0.0318057	0	0	no_fct
ENSG00000185437	0.443171	-0.0669782	0.0114625	0.100307	0.0516979	0	0	SH3_domain_binding_glutamic_acid-rich_protein
ENSG00000197498	0.442789	-0.0357539	0.00986312	0.0933032	0.0480881	0	0	ribosome_production_factor_2_homolog_(S._cerevisiae)
ENSG00000132423	0.442631	0.0874808	0.047068	0.19928	0.102708	0	0	coenzyme_Q3_homolog,_methyltransferase_(S._cerevisiae)
ENSG00000118200	0.442609	0.0267337	0.0255501	0.147305	0.0759205	0	0	calmodulin_regulated_spectrin-associated_protein_1-like_1
ENSG00000226049	0.442178	0.312523	0.0325047	0.164991	0.0850356	0	0	no_fct
ENSG00000174500	0.441574	0.332762	0.0895835	0.27859	0.143584	0	0	germinal_center_expressed_transcript_2
ENSG00000224415	0.441557	1.0043	0.541667	0.72748	0.37494	0	0	no_fct
ENSG00000228439	0.440422	-0.0550755	0.0843276	0.270429	0.139378	0	0	no_fct
ENSG00000103599	0.440354	-0.229697	0.247649	0.473968	0.244281	0	0	IQ_motif_containing_H
ENSG00000205794	0.440284	0.464018	0.595604	0.766778	0.395194	0	0	no_fct
ENSG00000131503	0.43978	0.0115305	0.168557	0.389915	0.20096	0	0	ankyrin_repeat_and_KH_domain_containing_1
ENSG00000126970	0.439573	0.148872	0.0262054	0.149258	0.0769267	0	0	zinc_finger,_C4H2_domain_containing
ENSG00000131848	0.439531	0.0690318	0.0543653	0.215208	0.110917	0	0	zinc_finger_and_SCAN_domain_containing_5A
ENSG00000176624	0.439218	0.0920457	0.00172741	0.0456413	0.0235233	0	0	mex-3_homolog_C_(C._elegans)
ENSG00000143942	0.438945	0.215201	0.112229	0.313265	0.161456	0	0	ChaC,_cation_transport_regulator_homolog_2_(E._coli)
ENSG00000177425	0.438651	-0.0307318	0.00210252	0.0480036	0.0247409	0	0	PRKC,_apoptosis,_WT1,_regulator
ENSG00000224259	0.438487	0.0532398	0.0451539	0.19507	0.100538	0	0	no_fct
ENSG00000179859	0.438363	0.194749	0.0527644	0.211489	0.109	0	0	no_fct
ENSG00000242208	0.437857	1.1946	0.629917	0.790352	0.407344	0	0	no_fct
ENSG00000180834	0.437683	-0.134079	0.00902734	0.0890624	0.0459024	0	0	MAP6_domain_containing_1
ENSG00000111875	0.437492	0.22069	0.0566573	0.21996	0.113367	0	0	ASF1_anti-silencing_function_1_homolog_A_(S._cerevisiae)
ENSG00000020922	0.437188	0.066643	0.0225029	0.138827	0.071551	0	0	MRE11_meiotic_recombination_11_homolog_A_(S._cerevisiae)
ENSG00000164221	0.437008	0.062694	0.0515844	0.208865	0.107648	0	0	coiled-coil_domain_containing_112
ENSG00000165312	0.436985	-0.0699592	0.0206377	0.132049	0.0680574	0	0	OTU_domain_containing_1
ENSG00000221869	0.436776	-0.00654713	0.0807235	0.264199	0.136167	0	0	CCAAT/enhancer_binding_protein_(C/EBP),_delta
ENSG00000166478	0.436693	0.142212	0.0086547	0.0877834	0.0452432	0	0	zinc_finger_protein_143
ENSG00000236144	0.436382	-0.167675	0.198995	0.422337	0.217671	0	0	no_fct
ENSG00000161835	0.435704	0.132272	0.0572794	0.221498	0.114159	0	0	GRP1_(general_receptor_for_phosphoinositides_1)-associated_scaffold_protein
ENSG00000030110	0.435679	0.254332	0.0244955	0.143901	0.0741661	0	0	BCL2-antagonist/killer_1
ENSG00000234684	0.435625	0.028461	0.0101779	0.094698	0.048807	0	0	no_fct
ENSG00000237298	0.435511	0.212013	0.0732627	0.251252	0.129494	0	0	no_fct
ENSG00000111581	0.435024	0.101585	0.017214	0.121331	0.0625335	0	0	nucleoporin_107kDa
ENSG00000107949	0.43498	0.0577474	0.0117916	0.101645	0.0523875	0	0	BRCA2_and_CDKN1A_interacting_protein
ENSG00000227176	0.434883	0.380951	0.576381	0.75278	0.38798	0	0	no_fct
ENSG00000114473	0.434716	-0.00989501	0.0535979	0.213295	0.109931	0	0	IQ_motif_containing_G
ENSG00000182504	0.434254	0.0406367	0.0537837	0.213605	0.110091	0	0	centrosomal_protein_97kDa
ENSG00000204264	0.434227	0.700391	0.0148271	0.113663	0.0585812	0	0	proteasome_(prosome,_macropain)_subunit,_beta_type,_8_(large_multifunctional_peptidase_7)
ENSG00000149636	0.433809	0.239498	0.0290834	0.155905	0.0803527	0	0	DSN1,_MIND_kinetochore_complex_component,_homolog_(S._cerevisiae)
ENSG00000204923	0.433781	0.0661902	0.0729299	0.251123	0.129428	0	0	F-box_protein_48
ENSG00000161955	0.433697	-0.0101625	0.0577869	0.222588	0.114721	0	0	tumor_necrosis_factor_(ligand)_superfamily,_member_13
ENSG00000116717	0.433194	0.434656	0.00745555	0.0821507	0.0423401	0	0	growth_arrest_and_DNA-damage-inducible,_alpha
ENSG00000100580	0.433134	-0.0325937	0.0225748	0.138827	0.071551	0	0	transmembrane_emp24_protein_transport_domain_containing_8
ENSG00000176788	0.433131	-0.0211476	0.00804654	0.084971	0.0437937	0	0	brain_abundant,_membrane_attached_signal_protein_1
ENSG00000137449	0.433033	0.397878	0.115286	0.318463	0.164135	0	0	cytoplasmic_polyadenylation_element_binding_protein_2
ENSG00000119929	0.432981	0.0193641	0.00741362	0.0819858	0.0422551	0	0	cutC_copper_transporter_homolog_(E._coli)
ENSG00000122970	0.432802	-0.27767	0.0657162	0.236706	0.121997	0	0	intraflagellar_transport_81_homolog_(Chlamydomonas)
ENSG00000171889	0.432782	0.136841	0.0504911	0.206657	0.10651	0	0	no_fct
ENSG00000166579	0.432369	0.171187	0.00675233	0.0792887	0.040865	0	0	nudE_nuclear_distribution_gene_E_homolog_(A._nidulans)-like_1
ENSG00000207700	0.43235	-0.0425912	0.0496338	0.204571	0.105435	0	0	microRNA_145
ENSG00000100558	0.432316	0.368074	0.0537858	0.213605	0.110091	0	0	pleckstrin_2
ENSG00000110435	0.432277	0.122791	0.00473493	0.0684717	0.03529	0	0	pyruvate_dehydrogenase_complex,_component_X
ENSG00000163319	0.432012	0.385484	0.0156126	0.116054	0.0598136	0	0	mitochondrial_ribosomal_protein_S18C
ENSG00000087074	0.431978	0.199242	0.0489454	0.203214	0.104735	0	0	protein_phosphatase_1,_regulatory_(inhibitor)_subunit_15A
ENSG00000143079	0.431886	-0.0292763	0.00683163	0.0796746	0.0410639	0	0	CTTNBP2_N-terminal_like
ENSG00000034063	0.431679	0.027485	0.0153369	0.115238	0.0593933	0	0	ubiquitin-like_with_PHD_and_ring_finger_domains_1
ENSG00000168273	0.431288	0.116451	0.00182732	0.0459486	0.0236817	0	0	no_fct
ENSG00000167653	0.431133	-0.262127	0.306047	0.53158	0.273974	0	0	prostate_stem_cell_antigen
ENSG00000196504	0.431054	0.01056	0.0239749	0.142743	0.0735691	0	0	PRP40_pre-mRNA_processing_factor_40_homolog_A_(S._cerevisiae)
ENSG00000102900	0.430995	0.264134	0.0114047	0.100157	0.0516206	0	0	nucleoporin_93kDa
ENSG00000100442	0.430919	0.181886	0.0380989	0.178353	0.0919221	0	0	FK506_binding_protein_3,_25kDa
ENSG00000165434	0.430822	0.172693	0.0324697	0.16487	0.0849734	0	0	phosphoglucomutase_2-like_1
ENSG00000232176	0.430815	1.52492	0.64262	0.797219	0.410883	0	0	no_fct
ENSG00000058272	0.430778	-0.0906208	0.00667994	0.0791159	0.040776	0	0	protein_phosphatase_1,_regulatory_(inhibitor)_subunit_12A
ENSG00000003096	0.43074	-0.293124	0.380962	0.598458	0.308442	0	0	kelch-like_13_(Drosophila)
ENSG00000101384	0.430359	0.162505	0.036088	0.173595	0.0894702	0	0	jagged_1
ENSG00000146425	0.430293	0.413573	0.00771147	0.0835383	0.0430553	0	0	dynein,_light_chain,_Tctex-type_1
ENSG00000118523	0.430242	0.141051	0.231243	0.455977	0.235009	0	0	connective_tissue_growth_factor
ENSG00000255282	0.430004	-0.121534	0.236331	0.461984	0.238105	0	0	no_fct
ENSG00000108829	0.429952	0.238143	0.00558066	0.0729429	0.0375944	0	0	leucine_rich_repeat_containing_59
ENSG00000137691	0.429914	-0.013121	0.0518828	0.209324	0.107885	0	0	chromosome_11_open_reading_frame_70
ENSG00000240053	0.429895	0.137388	0.184958	0.407661	0.210107	0	0	lymphocyte_antigen_6_complex,_locus_G5B
ENSG00000235272	0.429768	0.165818	0.0482065	0.202019	0.10412	0	0	no_fct
ENSG00000145365	0.429572	0.0601368	0.018895	0.126966	0.0654375	0	0	TRAF-interacting_protein_with_forkhead-associated_domain
ENSG00000132780	0.429563	0.190916	0.0164717	0.118662	0.0611579	0	0	nuclear_autoantigenic_sperm_protein_(histone-binding)
ENSG00000231581	0.429336	-0.234345	0.183994	0.406511	0.209514	0	0	no_fct
ENSG00000169689	0.429033	0.122997	0.0407358	0.184888	0.0952907	0	0	stimulated_by_retinoic_acid_13_homolog_(mouse)
ENSG00000197170	0.428746	-0.0186374	0.0467188	0.19845	0.10228	0	0	proteasome_(prosome,_macropain)_26S_subunit,_non-ATPase,_12
ENSG00000169946	0.428677	0.313468	0.23052	0.455569	0.234798	0	0	zinc_finger_protein,_multitype_2
ENSG00000166510	0.428634	-0.371732	0.553264	0.736984	0.379839	0	0	coiled-coil_domain_containing_68
ENSG00000257054	0.428338	0.115571	0.223054	0.447397	0.230586	0	0	no_fct
ENSG00000140471	0.428271	0.0765513	0.0145728	0.112528	0.0579963	0	0	lines_homolog_(Drosophila)
ENSG00000200534	0.427674	0.340909	0.314294	0.538592	0.277588	0	0	small_nucleolar_RNA,_H/ACA_box_33
ENSG00000247626	0.427625	0.297202	0.0148577	0.113832	0.0586684	0	0	methionyl-tRNA_synthetase_2,_mitochondrial
ENSG00000212907	0.427429	0.146945	0.0639365	0.233492	0.120341	0	0	no_fct
ENSG00000064270	0.427103	-0.138973	0.438318	0.647093	0.333509	0	0	ATPase,_Ca++_transporting,_type_2C,_member_2
ENSG00000070495	0.426589	0.242338	0.00545102	0.0723687	0.0372985	0	0	jumonji_domain_containing_6
ENSG00000144057	0.426018	-0.259864	0.313297	0.538256	0.277415	0	0	ST6_beta-galactosamide_alpha-2,6-sialyltranferase_2
ENSG00000213859	0.425829	-0.00173186	0.00337931	0.0592147	0.030519	0	0	potassium_channel_tetramerisation_domain_containing_11
ENSG00000228232	0.425815	0.586345	0.215713	0.439858	0.226701	0	0	no_fct
ENSG00000166881	0.425711	0.415916	0.0234197	0.141255	0.072802	0	0	transmembrane_protein_194A
ENSG00000138395	0.425456	-0.00268718	0.0140142	0.11024	0.0568174	0	0	cyclin-dependent_kinase_15
ENSG00000182831	0.425381	-0.0506893	0.0225697	0.138827	0.071551	0	0	chromosome_16_open_reading_frame_72
ENSG00000227671	0.424873	0.176581	0.0360253	0.173594	0.0894694	0	0	no_fct
ENSG00000064989	0.424824	0.152061	0.356277	0.576422	0.297085	0	0	calcitonin_receptor-like
ENSG00000169583	0.424171	-0.184315	0.181479	0.404173	0.208309	0	0	chloride_intracellular_channel_3
ENSG00000115053	0.423575	0.0867092	0.00814704	0.0851277	0.0438745	0	0	nucleolin
ENSG00000167513	0.423465	0.360781	0.0877287	0.275393	0.141936	0	0	chromatin_licensing_and_DNA_replication_factor_1
ENSG00000243147	0.423434	-0.0662196	0.034533	0.169731	0.0874788	0	0	mitochondrial_ribosomal_protein_L33
ENSG00000165704	0.423241	0.282724	0.0783699	0.259906	0.133955	0	0	hypoxanthine_phosphoribosyltransferase_1
ENSG00000168040	0.423135	0.318033	0.318894	0.543246	0.279987	0	0	Fas_(TNFRSF6)-associated_via_death_domain
ENSG00000177380	0.423135	0.229685	0.0420407	0.188485	0.0971443	0	0	protein_tyrosine_phosphatase,_receptor_type,_f_polypeptide_(PTPRF),_interacting_protein_(liprin),_alpha_3
ENSG00000119636	0.423095	0.0171708	0.013101	0.106979	0.0551367	0	0	chromosome_14_open_reading_frame_45
ENSG00000203666	0.423086	0.0685327	0.104399	0.301478	0.155381	0	0	EF-hand_calcium_binding_domain_2
ENSG00000166396	0.422956	-0.482057	0.0168524	0.120369	0.0620377	0	0	serpin_peptidase_inhibitor,_clade_B_(ovalbumin),_member_7
ENSG00000227347	0.422913	0.417477	0.252171	0.478451	0.246592	0	0	no_fct
ENSG00000196466	0.422763	-0.046151	0.0610866	0.228009	0.117515	0	0	zinc_finger_protein_799
ENSG00000170727	0.422525	0.161313	0.136386	0.34789	0.179301	0	0	block_of_proliferation_1
ENSG00000165630	0.422495	0.0374264	0.0072484	0.0815792	0.0420456	0	0	PRP18_pre-mRNA_processing_factor_18_homolog_(S._cerevisiae)
ENSG00000162972	0.422338	0.216193	0.0195185	0.128926	0.0664478	0	0	chromosome_2_open_reading_frame_47
ENSG00000150753	0.422168	0.162183	0.00874955	0.0877834	0.0452432	0	0	chaperonin_containing_TCP1,_subunit_5_(epsilon)
ENSG00000070081	0.422097	0.0756514	0.0350507	0.17101	0.0881379	0	0	nucleobindin_2
ENSG00000079462	0.422088	0.158741	0.0553663	0.217357	0.112025	0	0	platelet-activating_factor_acetylhydrolase_1b,_catalytic_subunit_3_(29kDa)
ENSG00000119714	0.422041	0.377167	0.115753	0.319086	0.164455	0	0	G_protein-coupled_receptor_68
ENSG00000188985	0.42197	0.186277	0.0623132	0.230366	0.11873	0	0	no_fct
ENSG00000115816	0.421731	0.153828	0.0240662	0.142943	0.073672	0	0	CCAAT/enhancer_binding_protein_(C/EBP),_zeta
ENSG00000162775	0.421707	0.119661	0.00239055	0.0497383	0.0256349	0	0	RNA_binding_motif_protein_15
ENSG00000174021	0.421638	0.0329022	0.0129466	0.106099	0.0546832	0	0	guanine_nucleotide_binding_protein_(G_protein),_gamma_5
ENSG00000141452	0.421614	0.273472	0.00822825	0.085358	0.0439931	0	0	chromosome_18_open_reading_frame_8
ENSG00000187634	0.421601	-0.73425	0.304734	0.530036	0.273178	0	0	sterile_alpha_motif_domain_containing_11
ENSG00000136869	0.421338	-0.171619	0.0986957	0.292645	0.150828	0	0	toll-like_receptor_4
ENSG00000158079	0.421307	0.0903127	0.0139142	0.110122	0.0567566	0	0	protein_tyrosine_phosphatase_domain_containing_1
ENSG00000235768	0.421227	0.426392	0.280651	0.507398	0.261511	0	0	no_fct
ENSG00000023572	0.421139	0.259186	0.137082	0.348871	0.179807	0	0	glutaredoxin_2
ENSG00000196116	0.421092	1.06186	0.0412092	0.186462	0.0961016	0	0	tudor_domain_containing_7
ENSG00000215807	0.420985	0.9182	0.613735	0.778652	0.401314	0	0	keratin_18_pseudogene_32
ENSG00000205309	0.420946	0.199163	0.073336	0.251345	0.129542	0	0	5',3'-nucleotidase,_mitochondrial
ENSG00000009844	0.420818	0.112136	0.0200457	0.130111	0.0670586	0	0	Vps20-associated_1_homolog_(S._cerevisiae)
ENSG00000198168	0.420787	-0.120365	0.0329395	0.16637	0.0857466	0	0	small_VCP/p97-interacting_protein
ENSG00000126709	0.420326	3.09915	0.186811	0.409965	0.211294	0	0	interferon,_alpha-inducible_protein_6
ENSG00000226328	0.420072	0.055794	0.0982147	0.292102	0.150548	0	0	no_fct
ENSG00000170340	0.419988	0.470442	0.0479038	0.201448	0.103825	0	0	UDP-GlcNAc:betaGal_beta-1,3-N-acetylglucosaminyltransferase_2
ENSG00000198270	0.419502	0.0611071	0.100552	0.294938	0.15201	0	0	transmembrane_protein_116
ENSG00000138639	0.419409	0.110155	0.00206142	0.0478289	0.0246508	0	0	Rho_GTPase_activating_protein_24
ENSG00000132792	0.419289	0.421703	0.0364631	0.173968	0.0896623	0	0	catenin,_beta_like_1
ENSG00000166348	0.41921	0.0806025	0.00296685	0.0556131	0.0286627	0	0	ubiquitin_specific_peptidase_54
ENSG00000172403	0.419102	-0.584407	0.003402	0.0592147	0.030519	0	0	synaptopodin_2
ENSG00000096968	0.41899	0.445298	0.121824	0.327013	0.168541	0	0	Janus_kinase_2
ENSG00000246901	0.418879	-0.0197065	0.0368081	0.174902	0.0901438	0	0	no_fct
ENSG00000152056	0.418863	-0.1623	0.00958438	0.0920299	0.0474318	0	0	adaptor-related_protein_complex_1,_sigma_3_subunit
ENSG00000122966	0.418832	0.0770248	0.0101298	0.0944294	0.0486685	0	0	citron_(rho-interacting,_serine/threonine_kinase_21)
ENSG00000172156	0.41873	0.0206497	0.450596	0.65759	0.338919	0	0	chemokine_(C-C_motif)_ligand_11
ENSG00000168310	0.418569	0.423426	0.0165136	0.118785	0.0612214	0	0	interferon_regulatory_factor_2
ENSG00000108064	0.418344	0.0814785	0.0241099	0.143052	0.0737285	0	0	transcription_factor_A,_mitochondrial
ENSG00000147862	0.418341	0.0270575	0.323706	0.54738	0.282118	0	0	nuclear_factor_I/B
ENSG00000256683	0.418303	0.121853	0.0951544	0.288186	0.14853	0	0	zinc_finger_protein_350
ENSG00000139574	0.418295	-0.209729	0.225551	0.450245	0.232054	0	0	neuropeptide_FF-amide_peptide_precursor
ENSG00000131019	0.418263	0.0525879	0.0145595	0.112528	0.0579963	0	0	UL16_binding_protein_3
ENSG00000115233	0.418225	0.185227	0.00740786	0.0819858	0.0422551	0	0	proteasome_(prosome,_macropain)_26S_subunit,_non-ATPase,_14
ENSG00000164934	0.417944	0.163827	0.0165645	0.119034	0.0613498	0	0	DDB1_and_CUL4_associated_factor_13
ENSG00000157483	0.417578	0.21665	0.0212123	0.134207	0.06917	0	0	myosin_IE
ENSG00000204406	0.417523	-0.000829796	0.0817821	0.266073	0.137133	0	0	methyl-CpG_binding_domain_protein_5
ENSG00000248698	0.417038	0.175667	0.199521	0.422837	0.217928	0	0	no_fct
ENSG00000227741	0.417013	0.0767707	0.083156	0.268427	0.138346	0	0	no_fct
ENSG00000255874	0.416699	-0.043431	0.0201157	0.130296	0.0671541	0	0	non-protein_coding_RNA_346
ENSG00000120334	0.416559	0.261444	0.0274278	0.152113	0.0783982	0	0	centromere_protein_L
ENSG00000120802	0.416405	0.258787	0.0304581	0.15871	0.0817985	0	0	thymopoietin
ENSG00000065526	0.416283	-0.0285774	0.0140529	0.110368	0.0568829	0	0	spen_homolog,_transcriptional_regulator_(Drosophila)
ENSG00000145220	0.415777	0.156499	0.00817978	0.0852761	0.0439509	0	0	Ly1_antibody_reactive_homolog_(mouse)
ENSG00000166439	0.415752	0.0732105	0.00443327	0.0669191	0.0344898	0	0	ring_finger_protein_169
ENSG00000114439	0.415609	0.0581313	0.0400792	0.183436	0.0945423	0	0	bobby_sox_homolog_(Drosophila)
ENSG00000163659	0.415351	0.193149	0.05425	0.214983	0.110801	0	0	TCDD-inducible_poly(ADP-ribose)_polymerase
ENSG00000095203	0.415282	0.00550774	0.339959	0.560686	0.288975	0	0	erythrocyte_membrane_protein_band_4.1_like_4B
ENSG00000118197	0.414822	0.153525	0.0172028	0.121331	0.0625335	0	0	DEAD_(Asp-Glu-Ala-Asp)_box_polypeptide_59
ENSG00000128335	0.414497	0.841498	0.0238677	0.142505	0.0734462	0	0	apolipoprotein_L,_2
ENSG00000171960	0.414217	0.239301	0.0235881	0.141739	0.0730518	0	0	peptidylprolyl_isomerase_H_(cyclophilin_H)
ENSG00000136536	0.414142	0.00349797	0.0123601	0.103541	0.0533645	0	0	membrane-associated_ring_finger_(C3HC4)_7
ENSG00000185838	0.41374	-0.161614	0.306939	0.532486	0.274441	0	0	guanine_nucleotide_binding_protein_(G_protein),_beta_polypeptide_1-like
ENSG00000172939	0.413706	0.159215	0.00948509	0.0916124	0.0472166	0	0	oxidative-stress_responsive_1
ENSG00000154310	0.413537	0.0508836	0.011679	0.101109	0.0521112	0	0	TRAF2_and_NCK_interacting_kinase
ENSG00000250321	0.413355	0.749009	0.328115	0.55049	0.28372	0	0	no_fct
ENSG00000127423	0.413348	0.0440002	0.27119	0.498152	0.256746	0	0	chromosome_1_open_reading_frame_135
ENSG00000227973	0.412864	0.270677	0.140552	0.353061	0.181966	0	0	no_fct
ENSG00000109927	0.412776	0.107053	0.0933821	0.284635	0.1467	0	0	tectorin_alpha
ENSG00000154719	0.412467	0.200636	0.0486872	0.202714	0.104478	0	0	mitochondrial_ribosomal_protein_L39
ENSG00000128849	0.41242	0.516058	0.133198	0.343744	0.177164	0	0	cingulin-like_1
ENSG00000213903	0.412372	0.0989173	0.0273685	0.152113	0.0783982	0	0	leukotriene_B4_receptor
ENSG00000165359	0.411917	0.460541	0.110323	0.310094	0.159821	0	0	DEAD/H_(Asp-Glu-Ala-Asp/His)_box_polypeptide_26B
ENSG00000256073	0.41189	0.000449986	0.145174	0.358976	0.185014	0	0	no_fct
ENSG00000148229	0.411863	0.11466	0.0129498	0.106099	0.0546832	0	0	polymerase_(DNA_directed),_epsilon_3_(p17_subunit)
ENSG00000124787	0.41088	0.13709	0.0183026	0.124759	0.0643005	0	0	ribonuclease_P/MRP_40kDa_subunit
ENSG00000184988	0.410745	0.672766	0.0758674	0.255699	0.131786	0	0	transmembrane_protein_106A
ENSG00000110031	0.41068	0.217773	0.0252662	0.146325	0.0754154	0	0	leupaxin
ENSG00000072501	0.410453	0.144507	0.00501313	0.0700314	0.0360939	0	0	structural_maintenance_of_chromosomes_1A
ENSG00000149929	0.410284	-0.107627	0.045534	0.195519	0.10077	0	0	HIRA_interacting_protein_3
ENSG00000175104	0.410208	0.0800751	0.00617079	0.0760961	0.0392196	0	0	TNF_receptor-associated_factor_6
ENSG00000086827	0.409983	0.0556826	0.0377222	0.177171	0.0913133	0	0	ZW10,_kinetochore_associated,_homolog_(Drosophila)
ENSG00000115363	0.409786	0.303937	0.0289577	0.155596	0.0801936	0	0	family_with_sequence_similarity_176,_member_A
ENSG00000154040	0.409728	0.0262735	0.0455633	0.195519	0.10077	0	0	calcium_binding_tyrosine-(Y)-phosphorylation_regulated
ENSG00000196850	0.409699	0.166484	0.00341798	0.0592907	0.0305581	0	0	PTC7_protein_phosphatase_homolog_(S._cerevisiae)
ENSG00000101811	0.409479	0.0850594	0.00245251	0.0503042	0.0259266	0	0	cleavage_stimulation_factor,_3'_pre-RNA,_subunit_2,_64kDa
ENSG00000183137	0.409312	0.22275	0.0230271	0.140318	0.0723194	0	0	centrosomal_protein_57kDa-like_1
ENSG00000062194	0.409246	0.245517	0.0342341	0.168931	0.0870663	0	0	GC-rich_promoter_binding_protein_1
ENSG00000114023	0.409193	0.119825	0.00340334	0.0592147	0.030519	0	0	family_with_sequence_similarity_162,_member_A
ENSG00000111801	0.408821	0.511902	0.0616554	0.22897	0.11801	0	0	butyrophilin,_subfamily_3,_member_A3
ENSG00000171202	0.408602	0.138948	0.0145428	0.112528	0.0579963	0	0	transmembrane_protein_126A
ENSG00000175305	0.408462	0.223794	0.150212	0.365831	0.188548	0	0	cyclin_E2
ENSG00000182326	0.408158	0.271132	0.0422461	0.188716	0.0972633	0	0	complement_component_1,_s_subcomponent
ENSG00000179532	0.408026	0.187634	0.00802215	0.084971	0.0437937	0	0	dynein_heavy_chain_domain_1
ENSG00000008394	0.407932	0.191315	0.0364325	0.173944	0.0896501	0	0	microsomal_glutathione_S-transferase_1
ENSG00000092929	0.407758	-0.0610684	0.108158	0.307025	0.158239	0	0	unc-13_homolog_D_(C._elegans)
ENSG00000116830	0.407694	0.352523	0.0143277	0.111513	0.0574735	0	0	transcription_termination_factor,_RNA_polymerase_II
ENSG00000124831	0.407639	-0.0108147	0.0025111	0.0510197	0.0262953	0	0	leucine_rich_repeat_(in_FLII)_interacting_protein_1
ENSG00000156787	0.407429	0.0835438	0.0678847	0.240971	0.124195	0	0	WD_repeat_domain_67
ENSG00000168672	0.406993	0.453148	0.291335	0.516659	0.266284	0	0	family_with_sequence_similarity_84,_member_B
ENSG00000233695	0.406959	-0.171578	0.0628794	0.231737	0.119436	0	0	no_fct
ENSG00000196428	0.406742	0.0236838	0.00157363	0.04426	0.0228114	0	0	TSC22_domain_family,_member_2
ENSG00000250748	0.406453	-0.137606	0.244624	0.471079	0.242792	0	0	no_fct
ENSG00000250461	0.406252	-0.257856	0.252653	0.479081	0.246916	0	0	no_fct
ENSG00000128656	0.406217	0.0284812	0.0122923	0.103326	0.0532536	0	0	chimerin_(chimaerin)_1
ENSG00000162840	0.406	0.414241	0.164105	0.383573	0.197692	0	0	metallothionein_1_pseudogene_2
ENSG00000137364	0.405993	0.120106	0.0239808	0.142743	0.0735691	0	0	thiopurine_S-methyltransferase
ENSG00000204392	0.405868	0.237699	0.0193538	0.128455	0.066205	0	0	LSM2_homolog,_U6_small_nuclear_RNA_associated_(S._cerevisiae)
ENSG00000185634	0.40575	0.164912	0.304269	0.52968	0.272995	0	0	SHC_(Src_homology_2_domain_containing)_family,_member_4
ENSG00000137692	0.40555	0.103831	0.00646971	0.0778163	0.0401062	0	0	DCN1,_defective_in_cullin_neddylation_1,_domain_containing_5_(S._cerevisiae)
ENSG00000232112	0.405316	-0.0821649	0.0981941	0.292102	0.150548	0	0	coiled-coil_domain_containing_72
ENSG00000049323	0.405168	0.171152	0.0824046	0.267226	0.137727	0	0	latent_transforming_growth_factor_beta_binding_protein_1
ENSG00000205213	0.404964	0.099858	0.147603	0.362055	0.186601	0	0	leucine-rich_repeat_containing_G_protein-coupled_receptor_4
ENSG00000164045	0.404918	0.446735	0.0873222	0.27482	0.141641	0	0	cell_division_cycle_25_homolog_A_(S._pombe)
ENSG00000231043	0.404898	0.250849	0.104462	0.301478	0.155381	0	0	no_fct
ENSG00000189403	0.404687	0.0629296	0.0673802	0.239991	0.12369	0	0	high_mobility_group_box_1
ENSG00000105792	0.4045	-0.0457952	0.069193	0.2435	0.125499	0	0	chromosome_7_open_reading_frame_63
ENSG00000116560	0.404176	0.00749068	0.00684142	0.0796746	0.0410639	0	0	splicing_factor_proline/glutamine-rich
ENSG00000196616	0.403992	-1.00555	0.43399	0.644262	0.33205	0	0	alcohol_dehydrogenase_1B_(class_I),_beta_polypeptide
ENSG00000124226	0.403872	0.537772	0.0129541	0.106099	0.0546832	0	0	ring_finger_protein_114
ENSG00000182261	0.403091	-0.113421	0.429097	0.640508	0.330115	0	0	NLR_family,_pyrin_domain_containing_10
ENSG00000182329	0.402781	-0.422495	0.486356	0.686103	0.353614	0	0	Uncharacterized_protein
ENSG00000217239	0.402551	1.03352	0.513025	0.705421	0.363571	0	0	no_fct
ENSG00000240498	0.402361	0.133333	0.217622	0.441408	0.2275	0	0	no_fct
ENSG00000170396	0.401814	0.0226235	0.196325	0.419393	0.216154	0	0	zinc_finger_protein_804A
ENSG00000055208	0.401683	0.0934619	0.00846323	0.0866951	0.0446823	0	0	TGF-beta_activated_kinase_1/MAP3K7_binding_protein_2
ENSG00000127989	0.401202	0.0645194	0.0255116	0.1472	0.075866	0	0	mitochondrial_transcription_termination_factor
ENSG00000227304	0.401089	1.66167	0.692472	0.827949	0.426721	0	0	no_fct
ENSG00000242445	0.401036	-0.40209	0.558188	0.740434	0.381617	0	0	no_fct
ENSG00000170498	0.401009	0.303785	0.093798	0.28543	0.147109	0	0	KiSS-1_metastasis-suppressor
ENSG00000163611	0.400719	0.0391106	0.058	0.222821	0.114841	0	0	spindle_and_centriole_associated_protein_1
ENSG00000196290	0.399636	0.160972	0.0231641	0.140629	0.0724797	0	0	NIF3_NGG1_interacting_factor_3-like_1_(S._pombe)
ENSG00000221890	0.399624	0.0578228	0.0732363	0.251247	0.129492	0	0	neuronal_pentraxin_receptor
ENSG00000206538	0.399424	-0.137412	0.0270405	0.151242	0.0779493	0	0	vestigial_like_3_(Drosophila)
ENSG00000137338	0.399184	-0.0296412	0.129069	0.338372	0.174395	0	0	piggyBac_transposable_element_derived_1
ENSG00000152684	0.398786	0.246876	0.00208463	0.0480036	0.0247409	0	0	pelota_homolog_(Drosophila)
ENSG00000213492	0.398742	0.840625	0.226238	0.450943	0.232414	0	0	no_fct
ENSG00000131931	0.398706	0.046474	0.0231586	0.140629	0.0724797	0	0	THAP_domain_containing,_apoptosis_associated_protein_1
ENSG00000119965	0.398581	0.139733	0.0328288	0.165996	0.0855535	0	0	chromosome_10_open_reading_frame_88
ENSG00000162618	0.398553	0.283496	0.0506625	0.207041	0.106708	0	0	EGF,_latrophilin_and_seven_transmembrane_domain_containing_1
ENSG00000230091	0.39855	-0.181524	0.304648	0.530036	0.273178	0	0	no_fct
[truncated: 12,712 more rows]

## Sheet: Uninfected vs 6 hpi
ENSEMBL ID	log2Fold-change	AveExpr	P-value	Adj.P-value	Qval	Qvals.FC	Adjusted Pvals.FC	Annotation
ENSG00000216624	4.06026	2.40076	0.000264943	0.0156615	0.00835539	1	1	no_fct
ENSG00000079112	3.72955	3.32198	0.00139151	0.0288302	0.0153808	1	1	cadherin_17,_LI_cadherin_(liver-intestine)
ENSG00000213005	3.33789	1.24068	0.000211144	0.014551	0.00776295	1	1	no_fct
ENSG00000138135	3.26878	0.903374	5.65533e-08	0.000831899	0.000443816	1	1	cholesterol_25-hydroxylase
ENSG00000159212	3.19327	0.661508	1.85737e-06	0.0024838	0.0013251	1	1	chloride_intracellular_channel_6
ENSG00000130600	3.01881	0.202114	0.000268785	0.0156615	0.00835539	1	1	H19,_imprinted_maternally_expressed_transcript_(non-protein_coding)
ENSG00000169429	3.01705	0.78656	1.6352e-05	0.00601344	0.00320816	1	1	interleukin_8
ENSG00000232176	2.88912	1.52492	0.00449738	0.0508802	0.0271445	1	0	no_fct
ENSG00000243403	2.86948	3.60412	0.0121059	0.0832901	0.0444351	1	0	no_fct
ENSG00000236686	2.85945	1.66728	0.00124087	0.0274574	0.0146485	1	1	no_fct
ENSG00000161570	2.64968	3.26654	0.000364243	0.0172472	0.00920136	1	1	chemokine_(C-C_motif)_ligand_5
ENSG00000237176	2.61407	1.51108	0.00676432	0.0626594	0.0334287	1	0	no_fct
ENSG00000213452	2.58763	1.54803	0.00119186	0.02689	0.0143458	1	1	no_fct
ENSG00000244722	2.56263	3.82511	0.00450931	0.0509463	0.0271797	1	0	no_fct
ENSG00000121858	2.56031	3.50618	0.000648565	0.0204308	0.0108998	1	1	tumor_necrosis_factor_(ligand)_superfamily,_member_10
ENSG00000225886	2.51641	3.65994	1.76137e-06	0.0024838	0.0013251	1	1	no_fct
ENSG00000157766	2.48098	-0.722308	0.00236461	0.0380404	0.0202945	1	1	aggrecan
ENSG00000135114	2.45505	4.5412	6.27849e-06	0.00529469	0.0028247	1	1	2'-5'-oligoadenylate_synthetase-like
ENSG00000180138	2.43816	1.90657	0.00391375	0.0478166	0.0255101	1	1	casein_kinase_1,_alpha_1-like
ENSG00000136244	2.43789	0.956895	5.80213e-05	0.00917735	0.00489609	1	1	interleukin_6_(interferon,_beta_2)
ENSG00000134321	2.42838	5.3405	1.21939e-06	0.0024838	0.0013251	1	1	radical_S-adenosyl_methionine_domain_containing_2
ENSG00000119922	2.39377	3.5933	9.42861e-05	0.0103111	0.00550092	1	1	interferon-induced_protein_with_tetratricopeptide_repeats_2
ENSG00000169245	2.36526	2.43122	0.0056236	0.0574821	0.0306666	1	0	chemokine_(C-X-C_motif)_ligand_10
ENSG00000138646	2.27226	4.38633	4.93272e-05	0.00860012	0.00458814	1	1	hect_domain_and_RLD_5
ENSG00000240950	2.26171	1.45533	0.00955453	0.0730874	0.038992	1	0	no_fct
ENSG00000148677	2.23825	0.883514	7.5587e-06	0.00529469	0.0028247	1	1	ankyrin_repeat_domain_1_(cardiac_muscle)
ENSG00000108700	2.23173	0.98517	0.000250473	0.0155493	0.0082955	1	1	chemokine_(C-C_motif)_ligand_8
ENSG00000203721	2.18022	0.156395	6.87329e-06	0.00529469	0.0028247	1	1	chromosome_1_open_reading_frame_98
ENSG00000124875	2.14683	0.422151	2.92796e-05	0.00683655	0.00364728	1	1	chemokine_(C-X-C_motif)_ligand_6_(granulocyte_chemotactic_protein_2)
ENSG00000104951	2.13805	2.12593	4.20101e-05	0.00818126	0.00436468	1	1	interleukin_4_induced_1
ENSG00000133048	2.11509	-0.0623642	5.06675e-05	0.00860898	0.00459287	1	1	chitinase_3-like_1_(cartilage_glycoprotein-39)
ENSG00000163739	2.09435	0.949818	0.000257792	0.0155658	0.00830429	1	1	chemokine_(C-X-C_motif)_ligand_1_(melanoma_growth_stimulating_activity,_alpha)
ENSG00000157601	2.07203	4.20583	6.57672e-05	0.00964985	0.00514817	1	1	myxovirus_(influenza_virus)_resistance_1,_interferon-inducible_protein_p78_(mouse)
ENSG00000226971	2.06917	1.01665	0.00115903	0.0265508	0.0141648	1	1	no_fct
ENSG00000175084	2.05718	0.145828	7.14593e-05	0.00964985	0.00514817	1	1	desmin
ENSG00000161958	2.03891	0.497666	1.57895e-05	0.00601344	0.00320816	1	1	fibroblast_growth_factor_11
ENSG00000228328	2.02506	1.5268	0.00154342	0.030312	0.0161714	1	1	no_fct
ENSG00000253173	2.00077	1.56978	0.0119638	0.0827785	0.0441622	1	0	no_fct
ENSG00000248180	1.97791	1.36704	0.00628616	0.0604836	0.0322679	1	0	no_fct
ENSG00000111335	1.96995	4.31629	0.000733082	0.0213961	0.0114148	1	1	2'-5'-oligoadenylate_synthetase_2,_69/71kDa
ENSG00000240135	1.96523	1.53817	0.00139666	0.0288302	0.0153808	1	1	no_fct
ENSG00000215007	1.95636	2.48781	0.00228996	0.0373452	0.0199236	1	1	no_fct
ENSG00000111341	1.95361	-1.24663	1.4094e-05	0.00578573	0.00308667	1	1	matrix_Gla_protein
ENSG00000234036	1.95011	1.89168	0.0102578	0.0755395	0.0403002	1	0	no_fct
ENSG00000162433	1.92311	1.67879	0.000437526	0.0181696	0.00969344	1	1	adenylate_kinase_4
ENSG00000241478	1.90363	1.49318	0.00250636	0.0387096	0.0206515	1	1	no_fct
ENSG00000137959	1.89502	4.11513	0.000136136	0.0122107	0.00651438	1	1	interferon-induced_protein_44-like
ENSG00000250071	1.89155	1.10936	5.15092e-05	0.00861022	0.00459353	1	1	no_fct
ENSG00000230750	1.89053	1.10343	0.00769638	0.0667543	0.0356133	1	0	no_fct
ENSG00000145423	1.87788	-0.0653636	0.00609188	0.0599483	0.0319823	1	0	secreted_frizzled-related_protein_2
ENSG00000105664	1.86087	0.39867	0.00482134	0.0526517	0.0280896	1	0	cartilage_oligomeric_matrix_protein
ENSG00000134326	1.86057	4.33596	0.000195409	0.0145175	0.00774504	1	1	cytidine_monophosphate_(UMP-CMP)_kinase_2,_mitochondrial
ENSG00000152936	1.80754	0.172461	0.00642491	0.0609352	0.0325088	1	0	intermediate_filament_tail_domain_containing_1
ENSG00000142583	1.80515	1.2926	0.0039909	0.0481592	0.0256928	1	1	solute_carrier_family_2_(facilitated_glucose/fructose_transporter),_member_5
ENSG00000229268	1.79483	0.808215	0.00792122	0.0676597	0.0360963	1	0	no_fct
ENSG00000115163	1.76204	0.452865	0.000213666	0.014551	0.00776295	1	1	centromere_protein_A
ENSG00000107317	1.75308	0.548663	0.000843266	0.022619	0.0120672	1	1	prostaglandin_D2_synthase_21kDa_(brain)
ENSG00000204152	1.74546	-1.24136	0.0145883	0.0927247	0.0494684	1	0	translocase_of_inner_mitochondrial_membrane_23_homolog_B_(yeast)
ENSG00000162738	1.73957	-0.226699	0.000913306	0.0233848	0.0124757	1	1	vang-like_2_(van_gogh,_Drosophila)
ENSG00000232362	1.71895	1.66061	0.00956869	0.0731197	0.0390092	1	0	no_fct
ENSG00000183486	1.71791	3.7581	3.73763e-05	0.00785436	0.00419028	1	1	myxovirus_(influenza_virus)_resistance_2_(mouse)
ENSG00000247095	1.70056	0.697593	0.000189377	0.014445	0.00770636	1	1	no_fct
ENSG00000136167	1.6808	0.228111	0.000799468	0.0221575	0.011821	1	1	lymphocyte_cytosolic_protein_1_(L-plastin)
ENSG00000185745	1.67462	2.7823	0.000320026	0.0165439	0.00882613	1	1	interferon-induced_protein_with_tetratricopeptide_repeats_1
ENSG00000172183	1.66618	1.92508	0.000658329	0.0204758	0.0109238	1	1	interferon_stimulated_exonuclease_gene_20kDa
ENSG00000152253	1.6565	0.448655	0.000322822	0.0165439	0.00882613	1	1	SPC25,_NDC80_kinetochore_complex_component,_homolog_(S._cerevisiae)
ENSG00000125730	1.65533	-0.193922	0.00566944	0.057778	0.0308244	1	0	complement_component_3
ENSG00000175063	1.6509	0.794369	0.000255907	0.0155634	0.00830303	1	1	ubiquitin-conjugating_enzyme_E2C
ENSG00000130775	1.6484	2.70828	6.64812e-05	0.00964985	0.00514817	1	1	chromosome_1_open_reading_frame_38
ENSG00000123689	1.61273	0.141607	0.000329834	0.0165439	0.00882613	1	1	G0/G1switch_2
ENSG00000143228	1.61188	0.539212	0.00100137	0.0242645	0.012945	1	1	NUF2,_NDC80_kinetochore_complex_component,_homolog_(S._cerevisiae)
ENSG00000234332	1.60737	1.095	0.000391643	0.0175642	0.00937048	1	1	no_fct
ENSG00000007933	1.60719	-0.643519	8.6712e-05	0.0100824	0.00537894	1	1	flavin_containing_monooxygenase_3
ENSG00000006016	1.58777	0.493937	0.00670144	0.062273	0.0332225	1	0	cytokine_receptor-like_factor_1
ENSG00000143847	1.58632	0.804094	2.84938e-05	0.00676038	0.00360665	1	1	protein_tyrosine_phosphatase,_receptor_type,_f_polypeptide_(PTPRF),_interacting_protein_(liprin),_alpha_4
ENSG00000204637	1.58372	0.938528	0.00492536	0.0531861	0.0283747	1	0	no_fct
ENSG00000223825	1.56251	1.08515	0.00917942	0.0721428	0.038488	1	0	no_fct
ENSG00000153233	1.56006	0.502948	6.6625e-06	0.00529469	0.0028247	1	1	protein_tyrosine_phosphatase,_receptor_type,_R
ENSG00000133169	1.55836	0.283473	0.000894792	0.0231716	0.012362	1	1	brain_expressed,_X-linked_1
ENSG00000102802	1.55419	0.283239	0.000651647	0.0204308	0.0108998	1	1	chromosome_13_open_reading_frame_33
ENSG00000228318	1.55078	2.52684	0.0094705	0.0730142	0.0389529	1	0	no_fct
ENSG00000217239	1.55067	1.03352	0.0138682	0.0901001	0.0480682	1	0	no_fct
ENSG00000144834	1.54385	0.614231	0.00176598	0.0327816	0.0174889	1	1	transgelin_3
ENSG00000234362	1.51855	1.43684	0.0011542	0.0265508	0.0141648	1	1	no_fct
ENSG00000213942	1.516	1.26525	0.00489322	0.0530218	0.028287	1	0	no_fct
ENSG00000228847	1.51119	1.11276	0.00639599	0.0608178	0.0324461	1	0	no_fct
ENSG00000227619	1.50503	-0.141256	0.00420326	0.0491535	0.0262233	1	1	no_fct
ENSG00000123610	1.49549	1.2259	0.00144552	0.0291282	0.0155399	1	1	tumor_necrosis_factor,_alpha-induced_protein_6
ENSG00000138792	1.48542	1.01667	0.000609375	0.0201823	0.0107672	1	1	glutamyl_aminopeptidase_(aminopeptidase_A)
ENSG00000173262	1.47403	1.57865	0.00956176	0.0731047	0.0390012	1	0	solute_carrier_family_2_(facilitated_glucose_transporter),_member_14
ENSG00000134198	1.47004	0.311261	0.000719221	0.0212445	0.0113339	1	1	tetraspanin_2
ENSG00000143502	1.45597	0.721988	0.00449705	0.0508802	0.0271445	1	0	sushi_domain_containing_4
ENSG00000023445	1.44969	0.902465	0.000263193	0.0156615	0.00835539	1	1	baculoviral_IAP_repeat_containing_3
ENSG00000226935	1.43503	-0.0570209	0.00134954	0.0284907	0.0151997	1	1	no_fct
ENSG00000145526	1.43237	0.010674	0.00377127	0.0470586	0.0251057	1	1	cadherin_18,_type_2
ENSG00000134690	1.43208	0.389076	4.29696e-05	0.00820887	0.00437941	1	1	cell_division_cycle_associated_8
ENSG00000235275	1.42223	0.0660569	0.00180882	0.0331355	0.0176777	1	1	no_fct
ENSG00000120217	1.41971	1.42082	0.00241697	0.0381684	0.0203628	1	1	CD274_molecule
ENSG00000140285	1.41908	-0.115301	2.4139e-05	0.00622957	0.00332346	1	1	fibroblast_growth_factor_7
ENSG00000171241	1.41165	0.571794	0.000325807	0.0165439	0.00882613	1	1	SHC_SH2-domain_binding_protein_1
ENSG00000114115	1.40892	0.951044	0.000641492	0.0204308	0.0108998	1	1	retinol_binding_protein_1,_cellular
ENSG00000119514	1.40717	0.507676	9.79142e-07	0.0024838	0.0013251	1	1	UDP-N-acetyl-alpha-D-galactosamine:polypeptide_N-acetylgalactosaminyltransferase_12_(GalNAc-T12)
ENSG00000179750	1.4066	0.600629	0.00010769	0.0107035	0.00571029	1	1	apolipoprotein_B_mRNA_editing_enzyme,_catalytic_polypeptide-like_3B
ENSG00000165490	1.40052	0.502672	0.00021321	0.014551	0.00776295	1	1	chromosome_11_open_reading_frame_82
ENSG00000248546	1.40018	0.877548	0.00293017	0.0416253	0.022207	1	1	acidic_(leucine-rich)_nuclear_phosphoprotein_32_family,_member_C
ENSG00000256356	1.39556	1.33005	0.0066187	0.0619345	0.0330419	1	0	no_fct
ENSG00000101447	1.39334	0.407708	4.22689e-05	0.00818126	0.00436468	1	1	family_with_sequence_similarity_83,_member_D
ENSG00000049540	1.38943	-0.135693	0.00225767	0.0371428	0.0198156	1	1	elastin
ENSG00000024526	1.38837	0.391645	0.000953657	0.0236943	0.0126409	1	1	DEP_domain_containing_1
ENSG00000156970	1.37808	0.499316	0.00045913	0.0184683	0.00985282	1	1	budding_uninhibited_by_benzimidazoles_1_homolog_beta_(yeast)
ENSG00000183426	1.37711	-0.433741	0.00689984	0.0633999	0.0338237	1	0	nuclear_pore_complex_interacting_protein
ENSG00000072571	1.36935	0.294581	0.00140989	0.0288868	0.0154111	1	1	hyaluronan-mediated_motility_receptor_(RHAMM)
ENSG00000087586	1.36621	0.368204	2.1589e-05	0.00619444	0.00330472	1	1	aurora_kinase_A
ENSG00000132329	1.3662	0.350407	0.00263471	0.039588	0.0211201	1	1	receptor_(G_protein-coupled)_activity_modifying_protein_1
ENSG00000099998	1.36433	-0.196359	0.00130534	0.0281135	0.0149985	1	1	gamma-glutamyltransferase_5
ENSG00000119917	1.36206	2.80145	9.03347e-05	0.0102217	0.00545327	1	1	interferon-induced_protein_with_tetratricopeptide_repeats_3
ENSG00000168961	1.36137	2.33614	0.000111358	0.0108174	0.00577103	1	1	lectin,_galactoside-binding,_soluble,_9
ENSG00000237240	1.35958	0.168644	0.000112443	0.0108174	0.00577103	1	1	no_fct
ENSG00000112984	1.35936	0.270085	0.000944452	0.0236756	0.0126309	1	1	kinesin_family_member_20A
ENSG00000233929	1.35933	0.177386	0.00487864	0.0529239	0.0282348	1	0	no_fct
ENSG00000134057	1.35768	0.555799	0.000436584	0.0181696	0.00969344	1	1	cyclin_B1
ENSG00000128342	1.35684	0.809382	1.44747e-05	0.00578573	0.00308667	1	1	leukemia_inhibitory_factor_(cholinergic_differentiation_factor)
ENSG00000138944	1.35532	0.887979	0.000691038	0.020916	0.0111586	1	1	KIAA1644
ENSG00000196684	1.3503	0.890584	0.00051869	0.0192675	0.0102792	1	1	hematopoietic_SH2_domain_containing
ENSG00000135451	1.34811	0.460004	0.000284763	0.0160604	0.00856821	1	1	trophinin_associated_protein_(tastin)
ENSG00000075218	1.34682	0.505607	0.000307561	0.0164517	0.00877696	1	1	G-2_and_S-phase_expressed_1
ENSG00000175899	1.34544	-0.578711	1.43083e-05	0.00578573	0.00308667	1	1	alpha-2-macroglobulin
ENSG00000162645	1.34315	0.674294	2.10968e-05	0.00619444	0.00330472	1	1	guanylate_binding_protein_2,_interferon-inducible
ENSG00000111331	1.34173	2.95188	0.000565786	0.019816	0.0105718	1	1	2'-5'-oligoadenylate_synthetase_3,_100kDa
ENSG00000112742	1.33683	0.583061	0.0047557	0.0522632	0.0278823	1	0	TTK_protein_kinase
ENSG00000236229	1.33046	0.97074	0.000528154	0.019377	0.0103376	1	1	no_fct
ENSG00000178999	1.32989	0.592458	7.22563e-05	0.00964985	0.00514817	1	1	aurora_kinase_B
ENSG00000108691	1.32957	0.657852	2.14396e-05	0.00619444	0.00330472	1	1	chemokine_(C-C_motif)_ligand_2
ENSG00000118193	1.32835	0.410693	0.00398659	0.0481592	0.0256928	1	1	kinesin_family_member_14
ENSG00000163017	1.32183	0.175594	7.88625e-05	0.00966723	0.00515745	1	1	actin,_gamma_2,_smooth_muscle,_enteric
ENSG00000179300	1.32175	-0.0646238	0.00132105	0.0282452	0.0150687	1	1	zinc_finger,_CCHC_domain_containing_5
ENSG00000111247	1.32137	0.58187	0.000952975	0.0236943	0.0126409	1	1	RAD51_associated_protein_1
ENSG00000090339	1.32041	0.1096	2.41319e-05	0.00622957	0.00332346	1	1	intercellular_adhesion_molecule_1
ENSG00000121152	1.31732	0.554316	0.0004603	0.0184683	0.00985282	1	1	non-SMC_condensin_I_complex,_subunit_H
ENSG00000123485	1.31347	0.416959	0.000290555	0.016163	0.00862291	1	1	Holliday_junction_recognition_protein
ENSG00000226666	1.31251	1.2611	0.0117171	0.0817252	0.0436002	1	0	no_fct
ENSG00000254838	1.31075	-0.0196117	0.00206363	0.0353902	0.0188806	1	1	GTPase,_very_large_interferon_inducible_pseudogene_1
ENSG00000214872	1.31058	1.6952	5.60511e-05	0.00901292	0.00480837	1	1	smoothelin-like_1
ENSG00000158402	1.3078	0.492504	0.000694426	0.0209414	0.0111722	1	1	cell_division_cycle_25_homolog_C_(S._pombe)
ENSG00000117228	1.30448	1.37334	0.00185515	0.0336092	0.0179304	1	1	guanylate_binding_protein_1,_interferon-inducible
ENSG00000008517	1.30372	0.0318102	7.11901e-05	0.00964985	0.00514817	1	1	interleukin_32
ENSG00000135744	1.30294	-0.154935	0.0094294	0.0729311	0.0389086	1	0	angiotensinogen_(serpin_peptidase_inhibitor,_clade_A,_member_8)
ENSG00000126787	1.2992	0.369928	0.0012927	0.0279231	0.0148969	1	1	discs,_large_(Drosophila)_homolog-associated_protein_5
ENSG00000184661	1.29703	0.31181	0.000334707	0.0166336	0.00887399	1	1	cell_division_cycle_associated_2
ENSG00000186185	1.28511	0.392964	0.000238717	0.0151416	0.00807802	1	1	kinesin_family_member_18B
ENSG00000233786	1.2845	0.878554	0.00788659	0.0676274	0.0360791	1	0	no_fct
ENSG00000169679	1.28274	0.594626	0.000626354	0.0204008	0.0108838	1	1	budding_uninhibited_by_benzimidazoles_1_homolog_(yeast)
ENSG00000230832	1.28187	0.960475	0.00359863	0.0457131	0.0243878	1	1	no_fct
ENSG00000232769	1.28117	0.512277	0.000550126	0.0197257	0.0105236	1	1	Uncharacterized_protein
ENSG00000138180	1.28002	0.382735	0.000665074	0.0205511	0.010964	1	1	centrosomal_protein_55kDa
ENSG00000133136	1.27952	1.33585	0.0114615	0.0807537	0.0430819	1	0	no_fct
ENSG00000129195	1.27636	0.422286	0.000637252	0.0204308	0.0108998	1	1	family_with_sequence_similarity_64,_member_A
ENSG00000131203	1.27373	3.54578	0.0095053	0.073046	0.0389699	1	0	indoleamine_2,3-dioxygenase_1
ENSG00000213500	1.27062	2.484	0.0113256	0.0803274	0.0428545	1	0	no_fct
ENSG00000089127	1.26048	5.41126	0.0123892	0.0842166	0.0449294	1	0	2'-5'-oligoadenylate_synthetase_1,_40/46kDa
ENSG00000204397	1.25986	0.914018	0.000753522	0.0216345	0.011542	1	1	caspase_recruitment_domain_family,_member_16
ENSG00000041982	1.25943	0.32045	2.2756e-05	0.00619444	0.00330472	1	1	tenascin_C
ENSG00000166851	1.25843	0.448424	0.00035743	0.0171203	0.00913364	1	1	polo-like_kinase_1
ENSG00000124134	1.25705	0.452332	0.000696333	0.020947	0.0111752	1	1	potassium_voltage-gated_channel,_delayed-rectifier,_subfamily_S,_member_1
ENSG00000237649	1.25652	0.600656	0.000365815	0.0172472	0.00920136	1	1	kinesin_family_member_C1
ENSG00000240764	1.25506	0.0613929	0.00139599	0.0288302	0.0153808	1	1	protocadherin_gamma_subfamily_C,_5
ENSG00000089685	1.25097	0.312464	8.51732e-05	0.0100824	0.00537894	1	1	baculoviral_IAP_repeat_containing_5
ENSG00000142945	1.25008	0.61307	0.00116937	0.0266276	0.0142058	1	1	kinesin_family_member_2C
ENSG00000149968	1.24983	0.0397012	4.49947e-05	0.00848555	0.00452702	1	1	matrix_metallopeptidase_3_(stromelysin_1,_progelatinase)
ENSG00000236937	1.24867	0.884956	0.00343503	0.0450122	0.0240139	1	1	no_fct
ENSG00000154839	1.24748	0.529979	0.000377588	0.017289	0.00922362	1	1	spindle_and_kinetochore_associated_complex_subunit_1
ENSG00000168334	1.24737	0.579939	0.00400494	0.0482891	0.0257621	1	1	xin_actin-binding_repeat_containing_1
ENSG00000221887	1.24464	0.0438617	0.000293765	0.0161644	0.00862365	1	1	histocompatibility_(minor)_serpin_domain_containing
ENSG00000115267	1.24084	2.65687	0.00123411	0.0274574	0.0146485	1	1	interferon_induced_with_helicase_C_domain_1
ENSG00000232004	1.23974	1.11206	0.0115411	0.0809812	0.0432033	1	0	no_fct
ENSG00000168078	1.23959	0.431144	0.00287341	0.041248	0.0220057	1	1	PDZ_binding_kinase
ENSG00000183578	1.23836	0.972501	0.0137244	0.0896303	0.0478176	1	0	tumor_necrosis_factor,_alpha-induced_protein_8-like_3
ENSG00000076382	1.23809	0.549077	0.000687775	0.0209039	0.0111522	1	1	sperm_associated_antigen_5
ENSG00000162595	1.23166	0.470241	0.00149501	0.0298393	0.0159192	1	1	DIRAS_family,_GTP-binding_RAS-like_3
ENSG00000197632	1.22828	0.516058	0.00958932	0.0732393	0.039073	1	0	serpin_peptidase_inhibitor,_clade_B_(ovalbumin),_member_2
ENSG00000169715	1.22614	0.315005	2.63104e-06	0.00297712	0.00158829	1	1	metallothionein_1E
ENSG00000113070	1.22468	0.889115	0.00517996	0.0547001	0.0291824	1	0	heparin-binding_EGF-like_growth_factor
ENSG00000111665	1.22359	0.188578	2.24002e-05	0.00619444	0.00330472	1	1	cell_division_cycle_associated_3
ENSG00000080986	1.22344	0.520926	0.000416626	0.0179723	0.0095882	1	1	NDC80_homolog,_kinetochore_complex_component_(S._cerevisiae)
ENSG00000117650	1.2189	0.43004	0.00147266	0.0294333	0.0157026	1	1	NIMA_(never_in_mitosis_gene_a)-related_kinase_2
ENSG00000168389	1.21841	1.17519	1.00123e-05	0.00566468	0.00302209	1	1	major_facilitator_superfamily_domain_containing_2A
ENSG00000236654	1.21629	0.25324	0.00324026	0.0437642	0.0233481	1	1	no_fct
ENSG00000090889	1.21168	0.346816	0.00858858	0.0695929	0.0371277	1	0	kinesin_family_member_4A
ENSG00000167550	1.21052	1.13113	0.00139741	0.0288302	0.0153808	1	1	Ras_homolog_enriched_in_brain_like_1
ENSG00000123975	1.2082	0.510077	0.00028673	0.0160984	0.00858848	1	1	CDC28_protein_kinase_regulatory_subunit_2
ENSG00000137496	1.20104	0.891526	5.93164e-05	0.00918468	0.0049	1	1	interleukin_18_binding_protein
ENSG00000226781	1.19863	1.39319	0.00658921	0.0618925	0.0330195	1	0	no_fct
ENSG00000218676	1.19815	0.243854	0.000784389	0.0220198	0.0117475	1	1	no_fct
ENSG00000183856	1.1963	0.385358	0.00071044	0.021155	0.0112861	1	1	IQ_motif_containing_GTPase_activating_protein_3
ENSG00000148773	1.19523	0.326687	0.000779844	0.021934	0.0117018	1	1	antigen_identified_by_monoclonal_antibody_Ki-67
ENSG00000224596	1.19181	-0.0395572	0.00323984	0.0437642	0.0233481	1	1	no_fct
ENSG00000074410	1.18525	0.117752	0.00056929	0.0198913	0.010612	1	1	carbonic_anhydrase_XII
ENSG00000093009	1.17284	0.466305	4.82247e-05	0.00860012	0.00458814	1	1	cell_division_cycle_45_homolog_(S._cerevisiae)
ENSG00000165480	1.17167	0.532967	0.00928529	0.0724597	0.0386571	1	0	spindle_and_kinetochore_associated_complex_subunit_3
ENSG00000136492	1.17079	1.16596	0.00631659	0.0604836	0.0322679	1	0	BRCA1_interacting_protein_C-terminal_helicase_1
ENSG00000185862	1.16297	-0.0453114	0.000382768	0.0173781	0.0092712	1	1	ecotropic_viral_integration_site_2B
ENSG00000145386	1.16197	0.370456	0.00386411	0.0475738	0.0253805	1	1	cyclin_A2
ENSG00000108370	1.16036	0.0647629	0.000230076	0.0149093	0.0079541	1	1	regulator_of_G-protein_signaling_9
ENSG00000232926	1.15993	0.0608998	3.33766e-05	0.00732792	0.00390943	1	1	no_fct
ENSG00000118526	1.15921	0.218981	0.00431997	0.0497236	0.0265274	1	1	transcription_factor_21
ENSG00000025708	1.15908	1.40859	0.000130802	0.0119509	0.0063758	1	1	thymidine_phosphorylase
ENSG00000239455	1.15809	0.596019	0.00321157	0.0437428	0.0233367	1	1	no_fct
ENSG00000169908	1.1544	0.562707	0.000431825	0.0181696	0.00969344	1	1	transmembrane_4_L_six_family_member_1
ENSG00000243649	1.15151	0.920727	0.00314129	0.0431854	0.0230393	1	1	complement_factor_B
ENSG00000107201	1.14796	2.65111	0.00195888	0.0344743	0.018392	1	1	DEAD_(Asp-Glu-Ala-Asp)_box_polypeptide_58
ENSG00000071539	1.14601	0.461205	0.000277578	0.0158928	0.00847877	1	1	thyroid_hormone_receptor_interactor_13
ENSG00000168685	1.14566	0.107037	0.000371384	0.017289	0.00922362	1	1	interleukin_7_receptor
ENSG00000137804	1.14507	0.333687	0.00162303	0.0313318	0.0167155	1	1	nucleolar_and_spindle_associated_protein_1
ENSG00000081059	1.14307	-0.112312	6.98012e-05	0.00964985	0.00514817	1	1	transcription_factor_7_(T-cell_specific,_HMG-box)
ENSG00000220412	1.14108	0.0861678	0.0114889	0.0808835	0.0431512	1	0	no_fct
ENSG00000116194	1.13875	1.99671	0.00515788	0.0546134	0.0291361	1	0	angiopoietin-like_1
ENSG00000105011	1.13856	0.402015	0.00037587	0.017289	0.00922362	1	1	ASF1_anti-silencing_function_1_homolog_B_(S._cerevisiae)
ENSG00000091651	1.13827	0.859218	0.00181987	0.0332138	0.0177195	1	1	origin_recognition_complex,_subunit_6
ENSG00000254510	1.13772	0.472653	0.000746092	0.0216044	0.0115259	1	1	no_fct
ENSG00000170312	1.1368	0.573036	0.00349942	0.045274	0.0241536	1	1	cyclin-dependent_kinase_1
ENSG00000117399	1.13374	0.336618	0.00187683	0.0337508	0.018006	1	1	cell_division_cycle_20_homolog_(S._cerevisiae)
ENSG00000146670	1.13363	0.552912	0.000229325	0.0149093	0.0079541	1	1	cell_division_cycle_associated_5
ENSG00000250321	1.13308	0.749009	0.00932008	0.0726049	0.0387345	1	0	no_fct
ENSG00000232110	1.1318	0.25534	0.00118603	0.02689	0.0143458	1	1	no_fct
ENSG00000222032	1.12906	0.40702	3.95023e-05	0.00795999	0.00424664	1	1	no_fct
ENSG00000035499	1.12783	0.456123	0.00315926	0.0433514	0.0231279	1	1	DEP_domain_containing_1B
ENSG00000203739	1.12696	-0.081823	0.000539013	0.0196259	0.0104704	1	1	no_fct
ENSG00000162063	1.1238	0.143098	0.000149445	0.0130079	0.0069397	1	1	cyclin_F
ENSG00000213689	1.12232	1.38571	1.39276e-06	0.0024838	0.0013251	1	1	three_prime_repair_exonuclease_1
ENSG00000131747	1.12083	0.396749	0.00295909	0.0418139	0.0223076	1	1	topoisomerase_(DNA)_II_alpha_170kDa
ENSG00000234964	1.11988	0.641012	0.00398439	0.0481592	0.0256928	1	1	fatty_acid_binding_protein_5_pseudogene_7
ENSG00000132321	1.11711	-0.322798	0.000557845	0.0197257	0.0105236	1	1	IQ_motif_containing_with_AAA_domain_1
ENSG00000154920	1.11342	0.38984	0.00219513	0.0366529	0.0195542	1	1	essential_meiotic_endonuclease_1_homolog_1_(S._pombe)
ENSG00000216657	1.10987	0.689158	0.00894218	0.0712179	0.0379946	1	0	no_fct
ENSG00000100739	1.10803	0.227482	0.000318838	0.0165439	0.00882613	1	1	bradykinin_receptor_B1
ENSG00000105538	1.10731	0.412634	0.00478946	0.0524594	0.0279869	1	0	Ras_interacting_protein_1
ENSG00000170961	1.10552	0.810385	0.000435234	0.0181696	0.00969344	1	1	hyaluronan_synthase_2
ENSG00000132639	1.10137	0.687135	0.00355481	0.0455103	0.0242796	1	1	synaptosomal-associated_protein,_25kDa
ENSG00000138347	1.09268	-0.20322	4.81927e-05	0.00860012	0.00458814	1	1	myopalladin
ENSG00000242221	1.08983	-0.535265	0.0103251	0.0758487	0.0404651	1	0	pregnancy_specific_beta-1-glycoprotein_2
ENSG00000236105	1.08947	1.48966	0.0137334	0.0896303	0.0478176	1	0	no_fct
ENSG00000164109	1.08789	0.63882	0.000860035	0.022713	0.0121173	1	1	MAD2_mitotic_arrest_deficient-like_1_(yeast)
ENSG00000101096	1.08678	0.601794	0.00830421	0.0687111	0.0366572	1	0	nuclear_factor_of_activated_T-cells,_cytoplasmic,_calcineurin-dependent_2
ENSG00000214110	1.08416	0.658526	0.00152287	0.0301095	0.0160633	1	1	no_fct
ENSG00000105889	1.08301	0.350078	4.94535e-05	0.00860012	0.00458814	1	1	STEAP_family_member_1B
ENSG00000127564	1.08066	0.452575	0.000379407	0.017289	0.00922362	1	1	protein_kinase,_membrane_associated_tyrosine/threonine_1
ENSG00000185480	1.07671	0.0907843	0.000267811	0.0156615	0.00835539	1	1	chromosome_12_open_reading_frame_48
ENSG00000120708	1.07533	0.482814	0.00239919	0.0381684	0.0203628	1	1	transforming_growth_factor,_beta-induced,_68kDa
ENSG00000163376	1.07514	0.917588	0.000178395	0.01418	0.00756502	1	1	kelch_repeat_and_BTB_(POZ)_domain_containing_8
ENSG00000228196	1.07488	0.450073	0.000615053	0.0202403	0.0107982	1	1	no_fct
ENSG00000196503	1.07394	0.831301	0.00525573	0.0551796	0.0294382	1	0	ADP-ribosylation_factor-like_9
ENSG00000169851	1.07239	0.173336	0.00262786	0.039588	0.0211201	1	1	protocadherin_7
ENSG00000182836	1.07228	0.305955	0.00143466	0.0290565	0.0155016	1	1	phosphatidylinositol-specific_phospholipase_C,_X_domain_containing_3
ENSG00000254545	1.06783	0.258645	0.0060919	0.0599483	0.0319823	1	0	no_fct
ENSG00000198959	1.06593	0.0394913	4.96616e-06	0.00521801	0.0027838	1	1	transglutaminase_2_(C_polypeptide,_protein-glutamine-gamma-glutamyltransferase)
ENSG00000213492	1.06277	0.840625	0.0029316	0.0416253	0.022207	1	1	no_fct
ENSG00000125965	1.06116	-0.148446	0.00440281	0.0501695	0.0267653	1	0	growth_differentiation_factor_5
ENSG00000205790	1.06065	0.165229	0.00415862	0.0490525	0.0261694	1	1	Uncharacterized_proteincDNA_FLJ44107_fis,_clone_TESTI4044296
ENSG00000141448	1.05831	0.240642	0.000723467	0.0213271	0.0113779	1	1	GATA_binding_protein_6
ENSG00000231290	1.05791	0.536105	0.00058152	0.0199167	0.0106255	1	1	no_fct
ENSG00000101057	1.05746	0.446529	0.000821238	0.0223711	0.0119349	1	1	v-myb_myeloblastosis_viral_oncogene_homolog_(avian)-like_2
ENSG00000234290	1.05554	0.706638	0.00336892	0.0447263	0.0238614	1	1	no_fct
ENSG00000230417	1.05296	0.54027	0.000658399	0.0204758	0.0109238	1	1	no_fct
ENSG00000114268	1.0513	0.752078	8.49882e-05	0.0100824	0.00537894	1	1	6-phosphofructo-2-kinase/fructose-2,6-biphosphatase_4
ENSG00000135476	1.05021	0.346201	0.000776466	0.0218809	0.0116734	1	1	extra_spindle_pole_bodies_homolog_1_(S._cerevisiae)
ENSG00000113209	1.04986	-0.22952	0.00024825	0.0155394	0.00829023	1	1	protocadherin_beta_5
ENSG00000051341	1.04899	0.627529	0.00220017	0.0366529	0.0195542	1	1	polymerase_(DNA_directed),_theta
ENSG00000130176	1.04732	0.152915	2.76648e-05	0.00669418	0.00357133	1	1	calponin_1,_basic,_smooth_muscle
ENSG00000240747	1.04237	0.31678	0.000400309	0.0177366	0.00946242	1	1	KRAB_box_domain_containing_1
ENSG00000109805	1.04202	0.43517	0.00356463	0.0455567	0.0243044	1	1	non-SMC_condensin_I_complex,_subunit_G
ENSG00000163735	1.04026	0.376415	3.09677e-05	0.00700824	0.00373888	1	1	chemokine_(C-X-C_motif)_ligand_5
ENSG00000165272	1.03997	0.452325	0.00910056	0.0719341	0.0383767	1	0	aquaporin_3_(Gill_blood_group)
ENSG00000068079	1.03938	1.64964	0.000415927	0.0179723	0.0095882	1	1	interferon-induced_protein_35
ENSG00000134769	1.03833	0.381289	1.908e-05	0.00619444	0.00330472	1	1	dystrobrevin,_alpha
ENSG00000176170	1.03668	0.500594	0.00124379	0.0274574	0.0146485	1	1	sphingosine_kinase_1
ENSG00000105559	1.03301	1.16693	0.000908188	0.0233641	0.0124647	1	1	pleckstrin_homology_domain_containing,_family_A_(phosphoinositide_binding_specific)_member_4
ENSG00000148848	1.02491	0.12389	1.82008e-06	0.0024838	0.0013251	1	1	ADAM_metallopeptidase_domain_12
ENSG00000173641	1.0225	-0.199379	9.61229e-05	0.0103111	0.00550092	1	1	heat_shock_27kDa_protein_family,_member_7_(cardiovascular)
ENSG00000256268	1.02187	0.226419	3.53041e-05	0.00752642	0.00401533	1	1	no_fct
ENSG00000187608	1.02032	2.83189	0.0117612	0.0819355	0.0437124	1	0	ISG15_ubiquitin-like_modifier
ENSG00000163808	1.01838	0.254665	0.0065365	0.0615964	0.0328615	1	0	kinesin_family_member_15
ENSG00000231549	1.01718	0.747081	0.00769807	0.0667543	0.0356133	1	0	no_fct
ENSG00000119686	1.01407	0.0164335	0.00340946	0.0448998	0.023954	1	1	Feline_leukemia_virus_subgroup_C_receptor-related_protein_2
ENSG00000133107	1.01366	0.114286	0.000121225	0.0112862	0.00602118	1	1	transient_receptor_potential_cation_channel,_subfamily_C,_member_4
ENSG00000224126	1.01208	0.526811	0.00625822	0.0604058	0.0322263	1	0	no_fct
ENSG00000167105	1.01066	0.132736	1.40698e-06	0.0024838	0.0013251	1	1	transmembrane_protein_92
ENSG00000130589	1.00903	2.10613	0.00352637	0.0453778	0.0242089	1	1	Peroxisomal_proliferator-activated_receptor_A-interacting_complex_285_kDa_protein
ENSG00000134222	1.00816	0.229359	0.000192469	0.014445	0.00770636	1	1	proline/serine-rich_coiled-coil_1
ENSG00000164122	1.00411	0.439357	0.00409742	0.0487794	0.0260237	1	1	ankyrin_repeat_and_SOCS_box_containing_5
ENSG00000168280	1.00371	1.05767	0.0142581	0.0913888	0.0487557	1	0	kinesin_family_member_5C
ENSG00000166897	-1.00054	-0.350058	7.30529e-05	0.00964985	0.00514817	1	1	extracellular_leucine-rich_repeat_and_fibronectin_type_III_domain_containing_2
ENSG00000125378	-1.00118	-0.253294	0.00389161	0.0477047	0.0254503	1	1	bone_morphogenetic_protein_4
ENSG00000141449	-1.00125	-0.419923	0.00047599	0.0185949	0.00992032	1	1	growth_regulation_by_estrogen_in_breast_cancer-like
ENSG00000173535	-1.00304	-0.192688	0.00159313	0.0310809	0.0165816	1	1	tumor_necrosis_factor_receptor_superfamily,_member_10c,_decoy_without_an_intracellular_domain
ENSG00000168970	-1.00448	-0.42626	0.0141701	0.0909832	0.0485393	1	0	JMJD7-PLA2G4B_readthrough
ENSG00000197361	-1.00671	-0.767663	0.000949443	0.0236756	0.0126309	1	1	F-box_and_leucine-rich_repeat_protein_22
ENSG00000128606	-1.01127	-0.0146776	0.000835868	0.0225194	0.0120141	1	1	leucine_rich_repeat_containing_17
ENSG00000153094	-1.01609	-0.0953806	0.00049328	0.018757	0.0100068	1	1	BCL2-like_11_(apoptosis_facilitator)
ENSG00000215790	-1.0163	-0.371596	0.000426357	0.0181696	0.00969344	1	1	solute_carrier_family_35,_member_E2
ENSG00000149809	-1.01803	0.0908726	0.000228425	0.0149093	0.0079541	1	1	transmembrane_7_superfamily_member_2
ENSG00000174428	-1.01824	-0.432131	0.00206076	0.0353902	0.0188806	1	1	GTF2I_repeat_domain_containing_2B
ENSG00000196275	-1.02025	-0.404439	0.000766911	0.0218019	0.0116312	1	1	GTF2I_repeat_domain_containing_2
ENSG00000254428	-1.02066	-0.294399	0.00167073	0.031876	0.0170058	1	1	no_fct
ENSG00000120693	-1.02156	-0.517677	0.00434989	0.0498856	0.0266138	1	1	SMAD_family_member_9
ENSG00000175879	-1.02173	-0.53334	0.00327294	0.0440888	0.0235213	1	1	homeobox_D8
ENSG00000232450	-1.02615	-0.038671	0.000852809	0.022713	0.0121173	1	1	no_fct
ENSG00000224086	-1.02626	-0.443834	0.0022451	0.0371428	0.0198156	1	1	no_fct
ENSG00000116117	-1.02667	-0.436316	0.000714716	0.0212059	0.0113133	1	1	par-3_partitioning_defective_3_homolog_B_(C._elegans)
ENSG00000230383	-1.02856	-0.727359	0.0103476	0.0758496	0.0404656	1	0	no_fct
ENSG00000174963	-1.03008	-0.683528	0.00962688	0.0732978	0.0391042	1	0	Zic_family_member_4
ENSG00000152527	-1.03561	-0.164941	0.00284975	0.0410576	0.0219041	1	1	pleckstrin_homology_domain_containing,_family_H_(with_MyTH4_domain)_member_2
ENSG00000231113	-1.03694	-0.167554	0.00643159	0.0609592	0.0325216	1	0	no_fct
ENSG00000188004	-1.04637	-0.386775	0.00197722	0.0346073	0.0184629	1	1	chromosome_1_open_reading_frame_204
ENSG00000176971	-1.04774	-0.465254	0.000324192	0.0165439	0.00882613	1	1	fin_bud_initiation_factor_homolog_(zebrafish)
ENSG00000168702	-1.0495	-0.328167	0.000358467	0.0171203	0.00913364	1	1	low_density_lipoprotein_receptor-related_protein_1B
ENSG00000159388	-1.05476	-0.4147	2.77597e-05	0.00669418	0.00357133	1	1	BTG_family,_member_2
ENSG00000114541	-1.05645	0.600654	0.00855389	0.0695929	0.0371277	1	0	FERM_domain_containing_4B
ENSG00000077943	-1.0566	-0.669805	0.00420409	0.0491535	0.0262233	1	1	integrin,_alpha_8
ENSG00000153162	-1.05998	0.105702	8.89563e-05	0.0102217	0.00545327	1	1	bone_morphogenetic_protein_6
ENSG00000188825	-1.06203	-0.650195	0.000646165	0.0204308	0.0108998	1	1	no_fct
ENSG00000159871	-1.06443	0.255427	0.00106821	0.0253033	0.0134992	1	1	LY6/PLAUR_domain_containing_5
ENSG00000153291	-1.06443	-0.497062	0.000896304	0.0231716	0.012362	1	1	solute_carrier_family_25,_member_27
ENSG00000105519	-1.0648	-0.565403	0.000325451	0.0165439	0.00882613	1	1	calcyphosine
ENSG00000215099	-1.07256	-0.399967	0.000506021	0.0189887	0.0101304	1	1	Uncharacterized_protein
ENSG00000169184	-1.07396	-0.291104	0.000452718	0.0184409	0.00983819	1	1	meningioma_(disrupted_in_balanced_translocation)_1
ENSG00000254535	-1.07773	-0.249013	0.000330653	0.0165439	0.00882613	1	1	poly(A)_binding_protein,_cytoplasmic_4-like
ENSG00000163364	-1.07981	-0.203419	0.000207926	0.014551	0.00776295	1	1	no_fct
ENSG00000205041	-1.08498	-0.545825	0.00140997	0.0288868	0.0154111	1	1	NINP6167Uncharacterized_protein
ENSG00000186496	-1.08525	-0.620882	0.00136362	0.0285738	0.0152441	1	1	zinc_finger_protein_396
ENSG00000230953	-1.0855	-0.3724	0.00864506	0.0697963	0.0372362	1	0	no_fct
ENSG00000160801	-1.08693	0.105763	1.72688e-06	0.0024838	0.0013251	1	1	parathyroid_hormone_1_receptor
ENSG00000167992	-1.09079	0.184753	0.00109167	0.0256524	0.0136855	1	1	von_Willebrand_factor_C_and_EGF_domains
ENSG00000227087	-1.09858	0.141022	0.00471916	0.0520668	0.0277775	1	0	no_fct
ENSG00000178184	-1.11716	-0.240985	1.68957e-06	0.0024838	0.0013251	1	1	par-6_partitioning_defective_6_homolog_gamma_(C._elegans)
ENSG00000213904	-1.11856	-0.818551	0.00912589	0.0719795	0.0384009	1	0	no_fct
ENSG00000183298	-1.12074	-0.85452	0.000338911	0.0166735	0.00889528	1	1	no_fct
ENSG00000177363	-1.12293	-0.511068	0.000107653	0.0107035	0.00571029	1	1	LRRN4_C-terminal_like
ENSG00000219507	-1.12298	-0.870005	0.00877938	0.0704553	0.0375878	1	0	no_fct
ENSG00000087076	-1.12806	-0.510837	0.00812203	0.0681169	0.0363402	1	0	hydroxysteroid_(17-beta)_dehydrogenase_14
ENSG00000177570	-1.12895	-0.908602	0.000646505	0.0204308	0.0108998	1	1	sterile_alpha_motif_domain_containing_12
ENSG00000138449	-1.13049	-0.316187	0.00356308	0.0455567	0.0243044	1	1	solute_carrier_family_40_(iron-regulated_transporter),_member_1
ENSG00000249465	-1.13109	-0.790737	0.0141394	0.0909047	0.0484974	1	0	no_fct
ENSG00000154736	-1.13807	-0.72639	0.00943148	0.0729311	0.0389086	1	0	ADAM_metallopeptidase_with_thrombospondin_type_1_motif,_5
ENSG00000188783	-1.14484	-0.460351	0.000220444	0.0147397	0.00786357	1	1	proline/arginine-rich_end_leucine-rich_repeat_protein
ENSG00000103472	-1.15469	-0.0414882	0.00047906	0.0185949	0.00992032	1	1	RRN3-like_protein_1
ENSG00000212789	-1.15978	-0.625534	0.00187057	0.0337206	0.0179899	1	1	suppression_of_tumorigenicity_13_(colon_carcinoma)_(Hsp70_interacting_protein)_pseudogene_5
ENSG00000203709	-1.16271	-0.616242	7.84043e-05	0.00966723	0.00515745	1	1	no_fct
ENSG00000123999	-1.16538	-0.300225	2.41002e-06	0.00295428	0.0015761	1	1	inhibin,_alpha
ENSG00000157399	-1.16667	-0.353408	4.96948e-05	0.00860012	0.00458814	1	1	arylsulfatase_E_(chondrodysplasia_punctata_1)
ENSG00000241043	-1.17186	0.350759	0.00187518	0.0337508	0.018006	1	1	no_fct
ENSG00000235776	-1.17316	-0.708107	0.00154835	0.0303279	0.0161799	1	1	no_fct
ENSG00000144218	-1.1815	-0.49316	0.00368489	0.0464082	0.0247587	1	1	AF4/FMR2_family,_member_3
ENSG00000234769	-1.19527	-0.447772	0.00172891	0.0324328	0.0173028	1	1	WAS_protein_family_homolog_4_pseudogene
ENSG00000229917	-1.19637	-0.822001	0.00418508	0.0490538	0.0261701	1	1	no_fct
ENSG00000101115	-1.19676	-0.596767	0.000119375	0.0111848	0.00596705	1	1	sal-like_4_(Drosophila)
ENSG00000158445	-1.19942	-0.612741	0.00830512	0.0687111	0.0366572	1	0	potassium_voltage-gated_channel,_Shab-related_subfamily,_member_1
ENSG00000213742	-1.19995	-0.683173	0.000439482	0.0181696	0.00969344	1	1	no_fct
ENSG00000242600	-1.20026	-0.545031	0.00189265	0.0339311	0.0181021	1	1	no_fct
ENSG00000235513	-1.20096	-0.237195	0.0116519	0.0814249	0.04344	1	0	no_fct
ENSG00000173838	-1.2012	-0.664083	0.00940866	0.0729258	0.0389057	1	0	membrane-associated_ring_finger_(C3HC4)_10
ENSG00000253508	-1.20244	-0.423385	0.00438705	0.0500648	0.0267094	1	0	no_fct
ENSG00000136895	-1.2059	-0.198685	0.00124688	0.0274574	0.0146485	1	1	GTPase_activating_Rap/RanGAP_domain-like_3
ENSG00000120162	-1.20673	-0.41834	0.00429788	0.0495844	0.0264532	1	1	MOB1,_Mps_One_Binder_kinase_activator-like_2B_(yeast)
ENSG00000104415	-1.21099	-0.280195	9.53758e-05	0.0103111	0.00550092	1	1	WNT1_inducible_signaling_pathway_protein_1
ENSG00000153165	-1.21382	-0.853622	0.0112966	0.0801994	0.0427862	1	0	no_fct
ENSG00000231259	-1.21542	-0.573288	0.00237067	0.0380404	0.0202945	1	1	no_fct
ENSG00000214535	-1.23428	-0.974721	0.00086448	0.0227487	0.0121364	1	1	no_fct
ENSG00000155011	-1.24005	-0.0981308	7.68262e-05	0.00964985	0.00514817	1	1	dickkopf_homolog_2_(Xenopus_laevis)
ENSG00000153237	-1.24348	-0.327122	1.34113e-05	0.00578573	0.00308667	1	1	coiled-coil_domain_containing_148
ENSG00000232150	-1.24532	-0.647232	0.000845716	0.022619	0.0120672	1	1	no_fct
ENSG00000143816	-1.2482	-0.346933	0.00102088	0.0244579	0.0130483	1	1	wingless-type_MMTV_integration_site_family,_member_9A
ENSG00000221625	-1.25594	-0.553855	0.0128416	0.0860595	0.0459125	1	0	no_fct
ENSG00000197558	-1.26198	-0.48254	0.000579617	0.0199167	0.0106255	1	1	SCO-spondin_homolog_(Bos_taurus)
ENSG00000091536	-1.26384	-0.138718	0.00455984	0.0512025	0.0273164	1	0	myosin_XVA
ENSG00000168918	-1.2644	-0.0746264	0.0038909	0.0477047	0.0254503	1	1	inositol_polyphosphate-5-phosphatase,_145kDa
ENSG00000113248	-1.2848	-0.160548	0.00111548	0.0260457	0.0138953	1	1	protocadherin_beta_15
ENSG00000126950	-1.29204	-0.451196	0.000885734	0.0230197	0.012281	1	1	transmembrane_protein_35
ENSG00000185008	-1.3068	-0.412712	0.000915561	0.0233848	0.0124757	1	1	roundabout,_axon_guidance_receptor,_homolog_2_(Drosophila)
ENSG00000188687	-1.308	-0.159655	0.00212094	0.0358199	0.0191098	1	1	solute_carrier_family_4,_sodium_bicarbonate_cotransporter,_member_5
ENSG00000163638	-1.31221	0.410134	0.000113248	0.0108174	0.00577103	1	1	ADAM_metallopeptidase_with_thrombospondin_type_1_motif,_9
ENSG00000244041	-1.31612	-0.634101	7.22167e-06	0.00529469	0.0028247	1	1	no_fct
ENSG00000101265	-1.31885	-0.298492	7.64176e-05	0.00964985	0.00514817	1	1	Ras_association_(RalGDS/AF-6)_domain_family_member_2
ENSG00000205795	-1.32657	-0.503215	0.00017536	0.0141733	0.00756144	1	1	cystin_1
ENSG00000206561	-1.32771	-0.314567	0.000101603	0.0105253	0.0056152	1	1	collagen-like_tail_subunit_(single_strand_of_homotrimer)_of_asymmetric_acetylcholinesterase
ENSG00000144134	-1.33639	-0.36926	0.000184096	0.0142967	0.00762724	1	1	RAB,_member_of_RAS_oncogene_family-like_2A
ENSG00000232386	-1.34211	-0.68506	0.00345569	0.0450361	0.0240267	1	1	no_fct
ENSG00000152154	-1.34649	-0.0509946	0.000832392	0.0224669	0.0119861	1	1	transmembrane_protein_178
ENSG00000231453	-1.34802	-0.0101207	0.000200509	0.014551	0.00776295	1	1	no_fct
ENSG00000215210	-1.34816	-0.767656	0.00562707	0.0574821	0.0306666	1	0	no_fct
ENSG00000130518	-1.35491	-0.633713	0.000394775	0.0176078	0.00939374	1	1	KIAA1683
ENSG00000231424	-1.35939	-0.499187	0.00793493	0.0676597	0.0360963	1	0	no_fct
ENSG00000114790	-1.35955	-0.246955	0.00307347	0.0424914	0.022669	1	1	Rho_guanine_nucleotide_exchange_factor_(GEF)_26
ENSG00000008277	-1.36409	-0.483607	0.000815606	0.022322	0.0119087	1	1	ADAM_metallopeptidase_domain_22
ENSG00000102230	-1.37508	0.414205	0.00270992	0.0400633	0.0213737	1	1	phosphate_cytidylyltransferase_1,_choline,_beta
ENSG00000145287	-1.37825	-0.576905	0.000610805	0.0201823	0.0107672	1	1	placenta-specific_8
ENSG00000158113	-1.38721	-0.47859	0.00288992	0.0413132	0.0220405	1	1	leucine_rich_repeat_containing_43
ENSG00000226360	-1.39014	-0.910728	0.00198456	0.0346073	0.0184629	1	1	ribosomal_protein_L10a_pseudogene_6
ENSG00000228903	-1.39666	-0.127122	0.00123199	0.0274574	0.0146485	1	1	no_fct
ENSG00000148053	-1.39998	-0.512581	0.00198563	0.0346073	0.0184629	1	1	neurotrophic_tyrosine_kinase,_receptor,_type_2
ENSG00000153823	-1.40794	-0.192436	1.83032e-05	0.00619444	0.00330472	1	1	phosphotyrosine_interaction_domain_containing_1
ENSG00000149634	-1.42027	-0.665515	0.000177703	0.01418	0.00756502	1	1	chromosome_20_open_reading_frame_165
ENSG00000178977	-1.42177	-0.267584	0.000238407	0.0151416	0.00807802	1	1	no_fct
ENSG00000247544	-1.42413	-0.214306	0.000621192	0.0203624	0.0108633	1	1	no_fct
ENSG00000227953	-1.43442	-0.385414	0.00196675	0.0345238	0.0184184	1	1	no_fct
ENSG00000157404	-1.43877	-0.114663	8.59113e-05	0.0100824	0.00537894	1	1	v-kit_Hardy-Zuckerman_4_feline_sarcoma_viral_oncogene_homolog
ENSG00000219755	-1.44857	-0.271623	0.000988708	0.0240793	0.0128462	1	1	no_fct
ENSG00000144285	-1.44895	-0.883506	0.0110498	0.0790195	0.0421567	1	0	sodium_channel,_voltage-gated,_type_I,_alpha_subunit
ENSG00000164056	-1.45283	-0.0944222	0.000406386	0.0178146	0.00950407	1	1	sprouty_homolog_1,_antagonist_of_FGF_signaling_(Drosophila)
ENSG00000213707	-1.46565	-0.599156	0.00884666	0.0707252	0.0377317	1	0	no_fct
ENSG00000245498	-1.48645	-0.272348	4.7874e-05	0.00860012	0.00458814	1	1	no_fct
ENSG00000172349	-1.49052	-0.458657	0.00277762	0.0405747	0.0216465	1	1	interleukin_16
ENSG00000256338	-1.50352	-0.937706	0.00388246	0.0476719	0.0254329	1	1	no_fct
ENSG00000184564	-1.50861	-0.584172	0.000328912	0.0165439	0.00882613	1	1	SLIT_and_NTRK-like_family,_member_6
ENSG00000242951	-1.51434	-0.991782	0.00857315	0.0695929	0.0371277	1	0	no_fct
ENSG00000110436	-1.5206	-0.568252	3.07526e-05	0.00700824	0.00373888	1	1	solute_carrier_family_1_(glial_high_affinity_glutamate_transporter),_member_2
ENSG00000138669	-1.52423	-0.149068	0.00911076	0.0719609	0.038391	1	0	protein_kinase,_cGMP-dependent,_type_II
ENSG00000214688	-1.53228	-0.662194	1.277e-05	0.00578573	0.00308667	1	1	chromosome_10_open_reading_frame_105
ENSG00000247508	-1.57183	-0.769907	0.00235797	0.0380404	0.0202945	1	1	no_fct
ENSG00000196966	-1.57408	-0.160898	1.61165e-05	0.00601344	0.00320816	1	1	histone_cluster_1,_H3e
ENSG00000101307	-1.57423	-1.23535	0.00556206	0.0570842	0.0304543	1	0	signal-regulatory_protein_beta_1
ENSG00000241923	-1.5748	-0.890482	0.00380442	0.0471466	0.0251526	1	1	no_fct
ENSG00000168255	-1.5963	-0.843183	0.00207654	0.0353902	0.0188806	1	1	polymerase_(RNA)_II_(DNA_directed)_polypeptide_J3
ENSG00000170667	-1.60067	0.1128	0.000140766	0.0124739	0.0066548	1	1	RAS_p21_protein_activator_4B
ENSG00000169174	-1.60086	0.720881	8.51914e-05	0.0100824	0.00537894	1	1	proprotein_convertase_subtilisin/kexin_type_9
ENSG00000128655	-1.60182	-0.548203	0.0128557	0.0860755	0.0459211	1	0	phosphodiesterase_11A
ENSG00000198348	-1.62315	-0.400075	0.00405148	0.0484925	0.0258706	1	1	no_fct
ENSG00000229344	-1.64953	-1.0943	0.0101729	0.0753049	0.040175	1	0	no_fct
ENSG00000226564	-1.67747	-1.25951	0.0104285	0.0760972	0.0405977	1	0	no_fct
ENSG00000224892	-1.68227	-0.6933	0.000557052	0.0197257	0.0105236	1	1	no_fct
ENSG00000155961	-1.70691	-0.847277	0.00135029	0.0284907	0.0151997	1	1	RAB39B,_member_RAS_oncogene_family
ENSG00000086696	-1.72131	-0.840343	0.00141059	0.0288868	0.0154111	1	1	hydroxysteroid_(17-beta)_dehydrogenase_2
ENSG00000164684	-1.72452	-0.412325	2.74777e-05	0.00669418	0.00357133	1	1	zinc_finger_protein_704
ENSG00000178662	-1.72696	-0.599488	0.00352241	0.0453778	0.0242089	1	1	cysteine-serine-rich_nuclear_protein_3
ENSG00000217130	-1.72809	-1.25207	0.00522423	0.0550453	0.0293666	1	0	no_fct
ENSG00000175886	-1.74449	-0.776607	0.000493472	0.018757	0.0100068	1	1	no_fct
ENSG00000105997	-1.77721	-0.56755	0.00151248	0.0300343	0.0160232	1	1	homeobox_A3
ENSG00000120262	-1.80179	-0.713757	0.000319746	0.0165439	0.00882613	1	1	chromosome_6_open_reading_frame_97
ENSG00000013293	-1.8054	-0.661342	5.6369e-05	0.00901292	0.00480837	1	1	solute_carrier_family_7_(orphan_transporter),_member_14
ENSG00000154263	-1.84406	-0.329487	0.000198583	0.014551	0.00776295	1	1	ATP-binding_cassette,_sub-family_A_(ABC1),_member_10
ENSG00000233899	-1.85815	-0.705935	7.74088e-05	0.00964985	0.00514817	1	1	no_fct
ENSG00000233622	-1.87464	-0.568281	9.81928e-06	0.00566468	0.00302209	1	1	no_fct
ENSG00000166432	-1.95814	-0.581358	0.000762202	0.0217709	0.0116147	1	1	zinc_finger,_matrin-type_1
ENSG00000102935	-1.96362	0.0618298	1.38049e-05	0.00578573	0.00308667	1	1	zinc_finger_protein_423
ENSG00000215283	-1.96825	-0.781369	0.0026469	0.0396961	0.0211778	1	1	no_fct
ENSG00000197584	-1.97854	-0.483584	6.27296e-05	0.00941584	0.00502333	1	1	potassium_large_conductance_calcium-activated_channel,_subfamily_M,_beta_member_2
ENSG00000213885	-1.99356	-1.12291	0.0133481	0.0881684	0.0470377	1	0	no_fct
ENSG00000231500	-2.01301	-1.54381	0.00110799	0.025953	0.0138459	1	1	ribosomal_protein_S18
ENSG00000143869	-2.02015	-0.740641	1.78925e-05	0.00619444	0.00330472	1	1	growth_differentiation_factor_7
ENSG00000213260	-2.06073	-1.10679	0.0123748	0.0841964	0.0449186	1	0	no_fct
ENSG00000236404	-2.12953	-0.532037	0.000295705	0.0161644	0.00862365	1	1	no_fct
ENSG00000250337	-2.20328	-0.559449	0.00362325	0.0458119	0.0244405	1	1	no_fct
ENSG00000106809	-2.21706	-0.672952	0.000213466	0.014551	0.00776295	1	1	osteoglycin
ENSG00000015568	-2.3066	-2.02919	0.00272419	0.0402337	0.0214646	1	1	RANBP2-like_and_GRIP_domain_containing_5
ENSG00000227376	-2.36321	-2.31602	0.000960024	0.023702	0.012645	1	1	no_fct
ENSG00000214199	-2.4583	-1.36644	0.0001665	0.0138373	0.00738219	1	1	no_fct
ENSG00000237991	-2.45893	-1.30791	0.00597459	0.0595435	0.0317663	1	0	no_fct
ENSG00000213599	-2.55387	-2.80849	1.38773e-05	0.00578573	0.00308667	1	1	sulfotransferase_family,_cytosolic,_1A,_phenol-preferring,_member_3
ENSG00000203827	-2.59433	-1.26202	0.000195074	0.0145175	0.00774504	1	1	neuroblastoma_breakpoint_family,_member_16
ENSG00000224208	-2.62928	-2.03937	0.00601293	0.0598445	0.0319269	1	0	no_fct
ENSG00000234742	-2.76237	-1.51279	0.000705035	0.0210794	0.0112458	1	1	no_fct
ENSG00000219146	-2.79155	-2.67386	0.00136644	0.0285836	0.0152493	1	1	no_fct
ENSG00000198759	-2.82435	0.342864	0.000526586	0.019377	0.0103376	1	1	EGF-like-domain,_multiple_6
ENSG00000229704	-2.88918	-2.71853	0.00393156	0.0478589	0.0255326	1	1	no_fct
ENSG00000106133	-3.00642	-2.50245	0.00240584	0.0381684	0.0203628	1	1	no_fct
ENSG00000231584	-3.09268	-0.993191	0.000377519	0.017289	0.00922362	1	1	no_fct
ENSG00000215006	-3.11396	-2.70096	0.00077218	0.0218019	0.0116312	1	1	no_fct
ENSG00000214653	-3.19819	-2.48679	0.00418891	0.0490596	0.0261732	1	1	heterogeneous_nuclear_ribonucleoprotein_A3_pseudogene_3
ENSG00000172058	-3.2254	-2.99752	0.00421423	0.0491861	0.0262407	1	1	small_EDRK-rich_factor_1A_(telomeric)
ENSG00000226790	-3.56686	-2.59674	0.000857573	0.022713	0.0121173	1	1	heterogeneous_nuclear_ribonucleoprotein_A3_pseudogene_1
ENSG00000152042	-3.74282	-1.65223	1.68558e-06	0.0024838	0.0013251	1	1	no_fct
ENSG00000219470	-3.82741	-3.83562	0.00114783	0.0264647	0.0141189	1	1	no_fct
ENSG00000196183	-3.94327	-3.2307	0.00302613	0.0420741	0.0224465	1	1	ribosomal_protein_S2_pseudogene_4
ENSG00000154545	-4.02038	-3.11096	0.00143801	0.0290565	0.0155016	1	1	melanoma_antigen_family_D,_4
ENSG00000243185	-4.11421	-2.90772	0.000279984	0.0159634	0.00851644	1	1	no_fct
ENSG00000204775	-4.19977	-0.813582	0.000457958	0.0184683	0.00985282	1	1	KM-PA-2_proteinUncharacterized_protein
ENSG00000224791	-4.58425	-3.44265	0.000590757	0.0199256	0.0106303	1	1	no_fct
ENSG00000252318	-5.0186	-3.53987	8.86884e-06	0.00566468	0.00302209	1	1	no_fct
ENSG00000214967	-5.24527	-2.94765	0.000105661	0.0107035	0.00571029	1	1	no_fct
ENSG00000242697	-6.42515	-5.34834	0.00048402	0.0186875	0.00996973	1	1	no_fct
ENSG00000076716	2.69305	2.54564	0.0151835	0.0946466	0.0504937	0	0	glypican_4
ENSG00000225338	2.42417	3.79056	0.0300073	0.136702	0.0729301	0	0	no_fct
ENSG00000196604	2.2422	3.12851	0.0536474	0.187581	0.100074	0	0	POTE_ankyrin_domain_family,_member_F
ENSG00000174196	2.22876	-2.41691	0.138399	0.328627	0.175322	0	0	no_fct
ENSG00000235847	2.20058	1.50118	0.036832	0.152148	0.0811707	0	0	no_fct
ENSG00000227184	2.13549	0.377439	0.0283703	0.132695	0.0707927	0	0	no_fct
ENSG00000213087	2.06808	3.19408	0.058571	0.197338	0.10528	0	0	no_fct
ENSG00000131620	1.9196	0.493721	0.0560058	0.192267	0.102574	0	0	anoctamin_1,_calcium_activated_chloride_channel
ENSG00000104267	1.91821	3.60129	0.0272301	0.130262	0.0694945	0	0	carbonic_anhydrase_II
ENSG00000205940	1.83749	2.38138	0.0476006	0.175803	0.0937903	0	0	heat_shock_protein_90kDa_alpha_(cytosolic),_class_B_member_2,_pseudogene
ENSG00000169508	1.83395	0.279214	0.0288614	0.134077	0.0715299	0	0	G_protein-coupled_receptor_183
ENSG00000162692	1.78435	-0.455332	0.0154086	0.0951259	0.0507494	0	0	vascular_cell_adhesion_molecule_1
ENSG00000236090	1.76632	1.1484	0.0489398	0.178548	0.0952548	0	0	no_fct
ENSG00000243802	1.75638	3.41763	0.0261693	0.127214	0.0678686	0	0	no_fct
ENSG00000168743	1.69619	2.87257	0.102686	0.27408	0.146221	0	0	nephronectin
ENSG00000244073	1.69433	1.5823	0.0344601	0.147143	0.0785004	0	0	no_fct
ENSG00000108753	1.61934	3.69636	0.0856671	0.245554	0.131002	0	0	HNF1_homeobox_B
ENSG00000214222	1.61053	2.70724	0.0428034	0.165607	0.088351	0	0	no_fct
ENSG00000177294	1.57853	0.68243	0.0254317	0.125453	0.0669289	0	0	F-box_protein_39
ENSG00000243680	1.57595	1.65013	0.0492423	0.178986	0.0954884	0	0	no_fct
ENSG00000229161	1.5741	1.31295	0.0393319	0.158109	0.0843508	0	0	no_fct
ENSG00000215284	1.54897	1.69662	0.080936	0.237733	0.12683	0	0	no_fct
ENSG00000213684	1.53663	1.76261	0.0414687	0.162914	0.0869142	0	0	no_fct
ENSG00000235354	1.49664	1.00146	0.0400102	0.159499	0.0850922	0	0	no_fct
ENSG00000171855	1.45877	2.63966	0.0482405	0.177094	0.0944795	0	0	interferon,_beta_1,_fibroblast
ENSG00000237749	1.4526	1.88312	0.0603002	0.200682	0.107064	0	0	no_fct
ENSG00000169436	1.42293	0.993298	0.020323	0.110188	0.0587849	0	0	collagen,_type_XXII,_alpha_1
ENSG00000213315	1.41043	1.15247	0.0300636	0.136703	0.0729309	0	0	no_fct
ENSG00000231831	1.40676	1.67741	0.0229848	0.118385	0.063158	0	0	no_fct
ENSG00000232561	1.373	-2.45281	0.222238	0.432024	0.230484	0	0	general_transcription_factor_IIi,_pseudogene_1
ENSG00000125384	1.34547	0.904936	0.0330507	0.144138	0.0768971	0	0	prostaglandin_E_receptor_2_(subtype_EP2),_53kDa
ENSG00000183022	1.3439	1.84448	0.0196511	0.108103	0.0576727	0	0	no_fct
ENSG00000230823	1.33427	1.10292	0.0477609	0.176037	0.0939152	0	0	chromobox_homolog_1_pseudogene_1
ENSG00000167207	1.3284	1.1415	0.017508	0.101959	0.054395	0	0	nucleotide-binding_oligomerization_domain_containing_2
ENSG00000174808	1.30633	2.04996	0.0533175	0.186973	0.0997495	0	0	betacellulin
ENSG00000236312	1.30353	1.08931	0.0235963	0.120479	0.0642755	0	0	no_fct
ENSG00000205426	1.25174	-0.0571186	0.0405851	0.160702	0.0857339	0	0	keratin_81
ENSG00000225357	1.19034	0.535413	0.0158564	0.0967431	0.0516122	0	0	no_fct
ENSG00000214541	1.17622	1.22401	0.193245	0.400315	0.213567	0	0	no_fct
ENSG00000230364	1.17361	0.771171	0.026423	0.128002	0.0682887	0	0	no_fct
ENSG00000186076	1.16778	-0.362332	0.477577	0.676341	0.360826	0	0	no_fct
ENSG00000218069	1.16143	1.03404	0.0295688	0.135882	0.0724925	0	0	no_fct
ENSG00000177770	1.15328	0.201605	0.0531702	0.186824	0.0996704	0	0	CDKN2A_interacting_protein_N-terminal_like_pseudogene_1
ENSG00000121075	1.14212	0.38478	0.0296622	0.136054	0.0725844	0	0	T-box_4
ENSG00000233155	1.12665	1.04118	0.0596043	0.199313	0.106333	0	0	no_fct
ENSG00000186871	1.11974	0.544942	0.0245524	0.123097	0.0656719	0	0	excision_repair_cross-complementing_rodent_repair_deficiency,_complementation_group_6-like
ENSG00000113645	1.10545	0.758687	0.0856258	0.245554	0.131002	0	0	WW_and_C2_domain_containing_1
ENSG00000213574	1.09751	1.99834	0.0364793	0.151678	0.0809197	0	0	no_fct
ENSG00000225536	1.09563	0.763158	0.0210086	0.112614	0.0600793	0	0	no_fct
ENSG00000228834	1.08992	0.736523	0.0451043	0.17043	0.0909241	0	0	no_fct
ENSG00000225101	1.08283	1.71858	0.0809524	0.237734	0.126831	0	0	olfactory_receptor,_family_52,_subfamily_K,_member_3_pseudogene
ENSG00000169248	1.07282	1.4193	0.238497	0.450358	0.240265	0	0	chemokine_(C-X-C_motif)_ligand_11
ENSG00000242960	1.06693	0.815844	0.0390629	0.157515	0.0840339	0	0	no_fct
ENSG00000220848	1.06442	1.23189	0.0529295	0.186188	0.099331	0	0	no_fct
ENSG00000213958	1.06087	-0.0312381	0.175011	0.376305	0.200758	0	0	no_fct
ENSG00000219986	1.04788	1.82904	0.231905	0.443212	0.236452	0	0	no_fct
ENSG00000227034	1.02888	1.02742	0.161453	0.359517	0.191802	0	0	no_fct
ENSG00000225093	1.02827	1.05521	0.0385592	0.156169	0.0833159	0	0	no_fct
ENSG00000213416	1.01859	-0.318362	0.076286	0.229691	0.12254	0	0	keratin_associated_protein_4-12
ENSG00000182329	1.0066	-0.422495	0.0656973	0.210211	0.112147	0	0	Uncharacterized_protein
ENSG00000249862	1.0056	0.222333	0.0161923	0.0976985	0.052122	0	0	no_fct
ENSG00000214018	1.0048	1.18072	0.150607	0.344417	0.183746	0	0	no_fct
ENSG00000241680	1.00217	2.58507	0.300285	0.517236	0.275944	0	0	no_fct
ENSG00000227934	0.999528	0.00450864	0.00244999	0.0382221	0.0203914	0	0	no_fct
ENSG00000172548	0.997398	-0.320933	0.0387142	0.156539	0.0835133	0	0	NIPA-like_domain_containing_4
ENSG00000185885	0.995625	1.81044	0.000127825	0.0118258	0.00630905	0	0	interferon_induced_transmembrane_protein_1_(9-27)
ENSG00000142731	0.993169	0.653949	0.00971752	0.0737021	0.0393199	0	0	polo-like_kinase_4
ENSG00000135333	0.992689	3.90153	0.345864	0.561366	0.299488	0	0	EPH_receptor_A7
ENSG00000197299	0.992206	0.524848	0.00776556	0.0669586	0.0357222	0	0	Bloom_syndrome,_RecQ_helicase-like
ENSG00000011426	0.988277	0.322442	0.00338059	0.0447602	0.0238794	0	0	anillin,_actin_binding_protein
ENSG00000154451	0.987988	1.65123	0.0961578	0.263896	0.140788	0	0	guanylate_binding_protein_5
ENSG00000169607	0.987894	0.365419	0.00392129	0.0478294	0.0255169	0	0	cytoskeleton_associated_protein_2-like
ENSG00000049089	0.987369	0.115269	0.00955114	0.0730874	0.038992	0	0	collagen,_type_IX,_alpha_2
ENSG00000130303	0.985318	3.50999	0.0485368	0.177694	0.0947996	0	0	bone_marrow_stromal_cell_antigen_2
ENSG00000128944	0.985039	0.313735	0.000210679	0.014551	0.00776295	0	0	chromosome_15_open_reading_frame_23
ENSG00000105246	0.984495	-0.311415	0.0103334	0.0758487	0.0404651	0	0	Epstein-Barr_virus_induced_3
ENSG00000174292	0.982397	-0.140859	0.00471032	0.0520577	0.0277726	0	0	tyrosine_kinase,_non-receptor,_1
ENSG00000132109	0.981725	1.31919	6.50678e-05	0.00964985	0.00514817	0	0	tripartite_motif_containing_21
ENSG00000145040	0.981564	0.0600318	0.00041618	0.0179723	0.0095882	0	0	urocortin_2
ENSG00000239332	0.980203	-0.287501	9.56602e-05	0.0103111	0.00550092	0	0	no_fct
ENSG00000228232	0.979402	0.586345	0.00610292	0.0599483	0.0319823	0	0	no_fct
ENSG00000164330	0.979161	0.430298	0.00267085	0.0398127	0.02124	0	0	early_B-cell_factor_1
ENSG00000165304	0.978749	0.618528	0.00123224	0.0274574	0.0146485	0	0	maternal_embryonic_leucine_zipper_kinase
ENSG00000054356	0.975802	0.687233	0.0118076	0.0821244	0.0438132	0	0	protein_tyrosine_phosphatase,_receptor_type,_N
ENSG00000235013	0.975702	0.970606	0.0651359	0.209569	0.111804	0	0	no_fct
ENSG00000134716	0.975407	1.17654	0.067057	0.212817	0.113538	0	0	cytochrome_P450,_family_2,_subfamily_J,_polypeptide_2
ENSG00000013810	0.974516	0.282659	7.57505e-05	0.00964985	0.00514817	0	0	transforming,_acidic_coiled-coil_containing_protein_3
ENSG00000167077	0.973777	-0.290592	0.0571697	0.194531	0.103782	0	0	meiosis_inhibitor_1
ENSG00000161921	0.97351	0.964471	0.000327196	0.0165439	0.00882613	0	0	chemokine_(C-X-C_motif)_ligand_16
ENSG00000174371	0.973247	0.331326	0.000923589	0.0234646	0.0125183	0	0	exonuclease_1
ENSG00000177989	0.972595	1.29113	0.00924651	0.0723105	0.0385775	0	0	outer_dense_fiber_of_sperm_tails_3B
ENSG00000198805	0.971974	0.702973	6.33095e-06	0.00529469	0.0028247	0	0	purine_nucleoside_phosphorylase
ENSG00000248626	0.971565	0.740242	0.184277	0.388054	0.207026	0	0	no_fct
ENSG00000224543	0.967569	0.487613	0.00181668	0.0331968	0.0177104	0	0	small_nuclear_ribonucleoprotein_G-like_protein_
ENSG00000137812	0.966323	0.207767	0.00186874	0.0337206	0.0179899	0	0	cancer_susceptibility_candidate_5
ENSG00000070808	0.963711	0.0797239	0.0140373	0.0905654	0.0483164	0	0	calcium/calmodulin-dependent_protein_kinase_II_alpha
ENSG00000171848	0.962871	0.539378	0.00580673	0.0585048	0.0312122	0	0	ribonucleotide_reductase_M2
ENSG00000228221	0.961824	-0.382615	0.00499197	0.0536518	0.0286231	0	0	no_fct
ENSG00000133328	0.960172	1.23017	0.16257	0.360912	0.192546	0	0	HRAS-like_suppressor_2
ENSG00000185697	0.95959	0.366078	0.00344688	0.0450299	0.0240234	0	0	v-myb_myeloblastosis_viral_oncogene_homolog_(avian)-like_1
ENSG00000198901	0.958085	0.373927	0.000495186	0.0187573	0.010007	0	0	protein_regulator_of_cytokinesis_1
ENSG00000164342	0.956061	1.39757	0.0220378	0.115637	0.0616923	0	0	toll-like_receptor_3
ENSG00000248113	0.95456	0.544359	0.0318982	0.141247	0.0753549	0	0	no_fct
ENSG00000188290	0.953224	1.31963	0.00508042	0.0541151	0.0288703	0	0	hairy_and_enhancer_of_split_4_(Drosophila)
ENSG00000117724	0.952323	0.306723	0.0147363	0.0929948	0.0496125	0	0	centromere_protein_F,_350/400kDa_(mitosin)
ENSG00000225131	0.951812	1.13098	0.00845031	0.0692755	0.0369583	0	0	proteasome_activator_subunit_2_pseudogene_2
ENSG00000180211	0.951411	1.01024	0.0545047	0.189363	0.101025	0	0	no_fct
ENSG00000138778	0.950616	0.223148	0.00620908	0.0603291	0.0321854	0	0	centromere_protein_E,_312kDa
ENSG00000205413	0.94707	1.65421	0.0198268	0.108785	0.0580365	0	0	sterile_alpha_motif_domain_containing_9
ENSG00000163131	0.944375	1.09882	0.00226625	0.0371522	0.0198206	0	0	cathepsin_S
ENSG00000134668	0.944118	0.144251	9.32546e-06	0.00566468	0.00302209	0	0	SPOC_domain_containing_1
ENSG00000253606	0.943748	1.13616	0.0474877	0.175621	0.0936935	0	0	no_fct
ENSG00000198768	0.943735	0.440004	0.00116239	0.0265508	0.0141648	0	0	adenomatosis_polyposis_coli_down-regulated_1-like
ENSG00000179294	0.942216	0.889671	0.00604057	0.059861	0.0319357	0	0	chromosome_17_open_reading_frame_96
ENSG00000189320	0.940967	0.456691	0.00530871	0.0553445	0.0295262	0	0	family_with_sequence_similarity_180,_member_A
ENSG00000196584	0.939548	0.258741	0.000162355	0.0138049	0.00736488	0	0	X-ray_repair_complementing_defective_repair_in_Chinese_hamster_cells_2
ENSG00000162840	0.939504	0.414241	0.0027279	0.0402458	0.021471	0	0	metallothionein_1_pseudogene_2
ENSG00000177602	0.933558	0.418354	0.00113959	0.0263574	0.0140616	0	0	germ_cell_associated_2_(haspin)
ENSG00000161888	0.932964	0.257968	0.00605004	0.0598795	0.0319456	0	0	SPC24,_NDC80_kinetochore_complex_component,_homolog_(S._cerevisiae)
ENSG00000095752	0.931938	0.312903	0.00146466	0.0293131	0.0156385	0	0	interleukin_11
ENSG00000105088	0.931545	0.523555	0.00244787	0.0382221	0.0203914	0	0	olfactomedin_2
ENSG00000104043	0.931139	0.00561499	0.0300468	0.136702	0.0729301	0	0	ATPase,_class_I,_type_8B,_member_4
ENSG00000105825	0.931072	0.504088	0.000296695	0.0161644	0.00862365	0	0	tissue_factor_pathway_inhibitor_2
ENSG00000230662	0.930684	0.833057	0.0780692	0.232469	0.124022	0	0	no_fct
ENSG00000127507	0.930681	-0.308375	0.0080087	0.0678227	0.0361833	0	0	egf-like_module_containing,_mucin-like,_hormone_receptor-like_2
ENSG00000228348	0.929238	0.28241	0.0712806	0.220348	0.117555	0	0	no_fct
ENSG00000151725	0.928691	0.462844	0.0114459	0.0807537	0.0430819	0	0	MLF1_interacting_protein
ENSG00000203760	0.928454	0.260222	0.000328055	0.0165439	0.00882613	0	0	no_fct
ENSG00000139278	0.927389	0.430191	0.000611919	0.0201823	0.0107672	0	0	GLI_pathogenesis-related_1
ENSG00000146374	0.925586	3.00974	0.187429	0.392635	0.20947	0	0	R-spondin_3
ENSG00000158246	0.924573	-0.183362	0.000591784	0.0199256	0.0106303	0	0	family_with_sequence_similarity_46,_member_B
ENSG00000088538	0.924175	0.413891	0.000478736	0.0185949	0.00992032	0	0	dedicator_of_cytokinesis_3
ENSG00000164176	0.924067	0.270209	0.00904522	0.0716121	0.0382049	0	0	EGF-like_repeats_and_discoidin_I-like_domains_3
ENSG00000146410	0.923469	0.836524	0.000649767	0.0204308	0.0108998	0	0	family_with_sequence_similarity_54,_member_A
ENSG00000109674	0.923109	0.33515	0.00349257	0.0452617	0.024147	0	0	nei_endonuclease_VIII-like_3_(E._coli)
ENSG00000189057	0.922379	0.270745	0.00429463	0.0495844	0.0264532	0	0	family_with_sequence_similarity_111,_member_B
ENSG00000225355	0.920762	0.845457	0.0173836	0.101774	0.054296	0	0	no_fct
ENSG00000142677	0.919381	1.29522	0.2001	0.407611	0.21746	0	0	interleukin_22_receptor,_alpha_1
ENSG00000225568	0.919155	0.858018	0.0267194	0.12874	0.0686824	0	0	no_fct
ENSG00000137965	0.91867	2.75822	0.00472161	0.0520668	0.0277775	0	0	interferon-induced_protein_44
ENSG00000157456	0.916909	0.329523	0.00317336	0.0434246	0.0231669	0	0	cyclin_B2
ENSG00000237943	0.916747	0.314214	0.00372161	0.0467497	0.0249409	0	0	no_fct
ENSG00000232727	0.916697	0.869591	0.0834671	0.241975	0.129093	0	0	no_fct
ENSG00000172244	0.91642	0.281583	0.00113253	0.0262769	0.0140186	0	0	chromosome_5_open_reading_frame_34
ENSG00000231131	0.914727	-0.407244	0.000203024	0.014551	0.00776295	0	0	no_fct
ENSG00000116183	0.914536	0.237652	0.0178189	0.102647	0.054762	0	0	pappalysin_2
ENSG00000121621	0.91336	0.264627	0.00509802	0.0542241	0.0289284	0	0	kinesin_family_member_18A
ENSG00000231409	0.912837	2.04559	0.270383	0.484863	0.258673	0	0	no_fct
ENSG00000120539	0.911486	1.07429	0.004963	0.0534841	0.0285336	0	0	microtubule_associated_serine/threonine_kinase-like
ENSG00000169684	0.909623	0.704683	0.00625709	0.0604058	0.0322263	0	0	cholinergic_receptor,_nicotinic,_alpha_5
ENSG00000079616	0.909509	0.33154	0.000800681	0.0221575	0.011821	0	0	kinesin_family_member_22
ENSG00000229417	0.90948	1.86537	0.20807	0.416196	0.22204	0	0	no_fct
ENSG00000115541	0.907453	0.614622	0.00172041	0.0323621	0.0172651	0	0	heat_shock_10kDa_protein_1_(chaperonin_10)
ENSG00000171860	0.90665	1.51685	0.0433281	0.166891	0.0890358	0	0	complement_component_3a_receptor_1
ENSG00000254449	0.905797	0.878069	0.101763	0.272765	0.14552	0	0	no_fct
ENSG00000206190	0.904663	0.826855	0.000159836	0.0137496	0.0073354	0	0	ATPase,_class_V,_type_10A
ENSG00000072133	0.903624	-0.00318038	9.46249e-05	0.0103111	0.00550092	0	0	ribosomal_protein_S6_kinase,_90kDa,_polypeptide_6
ENSG00000168062	0.902142	2.12871	0.0373342	0.153222	0.0817436	0	0	basic_leucine_zipper_transcription_factor,_ATF-like_2
ENSG00000137807	0.898825	0.363362	0.00180865	0.0331355	0.0176777	0	0	kinesin_family_member_23
ENSG00000156587	0.898054	1.18134	0.000749164	0.0216134	0.0115307	0	0	ubiquitin-conjugating_enzyme_E2L_6
ENSG00000109472	0.896839	1.36738	0.119101	0.300006	0.160053	0	0	carboxypeptidase_E
ENSG00000186417	0.894583	-0.244312	0.0118664	0.0823232	0.0439192	0	0	gliomedin
ENSG00000183763	0.893492	0.450374	0.009382	0.0728281	0.0388536	0	0	TRAF_interacting_protein
ENSG00000187193	0.893338	0.00742111	0.000644489	0.0204308	0.0108998	0	0	metallothionein_1X
ENSG00000233461	0.892051	0.347042	0.00700268	0.0637673	0.0340197	0	0	no_fct
ENSG00000133401	0.891101	1.65346	0.0637794	0.207428	0.110662	0	0	PDZ_domain_containing_2
ENSG00000225099	0.890553	0.525971	0.0278263	0.131269	0.0700315	0	0	no_fct
ENSG00000123219	0.89015	0.324556	0.000478395	0.0185949	0.00992032	0	0	centromere_protein_K
ENSG00000047936	0.889018	0.0601887	0.011697	0.0817015	0.0435875	0	0	c-ros_oncogene_1_,_receptor_tyrosine_kinase
ENSG00000168404	0.888744	1.06012	0.000678196	0.0207407	0.0110651	0	0	mixed_lineage_kinase_domain-like
ENSG00000177791	0.887374	-0.783482	0.10977	0.285085	0.152092	0	0	myozenin_1
ENSG00000069482	0.884327	0.473988	0.000231675	0.0149471	0.00797423	0	0	galanin_prepropeptide
ENSG00000065328	0.883187	0.434314	0.00497919	0.0536193	0.0286058	0	0	minichromosome_maintenance_complex_component_10
ENSG00000153044	0.882698	0.468994	0.0128104	0.0860013	0.0458815	0	0	centromere_protein_H
ENSG00000136122	0.881672	0.367977	0.000201238	0.014551	0.00776295	0	0	bora,_aurora_kinase_A_activator
ENSG00000240583	0.880807	-0.225645	0.169259	0.368945	0.196831	0	0	aquaporin_1_(Colton_blood_group)
ENSG00000238082	0.880473	1.07039	0.0328112	0.14369	0.076658	0	0	no_fct
ENSG00000198300	0.880372	0.551275	0.0227891	0.117706	0.0627961	0	0	zinc_finger,_imprinted_2
ENSG00000110446	0.879914	1.48973	0.00296892	0.0418462	0.0223248	0	0	solute_carrier_family_15,_member_3
ENSG00000243859	0.877203	0.716664	0.0395134	0.158435	0.0845245	0	0	no_fct
ENSG00000167900	0.876354	0.230041	0.000728369	0.0213678	0.0113997	0	0	thymidine_kinase_1,_soluble
ENSG00000217027	0.87561	1.52718	0.237921	0.449907	0.240024	0	0	no_fct
ENSG00000068489	0.87352	0.300615	0.00284315	0.0410027	0.0218748	0	0	proline_rich_11
ENSG00000161800	0.873354	0.343433	0.00134282	0.0284907	0.0151997	0	0	Rac_GTPase_activating_protein_1
ENSG00000205336	0.871721	0.400027	0.0348575	0.147814	0.0788584	0	0	G_protein-coupled_receptor_56
ENSG00000240065	0.86892	1.34085	0.00353213	0.0453778	0.0242089	0	0	proteasome_(prosome,_macropain)_subunit,_beta_type,_9_(large_multifunctional_peptidase_2)
ENSG00000247516	0.868129	0.334544	0.000677796	0.0207407	0.0110651	0	0	no_fct
ENSG00000165731	0.866852	1.36594	0.0324679	0.142909	0.0762417	0	0	ret_proto-oncogene
ENSG00000171320	0.865477	0.510208	0.00669917	0.062273	0.0332225	0	0	establishment_of_cohesion_1_homolog_2_(S._cerevisiae)
ENSG00000231203	0.864495	0.971337	0.281539	0.497029	0.265164	0	0	no_fct
ENSG00000088325	0.864346	0.335566	0.000644639	0.0204308	0.0108998	0	0	TPX2,_microtubule-associated,_homolog_(Xenopus_laevis)
ENSG00000092853	0.864342	0.492888	0.000584999	0.0199167	0.0106255	0	0	claspin
ENSG00000152270	0.863713	-0.376669	0.0436848	0.167693	0.0894641	0	0	phosphodiesterase_3B,_cGMP-inhibited
ENSG00000146205	0.86083	0.445236	0.00335031	0.0446623	0.0238272	0	0	anoctamin_7
ENSG00000186352	0.858003	0.859964	0.0104857	0.0763965	0.0407573	0	0	ankyrin_repeat_domain_37
ENSG00000186193	0.857873	0.37399	0.00112467	0.0261368	0.0139439	0	0	chromosome_9_open_reading_frame_140
ENSG00000149201	0.856826	0.221271	0.000993555	0.0241175	0.0128666	0	0	coiled-coil_domain_containing_81
ENSG00000127329	0.856778	0.266476	0.0179012	0.102976	0.0549372	0	0	protein_tyrosine_phosphatase,_receptor_type,_B
ENSG00000103966	0.855145	0.862674	0.000909884	0.0233641	0.0124647	0	0	EH-domain_containing_4
ENSG00000115415	0.854225	1.53539	0.00014407	0.0126696	0.00675918	0	0	signal_transducer_and_activator_of_transcription_1,_91kDa
ENSG00000163535	0.854124	0.413977	0.00707519	0.0641653	0.034232	0	0	shugoshin-like_2_(S._pombe)
ENSG00000214357	0.853961	0.115664	0.000364059	0.0172472	0.00920136	0	0	neuralized_homolog_1B_(Drosophila)
ENSG00000100526	0.851865	0.23552	0.00185528	0.0336092	0.0179304	0	0	cyclin-dependent_kinase_inhibitor_3
ENSG00000164611	0.851232	0.403003	0.00452892	0.0511285	0.0272769	0	0	pituitary_tumor-transforming_1
ENSG00000170681	0.850277	-0.0333539	0.000225479	0.0149093	0.0079541	0	0	muscle-related_coiled-coil_protein
ENSG00000010030	0.849547	1.99735	0.0770175	0.231021	0.123249	0	0	ets_variant_7
ENSG00000174640	0.848778	-0.172169	0.0345196	0.147226	0.0785449	0	0	solute_carrier_organic_anion_transporter_family,_member_2A1
ENSG00000215784	0.848643	0.122267	0.0956436	0.262926	0.14027	0	0	family_with_sequence_similarity_72,_member_D
ENSG00000165244	0.847315	0.437644	0.00754694	0.0661594	0.0352959	0	0	zinc_finger_protein_367
ENSG00000238000	0.846691	1.21189	0.060706	0.201486	0.107492	0	0	no_fct
ENSG00000206337	0.846352	0.378541	0.00056489	0.019816	0.0105718	0	0	HLA_complex_P5_(non-protein_coding)
ENSG00000106236	0.846291	0.15706	0.0385129	0.156068	0.0832617	0	0	neuronal_pentraxin_II
ENSG00000250444	0.84523	0.764165	0.126096	0.311392	0.166127	0	0	no_fct
ENSG00000117877	0.841469	0.411095	0.000132844	0.0120626	0.00643535	0	0	CD3e_molecule,_epsilon_associated_protein
ENSG00000119508	0.841193	0.988575	0.0252445	0.125032	0.0667045	0	0	nuclear_receptor_subfamily_4,_group_A,_member_3
ENSG00000134070	0.841164	0.212598	0.00087204	0.0228505	0.0121907	0	0	interleukin-1_receptor-associated_kinase_2
ENSG00000131153	0.840721	0.379402	0.00134839	0.0284907	0.0151997	0	0	GINS_complex_subunit_2_(Psf2_homolog)
ENSG00000185507	0.83998	2.31275	0.0092692	0.0724277	0.03864	0	0	interferon_regulatory_factor_7
ENSG00000163507	0.839374	0.280543	0.000267782	0.0156615	0.00835539	0	0	KIAA1524
ENSG00000107968	0.837867	0.192638	0.000370829	0.017289	0.00922362	0	0	mitogen-activated_protein_kinase_kinase_kinase_8
ENSG00000117525	0.837462	0.0961363	0.00165496	0.0316595	0.0168903	0	0	coagulation_factor_III_(thromboplastin,_tissue_factor)
ENSG00000235878	0.835381	0.517577	0.016433	0.0984754	0.0525364	0	0	Uncharacterized_protein
ENSG00000227036	0.834715	0.107592	0.00871255	0.0702255	0.0374651	0	0	no_fct
ENSG00000080573	0.834084	0.640588	0.00474988	0.0522632	0.0278823	0	0	collagen,_type_V,_alpha_3
ENSG00000214982	0.83353	-0.00676174	0.0277162	0.131116	0.06995	0	0	no_fct
ENSG00000059378	0.833195	1.55013	0.000815851	0.022322	0.0119087	0	0	poly_(ADP-ribose)_polymerase_family,_member_12
ENSG00000085999	0.833052	0.533308	0.000179928	0.01418	0.00756502	0	0	RAD54-like_(S._cerevisiae)
ENSG00000115604	0.832455	2.09954	0.169877	0.369769	0.197271	0	0	interleukin_18_receptor_1
ENSG00000100162	0.831916	0.408149	0.000573016	0.0199167	0.0106255	0	0	centromere_protein_M
ENSG00000135424	0.83096	0.240172	0.00241828	0.0381684	0.0203628	0	0	integrin,_alpha_7
ENSG00000140853	0.830934	0.704992	0.000112352	0.0108174	0.00577103	0	0	NLR_family,_CARD_domain_containing_5
ENSG00000115380	0.827954	-0.153484	0.000543957	0.01966	0.0104885	0	0	EGF_containing_fibulin-like_extracellular_matrix_protein_1
ENSG00000234176	0.827939	1.42197	0.2195	0.429253	0.229006	0	0	no_fct
ENSG00000025423	0.827481	-0.463788	0.00621726	0.0603291	0.0321854	0	0	hydroxysteroid_(17-beta)_dehydrogenase_6_homolog_(mouse)
ENSG00000150667	0.826766	0.162385	0.00666863	0.0621251	0.0331436	0	0	fibrous_sheath_interacting_protein_1
ENSG00000120526	0.826613	0.827414	0.00860791	0.0695929	0.0371277	0	0	NudC_domain_containing_1
ENSG00000225492	0.826428	2.1301	0.243289	0.455616	0.24307	0	0	no_fct
ENSG00000131737	0.825918	-0.247331	0.00605392	0.0598795	0.0319456	0	0	keratin_34
ENSG00000138035	0.825607	1.44883	0.00971373	0.0737021	0.0393199	0	0	polyribonucleotide_nucleotidyltransferase_1
ENSG00000188368	0.824501	0.0550315	0.000338123	0.0166735	0.00889528	0	0	proline_rich_19
ENSG00000232855	0.822588	-0.352281	0.00769115	0.0667543	0.0356133	0	0	no_fct
ENSG00000109339	0.822074	-0.104596	0.000302416	0.0163549	0.00872531	0	0	mitogen-activated_protein_kinase_10
ENSG00000246763	0.819653	0.316259	0.000154111	0.0133352	0.00711428	0	0	no_fct
ENSG00000204261	0.818979	0.872144	0.00666702	0.0621251	0.0331436	0	0	no_fct
ENSG00000104856	0.81839	0.272314	0.00812027	0.0681169	0.0363402	0	0	v-rel_reticuloendotheliosis_viral_oncogene_homolog_B
ENSG00000213526	0.815937	0.633998	0.000543724	0.01966	0.0104885	0	0	no_fct
ENSG00000249992	0.81585	0.376592	0.0002098	0.014551	0.00776295	0	0	no_fct
ENSG00000113368	0.814907	0.321427	0.0116024	0.0811174	0.043276	0	0	lamin_B1
ENSG00000166145	0.81372	0.244346	0.0069398	0.0635249	0.0338904	0	0	serine_peptidase_inhibitor,_Kunitz_type_1
ENSG00000196559	0.813188	-0.0114758	0.000406915	0.0178146	0.00950407	0	0	chromosome_11_open_reading_frame_55
ENSG00000146094	0.813161	0.41511	0.00102942	0.0245029	0.0130722	0	0	docking_protein_3
ENSG00000207700	0.812248	-0.0425912	0.000765157	0.0218019	0.0116312	0	0	microRNA_145
ENSG00000139354	0.811765	0.192775	0.00016382	0.0138373	0.00738219	0	0	growth_arrest-specific_2_like_3
ENSG00000250469	0.810939	-1.10096	0.105126	0.27813	0.148382	0	0	no_fct
ENSG00000094804	0.80995	0.444947	0.0026827	0.0398611	0.0212658	0	0	cell_division_cycle_6_homolog_(S._cerevisiae)
ENSG00000213443	0.809572	0.787151	0.0039436	0.0479028	0.025556	0	0	no_fct
ENSG00000131459	0.809552	-0.0920025	2.02184e-05	0.00619444	0.00330472	0	0	glutamine-fructose-6-phosphate_transaminase_2
ENSG00000241511	0.808982	0.980847	0.114306	0.292381	0.155985	0	0	no_fct
ENSG00000129810	0.808979	0.478032	0.00960906	0.0732978	0.0391042	0	0	shugoshin-like_1_(S._pombe)
ENSG00000122952	0.807434	0.427388	0.00119021	0.02689	0.0143458	0	0	ZW10_interactor
ENSG00000166349	0.807066	-0.497951	0.0247755	0.123583	0.0659314	0	0	recombination_activating_gene_1
ENSG00000184979	0.806044	2.9404	0.0173866	0.101774	0.054296	0	0	ubiquitin_specific_peptidase_18
ENSG00000174871	0.805925	-0.155145	0.0770439	0.231053	0.123266	0	0	cornichon_homolog_2_(Drosophila)
ENSG00000183876	0.805785	0.285113	0.000256039	0.0155634	0.00830303	0	0	arylsulfatase_family,_member_I
ENSG00000157680	0.805468	0.00713916	0.000716474	0.0212059	0.0113133	0	0	diacylglycerol_kinase,_iota
ENSG00000255898	0.805463	0.412429	0.0540697	0.18855	0.100591	0	0	no_fct
ENSG00000239672	0.804876	0.422993	0.00191753	0.0341074	0.0181962	0	0	non-metastatic_cells_1,_protein_(NM23A)_expressed_in
ENSG00000241749	0.804295	0.453559	0.00324587	0.0437642	0.0233481	0	0	no_fct
ENSG00000137507	0.801896	0.151622	0.000694726	0.0209414	0.0111722	0	0	leucine_rich_repeat_containing_32
ENSG00000196878	0.801443	-0.164167	0.00207468	0.0353902	0.0188806	0	0	laminin,_beta_3
ENSG00000110328	0.798951	0.294991	0.00153859	0.0302576	0.0161424	0	0	UDP-N-acetyl-alpha-D-galactosamine:polypeptide_N-acetylgalactosaminyltransferase-like_4
ENSG00000102837	0.79844	-0.104817	0.00162671	0.0313616	0.0167313	0	0	olfactomedin_4
ENSG00000137877	0.798429	1.15329	0.00146079	0.0292756	0.0156184	0	0	spectrin,_beta,_non-erythrocytic_5
ENSG00000147573	0.797272	-0.017169	0.00950695	0.073046	0.0389699	0	0	tripartite_motif_containing_55
ENSG00000188092	0.795683	-0.508169	0.00158201	0.0309459	0.0165096	0	0	G_protein-coupled_receptor_89B
ENSG00000119139	0.794965	0.444239	0.000844704	0.022619	0.0120672	0	0	tight_junction_protein_2_(zona_occludens_2)
ENSG00000225963	0.794473	1.27682	0.0991887	0.268556	0.143274	0	0	no_fct
ENSG00000234390	0.793627	0.0677138	0.00469132	0.0520168	0.0277509	0	0	no_fct
ENSG00000138182	0.793508	0.271295	0.00207978	0.0353902	0.0188806	0	0	kinesin_family_member_20B
ENSG00000204642	0.792557	1.44498	0.00797111	0.0676981	0.0361168	0	0	major_histocompatibility_complex,_class_I,_F
ENSG00000158164	0.790468	0.220303	0.0109139	0.0784306	0.0418426	0	0	thymosin_beta_15a
ENSG00000126860	0.789733	0.146084	0.0335911	0.145416	0.0775792	0	0	ecotropic_viral_integration_site_2A
ENSG00000166803	0.789642	0.32198	0.000918097	0.0233848	0.0124757	0	0	KIAA0101
ENSG00000215492	0.789085	0.242827	0.0755739	0.228367	0.121833	0	0	heterogeneous_nuclear_ribonucleoprotein_A1_pseudogene_7
ENSG00000118503	0.787707	0.560796	0.000480396	0.0185964	0.00992113	0	0	tumor_necrosis_factor,_alpha-induced_protein_3
ENSG00000156500	0.786982	0.486483	0.00646725	0.0611826	0.0326408	0	0	family_with_sequence_similarity_122C
ENSG00000137462	0.786839	0.619311	0.125739	0.310706	0.165761	0	0	toll-like_receptor_2
ENSG00000169252	0.785811	1.2422	0.000442438	0.0182304	0.00972589	0	0	adrenergic,_beta-2-,_receptor,_surface
ENSG00000178860	0.785294	0.637946	0.0104952	0.0763987	0.0407586	0	0	musculin
ENSG00000137563	0.784148	0.445234	0.0157731	0.096435	0.0514478	0	0	gamma-glutamyl_hydrolase_(conjugase,_folylpolygammaglutamyl_hydrolase)
ENSG00000133106	0.784082	2.08094	0.0240988	0.121945	0.0650573	0	0	epithelial_stromal_interaction_1_(breast)
ENSG00000117152	0.784036	0.54943	0.0128555	0.0860755	0.0459211	0	0	regulator_of_G-protein_signaling_4
ENSG00000187741	0.783274	0.347314	0.000956793	0.0236943	0.0126409	0	0	Fanconi_anemia,_complementation_group_A
ENSG00000184451	0.783071	-0.242849	0.169971	0.369903	0.197343	0	0	chemokine_(C-C_motif)_receptor_10
ENSG00000111674	0.782759	0.55184	0.00115645	0.0265508	0.0141648	0	0	enolase_2_(gamma,_neuronal)
ENSG00000231924	0.782653	-0.869012	9.42988e-05	0.0103111	0.00550092	0	0	pregnancy_specific_beta-1-glycoprotein_1
ENSG00000185972	0.781869	0.451422	0.0300919	0.136705	0.0729319	0	0	calicin
ENSG00000151164	0.780979	-0.19162	0.00019245	0.014445	0.00770636	0	0	RAD9_homolog_B_(S._pombe)
ENSG00000185052	0.780905	-0.0454695	7.53739e-05	0.00964985	0.00514817	0	0	solute_carrier_family_24_(sodium/potassium/calcium_exchanger),_member_3
ENSG00000168040	0.780848	0.318033	0.0511879	0.182761	0.0975024	0	0	Fas_(TNFRSF6)-associated_via_death_domain
ENSG00000104419	0.780025	0.328081	0.00405756	0.0485258	0.0258884	0	0	N-myc_downstream_regulated_1
ENSG00000214264	0.779674	0.197577	0.000164774	0.0138373	0.00738219	0	0	no_fct
ENSG00000198826	0.77796	0.260481	0.00211013	0.0357335	0.0190638	0	0	Rho_GTPase_activating_protein_11A
ENSG00000214424	0.777421	-0.0369027	0.0969717	0.26514	0.141452	0	0	no_fct
ENSG00000228612	0.775594	0.747231	0.0171635	0.101031	0.0538997	0	0	no_fct
ENSG00000121089	0.774994	1.96887	0.306616	0.524194	0.279656	0	0	NACA_family_member_3_pseudogene
ENSG00000169203	0.773116	-0.182811	0.325359	0.54208	0.289199	0	0	no_fct
ENSG00000237870	0.771879	-0.259487	0.0516455	0.183548	0.0979225	0	0	no_fct
ENSG00000229644	0.771708	0.45333	0.00153065	0.0301821	0.0161021	0	0	nicotinamide_phosphoribosyltransferase-like
ENSG00000138166	0.771617	0.615625	0.0224498	0.116857	0.0623428	0	0	dual_specificity_phosphatase_5
ENSG00000227344	0.770736	0.368018	0.010236	0.0754744	0.0402654	0	0	no_fct
ENSG00000114529	0.770722	0.667347	0.00359783	0.0457131	0.0243878	0	0	chromosome_3_open_reading_frame_52
ENSG00000125968	0.770186	-0.137935	0.00386653	0.0475738	0.0253805	0	0	inhibitor_of_DNA_binding_1,_dominant_negative_helix-loop-helix_protein
ENSG00000172345	0.769086	0.582839	8.36791e-05	0.0100824	0.00537894	0	0	StAR-related_lipid_transfer_(START)_domain_containing_5
ENSG00000254244	0.768901	0.697355	0.0206894	0.111562	0.059518	0	0	no_fct
ENSG00000108387	0.768011	0.0210457	0.0202604	0.109974	0.058671	0	0	septin_4
ENSG00000101680	0.766006	0.608453	0.000215283	0.0145908	0.00778418	0	0	laminin,_alpha_1
ENSG00000123416	0.765836	0.272069	0.000364749	0.0172472	0.00920136	0	0	tubulin,_alpha_1b
ENSG00000253251	0.765334	0.428014	0.0199187	0.108987	0.0581442	0	0	no_fct
ENSG00000242140	0.763805	0.727677	0.0834127	0.241917	0.129062	0	0	no_fct
ENSG00000235587	0.763446	0.559378	0.0572026	0.194531	0.103782	0	0	no_fct
ENSG00000105639	0.762988	-0.2442	0.00358305	0.0457131	0.0243878	0	0	Janus_kinase_3
ENSG00000165949	0.762971	3.52225	0.0143594	0.0917182	0.0489314	0	0	interferon,_alpha-inducible_protein_27
ENSG00000142046	0.762749	-0.145442	0.0103796	0.076	0.0405458	0	0	transmembrane_protein_91
ENSG00000230067	0.762182	0.453633	0.11983	0.301521	0.160861	0	0	no_fct
ENSG00000234764	0.76186	0.00178808	0.0811654	0.237932	0.126936	0	0	no_fct
ENSG00000214765	0.761788	-0.0612406	0.00102555	0.0244718	0.0130557	0	0	septin_7_pseudogene_2
ENSG00000152580	0.761628	-0.144002	0.0196154	0.108055	0.0576473	0	0	immunoglobulin_superfamily,_member_10
ENSG00000220695	0.759371	0.614151	0.0270304	0.129771	0.0692323	0	0	no_fct
ENSG00000144554	0.75846	0.339568	0.00505212	0.0540484	0.0288347	0	0	Fanconi_anemia,_complementation_group_D2
ENSG00000181938	0.758189	0.378196	0.000439727	0.0181696	0.00969344	0	0	GINS_complex_subunit_3_(Psf3_homolog)
ENSG00000160233	0.758124	0.86452	0.00375545	0.047015	0.0250824	0	0	leucine_rich_repeat_containing_3
ENSG00000234106	0.755171	0.774778	0.0914438	0.256352	0.136763	0	0	no_fct
ENSG00000148841	0.755125	0.466593	0.000416371	0.0179723	0.0095882	0	0	inositol_1,4,5-trisphosphate_receptor_interacting_protein
ENSG00000218226	0.755123	0.0324026	7.03942e-05	0.00964985	0.00514817	0	0	no_fct
ENSG00000137267	0.753656	0.342642	0.000294975	0.0161644	0.00862365	0	0	no_fct
ENSG00000253250	0.752894	0.384555	0.00812217	0.0681169	0.0363402	0	0	no_fct
ENSG00000216490	0.751431	1.38745	0.00410712	0.0487794	0.0260237	0	0	interferon,_gamma-inducible_protein_30
ENSG00000165195	0.750972	0.315303	0.0113993	0.0805929	0.0429961	0	0	phosphatidylinositol_glycan_anchor_biosynthesis,_class_A
ENSG00000143256	0.750862	0.48276	0.0218069	0.115019	0.0613623	0	0	prefoldin_subunit_2
ENSG00000100629	0.750468	0.126207	0.00207461	0.0353902	0.0188806	0	0	centrosomal_protein_128kDa
ENSG00000231607	0.749882	0.107016	0.0140597	0.0906356	0.0483539	0	0	deleted_in_lymphocytic_leukemia_2_(non-protein_coding)
ENSG00000180385	0.749304	0.11295	0.000652787	0.0204308	0.0108998	0	0	no_fct
ENSG00000145934	0.749038	-0.32052	0.00160814	0.0311671	0.0166276	0	0	odz,_odd_Oz/ten-m_homolog_2_(Drosophila)
ENSG00000101282	0.746739	0.0176758	0.0211456	0.113069	0.0603218	0	0	R-spondin_4
ENSG00000248905	0.746706	0.16291	0.00140431	0.0288868	0.0154111	0	0	formin_1
ENSG00000023572	0.746413	0.259186	0.00845884	0.0692815	0.0369615	0	0	glutaredoxin_2
ENSG00000165507	0.746401	-1.14311	0.012512	0.0846603	0.0451661	0	0	chromosome_10_open_reading_frame_10
ENSG00000064655	0.746169	-0.183092	0.0701336	0.218401	0.116516	0	0	eyes_absent_homolog_2_(Drosophila)
ENSG00000243710	0.742169	-0.00833237	0.0283511	0.132653	0.0707701	0	0	WD_repeat_domain_65
ENSG00000137135	0.741996	0.206248	0.0102044	0.0753926	0.0402218	0	0	chromosome_9_open_reading_frame_100
ENSG00000173917	0.739055	0.330149	0.00043194	0.0181696	0.00969344	0	0	homeobox_B2
ENSG00000110203	0.738708	0.287489	0.0188698	0.105823	0.0564566	0	0	folate_receptor_3_(gamma)
ENSG00000143476	0.73859	0.466884	0.00933522	0.0726049	0.0387345	0	0	denticleless_homolog_(Drosophila)
ENSG00000100302	0.736482	-0.161458	0.177049	0.378615	0.20199	0	0	RASD_family,_member_2
ENSG00000249264	0.735537	1.47989	0.236004	0.447605	0.238796	0	0	no_fct
ENSG00000145911	0.733913	-0.0391603	0.198024	0.405307	0.21623	0	0	NEDD4_binding_protein_3
ENSG00000183668	0.733789	-0.457968	0.000166273	0.0138373	0.00738219	0	0	pregnancy_specific_beta-1-glycoprotein_9
ENSG00000157570	0.732692	0.568426	0.209268	0.417457	0.222712	0	0	tetraspanin_18
ENSG00000221852	0.732575	-0.182383	0.0273522	0.130341	0.0695364	0	0	keratin_associated_protein_1-5
ENSG00000075702	0.73128	0.48919	0.00377244	0.0470586	0.0251057	0	0	WD_repeat_domain_62
ENSG00000102384	0.73053	0.369319	0.00347642	0.0452058	0.0241172	0	0	centromere_protein_I
ENSG00000236570	0.730207	0.417638	0.110504	0.286382	0.152784	0	0	no_fct
ENSG00000233971	0.73006	2.0719	0.350989	0.565547	0.301718	0	0	no_fct
ENSG00000138642	0.729995	2.63482	0.0218395	0.115086	0.0613979	0	0	hect_domain_and_RLD_6
ENSG00000242208	0.729077	1.1946	0.364806	0.578951	0.308869	0	0	no_fct
ENSG00000127423	0.727204	0.0440002	0.041105	0.161975	0.0864135	0	0	chromosome_1_open_reading_frame_135
ENSG00000163689	0.726901	0.119502	7.58797e-05	0.00964985	0.00514817	0	0	chromosome_3_open_reading_frame_67
ENSG00000189056	0.726547	0.0679517	0.00576511	0.0582798	0.0310921	0	0	reelin
ENSG00000107562	0.725603	-0.321873	0.0134254	0.0883616	0.0471407	0	0	chemokine_(C-X-C_motif)_ligand_12
ENSG00000170801	0.725372	0.0403952	0.0272569	0.130341	0.0695364	0	0	HtrA_serine_peptidase_3
ENSG00000144596	0.72508	2.15728	0.0335518	0.145342	0.0775397	0	0	glutamate_receptor_interacting_protein_2
ENSG00000138160	0.724612	0.247865	0.00687955	0.0633999	0.0338237	0	0	kinesin_family_member_11
ENSG00000123095	0.72334	0.082362	0.0129152	0.0863429	0.0460637	0	0	basic_helix-loop-helix_family,_member_e41
ENSG00000141404	0.722485	-0.120242	0.0436311	0.167663	0.0894477	0	0	guanine_nucleotide_binding_protein_(G_protein),_alpha_activating_activity_polypeptide,_olfactory_type
ENSG00000116771	0.720728	0.0694067	0.00955321	0.0730874	0.038992	0	0	agmatine_ureohydrolase_(agmatinase)
ENSG00000168394	0.71974	1.34578	0.00372472	0.0467497	0.0249409	0	0	transporter_1,_ATP-binding_cassette,_sub-family_B_(MDR/TAP)
ENSG00000169271	0.71871	0.0920705	0.00606954	0.059909	0.0319613	0	0	heat_shock_27kDa_protein_3
ENSG00000104722	0.718383	0.34629	0.0386096	0.156287	0.0833788	0	0	neurofilament,_medium_polypeptide
ENSG00000163545	0.718339	0.347401	0.000586264	0.0199167	0.0106255	0	0	NUAK_family,_SNF1-like_kinase,_2
ENSG00000138798	0.718286	0.62561	0.0169212	0.100286	0.0535026	0	0	epidermal_growth_factor
ENSG00000226784	0.71629	0.251485	0.0202134	0.109776	0.0585654	0	0	phosphoglycerate_mutase_family_member_4
ENSG00000162062	0.716284	0.247917	0.0100452	0.0748556	0.0399353	0	0	chromosome_16_open_reading_frame_59
ENSG00000182185	0.716066	0.519925	0.00759101	0.066361	0.0354034	0	0	RAD51_homolog_B_(S._cerevisiae)
ENSG00000148459	0.714611	0.23829	0.0237311	0.120874	0.0644861	0	0	prenyl_(decaprenyl)_diphosphate_synthase,_subunit_1
ENSG00000254851	0.712263	0.0277931	0.0300261	0.136702	0.0729301	0	0	no_fct
ENSG00000235927	0.710924	0.17484	0.00309195	0.0426667	0.0227626	0	0	no_fct
ENSG00000157734	0.710858	0.227908	0.00586938	0.0588539	0.0313984	0	0	sorting_nexin_22
ENSG00000198814	0.710521	0.0121528	0.00263355	0.039588	0.0211201	0	0	glycerol_kinase
ENSG00000137033	0.710474	-0.0104282	0.217774	0.427583	0.228115	0	0	interleukin_33
ENSG00000105717	0.708419	-0.168628	0.0114023	0.0805929	0.0429961	0	0	pre-B-cell_leukemia_homeobox_4
ENSG00000134986	0.706817	-0.152571	0.00804461	0.0678889	0.0362186	0	0	chromosome_5_open_reading_frame_13
ENSG00000078018	0.706237	0.578292	0.0091964	0.0721428	0.038488	0	0	microtubule-associated_protein_2
ENSG00000128228	0.704329	0.255105	0.00224926	0.0371428	0.0198156	0	0	stromal_cell-derived_factor_2-like_1
ENSG00000197142	0.703757	0.626958	0.0101463	0.0753039	0.0401745	0	0	acyl-CoA_synthetase_long-chain_family_member_5
ENSG00000151883	0.702243	0.495241	0.00411975	0.0488328	0.0260522	0	0	poly_(ADP-ribose)_polymerase_family,_member_8
ENSG00000166923	0.700885	-0.0203965	0.000313456	0.0165267	0.00881695	0	0	gremlin_1
ENSG00000089472	0.700785	0.351524	0.010702	0.0772835	0.0412306	0	0	hephaestin
ENSG00000125148	0.700093	0.320583	0.000554135	0.0197257	0.0105236	0	0	metallothionein_2A
ENSG00000140534	0.700088	0.246867	0.000439354	0.0181696	0.00969344	0	0	chromosome_15_open_reading_frame_42
ENSG00000164591	0.699151	0.0462431	0.0122872	0.0839894	0.0448082	0	0	myozenin_3
ENSG00000100036	0.698339	0.108835	0.00622805	0.0603291	0.0321854	0	0	solute_carrier_family_35,_member_E4
ENSG00000217060	0.698144	0.101528	0.121067	0.303027	0.161664	0	0	no_fct
ENSG00000003987	0.698018	-0.232927	0.00368189	0.0464082	0.0247587	0	0	myotubularin_related_protein_7
ENSG00000145194	0.697784	0.441422	0.00102459	0.0244718	0.0130557	0	0	endothelin_converting_enzyme_2
ENSG00000112877	0.696807	0.46318	0.000956349	0.0236943	0.0126409	0	0	centrosomal_protein_72kDa
ENSG00000126709	0.696774	3.09915	0.0228969	0.118014	0.0629604	0	0	interferon,_alpha-inducible_protein_6
ENSG00000168496	0.696591	0.456349	0.00525965	0.0551796	0.0294382	0	0	flap_structure-specific_endonuclease_1
ENSG00000124212	0.696099	-0.240391	0.0028794	0.041248	0.0220057	0	0	prostaglandin_I2_(prostacyclin)_synthase
ENSG00000168811	0.692196	0.565074	0.000552416	0.0197257	0.0105236	0	0	interleukin_12A_(natural_killer_cell_stimulatory_factor_1,_cytotoxic_lymphocyte_maturation_factor_1,_p35)
ENSG00000232977	0.692144	-0.0645421	0.000716447	0.0212059	0.0113133	0	0	no_fct
ENSG00000111206	0.691556	0.273187	0.00124052	0.0274574	0.0146485	0	0	forkhead_box_M1
ENSG00000225462	0.688087	1.64099	0.287853	0.504507	0.269153	0	0	no_fct
ENSG00000051180	0.68784	0.609237	0.00292376	0.0416253	0.022207	0	0	RAD51_homolog_(S._cerevisiae)
ENSG00000175592	0.687711	0.493134	0.00104547	0.0248305	0.013247	0	0	FOS-like_antigen_1
ENSG00000230453	0.687352	-0.315606	0.0650198	0.209415	0.111722	0	0	ankyrin_repeat_domain_18B
ENSG00000100479	0.687224	0.428571	0.0453062	0.17093	0.0911906	0	0	polymerase_(DNA_directed),_epsilon_2_(p59_subunit)
ENSG00000174194	0.687032	-0.182025	0.0752506	0.227999	0.121637	0	0	ArfGAP_with_GTPase_domain,_ankyrin_repeat_and_PH_domain_8
ENSG00000121316	0.686784	0.258815	0.0277721	0.131146	0.069966	0	0	phospholipase_B_domain_containing_1
ENSG00000072041	0.686651	1.07766	0.100909	0.271218	0.144694	0	0	solute_carrier_family_6_(neutral_amino_acid_transporter),_member_15
ENSG00000233488	0.685821	0.0920193	0.0153181	0.0950608	0.0507147	0	0	Uncharacterized_protein
ENSG00000096060	0.685428	0.255881	0.00385329	0.0475725	0.0253798	0	0	FK506_binding_protein_5
ENSG00000164087	0.685055	0.27409	0.000259754	0.0155959	0.00832036	0	0	POC1_centriolar_protein_homolog_A_(Chlamydomonas)
ENSG00000235916	0.684338	0.483536	0.0693025	0.217086	0.115815	0	0	no_fct
ENSG00000129173	0.682482	0.551583	0.0872897	0.248651	0.132655	0	0	E2F_transcription_factor_8
ENSG00000230793	0.681824	0.521392	0.0713024	0.220348	0.117555	0	0	no_fct
ENSG00000132185	0.681794	0.295769	0.0258613	0.126405	0.0674369	0	0	Fc_receptor-like_A
ENSG00000228035	0.679711	0.889771	0.172281	0.372685	0.198827	0	0	no_fct
ENSG00000230568	0.678784	0.440067	0.0654012	0.209931	0.111998	0	0	no_fct
ENSG00000077150	0.678563	0.165408	0.000349056	0.0168748	0.00900269	0	0	nuclear_factor_of_kappa_light_polypeptide_gene_enhancer_in_B-cells_2_(p49/p100)
ENSG00000196550	0.67777	0.24217	0.015137	0.0945101	0.0504209	0	0	family_with_sequence_similarity_72,_member_A
ENSG00000137310	0.677384	0.291037	0.000389745	0.0175326	0.00935359	0	0	transcription_factor_19
ENSG00000105988	0.677094	0.332142	0.0531372	0.186774	0.0996434	0	0	no_fct
ENSG00000135318	0.676293	0.780874	0.000133794	0.0120743	0.00644162	0	0	5'-nucleotidase,_ecto_(CD73)
ENSG00000144355	0.674397	0.105729	0.174731	0.376048	0.200621	0	0	distal-less_homeobox_1
ENSG00000170727	0.673202	0.161313	0.0145926	0.0927247	0.0494684	0	0	block_of_proliferation_1
ENSG00000234432	0.673	-0.164478	0.0483517	0.177326	0.0946029	0	0	Uncharacterized_proteincDNA_FLJ43318_fis,_clone_NT2RI2018311
ENSG00000125885	0.672966	0.28241	0.00487329	0.0529048	0.0282246	0	0	minichromosome_maintenance_complex_component_8
ENSG00000164283	0.672725	0.582589	0.0435467	0.167436	0.0893269	0	0	endothelial_cell-specific_molecule_1
ENSG00000121211	0.671617	0.3911	0.0597996	0.199694	0.106536	0	0	meiotic_nuclear_divisions_1_homolog_(S._cerevisiae)
ENSG00000101003	0.671266	0.564098	0.00852504	0.069514	0.0370856	0	0	GINS_complex_subunit_1_(Psf1_homolog)
ENSG00000165105	0.670795	0.294209	0.00794461	0.0676597	0.0360963	0	0	RAS_and_EF-hand_domain_containing
ENSG00000163006	0.67013	0.206602	0.00410342	0.0487794	0.0260237	0	0	coiled-coil_domain_containing_138
ENSG00000183691	0.670068	0.267464	0.00444326	0.0505104	0.0269472	0	0	noggin
ENSG00000117676	0.669767	0.14899	0.011269	0.0801196	0.0427436	0	0	ribosomal_protein_S6_kinase,_90kDa,_polypeptide_1
ENSG00000172201	0.669547	-0.0787078	0.0567361	0.19364	0.103307	0	0	inhibitor_of_DNA_binding_4,_dominant_negative_helix-loop-helix_protein
ENSG00000170873	0.669157	0.378703	0.000876118	0.0228505	0.0121907	0	0	metastasis_suppressor_1
ENSG00000184635	0.668873	0.609152	0.0478063	0.176072	0.0939338	0	0	zinc_finger_protein_93
ENSG00000164647	0.668116	0.119186	0.00285701	0.041091	0.0219219	0	0	six_transmembrane_epithelial_antigen_of_the_prostate_1
ENSG00000169330	0.666248	0.184134	0.00177721	0.032884	0.0175436	0	0	KIAA1024
ENSG00000162390	0.666017	0.0231399	0.00128524	0.0278028	0.0148327	0	0	acyl-CoA_thioesterase_11
ENSG00000188313	0.665366	1.76554	0.00250237	0.0387096	0.0206515	0	0	phospholipid_scramblase_1
ENSG00000135439	0.664991	0.171914	0.166846	0.366089	0.195307	0	0	ArfGAP_with_GTPase_domain,_ankyrin_repeat_and_PH_domain_2
ENSG00000161692	0.664857	0.487599	0.000332158	0.0165628	0.00883624	0	0	DBF4_homolog_B_(S._cerevisiae)
ENSG00000133119	0.663882	0.253112	0.0117503	0.0819181	0.0437031	0	0	replication_factor_C_(activator_1)_3,_38kDa
ENSG00000172780	0.663374	0.729003	0.0552967	0.190897	0.101843	0	0	RAB43,_member_RAS_oncogene_family
ENSG00000113356	0.661933	0.213258	0.00916887	0.0721428	0.038488	0	0	polymerase_(RNA)_III_(DNA_directed)_polypeptide_G_(32kD)
ENSG00000149503	0.661917	0.273637	0.004172	0.0490525	0.0261694	0	0	inner_centromere_protein_antigens_135/155kDa
ENSG00000064932	0.661558	-0.0101261	0.017907	0.102976	0.0549372	0	0	strawberry_notch_homolog_2_(Drosophila)
ENSG00000109534	0.661153	0.256573	0.00135578	0.0284907	0.0151997	0	0	GAR1_ribonucleoprotein_homolog_(yeast)
ENSG00000136275	0.660671	-0.871632	0.12658	0.311944	0.166422	0	0	chromosome_7_open_reading_frame_69
ENSG00000204267	0.660155	1.08888	0.00463824	0.0517667	0.0276174	0	0	transporter_2,_ATP-binding_cassette,_sub-family_B_(MDR/TAP)
ENSG00000146674	0.660093	-0.300398	0.00592307	0.0592245	0.0315961	0	0	insulin-like_growth_factor_binding_protein_3
ENSG00000168038	0.660006	0.282925	0.00173273	0.0324328	0.0173028	0	0	unc-51-like_kinase_4_(C._elegans)
ENSG00000214012	0.659762	0.0577292	0.392506	0.603888	0.322173	0	0	no_fct
ENSG00000229657	0.659698	-0.211272	0.0832943	0.241811	0.129006	0	0	no_fct
ENSG00000240787	0.659616	-0.0672555	0.216466	0.426152	0.227351	0	0	no_fct
ENSG00000167553	0.658532	0.209001	0.000686945	0.0209039	0.0111522	0	0	tubulin,_alpha_1c
ENSG00000122862	0.658395	-0.102984	0.0311345	0.139289	0.0743105	0	0	serglycin
ENSG00000174945	0.65774	-0.179325	0.00702229	0.063843	0.0340601	0	0	archaelysin_family_metallopeptidase_1
ENSG00000212232	0.657438	-0.0311165	0.0155915	0.0956428	0.0510252	0	0	small_nucleolar_RNA,_C/D_box_17
ENSG00000187134	0.656277	0.23691	0.0665365	0.211736	0.112961	0	0	aldo-keto_reductase_family_1,_member_C1_(dihydrodiol_dehydrogenase_1;_20-alpha_(3-alpha)-hydroxysteroid_dehydrogenase)
ENSG00000139180	0.655158	0.513014	0.000254426	0.0155634	0.00830303	0	0	NADH_dehydrogenase_(ubiquinone)_1_alpha_subcomplex,_9,_39kDa
ENSG00000136514	0.655127	1.78306	0.00612944	0.0600241	0.0320227	0	0	receptor_(chemosensory)_transporter_protein_4
ENSG00000214783	0.654789	0.0448275	0.128538	0.314922	0.16801	0	0	polymerase_(RNA)_II_(DNA_directed)_polypeptide_J4,_pseudogene
ENSG00000255121	0.654494	-0.26352	0.00633939	0.0604836	0.0322679	0	0	no_fct
ENSG00000250233	0.653518	0.260917	0.042851	0.165704	0.0884028	0	0	no_fct
ENSG00000165685	0.651446	-0.429041	0.0231276	0.118872	0.0634182	0	0	chromosome_12_open_reading_frame_59
ENSG00000213406	0.650542	0.398071	0.129938	0.316664	0.168939	0	0	no_fct
ENSG00000106785	0.650266	1.36241	0.006419	0.0609184	0.0324998	0	0	tripartite_motif_containing_14
ENSG00000176845	0.650189	0.142576	0.0254098	0.125453	0.0669289	0	0	meteorin,_glial_cell_differentiation_regulator-like
ENSG00000125347	0.650083	0.752829	0.000327769	0.0165439	0.00882613	0	0	interferon_regulatory_factor_1
ENSG00000249430	0.650032	-0.263964	0.04266	0.165338	0.0882076	0	0	no_fct
ENSG00000167642	0.649741	0.199258	0.0284012	0.132756	0.0708251	0	0	serine_peptidase_inhibitor,_Kunitz_type,_2
ENSG00000198691	0.649675	-0.195345	0.146217	0.338558	0.18062	0	0	ATP-binding_cassette,_sub-family_A_(ABC1),_member_4
ENSG00000104147	0.649617	0.378777	0.0910616	0.255602	0.136363	0	0	Opa_interacting_protein_5
ENSG00000163874	0.649383	0.321004	0.00410861	0.0487794	0.0260237	0	0	zinc_finger_CCCH-type_containing_12A
ENSG00000100285	0.649378	0.089005	0.0213438	0.113798	0.0607108	0	0	neurofilament,_heavy_polypeptide
ENSG00000248641	0.648552	0.501142	0.124793	0.30931	0.165016	0	0	no_fct
ENSG00000184551	0.647431	0.0155788	0.0142288	0.0912408	0.0486767	0	0	no_fct
ENSG00000004864	0.647364	0.470248	0.00236269	0.0380404	0.0202945	0	0	solute_carrier_family_25,_member_13_(citrin)
ENSG00000216775	0.647337	-0.190193	0.013114	0.0871697	0.0465048	0	0	no_fct
ENSG00000117266	0.646914	1.10214	0.0253781	0.125399	0.0669	0	0	cyclin-dependent_kinase_18
ENSG00000166741	0.646794	-0.0932452	1.45528e-05	0.00578573	0.00308667	0	0	nicotinamide_N-methyltransferase
ENSG00000243696	0.646657	0.548399	0.00847881	0.0692908	0.0369665	0	0	musculoskeletal,_embryonic_nuclear_protein_1
ENSG00000137573	0.646017	-0.32099	0.000430644	0.0181696	0.00969344	0	0	sulfatase_1
ENSG00000154146	0.645753	0.00885055	0.0303879	0.137202	0.0731972	0	0	neurogranin_(protein_kinase_C_substrate,_RC3)
ENSG00000198211	0.644714	0.0359722	0.0127208	0.0854834	0.0456052	0	0	no_fct
ENSG00000197355	0.643988	0.332249	0.0110137	0.0788376	0.0420597	0	0	UDP-N-acteylglucosamine_pyrophosphorylase_1-like_1
ENSG00000250526	0.643863	0.891479	0.421521	0.629501	0.335837	0	0	no_fct
ENSG00000079385	0.643559	1.57216	0.402978	0.613073	0.327073	0	0	carcinoembryonic_antigen-related_cell_adhesion_molecule_1_(biliary_glycoprotein)
ENSG00000131795	0.643001	0.233124	0.00108279	0.0255253	0.0136177	0	0	RNA_binding_motif_protein_8A
ENSG00000100906	0.642445	0.238878	0.00223635	0.0371428	0.0198156	0	0	nuclear_factor_of_kappa_light_polypeptide_gene_enhancer_in_B-cells_inhibitor,_alpha
ENSG00000048162	0.642165	0.230737	0.000210277	0.014551	0.00776295	0	0	NOP16_nucleolar_protein_homolog_(yeast)
ENSG00000114270	0.640586	-0.0138547	0.00758923	0.066361	0.0354034	0	0	collagen,_type_VII,_alpha_1
ENSG00000136630	0.640073	0.210404	0.00217768	0.0364847	0.0194645	0	0	H2.0-like_homeobox
ENSG00000233229	0.639409	0.912342	0.203163	0.410737	0.219128	0	0	no_fct
ENSG00000245556	0.639233	0.730002	0.0138558	0.0901001	0.0480682	0	0	no_fct
ENSG00000119705	0.638497	0.0703003	0.0010185	0.0244579	0.0130483	0	0	SRA_stem-loop_interacting_RNA_binding_protein
ENSG00000184831	0.638425	0.457223	0.00567908	0.0578126	0.0308429	0	0	apolipoprotein_O
ENSG00000131351	0.638334	0.24067	0.0030599	0.0424233	0.0226327	0	0	HAUS_augmin-like_complex,_subunit_8
ENSG00000226086	0.638149	0.878664	0.212434	0.42147	0.224853	0	0	no_fct
ENSG00000143333	0.637774	-0.186963	0.0787316	0.233744	0.124702	0	0	regulator_of_G-protein_signaling_16
ENSG00000160606	0.637282	-0.103244	0.00261021	0.0395244	0.0210862	0	0	TLC_domain_containing_1
ENSG00000241990	0.637201	0.228356	0.00111114	0.0259855	0.0138632	0	0	no_fct
ENSG00000146232	0.636318	0.179745	0.00165335	0.0316595	0.0168903	0	0	nuclear_factor_of_kappa_light_polypeptide_gene_enhancer_in_B-cells_inhibitor,_epsilon
ENSG00000131470	0.635738	0.350574	0.0173007	0.101675	0.0542435	0	0	PSMC3_interacting_protein
ENSG00000105132	0.635558	-0.0898627	0.162668	0.361021	0.192604	0	0	no_fct
ENSG00000077152	0.635163	0.438688	0.0245938	0.12322	0.0657376	0	0	ubiquitin-conjugating_enzyme_E2T_(putative)
ENSG00000205771	0.634784	-0.174863	0.016853	0.100003	0.0533513	0	0	no_fct
ENSG00000181544	0.633548	0.115709	0.0154189	0.0951259	0.0507494	0	0	Fanconi_anemia,_complementation_group_B
ENSG00000106483	0.633154	-0.567636	0.153053	0.348086	0.185703	0	0	secreted_frizzled-related_protein_4
ENSG00000188229	0.633029	0.211513	0.00195056	0.0344451	0.0183764	0	0	tubulin,_beta_2C
ENSG00000187498	0.632676	0.0776142	0.00352905	0.0453778	0.0242089	0	0	collagen,_type_IV,_alpha_1
ENSG00000186638	0.631687	0.437587	0.0265103	0.128321	0.0684589	0	0	kinesin_family_member_24
ENSG00000228766	0.631659	-0.0305323	0.0174134	0.101813	0.0543168	0	0	no_fct
ENSG00000171621	0.631155	0.426469	0.00265952	0.0397174	0.0211891	0	0	splA/ryanodine_receptor_domain_and_SOCS_box_containing_1
ENSG00000172061	0.630049	0.213012	0.00125148	0.0274888	0.0146652	0	0	leucine_rich_repeat_containing_15
ENSG00000242814	0.629503	1.44177	0.304797	0.522194	0.278589	0	0	no_fct
ENSG00000128335	0.629447	0.841498	0.000980761	0.024005	0.0128066	0	0	apolipoprotein_L,_2
ENSG00000150048	0.629277	0.184832	0.139557	0.330099	0.176107	0	0	C-type_lectin_domain_family_1,_member_A
ENSG00000227347	0.629177	0.417477	0.0652743	0.209829	0.111943	0	0	no_fct
ENSG00000104356	0.62689	0.0203554	0.000741236	0.0215912	0.0115189	0	0	processing_of_precursor_1,_ribonuclease_P/MRP_subunit_(S._cerevisiae)
ENSG00000182481	0.62638	0.211289	0.00370471	0.046578	0.0248493	0	0	karyopherin_alpha_2_(RAG_cohort_1,_importin_alpha_1)
ENSG00000196196	0.626293	-0.055543	0.015665	0.0959867	0.0512087	0	0	histidine_rich_carboxyl_terminus_1
ENSG00000237276	0.625931	0.98331	0.0663993	0.211506	0.112838	0	0	no_fct
ENSG00000227304	0.625666	1.66167	0.482834	0.680771	0.36319	0	0	no_fct
ENSG00000115844	0.625287	-0.155284	0.343741	0.559402	0.29844	0	0	distal-less_homeobox_2
ENSG00000132481	0.624484	0.100729	0.0466921	0.17406	0.0928607	0	0	tripartite_motif_containing_47
ENSG00000238271	0.623577	0.14899	0.00550991	0.0566393	0.0302169	0	0	no_fct
ENSG00000167034	0.622971	0.496345	0.0135342	0.0888388	0.0473953	0	0	NK3_homeobox_1
ENSG00000129911	0.622035	0.268306	0.00723257	0.0646859	0.0345098	0	0	Kruppel-like_factor_16
ENSG00000118515	0.62199	0.241165	0.0102579	0.0755395	0.0403002	0	0	serum/glucocorticoid_regulated_kinase_1
ENSG00000141378	0.621634	0.361103	0.000209826	0.014551	0.00776295	0	0	peptidyl-tRNA_hydrolase_2
ENSG00000231458	0.621207	0.655964	0.00881897	0.0706575	0.0376956	0	0	no_fct
ENSG00000163002	0.621201	0.488886	0.000910106	0.0233641	0.0124647	0	0	nucleoporin_35kDa
ENSG00000231609	0.620085	-0.359293	0.0772993	0.231583	0.123549	0	0	no_fct
ENSG00000174109	0.619991	0.289944	0.00394964	0.0479367	0.0255741	0	0	chromosome_16_open_reading_frame_91
ENSG00000099625	0.619717	0.0246995	0.0286419	0.133379	0.0711577	0	0	chromosome_19_open_reading_frame_26
ENSG00000075131	0.619683	0.376293	0.00722433	0.0646859	0.0345098	0	0	TIMELESS_interacting_protein
ENSG00000186354	0.619484	0.288613	0.00964027	0.073328	0.0391203	0	0	chromosome_9_open_reading_frame_47
ENSG00000144158	0.619283	0.10833	0.002949	0.0417156	0.0222552	0	0	no_fct
ENSG00000163319	0.618997	0.385484	0.000785929	0.022021	0.0117481	0	0	mitochondrial_ribosomal_protein_S18C
ENSG00000237794	0.618971	0.221546	0.00385002	0.0475725	0.0253798	0	0	no_fct
ENSG00000121068	0.6188	0.170651	0.023283	0.119419	0.0637095	0	0	T-box_2
ENSG00000117318	0.617489	-0.152832	0.0008164	0.022322	0.0119087	0	0	inhibitor_of_DNA_binding_3,_dominant_negative_helix-loop-helix_protein
ENSG00000095637	0.616852	0.767797	0.289755	0.506657	0.270301	0	0	sorbin_and_SH3_domain_containing_1
ENSG00000236753	0.616604	-0.131477	0.00506421	0.0540566	0.0288391	0	0	no_fct
ENSG00000160886	0.616439	0.190948	0.0292425	0.134893	0.0719652	0	0	lymphocyte_antigen_6_complex,_locus_K
ENSG00000212724	0.615889	-0.0957797	0.209815	0.418146	0.22308	0	0	keratin_associated_protein_2-3
ENSG00000141664	0.615413	0.756926	0.00647581	0.0612205	0.032661	0	0	zinc_finger,_CCHC_domain_containing_2
ENSG00000118939	0.615282	0.237455	0.000210824	0.014551	0.00776295	0	0	ubiquitin_carboxyl-terminal_esterase_L3_(ubiquitin_thiolesterase)
ENSG00000135525	0.615235	0.201127	0.0649411	0.2094	0.111715	0	0	microtubule-associated_protein_7
ENSG00000196754	0.61486	0.88425	0.261721	0.475475	0.253665	0	0	S100_calcium_binding_protein_A2
ENSG00000174442	0.614061	0.285633	0.00504976	0.0540484	0.0288347	0	0	Zwilch,_kinetochore_associated,_homolog_(Drosophila)
ENSG00000090530	0.613903	0.237036	0.00134135	0.0284907	0.0151997	0	0	leprecan-like_1
ENSG00000113460	0.613109	0.169015	0.0226512	0.117336	0.0625982	0	0	BRX1,_biogenesis_of_ribosomes,_homolog_(S._cerevisiae)
ENSG00000120833	0.613043	-0.146279	0.00300451	0.0419321	0.0223707	0	0	suppressor_of_cytokine_signaling_2
ENSG00000183814	0.612922	0.448718	0.0463315	0.173419	0.0925186	0	0	lin-9_homolog_(C._elegans)
ENSG00000112312	0.612337	0.496666	0.0111193	0.0794391	0.0423806	0	0	geminin,_DNA_replication_inhibitor
ENSG00000101347	0.612158	1.71287	0.00506758	0.0540566	0.0288391	0	0	SAM_domain_and_HD_domain_1
ENSG00000123473	0.611911	0.48263	0.0160819	0.0974497	0.0519892	0	0	SCL/TAL1_interrupting_locus
ENSG00000197358	0.611733	0.371433	0.00524333	0.0551057	0.0293988	0	0	BCL2/adenovirus_E1B_19kDa_interacting_protein_3_pseudogene_1
ENSG00000233901	0.610233	-0.788213	0.0760317	0.229186	0.12227	0	0	no_fct
ENSG00000180875	0.610205	-0.450801	0.0447405	0.169665	0.0905161	0	0	gremlin_2
ENSG00000182107	0.609946	0.192514	0.0841639	0.243196	0.129745	0	0	transmembrane_protein_30B
ENSG00000214826	0.609489	0.110906	0.00769308	0.0667543	0.0356133	0	0	DEAD/H_(Asp-Glu-Ala-Asp/His)_box_polypeptide_12
ENSG00000096696	0.608809	0.506562	0.00487164	0.0529048	0.0282246	0	0	desmoplakin
ENSG00000182809	0.608784	0.342106	0.0616291	0.203448	0.108539	0	0	cysteine-rich_protein_2
ENSG00000102524	0.608013	2.0704	0.203078	0.410735	0.219126	0	0	tumor_necrosis_factor_(ligand)_superfamily,_member_13b
ENSG00000138623	0.60799	0.160601	0.00458707	0.0513829	0.0274127	0	0	semaphorin_7A,_GPI_membrane_anchor_(John_Milton_Hagen_blood_group)
ENSG00000224713	0.607848	-0.0285508	0.0239861	0.121668	0.0649093	0	0	no_fct
ENSG00000196639	0.607675	-0.00646126	0.0021992	0.0366529	0.0195542	0	0	histamine_receptor_H1
ENSG00000159055	0.606377	0.0401723	0.000563859	0.019816	0.0105718	0	0	MIS18_kinetochore_protein_homolog_A_(S._pombe)
ENSG00000127586	0.605933	0.200644	0.018382	0.104544	0.0557738	0	0	CTF18,_chromosome_transmission_fidelity_factor_18_homolog_(S._cerevisiae)
ENSG00000104889	0.605477	0.338154	0.00160505	0.0311668	0.0166274	0	0	ribonuclease_H2,_subunit_A
ENSG00000197646	0.605472	0.585141	0.0119726	0.0828003	0.0441738	0	0	programmed_cell_death_1_ligand_2
ENSG00000118785	0.605216	1.83711	0.301608	0.518806	0.276782	0	0	secreted_phosphoprotein_1
ENSG00000227203	0.60476	1.19596	0.349674	0.565009	0.301431	0	0	SUB1_homolog_(S._cerevisiae)_pseudogene_1
ENSG00000152422	0.604342	0.400277	0.00332219	0.0444672	0.0237231	0	0	X-ray_repair_complementing_defective_repair_in_Chinese_hamster_cells_4
ENSG00000101898	0.604211	0.176456	0.00990456	0.0742589	0.039617	0	0	no_fct
ENSG00000067992	0.604189	0.255408	0.0732962	0.224401	0.119717	0	0	pyruvate_dehydrogenase_kinase,_isozyme_3
ENSG00000230693	0.603845	-0.0378543	0.0278593	0.13135	0.0700747	0	0	no_fct
ENSG00000255090	0.603738	-0.0876035	0.00187041	0.0337206	0.0179899	0	0	no_fct
ENSG00000161638	0.60338	0.263796	0.000144697	0.0126696	0.00675918	0	0	integrin,_alpha_5_(fibronectin_receptor,_alpha_polypeptide)
ENSG00000147536	0.602803	0.0862149	0.0125315	0.084753	0.0452155	0	0	GINS_complex_subunit_4_(Sld5_homolog)
ENSG00000105835	0.602593	0.502619	0.00770168	0.0667543	0.0356133	0	0	nicotinamide_phosphoribosyltransferase
ENSG00000164105	0.602387	0.367085	0.00506614	0.0540566	0.0288391	0	0	Sin3A-associated_protein,_30kDa
ENSG00000105499	0.602054	-0.0930593	0.00435372	0.0498856	0.0266138	0	0	phospholipase_A2,_group_IVC_(cytosolic,_calcium-independent)
ENSG00000244274	0.601735	0.0172893	0.0552736	0.190873	0.10183	0	0	dysbindin_(dystrobrevin_binding_protein_1)_domain_containing_2
ENSG00000102349	0.601423	0.319938	0.00779784	0.0670699	0.0357816	0	0	Kruppel-like_factor_8
ENSG00000174136	0.601061	0.254834	2.14939e-05	0.00619444	0.00330472	0	0	RGM_domain_family,_member_B
ENSG00000151849	0.60004	0.252038	0.0058259	0.0586176	0.0312724	0	0	centromere_protein_J
ENSG00000256211	0.599921	0.425227	0.155883	0.351963	0.187772	0	0	no_fct
ENSG00000152749	0.599914	0.732795	0.0199443	0.108987	0.0581442	0	0	G_protein-coupled_receptor_180
ENSG00000002549	0.599882	1.36721	0.0182491	0.10425	0.0556173	0	0	leucine_aminopeptidase_3
ENSG00000176435	0.599784	0.106576	0.0630315	0.205763	0.109774	0	0	C-type_lectin_domain_family_14,_member_A
ENSG00000243444	0.599449	-0.0948193	0.00403518	0.0484552	0.0258507	0	0	paralemmin_2
ENSG00000099337	0.599082	0.0537654	0.000476339	0.0185949	0.00992032	0	0	potassium_channel,_subfamily_K,_member_6
ENSG00000178127	0.598706	0.149154	0.00536061	0.0556489	0.0296886	0	0	NADH_dehydrogenase_(ubiquinone)_flavoprotein_2,_24kDa
ENSG00000170379	0.598471	0.247494	0.000385352	0.0174416	0.00930507	0	0	family_with_sequence_similarity_115,_member_C
ENSG00000227741	0.597718	0.0767707	0.0103025	0.0757748	0.0404257	0	0	no_fct
ENSG00000181284	0.597306	0.281649	0.0106918	0.0772835	0.0412306	0	0	transmembrane_protein_102
ENSG00000154654	0.596916	-0.0166903	0.0263686	0.127845	0.0682051	0	0	neural_cell_adhesion_molecule_2
ENSG00000166451	0.596741	0.392361	0.0160262	0.097335	0.051928	0	0	centromere_protein_N
ENSG00000171793	0.596566	0.252001	0.000496028	0.0187573	0.010007	0	0	CTP_synthase
ENSG00000163814	0.596061	0.416162	0.00280658	0.040755	0.0217427	0	0	CUB_domain_containing_protein_1
ENSG00000231007	0.596016	0.169003	0.06949	0.217268	0.115912	0	0	cell_division_cycle_20_homolog_(S._cerevisiae)_pseudogene_1
ENSG00000134802	0.595864	0.370034	0.00133236	0.0284044	0.0151537	0	0	solute_carrier_family_43,_member_3
ENSG00000187583	0.594804	0.491189	0.077386	0.23167	0.123595	0	0	pleckstrin_homology_domain_containing,_family_N_member_1
ENSG00000041353	0.593549	0.363976	0.0489976	0.17867	0.09532	0	0	RAB27B,_member_RAS_oncogene_family
ENSG00000184599	0.591846	-0.360616	0.244817	0.456907	0.243759	0	0	family_with_sequence_similarity_19_(chemokine_(C-C_motif)-like),_member_A3
ENSG00000234518	0.591092	0.424799	0.0265263	0.128356	0.0684775	0	0	no_fct
ENSG00000137842	0.591083	0.814289	0.00623763	0.0603586	0.0322012	0	0	transmembrane_protein_62
ENSG00000164045	0.591067	0.446735	0.0101595	0.0753049	0.040175	0	0	cell_division_cycle_25_homolog_A_(S._pombe)
ENSG00000135899	0.591066	1.42384	0.0247605	0.123579	0.0659289	0	0	SP110_nuclear_body_protein
ENSG00000127399	0.59	0.0595607	0.0357262	0.150109	0.080083	0	0	leucine_rich_repeat_containing_61
ENSG00000234745	0.589854	0.750112	0.00728984	0.0648392	0.0345916	0	0	major_histocompatibility_complex,_class_I,_B
ENSG00000104881	0.589202	0.240289	0.0300474	0.136702	0.0729301	0	0	protein_phosphatase_1,_regulatory_(inhibitor)_subunit_13_like
ENSG00000127191	0.588702	0.201517	0.00297649	0.0418587	0.0223315	0	0	TNF_receptor-associated_factor_2
ENSG00000006283	0.588673	0.0479028	0.365662	0.579685	0.309261	0	0	calcium_channel,_voltage-dependent,_T_type,_alpha_1G_subunit
ENSG00000023330	0.588255	0.296606	0.000378675	0.017289	0.00922362	0	0	aminolevulinate,_delta-,_synthase_1
ENSG00000163083	0.58809	-0.00722586	0.00645816	0.0611716	0.0326349	0	0	inhibin,_beta_B
ENSG00000223722	0.58731	1.43378	0.160703	0.358608	0.191317	0	0	no_fct
ENSG00000085840	0.586253	0.842758	0.018574	0.104965	0.0559986	0	0	origin_recognition_complex,_subunit_1
ENSG00000138092	0.586241	0.277087	0.00287979	0.041248	0.0220057	0	0	centromere_protein_O
ENSG00000101425	0.58312	0.0170764	0.159919	0.357495	0.190723	0	0	bactericidal/permeability-increasing_protein
ENSG00000127328	0.582358	0.978557	0.234841	0.446263	0.23808	0	0	RAB3A_interacting_protein_(rabin3)
ENSG00000110218	0.582299	0.367056	0.00714994	0.0644428	0.0343801	0	0	pannexin_1
ENSG00000136108	0.581843	0.19467	0.013423	0.0883616	0.0471407	0	0	cytoskeleton_associated_protein_2
ENSG00000168273	0.581794	0.116451	7.42243e-05	0.00964985	0.00514817	0	0	no_fct
ENSG00000237828	0.581287	0.347	0.0938153	0.259989	0.138704	0	0	no_fct
ENSG00000255397	0.580891	0.470201	0.198882	0.406367	0.216796	0	0	no_fct
ENSG00000177197	0.580588	0.126239	0.0868968	0.248012	0.132314	0	0	no_fct
ENSG00000184441	0.580431	0.348307	0.00237425	0.0380404	0.0202945	0	0	no_fct
ENSG00000173083	0.580193	0.485559	0.00626488	0.0604305	0.0322395	0	0	heparanase
ENSG00000168386	0.579585	0.00375933	0.0508433	0.182063	0.0971304	0	0	filamin_A_interacting_protein_1-like
ENSG00000214391	0.579501	0.74567	0.255909	0.468922	0.250169	0	0	no_fct
ENSG00000100564	0.579211	0.225618	0.00135498	0.0284907	0.0151997	0	0	phosphatidylinositol_glycan_anchor_biosynthesis,_class_H
ENSG00000213626	0.578998	-0.147676	0.00468863	0.0520168	0.0277509	0	0	limb_bud_and_heart_development_homolog_(mouse)
ENSG00000185774	0.578314	-0.171816	0.00280015	0.0407421	0.0217358	0	0	Kv_channel_interacting_protein_4
ENSG00000226650	0.577523	0.744251	0.143975	0.335319	0.178892	0	0	no_fct
ENSG00000164211	0.576942	0.65913	0.00345654	0.0450361	0.0240267	0	0	StAR-related_lipid_transfer_(START)_domain_containing_4
ENSG00000095380	0.576285	0.207026	2.31607e-05	0.00619444	0.00330472	0	0	N-acetylneuraminic_acid_synthase
ENSG00000061656	0.576229	0.153267	0.00771859	0.0667543	0.0356133	0	0	sperm_associated_antigen_4
ENSG00000176678	0.575624	0.148726	0.00790653	0.0676586	0.0360957	0	0	forkhead_box_L1
ENSG00000133816	0.574996	-0.0295082	0.00149938	0.029882	0.015942	0	0	microtubule_associated_monoxygenase,_calponin_and_LIM_domain_containing_2
ENSG00000213199	0.574614	0.28095	0.0288073	0.133973	0.0714742	0	0	amiloride-sensitive_cation_channel_3
ENSG00000100297	0.574438	0.234968	0.0138736	0.0901001	0.0480682	0	0	minichromosome_maintenance_complex_component_5
ENSG00000178053	0.574029	0.0477323	0.00770813	0.0667543	0.0356133	0	0	myeloid_leukemia_factor_1
ENSG00000140987	0.573728	-0.0810377	0.0125663	0.0849104	0.0452995	0	0	zinc_finger_protein_434
ENSG00000242013	0.573185	0.0512404	0.000906755	0.0233641	0.0124647	0	0	no_fct
ENSG00000136960	0.572947	0.073098	0.00809567	0.0680462	0.0363025	0	0	ectonucleotide_pyrophosphatase/phosphodiesterase_2
ENSG00000214575	0.572845	0.442444	0.0280623	0.132013	0.0704289	0	0	cytoplasmic_polyadenylation_element_binding_protein_1
ENSG00000139734	0.571894	0.269202	0.00941442	0.0729258	0.0389057	0	0	diaphanous_homolog_3_(Drosophila)
ENSG00000131480	0.569698	0.0114482	0.051965	0.18419	0.0982647	0	0	amine_oxidase,_copper_containing_2_(retina-specific)
ENSG00000166710	0.5693	0.715733	0.0606488	0.201387	0.107439	0	0	beta-2-microglobulin
ENSG00000126353	0.569285	-0.265941	0.0177597	0.102545	0.0547075	0	0	chemokine_(C-C_motif)_receptor_7
ENSG00000103642	0.569149	0.0882539	0.00390742	0.0478166	0.0255101	0	0	lactamase,_beta
ENSG00000006747	0.569083	0.132246	0.230591	0.441666	0.235628	0	0	scinderin
ENSG00000099822	0.568848	-0.285493	0.0338857	0.145954	0.0778663	0	0	hyperpolarization_activated_cyclic_nucleotide-gated_potassium_channel_2
ENSG00000175768	0.568577	0.145584	0.143516	0.334779	0.178604	0	0	translocase_of_outer_mitochondrial_membrane_5_homolog_(yeast)
ENSG00000233937	0.567907	0.124669	0.079521	0.235268	0.125515	0	0	no_fct
ENSG00000152256	0.567657	0.501098	0.0153755	0.0951259	0.0507494	0	0	pyruvate_dehydrogenase_kinase,_isozyme_1
ENSG00000125319	0.567419	0.46602	0.00168105	0.0320314	0.0170887	0	0	chromosome_17_open_reading_frame_53
ENSG00000161896	0.566838	-0.149257	0.0222835	0.116315	0.0620537	0	0	inositol_hexakisphosphate_kinase_3
ENSG00000136999	0.566131	0.146502	0.00727209	0.0648392	0.0345916	0	0	nephroblastoma_overexpressed_gene
ENSG00000117597	0.566056	0.161978	0.0013401	0.0284907	0.0151997	0	0	digestive_organ_expansion_factor_homolog_(zebrafish)
ENSG00000166592	0.565964	0.486474	0.0475168	0.175621	0.0936935	0	0	Ras-related_associated_with_diabetes
ENSG00000066279	0.565603	-0.0346159	0.0592559	0.198509	0.105904	0	0	asp_(abnormal_spindle)_homolog,_microcephaly_associated_(Drosophila)
ENSG00000137198	0.56539	1.61765	0.06198	0.203886	0.108773	0	0	guanosine_monophosphate_reductase
ENSG00000164674	0.564857	0.355528	0.000268995	0.0156615	0.00835539	0	0	synaptotagmin-like_3
ENSG00000132661	0.564587	0.328097	0.00198373	0.0346073	0.0184629	0	0	NTF2-like_export_factor_1
ENSG00000122641	0.564509	0.486319	0.00517915	0.0547001	0.0291824	0	0	inhibin,_beta_A
ENSG00000059804	0.564049	0.292315	0.00058084	0.0199167	0.0106255	0	0	solute_carrier_family_2_(facilitated_glucose_transporter),_member_3
ENSG00000184988	0.563603	0.672766	0.011153	0.0794864	0.0424058	0	0	transmembrane_protein_106A
ENSG00000213683	0.563525	0.256927	0.00199156	0.0346697	0.0184962	0	0	no_fct
ENSG00000256849	0.563362	0.640556	0.169374	0.368977	0.196848	0	0	no_fct
ENSG00000159399	0.563279	0.476993	0.000630817	0.0204308	0.0108998	0	0	hexokinase_2
ENSG00000151014	0.5632	0.584211	0.0170134	0.100662	0.0537031	0	0	CCR4_carbon_catabolite_repression_4-like_(S._cerevisiae)
ENSG00000235272	0.563152	0.165818	0.00713858	0.0644428	0.0343801	0	0	no_fct
ENSG00000234925	0.562793	0.220777	0.371058	0.585048	0.312122	0	0	no_fct
ENSG00000167641	0.562527	-0.0264022	0.0914531	0.256352	0.136763	0	0	protein_phosphatase_1,_regulatory_(inhibitor)_subunit_14A
ENSG00000152952	0.56247	0.233177	0.0163177	0.0982937	0.0524395	0	0	procollagen-lysine,_2-oxoglutarate_5-dioxygenase_2
ENSG00000213123	0.562125	0.0572054	0.000317421	0.0165439	0.00882613	0	0	Tctex1_domain_containing_2
ENSG00000120129	0.561962	0.144827	0.000229866	0.0149093	0.0079541	0	0	dual_specificity_phosphatase_1
ENSG00000108179	0.561802	0.336542	0.000560323	0.0197658	0.010545	0	0	peptidylprolyl_isomerase_F
ENSG00000134107	0.561575	0.485264	0.0209661	0.112518	0.0600279	0	0	basic_helix-loop-helix_family,_member_e40
ENSG00000198468	0.561242	0.0854132	0.0460458	0.172632	0.092099	0	0	no_fct
ENSG00000175746	0.561202	-0.235449	0.150323	0.344193	0.183626	0	0	chromosome_15_open_reading_frame_54
ENSG00000219553	0.561004	0.151856	0.195919	0.403363	0.215193	0	0	no_fct
ENSG00000168427	0.560839	-0.00750564	0.030859	0.138532	0.0739064	0	0	kelch-like_30_(Drosophila)
ENSG00000169583	0.560414	-0.184315	0.0548888	0.190114	0.101425	0	0	chloride_intracellular_channel_3
ENSG00000007372	0.56023	-0.0404921	0.147264	0.339911	0.181342	0	0	paired_box_6
ENSG00000172936	0.56021	1.13827	0.00534541	0.0555304	0.0296253	0	0	myeloid_differentiation_primary_response_gene_(88)
ENSG00000184985	0.560063	0.0230841	0.0347016	0.147532	0.0787078	0	0	sortilin-related_VPS10_domain_containing_receptor_2
ENSG00000116711	0.559829	0.756572	0.0479597	0.176416	0.0941176	0	0	phospholipase_A2,_group_IVA_(cytosolic,_calcium-dependent)
ENSG00000203805	0.559244	-0.274382	0.00281475	0.040793	0.021763	0	0	phosphatidic_acid_phosphatase_type_2_domain_containing_1A
ENSG00000187951	0.558546	0.409845	0.0483279	0.177283	0.0945799	0	0	Rho_GTPase_activating_protein_11B
ENSG00000137558	0.55791	-1.16567	0.289003	0.505978	0.269938	0	0	peptidase_inhibitor_15
ENSG00000131435	0.557696	-0.0573958	0.00253846	0.0389779	0.0207946	0	0	PDZ_and_LIM_domain_4
ENSG00000173207	0.55761	0.58971	0.0291087	0.134651	0.0718359	0	0	CDC28_protein_kinase_regulatory_subunit_1B
ENSG00000174173	0.557069	0.165374	0.00842354	0.069185	0.03691	0	0	RNA_(guanine-9-)_methyltransferase_domain_containing_1
ENSG00000175305	0.556871	0.223794	0.0353606	0.148888	0.0794315	0	0	cyclin_E2
ENSG00000170779	0.556745	0.288263	0.00510834	0.0542946	0.0289661	0	0	cell_division_cycle_associated_4
ENSG00000213694	0.556646	0.119911	0.00448006	0.050832	0.0271187	0	0	sphingosine-1-phosphate_receptor_3
ENSG00000255893	0.556599	0.279357	0.0202164	0.109776	0.0585654	0	0	no_fct
ENSG00000230837	0.555985	0.536764	0.17667	0.378285	0.201814	0	0	no_fct
ENSG00000165997	0.553977	0.452395	0.0624993	0.204801	0.109261	0	0	ADP-ribosylation_factor-like_5B
ENSG00000054219	0.553703	0.17261	0.138264	0.328429	0.175216	0	0	lymphocyte_antigen_75
ENSG00000158825	0.552784	-0.109514	0.0195651	0.107978	0.0576061	0	0	cytidine_deaminase
ENSG00000226855	0.551988	2.66206	0.505289	0.698834	0.372826	0	0	no_fct
ENSG00000164929	0.551642	0.365094	0.0538441	0.188134	0.100369	0	0	brain_and_acute_leukemia,_cytoplasmic
ENSG00000232486	0.551022	0.548114	0.223505	0.433512	0.231278	0	0	no_fct
ENSG00000117586	0.550909	-0.0154256	0.12627	0.311551	0.166212	0	0	tumor_necrosis_factor_(ligand)_superfamily,_member_4
ENSG00000213085	0.550811	0.158235	0.051318	0.183048	0.0976555	0	0	coiled-coil_domain_containing_19
ENSG00000253570	0.54998	0.256288	7.64262e-05	0.00964985	0.00514817	0	0	no_fct
ENSG00000242017	0.54951	0.10462	0.0277385	0.131116	0.06995	0	0	no_fct
ENSG00000107796	0.549508	0.0654128	0.00455534	0.051191	0.0273103	0	0	actin,_alpha_2,_smooth_muscle,_aorta
ENSG00000169129	0.54937	0.606926	0.327734	0.544582	0.290533	0	0	actin_filament_associated_protein_1-like_2
ENSG00000143156	0.54905	0.308177	0.00603883	0.059861	0.0319357	0	0	non-metastatic_cells_7,_protein_expressed_in_(nucleoside-diphosphate_kinase)
ENSG00000213569	0.548811	0.375803	0.0827239	0.240803	0.128468	0	0	no_fct
ENSG00000134333	0.548446	0.130488	0.0157619	0.0964063	0.0514325	0	0	lactate_dehydrogenase_A
ENSG00000198918	0.546976	0.129238	0.0186182	0.105134	0.0560885	0	0	ribosomal_protein_L39
ENSG00000204899	0.546702	0.281369	0.0088864	0.0709657	0.0378601	0	0	mitotic_spindle_organizing_protein_1
ENSG00000170458	0.546591	-0.292768	0.272408	0.487128	0.259882	0	0	CD14_molecule
ENSG00000180747	0.546521	0.164682	0.0337309	0.145512	0.0776303	0	0	no_fct
ENSG00000175984	0.544992	-0.0481782	0.0424242	0.164964	0.0880081	0	0	DENN/MADD_domain_containing_2C
ENSG00000153976	0.544602	0.604369	0.0025075	0.0387096	0.0206515	0	0	heparan_sulfate_(glucosamine)_3-O-sulfotransferase_3A1
ENSG00000119698	0.544489	0.053518	0.064805	0.209099	0.111554	0	0	protein_phosphatase_4,_regulatory_subunit_4
ENSG00000092208	0.544251	0.0497939	0.0193585	0.107277	0.0572321	0	0	gem_(nuclear_organelle)_associated_protein_2
ENSG00000006625	0.54388	0.124238	0.00237589	0.0380404	0.0202945	0	0	gamma-glutamylcyclotransferase
ENSG00000229933	0.543581	-0.785389	0.0428489	0.165704	0.0884028	0	0	no_fct
ENSG00000172020	0.543516	0.545674	0.110861	0.286654	0.152929	0	0	growth_associated_protein_43
ENSG00000115919	0.543064	1.81453	0.471699	0.672304	0.358672	0	0	kynureninase
ENSG00000017483	0.542699	0.634166	0.00538252	0.0557944	0.0297662	0	0	solute_carrier_family_38,_member_5
ENSG00000154429	0.542415	0.447406	0.0421983	0.164608	0.0878181	0	0	chromosome_1_open_reading_frame_96
ENSG00000160256	0.54218	0.186151	0.0195743	0.107978	0.0576061	0	0	chromosome_21_open_reading_frame_70
ENSG00000249669	0.541684	-0.16887	0.0034954	0.0452617	0.024147	0	0	no_fct
ENSG00000196381	0.54157	0.0460024	0.203406	0.410828	0.219176	0	0	zinc_finger_protein_781
ENSG00000231389	0.541188	0.183168	0.0286435	0.133379	0.0711577	0	0	major_histocompatibility_complex,_class_II,_DP_alpha_1
ENSG00000174886	0.54104	0.309948	0.0591476	0.198364	0.105827	0	0	NADH_dehydrogenase_(ubiquinone)_1_alpha_subcomplex,_11,_14.7kDa
ENSG00000128656	0.540983	0.0284812	0.000939476	0.0236234	0.012603	0	0	chimerin_(chimaerin)_1
ENSG00000136802	0.540836	0.196479	0.0108753	0.0782276	0.0417343	0	0	leucine_rich_repeat_containing_8_family,_member_A
ENSG00000100084	0.540834	0.355456	0.000987633	0.0240793	0.0128462	0	0	HIR_histone_cell_cycle_regulation_defective_homolog_A_(S._cerevisiae)
ENSG00000020426	0.540509	0.203098	0.00263393	0.039588	0.0211201	0	0	menage_a_trois_homolog_1,_cyclin_H_assembly_factor_(Xenopus_laevis)
ENSG00000156804	0.53874	-0.0515944	0.00601878	0.059861	0.0319357	0	0	F-box_protein_32
ENSG00000227694	0.538477	0.999462	0.426099	0.63325	0.337838	0	0	no_fct
ENSG00000111602	0.538267	0.411466	0.00514255	0.0545449	0.0290996	0	0	timeless_homolog_(Drosophila)
ENSG00000226380	0.538265	-0.0359894	0.0223274	0.116467	0.0621347	0	0	no_fct
ENSG00000164104	0.537798	0.0918089	0.00761667	0.0664933	0.035474	0	0	high_mobility_group_box_2
ENSG00000110693	0.537528	-0.00709525	0.200739	0.408317	0.217836	0	0	SRY_(sex_determining_region_Y)-box_6
ENSG00000231672	0.536644	-0.421295	0.108069	0.282248	0.150579	0	0	no_fct
ENSG00000178078	0.536353	0.268733	0.00373579	0.0468487	0.0249937	0	0	signal_transducing_adaptor_family_member_2
ENSG00000254615	0.536228	0.256984	0.00532167	0.0554299	0.0295717	0	0	no_fct
ENSG00000149548	0.535955	0.193752	0.0224928	0.116918	0.0623755	0	0	coiled-coil_domain_containing_15
ENSG00000254461	0.53545	-0.0591563	0.0797103	0.235674	0.125732	0	0	no_fct
ENSG00000144063	0.534792	-0.265295	0.20316	0.410737	0.219128	0	0	mal,_T-cell_differentiation_protein-like
ENSG00000186480	0.534351	0.464052	0.0368856	0.152278	0.08124	0	0	insulin_induced_gene_1
ENSG00000180423	0.533901	0.0171952	0.00745845	0.0656576	0.0350282	0	0	harbinger_transposase_derived_1
ENSG00000023902	0.533804	0.115608	0.0109409	0.0784695	0.0418633	0	0	pleckstrin_homology_domain_containing,_family_O_member_1
ENSG00000172738	0.532948	0.385742	0.00261167	0.0395244	0.0210862	0	0	transmembrane_protein_217
ENSG00000256238	0.532648	0.56223	0.0780446	0.232455	0.124014	0	0	no_fct
ENSG00000112096	0.532633	0.0419127	0.000930599	0.0235151	0.0125453	0	0	superoxide_dismutase_2,_mitochondrial
ENSG00000234337	0.532457	0.492424	0.0330429	0.144138	0.0768971	0	0	no_fct
ENSG00000067057	0.531878	0.403071	0.00616954	0.0602421	0.032139	0	0	phosphofructokinase,_platelet
ENSG00000146425	0.53187	0.413573	0.000858905	0.022713	0.0121173	0	0	dynein,_light_chain,_Tctex-type_1
ENSG00000180353	0.531721	-0.125588	0.0188454	0.105791	0.0564392	0	0	hematopoietic_cell-specific_Lyn_substrate_1
ENSG00000088305	0.531027	-0.051526	0.0517665	0.183712	0.0980098	0	0	DNA_(cytosine-5-)-methyltransferase_3_beta
ENSG00000163565	0.530761	0.790151	0.00666707	0.0621251	0.0331436	0	0	interferon,_gamma-inducible_protein_16
ENSG00000244161	0.530365	-0.0514178	0.00515646	0.0546134	0.0291361	0	0	no_fct
ENSG00000163462	0.530175	-0.027548	0.0271481	0.130123	0.0694205	0	0	tripartite_motif_containing_46
ENSG00000145220	0.530111	0.156499	0.000745025	0.0216044	0.0115259	0	0	Ly1_antibody_reactive_homolog_(mouse)
ENSG00000112029	0.530048	0.321614	0.0107958	0.0778464	0.0415309	0	0	F-box_protein_5
ENSG00000180389	0.529722	0.571563	0.177467	0.379218	0.202312	0	0	ATP_synthase,_H+_transporting,_mitochondrial_F1_complex,_epsilon_subunit_pseudogene_2
ENSG00000124145	0.529695	-0.149937	0.00127198	0.027665	0.0147592	0	0	syndecan_4
ENSG00000100644	0.529639	-0.0189785	0.00246636	0.0383846	0.0204781	0	0	hypoxia_inducible_factor_1,_alpha_subunit_(basic_helix-loop-helix_transcription_factor)
ENSG00000137692	0.52949	0.103831	0.000464858	0.018497	0.00986812	0	0	DCN1,_defective_in_cullin_neddylation_1,_domain_containing_5_(S._cerevisiae)
ENSG00000125538	0.529395	-0.357466	0.120077	0.301823	0.161022	0	0	interleukin_1,_beta
ENSG00000110002	0.529326	-0.381741	0.0123342	0.0841048	0.0448697	0	0	von_Willebrand_factor_A_domain_containing_5A
ENSG00000225486	0.529277	0.330198	0.229535	0.44033	0.234915	0	0	no_fct
ENSG00000136490	0.528598	0.0912058	0.0082278	0.0685313	0.0365613	0	0	LIM_domain_containing_2
ENSG00000108679	0.526819	0.764418	0.0087849	0.0704612	0.0375909	0	0	lectin,_galactoside-binding,_soluble,_3_binding_protein
ENSG00000130164	0.526165	0.382669	0.00124434	0.0274574	0.0146485	0	0	low_density_lipoprotein_receptor
ENSG00000079308	0.525648	0.117632	0.00196026	0.0344743	0.018392	0	0	tensin_1
ENSG00000226688	0.525495	0.117458	0.0148154	0.0932942	0.0497722	0	0	no_fct
ENSG00000103064	0.525267	0.036889	0.0001122	0.0108174	0.00577103	0	0	solute_carrier_family_7_(amino_acid_transporter_light_chain,_y+L_system),_member_6
ENSG00000181773	0.524885	0.731646	0.0712858	0.220348	0.117555	0	0	G_protein-coupled_receptor_3
ENSG00000112576	0.524695	0.567408	0.00422172	0.0491861	0.0262407	0	0	cyclin_D3
ENSG00000227973	0.524573	0.270677	0.0421447	0.164486	0.0877531	0	0	no_fct
ENSG00000205578	0.523847	-0.117655	0.0437055	0.167693	0.0894641	0	0	POM121_membrane_glycoprotein_B_(pseudogene)
ENSG00000238917	0.523814	0.266801	0.0159401	0.0970122	0.0517558	0	0	small_nucleolar_RNA,_C/D_box_10
ENSG00000014138	0.523447	0.502648	0.00265943	0.0397174	0.0211891	0	0	polymerase_(DNA_directed),_alpha_2_(70kD_subunit)
ENSG00000165704	0.523355	0.282724	0.0196419	0.108093	0.0576672	0	0	hypoxanthine_phosphoribosyltransferase_1
ENSG00000119714	0.523311	0.377167	0.0345439	0.147287	0.0785774	0	0	G_protein-coupled_receptor_68
ENSG00000232615	0.523286	0.194137	0.147132	0.33966	0.181208	0	0	no_fct
ENSG00000240429	0.522825	0.247693	0.011461	0.0807537	0.0430819	0	0	no_fct
ENSG00000108829	0.522572	0.238143	0.000646243	0.0204308	0.0108998	0	0	leucine_rich_repeat_containing_59
ENSG00000213430	0.5212	0.465158	0.0341283	0.146333	0.0780683	0	0	heat_shock_60kDa_protein_1_(chaperonin)_pseudogene_1
ENSG00000231878	0.521145	0.337005	0.337064	0.553063	0.295058	0	0	no_fct
ENSG00000230844	0.520594	0.0288119	0.0103529	0.0758496	0.0404656	0	0	no_fct
ENSG00000254945	0.519823	0.00734284	0.188539	0.394175	0.210291	0	0	no_fct
ENSG00000149380	0.519618	0.21536	0.00679087	0.0627868	0.0334966	0	0	prolyl_4-hydroxylase,_alpha_polypeptide_III
ENSG00000118777	0.519343	0.832432	0.181314	0.384636	0.205202	0	0	ATP-binding_cassette,_sub-family_G_(WHITE),_member_2
ENSG00000112320	0.519293	0.498975	0.000492215	0.018757	0.0100068	0	0	sine_oculis_binding_protein_homolog_(Drosophila)
ENSG00000232112	0.519235	-0.0821649	0.0233574	0.119625	0.0638194	0	0	coiled-coil_domain_containing_72
ENSG00000176171	0.519116	0.346288	0.0365059	0.151696	0.0809292	0	0	BCL2/adenovirus_E1B_19kDa_interacting_protein_3
ENSG00000163170	0.518493	0.22337	0.00179361	0.0329801	0.0175948	0	0	bolA_homolog_3_(E._coli)
ENSG00000117308	0.51842	0.147856	0.00613381	0.0600241	0.0320227	0	0	UDP-galactose-4-epimerase
ENSG00000154928	0.518248	0.48955	0.0176513	0.102305	0.0545795	0	0	EPH_receptor_B1
ENSG00000196839	0.517146	-0.0322893	0.000477737	0.0185949	0.00992032	0	0	adenosine_deaminase
ENSG00000213090	0.517092	0.193508	0.232677	0.443816	0.236775	0	0	no_fct
ENSG00000127824	0.517074	0.166379	0.142585	0.333454	0.177897	0	0	tubulin,_alpha_4a
ENSG00000237298	0.516869	0.212013	0.0216069	0.11466	0.0611708	0	0	no_fct
ENSG00000196954	0.516824	0.320822	0.000190655	0.014445	0.00770636	0	0	caspase_4,_apoptosis-related_cysteine_peptidase
ENSG00000158457	0.516089	1.66776	0.122423	0.305365	0.162912	0	0	tetraspanin_33
ENSG00000138675	0.515284	0.0880223	0.000584568	0.0199167	0.0106255	0	0	fibroblast_growth_factor_5
ENSG00000224437	0.514795	0.487555	0.183445	0.387044	0.206487	0	0	no_fct
ENSG00000185128	0.514405	-0.324219	0.05824	0.196719	0.104949	0	0	TBC1_domain_family,_member_3F
ENSG00000168476	0.514259	0.163768	0.00403312	0.0484552	0.0258507	0	0	receptor_accessory_protein_4
ENSG00000151466	0.512505	0.457125	0.0507732	0.182063	0.0971304	0	0	sodium_channel_and_clathrin_linker_1
ENSG00000144034	0.512478	0.228117	0.0123462	0.0841189	0.0448772	0	0	TP53RK_binding_protein
ENSG00000167981	0.512246	0.275435	0.0142202	0.0912251	0.0486684	0	0	zinc_finger_protein_597
ENSG00000094841	0.512222	0.112721	0.000292274	0.016163	0.00862291	0	0	uracil_phosphoribosyltransferase_(FUR1)_homolog_(S._cerevisiae)
ENSG00000147166	0.511343	-0.247547	0.00665119	0.0621251	0.0331436	0	0	integrin_beta_1_binding_protein_(melusin)_2
ENSG00000101367	0.510903	0.170669	0.000964274	0.0237245	0.012657	0	0	microtubule-associated_protein,_RP/EB_family,_member_1
ENSG00000137691	0.510594	-0.013121	0.0133761	0.0882737	0.0470938	0	0	chromosome_11_open_reading_frame_70
ENSG00000166401	0.5102	0.146572	0.000434951	0.0181696	0.00969344	0	0	serpin_peptidase_inhibitor,_clade_B_(ovalbumin),_member_8
ENSG00000204790	0.50999	-0.857253	0.339883	0.556013	0.296632	0	0	COBW_domain_containing_6
ENSG00000164318	0.509824	0.11815	0.0216249	0.114673	0.0611775	0	0	EGF-like,_fibronectin_type_III_and_laminin_G_domains
ENSG00000214207	0.509732	0.664961	0.224724	0.435122	0.232137	0	0	no_fct
ENSG00000071282	0.509359	-0.272624	0.00400849	0.0482923	0.0257638	0	0	LIM_and_cysteine-rich_domains_1
ENSG00000103121	0.509192	0.26388	0.00320578	0.0437428	0.0233367	0	0	chromosome_16_open_reading_frame_61
ENSG00000164430	0.508566	0.560573	0.0674757	0.213915	0.114123	0	0	Mab-21_domain_containing_1
ENSG00000244363	0.508542	-0.362428	0.451481	0.654998	0.34944	0	0	no_fct
ENSG00000240395	0.508329	0.577566	0.15672	0.353095	0.188375	0	0	no_fct
ENSG00000005884	0.508199	0.116155	0.00860321	0.0695929	0.0371277	0	0	integrin,_alpha_3_(antigen_CD49C,_alpha_3_subunit_of_VLA-3_receptor)
ENSG00000254726	0.507537	0.174528	0.0836222	0.24219	0.129208	0	0	mex-3_homolog_A_(C._elegans)
ENSG00000102144	0.507423	0.304538	0.0103383	0.0758487	0.0404651	0	0	phosphoglycerate_kinase_1
ENSG00000168453	0.507375	-0.271087	0.0494472	0.17942	0.0957202	0	0	hairless_homolog_(mouse)
ENSG00000151470	0.50731	0.547796	0.0159672	0.0970775	0.0517906	0	0	chromosome_4_open_reading_frame_33
ENSG00000162073	0.507204	0.191811	0.00711933	0.0643672	0.0343397	0	0	progestin_and_adipoQ_receptor_family_member_IV
ENSG00000183873	0.506663	0.187221	0.0360475	0.150942	0.0805272	0	0	sodium_channel,_voltage-gated,_type_V,_alpha_subunit
ENSG00000172817	0.506111	0.0737591	0.25339	0.466504	0.248879	0	0	cytochrome_P450,_family_7,_subfamily_B,_polypeptide_1
ENSG00000176728	0.50536	-0.138885	0.0336863	0.145512	0.0776303	0	0	testis-specific_transcript,_Y-linked_14_(non-protein_coding)
ENSG00000116815	0.505101	0.22797	0.0282379	0.132362	0.0706147	0	0	CD58_molecule
ENSG00000139146	0.505038	0.251908	0.00829698	0.0687111	0.0366572	0	0	family_with_sequence_similarity_60,_member_A
ENSG00000101134	0.505009	0.125674	0.133206	0.321434	0.171484	0	0	docking_protein_5
ENSG00000131873	0.504934	0.25078	0.00700221	0.0637673	0.0340197	0	0	chondroitin_sulfate_synthase_1
ENSG00000189001	0.504828	-0.191332	0.212805	0.421938	0.225103	0	0	suprabasin
ENSG00000215414	0.504826	0.418638	0.0354653	0.149262	0.0796307	0	0	proteasome_(prosome,_macropain)_subunit,_alpha_type,_6_pseudogene_1
ENSG00000031691	0.504401	0.339425	0.0239069	0.121391	0.0647621	0	0	centromere_protein_Q
ENSG00000155287	0.504203	1.04149	0.000794267	0.0221282	0.0118053	0	0	solute_carrier_family_25,_member_28
ENSG00000182326	0.503688	0.271132	0.00823334	0.0685313	0.0365613	0	0	complement_component_1,_s_subcomponent
ENSG00000236199	0.50353	0.135114	0.0308838	0.138591	0.0739378	0	0	no_fct
ENSG00000168398	0.503482	-0.281094	0.0161089	0.0974748	0.0520026	0	0	bradykinin_receptor_B2
ENSG00000148200	0.503125	0.605441	0.0984347	0.267621	0.142775	0	0	nuclear_receptor_subfamily_6,_group_A,_member_1
ENSG00000169016	0.503044	0.176914	0.000465255	0.018497	0.00986812	0	0	E2F_transcription_factor_6
ENSG00000114346	0.502974	0.369901	0.0330485	0.144138	0.0768971	0	0	epithelial_cell_transforming_sequence_2_oncogene
ENSG00000159685	0.502785	0.0153348	0.00276288	0.040435	0.021572	0	0	coiled-coil-helix-coiled-coil-helix_domain_containing_6
ENSG00000130813	0.502092	1.11465	0.0193624	0.107277	0.0572321	0	0	chromosome_19_open_reading_frame_66
ENSG00000000460	0.502084	0.151609	0.0320222	0.141583	0.0755342	0	0	chromosome_1_open_reading_frame_112
ENSG00000183963	0.502081	0.12135	0.0192092	0.106736	0.0569432	0	0	smoothelin
ENSG00000117133	0.501391	0.225233	0.0165662	0.0988594	0.0527413	0	0	ribosome_production_factor_1_homolog_(S._cerevisiae)
ENSG00000078725	0.50136	-0.23172	0.29411	0.511027	0.272632	0	0	deleted_in_bladder_cancer_1
ENSG00000201784	0.501244	0.130836	0.0794069	0.235025	0.125385	0	0	small_nucleolar_RNA,_C/D_box_14A
ENSG00000197275	0.501093	0.151454	0.0403181	0.160095	0.0854101	0	0	RAD54_homolog_B_(S._cerevisiae)
ENSG00000171889	0.500725	0.136841	0.0147036	0.092938	0.0495822	0	0	no_fct
ENSG00000224155	0.500611	0.386561	0.00737091	0.0651952	0.0347815	0	0	no_fct
ENSG00000156466	0.500555	0.356463	0.055228	0.190873	0.10183	0	0	growth_differentiation_factor_6
ENSG00000164934	0.500364	0.163827	0.00281406	0.040793	0.021763	0	0	DDB1_and_CUL4_associated_factor_13
ENSG00000025772	0.500363	0.0776547	0.000557279	0.0197257	0.0105236	0	0	translocase_of_outer_mitochondrial_membrane_34
ENSG00000151320	0.500181	-0.408326	0.0921952	0.257378	0.137311	0	0	A_kinase_(PRKA)_anchor_protein_6
ENSG00000234883	0.49996	0.339129	0.0509722	0.182332	0.0972739	0	0	no_fct
ENSG00000255857	0.499631	-0.0815261	0.0346049	0.147377	0.078625	0	0	no_fct
ENSG00000142528	0.499458	0.124497	0.0041681	0.0490525	0.0261694	0	0	zinc_finger_protein_473
ENSG00000123965	0.498904	-0.195914	0.121815	0.30433	0.162359	0	0	postmeiotic_segregation_increased_2_pseudogene_5
ENSG00000185499	0.49854	0.163337	0.00160601	0.0311668	0.0166274	0	0	mucin_1,_cell_surface_associated
ENSG00000011422	0.498287	0.242094	0.0017024	0.0322565	0.0172087	0	0	plasminogen_activator,_urokinase_receptor
ENSG00000139618	0.498243	0.652668	0.0676028	0.214149	0.114248	0	0	breast_cancer_2,_early_onset
ENSG00000167513	0.498015	0.360781	0.0289385	0.134201	0.0715958	0	0	chromatin_licensing_and_DNA_replication_factor_1
ENSG00000178685	0.497997	1.58322	0.0699455	0.218311	0.116468	0	0	poly_(ADP-ribose)_polymerase_family,_member_10
ENSG00000242125	0.497478	0.0185707	0.00048945	0.018757	0.0100068	0	0	no_fct
ENSG00000111669	0.497385	0.180188	0.0088388	0.0707252	0.0377317	0	0	triosephosphate_isomerase_1
ENSG00000172575	0.497364	-0.092869	0.135544	0.324997	0.173385	0	0	RAS_guanyl_releasing_protein_1_(calcium_and_DAG-regulated)
ENSG00000058804	0.497176	0.239426	0.00588258	0.0589461	0.0314476	0	0	transmembrane_protein_48
ENSG00000123609	0.496948	0.990507	0.0441993	0.168449	0.0898673	0	0	N-myc_(and_STAT)_interactor
ENSG00000245602	0.495515	0.21698	0.0443379	0.168835	0.0900733	0	0	no_fct
ENSG00000157483	0.49526	0.21665	0.00410297	0.0487794	0.0260237	0	0	myosin_IE
ENSG00000143401	0.494947	0.15901	0.0233719	0.119625	0.0638194	0	0	acidic_(leucine-rich)_nuclear_phosphoprotein_32_family,_member_E
ENSG00000175137	0.494802	0.0732364	0.00539339	0.0557944	0.0297662	0	0	SH3-binding_domain_protein_5-like
ENSG00000204767	0.494578	-0.147872	0.0170953	0.100951	0.0538573	0	0	family_with_sequence_similarity_196,_member_B
ENSG00000236735	0.493818	0.718036	0.162919	0.361251	0.192726	0	0	no_fct
ENSG00000255725	0.493815	0.23887	0.0950761	0.261904	0.139725	0	0	no_fct
ENSG00000183386	0.493712	0.203339	0.00300011	0.0419321	0.0223707	0	0	four_and_a_half_LIM_domains_3
ENSG00000114450	0.493442	0.513709	0.0197218	0.108411	0.0578371	0	0	guanine_nucleotide_binding_protein_(G_protein),_beta_polypeptide_4
ENSG00000144802	0.492933	0.24729	0.176301	0.377928	0.201624	0	0	nuclear_factor_of_kappa_light_polypeptide_gene_enhancer_in_B-cells_inhibitor,_zeta
ENSG00000186603	0.492915	0.0325181	0.139502	0.330071	0.176092	0	0	4-hydroxyphenylpyruvate_dioxygenase-like
ENSG00000077454	0.492869	0.17248	0.00844037	0.0692755	0.0369583	0	0	leucine-rich_repeats_and_calponin_homology_(CH)_domain_containing_4
ENSG00000145050	0.492668	0.234232	0.105971	0.279253	0.148981	0	0	mesencephalic_astrocyte-derived_neurotrophic_factor
ENSG00000135912	0.491989	0.0832761	0.000116939	0.0110979	0.0059207	0	0	tubulin_tyrosine_ligase-like_family,_member_4
ENSG00000014257	0.491846	0.75467	0.181388	0.384636	0.205202	0	0	acid_phosphatase,_prostate
ENSG00000129226	0.491373	0.521226	0.00814184	0.0682042	0.0363868	0	0	CD68_molecule
ENSG00000049541	0.49124	0.243955	0.00662891	0.0619906	0.0330719	0	0	replication_factor_C_(activator_1)_2,_40kDa
ENSG00000160813	0.491238	-0.0087806	0.103443	0.275013	0.146719	0	0	chromosome_7_open_reading_frame_47
ENSG00000247626	0.491107	0.297202	0.0031764	0.0434246	0.0231669	0	0	methionyl-tRNA_synthetase_2,_mitochondrial
ENSG00000008283	0.490863	0.137682	0.000446797	0.0183586	0.00979427	0	0	cytochrome_b-561
ENSG00000166562	0.490469	0.0315909	0.00799676	0.0677606	0.0361501	0	0	SEC11_homolog_C_(S._cerevisiae)
ENSG00000130720	0.490363	0.200459	0.11818	0.298494	0.159246	0	0	fibrinogen_C_domain_containing_1
ENSG00000184675	0.490099	0.150873	0.00068825	0.0209039	0.0111522	0	0	family_with_sequence_similarity_123B
ENSG00000169372	0.490088	-0.0706313	0.00742739	0.065541	0.034966	0	0	CASP2_and_RIPK1_domain_containing_adaptor_with_death_domain
ENSG00000149131	0.489993	0.36575	0.0187286	0.105561	0.0563166	0	0	serpin_peptidase_inhibitor,_clade_G_(C1_inhibitor),_member_1
ENSG00000214922	0.489946	0.102211	0.0223551	0.116487	0.0621458	0	0	no_fct
ENSG00000040275	0.489868	0.0825594	0.00243112	0.0382221	0.0203914	0	0	coiled-coil_domain_containing_99
ENSG00000037897	0.488948	0.522223	0.00269655	0.0399074	0.0212905	0	0	methyltransferase_like_1
ENSG00000184844	0.488934	0.948279	0.38956	0.601216	0.320747	0	0	no_fct
ENSG00000132423	0.488796	0.0874808	0.0168729	0.100081	0.0533929	0	0	coenzyme_Q3_homolog,_methyltransferase_(S._cerevisiae)
ENSG00000223477	0.488676	-0.632785	0.1293	0.315947	0.168557	0	0	no_fct
ENSG00000213025	0.488553	0.0663688	0.00331557	0.0444506	0.0237143	0	0	no_fct
ENSG00000034152	0.488252	0.000734266	0.0080958	0.0680462	0.0363025	0	0	mitogen-activated_protein_kinase_kinase_3
ENSG00000229647	0.487915	-0.202222	0.0503943	0.181429	0.0967922	0	0	no_fct
ENSG00000229944	0.48772	0.181841	0.00982846	0.0741391	0.039553	0	0	no_fct
ENSG00000115556	0.487269	-0.159331	0.0171127	0.100951	0.0538573	0	0	phospholipase_C,_delta_4
ENSG00000066697	0.487181	0.181449	0.00592648	0.0592245	0.0315961	0	0	chromosome_9_open_reading_frame_30
ENSG00000135148	0.485736	0.467226	0.00335195	0.0446623	0.0238272	0	0	TRAF-type_zinc_finger_domain_containing_1
ENSG00000169689	0.485542	0.122997	0.0124059	0.0842914	0.0449693	0	0	stimulated_by_retinoic_acid_13_homolog_(mouse)
ENSG00000152689	0.485417	0.965966	0.0806003	0.237363	0.126633	0	0	RAS_guanyl_releasing_protein_3_(calcium_and_DAG-regulated)
ENSG00000129932	0.485352	0.330204	0.0767092	0.230566	0.123007	0	0	deoxyhypusine_hydroxylase/monooxygenase
ENSG00000177465	0.485187	-0.0195171	0.05358	0.187479	0.10002	0	0	acyl-CoA_thioesterase_4
ENSG00000100567	0.485171	0.365266	0.0112467	0.0800381	0.0427001	0	0	proteasome_(prosome,_macropain)_subunit,_alpha_type,_3
ENSG00000196172	0.48501	0.0969719	0.0156897	0.0960844	0.0512608	0	0	zinc_finger_protein_681
ENSG00000146918	0.484256	0.314394	0.00727538	0.0648392	0.0345916	0	0	non-SMC_condensin_II_complex,_subunit_G2
ENSG00000206052	0.48385	-0.159462	0.0920625	0.257206	0.137219	0	0	docking_protein_6
ENSG00000160298	0.483527	-0.13022	0.0146447	0.0928408	0.0495304	0	0	chromosome_21_open_reading_frame_58
ENSG00000085563	0.483181	2.32617	0.491526	0.687753	0.366915	0	0	ATP-binding_cassette,_sub-family_B_(MDR/TAP),_member_1
ENSG00000146267	0.483157	-0.177329	0.0154638	0.0952516	0.0508165	0	0	chromosome_6_open_reading_frame_168
ENSG00000119013	0.483118	0.0736477	0.00120234	0.0270849	0.0144497	0	0	NADH_dehydrogenase_(ubiquinone)_1_beta_subcomplex,_3,_12kDa
ENSG00000030110	0.483092	0.254332	0.00727246	0.0648392	0.0345916	0	0	BCL2-antagonist/killer_1
ENSG00000073756	0.482794	0.323891	0.243407	0.455616	0.24307	0	0	prostaglandin-endoperoxide_synthase_2_(prostaglandin_G/H_synthase_and_cyclooxygenase)
ENSG00000235531	0.482549	0.390395	0.0123817	0.084205	0.0449232	0	0	no_fct
ENSG00000123353	0.482519	0.24362	0.0018519	0.0336092	0.0179304	0	0	ORM1-like_2_(S._cerevisiae)
ENSG00000106366	0.482387	0.0607087	0.000731477	0.0213917	0.0114124	0	0	serpin_peptidase_inhibitor,_clade_E_(nexin,_plasminogen_activator_inhibitor_type_1),_member_1
ENSG00000154723	0.482291	0.120448	0.00700964	0.0637673	0.0340197	0	0	ATP_synthase,_H+_transporting,_mitochondrial_Fo_complex,_subunit_F6
ENSG00000137699	0.481773	-0.346575	0.0458872	0.172475	0.0920151	0	0	tripartite_motif_containing_29
ENSG00000156136	0.481533	0.295641	0.0353158	0.148888	0.0794315	0	0	deoxycytidine_kinase
ENSG00000135604	0.481521	0.473682	0.0845619	0.243855	0.130096	0	0	syntaxin_11
ENSG00000069399	0.481294	-0.242507	0.0468168	0.17426	0.0929672	0	0	B-cell_CLL/lymphoma_3
ENSG00000106484	0.48116	-0.370707	0.0448901	0.169839	0.0906087	0	0	mesoderm_specific_transcript_homolog_(mouse)
ENSG00000229598	0.480192	0.73137	0.248031	0.460442	0.245645	0	0	no_fct
ENSG00000205309	0.479941	0.199163	0.025943	0.126453	0.0674624	0	0	5',3'-nucleotidase,_mitochondrial
ENSG00000220749	0.479717	0.462272	0.406594	0.615918	0.328591	0	0	no_fct
ENSG00000150782	0.479535	0.0450253	0.467232	0.667804	0.356272	0	0	interleukin_18_(interferon-gamma-inducing_factor)
ENSG00000100764	0.479399	-0.157662	0.0392356	0.15794	0.0842605	0	0	proteasome_(prosome,_macropain)_26S_subunit,_ATPase,_1
ENSG00000116863	0.479391	0.66747	0.00238156	0.0380404	0.0202945	0	0	ADP-ribosylhydrolase_like_2
ENSG00000198298	0.479381	-0.119748	0.013515	0.0887527	0.0473494	0	0	zinc_finger_protein_485
ENSG00000112343	0.479126	0.739375	0.0480298	0.176585	0.0942079	0	0	tripartite_motif_containing_38
ENSG00000168542	0.478985	-0.0258504	0.00224322	0.0371428	0.0198156	0	0	collagen,_type_III,_alpha_1
ENSG00000149212	0.478837	0.177775	0.326759	0.543679	0.290051	0	0	sestrin_3
ENSG00000107262	0.478184	0.877364	0.0350361	0.148268	0.0791008	0	0	BCL2-associated_athanogene
ENSG00000232454	0.477958	0.268347	0.0617475	0.203747	0.108699	0	0	no_fct
ENSG00000091428	0.477904	0.514727	0.0298103	0.136373	0.0727544	0	0	Rap_guanine_nucleotide_exchange_factor_(GEF)_4
ENSG00000198225	0.477829	0.228624	0.00730775	0.0649259	0.0346378	0	0	FK506_binding_protein_1C
ENSG00000251495	0.477789	1.37304	0.575074	0.749476	0.399844	0	0	no_fct
ENSG00000178980	0.477579	-0.0340884	0.000689217	0.0209039	0.0111522	0	0	selenoprotein_W_
ENSG00000101888	0.477319	0.345542	0.0316305	0.140654	0.0750388	0	0	nuclear_transport_factor_2-like_export_factor_2
ENSG00000239559	0.477318	0.681279	0.269712	0.484309	0.258378	0	0	no_fct
ENSG00000129235	0.477112	0.132168	0.00055044	0.0197257	0.0105236	0	0	thioredoxin_domain_containing_17
ENSG00000131462	0.476763	0.123611	0.00319262	0.0436058	0.0232636	0	0	tubulin,_gamma_1
ENSG00000152137	0.475602	0.0403263	0.00112472	0.0261368	0.0139439	0	0	heat_shock_22kDa_protein_8
ENSG00000185338	0.47492	0.276469	0.0702806	0.218567	0.116605	0	0	suppressor_of_cytokine_signaling_1
ENSG00000189143	0.474787	-0.0885587	0.166562	0.365745	0.195124	0	0	claudin_4
ENSG00000213533	0.473809	0.648102	0.104635	0.27718	0.147875	0	0	transmembrane_protein_110
ENSG00000140525	0.472959	0.384431	0.00762382	0.0665163	0.0354863	0	0	Fanconi_anemia,_complementation_group_I
ENSG00000082074	0.472677	0.688339	0.167341	0.366799	0.195687	0	0	FYN_binding_protein
ENSG00000197312	0.472653	0.0564314	0.00337501	0.0447602	0.0238794	0	0	DNA-damage_inducible_1_homolog_2_(S._cerevisiae)
ENSG00000073712	0.471945	0.00615574	0.00503139	0.0539444	0.0287792	0	0	fermitin_family_member_2
ENSG00000163918	0.47194	0.136028	0.0112925	0.0801994	0.0427862	0	0	replication_factor_C_(activator_1)_4,_37kDa
ENSG00000128510	0.471846	-0.794412	0.00306828	0.0424914	0.022669	0	0	carboxypeptidase_A4
ENSG00000185010	0.471793	-0.216553	0.0633017	0.206193	0.110004	0	0	coagulation_factor_VIII,_procoagulant_component
ENSG00000196466	0.471711	-0.046151	0.0224681	0.116906	0.0623688	0	0	zinc_finger_protein_799
ENSG00000224138	0.470696	-0.474916	0.0613244	0.202748	0.108166	0	0	no_fct
ENSG00000223865	0.470519	0.123339	0.028245	0.132362	0.0706147	0	0	major_histocompatibility_complex,_class_II,_DP_beta_1
ENSG00000240509	0.470359	0.499797	0.141052	0.331873	0.177053	0	0	no_fct
ENSG00000010438	0.470332	-0.0124488	0.0316694	0.140785	0.0751084	0	0	protease,_serine,_3
ENSG00000188396	0.470226	-0.0189584	0.0283229	0.1326	0.070742	0	0	no_fct
ENSG00000145247	0.469614	0.12103	0.000452089	0.0184409	0.00983819	0	0	OCIA_domain_containing_2
ENSG00000186230	0.469566	0.043093	0.00176571	0.0327816	0.0174889	0	0	zinc_finger_protein_749
ENSG00000141052	0.469323	-0.760219	0.114369	0.29241	0.156	0	0	myocardin
ENSG00000232389	0.468601	0.155797	0.0854156	0.245348	0.130892	0	0	no_fct
ENSG00000103855	0.46859	0.225253	0.00873749	0.0702725	0.0374902	0	0	CD276_molecule
ENSG00000151882	0.468553	0.0805948	0.0257586	0.12626	0.0673593	0	0	chemokine_(C-C_motif)_ligand_28
ENSG00000166130	0.468275	0.144762	0.00852418	0.069514	0.0370856	0	0	IKBKB_interacting_protein
ENSG00000182108	0.468132	0.144296	0.0021113	0.0357335	0.0190638	0	0	Dexi_homolog_(mouse)
ENSG00000233087	0.468073	0.341648	0.0183454	0.104516	0.0557592	0	0	no_fct
ENSG00000226824	0.467383	-0.232031	0.20012	0.407611	0.21746	0	0	no_fct
ENSG00000140464	0.46722	0.783768	0.0132458	0.087729	0.0468032	0	0	promyelocytic_leukemia
ENSG00000124571	0.466917	0.234197	0.000824926	0.0224301	0.0119664	0	0	exportin_5
ENSG00000006634	0.466896	0.28477	0.00847014	0.0692908	0.0369665	0	0	DBF4_homolog_(S._cerevisiae)
ENSG00000132256	0.466522	0.875036	0.017557	0.102161	0.0545029	0	0	tripartite_motif_containing_5
ENSG00000028137	0.465766	0.501907	0.0382459	0.155315	0.0828604	0	0	tumor_necrosis_factor_receptor_superfamily,_member_1B
ENSG00000101945	0.465694	0.325143	0.00892952	0.0712179	0.0379946	0	0	suppressor_of_variegation_3-9_homolog_1_(Drosophila)
ENSG00000172939	0.465672	0.159215	0.00208107	0.0353902	0.0188806	0	0	oxidative-stress_responsive_1
ENSG00000213281	0.46544	0.124034	0.00514302	0.0545449	0.0290996	0	0	neuroblastoma_RAS_viral_(v-ras)_oncogene_homolog
ENSG00000113389	0.46535	0.17103	0.0121785	0.0834622	0.0445269	0	0	natriuretic_peptide_receptor_C/guanylate_cyclase_C_(atrionatriuretic_peptide_receptor_C)
ENSG00000115520	0.465172	0.357318	0.0145228	0.0925209	0.0493597	0	0	coenzyme_Q10_homolog_B_(S._cerevisiae)
ENSG00000126767	0.464657	0.175528	0.00613707	0.0600241	0.0320227	0	0	ELK1,_member_of_ETS_oncogene_family
ENSG00000166920	0.464573	1.20653	0.0600924	0.200327	0.106874	0	0	chromosome_15_open_reading_frame_48
ENSG00000102575	0.464541	0.220044	0.0861031	0.246272	0.131385	0	0	acid_phosphatase_5,_tartrate_resistant
ENSG00000221869	0.464516	-0.00654713	0.0394082	0.158182	0.0843895	0	0	CCAAT/enhancer_binding_protein_(C/EBP),_delta
ENSG00000250510	0.464441	-0.173468	0.00584341	0.0587537	0.0313449	0	0	G_protein-coupled_receptor_162
ENSG00000132357	0.464333	0.267523	0.00240371	0.0381684	0.0203628	0	0	caspase_recruitment_domain_family,_member_6
ENSG00000197943	0.464139	0.45111	0.0588345	0.197681	0.105463	0	0	phospholipase_C,_gamma_2_(phosphatidylinositol-specific)
ENSG00000211448	0.46293	-0.912698	0.10432	0.276742	0.147641	0	0	deiodinase,_iodothyronine,_type_II
ENSG00000121060	0.462144	1.03092	0.00406357	0.0485582	0.0259057	0	0	tripartite_motif_containing_25
ENSG00000130489	0.461868	0.482235	0.0292036	0.134849	0.0719415	0	0	SCO_cytochrome_oxidase_deficient_homolog_2_(yeast)
ENSG00000115657	0.46179	0.190569	0.0747778	0.227316	0.121273	0	0	ATP-binding_cassette,_sub-family_B_(MDR/TAP),_member_6
ENSG00000228253	0.461531	0.102023	0.141594	0.332417	0.177344	0	0	no_fct
ENSG00000162851	0.461387	0.115136	0.00178988	0.0329526	0.0175802	0	0	transcription_factor_B2,_mitochondrial
ENSG00000104312	0.461129	0.290101	0.00119048	0.02689	0.0143458	0	0	receptor-interacting_serine-threonine_kinase_2
ENSG00000170542	0.461125	0.108027	0.00289454	0.0413132	0.0220405	0	0	serpin_peptidase_inhibitor,_clade_B_(ovalbumin),_member_9
ENSG00000196116	0.460955	1.06186	0.0148916	0.0936132	0.0499425	0	0	tudor_domain_containing_7
ENSG00000188820	0.460919	0.7111	0.236903	0.448673	0.239366	0	0	family_with_sequence_similarity_26,_member_F
ENSG00000101412	0.460354	0.544012	0.028184	0.132287	0.0705748	0	0	E2F_transcription_factor_1
ENSG00000113361	0.460145	0.357312	0.330205	0.546564	0.291591	0	0	cadherin_6,_type_2,_K-cadherin_(fetal_kidney)
ENSG00000233382	0.460131	-0.122618	0.240834	0.453005	0.241677	0	0	NFKB_activating_protein_pseudogene_1
ENSG00000081277	0.460012	0.161519	0.346499	0.561963	0.299806	0	0	plakophilin_1_(ectodermal_dysplasia/skin_fragility_syndrome)
ENSG00000179841	0.45968	0.0907809	0.109848	0.285136	0.152119	0	0	A_kinase_(PRKA)_anchor_protein_5
ENSG00000240731	0.459389	-0.103635	0.0277348	0.131116	0.06995	0	0	no_fct
ENSG00000205981	0.459203	0.228269	0.0174526	0.101876	0.0543507	0	0	DnaJ_(Hsp40)_homolog,_subfamily_C,_member_19
ENSG00000188643	0.458826	0.0364416	0.00464857	0.0518034	0.027637	0	0	S100_calcium_binding_protein_A16
ENSG00000076706	0.458748	0.0833767	0.0056253	0.0574821	0.0306666	0	0	melanoma_cell_adhesion_molecule
ENSG00000115648	0.458659	-0.0598601	0.0468518	0.174302	0.0929897	0	0	melanophilin
ENSG00000196247	0.45806	0.626361	0.11778	0.297791	0.158871	0	0	zinc_finger_protein_107
ENSG00000067082	0.457839	0.441359	0.0164683	0.0985188	0.0525596	0	0	Kruppel-like_factor_6
ENSG00000110660	0.45755	0.143174	0.0807733	0.237588	0.126752	0	0	solute_carrier_family_35,_member_F2
ENSG00000134531	0.457424	0.229348	0.00348887	0.0452568	0.0241444	0	0	epithelial_membrane_protein_1
ENSG00000138435	0.457413	0.828262	0.240553	0.452672	0.2415	0	0	cholinergic_receptor,_nicotinic,_alpha_1_(muscle)
ENSG00000189221	0.457384	-0.0336615	0.0267868	0.129022	0.068833	0	0	monoamine_oxidase_A
ENSG00000226535	0.457111	1.16124	0.530281	0.716857	0.382442	0	0	no_fct
ENSG00000160193	0.457066	0.24589	0.00610362	0.0599483	0.0319823	0	0	WD_repeat_domain_4
ENSG00000082482	0.457058	0.329984	0.00350853	0.045352	0.0241952	0	0	potassium_channel,_subfamily_K,_member_2
ENSG00000108001	0.457056	0.525605	0.141962	0.332865	0.177583	0	0	early_B-cell_factor_3
ENSG00000212901	0.456691	-0.650097	0.409447	0.617819	0.329605	0	0	keratin_associated_protein_3-1
ENSG00000154380	0.456564	-0.0583813	0.00273047	0.0402458	0.021471	0	0	enabled_homolog_(Drosophila)
ENSG00000100003	0.456266	-0.176614	0.00770947	0.0667543	0.0356133	0	0	SEC14-like_2_(S._cerevisiae)
ENSG00000067798	0.455833	0.276906	0.0337267	0.145512	0.0776303	0	0	neuron_navigator_3
ENSG00000124201	0.455831	1.01306	0.00677951	0.0627212	0.0334616	0	0	zinc_finger,_NFX1-type_containing_1
ENSG00000115946	0.454967	0.388407	0.0151911	0.0946466	0.0504937	0	0	partner_of_NOB1_homolog_(S._cerevisiae)
ENSG00000104635	0.454932	0.19179	0.00292692	0.0416253	0.022207	0	0	solute_carrier_family_39_(zinc_transporter),_member_14
ENSG00000152778	0.454738	0.836746	0.01772	0.102545	0.0547075	0	0	interferon-induced_protein_with_tetratricopeptide_repeats_5
ENSG00000177409	0.454646	1.85005	0.139904	0.33044	0.176289	0	0	sterile_alpha_motif_domain_containing_9-like
ENSG00000255201	0.45462	0.108893	0.113584	0.291155	0.155331	0	0	no_fct
ENSG00000103196	0.454602	-0.395853	0.0165796	0.0988991	0.0527625	0	0	cysteine-rich_secretory_protein_LCCL_domain_containing_2
ENSG00000160613	0.454421	0.0445207	0.00046259	0.018491	0.00986491	0	0	proprotein_convertase_subtilisin/kexin_type_7
ENSG00000205873	0.454392	0.0790409	0.00625026	0.0604058	0.0322263	0	0	Uncharacterized_proteincDNA_FLJ26472_fis,_clone_KDN04506
ENSG00000228285	0.453653	0.146909	0.0542555	0.188989	0.100825	0	0	lysophospholipase_II_pseudogene_1
ENSG00000110031	0.453501	0.217773	0.00773164	0.0668229	0.0356498	0	0	leupaxin
ENSG00000225603	0.453485	0.638028	0.343914	0.559621	0.298556	0	0	no_fct
ENSG00000131871	0.452928	0.218811	0.000990758	0.0240893	0.0128516	0	0	Selenoprotein_S
ENSG00000137364	0.452765	0.120106	0.00685928	0.0633397	0.0337916	0	0	thiopurine_S-methyltransferase
ENSG00000137266	0.452741	-0.114573	0.0332212	0.144624	0.0771564	0	0	solute_carrier_family_22,_member_23
ENSG00000118849	0.452475	0.111665	0.0465299	0.173891	0.0927704	0	0	retinoic_acid_receptor_responder_(tazarotene_induced)_1
ENSG00000162878	0.452447	-0.00499246	0.172985	0.373713	0.199375	0	0	protein_kinase_domain_containing,_cytoplasmic_homolog_(mouse)
ENSG00000167552	0.452438	0.143939	0.0184644	0.104788	0.0559043	0	0	tubulin,_alpha_1a
ENSG00000036448	0.452284	0.174371	0.342755	0.558277	0.297839	0	0	myomesin_(M-protein)_2,_165kDa
ENSG00000140280	0.452087	0.247477	0.0704124	0.218793	0.116726	0	0	LysM,_putative_peptidoglycan-binding,_domain_containing_2
ENSG00000164610	0.451878	-0.000657653	0.00175505	0.0326794	0.0174344	0	0	retinitis_pigmentosa_9_(autosomal_dominant)
ENSG00000123358	0.451727	0.221241	0.10738	0.281312	0.150079	0	0	nuclear_receptor_subfamily_4,_group_A,_member_1
ENSG00000170540	0.451556	0.225349	0.0231325	0.118872	0.0634182	0	0	ADP-ribosylation_factor-like_6_interacting_protein_1
ENSG00000134058	0.451417	0.199414	0.0186338	0.105181	0.0561141	0	0	cyclin-dependent_kinase_7
ENSG00000165996	0.451406	0.14707	0.0125119	0.0846603	0.0451661	0	0	protein_tyrosine_phosphatase-like_(proline_instead_of_catalytic_arginine),_member_A
ENSG00000125459	0.45118	0.195697	0.00119105	0.02689	0.0143458	0	0	misato_homolog_1_(Drosophila)
ENSG00000101194	0.450819	0.290989	0.0179807	0.103238	0.0550772	0	0	solute_carrier_family_17,_member_9
ENSG00000186472	0.450787	0.621467	0.161688	0.359823	0.191965	0	0	piccolo_(presynaptic_cytomatrix_protein)
ENSG00000138496	0.450658	1.29876	0.0183404	0.104516	0.0557592	0	0	poly_(ADP-ribose)_polymerase_family,_member_9
ENSG00000130702	0.450556	-0.0542173	0.167935	0.367262	0.195933	0	0	laminin,_alpha_5
ENSG00000138760	0.450402	0.467615	0.00693039	0.0634782	0.0338655	0	0	scavenger_receptor_class_B,_member_2
ENSG00000132763	0.450209	-0.119247	0.00226173	0.0371428	0.0198156	0	0	methylmalonic_aciduria_(cobalamin_deficiency)_cblC_type,_with_homocystinuria
ENSG00000239713	0.449812	0.984198	0.0366421	0.151907	0.0810422	0	0	apolipoprotein_B_mRNA_editing_enzyme,_catalytic_polypeptide-like_3G
ENSG00000116514	0.449805	0.897027	0.00661	0.0618925	0.0330195	0	0	ring_finger_protein_19B
ENSG00000143942	0.449591	0.215201	0.0680253	0.214594	0.114485	0	0	ChaC,_cation_transport_regulator_homolog_2_(E._coli)
ENSG00000174576	0.449346	0.543135	0.246944	0.459466	0.245124	0	0	neuronal_PAS_domain_protein_4
ENSG00000242265	0.449186	0.267594	0.074885	0.22736	0.121296	0	0	no_fct
ENSG00000103811	0.448981	0.12087	0.0217872	0.115019	0.0613623	0	0	cathepsin_H
ENSG00000162702	0.448971	-0.0107042	0.0258762	0.126405	0.0674369	0	0	zinc_finger_protein_281
ENSG00000171608	0.448287	-0.0663028	0.0172999	0.101675	0.0542435	0	0	phosphoinositide-3-kinase,_catalytic,_delta_polypeptide
ENSG00000131386	0.44825	-0.351852	0.152611	0.347508	0.185395	0	0	UDP-N-acetyl-alpha-D-galactosamine:polypeptide_N-acetylgalactosaminyltransferase-like_2
ENSG00000163738	0.448197	0.187897	0.116825	0.296496	0.15818	0	0	methylenetetrahydrofolate_dehydrogenase_(NADP+_dependent)_2-like
ENSG00000158186	0.448035	0.167593	0.00136991	0.0285836	0.0152493	0	0	muscle_RAS_oncogene_homolog
ENSG00000100926	0.447547	0.178529	0.00273856	0.0402952	0.0214974	0	0	transmembrane_9_superfamily_member_1
ENSG00000137819	0.447351	0.0436676	0.0057847	0.0583228	0.0311151	0	0	progestin_and_adipoQ_receptor_family_member_V
ENSG00000249129	0.447248	0.208963	0.043312	0.166873	0.0890262	0	0	no_fct
ENSG00000215012	0.447217	-0.15341	0.00621341	0.0603291	0.0321854	0	0	chromosome_22_open_reading_frame_29
ENSG00000155561	0.447216	0.362002	0.00717881	0.0644691	0.0343941	0	0	nucleoporin_205kDa
ENSG00000215319	0.446776	0.029454	0.0874728	0.248949	0.132814	0	0	no_fct
ENSG00000134954	0.446753	0.109827	0.009124	0.0719795	0.0384009	0	0	v-ets_erythroblastosis_virus_E26_oncogene_homolog_1_(avian)
ENSG00000114209	0.446686	0.185003	0.00914242	0.0720327	0.0384293	0	0	programmed_cell_death_10
ENSG00000188486	0.446648	0.167367	0.0970851	0.265276	0.141524	0	0	H2A_histone_family,_member_X
ENSG00000158042	0.446417	0.442487	0.00245853	0.0383103	0.0204384	0	0	mitochondrial_ribosomal_protein_L17
ENSG00000224837	0.446256	0.0998992	0.00336017	0.0446909	0.0238425	0	0	no_fct
ENSG00000166889	0.446092	0.556236	0.000528225	0.019377	0.0103376	0	0	protein_associated_with_topoisomerase_II_homolog_1_(yeast)
ENSG00000233347	0.445865	0.474726	0.186251	0.390893	0.208541	0	0	no_fct
ENSG00000108961	0.445755	0.16095	0.307934	0.525271	0.280231	0	0	RAN_guanine_nucleotide_release_factor
ENSG00000116954	0.445599	0.312509	0.00402312	0.0484288	0.0258367	0	0	Ras-related_GTP_binding_C
ENSG00000109881	0.445253	0.147344	0.0167162	0.0994723	0.0530682	0	0	coiled-coil_domain_containing_34
ENSG00000248866	0.445117	-0.226831	0.0106733	0.0772278	0.0412009	0	0	no_fct
ENSG00000100147	0.444966	0.222687	0.00340079	0.0448605	0.023933	0	0	coiled-coil_domain_containing_134
ENSG00000166598	0.444926	0.161634	0.0182593	0.104268	0.0556268	0	0	heat_shock_protein_90kDa_beta_(Grp94),_member_1
ENSG00000132963	0.444801	0.207262	0.00677889	0.0627212	0.0334616	0	0	proteasome_maturation_protein
ENSG00000139832	0.444783	0.550781	0.0120573	0.0831908	0.0443821	0	0	RAB20,_member_RAS_oncogene_family
ENSG00000226415	0.444304	0.152679	0.00378667	0.047135	0.0251464	0	0	triosephosphate_isomerase_1_pseudogene_1
ENSG00000124787	0.443952	0.13709	0.00589881	0.0590684	0.0315128	0	0	ribonuclease_P/MRP_40kDa_subunit
ENSG00000135437	0.443569	-0.088522	0.134115	0.322727	0.172174	0	0	retinol_dehydrogenase_5_(11-cis/9-cis)
ENSG00000141458	0.44286	0.243824	0.0020405	0.0352712	0.0188171	0	0	Niemann-Pick_disease,_type_C1
ENSG00000122884	0.442503	0.454059	0.0109813	0.0786821	0.0419767	0	0	prolyl_4-hydroxylase,_alpha_polypeptide_I
ENSG00000146859	0.44248	0.688767	0.0266802	0.128699	0.0686609	0	0	transmembrane_protein_140
ENSG00000106100	0.442166	0.472577	0.010391	0.0760184	0.0405556	0	0	nucleotide-binding_oligomerization_domain_containing_1
ENSG00000156958	0.442073	0.169729	0.00293476	0.04163	0.0222095	0	0	galactokinase_2
ENSG00000223723	0.442048	0.304039	0.166704	0.365948	0.195232	0	0	no_fct
ENSG00000033867	0.441897	-0.172642	0.000580575	0.0199167	0.0106255	0	0	solute_carrier_family_4,_sodium_bicarbonate_cotransporter,_member_7
ENSG00000188015	0.441575	-0.178494	0.0256303	0.125994	0.0672174	0	0	S100_calcium_binding_protein_A3
ENSG00000140511	0.441317	0.0582923	0.0759282	0.228968	0.122154	0	0	hyaluronan_and_proteoglycan_link_protein_3
ENSG00000225697	0.441168	0.245494	0.0153536	0.0950953	0.0507331	0	0	solute_carrier_family_26,_member_6
ENSG00000072818	0.441073	-0.0351315	0.203025	0.410684	0.219099	0	0	ArfGAP_with_coiled-coil,_ankyrin_repeat_and_PH_domains_1
ENSG00000164764	0.440888	-0.33715	0.0290273	0.134401	0.0717025	0	0	chromosome_8_open_reading_frame_84
ENSG00000183171	0.440545	0.512697	0.146887	0.339329	0.181031	0	0	no_fct
ENSG00000204264	0.439553	0.700391	0.00668473	0.0622357	0.0332026	0	0	proteasome_(prosome,_macropain)_subunit,_beta_type,_8_(large_multifunctional_peptidase_7)
ENSG00000188266	0.439544	-0.411763	0.222135	0.431995	0.230468	0	0	aminoglycoside_phosphotransferase_domain_containing_1
ENSG00000104983	0.439353	0.0140745	0.112264	0.289061	0.154214	0	0	coiled-coil_domain_containing_61
ENSG00000133961	0.439264	0.113471	0.00062153	0.0203624	0.0108633	0	0	numb_homolog_(Drosophila)
ENSG00000142871	0.438025	0.15131	0.0272204	0.130262	0.0694945	0	0	cysteine-rich,_angiogenic_inducer,_61
ENSG00000102393	0.437964	0.471761	0.00120477	0.027098	0.0144567	0	0	galactosidase,_alpha
ENSG00000204392	0.437857	0.237699	0.00636457	0.0605973	0.0323285	0	0	LSM2_homolog,_U6_small_nuclear_RNA_associated_(S._cerevisiae)
ENSG00000185838	0.437581	-0.161614	0.220662	0.430782	0.229821	0	0	guanine_nucleotide_binding_protein_(G_protein),_beta_polypeptide_1-like
ENSG00000254270	0.437475	1.3025	0.598023	0.766817	0.409095	0	0	no_fct
ENSG00000099901	0.43746	0.139387	0.0258772	0.126405	0.0674369	0	0	RAN_binding_protein_1
ENSG00000241288	0.437251	-0.385825	0.0153477	0.0950953	0.0507331	0	0	no_fct
ENSG00000151503	0.437199	0.122562	0.00983585	0.0741391	0.039553	0	0	non-SMC_condensin_II_complex,_subunit_D3
ENSG00000136715	0.437087	0.427091	0.00219603	0.0366529	0.0195542	0	0	Sin3A-associated_protein,_130kDa
ENSG00000173653	0.436354	0.122795	0.0219644	0.11543	0.0615814	0	0	RCE1_homolog,_prenyl_protein_peptidase_(S._cerevisiae)
ENSG00000140451	0.43635	-0.093787	0.00458956	0.0513829	0.0274127	0	0	PIF1_5'-to-3'_DNA_helicase_homolog_(S._cerevisiae)
ENSG00000115233	0.4363	0.185227	0.0025332	0.0389779	0.0207946	0	0	proteasome_(prosome,_macropain)_26S_subunit,_non-ATPase,_14
ENSG00000205683	0.436258	-0.102138	0.0856308	0.245554	0.131002	0	0	D4,_zinc_and_double_PHD_fingers,_family_3
ENSG00000103175	0.435996	-0.177214	0.0310479	0.1392	0.0742629	0	0	WAP_four-disulfide_core_domain_1
ENSG00000172264	0.435815	0.0365269	0.0322116	0.142079	0.0757988	0	0	MACRO_domain_containing_2
ENSG00000107937	0.435763	0.200245	0.0072876	0.0648392	0.0345916	0	0	GTP_binding_protein_4
ENSG00000166949	0.435479	-0.124555	0.00650908	0.0614166	0.0327656	0	0	SMAD_family_member_3
ENSG00000110104	0.434678	0.266811	0.0156434	0.0959212	0.0511738	0	0	coiled-coil_domain_containing_86
ENSG00000027075	0.434545	-0.0584819	0.178732	0.381146	0.20334	0	0	protein_kinase_C,_eta
ENSG00000113578	0.434529	0.398091	0.00834531	0.0689273	0.0367726	0	0	fibroblast_growth_factor_1_(acidic)
ENSG00000160050	0.433969	-0.0400572	0.00241324	0.0381684	0.0203628	0	0	coiled-coil_domain_containing_28B
ENSG00000163110	0.433896	0.1416	0.0194403	0.107466	0.0573327	0	0	PDZ_and_LIM_domain_5
ENSG00000115363	0.433026	0.303937	0.0115579	0.0809812	0.0432033	0	0	family_with_sequence_similarity_176,_member_A
ENSG00000233864	0.432938	0.0641878	0.00831752	0.068775	0.0366913	0	0	testis-specific_transcript,_Y-linked_15_(non-protein_coding)
ENSG00000155158	0.432808	0.448037	0.0402653	0.160095	0.0854101	0	0	tetratricopeptide_repeat_domain_39B
ENSG00000223485	0.432291	-0.218257	0.0032353	0.0437642	0.0233481	0	0	no_fct
ENSG00000189067	0.431941	-0.043742	0.000979936	0.024005	0.0128066	0	0	lipopolysaccharide-induced_TNF_factor
ENSG00000011260	0.431868	0.244984	0.0011619	0.0265508	0.0141648	0	0	UTP18,_small_subunit_(SSU)_processome_component,_homolog_(yeast)
ENSG00000164305	0.431782	0.130147	0.00165508	0.0316595	0.0168903	0	0	caspase_3,_apoptosis-related_cysteine_peptidase
ENSG00000176208	0.431573	0.285884	0.0588995	0.197766	0.105508	0	0	ATPase_family,_AAA_domain_containing_5
ENSG00000139233	0.43146	0.134877	0.0128215	0.0860013	0.0458815	0	0	LLP_homolog,_long-term_synaptic_facilitation_(Aplysia)
ENSG00000214182	0.431191	0.160693	0.0188366	0.105791	0.0564392	0	0	no_fct
ENSG00000196812	0.43084	0.101655	0.00671312	0.0623421	0.0332594	0	0	zinc_finger_and_SCAN_domain_containing_16
ENSG00000108846	0.430803	-0.330009	0.0213333	0.113798	0.0607108	0	0	ATP-binding_cassette,_sub-family_C_(CFTR/MRP),_member_3
ENSG00000213988	0.430728	0.114905	0.125415	0.310112	0.165444	0	0	zinc_finger_protein_90
ENSG00000184445	0.429813	0.231203	0.0459783	0.172511	0.0920342	0	0	kinetochore_associated_1
ENSG00000135521	0.429761	0.158242	0.0140698	0.0906356	0.0483539	0	0	LTV1_homolog_(S._cerevisiae)
ENSG00000225159	0.429756	0.390886	0.163672	0.362429	0.193355	0	0	no_fct
ENSG00000136997	0.429507	0.0687802	0.00875926	0.0703964	0.0375563	0	0	v-myc_myelocytomatosis_viral_oncogene_homolog_(avian)
ENSG00000120647	0.429414	0.336649	0.0783962	0.233018	0.124315	0	0	coiled-coil_domain_containing_77
ENSG00000010818	0.429313	0.127347	0.00184095	0.0334739	0.0178583	0	0	human_immunodeficiency_virus_type_I_enhancer_binding_protein_2
ENSG00000171202	0.429072	0.138948	0.00529798	0.055302	0.0295035	0	0	transmembrane_protein_126A
ENSG00000107443	0.428647	0.420411	0.0588475	0.197681	0.105463	0	0	cyclin_J
ENSG00000236792	0.428348	0.186748	0.161645	0.359781	0.191942	0	0	no_fct
ENSG00000117758	0.427438	0.25752	0.00673034	0.0624627	0.0333237	0	0	syntaxin_12
ENSG00000153975	0.427323	0.245504	0.0685847	0.215606	0.115026	0	0	zinc_finger_with_UFM1-specific_peptidase_domain
ENSG00000165732	0.426982	0.20759	0.0108624	0.0781734	0.0417053	0	0	DEAD_(Asp-Glu-Ala-Asp)_box_polypeptide_21
ENSG00000154640	0.426868	0.4312	0.0346624	0.147507	0.0786945	0	0	BTG_family,_member_3
ENSG00000004660	0.426758	0.238961	0.128744	0.315233	0.168176	0	0	calcium/calmodulin-dependent_protein_kinase_kinase_1,_alpha
ENSG00000122644	0.426653	0.196224	0.0723117	0.222569	0.11874	0	0	ADP-ribosylation_factor-like_4A
ENSG00000165501	0.42652	0.204881	0.106414	0.279646	0.14919	0	0	leucine_rich_repeat_protein_1
ENSG00000179041	0.426505	0.187448	0.0244461	0.122773	0.0654992	0	0	RRS1_ribosome_biogenesis_regulator_homolog_(S._cerevisiae)
ENSG00000107371	0.426109	0.141895	0.00430863	0.0496319	0.0264785	0	0	exosome_component_3
ENSG00000177425	0.425892	-0.0307318	0.00101972	0.0244579	0.0130483	0	0	PRKC,_apoptosis,_WT1,_regulator
ENSG00000177150	0.425699	0.233183	0.00900515	0.0714017	0.0380926	0	0	chromosome_18_open_reading_frame_19
ENSG00000189410	0.42569	0.51034	0.051373	0.183199	0.0977364	0	0	SH2_domain_containing_5
ENSG00000172403	0.425558	-0.584407	0.0012651	0.0276096	0.0147297	0	0	synaptopodin_2
ENSG00000183665	0.425356	0.0781685	0.00774963	0.0668825	0.0356817	0	0	tRNA_methyltransferase_12_homolog_(S._cerevisiae)
ENSG00000228519	0.425316	0.141352	0.0815984	0.238487	0.127232	0	0	no_fct
ENSG00000155465	0.425061	0.189623	0.0812806	0.23798	0.126962	0	0	solute_carrier_family_7_(amino_acid_transporter_light_chain,_y+L_system),_member_7
ENSG00000109814	0.42488	0.0782924	0.00377376	0.0470586	0.0251057	0	0	UDP-glucose_6-dehydrogenase
ENSG00000107949	0.424848	0.0577474	0.00633738	0.0604836	0.0322679	0	0	BRCA2_and_CDKN1A_interacting_protein
ENSG00000162613	0.424556	0.142021	0.00250783	0.0387096	0.0206515	0	0	far_upstream_element_(FUSE)_binding_protein_1
ENSG00000226696	0.424212	-0.298605	0.0962902	0.263956	0.14082	0	0	no_fct
ENSG00000230154	0.424127	0.228819	0.0917361	0.256791	0.136998	0	0	no_fct
ENSG00000179029	0.423913	-0.0234411	0.0483657	0.177333	0.0946066	0	0	transmembrane_protein_107
ENSG00000164466	0.423733	0.0631871	0.000429993	0.0181696	0.00969344	0	0	sideroflexin_1
ENSG00000164620	0.423066	0.264399	0.0601834	0.200475	0.106953	0	0	RELT-like_2
ENSG00000119969	0.422847	0.314556	0.0476812	0.175939	0.0938632	0	0	helicase,_lymphoid-specific
ENSG00000008513	0.4228	0.143406	0.00493174	0.0531861	0.0283747	0	0	ST3_beta-galactoside_alpha-2,3-sialyltransferase_1
ENSG00000177370	0.422383	0.12845	0.000591943	0.0199256	0.0106303	0	0	translocase_of_inner_mitochondrial_membrane_22_homolog_(yeast)
ENSG00000170027	0.422254	0.186526	0.000594322	0.0199515	0.0106441	0	0	tyrosine_3-monooxygenase/tryptophan_5-monooxygenase_activation_protein,_gamma_polypeptide
ENSG00000154721	0.422219	0.205902	0.189789	0.395999	0.211265	0	0	junctional_adhesion_molecule_2
ENSG00000119782	0.422101	0.406322	0.0397295	0.158896	0.0847708	0	0	FK506_binding_protein_1B,_12.6_kDa
ENSG00000110876	0.422018	-0.146019	0.0190402	0.106269	0.0566942	0	0	selectin_P_ligand
ENSG00000255875	0.421598	0.768218	0.493953	0.689351	0.367767	0	0	no_fct
ENSG00000127083	0.421217	-0.317265	0.0756199	0.228459	0.121883	0	0	osteomodulin
ENSG00000154582	0.421173	0.186737	0.00922345	0.072207	0.0385223	0	0	transcription_elongation_factor_B_(SIII),_polypeptide_1_(15kDa,_elongin_C)
ENSG00000183647	0.420926	0.292594	0.0280483	0.132013	0.0704289	0	0	zinc_finger_protein_530
ENSG00000163840	0.420859	1.22211	0.0270669	0.129903	0.0693032	0	0	deltex_3-like_(Drosophila)
ENSG00000235698	0.420597	0.550239	0.391403	0.602644	0.321509	0	0	no_fct
ENSG00000163701	0.420446	0.418684	0.0633471	0.206254	0.110036	0	0	interleukin_17_receptor_E
ENSG00000073008	0.420164	0.0272872	0.00570765	0.0580232	0.0309552	0	0	poliovirus_receptor
ENSG00000179967	0.420146	0.182523	0.00232492	0.0377063	0.0201162	0	0	no_fct
ENSG00000182261	0.420115	-0.113421	0.347532	0.562955	0.300335	0	0	NLR_family,_pyrin_domain_containing_10
ENSG00000105402	0.420079	0.584859	0.00424455	0.0493186	0.0263113	0	0	N-ethylmaleimide-sensitive_factor_attachment_protein,_alpha
ENSG00000143178	0.419901	-0.0380533	0.0451163	0.170432	0.090925	0	0	T-box_19
ENSG00000232630	0.419877	-0.116432	0.243159	0.455536	0.243027	0	0	no_fct
ENSG00000120694	0.419749	0.336276	0.00665651	0.0621251	0.0331436	0	0	heat_shock_105kDa/110kDa_protein_1
ENSG00000105792	0.419385	-0.0457952	0.0361283	0.151093	0.0806079	0	0	chromosome_7_open_reading_frame_63
ENSG00000188295	0.418745	0.27923	0.0955684	0.262926	0.14027	0	0	zinc_finger_protein_669
ENSG00000180867	0.418733	0.183406	0.0291544	0.134727	0.0718767	0	0	no_fct
ENSG00000184545	0.41838	0.070614	0.186395	0.391026	0.208612	0	0	dual_specificity_phosphatase_8
ENSG00000015153	0.417685	0.0462877	0.0184334	0.104693	0.0558537	0	0	YY1_associated_factor_2
ENSG00000161326	0.417484	0.22718	0.00243435	0.0382221	0.0203914	0	0	dual_specificity_phosphatase_14
ENSG00000091622	0.417216	0.0835027	0.0699785	0.218367	0.116498	0	0	PITPNM_family_member_3
ENSG00000177822	0.417139	0.229341	0.0496336	0.179556	0.0957926	0	0	no_fct
ENSG00000170571	0.41707	0.177195	0.0212535	0.113529	0.0605674	0	0	embigin
ENSG00000164182	0.417015	0.196571	0.006565	0.0617463	0.0329415	0	0	NADH_dehydrogenase_(ubiquinone)_1_alpha_subcomplex,_assembly_factor_2
ENSG00000248049	0.416872	-0.103621	0.0182686	0.104281	0.0556336	0	0	no_fct
ENSG00000256616	0.416758	0.07379	0.0496557	0.179556	0.0957929	0	0	no_fct
ENSG00000171208	0.416754	0.309688	0.0384079	0.155771	0.0831032	0	0	neuropilin_(NRP)_and_tolloid_(TLL)-like_2
ENSG00000137338	0.416266	-0.0296412	0.0760981	0.229292	0.122327	0	0	piggyBac_transposable_element_derived_1
ENSG00000163132	0.416057	0.682965	0.0833547	0.241892	0.129049	0	0	msh_homeobox_1
ENSG00000128590	0.415921	0.310284	0.0291619	0.134727	0.0718767	0	0	DnaJ_(Hsp40)_homolog,_subfamily_B,_member_9
ENSG00000164761	0.415769	-0.426843	0.00170821	0.0322565	0.0172087	0	0	tumor_necrosis_factor_receptor_superfamily,_member_11b
ENSG00000213190	0.415584	0.138262	0.0159706	0.0970775	0.0517906	0	0	myeloid/lymphoid_or_mixed-lineage_leukemia_(trithorax_homolog,_Drosophila);_translocated_to,_11
ENSG00000219699	0.415568	0.487418	0.483006	0.680883	0.36325	0	0	no_fct
ENSG00000100911	0.415357	0.462736	0.0336828	0.145512	0.0776303	0	0	proteasome_(prosome,_macropain)_activator_subunit_2_(PA28_beta)
ENSG00000160352	0.415313	0.213767	0.0748665	0.22735	0.121291	0	0	zinc_finger_protein_714
ENSG00000221914	0.415138	0.279129	0.0223992	0.116676	0.0622463	0	0	protein_phosphatase_2,_regulatory_subunit_B,_alpha
ENSG00000163734	0.414969	0.397289	0.23191	0.443212	0.236452	0	0	chemokine_(C-X-C_motif)_ligand_3
ENSG00000134602	0.414819	0.362793	0.12875	0.315233	0.168176	0	0	Serine/threonine-protein_kinase_MST4
ENSG00000072401	0.414638	0.0169662	0.00823835	0.0685313	0.0365613	0	0	ubiquitin-conjugating_enzyme_E2D_1
ENSG00000099810	0.414333	0.151786	0.00257107	0.0393144	0.0209741	0	0	methylthioadenosine_phosphorylase
ENSG00000101017	0.414241	0.264087	0.025295	0.125241	0.0668156	0	0	CD40_molecule,_TNF_receptor_superfamily_member_5
ENSG00000173621	0.414195	0.201876	0.176415	0.378013	0.201669	0	0	leucine_rich_repeat_and_fibronectin_type_III_domain_containing_4
ENSG00000176890	0.414067	0.31886	0.0432715	0.166873	0.0890262	0	0	thymidylate_synthetase
ENSG00000160932	0.413991	0.744385	0.0702393	0.218532	0.116586	0	0	lymphocyte_antigen_6_complex,_locus_E
ENSG00000248873	0.413839	0.086283	0.176699	0.378292	0.201818	0	0	no_fct
ENSG00000185973	0.413765	0.0188489	0.00287727	0.041248	0.0220057	0	0	trimethyllysine_hydroxylase,_epsilon
ENSG00000108651	0.413739	0.220905	0.00331029	0.0444506	0.0237143	0	0	UTP6,_small_subunit_(SSU)_processome_component,_homolog_(yeast)
ENSG00000145817	0.413642	0.132736	0.00414732	0.0490525	0.0261694	0	0	Yip1_domain_family,_member_5
ENSG00000163644	0.413304	1.23858	0.207498	0.415845	0.221852	0	0	protein_phosphatase,_Mg2+/Mn2+_dependent,_1K
ENSG00000101342	0.412971	0.85428	0.117934	0.298077	0.159024	0	0	chromosome_20_open_reading_frame_118
ENSG00000153485	0.412873	0.159729	0.0206219	0.111361	0.0594109	0	0	chromosome_14_open_reading_frame_109
ENSG00000226268	0.412679	0.100781	0.0199505	0.108987	0.0581442	0	0	no_fct
ENSG00000122986	0.412549	-0.254961	0.201186	0.40882	0.218104	0	0	hydrogen_voltage-gated_channel_1
ENSG00000131778	0.412172	0.0997462	0.011148	0.0794864	0.0424058	0	0	chromodomain_helicase_DNA_binding_protein_1-like
ENSG00000196449	0.412037	0.489613	0.0176328	0.102305	0.0545795	0	0	yrdC_domain_containing_(E._coli)
ENSG00000196083	0.411941	0.693476	0.0532976	0.186973	0.0997495	0	0	interleukin_1_receptor_accessory_protein
ENSG00000234629	0.411763	0.283345	0.270216	0.484722	0.258598	0	0	WD_repeat_domain_82_pseudogene_1
ENSG00000132792	0.411702	0.421703	0.0216641	0.114798	0.0612445	0	0	catenin,_beta_like_1
ENSG00000185565	0.411604	0.0642748	0.140451	0.331201	0.176695	0	0	limbic_system-associated_membrane_protein
ENSG00000111641	0.411534	0.147315	0.000491836	0.018757	0.0100068	0	0	NOP2_nucleolar_protein_homolog_(yeast)
ENSG00000141562	0.411401	0.165666	0.00238015	0.0380404	0.0202945	0	0	nuclear_prelamin_A_recognition_factor
ENSG00000159063	0.411091	0.199926	0.00179942	0.0330455	0.0176297	0	0	asparagine-linked_glycosylation_8,_alpha-1,3-glucosyltransferase_homolog_(S._cerevisiae)
ENSG00000117632	0.410754	0.178905	0.033684	0.145512	0.0776303	0	0	stathmin_1
ENSG00000251593	0.410695	0.32183	0.153963	0.348979	0.18618	0	0	no_fct
ENSG00000124882	0.410679	0.392452	0.0270218	0.129771	0.0692323	0	0	epiregulin
ENSG00000089280	0.410601	0.124428	0.00310353	0.0427295	0.0227961	0	0	fused_in_sarcoma
ENSG00000099821	0.410239	0.157493	0.0413937	0.16283	0.0868694	0	0	polymerase_(RNA)_mitochondrial_(DNA_directed)
ENSG00000229091	0.410209	1.17884	0.59045	0.760887	0.405931	0	0	no_fct
ENSG00000198331	0.410198	0.295138	0.0216219	0.114673	0.0611775	0	0	hydrolethalus_syndrome_1
ENSG00000244165	0.410055	0.207058	0.0336119	0.145463	0.0776044	0	0	purinergic_receptor_P2Y,_G-protein_coupled,_11
ENSG00000145779	0.40999	-0.205379	0.0493886	0.17934	0.0956774	0	0	tumor_necrosis_factor,_alpha-induced_protein_8
ENSG00000100483	0.409976	0.0443883	0.052415	0.184987	0.0986899	0	0	methyltransferase_like_21D
ENSG00000184047	0.409722	0.0354736	0.00258249	0.0394071	0.0210236	0	0	diablo,_IAP-binding_mitochondrial_protein
ENSG00000184220	0.409617	0.242055	0.0245154	0.122968	0.065603	0	0	chromosome_3_open_reading_frame_26
ENSG00000129484	0.409469	0.181553	0.0209128	0.112396	0.0599629	0	0	poly_(ADP-ribose)_polymerase_2
ENSG00000146197	0.409458	-0.00547277	0.0775585	0.231746	0.123636	0	0	no_fct
ENSG00000242687	0.40935	-0.108216	0.0118078	0.0821244	0.0438132	0	0	no_fct
ENSG00000158156	0.409265	0.161821	0.0139859	0.0903525	0.0482029	0	0	XK,_Kell_blood_group_complex_subunit-related_family,_member_8
ENSG00000229320	0.408976	0.186958	0.0606215	0.201342	0.107415	0	0	no_fct
ENSG00000146250	0.408586	-0.45693	0.135566	0.324997	0.173385	0	0	protease,_serine,_35
ENSG00000136982	0.408039	0.25206	0.0349215	0.147911	0.0789102	0	0	defective_in_sister_chromatid_cohesion_1_homolog_(S._cerevisiae)
ENSG00000204220	0.407915	0.166983	0.00176722	0.0327816	0.0174889	0	0	prefoldin_subunit_6
ENSG00000233695	0.407716	-0.171578	0.0370863	0.152599	0.081411	0	0	no_fct
ENSG00000029153	0.407634	0.312535	0.0092975	0.0725166	0.0386874	0	0	aryl_hydrocarbon_receptor_nuclear_translocator-like_2
ENSG00000247400	0.407523	-0.169603	0.107847	0.282032	0.150464	0	0	no_fct
ENSG00000138376	0.407337	0.553359	0.0742161	0.22631	0.120736	0	0	BRCA1_associated_RING_domain_1
ENSG00000240849	0.407313	0.0129933	0.00630025	0.0604836	0.0322679	0	0	transmembrane_protein_189
ENSG00000159231	0.406929	0.536152	0.0504359	0.181429	0.0967922	0	0	carbonyl_reductase_3
ENSG00000170417	0.406741	-0.239054	0.0248312	0.123693	0.0659901	0	0	transmembrane_protein_182
ENSG00000149591	0.406632	0.0176324	0.001319	0.0282423	0.0150672	0	0	transgelin
ENSG00000130511	0.406353	0.01641	0.105349	0.278451	0.148553	0	0	single_stranded_DNA_binding_protein_4
ENSG00000204390	0.406109	0.121046	0.00771232	0.0667543	0.0356133	0	0	heat_shock_70kDa_protein_1-like
ENSG00000179008	0.405616	0.225297	0.011715	0.0817252	0.0436002	0	0	chromosome_14_open_reading_frame_39
ENSG00000173546	0.405376	0.0794398	0.0518707	0.183948	0.0981361	0	0	chondroitin_sulfate_proteoglycan_4
ENSG00000074370	0.405243	-0.126178	0.110727	0.286549	0.152873	0	0	ATPase,_Ca++_transporting,_ubiquitous
ENSG00000163162	0.405036	0.381554	0.0190008	0.106194	0.0566541	0	0	ring_finger_protein_149
ENSG00000197803	0.405032	-0.2563	0.132871	0.321099	0.171305	0	0	no_fct
ENSG00000175471	0.404697	0.642331	0.191334	0.39742	0.212022	0	0	multiple_C2_domains,_transmembrane_1
ENSG00000132507	0.404689	0.143631	0.00268214	0.0398611	0.0212658	0	0	eukaryotic_translation_initiation_factor_5A
ENSG00000143469	0.40468	0.151966	0.0794906	0.235226	0.125492	0	0	synaptotagmin_XIV
ENSG00000162511	0.404275	0.205253	0.280708	0.496181	0.264711	0	0	lysosomal_protein_transmembrane_5
ENSG00000049323	0.404157	0.171152	0.0517283	0.183673	0.0979889	0	0	latent_transforming_growth_factor_beta_binding_protein_1
ENSG00000153391	0.404077	0.380278	0.00507961	0.0541151	0.0288703	0	0	INO80_complex_subunit_C
ENSG00000099994	0.404051	-0.562838	0.0620816	0.204117	0.108896	0	0	sushi_domain_containing_2
ENSG00000171223	0.403969	0.25888	0.137506	0.327765	0.174862	0	0	jun_B_proto-oncogene
ENSG00000123136	0.403804	0.416059	0.0296095	0.135969	0.0725393	0	0	DEAD_(Asp-Glu-Ala-Asp)_box_polypeptide_39A
ENSG00000038382	0.403593	0.0324396	0.00323034	0.0437642	0.0233481	0	0	triple_functional_domain_(PTPRF_interacting)
ENSG00000144959	0.403282	0.28592	0.0317036	0.140857	0.0751468	0	0	neutral_cholesterol_ester_hydrolase_1
ENSG00000113811	0.402529	0.262382	0.00468798	0.0520168	0.0277509	0	0	Selenoprotein_K
ENSG00000109107	0.401474	0.287158	0.0123204	0.0841048	0.0448697	0	0	aldolase_C,_fructose-bisphosphate
ENSG00000117143	0.401387	0.213219	0.00432472	0.0497393	0.0265358	0	0	UDP-N-acteylglucosamine_pyrophosphorylase_1
ENSG00000170852	0.40136	0.321439	0.0323913	0.142648	0.0761026	0	0	kelch_repeat_and_BTB_(POZ)_domain_containing_2
ENSG00000166833	0.401308	0.0742659	0.0346756	0.147507	0.0786945	0	0	neuron_navigator_2
ENSG00000141526	0.401202	0.102709	0.100338	0.270177	0.144139	0	0	solute_carrier_family_16,_member_3_(monocarboxylic_acid_transporter_4)
ENSG00000148344	0.401061	0.145278	0.026267	0.127436	0.067987	0	0	prostaglandin_E_synthase
ENSG00000099984	0.401002	0.0146293	0.0292437	0.134893	0.0719652	0	0	glutathione_S-transferase_theta_2
ENSG00000143353	0.400911	-0.139047	0.117633	0.297572	0.158754	0	0	lysophospholipase-like_1
ENSG00000250722	0.400621	-0.371885	0.135865	0.325608	0.173711	0	0	no_fct
ENSG00000196312	0.400562	0.10923	0.269841	0.484348	0.258398	0	0	hippocampus_abundant_transcript-like_2
ENSG00000005194	0.400197	0.082581	0.00132427	0.0282729	0.0150835	0	0	cytokine_induced_apoptosis_inhibitor_1
ENSG00000215807	0.400145	0.9182	0.5823	0.75528	0.40294	0	0	keratin_18_pseudogene_32
ENSG00000031081	0.399908	0.136815	0.0172135	0.101284	0.054035	0	0	Rho_GTPase_activating_protein_31
ENSG00000171806	0.399882	0.00335763	0.0298459	0.136465	0.0728036	0	0	methyltransferase_like_18
ENSG00000006118	0.399859	0.269837	0.030088	0.136705	0.0729319	0	0	transmembrane_protein_132A
ENSG00000100372	0.399847	0.137187	0.00872873	0.0702725	0.0374902	0	0	solute_carrier_family_25_(mitochondrial_carrier;_peroxisomal_membrane_protein,_34kDa),_member_17
ENSG00000157578	0.399803	-0.225069	0.159607	0.357029	0.190474	0	0	Leber_congenital_amaurosis_5-like
ENSG00000162746	0.399744	-0.0519297	0.0266011	0.128633	0.0686256	0	0	Fc_receptor-like_B
ENSG00000100342	0.399595	1.29598	0.099782	0.269439	0.143745	0	0	apolipoprotein_L,_1
ENSG00000203571	0.399573	-0.151479	0.00622977	0.0603291	0.0321854	0	0	Uncharacterized_protein
ENSG00000167985	0.399409	0.0904903	0.0519888	0.18419	0.0982647	0	0	succinate_dehydrogenase_complex_assembly_factor_2
ENSG00000039139	0.399185	-0.118666	0.0948035	0.261338	0.139423	0	0	dynein,_axonemal,_heavy_chain_5
ENSG00000169972	0.399172	-0.0649004	0.0296389	0.13601	0.0725609	0	0	pseudouridylate_synthase-like_1
ENSG00000164164	0.399166	0.293707	0.0126252	0.0851617	0.0454336	0	0	OTU_domain_containing_4
ENSG00000008394	0.399159	0.191315	0.0219932	0.115501	0.0616197	0	0	microsomal_glutathione_S-transferase_1
ENSG00000247317	0.39906	0.777087	0.0449831	0.170103	0.0907496	0	0	no_fct
ENSG00000255508	0.399018	0.114486	0.264329	0.478321	0.255183	0	0	no_fct
ENSG00000112379	0.398335	0.551644	0.0914045	0.256351	0.136763	0	0	KIAA1244
ENSG00000178896	0.398183	0.135344	0.0640637	0.20786	0.110893	0	0	exosome_component_4
ENSG00000017427	0.398057	-0.930331	0.37192	0.585879	0.312565	0	0	insulin-like_growth_factor_1_(somatomedin_C)
ENSG00000224550	0.397688	0.432053	0.169768	0.369695	0.197231	0	0	no_fct
ENSG00000169490	0.3974	0.22294	0.0021624	0.036353	0.0193943	0	0	TM2_domain_containing_2
ENSG00000145824	0.397317	-0.202115	0.440998	0.646382	0.344843	0	0	chemokine_(C-X-C_motif)_ligand_14
ENSG00000101224	0.397203	0.0277005	0.0345892	0.147361	0.0786167	0	0	cell_division_cycle_25_homolog_B_(S._pombe)
ENSG00000171246	0.397163	0.783567	0.230442	0.441531	0.235556	0	0	neuronal_pentraxin_I
ENSG00000104738	0.39702	0.157582	0.0524822	0.185046	0.0987219	0	0	minichromosome_maintenance_complex_component_4
ENSG00000153037	0.396998	0.141015	0.0518315	0.183898	0.0981092	0	0	signal_recognition_particle_19kDa
ENSG00000205593	0.396957	-0.301267	0.0967287	0.264623	0.141176	0	0	family_with_sequence_similarity_116,_member_B
ENSG00000091129	0.396949	0.384431	0.0283522	0.132653	0.0707701	0	0	neuronal_cell_adhesion_molecule
ENSG00000170498	0.396815	0.303785	0.0619208	0.203816	0.108736	0	0	KiSS-1_metastasis-suppressor
ENSG00000164221	0.39643	0.062694	0.0442277	0.168503	0.0898958	0	0	coiled-coil_domain_containing_112
ENSG00000172336	0.396174	0.114613	0.0126875	0.0854547	0.0455899	0	0	processing_of_precursor_7,_ribonuclease_P/MRP_subunit_(S._cerevisiae)
ENSG00000161544	0.396092	0.0412778	0.146896	0.339329	0.181031	0	0	cytoglobin
ENSG00000095319	0.39601	0.189455	0.00708004	0.0641696	0.0342344	0	0	nucleoporin_188kDa
ENSG00000142197	0.395924	0.0442643	0.00141659	0.0288868	0.0154111	0	0	dopey_family_member_2
ENSG00000137168	0.395659	0.104312	0.019956	0.108987	0.0581442	0	0	peptidylprolyl_isomerase_(cyclophilin)-like_1
ENSG00000160124	0.39559	0.312871	0.00961226	0.0732978	0.0391042	0	0	coiled-coil_domain_containing_58
ENSG00000172115	0.395494	0.25701	0.0409262	0.161447	0.0861317	0	0	cytochrome_c,_somatic
ENSG00000203644	0.394779	-0.0819061	0.0112793	0.0801536	0.0427617	0	0	no_fct
ENSG00000179859	0.394708	0.194749	0.0466004	0.173891	0.0927704	0	0	no_fct
ENSG00000215086	0.394701	0.238132	0.105908	0.279253	0.148981	0	0	no_fct
ENSG00000137124	0.394128	-0.0579113	0.000750812	0.0216134	0.0115307	0	0	aldehyde_dehydrogenase_1_family,_member_B1
ENSG00000228989	0.394084	0.0675154	0.0246475	0.123363	0.065814	0	0	no_fct
ENSG00000106351	0.393969	-0.0700407	0.0157938	0.0964814	0.0514726	0	0	ArfGAP_with_FG_repeats_2
ENSG00000154760	0.393949	0.281427	0.0306602	0.138072	0.0736613	0	0	schlafen_family_member_13
ENSG00000142961	0.39348	0.528552	0.00131738	0.0282423	0.0150672	0	0	MOB1,_Mps_One_Binder_kinase_activator-like_2C_(yeast)
ENSG00000156802	0.393291	0.274057	0.0461894	0.173019	0.0923053	0	0	ATPase_family,_AAA_domain_containing_2
ENSG00000110944	0.39318	0.626433	0.0224435	0.116857	0.0623428	0	0	interleukin_23,_alpha_subunit_p19
ENSG00000041357	0.39317	0.341755	0.0341209	0.146333	0.0780683	0	0	proteasome_(prosome,_macropain)_subunit,_alpha_type,_4
ENSG00000168653	0.392817	0.100165	0.00435843	0.0498856	0.0266138	0	0	NADH_dehydrogenase_(ubiquinone)_Fe-S_protein_5,_15kDa_(NADH-coenzyme_Q_reductase)
ENSG00000008324	0.392502	0.275137	0.015548	0.0956148	0.0510103	0	0	synovial_sarcoma_translocation_gene_on_chromosome_18-like_2
ENSG00000198018	0.391871	-0.0110616	0.00900129	0.0714017	0.0380926	0	0	ectonucleoside_triphosphate_diphosphohydrolase_7
ENSG00000148120	0.391843	-0.0785128	0.00091671	0.0233848	0.0124757	0	0	chromosome_9_open_reading_frame_3
ENSG00000233846	0.391504	0.169803	0.0361357	0.151093	0.0806079	0	0	no_fct
ENSG00000176788	0.390906	-0.0211476	0.006606	0.0618925	0.0330195	0	0	brain_abundant,_membrane_attached_signal_protein_1
ENSG00000127080	0.390596	0.1514	0.00330059	0.0444205	0.0236982	0	0	inositol_1,3,4,5,6-pentakisphosphate_2-kinase
ENSG00000132003	0.390453	0.034695	0.0180279	0.103388	0.0551573	0	0	zinc_finger,_SWIM-type_containing_4
ENSG00000155660	0.390355	0.19908	0.00130166	0.0280754	0.0149782	0	0	protein_disulfide_isomerase_family_A,_member_4
ENSG00000159176	0.390344	-0.0737339	0.00630934	0.0604836	0.0322679	0	0	cysteine_and_glycine-rich_protein_1
ENSG00000135905	0.389998	0.049406	0.0158856	0.0968009	0.051643	0	0	dedicator_of_cytokinesis_10
ENSG00000163827	0.389962	-0.0139196	0.0814528	0.238274	0.127119	0	0	leucine_rich_repeat_containing_2
ENSG00000123009	0.389506	0.567192	0.0510278	0.18234	0.0972779	0	0	non-metastatic_cells_2,_protein_(NM23B)_expressed_in,_pseudogene_1
ENSG00000156509	0.389384	0.26805	0.139281	0.329818	0.175957	0	0	F-box_protein_43
ENSG00000118655	0.389252	0.0775044	0.0247661	0.123579	0.0659289	0	0	DNA_cross-link_repair_1B
ENSG00000029639	0.389227	0.108675	0.0282701	0.132395	0.0706324	0	0	transcription_factor_B1,_mitochondrial
ENSG00000166133	0.389146	0.132066	0.0115599	0.0809812	0.0432033	0	0	RNA_pseudouridylate_synthase_domain_containing_2
ENSG00000135048	0.38894	0.0208405	0.00422668	0.0491887	0.0262421	0	0	transmembrane_protein_2
ENSG00000084628	0.388775	1.39884	0.279581	0.494962	0.264061	0	0	Na+/K+_transporting_ATPase_interacting_1
ENSG00000233966	0.388662	0.230883	0.00950648	0.073046	0.0389699	0	0	no_fct
ENSG00000110880	0.38861	0.04603	0.00342099	0.0449866	0.0240002	0	0	coronin,_actin_binding_protein,_1C
ENSG00000136950	0.38841	0.164979	0.00689141	0.0633999	0.0338237	0	0	actin_related_protein_2/3_complex,_subunit_5-like
ENSG00000124613	0.388198	0.036572	0.0847863	0.244167	0.130263	0	0	zinc_finger_protein_391
ENSG00000162924	0.387878	0.0255875	0.163196	0.361592	0.192909	0	0	v-rel_reticuloendotheliosis_viral_oncogene_homolog_(avian)
ENSG00000172172	0.387781	0.137519	0.0233836	0.119643	0.0638291	0	0	mitochondrial_ribosomal_protein_L13
ENSG00000124688	0.387596	0.339533	0.0104964	0.0763987	0.0407586	0	0	MAD2L1_binding_protein
ENSG00000112578	0.387538	0.159	0.00448192	0.050832	0.0271187	0	0	bystin-like
ENSG00000136052	0.387531	0.240593	0.00632587	0.0604836	0.0322679	0	0	solute_carrier_family_41,_member_2
ENSG00000139410	0.387408	0.0304891	0.0410411	0.161767	0.0863023	0	0	serine_dehydratase-like
ENSG00000135074	0.387159	0.0895968	0.00476444	0.0522632	0.0278823	0	0	ADAM_metallopeptidase_domain_19
ENSG00000085117	0.387154	-0.0152748	0.108812	0.283398	0.151192	0	0	CD82_molecule
ENSG00000225471	0.386722	0.342568	0.369063	0.58319	0.311131	0	0	no_fct
ENSG00000153064	0.38662	0.205638	0.25202	0.464797	0.247968	0	0	B-cell_scaffold_protein_with_ankyrin_repeats_1
ENSG00000123505	0.386326	0.187262	0.0190208	0.106224	0.0566705	0	0	adenosylmethionine_decarboxylase_1
ENSG00000156414	0.386194	0.333691	0.0150737	0.0942958	0.0503066	0	0	tudor_domain_containing_9
ENSG00000180329	0.385955	0.132034	0.0168236	0.0998751	0.0532832	0	0	coiled-coil_domain_containing_43
ENSG00000145681	0.385871	0.354995	0.0519455	0.184169	0.0982539	0	0	hyaluronan_and_proteoglycan_link_protein_1
ENSG00000234664	0.385856	-0.00817779	0.0227582	0.117678	0.0627809	0	0	high_mobility_group_nucleosomal_binding_domain_2_pseudogene_5
ENSG00000213856	0.38578	0.0134808	0.0972377	0.265473	0.141629	0	0	no_fct
ENSG00000133302	0.385749	0.383927	0.0378151	0.154101	0.0822125	0	0	ankyrin_repeat_domain_32
ENSG00000119986	0.385646	0.0983535	0.0196278	0.108055	0.0576473	0	0	arginine_vasopressin-induced_1
ENSG00000196204	0.385214	0.0672116	0.00434473	0.0498856	0.0266138	0	0	ring_finger_protein_216-like
ENSG00000162894	0.385101	0.129611	0.27468	0.489348	0.261066	0	0	Fas_apoptotic_inhibitory_molecule_3
ENSG00000225964	0.384855	1.78647	0.528076	0.715643	0.381794	0	0	no_fct
ENSG00000077348	0.384369	0.14047	0.0275004	0.130705	0.0697307	0	0	exosome_component_5
ENSG00000066557	0.38386	0.0746778	0.0508296	0.182063	0.0971304	0	0	leucine_rich_repeat_containing_40
ENSG00000111348	0.383688	-0.196276	0.0288813	0.134077	0.0715299	0	0	Rho_GDP_dissociation_inhibitor_(GDI)_beta
ENSG00000241494	0.383605	0.959424	0.445823	0.650472	0.347025	0	0	no_fct
ENSG00000128713	0.383556	-0.11341	0.121089	0.303032	0.161667	0	0	homeobox_D11
ENSG00000006062	0.383175	0.0555217	0.00143157	0.0290565	0.0155016	0	0	mitogen-activated_protein_kinase_kinase_kinase_14
ENSG00000145623	0.383174	0.0605276	0.00189849	0.0339668	0.0181212	0	0	oncostatin_M_receptor
ENSG00000114737	0.383108	-0.532005	0.181824	0.385172	0.205488	0	0	cytokine_inducible_SH2-containing_protein
ENSG00000185634	0.382991	0.164912	0.267918	0.481912	0.257099	0	0	SHC_(Src_homology_2_domain_containing)_family,_member_4
ENSG00000235750	0.382649	0.441416	0.148402	0.341351	0.18211	0	0	KIAA0040
ENSG00000253710	0.382627	0.213583	0.0139602	0.0903055	0.0481778	0	0	asparagine-linked_glycosylation_11,_alpha-1,2-mannosyltransferase_homolog_(yeast)
ENSG00000124216	0.381871	0.155296	0.205708	0.413496	0.220599	0	0	snail_homolog_1_(Drosophila)
ENSG00000105989	0.381843	-0.298231	0.105997	0.279253	0.148981	0	0	wingless-type_MMTV_integration_site_family_member_2
ENSG00000105767	0.381697	0.0677655	0.0456073	0.171713	0.0916086	0	0	cell_adhesion_molecule_4
ENSG00000083067	0.381672	-0.211321	0.249703	0.462021	0.246487	0	0	transient_receptor_potential_cation_channel,_subfamily_M,_member_3
ENSG00000196290	0.381622	0.160972	0.0149687	0.0939377	0.0501156	0	0	NIF3_NGG1_interacting_factor_3-like_1_(S._pombe)
ENSG00000099958	0.381227	0.615557	0.199874	0.407361	0.217326	0	0	Der1-like_domain_family,_member_3
ENSG00000123570	0.381121	-0.260873	0.0519801	0.18419	0.0982647	0	0	RAB9B,_member_RAS_oncogene_family
ENSG00000130748	0.38108	0.162875	0.0729511	0.223798	0.119396	0	0	transmembrane_protein_160
ENSG00000219201	0.38107	0.265748	0.038078	0.154842	0.082608	0	0	no_fct
ENSG00000218890	0.380999	-0.00689311	0.110568	0.286426	0.152807	0	0	no_fct
ENSG00000149948	0.3807	0.124549	0.011821	0.0821314	0.0438169	0	0	high_mobility_group_AT-hook_2
ENSG00000118513	0.380625	0.121997	0.452144	0.655663	0.349795	0	0	v-myb_myeloblastosis_viral_oncogene_homolog_(avian)
ENSG00000116830	0.38055	0.352523	0.0100356	0.0748336	0.0399235	0	0	transcription_termination_factor,_RNA_polymerase_II
ENSG00000113916	0.38054	0.116717	0.00726333	0.0648392	0.0345916	0	0	B-cell_CLL/lymphoma_6
ENSG00000155324	0.380336	-0.10134	0.00785311	0.0673975	0.0359564	0	0	GRAM_domain_containing_3
ENSG00000126778	0.380313	0.14938	0.0105402	0.076604	0.0408681	0	0	SIX_homeobox_1
ENSG00000155367	0.380304	0.475432	0.113273	0.290784	0.155132	0	0	protein_phosphatase,_Mg2+/Mn2+_dependent,_1J
ENSG00000064989	0.379983	0.152061	0.344126	0.559905	0.298708	0	0	calcitonin_receptor-like
ENSG00000235411	0.379857	0.41003	0.279108	0.494642	0.26389	0	0	no_fct
ENSG00000219023	0.37984	0.582116	0.423325	0.631235	0.336763	0	0	no_fct
ENSG00000084070	0.379759	0.18257	0.00123123	0.0274574	0.0146485	0	0	small_ArfGAP2
ENSG00000158715	0.37972	0.187271	0.0209551	0.1125	0.0600183	0	0	solute_carrier_family_45,_member_3
ENSG00000009844	0.379644	0.112136	0.0169644	0.100501	0.0536169	0	0	Vps20-associated_1_homolog_(S._cerevisiae)
ENSG00000144597	0.379425	0.137513	0.00764549	0.0666262	0.0355449	0	0	ELL_associated_factor_1
ENSG00000137936	0.379239	0.237225	0.00986875	0.0741795	0.0395746	0	0	breast_cancer_anti-estrogen_resistance_3
ENSG00000001561	0.379178	0.380514	0.203372	0.410828	0.219176	0	0	ectonucleotide_pyrophosphatase/phosphodiesterase_4_(putative)
ENSG00000104381	0.37909	-0.0957917	0.0241829	0.122129	0.0651555	0	0	ganglioside-induced_differentiation-associated_protein_1
ENSG00000122121	0.378915	-0.44297	0.433652	0.639821	0.341343	0	0	X-prolyl_aminopeptidase_(aminopeptidase_P)_2,_membrane-bound
ENSG00000185839	0.378875	0.331479	0.0183529	0.104518	0.0557603	0	0	no_fct
ENSG00000171314	0.378634	0.262921	0.00918844	0.0721428	0.038488	0	0	phosphoglycerate_mutase_1_(brain)
ENSG00000197444	0.378577	0.919667	0.523842	0.712499	0.380116	0	0	oxoglutarate_dehydrogenase-like
ENSG00000231770	0.378467	-0.151821	0.0790918	0.234517	0.125115	0	0	no_fct
ENSG00000026559	0.37826	0.041691	0.186276	0.390893	0.208541	0	0	potassium_voltage-gated_channel,_subfamily_G,_member_1
ENSG00000111231	0.378058	0.204842	0.0199643	0.108987	0.0581442	0	0	GPN-loop_GTPase_3
ENSG00000141384	0.377856	0.514026	0.0438202	0.167826	0.0895349	0	0	TAF4b_RNA_polymerase_II,_TATA_box_binding_protein_(TBP)-associated_factor,_105kDa
ENSG00000229811	0.377694	-0.00842458	0.134646	0.323633	0.172658	0	0	no_fct
ENSG00000108106	0.377513	0.249265	0.139428	0.330059	0.176086	0	0	ubiquitin-conjugating_enzyme_E2S
ENSG00000095383	0.377277	-0.272605	0.0471763	0.175022	0.093374	0	0	TBC1_domain_family,_member_2
ENSG00000162654	0.37716	1.71015	0.235454	0.446965	0.238455	0	0	guanylate_binding_protein_4
ENSG00000042062	0.376907	0.305347	0.088044	0.249735	0.133233	0	0	family_with_sequence_similarity_65,_member_C
ENSG00000135241	0.376887	-0.0164327	0.00966433	0.0734434	0.0391819	0	0	patatin-like_phospholipase_domain_containing_8
ENSG00000205746	0.376884	0.435944	0.328642	0.545328	0.290931	0	0	no_fct
ENSG00000117226	0.376716	0.613887	0.113301	0.290784	0.155132	0	0	guanylate_binding_protein_3
ENSG00000255766	0.376694	-0.0298424	0.101845	0.272886	0.145584	0	0	no_fct
ENSG00000234465	0.376657	0.318336	0.191811	0.398186	0.212431	0	0	no_fct
ENSG00000123395	0.376602	0.129873	0.0201576	0.10974	0.0585461	0	0	chromosome_12_open_reading_frame_44
ENSG00000117475	0.376137	0.754422	0.143664	0.334966	0.178704	0	0	basic_leucine_zipper_nuclear_factor_1
ENSG00000127774	0.376102	0.117365	0.0321147	0.141779	0.0756386	0	0	transmembrane_protein_93
ENSG00000128708	0.374914	0.224628	0.0374518	0.153288	0.0817787	0	0	histone_acetyltransferase_1
ENSG00000253276	0.374806	-0.199711	0.0548225	0.190019	0.101375	0	0	no_fct
ENSG00000182544	0.374135	0.122481	0.0167467	0.0995795	0.0531254	0	0	major_facilitator_superfamily_domain_containing_5
ENSG00000116285	0.373984	0.104311	0.0452964	0.17093	0.0911906	0	0	ERBB_receptor_feedback_inhibitor_1
ENSG00000187790	0.373725	0.113873	0.0465447	0.173891	0.0927704	0	0	Fanconi_anemia,_complementation_group_M
ENSG00000176593	0.37363	-0.0993607	0.0179451	0.103114	0.0550112	0	0	Uncharacterized_proteincDNA_FLJ37429_fis,_clone_BRAWH2001666
ENSG00000167670	0.3733	0.189493	0.0292065	0.134849	0.0719415	0	0	chromatin_assembly_factor_1,_subunit_A_(p150)
ENSG00000205571	0.373231	-0.164308	0.122996	0.30631	0.163416	0	0	survival_of_motor_neuron_2,_centromeric
ENSG00000109270	0.372837	0.0974627	0.00687276	0.0633866	0.0338166	0	0	late_endosomal/lysosomal_adaptor,_MAPK_and_MTOR_activator_3
ENSG00000221955	0.372737	-0.222209	0.00468753	0.0520168	0.0277509	0	0	solute_carrier_family_12_(potassium/chloride_transporters),_member_8
ENSG00000075785	0.372637	0.15842	0.0015466	0.0303279	0.0161799	0	0	RAB7A,_member_RAS_oncogene_family
ENSG00000100749	0.37236	0.250373	0.0797223	0.235674	0.125732	0	0	vaccinia_related_kinase_1
ENSG00000182004	0.372286	0.0313982	0.118679	0.299424	0.159742	0	0	small_nuclear_ribonucleoprotein_polypeptide_E
ENSG00000119737	0.372085	0.137668	0.0917885	0.256889	0.13705	0	0	G_protein-coupled_receptor_75
ENSG00000129559	0.372029	0.211831	0.0272845	0.130341	0.0695364	0	0	neural_precursor_cell_expressed,_developmentally_down-regulated_8
ENSG00000120334	0.371416	0.261444	0.0247391	0.12357	0.0659242	0	0	centromere_protein_L
ENSG00000231989	0.371384	-0.00514385	0.0693941	0.217164	0.115856	0	0	protein_phosphatase_1,_regulatory_(inhibitor)_subunit_2_pseudogene_3
ENSG00000159403	0.371317	0.215657	0.100017	0.269567	0.143814	0	0	complement_component_1,_r_subcomponent
ENSG00000169139	0.371111	0.0119255	0.0194117	0.107384	0.0572889	0	0	ubiquitin-conjugating_enzyme_E2_variant_2
ENSG00000034063	0.370814	0.027485	0.016427	0.0984754	0.0525364	0	0	ubiquitin-like_with_PHD_and_ring_finger_domains_1
ENSG00000158125	0.370759	0.084119	0.0402852	0.160095	0.0854101	0	0	xanthine_dehydrogenase
ENSG00000173821	0.370634	0.932742	0.0435988	0.167583	0.089405	0	0	ring_finger_protein_213
ENSG00000244026	0.370575	-0.268869	0.537055	0.722789	0.385606	0	0	family_with_sequence_similarity_86,_member_D,_pseudogene
ENSG00000091490	0.370447	0.0478655	0.0490948	0.178772	0.0953742	0	0	sel-1_suppressor_of_lin-12-like_3_(C._elegans)
ENSG00000166396	0.370365	-0.482057	0.0164312	0.0984754	0.0525364	0	0	serpin_peptidase_inhibitor,_clade_B_(ovalbumin),_member_7
ENSG00000205544	0.370206	-0.0245488	0.157564	0.354562	0.189158	0	0	chromosome_17_open_reading_frame_61
ENSG00000131015	0.370001	0.0759045	0.0332523	0.144631	0.0771602	0	0	UL16_binding_protein_2
ENSG00000197757	0.36993	0.0160748	0.154965	0.350565	0.187026	0	0	homeobox_C6
ENSG00000150961	0.369902	0.168764	0.00231505	0.0376291	0.020075	0	0	SEC24_family,_member_D_(S._cerevisiae)
ENSG00000237807	0.36981	0.0232539	0.413771	0.621713	0.331682	0	0	no_fct
ENSG00000104892	0.369495	-0.125712	0.233574	0.444888	0.237347	0	0	kinesin_light_chain_3
ENSG00000115762	0.369464	0.172942	0.00265896	0.0397174	0.0211891	0	0	pleckstrin_homology_domain_containing,_family_B_(evectins)_member_2
ENSG00000141076	0.36927	0.195033	0.00809986	0.0680462	0.0363025	0	0	cirrhosis,_autosomal_recessive_1A_(cirhin)
ENSG00000167264	0.36845	-0.0133896	0.00808728	0.0680462	0.0363025	0	0	dihydrouridine_synthase_2-like,_SMM1_homolog_(S._cerevisiae)
[truncated: 12,712 more rows]

## Sheet: Uninfected vs 12 hpi
ENSEMBL ID	log2Fold-change	AveExpr	P-value	Adj.P-value	Qval	Qvals.FC	Adjusted Pvals.FC	Annotation
ENSG00000134321	5.73782	5.3405	2.36327e-09	3.47637e-05	1.89332e-05	1	1	radical_S-adenosyl_methionine_domain_containing_2
[truncated: 14,710 more rows]

## Sheet: Uninfected vs 24 hpi
ENSEMBL ID	log2Fold-change	AveExpr	P-value	Adj.P-value	Qval	Qvals.FC	Adjusted Pvals.FC	Annotation
[truncated: 14,711 more rows]

[truncated: 17 more sheets: Uninfected vs 48 hpi, Uninfected vs 72 hpi, i4_vs_i6, i4_vs_i12, i4_vs_i24, i4_vs_i48, i4_vs_i72, i6_vs_i12, i6_vs_i24, i6_vs_i48, i6_vs_i72, i12_vs_i24, i12_vs_i48, i12_vs_i72, i24_vs_i48, i24_vs_i72, i48_vs_i72]
